# Supplementary material for: A Highly Selective Turn-On Fluorescent Probe for the Detection of Zinc
Source: MDPI journal article supplement (doi:10.3390/molecules26133825), 2021-06-23

# checkCIF/PLATON report

Structure factors have been supplied for datablock(s) Cu-Zn

THIS REPORT IS FOR GUIDANCE ONLY. IF USED AS PART OF A REVIEW PROCEDURE FOR PUBLICATION, IT SHOULD NOT REPLACE THE EXPERTISE OF AN EXPERIENCED CRYSTALLOGRAPHIC REFEREE.

No syntax errors found.      CIF dictionary      Interpreting this report

## Datablock: Cu-Zn

---

|                 |                           |                                |
|-----------------|---------------------------|--------------------------------|
| Bond precision: | C-C = 0.0148 Å            | Wavelength=0.71073             |
| Cell:           | a=9.9812(11)              | b=19.966(2)      c=11.0609(12) |
|                 | alpha=90                  | beta=105.840(4)      gamma=90  |
| Temperature:    | 293 K                     |                                |
|                 | Calculated                | Reported                       |
| Volume          | 2120.6(4)                 | 2120.6(4)                      |
| Space group     | P 21                      | P 1 21 1                       |
| Hall group      | P 2yb                     | P 2yb                          |
| Moiety formula  | C38 H50 Cl4 Cu2 N4 O6 Zn2 | 2(C19 H25 Cl2 Cu N2 O3 Zn)     |
| Sum formula     | C38 H50 Cl4 Cu2 N4 O6 Zn2 | C38 H50 Cl4 Cu2 N4 O6 Zn2      |
| Mr              | 1058.50                   | 1058.44                        |
| Dx,g cm-3       | 1.658                     | 1.658                          |
| Z               | 2                         | 2                              |
| Mu (mm-1)       | 2.408                     | 2.408                          |
| F000            | 1080.0                    | 1080.0                         |
| F000'           | 1083.87                   |                                |
| h,k,lmax        | 11,23,13                  | 11,23,13                       |
| Nref            | 7447[ 3840]               | 7370                           |
| Tmin,Tmax       | 0.567,0.618               | 0.486,0.645                    |
| Tmin'           | 0.426                     |                                |

Correction method= # Reported T Limits: Tmin=0.486 Tmax=0.645  
AbsCorr = MULTI-SCAN

Data completeness= 1.92/0.99      Theta(max)= 24.996

R(reflections)= 0.0718( 6072)      wR2(reflections)= 0.1799( 7370)

S = 0.999      Npar= 511

---

The following ALERTS were generated. Each ALERT has the format  
**test-name\_ALERT\_alert-type\_alert-level.**  
Click on the hyperlinks for more details of the test.

---

**Alert level B**

PLAT035\_ALERT\_1\_B \_chemical\_absolute\_configuration Info Not Given Please Do !  
PLAT936\_ALERT\_2\_B The Embedded .res File Includes a DAMP Command . 600.0 Report

---

**Alert level C**

ABSTY02\_ALERT\_1\_C An \_exptl\_absorpt\_correction\_type has been given without  
a literature citation. This should be contained in the  
\_exptl\_absorpt\_process\_details field.  
Absorption correction given as multi-scan  
RINTA01\_ALERT\_3\_C The value of Rint is greater than 0.12  
Rint given 0.177  
PLAT020\_ALERT\_3\_C The Value of Rint is Greater Than 0.12 ..... 0.177 Report  
PLAT090\_ALERT\_3\_C Poor Data / Parameter Ratio (Zmax > 18) ..... 7.50 Note  
PLAT241\_ALERT\_2\_C High 'MainMol' Ueq as Compared to Neighbors of C12 Check  
PLAT241\_ALERT\_2\_C High 'MainMol' Ueq as Compared to Neighbors of C13 Check  
PLAT241\_ALERT\_2\_C High 'MainMol' Ueq as Compared to Neighbors of C7 Check  
PLAT341\_ALERT\_3\_C Low Bond Precision on C-C Bonds ..... 0.01479 Ang.  
PLAT362\_ALERT\_2\_C Short C(sp3)-C(sp2) Bond C2 - C3 . 1.37 Ang.  
PLAT362\_ALERT\_2\_C Short C(sp3)-C(sp2) Bond C21 - C22 . 1.37 Ang.  
PLAT790\_ALERT\_4\_C Centre of Gravity not Within Unit Cell: Resd. # 1 Note  
C38 H50 Cl4 Cu2 N4 O6 Zn2  
PLAT911\_ALERT\_3\_C Missing FCF Refl Between Thmin & STh/L= 0.595 8 Report  
PLAT977\_ALERT\_2\_C Check Negative Difference Density on H22B -0.35 eA-3

---

**Alert level G**

PLAT042\_ALERT\_1\_G Calc. and Reported MoietyFormula Strings Differ Please Check  
PLAT072\_ALERT\_2\_G SHELXL First Parameter in WGHT Unusually Large 0.10 Report  
PLAT115\_ALERT\_5\_G ADDSYM Detects Noncrystallographic Inversion ... 85% Check  
PLAT199\_ALERT\_1\_G Reported \_cell\_measurement\_temperature ..... (K) 293 Check  
PLAT200\_ALERT\_1\_G Reported \_diffrn\_ambient\_temperature ..... (K) 293 Check  
PLAT232\_ALERT\_2\_G Hirshfeld Test Diff (M-X) Cu2 --Cl2 . 6.6 s.u.  
PLAT343\_ALERT\_2\_G Unusual sp3 Angle Range in Main Residue for C3 Check  
PLAT343\_ALERT\_2\_G Unusual sp3 Angle Range in Main Residue for C22 Check  
PLAT791\_ALERT\_4\_G Model has Chirality at C6 (Sohnke SpGr) R Verify  
PLAT791\_ALERT\_4\_G Model has Chirality at C11 (Sohnke SpGr) R Verify  
PLAT791\_ALERT\_4\_G Model has Chirality at C25 (Sohnke SpGr) R Verify  
PLAT791\_ALERT\_4\_G Model has Chirality at C30 (Sohnke SpGr) R Verify  
PLAT794\_ALERT\_5\_G Tentative Bond Valency for Zn1 (II) . 2.02 Info  
PLAT794\_ALERT\_5\_G Tentative Bond Valency for Zn2 (II) . 2.04 Info  
PLAT794\_ALERT\_5\_G Tentative Bond Valency for Cu1 (II) . 2.35 Info  
PLAT794\_ALERT\_5\_G Tentative Bond Valency for Cu2 (II) . 2.37 Info  
PLAT883\_ALERT\_1\_G No Info/Value for \_atom\_sites\_solution\_primary . Please Do !  
PLAT909\_ALERT\_3\_G Percentage of I>2sig(I) Data at Theta(Max) Still 52% Note  
PLAT961\_ALERT\_5\_G Dataset Contains no Negative Intensities ..... Please Check  
PLAT978\_ALERT\_2\_G Number C-C Bonds with Positive Residual Density. 0 Info

---

- 0 **ALERT level A** = Most likely a serious problem - resolve or explain  
2 **ALERT level B** = A potentially serious problem, consider carefully  
13 **ALERT level C** = Check. Ensure it is not caused by an omission or oversight  
20 **ALERT level G** = General information/check it is not something unexpected

- 6 ALERT type 1 CIF construction/syntax error, inconsistent or missing data  
12 ALERT type 2 Indicator that the structure model may be wrong or deficient  
6 ALERT type 3 Indicator that the structure quality may be low  
5 ALERT type 4 Improvement, methodology, query or suggestion  
6 ALERT type 5 Informative message, check
-

It is advisable to attempt to resolve as many as possible of the alerts in all categories. Often the minor alerts point to easily fixed oversights, errors and omissions in your CIF or refinement strategy, so attention to these fine details can be worthwhile. In order to resolve some of the more serious problems it may be necessary to carry out additional measurements or structure refinements. However, the purpose of your study may justify the reported deviations and the more serious of these should normally be commented upon in the discussion or experimental section of a paper or in the "special\_details" fields of the CIF. checkCIF was carefully designed to identify outliers and unusual parameters, but every test has its limitations and alerts that are not important in a particular case may appear. Conversely, the absence of alerts does not guarantee there are no aspects of the results needing attention. It is up to the individual to critically assess their own results and, if necessary, seek expert advice.

### **Publication of your CIF in IUCr journals**

A basic structural check has been run on your CIF. These basic checks will be run on all CIFs submitted for publication in IUCr journals (*Acta Crystallographica*, *Journal of Applied Crystallography*, *Journal of Synchrotron Radiation*); however, if you intend to submit to *Acta Crystallographica Section C* or *E* or *IUCrData*, you should make sure that full publication checks are run on the final version of your CIF prior to submission.

### **Publication of your CIF in other journals**

Please refer to the *Notes for Authors* of the relevant journal for any special instructions relating to CIF submission.

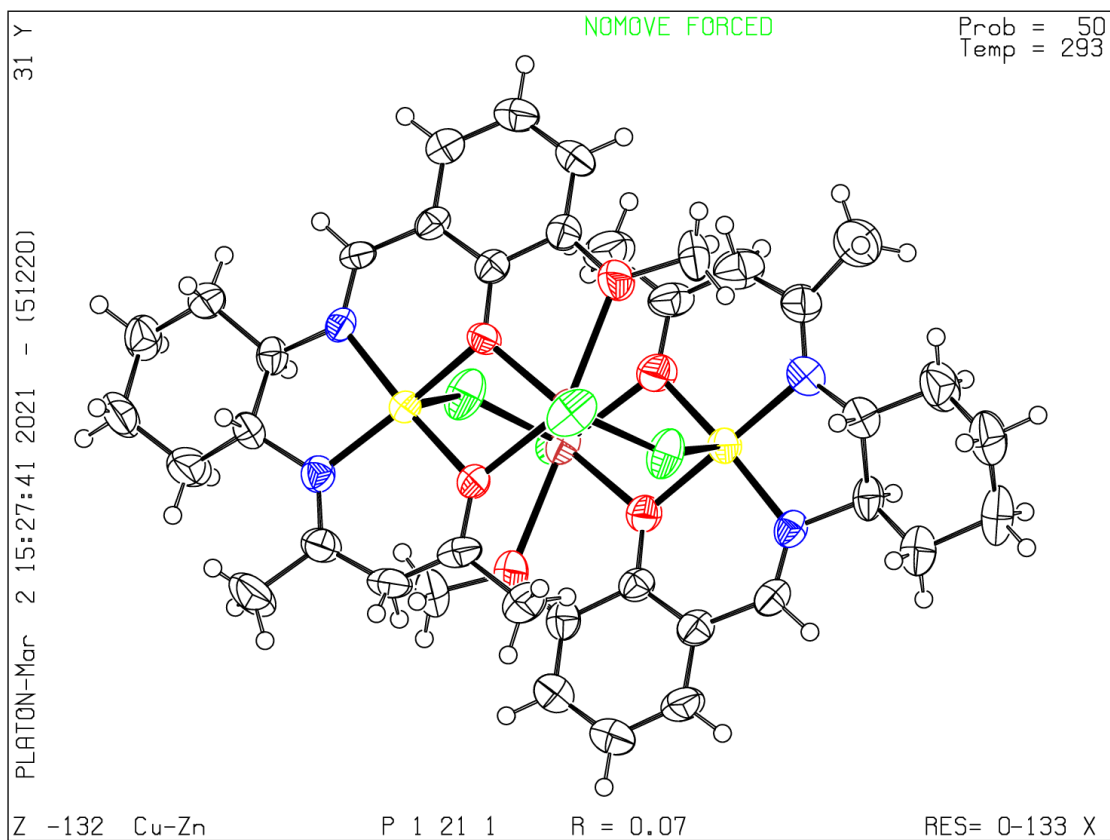

Supplement: s1 [file s1]
