# Supplementary material for: A Highly Selective Turn-On Fluorescent Probe for the Detection of Zinc
Source: MDPI journal article supplement (doi:10.3390/molecules26133825), 2021-06-23

# checkCIF/PLATON report

Structure factors have been supplied for datablock(s) L-Cu

THIS REPORT IS FOR GUIDANCE ONLY. IF USED AS PART OF A REVIEW PROCEDURE FOR PUBLICATION, IT SHOULD NOT REPLACE THE EXPERTISE OF AN EXPERIENCED CRYSTALLOGRAPHIC REFEREE.

No syntax errors found.      CIF dictionary      Interpreting this report

## Datablock: L-Cu

---

|                 |                        |                        |             |
|-----------------|------------------------|------------------------|-------------|
| Bond precision: | C-C = 0.0055 A         | Wavelength=0.71073     |             |
| Cell:           | a=7.6261(8)            | b=12.8842(15)          | c=19.144(2) |
|                 | alpha=90               | beta=90                | gamma=90    |
| Temperature:    | 302 K                  |                        |             |
|                 | Calculated             | Reported               |             |
| Volume          | 1881.0(4)              | 1881.1(4)              |             |
| Space group     | P 21 21 21             | P 21 21 21             |             |
| Hall group      | P 2ac 2ab              | P 2ac 2ab              |             |
| Moiety formula  | C19 H24 Cu N2 O3, H2 O | C19 H24 Cu N2 O3, H2 O |             |
| Sum formula     | C19 H26 Cu N2 O4       | C19 H24 Cu N3 O3       |             |
| Mr              | 409.97                 | 405.95                 |             |
| Dx,g cm-3       | 1.448                  | 1.433                  |             |
| Z               | 4                      | 4                      |             |
| Mu (mm-1)       | 1.187                  | 1.184                  |             |
| F000            | 860.0                  | 848.0                  |             |
| F000'           | 861.59                 |                        |             |
| h,k,lmax        | 10,17,25               | 10,17,25               |             |
| Nref            | 4697[ 2679]            | 4634                   |             |
| Tmin,Tmax       | 0.762,0.808            | 0.489,0.746            |             |
| Tmin'           | 0.762                  |                        |             |

Correction method= # Reported T Limits: Tmin=0.489 Tmax=0.746  
AbsCorr = MULTI-SCAN

Data completeness= 1.73/0.99      Theta(max)= 28.348

R(reflections)= 0.0382( 3547)      wR2(reflections)= 0.0761( 4634)

S = 1.029      Npar= 241

---

The following ALERTS were generated. Each ALERT has the format  
**test-name\_ALERT\_alert-type\_alert-level.**  
Click on the hyperlinks for more details of the test.

---

**Alert level B**

PLAT035\_ALERT\_1\_B \_chemical\_absolute\_configuration Info Not Given Please Do !

---

**Alert level C**

PLAT041\_ALERT\_1\_C Calc. and Reported SumFormula Strings Differ Please Check  
PLAT043\_ALERT\_1\_C Calculated and Reported Mol. Weight Differ by .. 4.02 Check  
PLAT068\_ALERT\_1\_C Reported F000 Differs from Calcd (or Missing)... Please Check  
PLAT911\_ALERT\_3\_C Missing FCF Refl Between Thmin & STh/L= 0.600 2 Report

---

**Alert level G**

FORMU01\_ALERT\_1\_G There is a discrepancy between the atom counts in the  
\_chemical\_formula\_sum and \_chemical\_formula\_moiety. This is  
usually due to the moiety formula being in the wrong format.  
Atom count from \_chemical\_formula\_sum: C19 H24 Cu1 N3 O3  
Atom count from \_chemical\_formula\_moiety: C19 H26 Cu1 N2 O4  
FORMU01\_ALERT\_2\_G There is a discrepancy between the atom counts in the  
\_chemical\_formula\_sum and the formula from the \_atom\_site\* data.  
Atom count from \_chemical\_formula\_sum: C19 H24 Cu1 N3 O3  
Atom count from the \_atom\_site data: C19 H26 Cu1 N2 O4  
CELLZ01\_ALERT\_1\_G Difference between formula and atom\_site contents detected.  
CELLZ01\_ALERT\_1\_G ALERT: Large difference may be due to a  
symmetry error - see SYMMG tests  
From the CIF: \_cell\_formula\_units\_Z 4  
From the CIF: \_chemical\_formula\_sum C19 H24 Cu N3 O3  
TEST: Compare cell contents of formula and atom\_site data

| atom | Z*formula | cif sites | diff  |
|------|-----------|-----------|-------|
| C    | 76.00     | 76.00     | 0.00  |
| H    | 96.00     | 104.00    | -8.00 |
| Cu   | 4.00      | 4.00      | 0.00  |
| N    | 12.00     | 8.00      | 4.00  |
| O    | 12.00     | 16.00     | -4.00 |

PLAT007\_ALERT\_5\_G Number of Unrefined Donor-H Atoms ..... 2 Report  
PLAT720\_ALERT\_4\_G Number of Unusual/Non-Standard Labels ..... 2 Note  
PLAT791\_ALERT\_4\_G Model has Chirality at C9 (Sohnke SpGr) R Verify  
PLAT791\_ALERT\_4\_G Model has Chirality at C14 (Sohnke SpGr) R Verify  
PLAT883\_ALERT\_1\_G No Info/Value for \_atom\_sites\_solution\_primary . Please Do !  
PLAT910\_ALERT\_3\_G Missing # of FCF Reflection(s) Below Theta(Min). 3 Note  
PLAT912\_ALERT\_4\_G Missing # of FCF Reflections Above STh/L= 0.600 7 Note  
PLAT913\_ALERT\_3\_G Missing # of Very Strong Reflections in FCF .... 1 Note  
PLAT941\_ALERT\_3\_G Average HKL Measurement Multiplicity ..... 3.4 Low  
PLAT978\_ALERT\_2\_G Number C-C Bonds with Positive Residual Density. 0 Info  
PLAT992\_ALERT\_5\_G Repd & Actual \_reflns\_number\_gt Values Differ by 2 Check

---

0 **ALERT level A** = Most likely a serious problem - resolve or explain  
1 **ALERT level B** = A potentially serious problem, consider carefully  
4 **ALERT level C** = Check. Ensure it is not caused by an omission or oversight  
15 **ALERT level G** = General information/check it is not something unexpected

8 ALERT type 1 CIF construction/syntax error, inconsistent or missing data  
2 ALERT type 2 Indicator that the structure model may be wrong or deficient  
4 ALERT type 3 Indicator that the structure quality may be low  
4 ALERT type 4 Improvement, methodology, query or suggestion  
2 ALERT type 5 Informative message, check

---

---

It is advisable to attempt to resolve as many as possible of the alerts in all categories. Often the minor alerts point to easily fixed oversights, errors and omissions in your CIF or refinement strategy, so attention to these fine details can be worthwhile. In order to resolve some of the more serious problems it may be necessary to carry out additional measurements or structure refinements. However, the purpose of your study may justify the reported deviations and the more serious of these should normally be commented upon in the discussion or experimental section of a paper or in the "special\_details" fields of the CIF. checkCIF was carefully designed to identify outliers and unusual parameters, but every test has its limitations and alerts that are not important in a particular case may appear. Conversely, the absence of alerts does not guarantee there are no aspects of the results needing attention. It is up to the individual to critically assess their own results and, if necessary, seek expert advice.

### **Publication of your CIF in IUCr journals**

A basic structural check has been run on your CIF. These basic checks will be run on all CIFs submitted for publication in IUCr journals (*Acta Crystallographica*, *Journal of Applied Crystallography*, *Journal of Synchrotron Radiation*); however, if you intend to submit to *Acta Crystallographica Section C* or *E* or *IUCrData*, you should make sure that full publication checks are run on the final version of your CIF prior to submission.

### **Publication of your CIF in other journals**

Please refer to the *Notes for Authors* of the relevant journal for any special instructions relating to CIF submission.

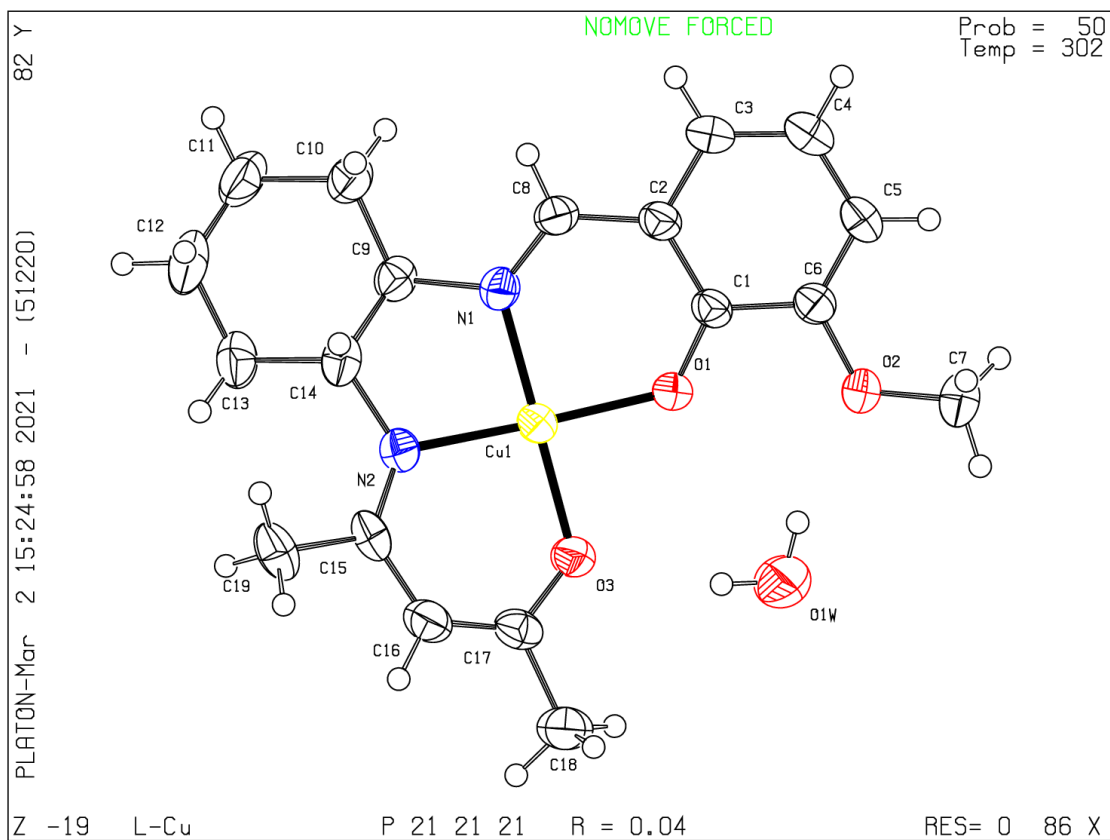

Supplement: s1 [file s1]
