# Supplementary material for: A Highly Selective Turn-On Fluorescent Probe for the Detection of Zinc
Source: MDPI journal article supplement (doi:10.3390/molecules26133825), 2021-06-23

# checkCIF/PLATON report

Structure factors have been supplied for datablock(s) 1\_L

THIS REPORT IS FOR GUIDANCE ONLY. IF USED AS PART OF A REVIEW PROCEDURE FOR PUBLICATION, IT SHOULD NOT REPLACE THE EXPERTISE OF AN EXPERIENCED CRYSTALLOGRAPHIC REFEREE.

No syntax errors found.      CIF dictionary      Interpreting this report

## Datablock: 1\_L

---

Bond precision:    C-C = 0.0148 A                      Wavelength=0.71073

Cell:                      a=17.989(2)              b=17.989(2)              c=12.862(2)  
                            alpha=90              beta=90              gamma=90  
Temperature:              293 K

|                | Calculated                      | Reported              |
|----------------|---------------------------------|-----------------------|
| Volume         | 4162.2(11)                      | 4162.2(11)            |
| Space group    | P 42 21 2                       | P 42 21 2             |
| Hall group     | P 4n 2n                         | P 4n 2n               |
| Moiety formula | 2(C19 H27 N2 O3), O [+ solvent] | C19 H27 N2 O3, 0.5(O) |
| Sum formula    | C38 H54 N4 O7 [+ solvent]       | C19 H27 N2 O3.50      |
| Mr             | 678.85                          | 339.42                |
| Dx,g cm-3      | 1.083                           | 1.083                 |
| Z              | 4                               | 8                     |
| Mu (mm-1)      | 0.075                           | 0.075                 |
| F000           | 1464.0                          | 1464.0                |
| F000'          | 1464.66                         |                       |
| h,k,lmax       | 21,21,15                        | 21,21,14              |
| Nref           | 3675[ 2138]                     | 3594                  |
| Tmin,Tmax      | 0.987,0.991                     | 0.607,0.746           |
| Tmin'          | 0.983                           |                       |

Correction method= # Reported T Limits: Tmin=0.607 Tmax=0.746  
AbsCorr = MULTI-SCAN

Data completeness= 1.68/0.98                      Theta(max)= 24.992

R(reflections)= 0.1018( 1749)              wR2(reflections)= 0.3231( 3594)

S = 1.024                      Npar= 226

---

The following ALERTS were generated. Each ALERT has the format

**test-name\_ALERT\_alert-type\_alert-level.**

Click on the hyperlinks for more details of the test.

---

### Alert level B

DIFMN02\_ALERT\_2\_B The minimum difference density is < -0.1\*ZMAX\*1.00  
    \_refine\_diff\_density\_min given = -0.818  
    Test value = -0.800

RINTA01\_ALERT\_3\_B The value of Rint is greater than 0.18  
    Rint given 0.192

PLAT020\_ALERT\_3\_B The Value of Rint is Greater Than 0.12 ..... 0.192 Report

PLAT035\_ALERT\_1\_B \_chemical\_absolute\_configuration Info Not Given Please Do !

PLAT098\_ALERT\_2\_B Large Reported Min. (Negative) Residual Density -0.82 eA-3

PLAT306\_ALERT\_2\_B Isolated Oxygen Atom (H-atoms Missing ?) ..... 04 Check

PLAT340\_ALERT\_3\_B Low Bond Precision on C-C Bonds ..... 0.01482 Ang.

PLAT420\_ALERT\_2\_B D-H Without Acceptor O2 --H2A . Please Check

---

### Alert level C

ABSTY02\_ALERT\_1\_C An \_exptl\_absorpt\_correction\_type has been given without  
    a literature citation. This should be contained in the  
    \_exptl\_absorpt\_process\_details field.  
    Absorption correction given as multi-scan

DIFMN03\_ALERT\_1\_C The minimum difference density is < -0.1\*ZMAX\*0.75  
    The relevant atom site should be identified.

STRVA01\_ALERT\_4\_C Flack parameter is too small  
    From the CIF: \_refine\_ls\_abs\_structure\_Flack -2.000  
    From the CIF: \_refine\_ls\_abs\_structure\_Flack\_su 6.000

PLAT026\_ALERT\_3\_C Ratio Observed / Unique Reflections (too) Low .. 49% Check

PLAT029\_ALERT\_3\_C \_diffrn\_measured\_fraction\_theta\_full value Low . 0.974 Why?

PLAT084\_ALERT\_3\_C High wR2 Value (i.e. > 0.25) ..... 0.32 Report

PLAT230\_ALERT\_2\_C Hirshfeld Test Diff for O2 --C9 . 5.3 s.u.

PLAT234\_ALERT\_4\_C Large Hirshfeld Difference C8 --C9 . 0.16 Ang.

PLAT242\_ALERT\_2\_C Low 'MainMol' Ueq as Compared to Neighbors of C4 Check

PLAT260\_ALERT\_2\_C Large Average Ueq of Residue Including O4 0.160 Check

PLAT416\_ALERT\_2\_C Short Intra D-H..H-D H2 ..H2A . 1.94 Ang.  
    x,y,z = 1\_555 Check

PLAT911\_ALERT\_3\_C Missing FCF Refl Between Thmin & STh/L= 0.594 42 Report

PLAT918\_ALERT\_3\_C Reflection(s) with I(obs) much Smaller I(calc) . 2 Check

---

### Alert level G

PLAT002\_ALERT\_2\_G Number of Distance or Angle Restraints on AtSite 2 Note

PLAT007\_ALERT\_5\_G Number of Unrefined Donor-H Atoms ..... 3 Report

PLAT032\_ALERT\_4\_G Std. Uncertainty on Flack Parameter Value High . 6.000 Report

PLAT042\_ALERT\_1\_G Calc. and Reported MoietyFormula Strings Differ Please Check

PLAT045\_ALERT\_1\_G Calculated and Reported Z Differ by a Factor ... 0.50 Check

PLAT072\_ALERT\_2\_G SHELXL First Parameter in WGHT Unusually Large 0.20 Report

PLAT172\_ALERT\_4\_G The CIF-Embedded .res File Contains DFIX Records 1 Report

PLAT199\_ALERT\_1\_G Reported \_cell\_measurement\_temperature ..... (K) 293 Check

PLAT200\_ALERT\_1\_G Reported \_diffrn\_ambient\_temperature ..... (K) 293 Check

PLAT304\_ALERT\_4\_G Non-Integer Number of Atoms in ..... (Resd 2 ) 0.50 Check

PLAT605\_ALERT\_4\_G Largest Solvent Accessible VOID in the Structure 253 A\*\*3

PLAT791\_ALERT\_4\_G Model has Chirality at C5 (Sohnke SpGr) R Verify

PLAT791\_ALERT\_4\_G Model has Chirality at C6 (Sohnke SpGr) R Verify

PLAT860\_ALERT\_3\_G Number of Least-Squares Restraints ..... 1 Note

PLAT869\_ALERT\_4\_G ALERTS Related to the Use of SQUEEZE Suppressed ! Info

PLAT870\_ALERT\_4\_G ALERTS Related to Twinning Effects Suppressed .. ! Info

PLAT883\_ALERT\_1\_G No Info/Value for \_atom\_sites\_solution\_primary . Please Do !

PLAT910\_ALERT\_3\_G Missing # of FCF Reflection(s) Below Theta(Min). 3 Note

|                                                                    |              |
|--------------------------------------------------------------------|--------------|
| PLAT913_ALERT_3_G Missing # of Very Strong Reflections in FCF .... | 1 Note       |
| PLAT916_ALERT_2_G Hooft y and Flack x Parameter Values Differ by . | 0.50 Check   |
| PLAT961_ALERT_5_G Dataset Contains no Negative Intensities .....   | Please Check |

---

|    |                      |                                                              |
|----|----------------------|--------------------------------------------------------------|
| 0  | <b>ALERT level A</b> | = Most likely a serious problem - resolve or explain         |
| 8  | <b>ALERT level B</b> | = A potentially serious problem, consider carefully          |
| 13 | <b>ALERT level C</b> | = Check. Ensure it is not caused by an omission or oversight |
| 21 | <b>ALERT level G</b> | = General information/check it is not something unexpected   |

  

|    |              |                                                              |
|----|--------------|--------------------------------------------------------------|
| 8  | ALERT type 1 | CIF construction/syntax error, inconsistent or missing data  |
| 11 | ALERT type 2 | Indicator that the structure model may be wrong or deficient |
| 11 | ALERT type 3 | Indicator that the structure quality may be low              |
| 10 | ALERT type 4 | Improvement, methodology, query or suggestion                |
| 2  | ALERT type 5 | Informative message, check                                   |

---

It is advisable to attempt to resolve as many as possible of the alerts in all categories. Often the minor alerts point to easily fixed oversights, errors and omissions in your CIF or refinement strategy, so attention to these fine details can be worthwhile. In order to resolve some of the more serious problems it may be necessary to carry out additional measurements or structure refinements. However, the purpose of your study may justify the reported deviations and the more serious of these should normally be commented upon in the discussion or experimental section of a paper or in the "special\_details" fields of the CIF. checkCIF was carefully designed to identify outliers and unusual parameters, but every test has its limitations and alerts that are not important in a particular case may appear. Conversely, the absence of alerts does not guarantee there are no aspects of the results needing attention. It is up to the individual to critically assess their own results and, if necessary, seek expert advice.

### Publication of your CIF in IUCr journals

A basic structural check has been run on your CIF. These basic checks will be run on all CIFs submitted for publication in IUCr journals (*Acta Crystallographica*, *Journal of Applied Crystallography*, *Journal of Synchrotron Radiation*); however, if you intend to submit to *Acta Crystallographica Section C* or *E* or *IUCrData*, you should make sure that full publication checks are run on the final version of your CIF prior to submission.

### Publication of your CIF in other journals

Please refer to the *Notes for Authors* of the relevant journal for any special instructions relating to CIF submission.

---

**PLATON version of 05/12/2020; check.def file version of 05/12/2020**

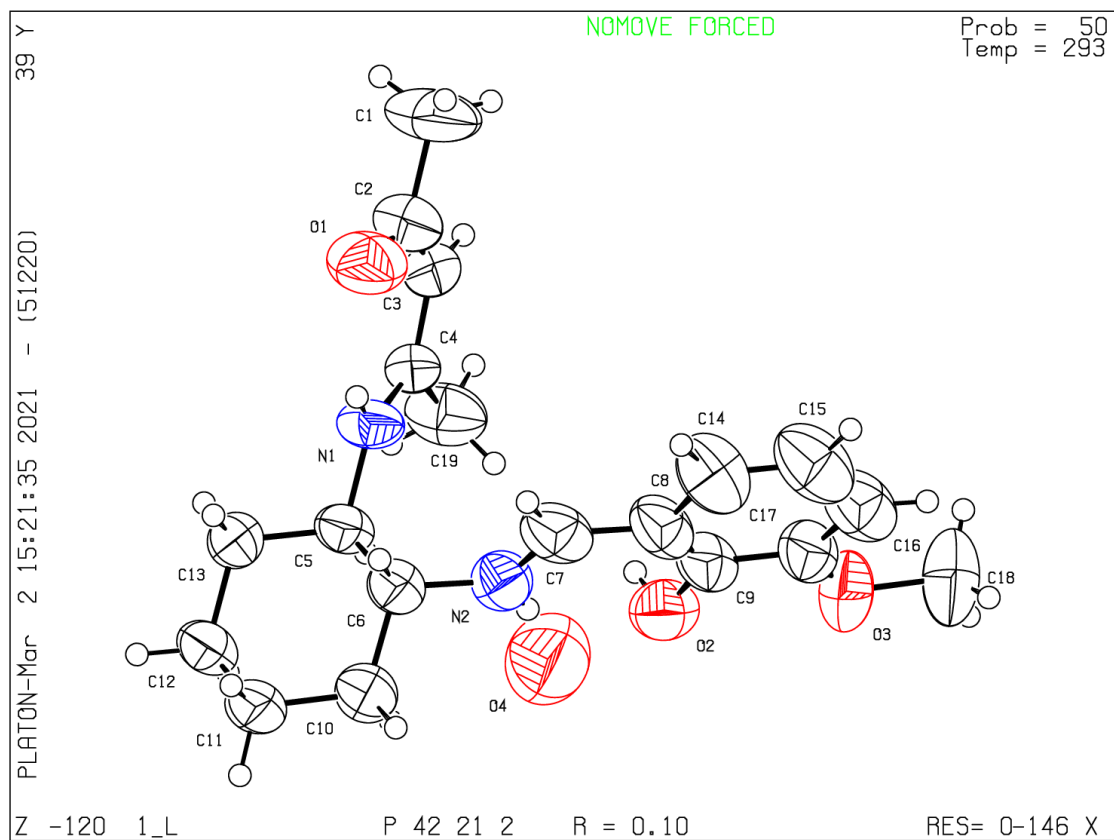

Supplement: s1 [file s1]
