# Supplementary material for: A Highly Selective Turn-On Fluorescent Probe for the Detection of Zinc
Source: MDPI journal article supplement (doi:10.3390/molecules26133825), 2021-06-23
Supplement: s1 [file s1]

Supporting Information

# A Highly Selective Turn-On Fluorescent Probe for the Detection of Zinc

Ling-Yi Shen <sup>1,2,†</sup>, Xiao-Li Chen <sup>2,†</sup>, Xian-Jiong Yang <sup>1,2,\*</sup>, Hong Xu <sup>2</sup>, Ya-Li Huang <sup>2</sup>, Xing Zhang <sup>2</sup>, Carl Redshaw <sup>3</sup> and Qi-Long Zhang <sup>1,2,\*</sup>

<sup>1</sup> School of Public Health, the key Laboratory of Environmental Pollution Monitoring and Disease Control, Ministry of Education, Guizhou Medical University, Guiyang 550014, China; shenly@stumail.nwu.edu.cn

<sup>2</sup> School of Basic Medical Science, Guizhou Medical University, Guiyang 550004, China; C13885297112@163.com (X.C.); xuhong@gmc.edu.cn (H.X.); ylh6401@gmc.edu.cn (Y.-L.H.); zhangxing11207115@126.com (X.Z.)

<sup>3</sup> Department of Chemistry, University of Hull, Cottingham Road, Hull, Yorkshire HU6 7RX, UK; c.redshaw@hull.ac.uk

\* Correspondence: yangxianjiong@gmc.edu.cn (X.-J.Y.); sciqzhang@gmc.edu.cn (Q.-L.Z.); Fax: +86-0851-88174017 (Q.-L.Z.)

† These authors contributed equally to this work.

## Contents:

|                                                                                   |          |
|-----------------------------------------------------------------------------------|----------|
| <sup>1</sup> H-NMR spectrum of probe L                                            | S1       |
| <sup>13</sup> C-NMR spectrum of probe L                                           | S2       |
| HR ESI-MS spectrum of probe L                                                     | S3       |
| Absorbance of L as a function of [Zn <sup>2+</sup> ]/[L].                         | S4       |
| Job's plot of probe L with Zn <sup>2+</sup> .                                     | S5       |
| <sup>1</sup> H-NMR spectra of probe L with 0–1 equiv. of ZnCl <sub>2</sub>        | S6       |
| Crystallographic data and refinement details.                                     | Table S1 |
| Selected bond lengths and bond angles for complex L, Cu-complex and Cu-Zn complex | Table S2 |

## NMR spectrum

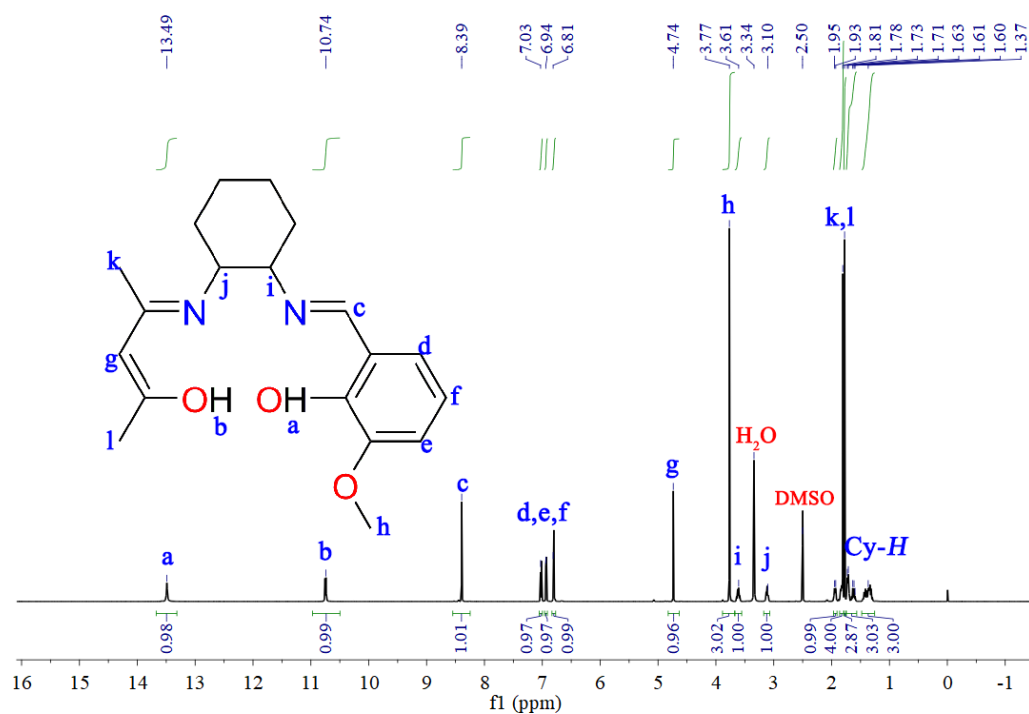Figure S1.  $^1\text{H}$ -NMR spectrum of probe L (600 MHz,  $\text{DMSO}-d_6$ , 298 K).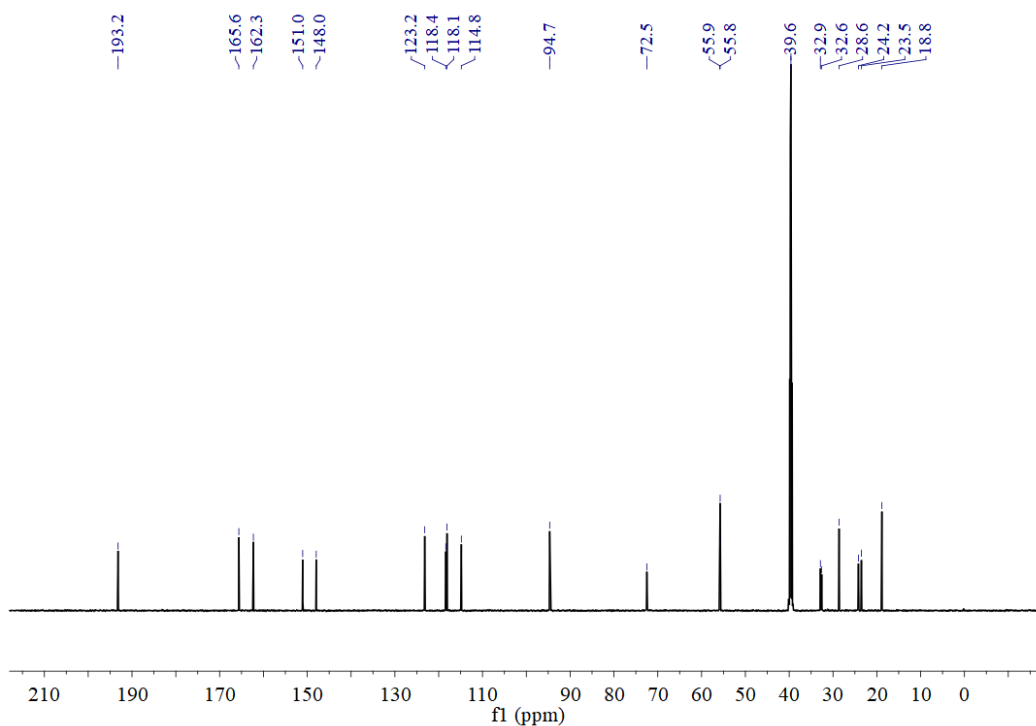Figure S2.  $^{13}\text{C}$ -NMR spectrum of probe L in (150.9 MHz,  $\text{DMSO}-d_6$ , 298 K).

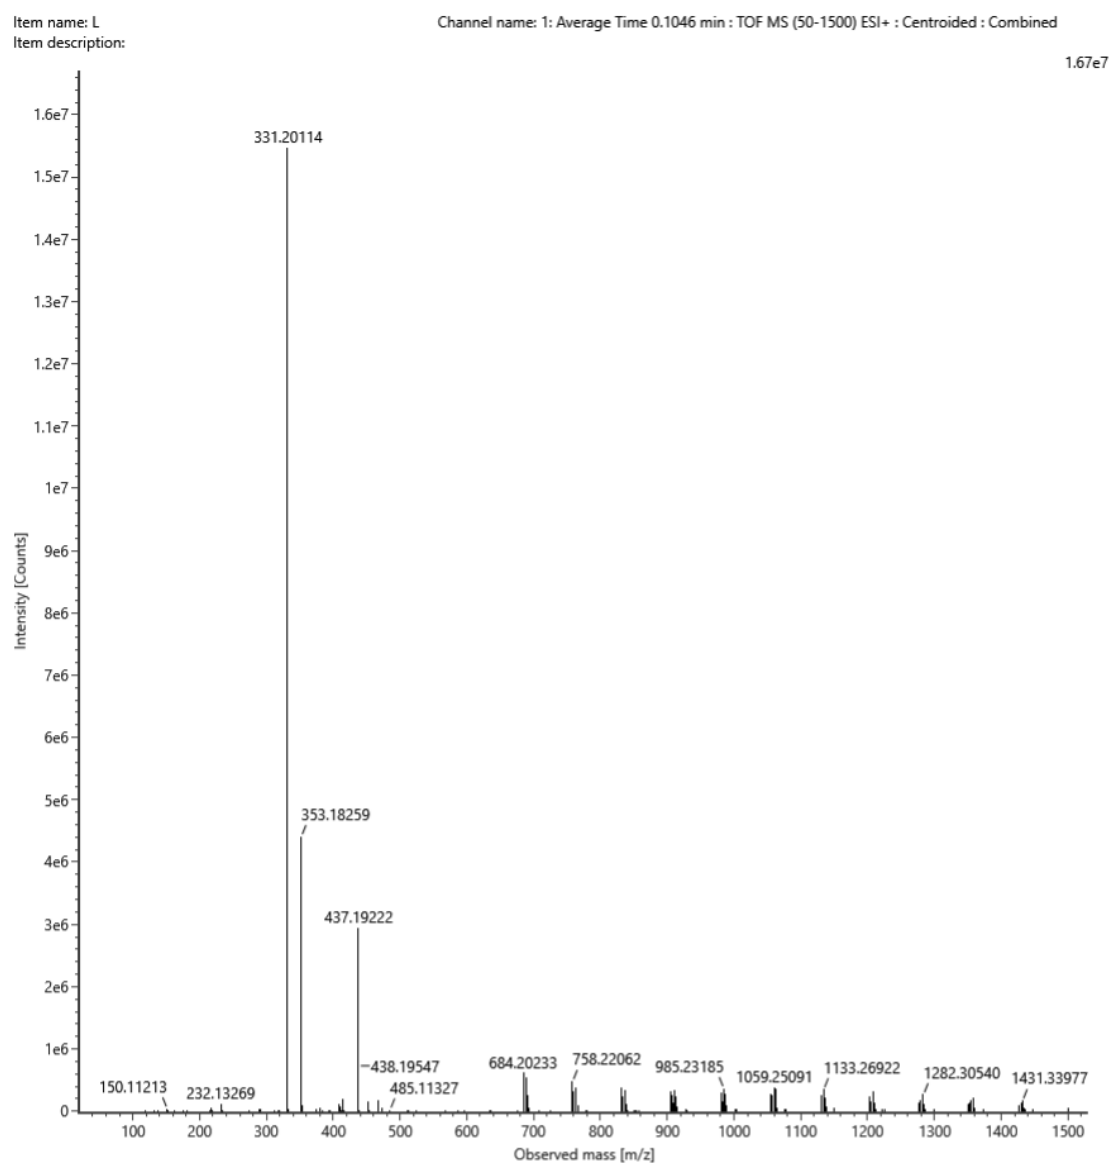

**Figure S3.** HR ESI-MS spectrum of probe **L**. The  $m/z$  peaks at 331.2011 and 353.1826 correspond to  $[M + H]^+$  and  $[M + Na]^+$ .

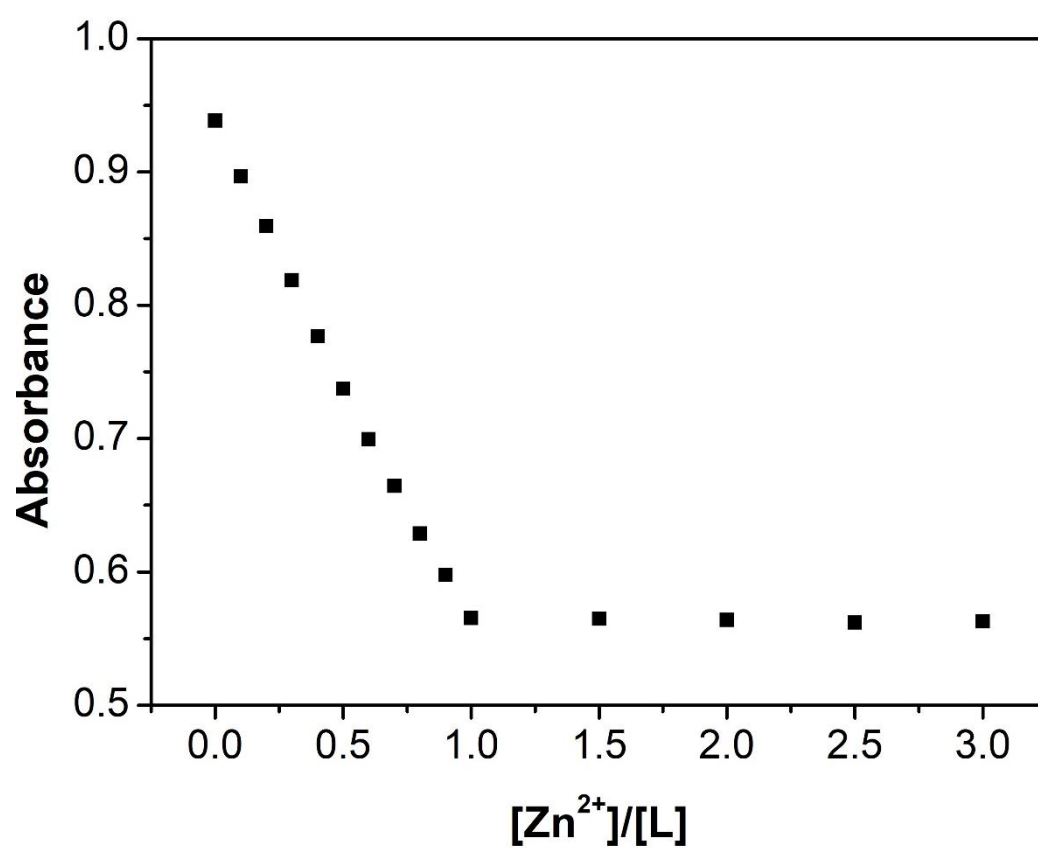

Figure S4. Absorbance of L at 312 nm as a function of  $[Zn^{2+}]/[L]$ .

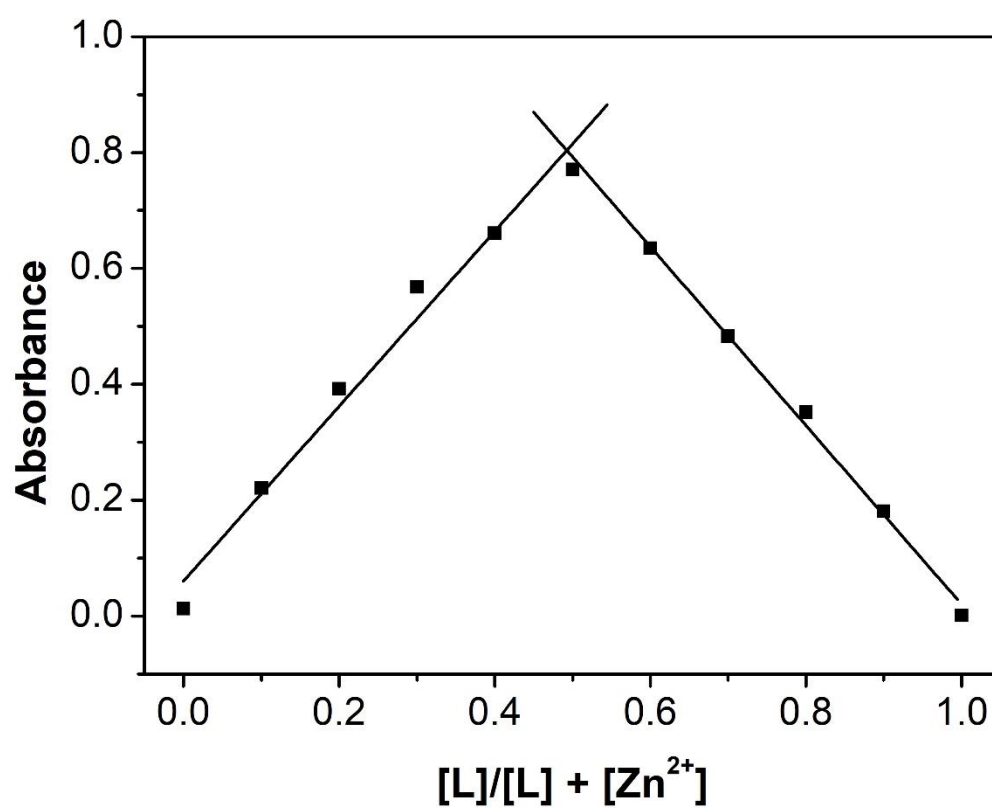

Figure S5. Job's plot of probe L with  $Zn^{2+}$ .

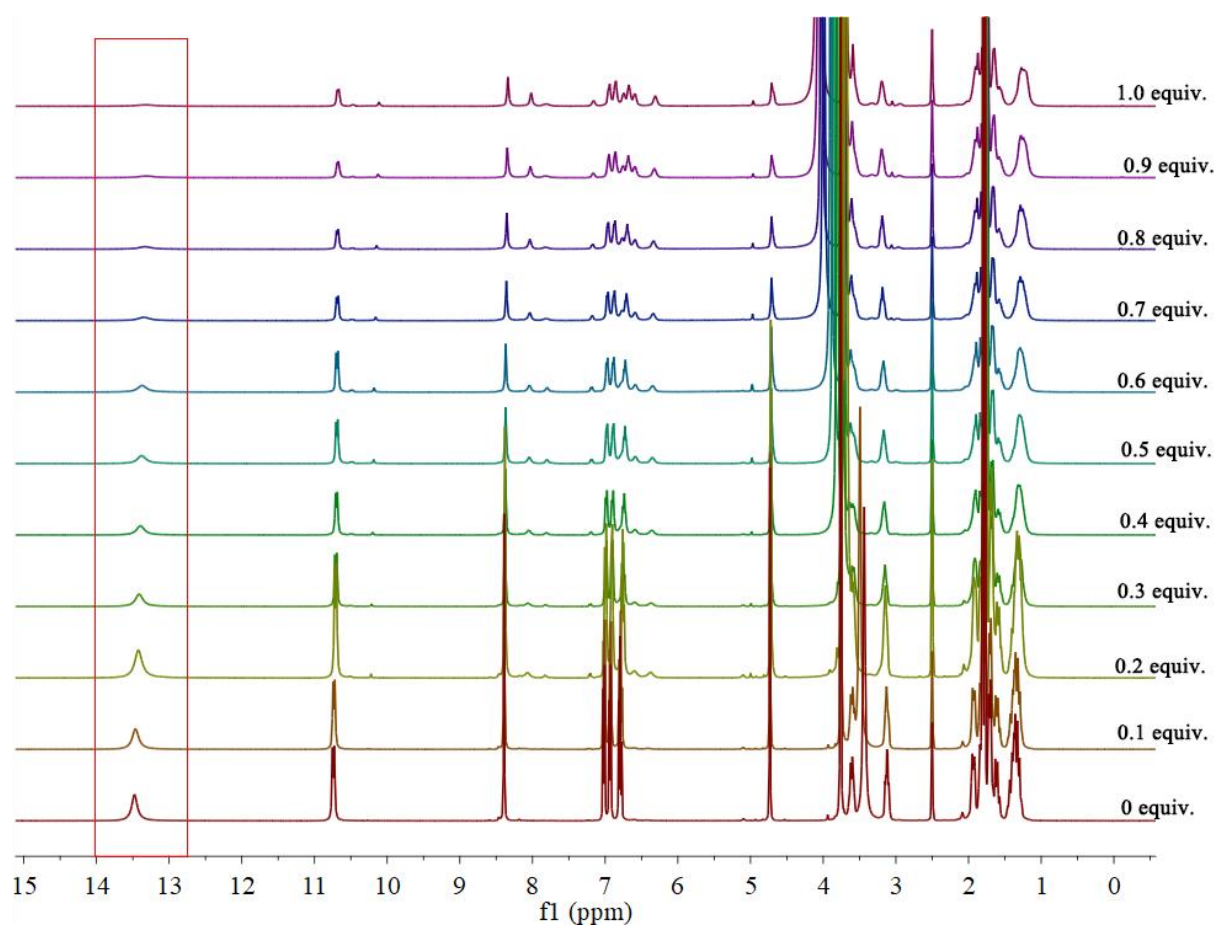

**Figure S6.** <sup>1</sup>H-NMR spectra of probe L with 0–1 equiv. of ZnCl<sub>2</sub> in DMSO-*d*<sub>6</sub>.

## X-ray crystallography Analysis

Table S1. Crystallographic data and refinement details for L, Cu-complex and Cu-Zn complex.

| Complex                                                                                           | L                                                                | Cu-complex                                                      | Cu-Zn complex                                                                                                 |
|---------------------------------------------------------------------------------------------------|------------------------------------------------------------------|-----------------------------------------------------------------|---------------------------------------------------------------------------------------------------------------|
| CCDC Number                                                                                       | 2067620                                                          | 2067621                                                         | 2067622                                                                                                       |
| Formula                                                                                           | C <sub>19</sub> H <sub>27</sub> N <sub>2</sub> O <sub>3.50</sub> | C <sub>19</sub> H <sub>24</sub> CuN <sub>3</sub> O <sub>3</sub> | C <sub>38</sub> H <sub>50</sub> Cl <sub>4</sub> Cu <sub>2</sub> N <sub>4</sub> O <sub>6</sub> Zn <sub>2</sub> |
| Formula weight                                                                                    | 339.42                                                           | 405.95                                                          | 1058.44                                                                                                       |
| Crystal system,                                                                                   | Tetragonal                                                       | Orthorhombic                                                    | Monoclinic                                                                                                    |
| space group                                                                                       | <i>P</i> 4 <sub>2</sub> 2 <sub>1</sub> 2                         | <i>P</i> 2 <sub>1</sub> 2 <sub>1</sub> 2 <sub>1</sub>           | <i>P</i> 2 <sub>1</sub>                                                                                       |
| <i>a</i> /Å                                                                                       | 17.989(2)                                                        | 7.6261(8)                                                       | 9.9812(11)                                                                                                    |
| <i>b</i> /Å                                                                                       | 17.989(2)                                                        | 12.8842(15)                                                     | 19.966(2)                                                                                                     |
| <i>c</i> /Å                                                                                       | 12.862(2)                                                        | 19.144(2)                                                       | 11.0609(12)                                                                                                   |
| $\alpha$ /deg                                                                                     | 90                                                               | 90                                                              | 90                                                                                                            |
| $\beta$ /deg                                                                                      | 90                                                               | 90                                                              | 105.840(4)                                                                                                    |
| $\gamma$ /deg                                                                                     | 90                                                               | 90                                                              | 90                                                                                                            |
| <i>V</i> /Å <sup>3</sup>                                                                          | 4162.2(11)                                                       | 1881.1(4)                                                       | 2120.6(4)                                                                                                     |
| <i>Z</i>                                                                                          | 8                                                                | 4                                                               | 2                                                                                                             |
| <i>D</i> <sub>calcd</sub> /g cm <sup>−3</sup>                                                     | 1.083                                                            | 1.433                                                           | 1.658                                                                                                         |
| <i>F</i> (000)                                                                                    | 1464                                                             | 848                                                             | 1080                                                                                                          |
| $\mu$ /mm <sup>−1</sup>                                                                           | 0.075                                                            | 1.184                                                           | 2.408                                                                                                         |
| $\theta$ range                                                                                    | 2.264–24.992                                                     | 2.875–28.348                                                    | 1.914–24.996                                                                                                  |
| <i>R</i> <sub>int</sub>                                                                           | 0.1916                                                           | 0.0351                                                          | 0.1772                                                                                                        |
| Final <i>R</i> <sub>1</sub> , <i>wR</i> <sub>2</sub> values ( <i>I</i> > 2 $\sigma$ ( <i>I</i> )) | 0.1018, 0.2793                                                   | 0.0382, 0.0668                                                  | 0.0718, 0.1716                                                                                                |
| <i>R</i> <sub>1</sub> , <i>wR</i> <sub>2</sub> (all data)                                         | 0.2233, 0.3231                                                   | 0.0657, 0.0761                                                  | 0.0830, 0.1799                                                                                                |
| GOF ( <i>F</i> <sup>2</sup> )                                                                     | 1.024                                                            | 1.029                                                           | 0.999                                                                                                         |

Table S2. Selected bond lengths(nm) and bond angles (°) for complex L, Cu-complex and Cu-Zn complex.

| L             |            |           |           |            |           |
|---------------|------------|-----------|-----------|------------|-----------|
| C1–N1         | 1.489(10)  | C6–N2     | 1.466(11) | C15–C16    | 1.348(15) |
| N1–C17        | 1.319(10)  | N2–C7     | 1.310(12) | C15–C16    | 1.348(15) |
| C15–O1        | 1.293(14)  |           |           |            |           |
| C1–N1–C17     | 127.0(7)   | C6–N2–C7  | 120.2(8)  | N1–C17–C16 | 121.5(9)  |
| N2–C7–C8      | 121.9(10)  |           |           |            |           |
| Cu-complex    |            |           |           |            |           |
| C1–N1         | 1.480(5)   | C6–N2     | 1.460(5)  | C15–C16    | 1.352(6)  |
| N1–C17        | 1.309(5)   | N2–C7     | 1.290(5)  | N1–Cu1     | 1.959(3)  |
| N2–Cu1        | 1.916(3)   | O1–Cu1    | 1.913(3)  | O2–Cu1     | 1.909(3)  |
| C15–O1        | 1.292(5)   |           |           |            |           |
| C1–N1–C17     | 123.2(3)   | C6–N2–C7  | 123.4(3)  | N1–Cu1–O1  | 95.25(13) |
| C1–N1–Cu1     | 112.6(2)   | C6–N2–Cu1 | 110.1(2)  | N1–Cu1–N2  | 85.22(13) |
| N2–Cu1–O2     | 92.44(12)  | O1–Cu1–O2 | 87.78(11) |            |           |
| Cu-Zn complex |            |           |           |            |           |
| C1–N1         | 1.472(11)  | C6–N2     | 1.479(10) | C15–C16    | 1.372(15) |
| N1–C17        | 1.297(12)  | N2–C7     | 1.258(10) | N1–Cu1     | 1.946(7)  |
| N2–Cu1        | 1.923(7)   | C15–O1    | 1.267(11) | O1–Cu1     | 1.917(6)  |
| O2–Cu1        | 1.934(6)   | O1–Zn1    | 2.146(6)  | O2–Zn1     | 2.002(6)  |
| O3–Zn1        | 2.441(7)   | Cl1–Zn1   | 2.223(3)  | Cl2–Zn1    | 2.219(3)  |
| Cu1.....Zn1   | 3.1062(13) |           |           |            |           |

---

|           |         |           |         |            |            |
|-----------|---------|-----------|---------|------------|------------|
| N1–Cu1–O1 | 97.4(3) | N2–Cu2–O2 | 93.4(3) | N1–Cu1–N2  | 87.2(3)    |
| O1–Cu1–O2 | 81.5(2) | O1–Zn–O2  | 74.5(2) | Cl1–Zn–Cl2 | 116.96(11) |

---
