# Supplementary material for: A Highly Selective Turn-On Fluorescent Probe for the Detection of Zinc
Source: Molecules. 2021 Jun 23;26(13):3825. doi: 10.3390/molecules26133825 (PMC8270291; doi:10.3390/molecules26133825)
Supplement: Supplementary file 1 [file molecules-26-03825-s001.zip]

Archive with 8 entries (7 files):
- Crystal/
- Crystal/checkcif-Cu.pdf
- Crystal/checkcif-L.pdf
- Crystal/checkcif-Zn.pdf
- Crystal/Cu-Zn.cif
- Crystal/L-Cu.cif
- Crystal/L.cif
- molecules-1251598-supplementary.pdf
