# Supplementary material for: A Highly Selective Turn-On Fluorescent Probe for the Detection of Zinc
Source: Molecules. 2021 Jun 23;26(13):3825. doi: 10.3390/molecules26133825 (PMC8270291; doi:10.3390/molecules26133825)
Supplement: Supplementary file 1 [file molecules-26-03825-s001.zip › Crystal/Cu-Zn.cif]

data_Cu-Zn
_audit_creation_date               2021-03-02
_audit_creation_method
;
Olex2 1.2
(compiled 2018.05.29 svn.r3508 for OlexSys, GUI svn.r5506)
;
_shelx_SHELXL_version_number       '2014/7'
_audit_contact_author_address      ?
_audit_contact_author_email        ?
_audit_contact_author_name         ''
_audit_contact_author_phone        ?
_publ_contact_author_id_orcid      ?
_publ_section_references
;
Dolomanov, O.V., Bourhis, L.J., Gildea, R.J, Howard, J.A.K. & Puschmann, H.
 (2009), J. Appl. Cryst. 42, 339-341.

Sheldrick, G.M. (2008). Acta Cryst. A64, 112-122.
;
_chemical_name_common              ?
_chemical_name_systematic
;
 ?
;
_chemical_formula_moiety           '2(C19 H25 Cl2 Cu N2 O3 Zn)'
_chemical_formula_sum              'C38 H50 Cl4 Cu2 N4 O6 Zn2'
_chemical_formula_weight           1058.44
_chemical_absolute_configuration   unk
_chemical_melting_point            ?
loop_
  _atom_type_symbol
  _atom_type_description
  _atom_type_scat_dispersion_real
  _atom_type_scat_dispersion_imag
  _atom_type_scat_source
 'C' 'C' 0.0033 0.0016 'International Tables Vol C Tables 4.2.6.8 and 6.1.1.4'
 'H' 'H' 0.0000 0.0000 'International Tables Vol C Tables 4.2.6.8 and 6.1.1.4'
 'Cl' 'Cl' 0.1484 0.1585 'International Tables Vol C Tables 4.2.6.8 and 6.1.1.4'
 'Cu' 'Cu' 0.3201 1.2651 'International Tables Vol C Tables 4.2.6.8 and 6.1.1.4'
 'N' 'N' 0.0061 0.0033 'International Tables Vol C Tables 4.2.6.8 and 6.1.1.4'
 'O' 'O' 0.0106 0.0060 'International Tables Vol C Tables 4.2.6.8 and 6.1.1.4'
 'Zn' 'Zn' 0.2839 1.4301 'International Tables Vol C Tables 4.2.6.8 and 6.1.1.4'

_shelx_space_group_comment
;
The symmetry employed for this shelxl refinement is uniquely defined
by the following loop, which should always be used as a source of
symmetry information in preference to the above space-group names.
They are only intended as comments.
;
_space_group_crystal_system        'monoclinic'
_space_group_IT_number             4
_space_group_name_H-M_alt          'P 1 21 1'
_space_group_name_Hall             'P 2yb'
loop_
  _space_group_symop_operation_xyz
 'x, y, z'
 '-x, y+1/2, -z'

_cell_length_a                     9.9812(11)
_cell_length_b                     19.966(2)
_cell_length_c                     11.0609(12)
_cell_angle_alpha                  90
_cell_angle_beta                   105.840(4)
_cell_angle_gamma                  90
_cell_volume                       2120.6(4)
_cell_formula_units_Z              2
_cell_measurement_reflns_used      7093
_cell_measurement_temperature      293(2)
_cell_measurement_theta_max        27.4825
_cell_measurement_theta_min       2.1688
_shelx_estimated_absorpt_T_max     0.644
_shelx_estimated_absorpt_T_min     0.486
_exptl_absorpt_coefficient_mu      2.408
_exptl_absorpt_correction_T_max    0.6445
_exptl_absorpt_correction_T_min    0.4861
_exptl_absorpt_correction_type    multi-scan 
_exptl_absorpt_process_details     ?
_exptl_absorpt_special_details     ?
_exptl_crystal_colour              Brown
_exptl_crystal_density_diffrn      1.658
_exptl_crystal_density_meas        ?
_exptl_crystal_density_method      'not measured'
_exptl_crystal_description         Block
_exptl_crystal_F_000               1080
_exptl_crystal_size_max            0.35
_exptl_crystal_size_mid            0.2
_exptl_crystal_size_min            0.2
_exptl_special_details
;
 ?
;
_exptl_transmission_factor_max     ?
_exptl_transmission_factor_min     ?
_diffrn_reflns_av_R_equivalents    0.1772
_diffrn_reflns_av_unetI/netI       0.1283
_diffrn_reflns_Laue_measured_fraction_full  0.998
_diffrn_reflns_Laue_measured_fraction_max  0.998
_diffrn_reflns_limit_h_max         11
_diffrn_reflns_limit_h_min         -11
_diffrn_reflns_limit_k_max         23
_diffrn_reflns_limit_k_min         -23
_diffrn_reflns_limit_l_max         12
_diffrn_reflns_limit_l_min         -13
_diffrn_reflns_number              22783
_diffrn_reflns_point_group_measured_fraction_full  0.990
_diffrn_reflns_point_group_measured_fraction_max  0.990
_diffrn_reflns_theta_full          24.996
_diffrn_reflns_theta_max           24.996
_diffrn_reflns_theta_min           1.914
_diffrn_ambient_temperature        293(2)
_diffrn_detector_area_resol_mean   ?
_diffrn_measured_fraction_theta_full  0.998
_diffrn_measured_fraction_theta_max  0.998
_diffrn_measurement_device_type     'Bruker APEX-II CCD'
_diffrn_measurement_method         '\f and \w scans'
_diffrn_radiation_type             MoK\a
_diffrn_radiation_wavelength       0.71073
_diffrn_source                     ?
_reflns_Friedel_coverage           0.923
_reflns_Friedel_fraction_full      0.981
_reflns_Friedel_fraction_max       0.981
_reflns_number_gt                  6072
_reflns_number_total               7370
_reflns_special_details
;
 Reflections were merged by SHELXL according to the crystal
 class for the calculation of statistics and refinement.
 
 _reflns_Friedel_fraction is defined as the number of unique
 Friedel pairs measured divided by the number that would be
 possible theoretically, ignoring centric projections and
 systematic absences.
;
_reflns_threshold_expression       'I > 2\s(I)'
_computing_cell_refinement         ?
_computing_data_collection         ?
_computing_data_reduction          ?
_computing_molecular_graphics      'Olex2 (Dolomanov et al., 2009)'
_computing_publication_material    'Olex2 (Dolomanov et al., 2009)'
_computing_structure_refinement    'XL (Sheldrick, 2008)'
_computing_structure_solution      ?
_refine_diff_density_max           0.745
_refine_diff_density_min           -1.032
_refine_diff_density_rms           0.129
_refine_ls_abs_structure_details
;
 Classical Flack method preferred over Parsons because s.u. lower.
;
_refine_ls_abs_structure_Flack     -0.01(3)
_refine_ls_extinction_coef         .
_refine_ls_extinction_method       none
_refine_ls_goodness_of_fit_ref     0.999
_refine_ls_hydrogen_treatment      constr
_refine_ls_matrix_type             full
_refine_ls_number_parameters       511
_refine_ls_number_reflns           7370
_refine_ls_number_restraints       1
_refine_ls_R_factor_all            0.0830
_refine_ls_R_factor_gt             0.0718
_refine_ls_restrained_S_all        0.999
_refine_ls_shift/su_max            0.002
_refine_ls_shift/su_mean           0.000
_refine_ls_structure_factor_coef   Fsqd
_refine_ls_weighting_details      
 'w=1/[\s^2^(Fo^2^)+(0.1049P)^2^] where P=(Fo^2^+2Fc^2^)/3'
_refine_ls_weighting_scheme        calc
_refine_ls_wR_factor_gt            0.1716
_refine_ls_wR_factor_ref           0.1799
_refine_special_details            ?
_olex2_refinement_description
;
1. Fixed Uiso
 At 1.2 times of:
  All C(H) groups, All C(H,H) groups
 At 1.5 times of:
  All C(H,H,H) groups
2.a Ternary CH refined with riding coordinates:
 C6(H6), C11(H11), C25(H25), C30(H30)
2.b Secondary CH2 refined with riding coordinates:
 C3(H3A,H3B), C7(H7A,H7B), C8(H8A,H8B), C9(H9A,H9B), C10(H10A,H10B), C22(H22A,
 H22B), C26(H26A,H26B), C27(H27A,H27B), C28(H28A,H28B), C29(H29A,H29B)
2.c Aromatic/amide H refined with riding coordinates:
 C12(H12), C14(H14), C15(H15), C16(H16), C31(H31), C33(H33), C34(H34), C35(H35)
2.d Idealised Me refined as rotating group:
 C1(H1A,H1B,H1C), C5(H5A,H5B,H5C), C19(H19A,H19B,H19C), C20(H20A,H20B,H20C),
 C24(H24A,H24B,H24C), C38(H38A,H38B,H38C)
;
_atom_sites_solution_hydrogens     geom
_atom_sites_solution_primary       ?
_atom_sites_solution_secondary     ?
loop_
  _atom_site_label
  _atom_site_type_symbol
  _atom_site_fract_x
  _atom_site_fract_y
  _atom_site_fract_z
  _atom_site_U_iso_or_equiv
  _atom_site_adp_type
  _atom_site_occupancy
  _atom_site_site_symmetry_order
  _atom_site_calc_flag
  _atom_site_refinement_flags_posn
  _atom_site_refinement_flags_adp
  _atom_site_refinement_flags_occupancy
  _atom_site_disorder_assembly
  _atom_site_disorder_group
 C1 C 0.3394(13) -0.2023(6) -0.6192(12) 0.071(4) Uani 1 1 d . . . . .
 H1A H 0.3791 -0.1621 -0.6421 0.106 Uiso 1 1 calc GR . . . .
 H1B H 0.2903 -0.1920 -0.5580 0.106 Uiso 1 1 calc GR . . . .
 H1C H 0.2760 -0.2214 -0.6924 0.106 Uiso 1 1 calc GR . . . .
 C2 C 0.4543(10) -0.2520(6) -0.5640(9) 0.048(3) Uani 1 1 d . . . . .
 C3 C 0.4582(11) -0.3127(5) -0.6211(10) 0.057(3) Uani 1 1 d . . . . .
 H3A H 0.4521 -0.3020 -0.7080 0.068 Uiso 1 1 calc R . . . .
 H3B H 0.3710 -0.3344 -0.6220 0.068 Uiso 1 1 calc R . . . .
 C4 C 0.5607(10) -0.3640(5) -0.5879(9) 0.047(3) Uani 1 1 d . . . . .
 C5 C 0.5499(18) -0.4148(6) -0.6886(11) 0.090(5) Uani 1 1 d . . . . .
 H5A H 0.6403 -0.4224 -0.7007 0.135 Uiso 1 1 calc GR . . . .
 H5B H 0.4877 -0.3988 -0.7654 0.135 Uiso 1 1 calc GR . . . .
 H5C H 0.5146 -0.4560 -0.6645 0.135 Uiso 1 1 calc GR . . . .
 C6 C 0.7694(10) -0.4154(4) -0.4438(9) 0.043(2) Uani 1 1 d . . . . .
 H6 H 0.8404 -0.4038 -0.4863 0.052 Uiso 1 1 calc R . . . .
 C7 C 0.7346(14) -0.4898(5) -0.4696(12) 0.073(4) Uani 1 1 d . . . . .
 H7A H 0.6699 -0.5041 -0.4234 0.088 Uiso 1 1 calc R . . . .
 H7B H 0.6904 -0.4963 -0.5585 0.088 Uiso 1 1 calc R . . . .
 C8 C 0.8657(14) -0.5317(5) -0.4305(11) 0.073(4) Uani 1 1 d . . . . .
 H8A H 0.9275 -0.5193 -0.4808 0.088 Uiso 1 1 calc R . . . .
 H8B H 0.8416 -0.5786 -0.4463 0.088 Uiso 1 1 calc R . . . .
 C9 C 0.9406(12) -0.5224(5) -0.2925(10) 0.056(3) Uani 1 1 d . . . . .
 H9A H 0.8844 -0.5413 -0.2420 0.068 Uiso 1 1 calc R . . . .
 H9B H 1.0281 -0.5466 -0.2732 0.068 Uiso 1 1 calc R . . . .
 C10 C 0.9691(10) -0.4493(5) -0.2580(10) 0.048(3) Uani 1 1 d . . . . .
 H10A H 1.0050 -0.4450 -0.1676 0.058 Uiso 1 1 calc R . . . .
 H10B H 1.0388 -0.4322 -0.2963 0.058 Uiso 1 1 calc R . . . .
 C11 C 0.8365(9) -0.4091(4) -0.3032(8) 0.038(2) Uani 1 1 d . . . . .
 H11 H 0.7703 -0.4290 -0.2624 0.046 Uiso 1 1 calc R . . . .
 C12 C 0.9336(8) -0.3168(4) -0.1687(8) 0.035(2) Uani 1 1 d . . . . .
 H12 H 1.0061 -0.3454 -0.1298 0.042 Uiso 1 1 calc R . . . .
 C13 C 0.9294(8) -0.2509(5) -0.1109(9) 0.039(2) Uani 1 1 d . . . . .
 C14 C 1.0215(10) -0.2401(5) 0.0081(11) 0.053(3) Uani 1 1 d . . . . .
 H14 H 1.0901 -0.2716 0.0419 0.063 Uiso 1 1 calc R . . . .
 C15 C 1.0112(12) -0.1833(5) 0.0754(10) 0.062(3) Uani 1 1 d . . . . .
 H15 H 1.0706 -0.1773 0.1555 0.074 Uiso 1 1 calc R . . . .
 C16 C 0.9135(11) -0.1356(5) 0.0243(9) 0.051(3) Uani 1 1 d . . . . .
 H16 H 0.9063 -0.0975 0.0705 0.061 Uiso 1 1 calc R . . . .
 C17 C 0.8264(9) -0.1436(4) -0.0938(8) 0.039(2) Uani 1 1 d . . . . .
 C18 C 0.8327(8) -0.2010(4) -0.1644(8) 0.036(2) Uani 1 1 d . . . . .
 C19 C 0.6996(13) -0.0425(5) -0.0892(12) 0.071(3) Uani 1 1 d . . . . .
 H19A H 0.6261 -0.0165 -0.1428 0.106 Uiso 1 1 calc GR . . . .
 H19B H 0.7814 -0.0152 -0.0609 0.106 Uiso 1 1 calc GR . . . .
 H19C H 0.6710 -0.0581 -0.0181 0.106 Uiso 1 1 calc GR . . . .
 C20 C 0.6108(14) -0.2479(7) 0.1345(14) 0.080(4) Uani 1 1 d . . . . .
 H20A H 0.5654 -0.2899 0.1391 0.120 Uiso 1 1 calc GR . . . .
 H20B H 0.6593 -0.2335 0.2177 0.120 Uiso 1 1 calc GR . . . .
 H20C H 0.6759 -0.2534 0.0854 0.120 Uiso 1 1 calc GR . . . .
 C21 C 0.5043(11) -0.1966(5) 0.0741(10) 0.053(3) Uani 1 1 d . . . . .
 C22 C 0.5061(12) -0.1338(6) 0.1242(11) 0.064(3) Uani 1 1 d . . . . .
 H22A H 0.6026 -0.1196 0.1425 0.077 Uiso 1 1 calc R . . . .
 H22B H 0.4882 -0.1408 0.2051 0.077 Uiso 1 1 calc R . . . .
 C23 C 0.4265(11) -0.0752(5) 0.0735(11) 0.054(3) Uani 1 1 d . . . . .
 C24 C 0.4852(15) -0.0124(6) 0.1495(16) 0.093(5) Uani 1 1 d . . . . .
 H24A H 0.5132 0.0193 0.0959 0.139 Uiso 1 1 calc GR . . . .
 H24B H 0.5642 -0.0245 0.2174 0.139 Uiso 1 1 calc GR . . . .
 H24C H 0.4148 0.0072 0.1826 0.139 Uiso 1 1 calc GR . . . .
 C25 C 0.2417(10) -0.0206(4) -0.0958(9) 0.044(2) Uani 1 1 d . . . . .
 H25 H 0.2855 -0.0095 -0.1624 0.053 Uiso 1 1 calc R . . . .
 C26 C 0.2282(15) 0.0441(5) -0.0301(12) 0.071(4) Uani 1 1 d . . . . .
 H26A H 0.1869 0.0351 0.0380 0.085 Uiso 1 1 calc R . . . .
 H26B H 0.3203 0.0627 0.0061 0.085 Uiso 1 1 calc R . . . .
 C27 C 0.1406(14) 0.0950(5) -0.1170(12) 0.073(4) Uani 1 1 d . . . . .
 H27A H 0.1359 0.1356 -0.0703 0.087 Uiso 1 1 calc R . . . .
 H27B H 0.1848 0.1060 -0.1825 0.087 Uiso 1 1 calc R . . . .
 C28 C -0.0038(12) 0.0703(5) -0.1763(11) 0.067(3) Uani 1 1 d . . . . .
 H28A H -0.0553 0.1036 -0.2347 0.080 Uiso 1 1 calc R . . . .
 H28B H -0.0518 0.0629 -0.1122 0.080 Uiso 1 1 calc R . . . .
 C29 C 0.0037(12) 0.0042(5) -0.2467(11) 0.063(3) Uani 1 1 d . . . . .
 H29A H -0.0893 -0.0140 -0.2787 0.076 Uiso 1 1 calc R . . . .
 H29B H 0.0405 0.0132 -0.3177 0.076 Uiso 1 1 calc R . . . .
 C30 C 0.0952(9) -0.0465(4) -0.1613(9) 0.042(2) Uani 1 1 d . . . . .
 H30 H 0.0504 -0.0566 -0.0948 0.051 Uiso 1 1 calc R . . . .
 C31 C 0.0259(9) -0.1308(4) -0.3247(9) 0.041(2) Uani 1 1 d . . . . .
 H31 H -0.0488 -0.1032 -0.3624 0.050 Uiso 1 1 calc R . . . .
 C32 C 0.0387(9) -0.1940(4) -0.3878(9) 0.043(2) Uani 1 1 d . . . . .
 C33 C -0.0510(11) -0.2035(6) -0.5089(11) 0.060(3) Uani 1 1 d . . . . .
 H33 H -0.1161 -0.1707 -0.5440 0.072 Uiso 1 1 calc R . . . .
 C34 C -0.0441(13) -0.2603(6) -0.5759(12) 0.072(4) Uani 1 1 d . . . . .
 H34 H -0.1027 -0.2659 -0.6566 0.087 Uiso 1 1 calc R . . . .
 C35 C 0.0520(11) -0.3095(6) -0.5215(10) 0.058(3) Uani 1 1 d . . . . .
 H35 H 0.0555 -0.3486 -0.5664 0.070 Uiso 1 1 calc R . . . .
 C36 C 0.1397(9) -0.3026(4) -0.4069(9) 0.041(2) Uani 1 1 d . . . . .
 C37 C 0.1345(9) -0.2435(4) -0.3342(9) 0.038(2) Uani 1 1 d . . . . .
 C38 C 0.2753(12) -0.4021(5) -0.4097(11) 0.062(3) Uani 1 1 d . . . . .
 H38A H 0.3480 -0.4275 -0.3537 0.093 Uiso 1 1 calc GR . . . .
 H38B H 0.3082 -0.3850 -0.4775 0.093 Uiso 1 1 calc GR . . . .
 H38C H 0.1962 -0.4305 -0.4429 0.093 Uiso 1 1 calc GR . . . .
 Cl1 Cl 0.6627(3) -0.06849(14) -0.4852(3) 0.0627(7) Uani 1 1 d . . . . .
 Cl2 Cl 0.4026(3) -0.11697(13) -0.3074(3) 0.0575(6) Uani 1 1 d . . . . .
 Cl3 Cl 0.5646(3) -0.32905(13) -0.1808(3) 0.0622(7) Uani 1 1 d . . . . .
 Cl4 Cl 0.2945(3) -0.37748(12) -0.0140(3) 0.0547(6) Uani 1 1 d . . . . .
 Cu1 Cu 0.69072(11) -0.28895(5) -0.36914(10) 0.0394(3) Uani 1 1 d . . . . .
 Cu2 Cu 0.27037(11) -0.15834(5) -0.12517(11) 0.0405(3) Uani 1 1 d . . . . .
 N1 N 0.6571(8) -0.3656(3) -0.4821(8) 0.0406(19) Uani 1 1 d . . . . .
 N2 N 0.8472(7) -0.3376(3) -0.2668(7) 0.0347(17) Uani 1 1 d . . . . .
 N3 N 0.3214(8) -0.0774(4) -0.0253(7) 0.045(2) Uani 1 1 d . . . . .
 N4 N 0.1079(7) -0.1110(3) -0.2239(7) 0.0388(18) Uani 1 1 d . . . . .
 O1 O 0.5464(7) -0.2324(3) -0.4673(7) 0.0493(19) Uani 1 1 d . . . . .
 O2 O 0.7456(6) -0.2060(3) -0.2788(5) 0.0372(15) Uani 1 1 d . . . . .
 O3 O 0.7300(8) -0.0986(3) -0.1578(7) 0.058(2) Uani 1 1 d . . . . .
 O4 O 0.4109(7) -0.2153(3) -0.0278(7) 0.0515(19) Uani 1 1 d . . . . .
 O5 O 0.2195(6) -0.2401(3) -0.2197(6) 0.0428(17) Uani 1 1 d . . . . .
 O6 O 0.2359(7) -0.3476(3) -0.3428(7) 0.0551(19) Uani 1 1 d . . . . .
 Zn1 Zn 0.59528(10) -0.14130(5) -0.36155(10) 0.0416(3) Uani 1 1 d . . . . .
 Zn2 Zn 0.36695(10) -0.30533(5) -0.13533(10) 0.0416(3) Uani 1 1 d . . . . .

loop_
  _atom_site_aniso_label
  _atom_site_aniso_U_11
  _atom_site_aniso_U_22
  _atom_site_aniso_U_33
  _atom_site_aniso_U_23
  _atom_site_aniso_U_13
  _atom_site_aniso_U_12
 C1 0.060(7) 0.066(6) 0.074(8) 0.001(6) -0.005(6) 0.018(6)
 C2 0.035(5) 0.066(6) 0.037(5) 0.006(5) -0.001(4) -0.001(4)
 C3 0.050(5) 0.060(6) 0.047(6) -0.011(5) -0.011(5) -0.005(5)
 C4 0.050(5) 0.044(5) 0.043(6) -0.004(4) 0.002(4) -0.004(4)
 C5 0.131(12) 0.069(7) 0.045(7) -0.021(6) -0.018(8) 0.023(8)
 C6 0.048(5) 0.040(4) 0.042(5) -0.012(4) 0.013(4) 0.000(4)
 C7 0.088(8) 0.048(6) 0.063(8) -0.009(5) -0.016(7) 0.013(6)
 C8 0.100(9) 0.049(5) 0.060(7) -0.023(5) 0.004(7) 0.013(6)
 C9 0.074(6) 0.044(5) 0.050(6) 0.005(4) 0.016(5) 0.015(5)
 C10 0.049(5) 0.046(5) 0.045(6) -0.001(4) 0.003(4) 0.007(4)
 C11 0.039(4) 0.035(4) 0.044(5) -0.001(4) 0.019(3) 0.001(3)
 C12 0.025(4) 0.047(4) 0.029(4) 0.002(4) 0.002(3) 0.000(3)
 C13 0.027(4) 0.044(4) 0.046(5) 0.002(4) 0.008(4) 0.001(3)
 C14 0.041(5) 0.055(6) 0.055(6) -0.004(5) 0.003(5) 0.006(4)
 C15 0.059(6) 0.068(7) 0.046(6) -0.010(5) -0.008(5) 0.002(5)
 C16 0.058(5) 0.052(5) 0.040(5) -0.015(4) 0.007(4) -0.006(5)
 C17 0.037(4) 0.037(4) 0.045(5) 0.001(4) 0.013(3) -0.002(4)
 C18 0.031(4) 0.036(4) 0.041(5) 0.003(4) 0.012(3) -0.003(3)
 C19 0.082(7) 0.059(6) 0.074(7) -0.021(5) 0.026(6) 0.021(5)
 C20 0.070(8) 0.066(7) 0.085(10) 0.004(7) -0.015(7) 0.007(6)
 C21 0.049(6) 0.051(5) 0.049(6) 0.009(5) -0.004(5) -0.003(5)
 C22 0.055(6) 0.065(6) 0.067(7) 0.009(6) 0.006(5) -0.010(5)
 C23 0.044(5) 0.055(6) 0.062(7) -0.011(5) 0.012(5) -0.007(4)
 C24 0.079(9) 0.057(6) 0.126(12) -0.026(7) 0.001(9) -0.005(6)
 C25 0.056(5) 0.039(4) 0.041(5) 0.004(4) 0.019(4) -0.002(4)
 C26 0.097(9) 0.041(5) 0.071(8) -0.006(5) 0.017(7) 0.009(6)
 C27 0.095(8) 0.046(5) 0.082(8) -0.006(5) 0.032(6) 0.012(6)
 C28 0.092(7) 0.048(5) 0.078(7) 0.012(5) 0.053(5) 0.026(5)
 C29 0.069(6) 0.050(6) 0.077(8) -0.003(5) 0.027(5) 0.013(5)
 C30 0.046(4) 0.038(4) 0.054(5) 0.000(4) 0.032(3) 0.002(3)
 C31 0.033(4) 0.037(4) 0.054(5) 0.008(4) 0.011(4) 0.002(3)
 C32 0.035(4) 0.034(4) 0.057(6) 0.002(4) 0.010(4) -0.005(3)
 C33 0.048(6) 0.055(5) 0.061(7) 0.002(5) -0.011(5) 0.009(5)
 C34 0.069(7) 0.076(7) 0.057(7) -0.021(6) -0.007(6) 0.004(6)
 C35 0.057(6) 0.062(6) 0.053(6) -0.015(5) 0.009(5) 0.000(5)
 C36 0.041(4) 0.039(4) 0.048(5) 0.001(4) 0.021(3) -0.001(4)
 C37 0.030(4) 0.039(4) 0.044(5) 0.001(4) 0.010(4) -0.004(3)
 C38 0.074(6) 0.051(5) 0.066(7) -0.015(5) 0.027(5) 0.009(5)
 Cl1 0.0526(13) 0.0722(15) 0.0669(16) 0.0282(12) 0.0225(11) 0.0032(12)
 Cl2 0.0516(11) 0.0612(14) 0.0719(15) 0.0093(11) 0.0376(10) 0.0097(10)
 Cl3 0.0487(11) 0.0642(14) 0.0846(17) 0.0142(13) 0.0365(11) 0.0085(11)
 Cl4 0.0494(12) 0.0540(12) 0.0622(15) 0.0232(11) 0.0177(10) -0.0005(10)
 Cu1 0.0365(5) 0.0371(5) 0.0399(6) -0.0047(5) 0.0026(4) 0.0063(4)
 Cu2 0.0426(5) 0.0329(5) 0.0439(6) -0.0008(4) 0.0082(5) 0.0018(4)
 N1 0.040(4) 0.035(3) 0.047(4) -0.001(3) 0.013(3) 0.000(3)
 N2 0.029(3) 0.033(3) 0.043(4) 0.001(3) 0.011(3) 0.004(3)
 N3 0.053(4) 0.042(4) 0.042(4) -0.001(3) 0.016(3) -0.005(3)
 N4 0.035(3) 0.032(3) 0.051(4) 0.004(3) 0.014(3) 0.001(3)
 O1 0.049(4) 0.045(3) 0.044(4) -0.006(3) -0.004(3) 0.018(3)
 O2 0.043(3) 0.032(3) 0.032(3) -0.002(2) 0.002(3) 0.001(2)
 O3 0.068(4) 0.041(3) 0.055(4) -0.007(3) 0.003(4) 0.012(3)
 O4 0.056(4) 0.037(3) 0.053(4) 0.006(3) -0.001(3) 0.006(3)
 O5 0.044(3) 0.037(3) 0.046(4) 0.002(3) 0.009(3) 0.003(3)
 O6 0.060(4) 0.040(3) 0.064(4) -0.003(3) 0.015(3) 0.012(3)
 Zn1 0.0394(5) 0.0399(5) 0.0482(6) 0.0068(4) 0.0164(4) 0.0073(4)
 Zn2 0.0374(5) 0.0376(5) 0.0529(6) 0.0088(4) 0.0177(4) 0.0048(4)

_geom_special_details
;
 All esds (except the esd in the dihedral angle between two l.s. planes)
 are estimated using the full covariance matrix.  The cell esds are taken
 into account individually in the estimation of esds in distances, angles
 and torsion angles; correlations between esds in cell parameters are only
 used when they are defined by crystal symmetry.  An approximate (isotropic)
 treatment of cell esds is used for estimating esds involving l.s. planes.
;
loop_
  _geom_bond_atom_site_label_1
  _geom_bond_atom_site_label_2
  _geom_bond_distance
  _geom_bond_site_symmetry_2
  _geom_bond_publ_flag
 C1 H1A 0.9600 . ?
 C1 H1B 0.9600 . ?
 C1 H1C 0.9600 . ?
 C1 C2 1.513(15) . ?
 C2 C3 1.372(15) . ?
 C2 O1 1.267(11) . ?
 C3 H3A 0.9700 . ?
 C3 H3B 0.9700 . ?
 C3 C4 1.424(14) . ?
 C4 C5 1.488(15) . ?
 C4 N1 1.297(12) . ?
 C5 H5A 0.9600 . ?
 C5 H5B 0.9600 . ?
 C5 H5C 0.9600 . ?
 C6 H6 0.9800 . ?
 C6 C7 1.535(14) . ?
 C6 C11 1.522(13) . ?
 C6 N1 1.472(11) . ?
 C7 H7A 0.9700 . ?
 C7 H7B 0.9700 . ?
 C7 C8 1.513(17) . ?
 C8 H8A 0.9700 . ?
 C8 H8B 0.9700 . ?
 C8 C9 1.516(15) . ?
 C9 H9A 0.9700 . ?
 C9 H9B 0.9700 . ?
 C9 C10 1.515(14) . ?
 C10 H10A 0.9700 . ?
 C10 H10B 0.9700 . ?
 C10 C11 1.511(12) . ?
 C11 H11 0.9800 . ?
 C11 N2 1.479(10) . ?
 C12 H12 0.9300 . ?
 C12 C13 1.468(13) . ?
 C12 N2 1.258(10) . ?
 C13 C14 1.401(14) . ?
 C13 C18 1.401(12) . ?
 C14 H14 0.9300 . ?
 C14 C15 1.375(15) . ?
 C15 H15 0.9300 . ?
 C15 C16 1.369(15) . ?
 C16 H16 0.9300 . ?
 C16 C17 1.367(13) . ?
 C17 C18 1.398(13) . ?
 C17 O3 1.363(11) . ?
 C18 O2 1.329(10) . ?
 C19 H19A 0.9600 . ?
 C19 H19B 0.9600 . ?
 C19 H19C 0.9600 . ?
 C19 O3 1.432(12) . ?
 C20 H20A 0.9600 . ?
 C20 H20B 0.9600 . ?
 C20 H20C 0.9600 . ?
 C20 C21 1.496(16) . ?
 C21 C22 1.369(16) . ?
 C21 O4 1.306(11) . ?
 C22 H22A 0.9700 . ?
 C22 H22B 0.9700 . ?
 C22 C23 1.438(15) . ?
 C23 C24 1.534(16) . ?
 C23 N3 1.293(12) . ?
 C24 H24A 0.9600 . ?
 C24 H24B 0.9600 . ?
 C24 H24C 0.9600 . ?
 C25 H25 0.9800 . ?
 C25 C26 1.507(14) . ?
 C25 C30 1.533(13) . ?
 C25 N3 1.478(12) . ?
 C26 H26A 0.9700 . ?
 C26 H26B 0.9700 . ?
 C26 C27 1.503(16) . ?
 C27 H27A 0.9700 . ?
 C27 H27B 0.9700 . ?
 C27 C28 1.494(17) . ?
 C28 H28A 0.9700 . ?
 C28 H28B 0.9700 . ?
 C28 C29 1.544(14) . ?
 C29 H29A 0.9700 . ?
 C29 H29B 0.9700 . ?
 C29 C30 1.509(14) . ?
 C30 H30 0.9800 . ?
 C30 N4 1.485(11) . ?
 C31 H31 0.9300 . ?
 C31 C32 1.465(13) . ?
 C31 N4 1.253(11) . ?
 C32 C33 1.407(14) . ?
 C32 C37 1.390(12) . ?
 C33 H33 0.9300 . ?
 C33 C34 1.366(17) . ?
 C34 H34 0.9300 . ?
 C34 C35 1.391(16) . ?
 C35 H35 0.9300 . ?
 C35 C36 1.337(13) . ?
 C36 C37 1.437(13) . ?
 C36 O6 1.363(11) . ?
 C37 O5 1.320(11) . ?
 C38 H38A 0.9600 . ?
 C38 H38B 0.9600 . ?
 C38 H38C 0.9600 . ?
 C38 O6 1.431(12) . ?
 Cl1 Zn1 2.223(3) . ?
 Cl2 Zn1 2.219(3) . ?
 Cl3 Zn2 2.216(3) . ?
 Cl4 Zn2 2.220(3) . ?
 Cu1 N1 1.946(7) . ?
 Cu1 N2 1.923(7) . ?
 Cu1 O1 1.917(6) . ?
 Cu1 O2 1.934(6) . ?
 Cu1 Zn1 3.1062(13) . ?
 Cu2 N3 1.946(8) . ?
 Cu2 N4 1.936(7) . ?
 Cu2 O4 1.896(6) . ?
 Cu2 O5 1.930(6) . ?
 Cu2 Zn2 3.1006(14) . ?
 O1 Zn1 2.146(6) . ?
 O2 Zn1 2.002(6) . ?
 O3 Zn1 2.441(7) . ?
 O4 Zn2 2.134(6) . ?
 O5 Zn2 1.996(6) . ?
 O6 Zn2 2.460(7) . ?

loop_
  _geom_angle_atom_site_label_1
  _geom_angle_atom_site_label_2
  _geom_angle_atom_site_label_3
  _geom_angle
  _geom_angle_site_symmetry_1
  _geom_angle_site_symmetry_3
  _geom_angle_publ_flag
 H1A C1 H1B 109.5 . . ?
 H1A C1 H1C 109.5 . . ?
 H1B C1 H1C 109.5 . . ?
 C2 C1 H1A 109.5 . . ?
 C2 C1 H1B 109.5 . . ?
 C2 C1 H1C 109.5 . . ?
 C3 C2 C1 120.5(9) . . ?
 O1 C2 C1 115.7(10) . . ?
 O1 C2 C3 123.8(9) . . ?
 C2 C3 H3A 105.1 . . ?
 C2 C3 H3B 105.1 . . ?
 C2 C3 C4 128.7(9) . . ?
 H3A C3 H3B 105.9 . . ?
 C4 C3 H3A 105.1 . . ?
 C4 C3 H3B 105.1 . . ?
 C3 C4 C5 113.4(9) . . ?
 N1 C4 C3 123.6(9) . . ?
 N1 C4 C5 122.9(9) . . ?
 C4 C5 H5A 109.5 . . ?
 C4 C5 H5B 109.5 . . ?
 C4 C5 H5C 109.5 . . ?
 H5A C5 H5B 109.5 . . ?
 H5A C5 H5C 109.5 . . ?
 H5B C5 H5C 109.5 . . ?
 C7 C6 H6 107.2 . . ?
 C11 C6 H6 107.2 . . ?
 C11 C6 C7 106.5(8) . . ?
 N1 C6 H6 107.2 . . ?
 N1 C6 C7 119.0(8) . . ?
 N1 C6 C11 109.1(7) . . ?
 C6 C7 H7A 109.6 . . ?
 C6 C7 H7B 109.6 . . ?
 H7A C7 H7B 108.1 . . ?
 C8 C7 C6 110.4(10) . . ?
 C8 C7 H7A 109.6 . . ?
 C8 C7 H7B 109.6 . . ?
 C7 C8 H8A 109.3 . . ?
 C7 C8 H8B 109.3 . . ?
 C7 C8 C9 111.7(10) . . ?
 H8A C8 H8B 107.9 . . ?
 C9 C8 H8A 109.3 . . ?
 C9 C8 H8B 109.3 . . ?
 C8 C9 H9A 109.1 . . ?
 C8 C9 H9B 109.1 . . ?
 H9A C9 H9B 107.9 . . ?
 C10 C9 C8 112.3(9) . . ?
 C10 C9 H9A 109.1 . . ?
 C10 C9 H9B 109.1 . . ?
 C9 C10 H10A 109.7 . . ?
 C9 C10 H10B 109.7 . . ?
 H10A C10 H10B 108.2 . . ?
 C11 C10 C9 109.9(8) . . ?
 C11 C10 H10A 109.7 . . ?
 C11 C10 H10B 109.7 . . ?
 C6 C11 H11 105.8 . . ?
 C10 C11 C6 113.3(8) . . ?
 C10 C11 H11 105.8 . . ?
 N2 C11 C6 109.7(7) . . ?
 N2 C11 C10 115.6(7) . . ?
 N2 C11 H11 105.8 . . ?
 C13 C12 H12 117.4 . . ?
 N2 C12 H12 117.4 . . ?
 N2 C12 C13 125.3(7) . . ?
 C14 C13 C12 117.2(8) . . ?
 C18 C13 C12 123.4(8) . . ?
 C18 C13 C14 119.2(9) . . ?
 C13 C14 H14 119.7 . . ?
 C15 C14 C13 120.6(9) . . ?
 C15 C14 H14 119.7 . . ?
 C14 C15 H15 120.0 . . ?
 C16 C15 C14 120.0(10) . . ?
 C16 C15 H15 120.0 . . ?
 C15 C16 H16 119.7 . . ?
 C17 C16 C15 120.6(9) . . ?
 C17 C16 H16 119.7 . . ?
 C16 C17 C18 121.0(8) . . ?
 O3 C17 C16 126.5(8) . . ?
 O3 C17 C18 112.5(7) . . ?
 C17 C18 C13 118.6(8) . . ?
 O2 C18 C13 123.0(8) . . ?
 O2 C18 C17 118.4(7) . . ?
 H19A C19 H19B 109.5 . . ?
 H19A C19 H19C 109.5 . . ?
 H19B C19 H19C 109.5 . . ?
 O3 C19 H19A 109.5 . . ?
 O3 C19 H19B 109.5 . . ?
 O3 C19 H19C 109.5 . . ?
 H20A C20 H20B 109.5 . . ?
 H20A C20 H20C 109.5 . . ?
 H20B C20 H20C 109.5 . . ?
 C21 C20 H20A 109.5 . . ?
 C21 C20 H20B 109.5 . . ?
 C21 C20 H20C 109.5 . . ?
 C22 C21 C20 121.1(10) . . ?
 O4 C21 C20 116.3(10) . . ?
 O4 C21 C22 122.6(9) . . ?
 C21 C22 H22A 104.8 . . ?
 C21 C22 H22B 104.8 . . ?
 C21 C22 C23 129.9(10) . . ?
 H22A C22 H22B 105.8 . . ?
 C23 C22 H22A 104.8 . . ?
 C23 C22 H22B 104.8 . . ?
 C22 C23 C24 111.3(9) . . ?
 N3 C23 C22 122.5(9) . . ?
 N3 C23 C24 126.2(10) . . ?
 C23 C24 H24A 109.5 . . ?
 C23 C24 H24B 109.5 . . ?
 C23 C24 H24C 109.5 . . ?
 H24A C24 H24B 109.5 . . ?
 H24A C24 H24C 109.5 . . ?
 H24B C24 H24C 109.5 . . ?
 C26 C25 H25 106.5 . . ?
 C26 C25 C30 108.5(9) . . ?
 C30 C25 H25 106.5 . . ?
 N3 C25 H25 106.5 . . ?
 N3 C25 C26 120.6(8) . . ?
 N3 C25 C30 107.3(7) . . ?
 C25 C26 H26A 109.1 . . ?
 C25 C26 H26B 109.1 . . ?
 H26A C26 H26B 107.8 . . ?
 C27 C26 C25 112.6(10) . . ?
 C27 C26 H26A 109.1 . . ?
 C27 C26 H26B 109.1 . . ?
 C26 C27 H27A 109.1 . . ?
 C26 C27 H27B 109.1 . . ?
 H27A C27 H27B 107.8 . . ?
 C28 C27 C26 112.4(10) . . ?
 C28 C27 H27A 109.1 . . ?
 C28 C27 H27B 109.1 . . ?
 C27 C28 H28A 109.8 . . ?
 C27 C28 H28B 109.8 . . ?
 C27 C28 C29 109.2(9) . . ?
 H28A C28 H28B 108.3 . . ?
 C29 C28 H28A 109.8 . . ?
 C29 C28 H28B 109.8 . . ?
 C28 C29 H29A 109.4 . . ?
 C28 C29 H29B 109.4 . . ?
 H29A C29 H29B 108.0 . . ?
 C30 C29 C28 111.2(9) . . ?
 C30 C29 H29A 109.4 . . ?
 C30 C29 H29B 109.4 . . ?
 C25 C30 H30 106.6 . . ?
 C29 C30 C25 114.0(8) . . ?
 C29 C30 H30 106.6 . . ?
 N4 C30 C25 108.7(7) . . ?
 N4 C30 C29 113.9(8) . . ?
 N4 C30 H30 106.6 . . ?
 C32 C31 H31 117.4 . . ?
 N4 C31 H31 117.4 . . ?
 N4 C31 C32 125.1(8) . . ?
 C33 C32 C31 117.0(8) . . ?
 C37 C32 C31 123.3(8) . . ?
 C37 C32 C33 119.7(9) . . ?
 C32 C33 H33 119.5 . . ?
 C34 C33 C32 121.0(10) . . ?
 C34 C33 H33 119.5 . . ?
 C33 C34 H34 120.6 . . ?
 C33 C34 C35 118.8(11) . . ?
 C35 C34 H34 120.6 . . ?
 C34 C35 H35 118.9 . . ?
 C36 C35 C34 122.3(10) . . ?
 C36 C35 H35 118.9 . . ?
 C35 C36 C37 120.1(8) . . ?
 C35 C36 O6 127.7(9) . . ?
 O6 C36 C37 112.2(7) . . ?
 C32 C37 C36 118.1(8) . . ?
 O5 C37 C32 124.0(8) . . ?
 O5 C37 C36 117.9(7) . . ?
 H38A C38 H38B 109.5 . . ?
 H38A C38 H38C 109.5 . . ?
 H38B C38 H38C 109.5 . . ?
 O6 C38 H38A 109.5 . . ?
 O6 C38 H38B 109.5 . . ?
 O6 C38 H38C 109.5 . . ?
 N1 Cu1 Zn1 139.8(2) . . ?
 N2 Cu1 N1 87.2(3) . . ?
 N2 Cu1 O2 93.4(3) . . ?
 N2 Cu1 Zn1 132.0(2) . . ?
 O1 Cu1 N1 97.4(3) . . ?
 O1 Cu1 N2 174.2(3) . . ?
 O1 Cu1 O2 81.5(2) . . ?
 O1 Cu1 Zn1 42.94(19) . . ?
 O2 Cu1 N1 168.5(3) . . ?
 O2 Cu1 Zn1 38.67(17) . . ?
 N3 Cu2 Zn2 140.5(2) . . ?
 N4 Cu2 N3 87.9(3) . . ?
 N4 Cu2 Zn2 131.5(2) . . ?
 O4 Cu2 N3 97.9(3) . . ?
 O4 Cu2 N4 171.5(3) . . ?
 O4 Cu2 O5 81.1(3) . . ?
 O4 Cu2 Zn2 42.6(2) . . ?
 O5 Cu2 N3 178.3(3) . . ?
 O5 Cu2 N4 92.9(3) . . ?
 O5 Cu2 Zn2 38.60(18) . . ?
 C4 N1 C6 126.5(8) . . ?
 C4 N1 Cu1 121.1(6) . . ?
 C6 N1 Cu1 111.3(5) . . ?
 C11 N2 Cu1 109.9(5) . . ?
 C12 N2 C11 122.4(7) . . ?
 C12 N2 Cu1 126.6(6) . . ?
 C23 N3 C25 128.1(8) . . ?
 C23 N3 Cu2 122.2(7) . . ?
 C25 N3 Cu2 108.5(5) . . ?
 C30 N4 Cu2 109.0(5) . . ?
 C31 N4 C30 124.8(7) . . ?
 C31 N4 Cu2 126.2(6) . . ?
 C2 O1 Cu1 123.8(6) . . ?
 C2 O1 Zn1 136.6(6) . . ?
 Cu1 O1 Zn1 99.6(3) . . ?
 C18 O2 Cu1 125.1(5) . . ?
 C18 O2 Zn1 126.9(5) . . ?
 Cu1 O2 Zn1 104.2(3) . . ?
 C17 O3 C19 117.5(8) . . ?
 C17 O3 Zn1 112.5(5) . . ?
 C19 O3 Zn1 128.3(6) . . ?
 C21 O4 Cu2 124.2(6) . . ?
 C21 O4 Zn2 135.3(6) . . ?
 Cu2 O4 Zn2 100.4(3) . . ?
 C37 O5 Cu2 124.7(5) . . ?
 C37 O5 Zn2 127.8(6) . . ?
 Cu2 O5 Zn2 104.3(3) . . ?
 C36 O6 C38 119.1(8) . . ?
 C36 O6 Zn2 112.2(5) . . ?
 C38 O6 Zn2 126.3(6) . . ?
 Cl1 Zn1 Cu1 117.23(9) . . ?
 Cl1 Zn1 O3 99.0(2) . . ?
 Cl2 Zn1 Cl1 116.96(11) . . ?
 Cl2 Zn1 Cu1 120.66(8) . . ?
 Cl2 Zn1 O3 88.5(2) . . ?
 O1 Zn1 Cl1 106.3(2) . . ?
 O1 Zn1 Cl2 104.4(2) . . ?
 O1 Zn1 Cu1 37.48(16) . . ?
 O1 Zn1 O3 141.7(2) . . ?
 O2 Zn1 Cl1 112.9(2) . . ?
 O2 Zn1 Cl2 127.9(2) . . ?
 O2 Zn1 Cu1 37.13(16) . . ?
 O2 Zn1 O1 74.5(2) . . ?
 O2 Zn1 O3 69.4(2) . . ?
 O3 Zn1 Cu1 105.09(16) . . ?
 Cl3 Zn2 Cl4 117.11(10) . . ?
 Cl3 Zn2 Cu2 121.02(8) . . ?
 Cl3 Zn2 O6 89.69(19) . . ?
 Cl4 Zn2 Cu2 115.87(8) . . ?
 Cl4 Zn2 O6 99.41(19) . . ?
 O4 Zn2 Cl3 104.3(2) . . ?
 O4 Zn2 Cl4 105.1(2) . . ?
 O4 Zn2 Cu2 36.96(17) . . ?
 O4 Zn2 O6 141.7(2) . . ?
 O5 Zn2 Cl3 128.4(2) . . ?
 O5 Zn2 Cl4 112.7(2) . . ?
 O5 Zn2 Cu2 37.08(18) . . ?
 O5 Zn2 O4 73.9(2) . . ?
 O5 Zn2 O6 69.6(2) . . ?
 O6 Zn2 Cu2 105.49(15) . . ?

_shelx_res_file
;
    q.res created by SHELXL-2014/7

TITL q in P 1 21 1 New: P21
CELL 0.71073 9.9812 19.966 11.0609 90 105.84 90
ZERR 2 0.0011 0.002 0.0012 0 0.004 0
LATT -1
SYMM -X,0.5+Y,-Z
SFAC C H Cl Cu N O Zn
UNIT 76 100 8 4 8 12 4

L.S. 5
PLAN  20
SIZE 0.2 0.2 0.35
BOND $H
DAMP 600.00 15.00
fmap 2
acta
MERG 2
OMIT 0 50
REM <olex2.extras>
REM <HklSrc "%.\\Q.hkl">
REM </olex2.extras>

WGHT    0.104900
FVAR       0.25597
C1    1    0.339408   -0.202328   -0.619171    11.00000    0.05971    0.06572 =
         0.07374    0.00098   -0.00507    0.01802
AFIX 137
H1A   2    0.379069   -0.162079   -0.642098    11.00000   -1.50000
H1B   2    0.290298   -0.192014   -0.557996    11.00000   -1.50000
H1C   2    0.275951   -0.221370   -0.692391    11.00000   -1.50000
AFIX   0
C2    1    0.454340   -0.252017   -0.564039    11.00000    0.03459    0.06567 =
         0.03668    0.00586   -0.00094   -0.00077
C3    1    0.458243   -0.312694   -0.621127    11.00000    0.05019    0.05955 =
         0.04682   -0.01078   -0.01101   -0.00504
AFIX  23
H3A   2    0.452051   -0.302048   -0.708048    11.00000   -1.20000
H3B   2    0.371027   -0.334382   -0.621986    11.00000   -1.20000
AFIX   0
C4    1    0.560711   -0.364040   -0.587897    11.00000    0.04957    0.04360 =
         0.04264   -0.00380    0.00163   -0.00381
C5    1    0.549856   -0.414825   -0.688567    11.00000    0.13137    0.06890 =
         0.04547   -0.02094   -0.01783    0.02335
AFIX 137
H5A   2    0.640258   -0.422419   -0.700737    11.00000   -1.50000
H5B   2    0.487704   -0.398825   -0.765419    11.00000   -1.50000
H5C   2    0.514602   -0.455998   -0.664497    11.00000   -1.50000
AFIX   0
C6    1    0.769350   -0.415426   -0.443811    11.00000    0.04839    0.03957 =
         0.04210   -0.01194    0.01307   -0.00038
AFIX  13
H6    2    0.840424   -0.403804   -0.486330    11.00000   -1.20000
AFIX   0
C7    1    0.734645   -0.489839   -0.469615    11.00000    0.08795    0.04775 =
         0.06272   -0.00921   -0.01607    0.01273
AFIX  23
H7A   2    0.669902   -0.504092   -0.423354    11.00000   -1.20000
H7B   2    0.690418   -0.496329   -0.558478    11.00000   -1.20000
AFIX   0
C8    1    0.865656   -0.531747   -0.430458    11.00000    0.09987    0.04920 =
         0.05982   -0.02268    0.00378    0.01304
AFIX  23
H8A   2    0.927510   -0.519323   -0.480830    11.00000   -1.20000
H8B   2    0.841620   -0.578615   -0.446269    11.00000   -1.20000
AFIX   0
C9    1    0.940571   -0.522392   -0.292532    11.00000    0.07403    0.04414 =
         0.05029    0.00482    0.01616    0.01467
AFIX  23
H9A   2    0.884364   -0.541293   -0.241990    11.00000   -1.20000
H9B   2    1.028128   -0.546592   -0.273164    11.00000   -1.20000
AFIX   0
C10   1    0.969091   -0.449317   -0.258050    11.00000    0.04857    0.04578 =
         0.04533   -0.00127    0.00321    0.00662
AFIX  23
H10A  2    1.004958   -0.444976   -0.167608    11.00000   -1.20000
H10B  2    1.038818   -0.432227   -0.296328    11.00000   -1.20000
AFIX   0
C11   1    0.836522   -0.409112   -0.303199    11.00000    0.03920    0.03518 =
         0.04442   -0.00121    0.01859    0.00131
AFIX  13
H11   2    0.770303   -0.428980   -0.262419    11.00000   -1.20000
AFIX   0
C12   1    0.933641   -0.316750   -0.168730    11.00000    0.02534    0.04675 =
         0.02888    0.00170    0.00229    0.00045
AFIX  43
H12   2    1.006086   -0.345366   -0.129769    11.00000   -1.20000
AFIX   0
C13   1    0.929416   -0.250889   -0.110883    11.00000    0.02661    0.04424 =
         0.04628    0.00239    0.00847    0.00109
C14   1    1.021479   -0.240097    0.008141    11.00000    0.04073    0.05525 =
         0.05547   -0.00365    0.00260    0.00630
AFIX  43
H14   2    1.090094   -0.271609    0.041946    11.00000   -1.20000
AFIX   0
C15   1    1.011220   -0.183303    0.075376    11.00000    0.05916    0.06819 =
         0.04572   -0.01006   -0.00787    0.00218
AFIX  43
H15   2    1.070645   -0.177268    0.155507    11.00000   -1.20000
AFIX   0
C16   1    0.913500   -0.135627    0.024343    11.00000    0.05813    0.05159 =
         0.03954   -0.01540    0.00723   -0.00596
AFIX  43
H16   2    0.906338   -0.097501    0.070479    11.00000   -1.20000
AFIX   0
C17   1    0.826376   -0.143579   -0.093826    11.00000    0.03692    0.03733 =
         0.04458    0.00128    0.01299   -0.00209
C18   1    0.832660   -0.201008   -0.164381    11.00000    0.03061    0.03642 =
         0.04145    0.00336    0.01189   -0.00278
C19   1    0.699643   -0.042486   -0.089242    11.00000    0.08245    0.05924 =
         0.07428   -0.02095    0.02645    0.02052
AFIX 137
H19A  2    0.626129   -0.016482   -0.142800    11.00000   -1.50000
H19B  2    0.781419   -0.015204   -0.060865    11.00000   -1.50000
H19C  2    0.671002   -0.058122   -0.018078    11.00000   -1.50000
AFIX   0

C20   1    0.610756   -0.247912    0.134499    11.00000    0.06956    0.06578 =
         0.08459    0.00386   -0.01456    0.00714
AFIX 137
H20A  2    0.565401   -0.289860    0.139110    11.00000   -1.50000
H20B  2    0.659295   -0.233453    0.217701    11.00000   -1.50000
H20C  2    0.675906   -0.253351    0.085449    11.00000   -1.50000
AFIX   0
C21   1    0.504291   -0.196610    0.074105    11.00000    0.04868    0.05129 =
         0.04888    0.00899   -0.00399   -0.00290
C22   1    0.506140   -0.133796    0.124166    11.00000    0.05534    0.06451 =
         0.06676    0.00936    0.00633   -0.00965
AFIX  23
H22A  2    0.602556   -0.119608    0.142530    11.00000   -1.20000
H22B  2    0.488178   -0.140823    0.205103    11.00000   -1.20000
AFIX   0
C23   1    0.426520   -0.075243    0.073527    11.00000    0.04450    0.05490 =
         0.06187   -0.01134    0.01235   -0.00717
C24   1    0.485164   -0.012444    0.149461    11.00000    0.07873    0.05745 =
         0.12604   -0.02572    0.00121   -0.00490
AFIX 137
H24A  2    0.513188    0.019286    0.095862    11.00000   -1.50000
H24B  2    0.564196   -0.024488    0.217435    11.00000   -1.50000
H24C  2    0.414820    0.007181    0.182620    11.00000   -1.50000
AFIX   0
C25   1    0.241659   -0.020619   -0.095752    11.00000    0.05597    0.03860 =
         0.04058    0.00360    0.01860   -0.00203
AFIX  13
H25   2    0.285475   -0.009468   -0.162406    11.00000   -1.20000
AFIX   0
C26   1    0.228190    0.044146   -0.030123    11.00000    0.09720    0.04059 =
         0.07142   -0.00618    0.01688    0.00948
AFIX  23
H26A  2    0.186871    0.035072    0.038031    11.00000   -1.20000
H26B  2    0.320275    0.062661    0.006088    11.00000   -1.20000
AFIX   0
C27   1    0.140633    0.094955   -0.117047    11.00000    0.09460    0.04584 =
         0.08217   -0.00623    0.03185    0.01218
AFIX  23
H27A  2    0.135904    0.135566   -0.070256    11.00000   -1.20000
H27B  2    0.184787    0.105988   -0.182491    11.00000   -1.20000
AFIX   0
C28   1   -0.003787    0.070346   -0.176346    11.00000    0.09236    0.04832 =
         0.07771    0.01193    0.05259    0.02597
AFIX  23
H28A  2   -0.055280    0.103602   -0.234733    11.00000   -1.20000
H28B  2   -0.051837    0.062923   -0.112213    11.00000   -1.20000
AFIX   0
C29   1    0.003736    0.004237   -0.246671    11.00000    0.06853    0.04963 =
         0.07658   -0.00315    0.02722    0.01291
AFIX  23
H29A  2   -0.089292   -0.014011   -0.278730    11.00000   -1.20000
H29B  2    0.040509    0.013170   -0.317686    11.00000   -1.20000
AFIX   0
C30   1    0.095181   -0.046452   -0.161323    11.00000    0.04606    0.03772 =
         0.05398    0.00030    0.03240    0.00192
AFIX  13
H30   2    0.050409   -0.056560   -0.094850    11.00000   -1.20000
AFIX   0
C31   1    0.025935   -0.130810   -0.324717    11.00000    0.03279    0.03694 =
         0.05383    0.00844    0.01074    0.00222
AFIX  43
H31   2   -0.048810   -0.103185   -0.362427    11.00000   -1.20000
AFIX   0
C32   1    0.038653   -0.194049   -0.387763    11.00000    0.03494    0.03435 =
         0.05703    0.00174    0.01001   -0.00523
C33   1   -0.051041   -0.203540   -0.508932    11.00000    0.04822    0.05536 =
         0.06128    0.00209   -0.01119    0.00893
AFIX  43
H33   2   -0.116060   -0.170665   -0.543969    11.00000   -1.20000
AFIX   0
C34   1   -0.044132   -0.260295   -0.575944    11.00000    0.06947    0.07596 =
         0.05729   -0.02106   -0.00658    0.00442
AFIX  43
H34   2   -0.102714   -0.265922   -0.656554    11.00000   -1.20000
AFIX   0
C35   1    0.052045   -0.309517   -0.521505    11.00000    0.05746    0.06195 =
         0.05271   -0.01485    0.00930    0.00005
AFIX  43
H35   2    0.055466   -0.348568   -0.566397    11.00000   -1.20000
AFIX   0
C36   1    0.139738   -0.302620   -0.406869    11.00000    0.04120    0.03903 =
         0.04813    0.00067    0.02103   -0.00059
C37   1    0.134477   -0.243524   -0.334177    11.00000    0.03028    0.03918 =
         0.04354    0.00078    0.00963   -0.00357
C38   1    0.275295   -0.402134   -0.409721    11.00000    0.07401    0.05083 =
         0.06574   -0.01543    0.02661    0.00934
AFIX 137
H38A  2    0.347970   -0.427494   -0.353651    11.00000   -1.50000
H38B  2    0.308205   -0.384986   -0.477500    11.00000   -1.50000
H38C  2    0.196155   -0.430522   -0.442892    11.00000   -1.50000
AFIX   0

CL1   3    0.662686   -0.068492   -0.485224    11.00000    0.05262    0.07221 =
         0.06689    0.02823    0.02248    0.00325
CL2   3    0.402588   -0.116971   -0.307375    11.00000    0.05159    0.06117 =
         0.07185    0.00935    0.03757    0.00972
CL3   3    0.564621   -0.329048   -0.180831    11.00000    0.04869    0.06416 =
         0.08462    0.01417    0.03647    0.00854
CL4   3    0.294497   -0.377481   -0.013963    11.00000    0.04938    0.05397 =
         0.06217    0.02318    0.01767   -0.00053
CU1   4    0.690724   -0.288947   -0.369139    11.00000    0.03652    0.03714 =
         0.03989   -0.00472    0.00261    0.00627
CU2   4    0.270372   -0.158342   -0.125169    11.00000    0.04260    0.03294 =
         0.04390   -0.00080    0.00818    0.00175
N1    5    0.657070   -0.365607   -0.482062    11.00000    0.04036    0.03529 =
         0.04658   -0.00112    0.01265   -0.00041
N2    5    0.847162   -0.337620   -0.266779    11.00000    0.02888    0.03328 =
         0.04289    0.00113    0.01135    0.00446
N3    5    0.321353   -0.077363   -0.025302    11.00000    0.05301    0.04182 =
         0.04153   -0.00145    0.01583   -0.00533
N4    5    0.107900   -0.111015   -0.223929    11.00000    0.03523    0.03185 =
         0.05063    0.00420    0.01372    0.00111
O1    6    0.546412   -0.232422   -0.467298    11.00000    0.04925    0.04486 =
         0.04378   -0.00566   -0.00403    0.01803
O2    6    0.745553   -0.206021   -0.278789    11.00000    0.04297    0.03212 =
         0.03151   -0.00216    0.00188    0.00068
O3    6    0.730040   -0.098647   -0.157833    11.00000    0.06826    0.04133 =
         0.05471   -0.00687    0.00285    0.01199
O4    6    0.410875   -0.215268   -0.027836    11.00000    0.05589    0.03651 =
         0.05296    0.00610   -0.00069    0.00592
O5    6    0.219517   -0.240057   -0.219700    11.00000    0.04402    0.03652 =
         0.04566    0.00233    0.00865    0.00333
O6    6    0.235885   -0.347594   -0.342840    11.00000    0.06005    0.04001 =
         0.06379   -0.00292    0.01457    0.01162
ZN1   7    0.595284   -0.141300   -0.361546    11.00000    0.03942    0.03994 =
         0.04817    0.00680    0.01644    0.00732
ZN2   7    0.366953   -0.305331   -0.135332    11.00000    0.03743    0.03755 =
         0.05287    0.00881    0.01773    0.00482
HKLF 4

REM  q in P 1 21 1 New: P21
REM R1 =  0.0718 for    6072 Fo > 4sig(Fo)  and  0.0830 for all    7370 data
REM    511 parameters refined using      1 restraints

END

WGHT      0.1049      0.0000

REM Highest difference peak  0.745,  deepest hole -1.032,  1-sigma level  0.129
Q1    1   0.3741 -0.1590 -0.0532  11.00000  0.05    0.74
Q2    1   0.1728 -0.1562 -0.1950  11.00000  0.05    0.71
Q3    1   0.3867 -0.2611 -0.1069  11.00000  0.05    0.69
Q4    1   0.5982 -0.2889 -0.4436  11.00000  0.05    0.67
Q5    1   0.7956 -0.2919 -0.3018  11.00000  0.05    0.65
Q6    1   0.2520 -0.2022 -0.1625  11.00000  0.05    0.63
Q7    1   0.2955 -0.1144 -0.0870  11.00000  0.05    0.58
Q8    1   0.6644 -0.2427 -0.4022  11.00000  0.05    0.58
Q9    1   0.2929 -0.2041 -0.1046  11.00000  0.05    0.57
Q10   1   0.7125 -0.2408 -0.3356  11.00000  0.05    0.56
Q11   1   0.4679 -0.2983 -0.0637  11.00000  0.05    0.56
Q12   1   0.6914 -0.1469 -0.2945  11.00000  0.05    0.56
Q13   1   0.5796 -0.1861 -0.3860  11.00000  0.05    0.55
Q14   1   0.6604 -0.3306 -0.4136  11.00000  0.05    0.55
Q15   1   0.2818 -0.2998 -0.2057  11.00000  0.05    0.54
Q16   1   0.6054 -0.0990 -0.3418  11.00000  0.05    0.53
Q17   1   0.5032 -0.1477 -0.4311  11.00000  0.05    0.51
Q18   1   0.3842 -0.1919  0.0135  11.00000  0.05    0.48
Q19   1   0.2301 -0.1179 -0.1678  11.00000  0.05    0.46
Q20   1   0.5831 -0.2544 -0.5125  11.00000  0.05    0.46
;
_shelx_res_checksum                93981
_shelx_hkl_file
;
   0   0  -1    3.74    0.57
   0   0  -1    7.66    0.63
   0   0  -2  126.14    3.05
   0   0  -2   53.29    2.67
   0   0  -2  104.20    3.11
   0   0  -3   22.55    1.74
   0   0  -3   10.73    1.81
   0   0  -3   19.25    1.82
   0   0  -4 1558.47   15.20
   0   0  -4  688.75   12.79
   0   0  -4 1394.67   16.08
   0   0  -5   59.26    3.48
   0   0  -5   26.33    3.29
   0   0  -6  438.49    9.80
   0   0  -6  206.05    8.87
   0   0   6  589.11   12.76
   0   0  -7   23.52    3.43
   0   0  -7   27.63    3.27
   0   0  -7   11.88    3.26
   0   0   7   32.16    4.11
   0   0  -8  452.58   13.23
   0   0  -8  247.23   11.54
   0   0   8  680.53   16.25
   0   0  -9   -0.92    2.08
   0   0  -9    3.93    3.23
   0   0 -10    2.26    3.19
   0   0 -11    3.18    3.52
   0   0 -12   10.42    5.37
   0  -1   0   -0.03    0.08
   0  -1   0    0.01    0.05
   0   1   0   -0.06    0.08
   0  -1  -1 3725.31   34.05
   0  -1   1 5356.68   51.61
   0   1  -1 3222.02   23.14
   0   1   1 2925.00   19.31
   0  -1  -2   25.64    1.66
   0  -1  -2   17.12    1.70
   0  -1   2   29.87    1.52
   0   1  -2   13.20    1.54
   0   1  -2   28.58    1.66
   0  -1  -3  136.45    4.20
   0  -1  -3   79.63    3.82
   0  -1   3  142.85    3.82
   0   1  -3   64.87    3.62
   0   1  -3  145.83    4.38
   0  -1  -4   77.80    3.67
   0  -1  -4   45.61    3.56
   0  -1   4   71.48    3.26
   0   1  -4   35.82    3.25
   0   1  -4   77.69    3.83
   0  -1  -5 1074.04   14.58
   0  -1  -5  602.96   13.35
   0   1  -5 1386.11   15.31
   0   1  -5  549.88   13.02
   0   1  -5 1152.09   16.04
   0  -1  -6    1.76    1.42
   0  -1  -6    0.35    1.47
   0   1  -6    3.55    1.54
   0   1  -6    1.04    1.59
   0   1  -6    3.73    1.85
   0   1   6    4.24    1.94
   0  -1  -7    6.04    2.10
   0  -1  -7    7.39    2.37
   0  -1  -7    7.33    2.67
   0   1  -7   12.39    2.76
   0   1  -7   14.24    2.45
   0   1  -7    6.67    2.89
   0   1   7   18.16    3.27
   0  -1  -8   27.41    4.05
   0  -1  -8   18.84    4.11
   0  -1   8   44.52    4.88
   0   1  -8   22.30    3.67
   0   1  -8   14.53    3.86
   0   1   8   45.57    5.03
   0  -1  -9  280.05   11.44
   0  -1  -9  166.33   10.14
   0   1  -9  146.26    9.72
   0   1   9  425.17   14.13
   0  -1 -10    2.31    3.28
   0   1 -10   -0.08    2.97
   0  -1 -11   17.16    5.36
   0   1 -11   15.21    4.99
   0  -1 -12    0.85    4.12
   0   1 -12    0.39    3.79
   0  -2   0 1440.77   11.62
   0  -2   0 1840.69   15.11
   0   2   0 2212.52   15.82
   0  -2  -1   60.36    2.27
   0  -2  -1   67.95    2.09
   0  -2   1   82.52    2.16
   0   2  -1   82.95    2.63
   0   2   1  115.37    3.18
   0  -2  -2    1.37    0.62
   0  -2  -2    0.64    0.70
   0  -2   2    2.05    0.58
   0   2  -2   -0.56    0.70
   0   2  -2    0.69    0.56
   0   2   2    1.33    0.73
   0  -2  -3   16.01    1.99
   0  -2   3   24.39    1.72
   0   2  -3    7.71    1.71
   0   2  -3   16.34    1.65
   0   2   3   24.29    2.20
   0  -2  -4 1039.73   13.76
   0  -2  -4  728.20   12.89
   0  -2   4 1196.12   12.64
   0   2  -4  510.17   11.37
   0   2  -4 1151.63   14.15
   0   2   4 1269.63   16.34
   0  -2  -5  306.53    8.23
   0  -2  -5  191.74    7.56
   0  -2   5  340.06    7.47
   0   2  -5  145.92    7.04
   0   2  -5  348.78    8.79
   0  -2  -6   27.05    3.19
   0  -2  -6   16.34    3.10
   0   2  -6   31.31    2.93
   0   2  -6    9.72    2.77
   0   2  -6   25.11    3.03
   0  -2  -7   71.29    5.37
   0  -2  -7   66.85    4.85
   0  -2  -7   40.00    4.60
   0   2  -7   64.00    4.91
   0   2  -7   28.51    4.38
   0   2  -7   70.42    5.07
   0  -2  -8  183.08    8.94
   0  -2  -8  109.20    7.81
   0   2  -8  178.49    8.37
   0   2  -8   84.79    7.15
   0  -2  -9    8.11    3.09
   0  -2  -9    5.50    3.30
   0   2  -9   -0.24    2.57
   0   2   9   11.69    4.16
   0  -2 -10    5.79    3.74
   0   2 -10    3.21    3.38
   0  -2 -11   -0.24    3.02
   0   2 -11    0.44    3.11
   0  -2 -12   18.76    5.99
   0   2 -12   16.65    5.80
   0  -3   0    0.54    0.37
   0  -3   0    2.31    0.50
   0   3   0    0.85    0.47
   0  -3  -1    0.42    0.55
   0  -3  -1    1.28    0.47
   0  -3   1    1.18    0.46
   0   3  -1    2.89    0.73
   0   3  -1    2.17    0.59
   0   3   1    3.27    0.81
   0  -3  -2  421.48    7.72
   0  -3  -2  422.65    7.07
   0  -3   2  576.51    7.30
   0   3  -2  408.72    7.86
   0   3   2  734.01   10.44
   0  -3  -3    7.16    1.39
   0  -3  -3    9.77    1.60
   0  -3   3    9.89    1.22
   0   3  -3    4.37    1.48
   0   3  -3    7.92    1.27
   0   3   3   12.89    1.89
   0  -3  -4   25.85    2.73
   0  -3   4   44.03    2.60
   0   3  -4   18.48    2.65
   0   3  -4   38.65    2.78
   0   3   4   51.68    3.62
   0  -3  -5   58.31    3.96
   0  -3  -5   48.85    4.06
   0  -3   5   79.66    3.75
   0   3  -5   32.20    3.69
   0   3  -5   67.69    4.03
   0   3   5   98.52    5.43
   0  -3  -6   59.98    4.74
   0  -3  -6   50.50    4.09
   0  -3  -6   35.94    4.01
   0  -3   6   59.17    3.65
   0   3  -6   22.69    3.72
   0   3  -6   59.04    4.26
   0   3   6   91.73    5.76
   0  -3  -7   60.62    5.09
   0  -3  -7   64.55    4.90
   0  -3  -7   44.67    4.86
   0   3  -7   64.25    4.90
   0   3  -7   26.61    4.54
   0   3  -7   71.49    5.18
   0   3   7   92.24    6.28
   0  -3  -8   11.63    3.01
   0  -3  -8    9.61    3.34
   0   3  -8   15.29    3.20
   0   3  -8    6.27    3.23
   0   3  -8   17.21    3.31
   0   3   8   14.54    3.55
   0  -3  -9    1.20    2.76
   0   3  -9    1.60    2.96
   0   3   9    0.61    1.89
   0   3   9    1.09    2.01
   0  -3 -10    7.29    3.65
   0   3 -10    3.59    3.69
   0  -3 -11    5.57    3.67
   0   3 -11    2.19    3.97
   0  -3 -12   -1.50    3.27
   0   3 -12   -1.59    4.06
   0  -4   0  342.27    6.49
   0  -4   0  463.49    6.56
   0   4   0  556.33    8.24
   0  -4  -1   58.77    3.00
   0  -4  -1   77.40    2.69
   0  -4   1   74.15    2.91
   0   4  -1   86.52    3.16
   0   4   1  117.69    4.12
   0  -4  -2   16.68    1.89
   0  -4  -2   22.79    1.82
   0  -4   2   28.31    1.83
   0   4  -2   28.81    2.40
   0   4  -2   27.82    1.97
   0   4   2   39.70    2.76
   0  -4  -3  290.94    7.62
   0  -4  -3  295.70    7.16
   0  -4   3  410.37    7.10
   0   4  -3  238.27    7.28
   0   4  -3  298.66    6.68
   0   4   3  548.97   10.73
   0  -4  -4   99.61    4.94
   0  -4  -4   86.64    4.56
   0  -4   4  124.97    4.27
   0   4  -4   63.77    4.41
   0   4  -4  124.14    4.82
   0   4   4  181.33    6.83
   0  -4  -5    4.02    1.30
   0  -4  -5   33.12    3.37
   0  -4   5   48.30    3.10
   0   4  -5   19.03    3.17
   0   4  -5   45.71    3.51
   0   4   5   64.91    4.74
   0   4   5   65.22    4.78
   0  -4  -6  150.28    7.06
   0  -4  -6  145.21    6.80
   0  -4  -6  136.80    7.15
   0  -4   6  219.81    6.62
   0   4  -6   84.28    6.24
   0   4  -6  206.15    7.53
   0   4   6  299.27   10.30
   0   4   6  291.19   10.10
   0  -4  -7    4.20    2.37
   0  -4  -7    5.05    2.08
   0  -4  -7    3.97    2.36
   0  -4   7    1.86    1.57
   0   4  -7    4.73    2.07
   0   4  -7    1.86    2.55
   0   4  -7    4.59    2.17
   0   4   7    3.74    2.37
   0   4   7    5.75    2.58
   0  -4  -8   15.64    3.33
   0  -4  -8   12.75    3.63
   0   4  -8   10.77    3.69
   0   4  -8   18.43    3.36
   0   4   8   19.10    4.24
   0   4   8   29.25    4.94
   0  -4  -9   20.47    4.56
   0   4  -9   14.07    4.40
   0   4   9   49.01    5.97
   0   4   9   45.65    6.05
   0  -4 -10    5.33    3.42
   0   4 -10    5.03    3.64
   0  -4 -11   -1.61    2.63
   0   4 -11    0.71    3.53
   0  -4 -12   -0.14    3.25
   0   4 -12   -0.43    4.09
   0  -5   0    0.83    0.64
   0  -5   0    1.60    0.67
   0   5   0   -0.03    0.54
   0  -5  -1 1135.21   14.06
   0  -5  -1 1492.37   13.34
   0  -5   1 1431.29   14.41
   0   5  -1 1688.36   15.82
   0   5   1 2058.25   19.04
   0  -5  -2    1.69    0.93
   0  -5  -2    1.44    0.70
   0  -5   2    1.19    0.64
   0   5  -2    2.92    1.20
   0   5  -2    2.77    1.01
   0   5   2    7.00    1.53
   0  -5  -3   74.47    4.19
   0  -5  -3   79.31    3.86
   0  -5   3  104.65    3.92
   0   5  -3   75.84    4.35
   0   5  -3   76.56    3.66
   0   5   3  142.26    5.88
   0  -5  -4   19.80    2.61
   0  -5  -4   18.30    2.42
   0  -5   4   27.05    2.34
   0   5  -4   13.74    2.64
   0   5  -4   24.86    2.44
   0   5   4   30.41    3.30
   0  -5  -5  777.46   15.01
   0  -5  -5  760.79   14.82
   0  -5   5 1068.41   13.72
   0   5  -5  461.25   12.84
   0   5  -5  944.77   14.73
   0   5   5 1421.29   21.28
   0   5   5 1434.79   21.37
   0  -5  -6    6.63    2.34
   0  -5  -6    6.81    2.06
   0  -5  -6   13.02    2.82
   0  -5   6   19.87    2.45
   0   5  -6    8.44    2.93
   0   5  -6   17.09    2.73
   0   5   6   30.74    4.15
   0   5   6   33.73    4.16
   0  -5  -7    2.73    2.05
   0  -5  -7    2.39    1.82
   0  -5  -7    3.13    2.18
   0   5  -7    3.59    2.05
   0   5  -7    0.57    2.57
   0   5  -7    3.22    1.89
   0   5   7    5.55    2.76
   0   5   7    6.76    3.16
   0  -5  -8   -0.24    2.32
   0  -5  -8   -0.04    1.81
   0  -5  -8   -0.22    1.76
   0   5  -8    5.69    3.51
   0   5  -8    3.76    2.35
   0   5   8   -0.02    2.76
   0   5   8    2.43    3.14
   0  -5  -9   27.47    4.96
   0   5  -9    9.18    4.08
   0   5   9   45.56    6.13
   0   5   9   50.40    6.62
   0  -5 -10   16.46    4.61
   0   5 -10    8.99    4.38
   0   5  10   28.59    5.79
   0   5  10   39.97    6.53
   0  -5 -11    3.54    3.56
   0   5 -11   -0.52    3.39
   0  -5 -12    4.21    4.18
   0   5 -12    6.07    4.64
   0  -5 -13   10.45    6.16
   0  -6   0  279.49    7.17
   0  -6   0  400.52    7.34
   0   6   0  447.73    8.99
   0  -6  -1   73.37    3.92
   0  -6  -1  106.75    3.75
   0  -6   1   96.68    4.10
   0   6  -1  114.20    4.49
   0   6   1  135.83    5.27
   0  -6  -2  461.87   10.26
   0  -6  -2  579.06    9.36
   0  -6   2  627.10   10.15
   0   6  -2  732.60   12.16
   0   6  -2  529.42    9.61
   0   6   2  892.21   14.29
   0  -6  -3   90.30    4.88
   0  -6  -3  112.36    4.72
   0  -6   3  132.57    4.76
   0   6  -3  102.72    5.21
   0   6  -3  123.94    4.93
   0   6   3  189.84    7.16
   0  -6  -4 1417.73   20.12
   0  -6  -4 1627.17   19.72
   0  -6   4 2060.14   19.23
   0   6  -4 1165.47   18.96
   0   6  -4  826.91   13.24
   0   6   4 2700.74   28.49
   0   6   4 2764.53   28.91
   0  -6  -5   12.29    2.78
   0  -6  -5   10.64    2.44
   0  -6  -5   10.04    2.38
   0  -6   5   15.24    2.17
   0   6  -5    7.57    2.58
   0   6  -5   10.91    2.20
   0   6   5   22.26    3.52
   0   6   5   20.30    3.50
   0  -6  -6   44.86    4.65
   0  -6  -6   32.88    3.93
   0  -6  -6   34.42    3.91
   0  -6   6   49.73    3.59
   0   6  -6   27.49    4.30
   0   6  -6   53.54    4.25
   0   6   6   73.71    5.91
   0   6   6   69.58    5.79
   0  -6  -7   14.25    3.12
   0  -6  -7   19.00    3.35
   0  -6  -7   22.84    3.96
   0   6  -7   27.58    3.75
   0   6  -7    9.96    3.61
   0   6  -7   21.36    3.38
   0   6   7   32.75    4.84
   0   6   7   34.44    5.09
   0  -6  -8  169.30    9.38
   0   6  -8   88.85    7.91
   0   6   8  303.66   12.59
   0   6   8  300.23   12.53
   0  -6  -9   -0.61    2.09
   0   6  -9   -1.33    3.34
   0   6   9    2.88    3.64
   0   6   9    5.59    4.01
   0  -6 -10   37.97    6.04
   0   6 -10   27.35    6.12
   0   6  10   72.67    7.98
   0   6  10   81.41    8.52
   0  -6 -11    0.57    3.38
   0   6 -11   -2.14    3.33
   0  -6 -12   26.74    6.40
   0   6 -12   22.26    6.66
   0  -7   0    0.33    0.64
   0   7   0   -0.39    0.63
   0  -7  -1  316.03    8.59
   0  -7  -1  482.87    8.51
   0  -7   1  406.20    9.03
   0   7  -1  534.90   10.37
   0   7   1  606.78   11.86
   0  -7  -2  580.33   12.23
   0  -7  -2  722.05   10.98
   0  -7   2  735.71   11.93
   0   7  -2  942.18   14.44
   0   7  -2  827.61   12.93
   0   7   2 1063.26   16.58
   0  -7  -3  361.26   10.16
   0  -7  -3  454.42    9.56
   0  -7   3  536.96   10.17
   0   7  -3  463.84   11.23
   0   7  -3  537.30   10.71
   0   7   3  735.27   14.68
   0  -7  -4  128.09    6.55
   0  -7  -4  120.11    6.32
   0  -7  -4  148.28    6.15
   0  -7   4  193.21    6.30
   0   7  -4  113.90    6.38
   0   7  -4  170.22    6.42
   0   7   4  242.59    9.27
   0   7   4  255.80    9.40
   0  -7  -5  609.41   14.62
   0  -7  -5  589.09   14.36
   0  -7  -5  690.99   14.39
   0  -7   5  920.23   13.91
   0   7  -5  431.60   12.96
   0   7  -5  815.02   14.54
   0   7   5 1210.96   21.16
   0   7   5 1204.77   21.19
   0  -7  -6   81.60    6.01
   0  -7  -6   75.21    5.59
   0  -7  -6   84.93    5.74
   0  -7   6  115.92    5.37
   0   7  -6   49.63    5.64
   0   7  -6   98.42    5.68
   0   7   6  157.03    8.35
   0   7   6  169.01    8.88
   0  -7  -7  283.62   11.15
   0  -7  -7  287.49   11.24
   0  -7  -7  303.03   11.44
   0   7  -7  391.56   11.57
   0   7  -7  157.73    9.66
   0   7  -7  394.75   11.54
   0   7   7  586.64   16.70
   0   7   7  600.99   17.05
   0  -7  -8   31.22    4.62
   0  -7  -8   29.33    4.50
   0  -7  -8   33.13    4.83
   0   7  -8   15.35    4.50
   0   7   8   69.21    6.95
   0   7   8   68.64    7.26
   0  -7  -9   44.44    5.91
   0   7  -9   23.14    5.63
   0   7   9   81.96    7.89
   0   7   9   84.55    8.36
   0  -7 -10   -0.96    2.53
   0   7 -10    2.28    3.96
   0   7  10    2.43    4.06
   0   7  10   -1.08    4.35
   0  -7 -11    0.81    3.23
   0   7 -11    0.27    4.08
   0  -7 -12    2.60    4.12
   0  -8   0  248.33    7.83
   0   8   0  533.62    9.71
   0   8   0  412.21   10.04
   0  -8  -1   21.15    2.60
   0  -8  -1   33.10    2.55
   0  -8   1   30.14    2.81
   0   8  -1   36.23    2.88
   0   8  -1   38.84    3.22
   0   8   1   42.93    3.60
   0  -8  -2    0.69    0.97
   0  -8  -2    1.32    1.04
   0  -8   2   -0.62    0.80
   0   8  -2    1.62    1.29
   0   8  -2   -0.41    0.84
   0   8   2    0.32    1.14
   0  -8  -3  265.75    9.31
   0  -8  -3  268.21    9.26
   0  -8  -3  356.79    8.74
   0  -8   3  422.87    9.68
   0   8  -3  384.43   10.62
   0   8  -3  407.71    9.90
   0   8   3  551.69   13.36
   0   8   3  567.99   13.53
   0  -8  -4  950.40   18.16
   0  -8  -4  935.65   17.97
   0  -8  -4 1209.57   17.57
   0  -8   4 1482.59   18.26
   0   8  -4 1052.22   18.98
   0   8  -4 1329.68   18.40
   0   8   4 1949.69   26.37
   0   8   4 2001.46   26.79
   0  -8  -5   15.22    3.06
   0  -8  -5   18.98    3.22
   0  -8  -5   22.89    3.14
   0  -8   5   23.72    2.81
   0   8  -5   15.27    3.41
   0   8  -5   13.34    2.47
   0   8   5   44.34    4.99
   0   8   5   50.44    5.15
   0  -8  -6    9.72    2.72
   0  -8  -6    7.48    2.56
   0  -8  -6    8.46    2.61
   0  -8   6    7.97    2.16
   0   8  -6   10.54    2.65
   0   8  -6    1.73    2.79
   0   8  -6    9.36    2.49
   0   8   6    9.57    3.22
   0   8   6    9.18    3.48
   0  -8  -7    5.02    2.53
   0  -8  -7    2.74    2.35
   0  -8  -7    3.47    2.20
   0   8  -7    2.02    3.13
   0   8  -7    4.74    2.57
   0   8   7    9.20    3.47
   0   8   7    6.19    3.65
   0  -8  -8  101.30    7.71
   0  -8  -8  101.36    7.60
   0  -8  -8   99.02    7.53
   0   8  -8   58.66    6.91
   0   8   8  221.14   11.58
   0   8   8  206.29   11.38
   0  -8  -9   88.00    7.60
   0  -8  -9   85.11    7.45
   0  -8  -9   91.08    7.69
   0   8  -9   50.87    7.22
   0   8   9  197.03   11.37
   0   8   9  216.30   12.28
   0  -8 -10    9.91    4.14
   0   8 -10    8.59    4.93
   0   8  10   19.48    5.78
   0   8  10   15.90    5.91
   0  -8 -11    0.73    3.33
   0   8 -11   -2.50    3.88
   0   8  11    6.68    5.33
   0  -9   0    1.15    0.98
   0   9   0    1.32    1.23
   0   9   0    0.79    1.22
   0  -9  -1   19.40    2.82
   0  -9  -1   21.18    2.80
   0  -9  -1   31.02    2.65
   0  -9   1   24.85    2.75
   0   9  -1   34.87    3.11
   0   9  -1   23.94    2.79
   0   9   1   34.75    3.49
   0   9   1   34.76    3.52
   0  -9  -2   20.54    3.02
   0  -9  -2   19.23    2.89
   0  -9  -2   26.60    2.63
   0  -9   2   26.41    2.81
   0   9  -2   34.71    3.31
   0   9  -2   30.80    3.17
   0   9   2   41.48    3.90
   0   9   2   37.04    3.74
   0  -9  -3  358.22   11.25
   0  -9  -3  360.01   11.23
   0  -9  -3  485.97   10.56
   0  -9   3  527.80   11.51
   0   9  -3  517.20   12.71
   0   9  -3  533.33   11.97
   0   9   3  737.43   15.96
   0   9   3  729.73   16.10
   0  -9  -4  129.70    7.19
   0  -9  -4  119.20    6.83
   0  -9  -4  171.32    6.84
   0  -9   4  205.14    7.27
   0   9  -4  158.62    7.82
   0   9  -4  211.70    7.83
   0   9   4  299.04   10.88
   0   9   4  284.20   10.62
   0  -9  -5   55.62    5.04
   0  -9  -5   58.34    5.32
   0  -9  -5   69.19    4.95
   0  -9   5   89.93    5.03
   0   9  -5   83.85    5.49
   0   9  -5   56.98    5.64
   0   9  -5   84.91    5.33
   0   9   5  128.00    7.77
   0   9   5  128.61    7.96
   0  -9  -6   16.71    3.44
   0  -9  -6   19.04    3.61
   0  -9  -6   22.16    3.49
   0  -9   6   25.74    3.17
   0   9  -6   27.55    3.70
   0   9  -6    9.42    3.52
   0   9  -6   22.09    3.31
   0   9   6   31.10    4.81
   0   9   6   37.34    5.25
   0  -9  -7   33.45    4.76
   0  -9  -7   37.64    4.96
   0  -9  -7   39.59    4.74
   0   9  -7   19.50    4.60
   0   9  -7   45.51    4.57
   0   9   7   83.49    7.58
   0   9   7   76.90    7.38
   0  -9  -8  167.93    9.80
   0  -9  -8  164.57    9.77
   0  -9  -8  179.54    9.89
   0   9  -8   90.09    8.45
   0   9   8  362.53   14.96
   0   9   8  353.22   14.71
   0  -9  -9   55.33    6.51
   0  -9  -9   51.14    6.28
   0  -9  -9   65.75    6.76
   0   9  -9   26.42    5.86
   0   9   9  118.39    9.73
   0   9   9  120.37    9.64
   0  -9 -10    7.82    3.88
   0   9 -10    3.57    4.36
   0   9  10    5.79    5.21
   0   9  10    7.20    5.03
   0   9 -11   12.99    6.13
   0   9  11   45.70    8.34
   0 -10   0  150.32    6.96
   0 -10   0  150.13    6.90
   0  10   0  228.10    8.52
   0  10   0  313.86    8.44
   0  10   0  226.57    8.47
   0 -10  -1    2.36    1.43
   0 -10  -1    2.83    1.48
   0 -10  -1    5.09    1.47
   0 -10   1    6.40    1.96
   0 -10   1    3.86    1.54
   0  10  -1    5.87    2.08
   0  10  -1    5.81    1.88
   0  10  -1    4.51    1.73
   0  10   1    5.21    2.02
   0  10   1    6.79    2.21
   0 -10  -2  301.84   10.41
   0 -10  -2  293.64   10.24
   0 -10  -2  434.92    9.85
   0 -10   2  372.03   10.36
   0  10  -2  459.44   11.69
   0  10  -2  369.15   10.32
   0  10  -2  440.85   11.40
   0  10   2  554.58   14.04
   0  10   2  570.37   14.25
   0 -10  -3    2.60    1.69
   0 -10  -3    3.18    1.62
   0 -10  -3    5.18    1.69
   0 -10   3    3.70    1.54
   0  10  -3    8.27    2.26
   0  10  -3    4.92    2.16
   0  10  -3    6.62    2.11
   0  10   3    6.74    2.41
   0 -10  -4    3.74    1.96
   0 -10  -4    4.98    2.18
   0 -10  -4    8.66    2.07
   0 -10   4    9.12    2.06
   0  10  -4    5.79    2.22
   0  10  -4    5.51    2.32
   0  10  -4    6.63    2.19
   0  10   4   12.50    3.25
   0  10   4   15.42    3.63
   0 -10  -5    3.60    2.16
   0 -10  -5    3.35    2.14
   0 -10  -5    3.10    1.66
   0 -10   5    2.95    1.80
   0  10  -5    7.43    2.42
   0  10  -5    4.34    2.62
   0  10  -5    5.51    2.15
   0  10   5    7.26    2.83
   0  10   5    4.24    2.66
   0 -10  -6   10.20    3.06
   0 -10  -6   13.60    3.29
   0 -10  -6   14.30    3.05
   0  10  -6   11.70    2.87
   0  10  -6    5.99    3.45
   0  10  -6   21.53    3.35
   0  10   6   18.45    4.20
   0  10   6   19.04    4.38
   0 -10  -7   15.26    3.68
   0 -10  -7   15.76    3.80
   0 -10  -7   19.36    3.80
   0  10  -7    7.90    3.87
   0  10   7   25.26    5.05
   0  10   7   31.34    5.49
   0 -10  -8   44.90    5.84
   0 -10  -8   47.24    5.89
   0 -10  -8   44.48    5.32
   0  10  -8   21.58    5.38
   0  10   8   92.69    8.64
   0  10   8   93.84    8.77
   0 -10  -9   33.36    5.56
   0 -10  -9   36.80    5.51
   0 -10  -9   43.83    6.08
   0  10  -9   13.49    5.20
   0  10   9   76.91    8.74
   0  10   9   94.05    9.35
   0  10 -10   -0.86    4.21
   0  10  10    3.00    4.03
   0  10  10    7.74    5.37
   0  10 -11   -1.35    4.16
   0  10  11   -6.88    4.32
   0  10  11    6.67    6.31
   0 -11   0    0.52    1.24
   0 -11   0   -0.56    0.82
   0  11   0    0.82    1.41
   0  11   0    1.26    1.38
   0  11   0    0.41    1.14
   0 -11  -1  133.29    7.19
   0 -11  -1  138.27    7.21
   0 -11  -1  190.21    6.82
   0 -11   1  148.30    7.13
   0 -11   1  152.50    7.23
   0  11  -1  203.89    8.31
   0  11  -1  265.96    8.59
   0  11  -1  196.59    8.20
   0  11   1  231.41    9.27
   0  11   1  215.42    8.95
   0 -11  -2   28.35    3.80
   0 -11  -2   21.48    3.29
   0 -11  -2   36.03    3.27
   0 -11   2   33.95    3.83
   0 -11   2   34.80    3.58
   0  11  -2   42.42    4.21
   0  11  -2   35.63    3.72
   0  11   2   49.43    4.68
   0  11   2   42.88    4.41
   0 -11  -3   73.85    5.69
   0 -11  -3   65.47    5.45
   0 -11  -3   97.06    5.23
   0 -11   3  102.24    5.97
   0 -11   3   97.67    5.72
   0  11  -3  103.10    6.12
   0  11  -3  108.56    6.49
   0  11  -3  105.59    6.06
   0  11   3  137.20    7.53
   0  11   3  137.73    7.92
   0 -11  -4    5.47    2.31
   0 -11  -4    7.64    2.64
   0 -11  -4   10.37    2.38
   0 -11   4   12.54    2.77
   0 -11   4   10.39    2.36
   0  11  -4   12.57    2.81
   0  11  -4   10.03    2.96
   0  11  -4   12.56    2.70
   0  11   4   15.32    3.68
   0  11   4   14.06    3.63
   0 -11  -5   19.95    3.83
   0 -11  -5   29.40    4.28
   0 -11  -5   29.36    3.76
   0 -11   5   35.72    4.13
   0 -11   5   30.82    3.63
   0  11  -5   33.28    4.00
   0  11  -5   27.07    4.66
   0  11  -5   26.42    3.58
   0  11   5   55.38    5.65
   0  11   5   54.09    5.84
   0 -11  -6   14.76    3.59
   0 -11  -6   15.81    3.62
   0 -11  -6   25.81    3.86
   0  11  -6   29.63    4.08
   0  11  -6   18.22    4.51
   0  11  -6   16.62    3.24
   0  11   6   47.66    5.55
   0  11   6   40.14    5.76
   0 -11  -7   11.35    3.58
   0 -11  -7   10.65    3.40
   0 -11  -7    9.27    3.15
   0  11  -7    6.67    3.64
   0  11   7   26.57    5.32
   0  11   7   23.76    5.41
   0 -11  -8   24.49    4.97
   0 -11  -8   28.83    5.26
   0 -11  -8   35.00    5.10
   0  11  -8   11.22    4.53
   0  11   8   54.59    7.16
   0  11   8   55.81    7.65
   0 -11  -9   -2.80    2.63
   0 -11  -9   -1.17    2.67
   0  11  -9    2.80    4.06
   0  11   9   -0.71    3.77
   0  11   9   -0.29    3.88
   0  11 -10    0.25    4.20
   0  11  10    4.57    4.74
   0  11  10    1.06    5.38
   0  11 -11    2.80    5.10
   0  11  11   15.15    6.57
   0  11  11   16.38    7.21
   0 -12   0  331.19   11.33
   0 -12   0  339.50   11.43
   0  12   0  481.55   13.64
   0  12   0  650.86   13.29
   0  12   0  481.63   13.56
   0 -12  -1   32.59    4.01
   0 -12  -1   28.28    3.87
   0 -12  -1   44.04    3.70
   0 -12   1   36.23    4.06
   0 -12   1   29.23    3.58
   0  12  -1   46.92    4.47
   0  12  -1   61.63    4.67
   0  12  -1   48.74    4.61
   0  12   1   57.57    5.19
   0  12   1   52.34    4.84
   0 -12  -2   32.20    3.98
   0 -12  -2   36.80    4.27
   0 -12  -2   49.98    3.93
   0 -12   2   44.25    4.36
   0 -12   2   40.29    3.97
   0  12  -2   42.77    4.43
   0  12  -2   49.25    4.59
   0  12   2   63.62    5.47
   0  12   2   57.17    5.29
   0 -12  -3  221.26   10.11
   0 -12  -3  230.30   10.30
   0 -12  -3  340.38    9.88
   0 -12   3  347.51   11.11
   0 -12   3  334.17   10.80
   0  12  -3  387.39   11.98
   0  12  -3  388.48   12.17
   0  12  -3  369.59   11.59
   0  12   3  439.38   14.14
   0  12   3  451.91   14.42
   0 -12  -4   70.43    6.09
   0 -12  -4   66.56    6.05
   0 -12  -4  101.92    5.84
   0 -12   4  110.44    6.40
   0 -12   4  103.59    6.10
   0  12  -4  110.07    6.65
   0  12  -4   90.29    6.77
   0  12  -4  107.47    6.49
   0  12   4  126.53    8.11
   0  12   4  138.01    8.62
   0 -12  -5   27.50    4.39
   0 -12  -5   25.08    4.18
   0 -12  -5   35.99    4.02
   0 -12   5   44.85    4.40
   0  12  -5   41.77    4.63
   0  12  -5   30.44    4.75
   0  12  -5   46.61    4.69
   0  12   5   62.64    6.20
   0  12   5   64.34    6.73
   0 -12  -6   49.75    5.83
   0 -12  -6   47.02    5.52
   0 -12  -6   63.65    5.38
   0  12  -6   31.04    5.46
   0  12   6  104.05    8.07
   0  12   6   97.35    8.09
   0 -12  -7    9.35    3.55
   0 -12  -7    6.77    3.11
   0  12  -7    5.49    3.89
   0  12   7   16.51    4.81
   0  12   7   17.04    5.23
   0 -12  -8   68.58    7.34
   0  12  -8   45.53    7.13
   0  12   8  152.62   10.92
   0  12   8  155.79   11.03
   0 -12  -9   12.45    4.43
   0 -12  -9    3.99    3.35
   0  12  -9    7.15    4.71
   0  12   9   13.33    5.15
   0  12   9   18.06    6.38
   0 -12 -10   12.35    4.73
   0  12 -10    5.65    5.35
   0  12  10   14.54    5.87
   0  12  10   20.66    7.12
   0  12  11   20.89    7.11
   0  12  11   24.93    8.11
   0  12  12   13.96    7.04
   0 -13   0    1.34    1.91
   0 -13   0    0.59    1.40
   0  13   0    1.66    1.93
   0  13   0    5.47    2.21
   0  13   0    2.00    1.96
   0 -13  -1  112.74    7.30
   0 -13  -1  111.09    7.15
   0 -13   1  128.54    7.39
   0 -13   1  124.19    7.17
   0  13  -1  169.69    8.44
   0  13  -1  212.50    8.43
   0  13  -1  155.12    8.10
   0  13   1  176.30    9.03
   0  13   1  182.20    9.05
   0 -13  -2  331.28   12.53
   0 -13  -2  312.47   12.08
   0 -13  -2  474.91   11.73
   0 -13   2  395.79   12.57
   0 -13   2  396.20   12.50
   0  13  -2  482.10   13.89
   0  13  -2  463.53   13.59
   0  13   2  561.65   16.12
   0  13   2  558.55   16.12
   0 -13  -3  141.39    8.54
   0 -13  -3  145.97    8.59
   0 -13  -3  222.24    8.29
   0 -13   3  202.46    8.99
   0 -13   3  204.99    8.96
   0  13  -3  224.35    9.65
   0  13  -3  210.87    9.44
   0  13  -3  223.61    9.55
   0  13   3  283.21   12.03
   0  13   3  270.12   11.68
   0 -13  -4   31.66    4.61
   0 -13  -4   33.53    4.75
   0 -13  -4   50.44    4.53
   0 -13   4   48.74    4.82
   0 -13   4   45.69    4.44
   0  13  -4   49.02    4.89
   0  13  -4   44.23    5.27
   0  13  -4   42.89    4.52
   0  13   4   89.30    6.20
   0  13   4   70.47    6.82
   0 -13  -5   47.24    5.65
   0 -13  -5   50.60    5.67
   0 -13  -5   77.12    5.65
   0 -13   5   88.13    6.07
   0  13  -5   83.37    6.30
   0  13  -5   54.23    5.92
   0  13  -5   81.83    6.26
   0  13   5   97.41    7.95
   0  13   5  101.74    8.15
   0 -13  -6   30.58    5.08
   0 -13  -6   34.86    5.17
   0  13  -6   29.46    5.26
   0  13   6   64.70    7.10
   0  13   6   75.91    7.79
   0 -13  -7   12.58    3.84
   0 -13  -7   13.99    4.07
   0  13  -7   10.48    4.53
   0  13   7   20.65    5.25
   0  13   7   36.14    6.67
   0 -13  -8   10.68    4.02
   0 -13  -8    9.62    3.70
   0  13  -8    3.59    3.85
   0  13   8   18.44    5.30
   0  13   8   22.92    6.32
   0 -13  -9   72.26    8.25
   0 -13  -9   80.82    8.38
   0  13  -9   34.68    7.12
   0  13   9  159.82   11.99
   0  13   9  151.02   12.23
   0 -13 -10   25.73    5.96
   0  13 -10   14.55    6.08
   0  13  10   57.55    8.90
   0  13  10   60.92    9.62
   0  13  11    4.25    5.78
   0  13  11    7.65    6.73
   0 -14   0  188.14    9.46
   0 -14   0  179.87    9.17
   0  14   0  270.13   11.20
   0  14   0  372.88   11.09
   0  14   0  254.16   10.93
   0 -14  -1  225.71   10.48
   0 -14  -1  226.75   10.49
   0 -14   1  238.76   10.43
   0 -14   1  252.82   10.68
   0  14  -1  322.40   12.13
   0  14  -1  423.04   12.22
   0  14  -1  312.41   11.81
   0  14   1  355.85   13.15
   0  14   1  452.47   11.89
   0  14   1  349.20   12.95
   0 -14  -2   51.39    5.50
   0 -14  -2   48.31    5.19
   0 -14  -2   74.60    5.14
   0 -14   2   58.27    5.41
   0 -14   2   58.75    5.32
   0  14  -2   72.74    6.05
   0  14  -2   74.46    5.69
   0  14  -2   73.12    6.07
   0  14   2   90.73    7.14
   0  14   2   72.38    6.55
   0 -14  -3  139.71    8.76
   0 -14  -3  131.31    8.52
   0 -14  -3  194.19    8.13
   0 -14   3  200.82    9.39
   0 -14   3  184.42    8.92
   0  14  -3  202.55    9.60
   0  14  -3  201.98    9.61
   0  14  -3  195.25    9.43
   0  14   3  245.36   11.63
   0  14   3  250.36   11.66
   0 -14  -4   85.49    7.26
   0 -14  -4   70.65    6.53
   0 -14   4  116.53    7.23
   0 -14   4  123.02    7.34
   0  14  -4  108.56    7.21
   0  14  -4  100.12    7.51
   0  14  -4   79.39    6.22
   0  14   4  166.58    9.47
   0  14   4  148.13    9.68
   0 -14  -5    0.38    2.20
   0 -14  -5    0.89    2.17
   0  14  -5    0.43    2.21
   0  14  -5   -1.43    2.60
   0  14  -5    1.24    2.25
   0  14   5    4.72    2.95
   0  14   5    1.63    3.31
   0 -14  -6   11.39    3.70
   0 -14  -6   13.81    3.98
   0  14  -6   11.31    4.35
   0  14   6   17.64    5.02
   0  14   6   20.13    5.46
   0 -14  -7  100.21    8.61
   0 -14  -7   81.63    7.95
   0  14  -7   48.67    7.05
   0  14   7  181.51   11.62
   0  14   7  182.37   11.93
   0 -14  -8  128.69   10.03
   0  14  -8   75.50    8.76
   0  14   8  253.63   14.36
   0  14   8  273.72   15.21
   0 -14  -9    7.59    4.29
   0 -14  -9   10.51    4.44
   0  14  -9    5.36    4.74
   0  14   9   27.59    6.83
   0  14   9   20.09    6.96
   0 -14 -10    0.50    3.56
   0  14 -10    2.83    4.68
   0  14  10    6.15    5.29
   0  14  10   10.80    6.88
   0  14  11   15.27    6.64
   0 -15   0    0.32    1.47
   0 -15   0    0.96    1.78
   0  15   0    1.31    2.41
   0  15   0    1.60    2.20
   0  15   0    0.28    2.03
   0 -15  -1   14.27    3.55
   0 -15  -1   14.46    3.45
   0 -15   1   15.45    3.41
   0 -15   1   15.10    3.32
   0  15  -1   21.41    4.03
   0  15  -1   32.82    4.25
   0  15  -1   21.59    4.23
   0  15   1   21.18    4.36
   0  15   1   18.84    4.19
   0 -15  -2  197.37   10.55
   0 -15  -2  187.39   10.17
   0 -15  -2  279.55    9.82
   0 -15   2  227.07   10.52
   0 -15   2  219.83   10.24
   0  15  -2  286.58   11.86
   0  15  -2  337.27   11.91
   0  15  -2  283.08   11.76
   0  15   2  327.67   13.40
   0  15   2  329.65   13.50
   0 -15  -3  121.94    8.54
   0 -15  -3  116.38    8.48
   0 -15   3  156.17    8.74
   0 -15   3  156.67    8.63
   0  15  -3  200.52    9.99
   0  15  -3  143.21    8.47
   0  15  -3  170.77    9.23
   0  15   3  233.48   11.72
   0  15   3  225.74   11.55
   0 -15  -4    6.16    2.83
   0 -15  -4    4.97    2.77
   0 -15   4    8.35    2.88
   0 -15   4    8.44    2.78
   0  15  -4    8.03    3.27
   0  15  -4   11.10    3.75
   0  15  -4    7.95    3.03
   0  15   4   11.78    3.87
   0  15   4    5.78    3.49
   0 -15  -5   22.91    4.68
   0 -15  -5   23.47    4.64
   0  15  -5   41.56    5.34
   0  15  -5   22.62    4.66
   0  15  -5   37.78    5.13
   0  15   5   41.32    6.30
   0  15   5   55.86    7.38
   0 -15  -6   49.90    6.59
   0 -15  -6   52.56    6.47
   0  15  -6   36.15    5.90
   0  15   6   86.69    8.34
   0  15   6  105.64    9.23
   0 -15  -7   40.28    6.30
   0 -15  -7   39.32    6.17
   0  15  -7   25.41    5.62
   0  15   7   83.53    8.40
   0  15   7   76.75    8.56
   0 -15  -8    8.39    4.12
   0 -15  -8    9.69    4.18
   0  15  -8    6.03    4.76
   0  15   8   14.19    5.45
   0  15   8   16.60    6.29
   0 -15  -9   31.27    6.39
   0 -15  -9   27.18    5.79
   0  15  -9   10.41    5.50
   0  15   9   43.87    7.82
   0  15   9   60.14    9.46
   0 -15 -10   16.83    5.62
   0 -15 -10   17.07    5.58
   0  15  10   30.10    7.06
   0  15  10   32.62    8.51
   0  15  11   11.85    6.23
   0 -16   0    0.23    1.87
   0 -16   0    0.28    1.75
   0  16   0    0.89    2.56
   0  16   0   -1.49    2.26
   0 -16  -1    2.95    2.30
   0 -16  -1    6.04    2.75
   0 -16   1    3.87    2.59
   0 -16   1    4.76    2.38
   0  16  -1    1.75    2.60
   0  16  -1    1.61    2.26
   0  16  -1    1.17    2.44
   0  16   1    2.35    2.49
   0  16   1    3.61    2.71
   0 -16  -2    6.58    2.72
   0 -16  -2    7.18    2.94
   0 -16   2   14.36    3.56
   0 -16   2   10.64    3.12
   0  16  -2   12.98    3.78
   0  16  -2   12.68    3.54
   0  16  -2   14.40    3.87
   0  16   2   11.63    4.03
   0  16   2   11.42    3.79
   0 -16  -3   20.81    4.34
   0 -16  -3   26.08    4.72
   0 -16   3   30.36    4.81
   0 -16   3   27.81    4.39
   0  16  -3   31.94    5.21
   0  16  -3    4.14    2.40
   0  16  -3   30.48    4.76
   0  16   3   42.87    6.11
   0  16   3   37.84    5.99
   0 -16  -4   44.52    6.02
   0 -16  -4   40.49    5.88
   0 -16   4   52.30    5.69
   0 -16   4   50.85    5.43
   0  16  -4   54.56    5.79
   0  16  -4   49.42    6.06
   0  16   4   77.35    7.35
   0  16   4   74.07    7.76
   0 -16  -5    2.26    2.43
   0 -16  -5    2.41    2.78
   0  16  -5    5.02    3.20
   0  16  -5    0.54    2.65
   0  16  -5    6.09    3.27
   0  16   5   11.62    4.76
   0 -16  -6   10.34    3.91
   0 -16  -6   13.87    4.46
   0  16  -6    5.66    3.97
   0  16   6   22.62    5.53
   0  16   6   24.42    6.23
   0 -16  -7    9.93    4.15
   0 -16  -7   10.40    4.04
   0  16  -7    6.51    4.49
   0  16   7   21.17    5.50
   0  16   7   24.10    6.36
   0 -16  -8    1.65    3.40
   0 -16  -8    4.44    3.81
   0  16  -8    6.97    4.54
   0  16   8    6.62    4.13
   0  16   8    6.83    4.96
   0 -16  -9    6.22    4.49
   0 -16  -9   12.12    5.00
   0  16  -9    7.50    5.03
   0  16   9   24.12    6.52
   0  16   9   32.00    7.77
   0 -16 -10    2.13    4.14
   0 -16 -10    1.17    4.08
   0  16  10    2.48    4.69
   0 -17   0   -0.04    1.78
   0 -17   0   -0.44    1.83
   0  17   0    0.36    2.38
   0  17   0   -0.47    2.78
   0 -17  -1    9.50    3.36
   0 -17  -1   11.40    3.58
   0 -17   1    9.57    3.42
   0 -17   1   13.80    3.66
   0  17  -1   15.40    4.03
   0  17  -1   17.88    4.20
   0  17   1   17.41    4.44
   0  17   1   18.32    4.63
   0 -17  -2   53.24    6.27
   0 -17  -2   52.68    6.06
   0 -17   2   50.74    5.86
   0 -17   2   57.66    6.07
   0  17  -2   65.93    6.67
   0  17  -2   65.54    6.68
   0  17   2   70.84    7.24
   0  17   2   70.55    7.10
   0 -17  -3   -0.46    2.09
   0 -17  -3    0.22    1.46
   0 -17   3    1.07    2.52
   0 -17   3    0.62    1.92
   0  17  -3    0.90    2.61
   0  17  -3    0.73    2.01
   0  17  -3    5.28    3.03
   0  17   3    0.96    2.85
   0  17   3    0.97    2.86
   0 -17  -4   -1.91    1.84
   0 -17  -4   -1.01    1.76
   0 -17   4    0.63    2.18
   0 -17   4   -0.46    1.95
   0  17  -4    0.62    2.52
   0  17  -4    0.17    2.98
   0  17  -4    0.43    2.80
   0  17   4    0.21    2.68
   0  17   4   -0.52    2.64
   0 -17  -5    2.79    2.92
   0 -17  -5    5.51    3.66
   0  17  -5    3.73    3.59
   0  17   5    8.00    4.73
   0 -17  -6    4.38    3.25
   0 -17  -6    1.39    2.79
   0  17  -6    0.03    3.39
   0  17   6   -1.03    3.42
   0  17   6    0.87    4.19
   0 -17  -7    0.53    2.69
   0 -17  -7    4.11    3.64
   0  17  -7    0.32    4.17
   0  17   7    8.00    4.82
   0  17   7    9.51    5.21
   0 -17  -8    9.86    4.81
   0 -17  -8    9.83    4.51
   0  17  -8    9.14    5.13
   0  17   8   14.12    5.77
   0  17   8   16.56    6.46
   0 -17  -9   -0.04    3.45
   0 -17  -9   -1.52    3.31
   0  17  -9   -1.83    4.31
   0  17   9   -2.47    3.75
   0 -17 -10    0.73    3.88
   0  17  10   -2.20    4.55
   0 -18   0   64.32    6.91
   0 -18   0   66.60    6.72
   0  18   0   84.60    7.83
   0  18   0   80.63    7.58
   0 -18  -1   47.66    6.25
   0 -18  -1   43.07    5.90
   0 -18   1   53.37    6.33
   0 -18   1   55.45    6.31
   0  18  -1   66.18    7.07
   0  18  -1   62.70    6.83
   0  18   1   66.69    7.12
   0  18   1   68.31    7.35
   0 -18  -2    6.32    3.22
   0 -18  -2    6.74    2.95
   0 -18   2    7.82    3.44
   0 -18   2    7.24    3.15
   0  18  -2   13.29    4.22
   0  18  -2    8.13    3.83
   0  18   2    5.65    3.28
   0  18   2   14.52    4.79
   0 -18  -3   36.12    5.84
   0 -18  -3   36.75    5.78
   0 -18   3   50.07    6.34
   0 -18   3   49.51    5.85
   0  18  -3   57.63    6.50
   0  18  -3   53.93    6.38
   0  18   3   58.34    6.99
   0  18   3   71.12    7.83
   0 -18  -4   37.62    6.22
   0 -18  -4   43.07    6.33
   0 -18   4   50.56    6.21
   0 -18   4   47.81    5.82
   0  18  -4   57.25    6.51
   0  18   4   59.52    7.22
   0  18   4   63.68    7.69
   0 -18  -5    3.28    2.81
   0 -18  -5    1.18    2.57
   0  18  -5    1.08    3.22
   0  18   5    3.05    4.23
   0 -18  -6    4.25    3.41
   0 -18  -6    3.52    3.26
   0  18  -6    1.52    3.54
   0  18   6    3.75    4.44
   0  18   6    5.63    4.92
   0 -18  -7   25.62    6.09
   0 -18  -7   23.25    5.81
   0  18  -7   12.16    5.47
   0  18   7   40.26    7.83
   0  18   7   52.20    8.84
   0 -18  -8    2.89    3.48
   0 -18  -8    1.53    3.53
   0  18  -8    0.64    4.75
   0  18   8    1.20    4.59
   0  18   8    6.22    6.11
   0 -18  -9    0.32    3.81
   0  18   9    1.23    5.03
   0 -19   0    0.28    2.28
   0 -19   0   -0.29    2.26
   0  19   0    1.50    3.18
   0  19   0    2.36    3.33
   0 -19  -1   21.23    4.91
   0 -19  -1   20.51    4.71
   0 -19   1   24.15    4.94
   0 -19   1   29.02    5.13
   0  19  -1   37.02    6.15
   0  19  -1   22.91    5.20
   0  19   1   35.28    6.37
   0  19   1   30.79    6.05
   0 -19  -2  165.77   11.21
   0 -19  -2  185.36   11.75
   0 -19   2  206.62   11.76
   0 -19   2  177.57   10.94
   0  19  -2  231.84   12.57
   0  19  -2  215.53   12.16
   0  19   2  246.90   13.52
   0  19   2  271.37   14.27
   0 -19  -3    4.74    3.36
   0 -19  -3    2.93    2.61
   0 -19   3    6.70    3.70
   0 -19   3    7.57    3.46
   0  19  -3    6.48    3.92
   0  19  -3    9.80    3.95
   0  19   3    9.79    4.20
   0  19   3    6.54    4.14
   0 -19  -4    4.53    3.45
   0 -19  -4    2.51    2.71
   0  19  -4    5.13    3.78
   0  19  -4    3.57    3.36
   0  19   4    7.32    4.45
   0  19   4    3.35    3.79
   0 -19  -5   45.35    7.06
   0 -19  -5   49.80    7.25
   0  19   5   76.65    8.70
   0  19   5   86.65    9.57
   0 -19  -6   45.09    7.25
   0 -19  -6   48.40    7.37
   0  19   6   86.65    9.43
   0  19   6   99.33   10.36
   0 -19  -7   13.68    5.17
   0 -19  -7   15.28    5.44
   0  19  -7    7.95    4.88
   0  19   7   21.57    6.75
   0  19   7   22.76    7.13
   0 -19  -8   11.03    5.36
   0  19  -8    5.68    5.35
   0  19   8    6.56    5.39
   0 -19  -9    4.14    4.36
   0  19   9   -1.12    4.44
   0 -20   0   58.02    7.34
   0 -20   0   55.12    7.08
   0  20   0   67.44    7.58
   0  20   0   68.78    7.99
   0 -20  -1   24.88    5.38
   0 -20  -1   23.72    5.11
   0 -20   1   25.67    5.32
   0 -20   1   26.54    5.16
   0  20  -1   28.82    6.10
   0  20  -1   27.27    5.77
   0  20   1   39.55    6.90
   0  20   1   35.60    6.57
   0 -20  -2    9.11    3.94
   0 -20  -2    6.64    3.63
   0 -20   2    8.91    4.09
   0 -20   2   13.32    4.16
   0  20  -2   13.70    4.70
   0  20  -2   10.92    4.53
   0  20   2    7.78    4.49
   0  20   2   11.31    4.99
   0 -20  -3   74.62    8.25
   0 -20  -3   68.12    7.74
   0 -20   3   90.62    8.61
   0 -20   3   80.72    7.92
   0  20  -3  104.63    9.17
   0  20   3  111.66   10.16
   0  20   3  112.78   10.15
   0 -20  -4   58.42    7.82
   0 -20  -4   69.78    8.09
   0  20  -4  101.72    8.97
   0  20   4   99.97    9.83
   0  20   4  105.89   10.29
   0 -20  -5   30.40    6.20
   0 -20  -5   35.14    6.65
   0  20   5   57.73    8.68
   0  20   5   55.80    8.57
   0 -20  -6    0.48    3.43
   0 -20  -6    7.78    4.15
   0  20   6    2.14    4.69
   0  20   6    4.22    4.96
   0 -20  -7   58.47    8.64
   0  20   7   86.59   10.11
   0 -20  -8   11.78    5.51
   0  20   8   16.45    6.41
   0 -21   0    0.66    2.81
   0 -21   0    1.77    2.72
   0  21   0    3.85    4.16
   0  21   0   -0.77    3.41
   0 -21  -1   42.71    6.80
   0 -21  -1   39.15    6.53
   0 -21   1   34.93    6.25
   0 -21   1   36.00    6.17
   0  21  -1   45.17    7.31
   0  21  -1   45.91    7.06
   0  21   1   46.02    7.39
   0  21   1   47.77    7.81
   0 -21  -2   73.46    8.36
   0 -21  -2   78.73    8.47
   0 -21   2   87.14    8.72
   0 -21   2   84.46    8.22
   0  21  -2   93.80    9.23
   0  21  -2   87.51    8.96
   0  21   2  113.97   10.22
   0  21   2  107.51   10.17
   0 -21  -3   15.54    5.02
   0 -21  -3   11.42    4.47
   0 -21   3   22.45    5.41
   0 -21   3   16.08    4.81
   0  21  -3   20.91    5.68
   0  21  -3   16.28    5.21
   0  21   3   19.83    6.34
   0  21   3   18.00    5.76
   0 -21  -4    1.85    3.24
   0 -21  -4   -0.27    2.49
   0  21   4    1.53    3.93
   0  21   4   -0.54    3.88
   0 -21  -5    5.07    3.75
   0 -21  -5    1.89    3.15
   0  21   5   10.18    5.27
   0  21   5   14.13    6.21
   0 -21  -6   55.20    8.39
   0  21   6   93.43   10.29
   0 -21  -7   10.03    5.22
   0  21   7   17.72    6.84
   0 -21  -8    0.89    4.15
   0  21   8    1.85    5.65
   0 -22   0   34.02    6.40
   0 -22   0   36.55    6.50
   0  22   0   42.95    7.52
   0  22   0   32.80    6.71
   0 -22  -1    5.24    3.86
   0 -22  -1   11.08    4.33
   0 -22   1   15.49    5.07
   0 -22   1   14.40    4.86
   0  22  -1   17.32    5.61
   0  22  -1   11.80    5.26
   0  22   1   19.20    6.12
   0  22   1   14.94    5.85
   0 -22  -2    1.20    3.33
   0 -22  -2    0.82    2.84
   0 -22   2    2.82    3.40
   0 -22   2   -0.06    2.95
   0  22  -2   -0.07    3.25
   0  22  -2   -0.44    3.80
   0  22   2   -3.58    3.66
   0  22   2   -0.61    4.04
   0 -22  -3   13.38    4.99
   0 -22  -3    9.57    5.18
   0 -22   3   21.57    5.58
   0  22  -3   16.46    5.57
   0  22  -3   11.57    5.13
   0  22   3   20.87    6.55
   0  22   3   21.54    7.02
   0 -22  -4    1.82    3.29
   0 -22  -4    1.98    3.73
   0  22   4    4.52    4.58
   0  22   4    6.17    5.39
   0 -22  -5   17.18    5.47
   0  22   5   30.75    7.45
   0 -22  -6    1.51    3.58
   0  22   6    0.32    4.62
   0 -22  -7   16.65    6.17
   0  22   7   11.58    6.25
   0 -23   0    2.63    3.73
   0 -23   0    3.54    3.67
   0  23   0    2.68    3.98
   0  23   0   -2.47    3.85
   0 -23  -1    4.29    4.08
   0 -23  -1    6.95    4.61
   0 -23   1    5.30    4.14
   0 -23   1    6.65    4.34
   0  23  -1    8.48    5.09
   0  23  -1    7.96    5.21
   0  23   1   10.03    5.23
   0  23   1    5.71    5.31
   0 -23  -2    9.55    4.70
   0 -23  -2   14.20    5.45
   0 -23   2    8.17    4.51
   0 -23   2   10.68    4.73
   0  23  -2   10.56    4.96
   0  23  -2    8.71    4.92
   0  23   2   20.66    6.77
   0  23   2   12.22    6.63
   0 -23  -3    0.17    2.84
   0 -23   3   -0.21    3.81
   0  23  -3    0.01    4.06
   0  23   3    0.13    4.32
   0  23   3    0.17    5.34
   0 -23  -4   11.61    5.19
   0  23   4   17.81    6.92
   0 -23  -5   -1.38    3.35
   0  23   5    3.95    5.31
   0 -23  -6    2.00    3.74
   0  23   6   -0.34    4.58
   0 -24   0   15.33    5.46
   0 -24   0   15.93    5.60
   0  24   0   15.72    6.02
   0  24   0   21.00    6.73
   0 -24  -1    1.74    3.87
   0 -24   1    1.13    3.90
   0 -24   1    5.52    4.79
   0  24  -1    0.34    4.34
   0  24  -1    3.68    5.61
   0  24   1    6.99    5.03
   0  24   1    2.24    5.96
   0 -24  -2    0.02    3.45
   0 -24   2   -1.01    3.94
   0 -24   2   -1.42    3.66
   0  24  -2   -1.37    4.02
   0  24  -2    0.51    4.55
   0  24   2    1.26    4.88
   0 -24  -3    5.66    4.47
   0  24  -3   12.66    5.75
   0  24   3    9.67    6.12
   0 -24  -4    4.13    4.21
   0  24   4    4.81    5.05
   0 -24  -5    0.65    3.87
   0  24   5    0.49    5.56
   0 -25   0   -1.90    3.25
   0  25   0    0.30    4.68
   0 -25  -1   -1.05    3.49
   0 -25   1    0.71    4.05
   0  25  -1    1.22    4.77
   0  25   1    2.23    4.91
   0 -25  -2   17.66    6.01
   0 -25   2   20.10    6.28
   0  25  -2   17.84    6.34
   0  25   2   19.43    6.99
   0 -25  -3    0.66    3.66
   0  25   3    8.25    5.98
   1   0 -13   -3.25    3.82
   1   0 -12   39.91    7.18
   1   0 -11   10.60    4.64
   1   0 -10  173.24   11.02
   1   0  -9   -1.15    2.59
  -1   0   8  209.22    8.76
  -1   0   8  322.53   10.32
   1   0  -8  224.30    8.75
   1   0  -8  257.25    9.43
   1   0  -8  104.86    7.58
  -1   0   7   26.33    3.66
  -1   0   7   41.04    3.89
   1   0  -7   28.96    3.59
   1   0  -7   15.23    3.40
  -1   0   6    3.92    1.54
   1   0  -6    2.25    1.53
   1   0  -6    1.05    1.64
  -1   0   5   24.54    2.42
   1   0  -5    7.42    2.11
  -1   0   4  376.07    8.31
  -1   0   4  492.87    8.03
   1   0  -4  169.18    6.07
  -1   0   3   55.46    3.01
  -1   0   3   65.75    2.46
   1   0  -3   23.19    2.12
  -1   0   2 3172.72   20.55
  -1   0   2 3430.96   26.90
   1   0  -2 2652.80   18.12
  -1   0   1   24.35    1.41
  -1   0   1   17.46    0.81
   1   0  -1   25.51    1.25
  -1   0   0  629.54    6.66
  -1   0   0  571.71    6.45
  -1   0  -1   24.43    0.99
  -1   0  -1   16.82    1.40
  -1   0  -1   24.88    1.69
  -1   0  -2  679.83    7.05
  -1   0  -2  779.42   11.03
  -1   0  -2 1257.60   13.69
  -1   0  -3    1.12    0.54
  -1   0  -3    1.04    1.00
  -1   0  -3    1.11    0.90
  -1   0  -4  650.04    8.67
  -1   0  -4  540.37   12.13
  -1   0  -4  954.78   15.09
  -1   0  -5    9.57    1.51
  -1   0  -5    4.50    1.96
  -1   0  -5   12.04    2.47
  -1   0  -6  527.41   13.37
  -1   0  -6  399.59    8.55
  -1   0  -6  306.90   11.19
  -1   0  -6  544.53   13.67
  -1   0  -7    1.44    1.98
  -1   0  -7    0.42    1.91
  -1   0  -8    0.04    2.01
  -1   0  -8   -0.62    2.06
   1   0   8    0.19    2.63
  -1   0  -9    0.51    2.16
  -1   0  -9    0.67    2.66
   1   0   9   -2.67    2.42
  -1   0 -10  505.11   17.09
  -1   0 -10  277.63   14.35
  -1   0 -11    2.11    3.66
  -1   0 -12    3.21    4.53
   1  -1 -13    2.41    4.48
   1   1 -13   -1.92    4.40
   1  -1 -12   13.52    5.20
   1   1 -12    8.29    4.62
   1  -1 -11   88.40    8.84
   1   1 -11  101.67    9.39
   1  -1 -10   12.14    4.37
   1   1 -10    6.58    3.59
   1  -1  -9    3.92    3.08
   1   1  -9   -0.89    2.57
  -1  -1   8   18.41    3.45
  -1   1   8   12.23    3.24
  -1   1   8   20.94    3.56
   1  -1  -8   18.88    3.40
   1  -1  -8    9.79    3.22
   1   1  -8   22.43    3.38
   1   1  -8    6.33    3.13
  -1  -1   7  115.59    5.76
  -1   1   7   84.52    5.72
  -1   1   7  125.60    6.27
   1  -1  -7   97.88    5.86
   1  -1  -7   41.70    4.67
   1   1  -7  118.87    6.11
   1   1  -7   39.65    4.82
  -1  -1   6   27.39    3.07
  -1  -1   6   43.33    3.50
  -1   1   6   40.91    3.57
   1  -1  -6   36.92    3.55
   1  -1  -6   16.47    3.01
   1   1  -6   13.27    2.82
  -1  -1   5   87.18    4.55
  -1  -1   5  117.13    4.45
  -1   1   5  103.39    4.60
   1  -1  -5   38.57    3.51
   1   1  -5   37.14    3.56
  -1  -1   4  201.42    6.02
  -1  -1   4  255.72    5.46
  -1   1   4  262.41    6.29
   1  -1  -4   89.81    4.46
   1   1  -4  110.47    5.14
  -1  -1   3  277.87    6.32
  -1   1   3  293.87    5.71
   1  -1  -3  120.82    4.27
   1   1  -3  165.92    5.39
  -1  -1   2  586.73    8.16
  -1  -1   2  725.23    9.38
  -1   1   2  611.25    8.63
  -1   1   2  626.93    7.26
   1  -1  -2  340.75    5.55
   1   1  -2  619.56    8.63
  -1  -1   1  423.30    6.06
  -1   1   1  457.71    6.32
  -1   1   1  330.08    4.69
   1  -1  -1  508.91    5.91
   1   1  -1  515.68    6.60
  -1  -1   0   86.79    2.39
  -1  -1   0  131.16    3.12
  -1   1   0  214.28    3.42
  -1   1   0  142.99    2.68
  -1   1   0  182.55    3.67
  -1  -1  -1 1029.19    9.36
  -1  -1  -1  950.47   10.35
  -1  -1  -1 1345.12   12.48
  -1   1  -1  793.19    9.07
  -1   1  -1 1246.41   11.88
  -1  -1  -2  699.33    7.92
  -1  -1  -2  895.97   11.88
  -1  -1  -2 1377.50   14.65
  -1   1  -2  781.02   10.90
  -1   1  -2  765.29   10.99
  -1   1  -2 1293.90   13.84
  -1  -1  -3   14.35    1.48
  -1  -1  -3   19.21    2.27
  -1  -1  -3   23.44    2.35
  -1   1  -3   32.97    1.49
  -1   1  -3   16.77    2.27
  -1   1  -3   36.27    2.79
  -1  -1  -4   76.37    3.38
  -1  -1  -4   71.55    4.61
  -1  -1  -4  123.36    5.67
  -1   1  -4   93.58    3.06
  -1   1  -4   64.90    4.49
  -1   1  -4  116.01    5.35
  -1  -1  -5   93.42    5.48
  -1  -1  -5   67.42    3.54
  -1  -1  -5   61.71    4.75
  -1  -1  -5  103.21    5.73
  -1   1  -5   82.86    3.34
  -1   1  -5   48.88    4.37
  -1   1  -5  101.38    5.55
  -1  -1  -6   42.16    4.23
  -1  -1  -6   24.23    2.68
  -1  -1  -6   22.81    3.62
  -1   1  -6   34.89    3.92
  -1   1  -6   21.01    2.48
  -1   1  -6   18.24    3.56
  -1   1  -6   38.29    4.11
  -1  -1  -7  441.95   13.34
  -1  -1  -7  261.03   11.20
  -1   1  -7  459.72   13.35
  -1   1  -7  253.54   11.23
  -1   1  -7  449.17   13.30
   1   1   7  658.19   16.22
  -1  -1  -8    6.42    2.72
  -1  -1  -8    4.75    2.93
  -1   1  -8    5.40    2.71
  -1   1  -8    1.76    2.83
   1   1   8   11.64    4.02
  -1  -1  -9  359.05   13.80
  -1  -1  -9  209.43   11.82
  -1   1  -9  354.78   13.53
  -1   1  -9  211.56   11.87
   1   1   9  521.14   16.69
  -1  -1 -10    0.64    2.41
  -1  -1 -10   -0.09    3.15
  -1   1 -10   -0.55    3.00
  -1  -1 -11   25.32    6.05
  -1   1 -11   24.38    6.17
  -1  -1 -12    4.12    4.59
  -1   1 -12   -1.85    4.30
   1  -2 -13    4.59    5.19
   1   2 -13    1.21    5.17
   1  -2 -12   29.79    6.59
   1   2 -12   27.61    6.61
   1  -2 -11   18.56    5.17
   1   2 -11   16.01    5.28
   1  -2 -10   14.15    4.35
   1   2 -10   12.61    4.61
   1  -2  -9    1.97    2.75
   1   2  -9    4.72    3.44
  -1   2   8   13.67    3.20
  -1   2   8   16.28    3.49
   1  -2  -8    8.83    2.91
   1  -2  -8   11.40    2.97
   1  -2  -8    7.04    3.11
   1   2  -8    6.41    3.11
  -1  -2   7   60.50    4.60
  -1  -2   7   84.99    4.89
  -1   2   7  101.03    6.01
  -1   2   7  105.62    6.05
   1  -2  -7   62.89    5.05
   1  -2  -7   37.06    4.43
   1   2  -7   25.68    4.18
  -1  -2   6  306.81    8.75
  -1   2   6  402.54   10.30
   1  -2  -6  146.66    7.01
   1   2  -6  129.13    7.12
  -1  -2   5   75.55    4.17
  -1   2   5   95.33    4.71
   1  -2  -5   49.08    3.65
   1  -2  -5   37.34    3.44
   1   2  -5   36.40    3.75
   1   2  -5   66.16    3.43
  -1  -2   4  315.73    7.47
  -1   2   4  346.18    7.76
   1  -2  -4  339.69    8.39
   1  -2  -4  149.75    5.53
   1   2  -4  172.33    6.48
   1   2  -4  296.36    5.81
  -1  -2   3    3.79    1.04
  -1   2   3    4.72    1.09
   1  -2  -3    4.90    1.24
   1  -2  -3    1.65    1.00
   1   2  -3    1.87    1.15
   1   2  -3    2.18    0.61
  -1  -2   2   66.64    2.90
   1  -2  -2   79.28    3.38
   1  -2  -2   35.92    1.84
   1   2  -2   87.85    3.56
  -1  -2   1   52.32    2.29
  -1   2   1   51.23    2.14
   1  -2  -1   60.21    2.48
   1   2  -1   69.28    2.66
   1   2  -1   70.95    1.74
  -1  -2   0  363.95    5.77
  -1  -2   0  301.88    5.33
  -1   2   0  243.61    3.62
  -1   2   0  375.09    5.96
   1  -2   0  413.37    5.45
   1   2   0  539.00    6.71
  -1  -2  -1    0.02    0.22
  -1  -2  -1   72.46    2.95
  -1   2  -1   22.19    1.58
   1  -2   1   68.43    1.63
   1   2   1  131.76    3.99
  -1  -2  -2  564.67    8.05
  -1  -2  -2  809.99   11.45
  -1   2  -2  505.20    9.04
  -1   2  -2 1060.81   12.72
   1   2   2 1536.33   16.00
  -1  -2  -3  212.89    5.40
  -1  -2  -3  248.70    7.29
  -1   2  -3  423.75    5.15
  -1   2  -3  172.84    6.23
  -1   2  -3  354.11    8.21
  -1  -2  -4    1.72    1.00
  -1  -2  -4    2.47    1.56
  -1   2  -4   10.39    1.17
  -1   2  -4    2.32    1.56
  -1   2  -4    6.33    1.72
   1   2   4    9.82    2.27
  -1  -2  -5  109.36    6.01
  -1  -2  -5   70.78    3.85
  -1  -2  -5   72.04    5.16
  -1   2  -5   99.70    3.46
  -1   2  -5   46.65    4.34
  -1   2  -5  103.18    5.57
   1   2   5  148.76    7.01
  -1  -2  -6  237.10    9.28
  -1  -2  -6  158.86    6.19
  -1  -2  -6  141.60    7.65
  -1   2  -6  240.37    9.00
  -1   2  -6  131.63    7.75
  -1   2  -6  249.02    9.18
   1   2   6  362.07   11.52
  -1  -2  -7    7.27    2.64
  -1  -2  -7    5.98    2.86
  -1   2  -7    6.46    2.63
  -1   2  -7    3.77    2.62
  -1   2  -7    7.51    2.85
   1   2   7    8.13    3.24
  -1  -2  -8   25.29    4.30
  -1  -2  -8   14.68    4.04
  -1   2  -8   29.44    4.39
  -1   2  -8   11.08    3.71
  -1   2  -8   24.09    4.12
   1   2   8   41.74    5.76
  -1  -2  -9    1.45    2.36
  -1  -2  -9    1.19    2.67
  -1   2  -9   -3.06    1.91
  -1   2  -9    1.19    3.09
   1   2   9   -0.48    3.48
  -1  -2 -10  156.71   10.14
  -1  -2 -10   99.44    8.85
  -1   2 -10   79.62    8.41
  -1  -2 -11   -0.29    3.05
  -1   2 -11    1.17    3.68
  -1  -2 -12    1.64    4.14
  -1   2 -12    1.83    4.25
   1  -3 -13    6.04    5.48
   1  -3 -12   16.16    5.66
   1   3 -12   15.35    5.49
   1  -3 -11    2.77    3.65
   1   3 -11    4.57    3.82
   1  -3 -10    6.27    3.56
   1   3 -10    2.77    3.24
   1  -3  -9   -0.38    2.39
   1  -3  -9   -0.15    2.29
   1   3  -9    0.30    3.07
  -1  -3   8   12.89    2.93
  -1   3   8   22.60    3.83
   1  -3  -8   10.39    3.25
   1  -3  -8    9.17    3.20
   1  -3  -8    4.81    2.76
   1   3  -8   10.98    3.75
  -1  -3   7    8.91    2.32
  -1   3   7    9.60    2.86
  -1   3   7    7.19    2.53
   1  -3  -7    1.30    1.59
   1  -3  -7   -1.23    0.83
   1  -3  -7    4.39    2.33
   1   3  -7    0.21    2.10
   1   3  -7    5.26    1.84
  -1  -3   6  149.74    6.21
  -1   3   6  202.24    7.71
   1  -3  -6  120.19    6.21
   1  -3  -6   91.36    5.65
   1   3  -6   72.72    5.64
   1   3  -6  151.19    5.65
  -1  -3   5  159.77    5.94
  -1   3   5  151.04    6.09
   1  -3  -5  165.85    6.76
   1  -3  -5   91.79    4.99
   1   3  -5   81.09    5.25
   1   3  -5  157.51    5.02
  -1  -3   4  273.88    7.06
   1  -3  -4  281.20    8.02
   1  -3  -4  158.66    5.56
   1   3  -4  182.28    6.88
   1   3  -4  256.86    5.41
  -1  -3   3  257.82    6.32
   1  -3  -3  271.91    7.19
   1  -3  -3  159.31    4.62
   1   3  -3  265.31    7.38
   1   3  -3  266.00    4.59
  -1  -3   2   31.87    2.20
  -1   3   2   27.19    2.03
   1  -3  -2   36.43    2.54
   1  -3  -2   24.55    1.54
   1   3  -2   30.34    2.31
  -1  -3   1   13.54    1.38
  -1   3   1   17.13    1.50
   1  -3  -1   15.06    1.60
   1   3  -1   16.00    1.14
  -1  -3   0   49.93    2.45
  -1  -3   0   47.53    2.39
  -1   3   0   29.30    1.34
  -1   3   0   50.21    2.46
   1  -3   0   47.53    2.12
   1   3   0   77.91    2.84
  -1  -3  -1   46.84    2.51
  -1  -3  -1   46.61    2.55
  -1   3  -1    3.66    0.84
  -1   3  -1   55.87    2.78
   1  -3   1   40.39    1.66
   1   3   1   81.87    3.42
  -1  -3  -2    0.34    0.36
  -1  -3  -2  478.70    9.00
  -1   3  -2  277.32    6.87
  -1   3  -2  588.90    9.74
   1  -3   2  630.46    6.69
   1   3   2  853.33   12.44
  -1  -3  -3  187.84    5.62
  -1  -3  -3  255.79    7.50
  -1   3  -3  151.63    6.02
  -1   3  -3  323.00    7.97
   1  -3   3  379.78    4.91
   1   3   3  475.28   10.35
  -1  -3  -4    8.01    1.55
  -1  -3  -4    9.83    2.13
  -1   3  -4    6.29    1.98
  -1   3  -4   11.83    2.13
   1  -3   4   11.12    1.23
   1   3   4   21.80    2.99
  -1  -3  -5   21.95    3.18
  -1  -3  -5    8.55    1.85
  -1  -3  -5   10.79    2.50
  -1   3  -5   30.99    2.03
  -1   3  -5   11.53    2.81
  -1   3  -5   22.68    3.01
   1   3   5   31.09    3.81
  -1  -3  -6    7.69    2.40
  -1  -3  -6    7.49    1.85
  -1  -3  -6    7.08    2.31
  -1   3  -6    8.93    2.39
  -1   3  -6    5.33    2.53
  -1   3  -6    8.08    2.39
   1   3   6   14.08    3.19
  -1  -3  -7   12.91    3.10
  -1  -3  -7    4.92    1.88
  -1  -3  -7    7.92    2.86
  -1   3  -7   15.62    3.27
  -1   3  -7    8.06    3.12
  -1   3  -7   13.37    3.13
   1   3   7   18.97    3.95
  -1  -3  -8    4.69    2.68
  -1  -3  -8    2.55    2.57
  -1   3  -8    5.92    2.71
  -1   3  -8    1.29    2.59
  -1   3  -8    5.55    2.89
   1   3   8    9.91    3.91
  -1  -3  -9    5.30    3.02
  -1  -3  -9    1.76    2.41
  -1   3  -9    1.03    2.68
  -1   3  -9    0.80    3.01
  -1   3  -9    0.94    2.62
   1   3   9    5.56    4.13
  -1  -3 -10    0.27    2.66
  -1  -3 -10   -0.72    2.39
  -1   3 -10   -2.71    2.34
   1   3  10    1.26    4.39
  -1  -3 -11    6.69    4.07
  -1   3 -11    4.78    4.18
  -1  -3 -12   -0.64    3.55
  -1   3 -12    2.78    4.68
   1  -4 -13    4.55    4.95
   1  -4 -12    0.41    3.84
   1   4 -12   -1.49    3.82
   1  -4 -11   27.97    5.93
   1   4 -11   16.40    5.69
   1  -4 -10   21.88    5.02
   1   4 -10   10.59    4.38
  -1   4   9   49.57    6.16
   1  -4  -9   33.77    4.85
   1  -4  -9   37.19    4.98
   1  -4  -9   23.69    4.73
   1   4  -9   16.61    4.79
  -1  -4   8   87.55    5.77
  -1   4   8  105.30    6.98
  -1   4   8  114.06    7.20
   1  -4  -8   53.99    5.31
   1   4  -8   31.21    5.04
  -1  -4   7   23.26    3.14
  -1   4   7    9.89    2.53
  -1   4   7    9.38    2.51
   1  -4  -7   22.84    3.67
   1  -4  -7   22.72    3.61
   1  -4  -7   16.48    3.30
   1   4  -7    9.71    3.16
   1   4  -7   22.91    2.91
  -1  -4   6    3.15    1.52
  -1   4   6    0.90    1.26
  -1   4   6   -1.28    0.85
   1  -4  -6    0.67    2.02
   1  -4  -6   -1.24    1.44
   1  -4  -6   -0.77    1.25
   1   4  -6    2.95    2.18
   1   4  -6    1.29    1.34
  -1  -4   5    1.37    1.27
  -1   4   5    1.23    1.19
   1  -4  -5   -1.15    1.06
   1  -4  -5    0.54    1.34
   1   4  -5    0.67    1.61
   1   4  -5    2.09    1.16
  -1  -4   4   24.15    2.44
  -1   4   4   35.64    3.10
   1  -4  -4   20.40    2.58
   1  -4  -4   17.13    2.17
   1   4  -4   22.81    2.81
   1   4  -4   30.23    2.12
  -1  -4   3  981.09   12.89
  -1   4   3 1114.11   14.61
   1  -4  -3  949.70   14.17
   1  -4  -3  703.75    9.52
   1   4  -3 1030.83   15.03
   1   4  -3  765.45    8.71
  -1  -4   2  102.91    4.00
  -1   4   2  119.13    4.46
   1  -4  -2  106.08    4.44
   1  -4  -2   88.86    2.59
   1   4  -2  151.32    5.19
   1   4  -2  114.12    3.12
  -1  -4   1   37.83    2.38
  -1   4   1   36.17    2.39
   1  -4  -1   30.38    2.26
   1  -4  -1   32.63    1.16
   1   4  -1   47.21    2.21
  -1  -4   0  741.46   10.42
  -1  -4   0  696.11    9.70
  -1   4   0  721.15    7.54
  -1   4   0  821.51   10.94
   1  -4   0  706.22    9.17
   1   4   0 1197.81   12.48
  -1  -4  -1  281.29    6.61
  -1  -4  -1  368.03    7.37
  -1   4  -1  236.75    5.39
   1  -4   1  282.71    5.14
   1   4   1  630.63   10.10
  -1  -4  -2    7.67    1.42
  -1  -4  -2   13.82    1.90
  -1   4  -2    7.47    1.61
  -1   4  -2   10.51    1.69
   1  -4   2   13.67    1.13
   1   4   2   22.59    2.42
  -1  -4  -3    1.66    0.80
  -1  -4  -3   26.95    2.65
  -1   4  -3   15.60    2.33
  -1   4  -3   34.28    2.79
   1  -4   3   36.03    1.73
   1   4   3   52.24    3.77
  -1  -4  -4   61.11    3.84
  -1  -4  -4   75.42    4.69
  -1   4  -4   39.10    3.74
  -1   4  -4   95.26    4.96
   1  -4   4  109.26    3.13
   1   4   4  154.00    6.90
  -1  -4  -5    6.63    2.10
  -1  -4  -5    4.53    1.52
  -1  -4  -5    6.86    2.24
  -1   4  -5    1.74    1.91
  -1   4  -5    4.79    1.99
   1  -4   5    5.98    1.19
   1   4   5    6.16    2.53
  -1  -4  -6  151.43    7.82
  -1  -4  -6   79.46    4.97
  -1  -4  -6   89.83    6.26
  -1   4  -6  143.11    7.08
  -1   4  -6   55.39    5.42
  -1   4  -6  133.77    6.87
   1   4   6  207.29    9.26
  -1  -4  -7    3.10    2.28
  -1  -4  -7    1.79    1.49
  -1  -4  -7   -1.08    1.58
  -1   4  -7   -0.39    1.83
  -1   4  -7    1.25    2.85
  -1   4  -7    0.64    1.99
   1   4   7    1.46    2.80
  -1  -4  -8    1.58    2.08
  -1  -4  -8    0.59    2.19
  -1   4  -8    2.24    2.00
  -1   4  -8    1.89    3.14
  -1   4  -8    2.44    2.52
   1   4   8    1.27    3.08
  -1  -4  -9    4.17    3.14
  -1   4  -9    1.52    3.10
  -1   4  -9    7.56    3.49
   1   4   9    9.56    4.47
  -1  -4 -10    2.84    3.05
  -1   4 -10    1.38    3.17
   1   4  10    3.36    3.89
   1   4  10    1.44    4.28
  -1  -4 -11    9.60    4.25
  -1   4 -11    3.49    4.00
  -1  -4 -12    0.69    4.15
  -1   4 -12    1.98    4.63
   1  -5 -13    4.00    4.79
   1  -5 -12   12.78    5.30
   1   5 -12   10.53    5.65
   1  -5 -11   22.64    5.38
   1   5 -11   15.03    5.47
   1  -5 -10    6.71    3.51
   1   5 -10   -1.05    2.79
  -1   5   9    1.70    2.18
  -1   5   9    3.64    2.71
   1  -5  -9   -0.24    1.68
   1  -5  -9    0.48    1.48
   1  -5  -9    4.54    2.90
   1   5  -9    0.74    2.70
   1  -5  -8  135.91    8.08
   1  -5  -8  149.49    8.51
   1  -5  -8  110.17    7.42
   1   5  -8   71.39    6.77
  -1  -5   7  185.15    7.40
  -1   5   7  192.55    8.75
  -1   5   7  209.10    9.17
   1  -5  -7  157.69    8.14
   1  -5  -7  163.43    8.28
   1  -5  -7  107.57    6.64
   1   5  -7   72.85    6.36
   1   5  -7  179.35    6.78
  -1  -5   6    1.61    1.48
  -1   5   6    5.06    2.53
  -1   5   6    5.94    2.40
   1  -5  -6    0.53    1.87
   1  -5  -6    1.71    1.66
   1  -5  -6    1.07    1.62
   1   5  -6    3.15    2.14
   1   5  -6    2.74    1.43
  -1  -5   5    4.57    1.63
  -1   5   5    1.68    1.60
   1  -5  -5    4.89    2.21
   1  -5  -5    3.14    1.76
   1  -5  -5    2.37    1.51
   1   5  -5    1.27    1.64
   1   5  -5    2.63    1.18
  -1  -5   4  141.86    5.49
  -1   5   4  171.25    6.66
   1  -5  -4  123.70    5.90
   1  -5  -4   93.62    4.25
   1   5  -4  116.72    5.92
   1   5  -4  123.46    4.14
  -1  -5   3  207.38    6.27
  -1   5   3  240.14    7.30
   1  -5  -3  172.54    6.45
   1  -5  -3  161.63    4.56
   1   5  -3  253.47    7.85
   1   5  -3  214.80    5.05
  -1  -5   2  114.73    4.50
  -1   5   2  102.13    4.49
   1  -5  -2   97.74    4.51
   1  -5  -2   95.82    2.79
   1   5  -2  132.84    5.16
   1   5  -2   99.83    3.40
  -1  -5   1  148.45    5.03
  -1   5   1  145.85    5.14
   1  -5  -1  124.81    4.72
   1  -5  -1  132.00    2.81
   1   5  -1  174.53    4.70
  -1  -5   0  341.60    7.72
  -1  -5   0  343.37    7.31
  -1   5   0  427.17    6.09
  -1   5   0  387.64    8.17
   1  -5   0  317.47    6.79
   1   5   0  570.31    9.35
  -1  -5  -1  639.02   10.91
  -1  -5  -1  844.66   11.83
  -1   5  -1  651.41    9.35
  -1   5  -1  965.87   13.18
   1  -5   1  663.20    9.06
   1   5   1 1448.09   16.49
  -1  -5  -2  174.89    5.98
  -1  -5  -2  263.59    7.14
  -1   5  -2  164.92    5.65
  -1   5  -2  323.22    7.99
   1  -5   2  271.89    5.37
   1   5   2  475.22   10.32
  -1  -5  -3   51.66    3.55
  -1  -5  -3   73.03    4.26
  -1   5  -3   42.78    3.57
  -1   5  -3   75.54    4.26
   1  -5   3   95.47    3.15
   1   5   3  146.46    6.35
  -1  -5  -4   16.13    2.25
  -1  -5  -4   41.16    3.68
  -1   5  -4   19.48    2.99
  -1   5  -4   42.22    3.53
   1  -5   4   56.24    2.58
   1   5   4   67.57    5.07
  -1  -5  -5  467.73   11.50
  -1  -5  -5  812.21   16.62
  -1   5  -5 1051.50   17.59
  -1   5  -5  456.19   13.10
  -1   5  -5 1042.29   17.51
   1  -5   5 1158.57   11.86
   1   5   5 1616.97   24.07
  -1  -5  -6   47.37    4.46
  -1  -5  -6   50.41    4.31
  -1  -5  -6   61.70    5.22
  -1   5  -6   84.15    5.70
  -1   5  -6   40.26    4.95
  -1   5  -6   87.73    5.75
   1   5   6  121.45    7.41
  -1  -5  -7  100.83    6.35
  -1  -5  -7  104.32    6.28
  -1  -5  -7  112.30    7.55
  -1   5  -7  164.36    8.26
  -1   5  -7   66.93    6.69
  -1   5  -7  151.82    7.93
   1   5   7  244.39   11.12
  -1  -5  -8   35.46    5.29
  -1   5  -8   49.40    5.19
  -1   5  -8   23.70    5.14
  -1   5  -8   48.30    5.40
   1   5   8   84.14    7.48
   1   5   8   71.33    7.17
  -1  -5  -9   32.77    5.50
  -1   5  -9   25.44    5.71
   1   5   9   67.40    7.06
   1   5   9   74.38    7.79
  -1  -5 -10    0.23    2.67
  -1   5 -10    4.36    4.25
   1   5  10   -4.86    3.41
   1   5  10   -1.15    4.06
  -1  -5 -11   27.95    6.07
  -1   5 -11   14.46    5.16
  -1  -5 -12    2.46    4.44
   1  -6 -12   45.27    7.47
   1   6 -12   23.50    6.73
   1  -6 -11    6.56    3.88
   1   6 -11    2.23    4.09
   1  -6 -10   15.70    4.40
   1   6 -10    3.42    3.47
  -1   6   9   62.78    6.55
  -1   6   9   57.34    6.48
   1  -6  -9   39.47    5.53
   1  -6  -9   48.91    5.96
   1  -6  -9   40.31    5.46
   1   6  -9   14.66    4.54
  -1   6   8  196.17    9.90
  -1   6   8  200.58   10.06
   1  -6  -8  102.04    7.43
   1  -6  -8  130.02    8.27
   1  -6  -8   95.73    6.91
  -1  -6   7   31.40    3.75
  -1   6   7   39.12    4.90
  -1   6   7   33.48    4.67
   1  -6  -7   27.01    4.11
   1  -6  -7   25.52    4.13
   1  -6  -7   25.73    3.71
   1   6  -7   12.66    3.66
   1   6  -7   26.27    3.16
  -1  -6   6  390.06   10.27
  -1   6   6  466.52   13.07
  -1   6   6  484.66   13.30
   1  -6  -6  330.85   11.24
   1  -6  -6  300.05   10.68
   1  -6  -6  265.92    9.11
   1   6  -6  204.30    9.63
   1   6  -6  359.33    8.78
  -1  -6   5   19.82    2.57
  -1   6   5   18.05    3.18
  -1   6   5   23.03    3.33
   1  -6  -5   17.87    3.22
   1  -6  -5   14.40    2.72
   1  -6  -5   14.60    2.37
   1   6  -5    8.27    2.57
   1   6  -5   14.39    2.01
  -1  -6   4 1216.90   16.49
  -1   6   4 1390.79   19.79
   1  -6  -4 1048.31   17.64
   1  -6  -4 1095.51   18.00
   1  -6  -4  943.51   13.24
   1   6  -4 1106.36   18.42
   1   6  -4  846.37   11.53
  -1  -6   3   63.09    3.77
  -1   6   3   69.59    4.35
   1  -6  -3   50.74    3.81
   1  -6  -3   54.78    2.82
   1   6  -3   72.79    4.52
   1   6  -3   29.80    2.20
  -1  -6   2   38.40    2.90
  -1   6   2   28.99    2.71
   1  -6  -2   30.99    2.83
   1  -6  -2   34.32    1.85
   1   6  -2   36.14    3.00
   1   6  -2   26.18    2.11
  -1  -6   1   97.94    4.45
  -1   6   1   93.16    4.46
   1  -6  -1   81.56    4.15
   1  -6  -1   86.38    2.64
   1   6  -1  148.32    5.33
   1   6  -1  119.11    4.35
  -1  -6   0  183.11    6.13
  -1  -6   0  217.11    6.20
  -1   6   0  290.55    5.49
  -1   6   0  241.53    7.00
   1  -6   0  180.33    5.65
   1   6   0  334.19    7.80
  -1  -6  -1   65.40    3.83
  -1  -6  -1   94.96    4.23
  -1   6  -1   89.60    3.72
  -1   6  -1  114.95    4.93
   1  -6   1   70.16    3.35
   1   6   1  164.79    5.97
  -1  -6  -2  797.62   13.69
  -1  -6  -2 1235.37   16.07
  -1   6  -2  467.94    9.73
  -1   6  -2 1443.61   17.83
   1  -6   2 1219.73   13.09
   1   6   2 2057.23   22.69
  -1  -6  -3  176.92    6.83
  -1  -6  -3  281.48    8.37
  -1   6  -3  162.99    6.61
  -1   6  -3  325.49    8.92
   1  -6   3  347.75    6.65
   1   6   3  540.01   12.55
  -1  -6  -4  288.92    9.10
  -1  -6  -4  450.80   11.52
  -1   6  -4  238.23    8.90
  -1   6  -4  541.08   12.12
   1  -6   4  581.26    8.63
   1   6   4  804.99   16.49
   1   6   4  831.58   16.73
  -1  -6  -5  150.61    7.07
  -1  -6  -5  152.38    7.04
  -1  -6  -5  278.16    9.88
  -1   6  -5  335.75   10.24
  -1   6  -5  130.71    7.48
  -1   6  -5  342.83   10.33
   1  -6   5  404.64    7.40
   1   6   5  506.30   13.97
   1   6   5  514.82   14.11
  -1  -6  -6  755.75   17.57
  -1   6  -6  981.73   18.45
  -1   6  -6  391.93   13.53
  -1   6  -6 1004.50   18.67
   1   6   6 1466.10   25.18
   1   6   6 1547.35   25.94
  -1  -6  -7   12.98    3.03
  -1  -6  -7   15.21    2.99
  -1  -6  -7   21.14    4.07
  -1   6  -7   26.16    4.06
  -1   6  -7   11.98    4.05
  -1   6  -7   23.02    3.84
   1   6   7   36.56    5.17
   1   6   7   36.37    5.41
  -1  -6  -8   11.99    3.65
  -1   6  -8   16.23    3.72
  -1   6  -8    2.91    3.37
  -1   6  -8   17.65    3.87
   1   6   8   23.08    5.05
   1   6   8   20.63    5.16
  -1  -6  -9    5.93    3.47
  -1   6  -9    5.25    4.08
   1   6   9   12.07    4.59
   1   6   9   18.43    5.52
  -1  -6 -10   52.39    7.08
  -1   6 -10   24.53    6.27
   1   6  10  106.24    9.32
   1   6  10  100.10    9.72
  -1  -6 -11   -0.62    3.03
  -1   6 -11   -0.83    4.08
   1   6  11    0.81    4.64
  -1  -6 -12   -1.02    4.17
   1   7 -12    1.67    4.79
   1  -7 -11   37.19    6.31
   1   7 -11   25.05    6.13
   1  -7 -10   26.09    5.09
   1   7 -10   17.05    5.07
  -1   7   9   28.80    5.52
  -1   7   9   31.11    5.72
   1  -7  -9   16.75    4.22
   1  -7  -9   20.98    4.44
   1  -7  -9   16.63    4.05
   1   7  -9    8.67    4.23
  -1   7   8  105.42    7.93
  -1   7   8  101.24    7.87
   1  -7  -8   70.10    6.67
   1  -7  -8   60.76    6.27
   1  -7  -8   54.67    5.46
   1   7  -8   26.38    5.17
  -1  -7   7  459.68   11.95
  -1   7   7  590.38   16.16
  -1   7   7  613.28   16.40
   1  -7  -7  375.94   13.05
   1  -7  -7  368.13   12.95
   1  -7  -7  335.17   11.23
   1   7  -7  217.59   10.84
  -1  -7   6  105.40    5.69
  -1   7   6  126.80    7.19
  -1   7   6  120.90    7.20
   1  -7  -6   89.81    6.38
   1  -7  -6   82.27    6.07
   1  -7  -6   75.52    5.02
   1   7  -6   55.46    5.53
   1   7  -6   92.70    4.86
  -1  -7   5   75.48    4.66
  -1   7   5   96.08    6.03
  -1   7   5   96.42    6.09
   1  -7  -5   57.25    4.88
   1  -7  -5   56.69    4.92
   1  -7  -5   56.08    3.92
   1   7  -5   59.12    5.20
   1   7  -5   76.20    4.08
  -1  -7   4  321.74    8.97
  -1   7   4  371.98   10.81
  -1   7   4  362.40   10.69
   1  -7  -4  254.95    9.19
   1  -7  -4  252.95    9.18
   1  -7  -4  262.23    7.10
   1   7  -4  299.13   10.01
   1   7  -4  216.89    6.31
  -1  -7   3 2903.62   26.19
  -1   7   3 3084.17   29.54
   1  -7  -3 2339.61   26.02
   1  -7  -3 2453.51   19.29
   1   7  -3 3448.08   31.18
   1   7  -3 2532.25   21.17
  -1  -7   2  162.79    6.10
  -1   7   2  168.92    6.68
   1  -7  -2  135.26    5.97
   1  -7  -2  152.71    4.09
   1   7  -2  224.08    7.37
   1   7  -2  175.30    5.53
  -1  -7   1   49.46    3.43
  -1   7   1   51.94    3.67
   1  -7  -1   43.05    3.31
   1   7  -1   72.25    4.05
   1   7  -1   62.06    3.51
  -1  -7   0   21.68    2.39
  -1  -7   0   26.11    2.48
  -1   7   0   36.21    2.24
  -1   7   0   30.62    2.81
   1  -7   0   19.90    2.17
   1   7   0   46.45    3.31
  -1  -7  -1  215.11    7.33
  -1  -7  -1  298.84    7.81
  -1   7  -1  295.78    7.03
  -1   7  -1  321.14    8.65
   1  -7   1  234.65    6.58
   1   7   1  470.44   10.66
  -1  -7  -2  140.70    6.18
  -1  -7  -2  221.97    7.09
  -1   7  -2  170.42    6.51
   1  -7   2  205.06    5.87
   1   7   2  385.18   10.36
  -1  -7  -3  451.76   11.44
  -1  -7  -3  692.91   13.39
  -1   7  -3  428.63   10.92
  -1   7  -3  768.29   14.22
   1  -7   3  801.17   11.24
   1   7   3 1179.58   19.11
   1   7   3 1216.83   19.58
  -1  -7  -4  354.21   10.66
  -1  -7  -4  336.08   10.33
  -1  -7  -4  538.50   12.80
  -1   7  -4  303.30   10.22
  -1   7  -4  656.22   13.80
   1  -7   4  682.57   10.27
   1   7   4  941.35   18.44
   1   7   4 1018.61   19.18
  -1  -7  -5  665.69   15.21
  -1  -7  -5  637.70   14.87
  -1  -7  -5  990.41   18.76
  -1   7  -5 1285.32   20.37
  -1   7  -5  551.69   14.94
  -1   7  -5 1275.51   20.24
   1  -7   5 1396.66   14.85
   1   7   5 1904.92   27.78
   1   7   5 1933.10   27.97
  -1  -7  -6   16.86    3.15
  -1  -7  -6   20.04    3.17
  -1  -7  -6   25.34    3.97
  -1   7  -6   27.95    3.87
  -1   7  -6   10.26    3.48
  -1   7  -6   29.32    4.06
   1   7   6   48.37    5.34
   1   7   6   50.03    5.90
  -1  -7  -7   10.97    2.74
  -1  -7  -7   60.77    5.87
  -1   7  -7   78.24    6.05
  -1   7  -7   35.85    5.46
  -1   7  -7   78.12    6.13
   1   7   7  113.69    8.11
   1   7   7  117.80    8.64
  -1  -7  -8    5.29    2.61
  -1  -7  -8    7.80    3.30
  -1   7  -8   11.70    3.42
  -1   7  -8    5.27    3.60
  -1   7  -8    6.48    3.24
   1   7   8   11.43    4.18
   1   7   8   14.90    4.88
  -1  -7  -9   17.23    4.58
  -1   7  -9    9.52    4.70
   1   7   9   22.02    5.53
   1   7   9   30.51    6.34
  -1  -7 -10   -1.83    2.69
  -1   7 -10    2.45    3.88
   1   7  10   -1.69    3.62
   1   7  10   -1.76    4.57
  -1  -7 -11   52.42    7.78
  -1   7 -11   35.61    7.44
   1   7  11  116.17   10.90
   1   7  11  123.47   11.56
  -1  -7 -12    4.77    5.27
   1   8 -12    8.61    5.81
   1   8 -11    5.40    4.23
  -1   8  10   10.06    4.73
  -1   8  10   11.30    5.15
   1  -8 -10    8.55    4.09
   1  -8 -10    8.16    3.80
   1  -8 -10   10.72    3.98
   1   8 -10    3.71    3.88
  -1   8   9   35.92    5.88
  -1   8   9   46.66    6.61
   1  -8  -9   20.53    4.65
   1  -8  -9   21.75    4.72
   1  -8  -9   19.38    4.22
   1   8  -9   13.31    4.84
  -1   8   8  348.84   13.63
  -1   8   8  367.63   14.13
   1  -8  -8  200.14   10.56
   1  -8  -8  216.48   10.94
   1  -8  -8  188.36    9.36
   1   8  -8  115.09    9.12
  -1  -8   7   67.09    5.26
  -1   8   7   71.43    6.33
  -1   8   7   70.14    6.27
   1  -8  -7   58.68    5.70
   1  -8  -7   56.42    5.85
   1  -8  -7   57.94    4.99
   1   8  -7   28.53    5.23
  -1  -8   6  408.50   11.26
  -1  -8   6  389.89   10.89
  -1   8   6  471.53   14.08
  -1   8   6  472.18   14.24
   1  -8  -6  307.48   11.65
   1  -8  -6  303.76   11.53
   1  -8  -6  295.68    9.64
   1   8  -6  238.72   10.87
   1   8  -6  350.14    9.28
  -1  -8   5   77.06    4.90
  -1   8   5   97.85    6.31
  -1   8   5   97.44    6.36
   1  -8  -5   63.27    5.38
   1  -8  -5   50.35    4.69
   1  -8  -5   67.20    4.28
   1   8  -5   60.72    5.33
   1   8  -5   65.71    4.06
  -1  -8   4  387.60   10.23
  -1   8   4  482.39   12.84
  -1   8   4  462.29   12.63
   1  -8  -4  322.75   10.73
   1  -8  -4  326.09   10.77
   1  -8  -4  330.35    8.11
   1   8  -4  412.24   12.10
   1   8  -4  385.16    8.92
  -1  -8   3   95.22    5.09
  -1   8   3   90.94    5.54
  -1   8   3   79.19    5.16
   1  -8  -3   73.91    5.16
   1  -8  -3   79.12    5.23
   1  -8  -3   90.08    3.80
   1   8  -3  102.70    5.74
   1   8  -3   77.88    4.12
  -1  -8   2  589.83   12.28
  -1   8   2  650.14   13.68
   1  -8  -2  488.47   11.87
   1  -8  -2  569.35    8.48
   1   8  -2  845.75   14.91
   1   8  -2  626.32   11.27
  -1  -8   1   38.34    3.29
  -1   8   1   65.81    2.94
  -1   8   1   46.05    3.75
   1  -8  -1   39.43    3.44
   1   8  -1   67.93    4.20
   1   8  -1   54.02    3.60
  -1  -8   0    3.32    1.42
  -1  -8   0    1.86    1.13
  -1   8   0   10.37    1.51
  -1   8   0    7.37    1.87
   1  -8   0    2.26    1.20
   1   8   0   11.01    2.09
  -1  -8  -1  238.47    8.20
  -1  -8  -1  338.52    8.74
  -1   8  -1  377.41    8.38
  -1   8  -1  382.96   10.07
   1  -8   1  267.15    7.62
   1   8   1  536.79   12.09
  -1  -8  -2  816.57   15.66
  -1  -8  -2  782.55   15.30
  -1  -8  -2 1213.85   17.16
  -1   8  -2 1359.90   19.17
   1  -8   2 1089.30   14.73
   1   8   2 1895.44   24.04
   1   8   2 1986.80   24.58
  -1  -8  -3   61.77    4.75
  -1  -8  -3   59.07    4.50
  -1  -8  -3   99.85    5.37
  -1   8  -3   56.24    4.32
  -1   8  -3   95.46    5.47
   1  -8   3  103.94    4.50
   1   8   3  179.36    7.63
   1   8   3  163.65    7.73
  -1  -8  -4    8.70    2.39
  -1  -8  -4    8.56    2.13
  -1  -8  -4   16.17    2.83
  -1   8  -4   20.42    3.19
  -1   8  -4   12.77    2.93
  -1   8  -4   27.64    3.45
   1  -8   4   18.64    2.23
   1   8   4   30.98    4.23
   1   8   4   35.22    4.21
  -1  -8  -5   17.16    3.09
  -1  -8  -5   15.82    2.93
  -1  -8  -5   24.84    3.67
  -1   8  -5   33.78    3.83
  -1   8  -5   14.90    3.58
  -1   8  -5   33.02    3.92
   1  -8   5   34.29    2.94
   1   8   5   42.75    5.13
   1   8   5   46.79    5.20
  -1  -8  -6  207.82    9.42
  -1  -8  -6  196.71    9.15
  -1  -8  -6  299.12   11.32
  -1   8  -6  365.07   11.81
  -1   8  -6  136.88    8.75
  -1   8  -6  372.89   11.94
   1   8   6  563.43   16.57
   1   8   6  574.62   16.82
  -1  -8  -7   13.13    3.31
  -1  -8  -7   12.55    3.09
  -1  -8  -7   18.25    3.85
  -1   8  -7   15.97    3.53
  -1   8  -7    9.45    3.81
  -1   8  -7   20.95    3.95
   1   8   7   32.21    5.20
   1   8   7   34.82    5.77
  -1  -8  -8    2.04    2.11
  -1  -8  -8    0.73    1.59
  -1  -8  -8   10.43    3.75
  -1   8  -8    5.92    3.74
  -1   8  -8   10.96    3.52
   1   8   8   22.11    5.29
   1   8   8   15.71    4.90
  -1  -8  -9    1.67    2.78
  -1   8  -9    1.91    3.50
   1   8   9    5.94    4.44
   1   8   9    0.54    4.29
  -1  -8 -10   55.06    7.35
  -1   8 -10   33.19    7.07
   1   8  10   93.45    9.57
   1   8  10   98.84   10.14
  -1  -8 -11    4.33    3.96
  -1   8 -11    3.34    5.13
   1   8  11    7.93    5.94
   1   8  11    4.10    6.27
  -1  -8 -12    1.51    4.66
   1   9 -11    1.31    4.31
  -1   9  10   39.86    6.67
  -1   9  10   45.12    7.31
   1  -9 -10   21.83    5.11
   1  -9 -10   20.02    5.07
   1   9 -10   10.91    5.18
  -1   9   9   17.71    4.96
  -1   9   9   22.34    5.65
   1  -9  -9    7.04    3.51
   1  -9  -9    7.80    3.77
   1   9  -9    7.04    4.12
  -1   9   8   10.72    3.77
  -1   9   8   13.96    4.49
   1  -9  -8   13.72    3.90
   1  -9  -8   14.36    4.00
   1  -9  -8   11.60    3.37
   1   9  -8    6.35    3.92
  -1  -9   7  445.98   12.45
  -1   9   7  538.93   16.38
  -1   9   7  551.80   16.77
   1  -9  -7  330.55   13.07
   1  -9  -7  349.80   13.46
   1  -9  -7  319.05   11.06
   1   9  -7  227.71   11.51
  -1  -9   6   45.25    4.63
  -1  -9   6   40.48    4.04
  -1   9   6   48.85    5.07
  -1   9   6   50.90    5.52
   1  -9  -6   37.26    4.87
   1  -9  -6   31.86    4.56
   1  -9  -6   37.60    3.78
   1   9  -6   23.28    4.34
   1   9  -6   42.75    3.77
  -1  -9   5   16.39    2.92
  -1  -9   5   17.18    2.77
  -1   9   5   30.62    4.22
  -1   9   5   26.57    4.19
   1  -9  -5   18.54    3.47
   1  -9  -5    9.22    2.75
   1  -9  -5   15.44    2.41
   1   9  -5   18.39    3.73
   1   9  -5   24.14    2.95
  -1  -9   4   -0.19    1.23
  -1   9   4   -1.69    1.29
  -1   9   4    0.07    1.50
   1  -9  -4    1.71    1.60
   1  -9  -4   -1.85    1.00
   1  -9  -4    0.08    0.97
   1   9  -4   -1.00    1.74
   1   9  -4    1.08    1.09
  -1  -9   3  177.18    7.22
  -1   9   3  201.51    8.43
  -1   9   3  185.31    8.09
   1  -9  -3  124.10    6.75
   1  -9  -3  130.05    6.86
   1  -9  -3  160.69    5.25
   1   9  -3  222.02    8.62
   1   9  -3  181.55    6.55
  -1  -9   2  191.72    7.47
  -1   9   2  251.72    8.65
  -1   9   2  236.05    8.76
   1  -9  -2  171.64    7.58
   1  -9  -2  162.96    7.27
   1  -9  -2  211.18    5.53
   1   9  -2  289.47    9.20
   1   9  -2  226.80    7.37
  -1  -9   1  242.43    8.42
  -1   9   1  296.86    9.57
  -1   9   1  393.62    7.45
  -1   9   1  271.55    9.12
   1  -9  -1  217.34    8.06
   1  -9  -1  213.52    7.93
   1   9  -1  406.83   10.29
   1   9  -1  320.35    8.94
  -1  -9   0   15.65    2.57
  -1  -9   0   13.42    2.38
  -1  -9   0   20.29    2.59
  -1   9   0   25.53    3.16
  -1   9   0   26.63    2.36
  -1   9   0   17.09    2.68
   1  -9   0   16.67    2.45
   1   9   0   24.43    3.06
  -1  -9  -1  454.90   11.98
  -1  -9  -1  426.46   11.57
  -1  -9  -1  628.68   12.45
  -1   9  -1  678.32   14.17
  -1   9  -1  684.61   11.84
  -1   9  -1  669.21   14.01
   1  -9   1  483.30   10.93
   1   9   1  947.94   16.97
   1   9   1  927.37   16.69
  -1  -9  -2  458.06   12.38
  -1  -9  -2  458.98   12.37
  -1  -9  -2  680.38   13.35
  -1   9  -2  777.43   15.32
  -1   9  -2  513.80   11.39
  -1   9  -2  735.04   14.83
   1  -9   2  589.97   11.67
   1   9   2 1089.20   19.09
   1   9   2 1075.59   18.96
  -1  -9  -3   29.25    3.58
  -1  -9  -3   31.61    3.54
  -1  -9  -3   39.21    3.63
  -1   9  -3   51.66    4.27
  -1   9  -3   30.13    3.60
  -1   9  -3   49.62    4.22
   1  -9   3   48.29    3.45
   1   9   3   89.97    5.84
   1   9   3   78.82    5.84
  -1  -9  -4   55.82    4.88
  -1  -9  -4   54.80    4.72
  -1  -9  -4   87.75    5.51
  -1   9  -4  106.71    6.17
  -1   9  -4   47.90    4.62
  -1   9  -4  113.79    6.38
   1  -9   4  109.36    4.96
   1   9   4  163.83    8.44
   1   9   4  167.20    8.58
  -1  -9  -5    5.49    2.19
  -1  -9  -5    5.13    2.12
  -1  -9  -5    8.12    2.46
  -1   9  -5    4.75    2.20
  -1   9  -5    3.80    2.77
  -1   9  -5    8.41    2.55
   1   9   5    9.85    3.33
   1   9   5    8.43    3.44
  -1  -9  -6   76.17    6.15
  -1  -9  -6   73.28    5.95
  -1  -9  -6  107.06    7.07
  -1   9  -6  137.27    7.69
  -1   9  -6   46.55    5.69
  -1   9  -6  134.58    7.54
   1   9   6  201.15   10.43
   1   9   6  217.85   10.96
  -1  -9  -7   16.36    3.60
  -1  -9  -7   13.91    3.24
  -1  -9  -7   28.61    4.59
  -1   9  -7   32.88    4.60
  -1   9  -7   18.22    4.92
  -1   9  -7   29.94    4.45
   1   9   7   42.84    6.04
   1   9   7   52.58    6.56
  -1  -9  -8    4.22    2.64
  -1  -9  -8    6.34    2.91
  -1  -9  -8    7.46    3.40
  -1   9  -8    3.14    3.62
   1   9   8   17.06    5.03
   1   9   8   15.47    5.25
  -1  -9  -9   29.15    5.49
  -1   9  -9   12.33    5.06
   1   9   9   56.33    7.63
   1   9   9   48.84    7.69
  -1  -9 -10    2.85    3.45
  -1   9 -10   -0.77    3.52
   1   9  10    0.61    4.62
   1   9  10    2.49    5.62
  -1  -9 -11    4.37    4.24
  -1   9 -11    2.64    5.06
   1   9  11   11.81    6.38
   1   9  11   14.59    6.72
   1  10 -11    4.06    4.93
  -1  10  10   42.53    6.99
  -1  10  10   32.65    6.90
   1 -10 -10   17.57    4.90
   1 -10 -10   17.37    4.86
   1  10 -10    8.47    4.64
  -1  10   9    2.10    3.28
  -1  10   9    1.57    3.61
   1 -10  -9   -0.33    2.59
   1 -10  -9    0.52    2.78
   1  10  -9    2.03    3.60
  -1  10   8   30.85    5.36
  -1  10   8   36.22    5.90
   1 -10  -8   14.53    4.18
   1 -10  -8   18.08    4.50
   1  10  -8   11.37    4.48
  -1  10   7   59.61    6.03
  -1  10   7   67.98    6.89
   1 -10  -7   37.68    5.30
   1 -10  -7   51.05    5.95
   1 -10  -7   47.40    4.68
   1  10  -7   29.13    5.39
  -1 -10   6   28.80    3.86
  -1 -10   6   31.28    3.86
  -1  10   6   31.59    4.81
  -1  10   6   33.44    5.09
   1 -10  -6   21.35    4.09
   1 -10  -6   23.93    4.16
   1 -10  -6   23.28    3.25
   1  10  -6   20.55    4.48
  -1 -10   5   19.31    3.34
  -1 -10   5   18.40    3.02
  -1  10   5   16.32    3.46
  -1  10   5   17.19    3.82
   1 -10  -5    9.90    2.95
   1 -10  -5   11.38    3.10
   1 -10  -5   16.37    2.54
   1  10  -5   13.38    3.40
   1  10  -5   14.31    2.64
  -1 -10   4   67.27    5.04
  -1 -10   4   67.98    4.91
  -1  10   4   80.67    6.06
  -1  10   4   76.11    6.00
   1 -10  -4   50.28    4.83
   1 -10  -4   57.51    5.16
   1 -10  -4   59.61    3.80
   1  10  -4   78.19    5.82
   1  10  -4   61.63    4.23
  -1 -10   3    5.21    2.04
  -1 -10   3    6.55    2.04
  -1  10   3    8.41    2.48
  -1  10   3    7.41    2.60
   1 -10  -3    6.02    2.28
   1 -10  -3    5.16    2.07
   1 -10  -3    9.38    1.69
   1  10  -3    6.71    2.34
   1  10  -3   10.18    2.19
  -1 -10   2  113.59    6.22
  -1 -10   2  120.32    6.27
  -1  10   2  139.98    7.01
  -1  10   2  128.03    6.84
   1 -10  -2   98.39    6.12
   1 -10  -2  100.30    6.10
   1 -10  -2  117.68    4.46
   1  10  -2  174.32    7.47
   1  10  -2  141.15    6.26
  -1 -10   1   40.05    3.84
  -1 -10   1   34.90    3.54
  -1  10   1   46.40    4.23
  -1  10   1   68.29    3.51
  -1  10   1   42.85    4.03
   1 -10  -1   33.53    3.72
   1 -10  -1   35.96    3.64
   1  10  -1   63.44    4.49
   1  10  -1   49.31    4.00
  -1 -10   0    6.77    2.05
  -1 -10   0    5.00    1.79
  -1 -10   0    7.25    1.92
  -1  10   0   11.23    2.58
  -1  10   0   14.77    2.07
  -1  10   0   12.26    2.65
   1 -10   0    6.01    1.98
   1 -10   0    6.30    1.85
   1  10   0   15.32    2.89
   1  10   0   17.40    2.84
  -1 -10  -1  258.06    9.54
  -1 -10  -1  248.62    9.33
  -1 -10  -1  360.74    9.87
  -1  10  -1  378.62   11.17
  -1  10  -1  412.21    9.68
  -1  10  -1  368.03   10.96
   1 -10   1  281.07    8.91
   1  10   1  519.97   13.24
   1  10   1  506.70   13.03
  -1 -10  -2   13.79    2.71
  -1 -10  -2   12.74    2.71
  -1 -10  -2   19.96    2.83
  -1  10  -2   19.68    3.20
  -1  10  -2   15.72    2.67
  -1  10  -2   19.52    3.06
   1 -10   2   21.76    2.70
   1  10   2   29.57    4.05
   1  10   2   27.62    3.84
  -1 -10  -3    1.95    1.61
  -1 -10  -3   -1.22    1.08
  -1 -10  -3    0.84    1.26
  -1  10  -3    1.44    1.53
  -1  10  -3   14.06    2.95
  -1  10  -3    2.23    1.70
   1 -10   3    1.80    1.24
   1  10   3    9.70    2.84
   1  10   3   13.51    3.27
  -1 -10  -4   22.41    3.55
  -1 -10  -4   23.58    3.61
  -1 -10  -4   33.10    3.68
  -1  10  -4   45.23    4.34
  -1  10  -4   21.03    3.66
  -1  10  -4   35.75    4.02
   1 -10   4   40.06    3.36
   1  10   4   86.24    5.90
   1  10   4   79.50    6.43
  -1 -10  -5   45.97    4.89
  -1 -10  -5   46.59    4.91
  -1 -10  -5   70.53    5.51
  -1  10  -5   96.25    6.42
  -1  10  -5   36.20    5.05
  -1  10  -5   84.46    5.98
   1  10   5  134.15    8.53
   1  10   5  150.29    9.01
  -1 -10  -6    1.88    2.01
  -1 -10  -6    1.03    1.86
  -1 -10  -6    2.25    2.13
  -1  10  -6    3.51    2.23
  -1  10  -6    2.19    3.12
  -1  10  -6    2.72    2.11
   1  10   6    5.18    3.36
   1  10   6    5.65    3.49
  -1 -10  -7   18.70    3.89
  -1 -10  -7   13.85    3.58
  -1 -10  -7   24.12    4.40
  -1  10  -7   28.03    4.49
  -1  10  -7   10.46    4.08
  -1  10  -7   26.27    4.38
   1  10   7   44.67    6.57
   1  10   7   50.44    6.92
  -1 -10  -8    3.55    2.62
  -1 -10  -8    0.40    2.07
  -1 -10  -8    3.60    2.69
  -1  10  -8   -1.33    3.12
   1  10   8    4.49    4.19
   1  10   8   -2.16    3.92
  -1 -10  -9    2.23    2.79
  -1  10  -9    3.06    4.31
   1  10   9    7.80    4.86
   1  10   9    9.46    5.38
  -1 -10 -10   -1.74    2.71
  -1  10 -10   -3.06    3.26
   1  10  10    1.27    4.85
   1  10  10    1.28    5.67
  -1  10 -11    3.16    4.87
   1  10  11   -1.47    5.52
   1  10  11    0.18    6.23
   1  10  12    8.59    7.18
  -1  11  11   17.53    6.14
   1  11 -11    4.93    5.19
  -1  11  10   -5.03    3.25
  -1  11  10   -2.08    4.45
   1 -11 -10    0.38    3.21
   1 -11 -10   -1.20    3.06
   1  11 -10    2.11    4.15
  -1  11   9   88.98    8.64
  -1  11   9   95.18    8.90
   1 -11  -9   59.02    7.19
   1 -11  -9   57.57    7.16
   1  11  -9   27.61    6.14
  -1  11   8   38.80    5.93
  -1  11   8   46.33    6.71
   1 -11  -8   25.61    5.04
   1 -11  -8   24.89    4.88
   1  11  -8   15.01    4.93
  -1  11   7   29.02    5.16
  -1  11   7   26.78    5.22
   1 -11  -7   13.79    3.95
   1 -11  -7   14.39    3.89
   1  11  -7   13.27    4.48
  -1 -11   6   49.08    4.94
  -1 -11   6   43.91    4.54
  -1  11   6   57.63    5.80
  -1  11   6   55.81    6.04
   1 -11  -6   35.32    5.07
   1 -11  -6   39.71    5.15
   1  11  -6   32.87    5.18
  -1 -11   5   22.99    3.69
  -1 -11   5   15.54    2.97
  -1  11   5   18.69    3.77
  -1  11   5   20.69    4.07
   1 -11  -5   14.60    3.54
   1 -11  -5   15.46    3.60
   1 -11  -5   15.87    2.70
   1  11  -5   15.94    3.00
   1  11  -5   17.17    3.86
   1  11  -5   15.22    2.75
  -1 -11   4   12.70    2.81
  -1 -11   4   10.44    2.46
  -1  11   4   14.80    3.53
  -1  11   4   14.46    3.56
   1 -11  -4    6.03    2.58
   1 -11  -4    5.88    2.58
   1 -11  -4   12.77    2.17
   1  11  -4   15.47    2.82
   1  11  -4   17.04    3.61
   1  11  -4   12.47    2.54
  -1 -11   3  145.66    7.31
  -1 -11   3  137.67    7.02
  -1  11   3  154.59    8.04
  -1  11   3  157.84    8.28
   1 -11  -3   99.52    6.63
   1 -11  -3  106.63    6.83
   1 -11  -3  139.13    5.38
   1  11  -3  160.08    7.12
   1  11  -3  174.52    8.20
   1  11  -3  143.14    6.60
  -1 -11   2   24.71    3.47
  -1 -11   2   26.98    3.49
  -1  11   2   39.89    3.96
  -1  11   2   29.47    3.95
   1 -11  -2   16.80    3.15
   1 -11  -2   17.59    3.11
   1 -11  -2   25.18    2.45
   1  11  -2   29.87    3.56
   1  11  -2   36.88    3.86
   1  11  -2   26.40    3.24
  -1 -11   1   77.87    5.48
  -1 -11   1   83.40    5.56
  -1  11   1  110.50    6.57
  -1  11   1  155.69    5.50
  -1  11   1  103.61    6.33
   1 -11  -1   77.97    5.53
   1 -11  -1   70.77    5.18
   1  11  -1  116.57    6.37
   1  11  -1  135.63    6.63
   1  11  -1  115.33    6.23
  -1 -11   0    3.39    1.88
  -1 -11   0    2.69    1.59
  -1 -11   0    5.53    1.91
  -1  11   0    4.20    2.00
  -1  11   0    4.67    1.56
  -1  11   0    2.20    1.89
   1 -11   0    2.20    1.44
   1 -11   0    4.27    1.78
   1  11   0    5.08    1.97
   1  11   0    6.48    2.43
  -1 -11  -1   59.36    4.93
  -1 -11  -1   61.36    5.06
  -1 -11  -1   75.89    4.93
  -1  11  -1   87.03    5.89
  -1  11  -1   92.72    4.96
  -1  11  -1   93.84    6.04
   1 -11   1   66.77    4.96
   1 -11   1   64.10    4.67
   1  11   1  120.87    7.00
   1  11   1  119.49    6.80
  -1 -11  -2   36.58    4.16
  -1 -11  -2   28.14    3.88
  -1 -11  -2   46.20    4.00
  -1  11  -2   55.40    4.79
  -1  11  -2   47.75    4.12
  -1  11  -2   49.79    4.60
   1 -11   2   46.78    4.20
   1 -11   2   43.28    3.85
   1  11   2   70.98    5.65
   1  11   2   76.33    5.82
  -1 -11  -3    1.90    1.57
  -1 -11  -3    4.25    2.11
  -1 -11  -3    4.03    1.77
  -1  11  -3    8.57    2.62
  -1  11  -3    2.48    1.83
  -1  11  -3    6.02    2.32
   1 -11   3    6.88    1.98
   1  11   3    8.64    3.02
   1  11   3   11.34    3.22
  -1 -11  -4  181.67    9.22
  -1 -11  -4  174.41    9.00
  -1 -11  -4  277.69   10.11
  -1  11  -4  329.45   11.41
  -1  11  -4  167.04    8.48
  -1  11  -4  328.76   11.38
   1 -11   4  316.64    9.35
   1  11   4  479.91   14.75
   1  11   4  484.36   15.33
  -1 -11  -5    3.57    2.20
  -1 -11  -5    3.13    2.16
  -1 -11  -5    6.80    2.55
  -1  11  -5    4.29    2.50
  -1  11  -5   -1.30    2.43
  -1  11  -5    2.60    2.12
   1  11   5    5.46    3.18
   1  11   5    7.60    3.47
  -1 -11  -6   19.63    3.82
  -1 -11  -6   26.78    4.34
  -1 -11  -6   44.12    4.96
  -1  11  -6   50.55    5.31
  -1  11  -6   24.12    4.73
  -1  11  -6   51.27    5.44
   1  11   6   88.83    7.80
   1  11   6   75.65    7.36
  -1 -11  -7    4.70    2.67
  -1 -11  -7    1.26    2.04
  -1 -11  -7    6.07    2.88
  -1  11  -7    6.30    3.12
  -1  11  -7    3.21    3.52
  -1  11  -7    7.32    3.21
   1  11   7    9.36    4.51
   1  11   7   10.91    5.02
  -1 -11  -8    8.37    3.35
  -1 -11  -8    5.61    2.94
  -1 -11  -8    8.18    3.55
  -1  11  -8    3.81    4.07
   1  11   8    9.41    4.62
   1  11   8   10.60    5.33
  -1 -11  -9   -0.74    2.54
  -1  11  -9    2.03    4.14
   1  11   9    4.74    4.75
   1  11   9    3.23    5.39
  -1  11 -10   14.90    6.06
   1  11  10   35.60    8.15
   1  11  10   32.81    8.20
   1  11  11   22.98    7.78
   1  11  11   22.62    8.40
   1  11  12   13.13    7.50
  -1  12  11    2.33    4.46
   1  12 -11    2.70    5.06
  -1  12  10    1.62    4.42
  -1  12  10    9.19    5.67
   1 -12 -10    1.29    3.62
   1 -12 -10    4.84    3.76
   1  12 -10    0.65    4.04
  -1  12   9    6.50    4.96
  -1  12   9   15.26    5.60
   1 -12  -9    7.47    4.08
   1 -12  -9    7.84    3.79
   1  12  -9    3.70    4.18
  -1  12   8  282.76   13.71
  -1  12   8  293.17   14.20
   1 -12  -8  170.54   10.93
   1 -12  -8  179.10   11.23
   1  12  -8  112.80    9.69
  -1  12   7   88.25    7.83
  -1  12   7   78.75    7.91
   1 -12  -7   52.70    6.32
   1 -12  -7   49.09    6.03
   1  12  -7   41.09    6.42
  -1 -12   6   18.80    3.70
  -1 -12   6   14.28    3.10
  -1  12   6   14.77    4.05
  -1  12   6   22.23    4.71
   1 -12  -6   15.59    3.92
   1 -12  -6   10.48    3.49
   1  12  -6    8.84    3.74
  -1 -12   5   67.37    5.54
  -1 -12   5   65.05    5.52
  -1  12   5   78.52    6.63
  -1  12   5   86.30    7.09
   1 -12  -5   50.62    5.62
   1 -12  -5   52.87    5.82
   1  12  -5   52.15    5.66
   1  12  -5   60.75    4.89
  -1 -12   4  195.54    8.88
  -1 -12   4  197.04    8.81
  -1  12   4  217.45   10.33
  -1  12   4  217.82   10.45
   1 -12  -4  154.11    8.90
   1 -12  -4  146.02    8.67
   1 -12  -4  195.97    7.09
   1  12  -4  197.76    8.29
   1  12  -4  214.96    9.96
   1  12  -4  166.55    7.52
  -1 -12   3    4.98    2.14
  -1 -12   3    7.30    2.33
  -1  12   3   14.38    3.47
   1 -12  -3    3.98    2.27
   1 -12  -3    4.59    2.11
   1 -12  -3    6.52    1.72
   1  12  -3    9.93    2.66
   1  12  -3   14.07    3.20
   1  12  -3    9.70    2.46
  -1 -12   2  202.78    8.96
  -1 -12   2  207.99    9.00
  -1  12   2  240.71   10.22
  -1  12   2  238.56   10.19
   1 -12  -2  164.79    8.44
   1 -12  -2  160.61    8.31
   1 -12  -2  231.92    6.97
   1  12  -2  251.73    9.35
   1  12  -2  325.09   10.97
  -1 -12   1   54.87    4.97
  -1 -12   1   49.77    4.58
  -1  12   1   71.01    5.63
  -1  12   1   92.58    4.56
  -1  12   1   61.59    5.31
   1 -12  -1   52.61    4.83
   1 -12  -1   50.02    4.62
   1  12  -1   76.79    5.45
   1  12  -1   75.85    5.37
   1  12  -1   78.35    5.52
  -1 -12   0  195.04    8.99
  -1 -12   0  193.17    8.91
  -1 -12   0  263.48    9.25
  -1  12   0  261.19   10.27
  -1  12   0  321.04    8.70
  -1  12   0  238.49    9.80
   1 -12   0  218.85    9.18
   1 -12   0  207.12    8.84
   1  12   0  320.25   11.05
   1  12   0  306.16   10.79
  -1 -12  -1   90.01    6.34
  -1 -12  -1   96.21    6.50
  -1 -12  -1  131.13    6.60
  -1  12  -1  126.05    7.24
  -1  12  -1  141.15    6.35
  -1  12  -1  128.73    7.23
   1 -12   1   97.44    6.07
   1 -12   1   98.45    5.98
   1  12   1  168.78    8.52
   1  12   1  172.17    8.45
  -1 -12  -2  151.87    8.27
  -1 -12  -2  137.28    7.89
  -1 -12  -2  220.31    8.60
  -1  12  -2  221.83    9.52
  -1  12  -2  186.26    7.79
  -1  12  -2  214.38    9.33
   1 -12   2  184.85    8.03
   1 -12   2  181.79    7.87
   1  12   2  296.62   11.47
   1  12   2  291.56   11.36
  -1 -12  -3  154.86    8.61
  -1 -12  -3  146.33    8.41
  -1 -12  -3  227.29    9.04
  -1  12  -3  228.92    9.75
  -1  12  -3  232.34    9.76
   1 -12   3  225.04    8.72
   1 -12   3  219.90    8.48
   1  12   3  334.08   12.73
   1  12   3  327.59   12.54
  -1 -12  -4   10.83    2.92
  -1 -12  -4   12.74    3.19
  -1 -12  -4   18.17    3.25
  -1  12  -4   27.95    4.21
  -1  12  -4   13.61    3.61
  -1  12  -4   22.22    3.83
   1 -12   4   19.59    2.90
   1  12   4   40.09    4.82
   1  12   4   35.43    5.44
  -1 -12  -5   62.89    6.00
  -1 -12  -5   62.90    6.10
  -1 -12  -5  104.05    6.84
  -1  12  -5  110.21    7.29
  -1  12  -5   39.19    5.53
  -1  12  -5  116.72    7.51
   1  12   5  172.54   10.25
   1  12   5  170.20   10.16
  -1 -12  -6   28.41    4.62
  -1 -12  -6   27.46    4.59
  -1 -12  -6   42.37    5.08
  -1  12  -6   47.98    5.35
  -1  12  -6   26.29    5.27
  -1  12  -6   32.36    4.75
   1  12   6   69.74    7.42
   1  12   6   86.78    8.39
  -1 -12  -7   32.53    5.16
  -1 -12  -7   31.03    5.11
  -1 -12  -7   38.74    5.42
  -1  12  -7   19.67    5.21
   1  12   7   72.93    7.94
   1  12   7   75.68    8.51
  -1 -12  -8    0.51    2.50
  -1 -12  -8    1.35    2.38
  -1 -12  -8    2.81    2.72
  -1  12  -8   -1.33    3.17
   1  12   8    3.65    4.39
   1  12   8    4.05    4.76
  -1 -12  -9   27.22    5.44
  -1  12  -9   14.68    5.44
   1  12   9   63.39    8.84
   1  12   9   68.01    9.52
  -1  12 -10   18.47    6.21
   1  12  10  102.13   10.71
   1  12  10  102.39   10.95
   1  12  11    5.10    6.54
   1  12  11    1.26    7.09
  -1  13  11   31.53    6.96
  -1  13  11   35.63    8.33
   1 -13 -11   13.32    5.43
  -1  13  10   13.80    5.31
  -1  13  10    8.58    5.73
   1 -13 -10    2.83    4.03
   1 -13 -10    8.23    4.57
   1  13 -10    4.43    4.63
  -1  13   9   29.17    6.92
   1 -13  -9   21.20    5.49
   1 -13  -9   16.28    5.11
   1  13  -9    9.96    5.24
  -1  13   8   24.32    5.23
  -1  13   8   34.67    6.42
   1 -13  -8   21.07    4.98
   1 -13  -8   18.52    4.82
   1  13  -8   13.27    5.10
  -1  13   7  234.88   12.51
  -1  13   7  240.85   12.90
   1 -13  -7  127.97    9.37
   1 -13  -7  133.93    9.66
   1  13  -7  106.92    9.10
  -1 -13   6    7.97    2.93
  -1  13   6    9.08    3.35
  -1  13   6    6.21    3.60
   1 -13  -6    4.77    3.05
   1 -13  -6    6.74    3.17
   1  13  -6    3.72    3.17
  -1 -13   5   21.71    3.96
  -1 -13   5   20.14    3.64
  -1  13   5   19.05    4.40
  -1  13   5   26.15    5.04
   1 -13  -5   12.14    3.49
   1 -13  -5   13.90    3.67
   1  13  -5   19.21    4.35
   1  13  -5   18.27    3.24
  -1 -13   4   33.87    4.45
  -1 -13   4   32.98    4.10
  -1  13   4   37.63    5.09
  -1  13   4   34.50    5.29
   1 -13  -4   21.25    4.04
   1 -13  -4   23.96    4.25
   1  13  -4   35.48    4.19
   1  13  -4   41.36    5.00
   1  13  -4   19.18    3.30
  -1 -13   3  307.81   11.49
  -1 -13   3  303.82   11.30
  -1  13   3  386.63   13.28
  -1  13   3  352.84   13.24
   1 -13  -3  225.72   10.66
   1 -13  -3  215.70   10.37
   1  13  -3  346.57   11.43
   1  13  -3  418.67   13.47
   1  13  -3  332.38   11.09
  -1 -13   2   54.34    5.17
  -1 -13   2   54.91    5.09
  -1  13   2   65.24    5.89
  -1  13   2   64.77    5.97
   1 -13  -2   49.39    5.12
   1 -13  -2   49.54    5.09
   1  13  -2   61.77    5.10
   1  13  -2   91.58    6.38
   1  13  -2   62.09    5.21
  -1 -13   1  120.61    7.33
  -1 -13   1  115.87    7.23
  -1  13   1  153.57    8.51
  -1  13   1  213.39    7.17
  -1  13   1  145.46    8.32
   1 -13  -1  104.31    6.91
   1 -13  -1  107.01    6.89
   1  13  -1  167.81    8.37
   1  13  -1  127.35    7.01
   1  13  -1  171.46    8.37
  -1 -13   0  224.19   10.08
  -1 -13   0  204.49    9.56
  -1  13   0  297.03   11.45
  -1  13   0  386.61   10.01
  -1  13   0  293.71   11.38
   1 -13   0  232.80    9.88
   1 -13   0  227.25    9.65
   1  13   0  379.25   12.64
   1  13   0  350.66   12.02
  -1 -13  -1  341.49   12.56
  -1 -13  -1  344.60   12.57
  -1 -13  -1  501.18   13.09
  -1  13  -1  482.72   14.44
  -1  13  -1  525.40   12.44
  -1  13  -1  465.95   14.16
   1 -13   1  393.52   12.43
   1 -13   1  388.43   12.30
   1  13   1  621.43   16.55
   1  13   1  628.27   16.61
  -1 -13  -2   43.00    4.91
  -1 -13  -2   49.60    5.26
  -1 -13  -2   65.46    5.10
  -1  13  -2   72.24    5.85
  -1  13  -2   48.79    4.46
  -1  13  -2   62.95    5.68
   1 -13   2   48.15    4.77
   1 -13   2   55.71    4.75
   1  13   2   83.23    6.69
   1  13   2   87.27    6.79
  -1 -13  -3    7.32    2.76
  -1 -13  -3    5.11    2.43
  -1 -13  -3    6.60    2.53
  -1  13  -3    5.38    2.70
  -1  13  -3    2.67    1.69
  -1  13  -3    7.51    2.80
   1 -13   3    3.90    2.25
   1 -13   3    3.87    2.07
   1  13   3   10.66    3.57
   1  13   3   12.13    3.82
  -1 -13  -4  102.15    7.60
  -1 -13  -4   95.85    7.34
  -1 -13  -4  165.04    8.38
  -1  13  -4  170.43    9.01
  -1  13  -4   97.12    7.20
  -1  13  -4  169.60    8.97
   1 -13   4  162.47    7.62
   1  13   4  244.42   11.68
   1  13   4  246.99   12.06
  -1 -13  -5   34.10    4.96
  -1 -13  -5   34.88    5.10
  -1 -13  -5   64.63    5.66
  -1  13  -5   72.61    6.39
  -1  13  -5   28.89    5.11
  -1  13  -5   45.48    5.20
   1  13   5   94.38    7.99
   1  13   5  103.91    8.69
  -1 -13  -6    7.74    2.91
  -1 -13  -6   10.20    3.52
  -1 -13  -6   17.99    3.91
  -1  13  -6   22.28    4.33
  -1  13  -6    4.15    3.32
  -1  13  -6    8.91    3.37
   1  13   6   30.41    5.95
   1  13   6   24.10    5.73
  -1 -13  -7   83.79    7.73
  -1 -13  -7   82.23    7.68
  -1 -13  -7  113.20    8.30
  -1  13  -7   39.82    6.36
   1  13   7  209.81   12.66
   1  13   7  210.10   12.98
  -1 -13  -8   60.75    7.05
  -1 -13  -8   60.12    6.88
  -1  13  -8   33.74    6.67
   1  13   8  141.80   11.25
   1  13   8  146.46   11.84
  -1 -13  -9   80.43    8.36
  -1 -13  -9   73.58    8.00
  -1  13  -9   44.06    7.81
   1  13   9  177.31   13.13
   1  13   9  185.04   13.74
  -1  13 -10   -1.47    4.19
   1  13  10    0.24    4.73
   1  13  10   -1.82    5.89
   1  13  11    5.09    6.39
  -1  14  11    4.62    4.78
  -1  14  11   -0.71    5.54
   1 -14 -11    2.13    4.58
  -1  14  10   30.18    6.96
  -1  14  10   33.80    7.81
   1 -14 -10   10.52    5.20
   1 -14 -10    7.02    4.59
   1  14 -10   10.31    5.63
  -1  14   9   30.60    6.26
  -1  14   9   51.13    8.20
   1 -14  -9   30.43    6.21
   1 -14  -9   27.73    5.85
   1  14  -9   15.94    5.81
  -1  14   8  145.86   10.83
  -1  14   8  161.07   11.70
   1 -14  -8   91.27    8.86
   1 -14  -8   89.75    8.85
   1  14  -8   49.83    7.63
  -1  14   7   30.69    5.57
  -1  14   7   25.32    5.77
   1 -14  -7   14.70    4.23
   1 -14  -7   12.33    4.17
   1  14  -7   14.95    4.83
  -1  14   6   85.59    7.95
  -1  14   6   78.64    7.98
   1 -14  -6   49.87    6.13
   1 -14  -6   53.08    6.52
   1  14  -6   40.18    6.10
  -1 -14   5   37.20    4.84
  -1 -14   5   39.34    4.88
  -1  14   5   31.73    5.32
  -1  14   5   27.29    5.24
   1 -14  -5   27.23    4.79
   1 -14  -5   25.61    4.73
   1  14  -5   30.13    5.28
  -1 -14   4   75.05    6.24
  -1 -14   4   75.52    6.17
  -1  14   4   81.71    7.12
  -1  14   4   78.15    7.08
   1 -14  -4   49.74    5.80
   1 -14  -4   52.69    5.89
   1  14  -4   84.41    6.37
   1  14  -4   79.48    6.74
   1  14  -4   77.79    5.95
  -1 -14   3   11.91    3.12
  -1 -14   3   12.35    3.08
  -1  14   3   12.48    3.44
  -1  14   3    5.92    3.05
   1 -14  -3    4.69    2.60
   1 -14  -3    4.47    2.36
   1  14  -3   12.73    3.24
   1  14  -3   12.88    3.59
   1  14  -3    9.00    2.77
  -1 -14   2  393.36   13.47
  -1 -14   2  394.00   13.46
  -1  14   2  484.99   15.67
  -1  14   2  489.63   15.75
   1 -14  -2  320.98   12.73
   1 -14  -2  329.36   12.85
   1  14  -2  505.52   14.56
   1  14  -2  682.87   16.92
  -1 -14   1  269.33   11.37
  -1 -14   1  262.74   11.13
  -1  14   1  346.00   13.09
  -1  14   1  346.40   13.03
   1 -14  -1  248.36   10.97
   1 -14  -1  249.70   10.88
   1  14  -1  369.01   12.73
   1  14  -1  376.23   12.77
  -1 -14   0  102.86    7.20
  -1 -14   0  106.07    7.28
  -1  14   0  152.13    8.69
  -1  14   0  135.85    8.29
   1 -14   0  125.44    7.73
   1 -14   0  111.55    7.18
   1  14   0  162.37    8.76
   1  14   0  204.25    8.97
   1  14   0  173.71    9.10
  -1 -14  -1   44.20    5.12
  -1 -14  -1   46.58    5.13
  -1 -14  -1   61.70    5.14
  -1  14  -1   61.92    5.77
  -1  14  -1   59.57    4.85
  -1  14  -1   60.89    5.85
   1 -14   1   52.93    5.11
   1 -14   1   46.54    4.82
   1  14   1   69.00    6.12
   1  14   1   72.89    6.51
  -1 -14  -2  104.29    7.56
  -1 -14  -2   96.00    7.24
  -1 -14  -2  151.58    7.73
  -1  14  -2  141.92    8.48
  -1  14  -2  118.04    6.82
  -1  14  -2  148.05    8.63
   1 -14   2  123.28    7.36
   1 -14   2  126.33    7.33
   1  14   2  170.59    9.55
   1  14   2  195.50   10.29
  -1 -14  -3  145.75    9.04
  -1 -14  -3  136.27    8.77
  -1 -14  -3  208.24    9.20
  -1  14  -3  213.31   10.17
  -1  14  -3  141.29    7.99
  -1  14  -3  215.81   10.28
   1 -14   3  191.04    8.92
   1 -14   3  202.41    9.08
   1  14   3  312.75   13.23
   1  14   3  302.93   12.99
  -1 -14  -4    6.53    3.01
  -1 -14  -4   16.64    3.93
  -1 -14  -4   21.06    3.73
  -1  14  -4   20.46    4.05
  -1  14  -4    9.09    3.43
  -1  14  -4   18.67    4.02
   1 -14   4   18.76    3.27
   1  14   4   26.77    5.25
   1  14   4   29.46    5.45
  -1 -14  -5    3.23    2.38
  -1 -14  -5    3.89    2.78
  -1 -14  -5    6.19    2.69
  -1  14  -5    6.49    3.12
  -1  14  -5   -0.72    2.85
  -1  14  -5    2.99    2.92
   1  14   5   13.46    4.63
  -1 -14  -6   58.57    6.40
  -1 -14  -6   63.26    6.83
  -1  14  -6  110.92    8.13
  -1  14  -6   33.69    5.86
  -1  14  -6   96.35    7.65
   1  14   6  142.15   10.30
   1  14   6  157.43   11.06
  -1 -14  -7   47.44    6.53
  -1 -14  -7   39.96    5.89
  -1  14  -7   26.15    5.59
   1  14   7  117.77    9.88
   1  14   7  132.24   10.69
  -1 -14  -8    8.14    4.07
  -1 -14  -8    3.38    3.29
  -1  14  -8    6.82    4.73
   1  14   8   17.65    5.86
   1  14   8   14.31    5.95
  -1 -14  -9   14.82    4.94
  -1 -14  -9   24.53    5.73
  -1  14  -9   10.26    5.60
   1  14   9   40.05    7.96
   1  14   9   42.95    8.39
  -1  14 -10   14.83    6.82
   1  14  10   51.86    9.16
   1  14  10   66.99   10.55
   1  14  11   20.92    7.84
  -1  15  11    5.04    4.89
   1 -15 -11    8.09    5.06
  -1  15  10    2.37    4.07
  -1  15  10   -0.27    5.18
   1 -15 -10    4.68    4.44
   1 -15 -10    5.71    4.51
   1  15 -10    2.19    5.60
  -1  15   9    3.43    4.24
  -1  15   9    6.65    5.31
   1 -15  -9    1.79    3.56
   1 -15  -9    3.80    3.94
   1  15  -9    0.07    4.11
  -1  15   8   12.55    4.73
  -1  15   8   13.11    5.59
   1 -15  -8    6.51    3.89
   1 -15  -8    7.84    3.84
   1  15  -8    1.68    3.65
  -1  15   7  112.71    9.65
  -1  15   7  111.36    9.91
   1 -15  -7   68.36    7.55
   1 -15  -7   65.06    7.58
   1  15  -7   51.91    7.33
  -1  15   6  183.41   11.40
  -1  15   6  179.40   11.46
   1 -15  -6  124.11    9.59
   1 -15  -6  115.79    9.28
   1  15  -6  116.63    9.35
  -1 -15   5   27.22    4.57
  -1 -15   5   26.64    4.35
  -1  15   5   28.94    5.40
  -1  15   5   39.35    6.43
   1 -15  -5   22.90    4.61
   1 -15  -5   23.79    4.80
   1  15  -5   22.99    4.87
  -1 -15   4   11.33    3.35
  -1 -15   4   14.89    3.46
  -1  15   4   18.00    4.06
  -1  15   4   17.33    4.52
   1 -15  -4    3.47    2.78
   1 -15  -4    8.78    3.48
   1  15  -4   15.08    3.65
   1  15  -4   14.93    4.12
   1  15  -4   14.98    3.61
  -1 -15   3  129.39    8.31
  -1 -15   3  134.58    8.31
  -1  15   3  154.45    9.65
  -1  15   3  152.85    9.58
   1 -15  -3   90.96    7.54
   1 -15  -3   87.97    7.24
   1  15  -3  149.21    8.52
   1  15  -3  174.73    9.56
   1  15  -3  143.25    8.22
  -1 -15   2  105.21    7.54
  -1 -15   2   93.48    7.08
  -1  15   2  131.97    8.78
  -1  15   2  140.16    9.09
   1 -15  -2   79.29    6.89
   1 -15  -2   86.18    7.05
   1  15  -2  133.78    8.01
   1  15  -2  174.74    9.19
   1  15  -2  137.48    8.21
  -1 -15   1   35.94    4.85
  -1 -15   1   42.04    4.86
  -1  15   1   66.90    6.43
  -1  15   1   53.66    5.82
   1 -15  -1   35.97    4.87
   1 -15  -1   37.51    4.91
   1  15  -1   56.11    5.79
   1  15  -1   52.55    5.52
  -1 -15   0  210.99   10.65
  -1 -15   0  226.59   10.97
  -1  15   0  303.84   12.70
  -1  15   0  283.94   12.26
   1 -15   0  236.36   10.86
   1 -15   0  232.97   10.72
   1  15   0  354.87   13.35
   1  15   0  445.86   13.43
   1  15   0  333.28   12.80
  -1 -15  -1  174.42    9.84
  -1 -15  -1  166.61    9.63
  -1 -15  -1  256.24   10.18
  -1  15  -1  242.81   11.33
  -1  15  -1  247.86   11.40
   1 -15   1  212.43   10.12
   1 -15   1  184.59    9.39
   1  15   1  306.42   12.68
   1  15   1  316.75   12.91
  -1 -15  -2   16.68    3.76
  -1 -15  -2   17.82    3.89
  -1 -15  -2   34.98    4.41
  -1  15  -2   31.41    4.80
  -1  15  -2   24.42    3.85
  -1  15  -2   26.87    4.54
   1 -15   2   21.43    3.97
   1 -15   2   26.64    4.07
   1  15   2   36.78    5.45
   1  15   2   41.62    5.79
  -1 -15  -3   16.88    3.96
  -1 -15  -3   17.68    4.05
  -1 -15  -3   25.66    3.93
  -1  15  -3   30.18    4.69
  -1  15  -3   18.50    4.00
  -1  15  -3   29.60    4.82
   1 -15   3   25.63    3.98
   1 -15   3   25.34    3.91
   1  15   3   35.92    5.74
   1  15   3   36.27    5.77
  -1 -15  -4    2.37    2.17
  -1 -15  -4    2.25    2.32
  -1 -15  -4   -0.09    1.83
  -1  15  -4    3.12    2.57
  -1  15  -4    1.83    2.99
  -1  15  -4    6.64    3.09
   1  15   4    4.95    3.48
   1  15   4    5.41    3.35
  -1 -15  -5   34.66    5.33
  -1 -15  -5   33.19    5.36
  -1  15  -5   63.60    6.44
  -1  15  -5   21.34    4.93
  -1  15  -5   53.59    6.07
   1  15   5  132.25    8.44
   1  15   5   84.34    8.26
  -1 -15  -6   12.66    3.96
  -1 -15  -6   15.38    4.29
  -1  15  -6   19.50    4.52
  -1  15  -6    9.79    4.16
  -1  15  -6   19.73    4.70
   1  15   6   29.94    6.17
   1  15   6   43.92    7.43
  -1 -15  -7    7.76    3.71
  -1 -15  -7    7.00    3.56
  -1  15  -7    2.20    3.83
   1  15   7   10.69    4.82
   1  15   7   14.28    6.12
  -1 -15  -8   28.86    5.87
  -1 -15  -8   29.58    5.97
  -1  15  -8   12.94    5.45
   1  15   8   54.69    8.62
   1  15   8   71.42    9.79
  -1 -15  -9   28.60    6.20
  -1 -15  -9   24.11    5.80
  -1  15  -9   16.15    6.43
   1  15   9   59.14    9.12
   1  15   9   63.76    9.90
   1  15  10    4.59    5.72
  -1  16  11    9.57    6.03
   1 -16 -11    8.27    5.24
  -1  16  10   11.28    5.76
  -1  16  10    8.45    6.50
   1 -16 -10   10.00    5.40
   1 -16 -10    3.41    4.29
  -1  16   9    1.48    4.25
  -1  16   9   -0.07    5.21
   1 -16  -9    1.47    3.42
   1 -16  -9    2.85    4.20
   1  16  -9    0.71    4.91
  -1  16   8    7.61    4.41
  -1  16   8    7.80    5.32
   1 -16  -8    2.64    3.38
   1 -16  -8    5.92    3.72
   1  16  -8    6.33    4.70
  -1  16   7   22.93    5.65
  -1  16   7   24.86    6.09
   1 -16  -7   15.35    4.60
   1 -16  -7   11.76    4.24
   1  16  -7   16.75    5.42
  -1  16   6   74.27    8.02
  -1  16   6   70.40    8.26
   1 -16  -6   42.14    6.27
   1 -16  -6   39.17    6.26
   1  16  -6   43.26    6.59
  -1 -16   5  119.52    8.59
  -1 -16   5  127.86    8.61
  -1  16   5  125.72    9.59
  -1  16   5  130.15    9.88
   1 -16  -5   76.72    7.67
   1 -16  -5   83.24    7.99
   1  16  -5  119.73    8.98
  -1 -16   4    0.70    2.46
  -1 -16   4   -0.30    1.98
  -1  16   4    0.20    3.00
   1 -16  -4    0.91    2.28
   1 -16  -4    0.09    2.25
   1  16  -4   -0.36    2.35
   1  16  -4   -1.43    2.60
   1  16  -4    0.30    2.28
  -1 -16   3   44.38    5.54
  -1 -16   3   46.72    5.27
  -1  16   3   57.25    6.41
  -1  16   3   54.59    6.33
   1 -16  -3   30.61    5.21
   1 -16  -3   26.46    4.74
   1  16  -3   46.98    5.55
   1  16  -3   67.20    6.53
   1  16  -3   46.08    5.44
  -1 -16   2   35.90    5.13
  -1 -16   2   45.19    5.23
  -1  16   2   53.49    6.04
  -1  16   2   43.28    5.85
   1 -16  -2   40.77    5.48
   1 -16  -2   30.74    4.87
   1  16  -2   55.80    5.98
   1  16  -2   59.66    6.12
   1  16  -2   51.50    5.70
  -1 -16   1   52.50    5.85
  -1 -16   1   45.55    5.26
  -1  16   1   58.93    6.32
  -1  16   1   62.35    6.50
   1 -16  -1   48.28    5.65
   1 -16  -1   46.98    5.34
   1  16  -1   58.41    6.02
   1  16  -1   40.81    4.89
   1  16  -1   60.31    6.14
  -1 -16   0    3.46    2.46
  -1 -16   0    2.20    2.01
  -1  16   0    2.89    2.47
  -1  16   0    4.49    2.95
   1 -16   0    1.67    2.14
   1 -16   0    2.83    2.09
   1  16   0    4.20    2.79
   1  16   0    4.68    2.96
   1  16   0    4.41    2.85
  -1 -16  -1   52.26    5.90
  -1 -16  -1   48.54    5.64
  -1 -16  -1   72.65    5.92
  -1  16  -1   70.94    6.86
  -1  16  -1   70.81    6.81
   1 -16   1   62.44    6.11
   1 -16   1   62.52    5.91
   1  16   1   89.68    7.60
   1  16   1   93.06    7.56
  -1 -16  -2   36.41    5.30
  -1 -16  -2   34.85    5.25
  -1 -16  -2   62.50    5.45
  -1  16  -2   54.31    5.95
  -1  16  -2   55.18    5.90
   1 -16   2   45.29    5.25
   1 -16   2   44.62    5.11
   1  16   2   67.88    6.81
   1  16   2   75.44    7.31
  -1 -16  -3   -0.71    1.39
  -1 -16  -3    0.75    1.91
  -1 -16  -3    2.56    2.27
  -1  16  -3   -0.67    2.02
  -1  16  -3    3.27    2.88
   1 -16   3    3.47    2.79
   1 -16   3    4.66    2.31
   1  16   3    2.14    2.92
   1  16   3    1.65    2.85
  -1 -16  -4    1.78    2.51
  -1 -16  -4    0.10    2.05
  -1  16  -4    1.37    2.28
  -1  16  -4    0.02    1.90
  -1  16  -4    5.85    3.40
   1  16   4    5.31    3.59
   1  16   4    3.73    3.44
  -1 -16  -5    1.76    2.42
  -1 -16  -5    2.57    2.46
  -1  16  -5    6.56    3.28
  -1  16  -5    1.40    3.45
  -1  16  -5    6.91    3.70
   1  16   5    7.01    4.12
  -1 -16  -6   15.39    4.36
  -1 -16  -6    9.63    3.72
  -1  16  -6   10.36    4.53
   1  16   6   37.74    6.59
   1  16   6   32.18    6.76
  -1 -16  -7   36.14    6.29
  -1 -16  -7   30.22    5.90
  -1  16  -7   14.62    5.43
   1  16   7   67.81    8.46
   1  16   7   75.24    9.14
  -1 -16  -8    8.99    4.30
  -1 -16  -8    5.76    4.08
  -1  16  -8    1.77    4.06
   1  16   8   15.04    6.13
   1  16   8   14.68    6.97
  -1 -16  -9    2.79    3.70
  -1 -16  -9    3.93    4.09
  -1  16  -9   -0.41    4.93
   1  16   9   -0.02    4.61
   1  16   9    0.58    5.84
   1  16  10    6.33    5.86
  -1  17  10   -1.67    3.90
   1 -17 -10    0.41    3.68
  -1  17   9   23.31    6.69
  -1  17   9   35.36    8.23
   1 -17  -9   19.24    5.87
   1 -17  -9   17.35    5.76
   1  17  -9    3.99    5.16
  -1  17   8    2.09    4.28
  -1  17   8    4.52    4.81
   1 -17  -8    3.87    4.03
   1 -17  -8    4.32    4.02
   1  17  -8    3.82    4.42
  -1  17   7    0.32    3.15
  -1  17   7    3.72    4.81
   1 -17  -7    0.64    2.88
   1 -17  -7    1.77    3.02
   1  17  -7    1.22    3.96
  -1  17   6   15.33    5.26
  -1  17   6   13.65    5.17
   1 -17  -6   10.83    4.16
   1 -17  -6    5.01    3.18
   1  17  -6    8.98    4.24
  -1 -17   5   32.53    5.39
  -1 -17   5   31.11    5.03
  -1  17   5   36.69    6.39
  -1  17   5   35.09    6.36
   1 -17  -5   21.09    4.89
   1 -17  -5   24.95    5.13
   1  17  -5   28.35    5.55
  -1 -17   4   -0.06    2.60
  -1 -17   4    0.10    2.11
  -1  17   4    1.81    3.53
   1 -17  -4    0.10    2.28
   1 -17  -4    2.11    2.26
   1  17  -4    1.12    2.83
   1  17  -4   -1.62    2.98
   1  17  -4    2.21    2.51
  -1 -17   3   37.71    5.60
  -1 -17   3   35.75    5.23
  -1  17   3   50.09    6.21
  -1  17   3   55.81    6.58
   1 -17  -3   29.01    5.14
   1 -17  -3   28.60    5.10
   1  17  -3   46.31    5.73
   1  17  -3   59.71    6.57
   1  17  -3   45.51    5.63
  -1 -17   2   57.91    6.44
  -1 -17   2   62.94    6.42
  -1  17   2   81.74    7.79
  -1  17   2   81.66    7.80
   1 -17  -2   54.44    6.33
   1 -17  -2   58.39    6.43
   1  17  -2   88.39    7.37
   1  17  -2   75.13    6.79
  -1 -17   1    7.73    3.11
  -1 -17   1    8.21    3.09
  -1  17   1    8.09    3.71
  -1  17   1    5.36    3.40
   1 -17  -1    6.42    3.02
   1 -17  -1    7.37    2.92
   1  17  -1    8.27    3.58
   1  17  -1    9.57    3.66
   1  17  -1    8.54    3.78
  -1 -17   0   -0.69    2.01
  -1 -17   0    1.66    2.28
  -1  17   0    2.79    2.86
  -1  17   0    4.60    2.80
   1 -17   0    1.53    2.18
   1 -17   0    0.02    1.65
   1  17   0    2.04    2.96
   1  17   0    0.70    2.54
  -1 -17  -1    8.05    3.41
  -1 -17  -1    6.02    2.95
  -1  17  -1    4.01    2.76
  -1  17  -1    8.66    3.68
   1 -17   1    7.43    3.11
   1 -17   1   10.64    3.32
   1  17   1    6.85    3.34
   1  17   1   13.01    4.16
  -1 -17  -2   14.82    3.86
  -1 -17  -2    7.92    3.34
  -1  17  -2   14.47    4.16
  -1  17  -2   12.82    3.95
   1 -17   2   12.74    3.47
   1 -17   2   19.00    3.96
   1  17   2   15.53    4.46
   1  17   2   20.32    5.02
  -1 -17  -3    0.84    2.22
  -1 -17  -3    2.35    2.75
  -1  17  -3    5.57    3.12
  -1  17  -3    0.80    2.59
   1 -17   3    2.38    2.78
   1 -17   3    1.69    2.17
   1  17   3    4.23    3.56
   1  17   3    6.95    3.77
  -1 -17  -4   -0.86    2.07
  -1 -17  -4   -0.60    1.97
  -1  17  -4    0.76    2.39
  -1  17  -4   -0.09    2.66
   1  17   4    0.68    3.10
   1  17   4   -0.22    3.26
  -1 -17  -5    7.83    3.81
  -1 -17  -5    4.24    2.94
  -1  17  -5    8.87    3.93
  -1  17  -5   12.07    4.32
   1  17   5   12.18    5.14
   1  17   5   18.21    5.71
  -1 -17  -6    8.29    4.09
  -1 -17  -6   12.74    4.30
  -1  17  -6    3.48    4.05
   1  17   6   20.21    5.87
   1  17   6   19.54    6.14
  -1 -17  -7    5.04    3.81
  -1 -17  -7    4.43    3.36
  -1  17  -7    2.08    4.43
   1  17   7    0.36    4.20
   1  17   7    3.43    4.95
  -1 -17  -8    3.83    3.74
  -1 -17  -8    9.74    4.63
  -1  17  -8    3.01    4.70
   1  17   8   10.67    5.66
   1  17   8    9.11    6.31
  -1 -17  -9    5.67    4.62
  -1 -17  -9    2.18    3.60
  -1  17  -9    1.01    5.18
   1  17   9    7.62    5.47
  -1 -17 -10    0.95    4.33
   1  17  10    0.45    4.79
  -1  18  10    9.12    5.22
   1 -18 -10    1.92    4.27
  -1  18   9   20.46    6.44
   1 -18  -9   11.00    5.32
  -1  18   8   23.33    6.49
  -1  18   8   23.71    7.44
   1 -18  -8   20.83    5.91
   1 -18  -8   14.00    5.12
   1  18  -8   13.18    5.44
  -1  18   7    2.75    4.20
  -1  18   7    6.86    4.72
   1 -18  -7    3.45    3.61
   1 -18  -7    1.22    3.44
   1  18  -7    0.83    3.59
  -1  18   6    1.48    3.75
  -1  18   6   -0.18    3.77
   1 -18  -6    0.58    2.91
   1 -18  -6    0.77    2.86
   1  18  -6    1.43    3.92
  -1 -18   5    4.58    3.68
  -1  18   5    3.52    3.58
  -1  18   5    1.07    3.48
   1 -18  -5    0.41    2.68
   1 -18  -5    2.06    2.68
   1  18  -5   -0.29    3.14
  -1 -18   4   42.71    6.11
  -1 -18   4   41.36    5.82
  -1  18   4   77.69    7.23
  -1  18   4   58.06    7.94
   1 -18  -4   35.67    6.06
   1 -18  -4   33.65    5.69
   1  18  -4   60.49    7.19
  -1 -18   3   34.17    5.48
  -1 -18   3   37.00    5.51
  -1  18   3   43.45    6.78
  -1  18   3   47.50    7.07
   1 -18  -3   24.70    5.18
   1 -18  -3   29.24    5.32
   1  18  -3   47.93    5.97
   1  18  -3   43.71    6.05
   1  18  -3   39.03    5.89
  -1 -18   2   -1.28    2.30
  -1 -18   2   -0.48    1.82
  -1  18   2    1.96    2.86
  -1  18   2    1.18    2.87
   1 -18  -2    0.64    2.25
   1 -18  -2    0.87    2.07
   1  18  -2   -0.17    2.66
   1  18  -2    0.24    2.14
   1  18  -2    1.75    2.89
  -1 -18   1   10.17    3.78
  -1 -18   1   11.99    3.78
  -1  18   1   16.01    4.78
  -1  18   1   15.00    4.57
   1 -18  -1    7.95    3.54
   1 -18  -1    9.50    3.56
   1  18  -1   15.06    4.34
   1  18  -1   17.63    4.80
  -1 -18   0    3.19    2.77
  -1 -18   0   10.37    3.60
  -1  18   0   11.22    4.00
  -1  18   0    7.78    3.74
   1 -18   0    9.88    3.67
   1 -18   0    8.74    3.32
   1  18   0   12.65    4.43
   1  18   0   12.28    4.22
  -1 -18  -1    3.54    2.88
  -1 -18  -1    2.75    2.41
  -1  18  -1    3.19    3.03
  -1  18  -1    1.15    2.90
   1 -18   1    6.13    3.07
   1 -18   1    4.62    2.69
   1  18   1    5.54    3.65
   1  18   1    1.80    3.42
  -1 -18  -2    8.54    3.53
  -1 -18  -2    4.88    3.01
  -1  18  -2   11.33    4.08
  -1  18  -2   12.63    4.19
   1 -18   2    8.86    3.33
   1 -18   2   10.69    3.50
   1  18   2   14.47    4.63
   1  18   2   15.02    4.99
  -1 -18  -3   -0.09    2.38
  -1 -18  -3   -0.09    2.32
  -1  18  -3    1.07    2.81
  -1  18  -3   -1.39    2.39
   1 -18   3   -0.02    2.54
   1 -18   3    0.03    2.02
   1  18   3    0.62    2.91
   1  18   3   -0.30    3.03
  -1 -18  -4    1.96    2.50
  -1 -18  -4    2.71    2.95
  -1  18  -4    1.69    3.11
  -1  18  -4    3.76    3.08
   1  18   4    2.84    3.75
   1  18   4    4.74    4.04
  -1 -18  -5    6.96    3.71
  -1 -18  -5    9.57    4.25
  -1  18  -5   19.53    4.90
  -1  18  -5   18.75    5.12
   1  18   5   19.51    5.76
   1  18   5   23.18    6.27
  -1 -18  -6   -0.55    2.69
  -1 -18  -6    0.09    2.97
   1  18   6    0.88    4.26
   1  18   6   -0.10    4.49
  -1 -18  -7    7.41    4.36
  -1 -18  -7    6.69    4.20
   1  18   7    9.10    5.24
   1  18   7   12.30    6.18
  -1 -18  -8    0.17    3.39
  -1 -18  -8    4.01    3.85
  -1  18  -8   -1.35    4.84
   1  18   8    9.09    5.45
  -1 -18  -9    7.83    4.90
   1  18   9   13.51    6.22
  -1  19   9   18.57    6.56
   1 -19  -9   13.17    5.90
  -1  19   8   39.98    7.99
   1 -19  -8   21.25    6.27
   1  19  -8   12.90    6.08
  -1  19   7    7.83    4.92
  -1  19   7   14.06    6.11
   1 -19  -7    8.25    4.69
   1 -19  -7    5.89    4.25
   1  19  -7    8.17    5.04
  -1  19   6   44.44    7.95
  -1  19   6   41.01    7.82
   1 -19  -6   24.62    5.96
   1 -19  -6   29.76    6.32
   1  19  -6   26.42    6.11
  -1  19   5   12.46    5.15
  -1  19   5   13.89    5.52
   1 -19  -5   12.15    4.50
   1 -19  -5    9.77    4.41
   1  19  -5    9.64    4.67
  -1 -19   4   50.58    6.76
  -1 -19   4   42.67    6.07
  -1  19   4   60.32    7.24
  -1  19   4   51.95    7.77
   1 -19  -4   29.52    5.82
   1 -19  -4   38.48    6.43
   1  19  -4   45.03    6.85
  -1 -19   3   55.66    7.03
  -1 -19   3   62.10    6.92
  -1  19   3   73.63    8.25
  -1  19   3   82.83    8.57
   1 -19  -3   51.17    6.92
   1 -19  -3   51.01    6.94
   1  19  -3   70.65    7.43
   1  19  -3   48.81    6.80
  -1 -19   2    7.58    3.80
  -1 -19   2    7.50    3.44
  -1  19   2   19.71    5.48
  -1  19   2   12.68    4.92
   1 -19  -2    8.04    3.68
   1 -19  -2   10.22    3.93
   1  19  -2   12.52    4.40
   1  19  -2   15.53    4.56
  -1 -19   1   11.60    4.10
  -1 -19   1   14.44    4.17
  -1  19   1   18.00    5.27
  -1  19   1   14.35    4.84
   1 -19  -1    8.06    3.69
   1 -19  -1   11.39    3.85
   1  19  -1   21.35    5.25
   1  19  -1   15.92    4.78
  -1 -19   0   52.17    6.52
  -1 -19   0   55.11    6.60
  -1  19   0   63.69    7.45
  -1  19   0   61.06    7.21
   1 -19   0   52.17    6.64
   1 -19   0   56.25    6.59
   1  19   0   66.82    7.48
   1  19   0   66.62    7.43
  -1 -19  -1    2.99    3.10
  -1 -19  -1    2.64    2.61
  -1  19  -1    1.33    2.91
  -1  19  -1    5.54    3.86
   1 -19   1    1.89    2.86
   1 -19   1    5.71    3.25
   1  19   1    7.49    3.86
   1  19   1    4.83    4.01
  -1 -19  -2   10.41    3.83
  -1 -19  -2   17.54    4.54
  -1  19  -2   16.95    4.81
  -1  19  -2   12.46    4.39
   1 -19   2   15.41    4.24
   1 -19   2   19.29    4.37
   1  19   2   22.53    5.84
   1  19   2   14.63    4.93
  -1 -19  -3   12.60    4.14
  -1 -19  -3    8.65    3.93
  -1  19  -3   15.07    4.70
  -1  19  -3   13.33    4.57
   1  19   3    7.96    4.19
   1  19   3   16.54    5.21
  -1 -19  -4   21.96    5.35
  -1 -19  -4   29.57    5.86
  -1  19  -4   45.50    6.61
  -1  19  -4   43.22    6.66
   1  19   4   57.21    8.03
   1  19   4   60.73    8.44
  -1 -19  -5   11.37    4.35
  -1 -19  -5   15.31    4.77
  -1  19  -5   12.64    4.88
   1  19   5   18.30    5.93
   1  19   5   22.51    6.50
  -1 -19  -6    1.77    3.17
  -1 -19  -6    1.15    3.16
   1  19   6    2.01    4.44
   1  19   6   -0.94    4.87
  -1 -19  -7    4.16    4.00
  -1 -19  -7    1.19    3.44
   1  19   7    2.03    4.68
   1  19   7    0.63    5.26
  -1 -19  -8   36.75    7.39
   1  19   8   71.18   10.60
  -1 -19  -9    9.77    5.45
   1  19   9    6.60    6.33
  -1  20   9    7.34    5.74
   1 -20  -9    8.59    5.14
  -1  20   8    2.82    4.51
   1 -20  -8    0.52    3.75
   1  20  -8    0.73    4.85
  -1  20   7    2.87    4.76
   1 -20  -7    1.40    3.85
   1  20  -7   -1.04    4.34
  -1  20   6   15.48    5.87
  -1  20   6   15.25    6.63
   1 -20  -6   12.95    5.02
   1 -20  -6   11.45    5.26
   1  20  -6   14.65    5.52
  -1  20   5  110.69   10.65
  -1  20   5  111.51   10.91
   1 -20  -5   71.57    8.58
   1 -20  -5   74.74    8.66
  -1 -20   4   45.91    6.95
  -1 -20   4   49.63    6.77
  -1  20   4   50.28    8.18
  -1  20   4   51.22    8.01
   1 -20  -4   31.50    6.20
   1 -20  -4   44.51    6.87
  -1 -20   3   21.15    5.21
  -1 -20   3   24.08    5.16
  -1  20   3   22.49    5.99
  -1  20   3   22.88    5.99
   1 -20  -3   16.93    4.98
   1 -20  -3   17.73    4.82
   1  20  -3   26.12    5.60
   1  20  -3   18.39    5.06
  -1 -20   2   12.02    4.51
  -1 -20   2   10.80    4.06
  -1  20   2   14.11    4.91
  -1  20   2   13.76    5.33
   1 -20  -2    8.46    4.12
   1 -20  -2   15.48    4.65
   1  20  -2   13.48    4.71
   1  20  -2   10.63    4.31
  -1 -20   1  103.34    9.17
  -1 -20   1   97.35    8.89
  -1  20   1  133.37   10.55
  -1  20   1  119.81   10.20
   1 -20  -1   99.45    9.01
   1 -20  -1   99.58    8.98
   1  20  -1  142.07   10.41
   1  20  -1  134.96   10.30
  -1 -20   0   -0.39    2.52
  -1 -20   0    4.82    3.04
  -1  20   0   -0.93    3.20
  -1  20   0    1.54    3.27
   1 -20   0   -0.21    2.48
   1 -20   0    0.65    2.40
   1  20   0   -0.34    2.67
   1  20   0    1.85    3.61
  -1 -20  -1   14.56    4.62
  -1 -20  -1    9.79    3.88
  -1  20  -1   22.67    5.72
  -1  20  -1   16.92    5.31
   1 -20   1   19.07    4.86
   1 -20   1   19.19    4.73
   1  20   1   24.07    6.08
   1  20   1   21.54    5.79
  -1 -20  -2   21.23    5.17
  -1 -20  -2   13.10    4.41
  -1  20  -2   24.49    5.60
  -1  20  -2   16.50    5.14
   1 -20   2   20.28    5.13
   1 -20   2   17.70    4.49
   1  20   2   17.36    5.37
   1  20   2   19.04    5.83
  -1 -20  -3   38.19    6.42
  -1 -20  -3   39.94    6.60
  -1  20  -3   62.49    7.55
   1  20   3   70.27    8.32
   1  20   3   70.68    9.07
  -1 -20  -4    2.51    2.98
  -1 -20  -4    2.58    3.67
  -1  20  -4    2.92    3.36
  -1  20  -4    1.48    3.47
   1  20   4    4.36    4.39
   1  20   4   12.49    5.51
  -1 -20  -5   11.67    4.79
  -1 -20  -5   18.02    5.45
   1  20   5   42.88    8.08
   1  20   5   32.75    7.66
  -1 -20  -6    4.79    3.91
  -1 -20  -6    2.75    3.61
   1  20   6    5.66    5.34
   1  20   6    5.53    5.60
  -1 -20  -7   53.53    8.34
   1  20   7  108.98   11.44
  -1 -20  -8    1.31    3.78
   1  20   8    2.30    5.43
  -1  21   8    4.11    5.22
   1 -21  -8   -0.54    3.53
  -1  21   7    3.79    5.13
   1 -21  -7    3.55    4.22
  -1  21   6   32.65    7.55
   1 -21  -6   20.23    5.85
  -1  21   5    3.97    4.83
  -1  21   5    2.98    4.80
   1 -21  -5    2.61    3.56
   1 -21  -5    3.33    3.78
  -1 -21   4  110.69    9.88
  -1 -21   4  114.28    9.77
  -1  21   4  144.86   12.11
  -1  21   4  117.85   10.79
   1 -21  -4   98.53    9.96
   1 -21  -4   95.38    9.58
  -1 -21   3   14.76    5.12
  -1 -21   3    7.16    4.02
  -1  21   3   15.84    5.63
  -1  21   3   18.19    5.94
   1 -21  -3    9.31    4.31
   1 -21  -3   10.82    4.36
   1  21  -3   20.32    5.53
  -1 -21   2   42.71    6.91
  -1 -21   2   38.15    6.24
  -1  21   2   47.12    7.80
  -1  21   2   40.73    7.48
   1 -21  -2   30.83    6.17
   1 -21  -2   33.10    6.03
   1  21  -2   44.94    7.01
   1  21  -2   40.13    6.70
  -1 -21   1    4.30    3.67
  -1 -21   1    6.86    3.53
  -1  21   1   10.21    4.66
  -1  21   1    6.83    4.34
   1 -21  -1    4.21    3.45
   1 -21  -1    3.89    3.59
   1  21  -1   10.93    4.89
   1  21  -1    3.38    4.30
  -1 -21   0   88.50    8.93
  -1 -21   0   77.80    8.16
  -1  21   0   89.05    8.94
  -1  21   0   93.17    9.11
   1 -21   0   74.60    8.16
   1 -21   0   68.78    7.82
   1  21   0   97.09    9.45
   1  21   0  111.57   10.22
  -1 -21  -1    6.66    3.77
  -1 -21  -1    9.00    4.00
  -1  21  -1   11.66    4.90
  -1  21  -1    8.03    4.42
   1 -21   1   12.94    4.71
   1 -21   1    6.12    3.51
   1  21   1   13.97    5.50
   1  21   1   16.66    5.46
  -1 -21  -2    5.31    3.63
  -1 -21  -2    5.81    3.54
  -1  21  -2    3.54    4.02
  -1  21  -2    1.52    4.06
   1 -21   2    7.96    4.07
   1 -21   2    7.37    3.86
   1  21   2    7.99    4.66
   1  21   2    3.74    4.35
  -1 -21  -3    9.34    4.34
  -1 -21  -3    6.94    4.07
  -1  21  -3    7.60    4.45
  -1  21  -3    9.49    4.74
   1  21   3   10.83    5.52
   1  21   3   18.47    6.11
  -1 -21  -4   63.15    8.39
  -1 -21  -4   60.68    8.24
  -1  21  -4   78.21    8.48
  -1  21  -4   84.08    8.99
   1  21   4   97.89   10.45
   1  21   4  115.30   11.05
  -1 -21  -5    8.04    4.23
  -1 -21  -5    8.93    5.00
   1  21   5   20.06    6.95
   1  21   5   19.99    7.03
  -1 -21  -6   12.65    5.29
   1  21   6   28.08    7.50
  -1 -21  -7    1.68    3.71
   1  21   7    1.00    4.84
  -1  22   7    2.03    4.67
   1 -22  -7    1.16    3.34
  -1  22   6   16.25    6.41
   1 -22  -6    7.10    4.65
  -1  22   5   56.36    9.42
   1 -22  -5   32.42    7.09
  -1 -22   4    8.74    4.84
  -1  22   4    1.95    4.34
  -1  22   4   -0.23    4.33
   1 -22  -4    1.17    3.57
   1 -22  -4    1.70    3.91
  -1 -22   3   15.26    5.23
  -1 -22   3    6.47    3.92
  -1  22   3   10.62    5.42
  -1  22   3   11.41    6.27
   1 -22  -3    8.44    4.20
   1 -22  -3   10.78    4.81
  -1 -22   2   17.85    5.38
  -1 -22   2   14.33    4.95
  -1  22   2   18.58    5.99
  -1  22   2   18.97    6.29
   1 -22  -2   14.34    5.15
   1 -22  -2   17.78    5.24
   1  22  -2   18.09    5.56
   1  22  -2   21.44    5.95
  -1 -22   1   77.45    8.82
  -1 -22   1   73.03    8.32
  -1  22   1   99.98    9.92
  -1  22   1   82.91    9.11
   1 -22  -1   75.28    8.61
   1 -22  -1   84.21    8.93
   1  22  -1  108.76   10.00
   1  22  -1   98.91    9.57
  -1 -22   0    3.48    3.57
  -1 -22   0    3.19    3.05
  -1  22   0    3.25    3.80
  -1  22   0    5.42    4.23
   1 -22   0    0.04    3.13
   1 -22   0    2.08    2.98
   1  22   0    2.13    4.20
   1  22   0    2.86    4.33
  -1 -22  -1    3.77    3.33
  -1 -22  -1    1.42    2.67
  -1  22  -1    0.37    3.90
  -1  22  -1   -0.49    3.77
   1 -22   1    5.76    3.78
   1 -22   1    5.35    3.66
   1  22   1    4.81    4.73
   1  22   1    1.41    4.34
  -1 -22  -2   14.08    4.98
  -1 -22  -2   14.78    5.25
  -1  22  -2   18.31    5.79
  -1  22  -2   15.34    5.61
   1 -22   2   16.87    5.08
   1 -22   2   17.41    5.04
   1  22   2   22.03    6.37
   1  22   2   23.53    6.87
  -1 -22  -3   17.68    5.46
  -1 -22  -3   31.06    6.52
  -1  22  -3   41.38    7.41
   1  22   3   50.77    8.45
   1  22   3   53.25    9.23
  -1 -22  -4    2.00    3.06
  -1  22  -4   -0.04    3.72
   1  22   4    0.84    4.43
   1  22   4   -2.32    5.08
  -1 -22  -5    3.21    3.81
   1  22   5    4.50    5.06
  -1 -22  -6    6.94    4.46
   1  22   6    4.29    5.50
  -1  23   6    4.88    5.32
   1 -23  -6    0.00    3.60
  -1  23   5    1.57    4.50
   1 -23  -5    5.03    4.23
  -1 -23   4    6.11    4.83
  -1  23   4    3.88    4.40
   1 -23  -4    3.54    4.04
  -1 -23   3    2.67    4.10
  -1 -23   3   -0.40    3.14
  -1  23   3    1.94    4.50
  -1  23   3    5.48    5.29
   1 -23  -3    0.20    3.38
   1 -23  -3    3.31    4.08
  -1 -23   2    2.22    3.98
  -1 -23   2    2.27    3.15
  -1  23   2    2.55    4.48
  -1  23   2    2.62    5.17
   1 -23  -2    1.27    3.42
   1 -23  -2   -1.77    3.12
   1  23  -2    1.02    4.07
  -1 -23   1   12.82    4.98
  -1 -23   1   18.48    5.52
  -1  23   1   14.10    5.64
  -1  23   1   14.08    5.86
   1 -23  -1   15.81    5.19
   1 -23  -1   20.79    5.60
   1  23  -1   28.17    6.96
   1  23  -1   25.19    6.71
  -1 -23   0   16.63    5.68
  -1 -23   0   17.67    5.57
  -1  23   0   21.28    6.26
  -1  23   0   23.20    6.23
   1 -23   0   24.67    5.95
   1 -23   0   23.48    5.86
   1  23   0   23.99    6.40
   1  23   0   26.69    6.76
  -1 -23  -1   10.10    4.73
  -1 -23  -1   12.03    5.03
  -1  23  -1   12.13    5.55
  -1  23  -1    5.27    4.67
   1 -23   1   13.50    5.24
   1 -23   1   14.03    4.95
   1  23   1   16.12    6.02
   1  23   1   12.20    6.18
  -1 -23  -2   18.07    5.62
  -1 -23  -2   13.04    5.54
  -1  23  -2   16.51    6.12
  -1  23  -2   11.91    5.53
   1 -23   2   19.06    5.64
   1  23   2   17.11    6.07
   1  23   2   18.11    6.98
  -1 -23  -3    0.67    3.35
  -1  23  -3    2.11    4.33
  -1  23  -3    0.78    4.01
   1  23   3    2.12    4.89
  -1 -23  -4    0.65    3.23
  -1  23  -4    4.90    4.72
   1  23   4    7.94    5.63
  -1 -23  -5    1.61    3.72
   1  23   5    2.25    5.29
  -1 -23  -6   -0.84    3.44
   1  23   6   -1.42    5.04
  -1  24   5   -1.43    4.74
   1 -24  -5    2.80    4.07
  -1  24   4    4.42    4.98
   1 -24  -4    4.89    4.08
  -1 -24   3    0.16    3.98
  -1 -24   3    1.16    4.04
  -1  24   3    4.26    4.85
   1 -24  -3    1.57    3.60
  -1 -24   2    6.16    4.75
  -1 -24   2    8.29    5.01
  -1  24   2    7.55    4.98
   1 -24  -2    3.80    4.13
   1  24  -2   11.52    5.85
  -1 -24   1    3.39    4.18
  -1 -24   1   -2.71    3.38
  -1  24   1    2.06    4.67
   1 -24  -1   -3.45    2.92
   1 -24  -1   -0.15    3.90
   1  24  -1    3.11    4.71
   1  24  -1    2.06    4.98
  -1 -24   0   -0.02    3.54
  -1  24   0    4.09    4.65
  -1  24   0    1.92    4.92
   1 -24   0    0.14    3.45
   1 -24   0    3.43    4.60
   1  24   0    0.40    4.07
   1  24   0   -0.01    5.75
  -1 -24  -1    8.04    4.88
  -1  24  -1   13.79    5.94
  -1  24  -1   12.61    6.02
   1 -24   1   10.12    4.95
   1 -24   1    4.37    4.48
   1  24   1   11.71    6.09
   1  24   1   17.27    7.33
  -1 -24  -2    0.18    3.62
  -1  24  -2    0.13    3.90
  -1  24  -2    2.85    5.26
   1  24   2    2.05    5.07
  -1 -24  -3    3.16    3.82
  -1  24  -3    2.32    4.38
   1  24   3    5.43    5.33
  -1 -24  -4    0.56    3.53
   1  24   4    0.36    5.00
  -1 -25   3    4.50    5.05
  -1  25   3    1.29    5.00
   1 -25  -3   -0.67    3.72
  -1 -25   2    2.32    4.86
  -1  25   2    8.02    5.93
   1 -25  -2    3.76    4.34
   1  25  -2    5.11    5.21
  -1 -25   1   10.82    5.45
  -1  25   1    3.91    4.69
   1 -25  -1    3.69    4.61
   1  25  -1    0.50    4.19
   1  25  -1   10.70    6.64
  -1 -25   0   32.38    7.31
  -1  25   0   39.48    8.13
   1 -25   0   42.04    7.96
   1  25   0   37.11    7.89
  -1 -25  -1    3.49    4.28
  -1  25  -1    6.97    5.30
   1 -25   1    4.80    4.78
   1  25   1    8.48    5.57
  -1 -25  -2    3.54    4.00
  -1  25  -2    0.63    4.77
   1  25   2   -3.03    4.64
  -1 -25  -3   -2.29    3.31
  -1  25  -3    2.33    5.01
   1  25   3    4.01    5.53
   2   0 -13   -1.04    4.26
   2   0 -12    2.81    4.16
   2   0 -11    4.71    3.90
   2   0 -10   79.25    7.74
  -2   0   9   75.35    6.50
   2   0  -9   87.63    6.94
   2   0  -9   35.84    5.52
  -2   0   8    7.75    3.05
   2   0  -8    7.18    2.51
   2   0  -8    2.72    2.70
  -2   0   7   14.84    3.04
  -2   0   7   21.54    2.67
   2   0  -7    5.88    2.62
  -2   0   6 1096.21   18.22
  -2   0   6 1131.53   18.45
  -2   0   6 1275.85   14.94
   2   0  -6  490.92   12.58
  -2   0   5   97.97    5.31
  -2   0   5  102.41    3.80
   2   0  -5   47.75    3.74
  -2   0   4  336.49    8.74
  -2   0   4  309.04    5.46
   2   0  -4  233.92    6.94
  -2   0   3  155.29    5.47
  -2   0   3  130.09    3.04
   2   0  -3  160.86    5.04
  -2   0   2  851.71   11.52
  -2   0   2  683.76    7.22
   2   0  -2  992.35   10.92
  -2   0   1  114.36    3.81
  -2   0   1   26.55    1.66
  -2   0   1   94.59    2.88
  -2   0   0   29.35    1.78
  -2   0   0   20.09    1.61
  -2   0   0   27.86    1.94
  -2   0  -1   23.87    1.43
  -2   0  -1   16.67    1.74
  -2   0  -1   20.29    1.99
  -2   0  -2 2097.75   15.00
  -2   0  -2 1466.13   17.22
  -2   0  -2 2143.77   21.04
  -2   0  -3   76.09    2.45
  -2   0  -3   57.12    3.94
  -2   0  -3   79.85    4.58
  -2   0  -4    2.10    1.48
  -2   0  -4    3.15    0.76
  -2   0  -4    2.14    1.42
  -2   0  -4    2.05    1.42
  -2   0  -5    5.90    2.20
  -2   0  -5    3.30    1.01
  -2   0  -5    6.01    2.22
  -2   0  -5    9.04    2.50
  -2   0  -6  505.10   14.27
  -2   0  -6  304.39   11.73
  -2   0  -6  513.48   14.40
  -2   0  -7   13.31    3.53
  -2   0  -7   10.50    3.37
  -2   0  -7   16.53    3.79
  -2   0  -8  549.40   16.95
  -2   0  -8  330.42   14.18
  -2   0  -9    1.74    2.99
  -2   0  -9    0.94    2.70
   2   0   9    2.87    4.29
  -2   0 -10  111.34    9.12
  -2   0 -10   63.02    7.74
   2   0  10  158.90   11.25
  -2   0 -11   -1.42    2.58
  -2   0 -11   -1.76    3.12
   2  -1 -13    5.65    4.89
   2   1 -13    2.30    5.03
   2  -1 -12   -0.98    3.68
   2   1 -12   -2.41    3.57
   2  -1 -11    5.64    4.12
   2   1 -11    8.82    4.46
   2  -1 -10   16.65    4.70
   2   1 -10    8.36    4.11
  -2  -1   9  100.78    7.44
  -2   1   9   95.34    7.19
   2  -1  -9  100.82    7.19
   2  -1  -9   44.29    5.85
   2   1  -9  111.76    7.37
   2   1  -9   41.98    6.03
  -2  -1   8   33.76    4.49
  -2   1   8   33.39    4.57
   2  -1  -8    1.92    1.79
   2  -1  -8   14.68    3.61
   2   1  -8   12.20    3.68
  -2  -1   7  296.75   10.21
  -2  -1   7  279.13    9.86
  -2  -1   7  350.64    8.40
  -2   1   7  279.85   10.16
  -2   1   7  335.85    9.08
   2  -1  -7  293.55   10.27
   2  -1  -7  121.08    7.07
   2   1  -7  109.79    6.91
  -2  -1   6  212.46    8.12
  -2  -1   6  244.68    6.21
  -2   1   6  200.58    8.18
  -2   1   6  229.44    6.83
   2  -1  -6  244.83    8.80
   2  -1  -6   97.40    5.69
   2   1  -6   96.09    5.99
  -2  -1   5  275.46    8.51
  -2  -1   5  317.78    5.93
  -2   1   5  285.46    8.84
  -2   1   5  283.45    6.74
   2  -1  -5  137.87    5.99
   2   1  -5  172.24    6.98
  -2  -1   4   53.66    3.63
  -2  -1   4   58.02    2.06
  -2   1   4   54.73    3.77
  -2   1   4   50.93    2.62
   2  -1  -4   33.39    2.77
   2   1  -4   43.88    3.28
  -2  -1   3  310.80    7.66
  -2   1   3  294.97    7.59
  -2   1   3  239.09    4.91
   2  -1  -3  290.92    6.34
   2   1  -3  326.43    7.56
  -2  -1   2 1889.57   17.51
  -2  -1   2 1563.55   14.23
  -2   1   2 2054.41   18.32
  -2   1   2 1675.17   13.37
   2  -1  -2 2359.60   16.64
   2   1  -2 2339.77   18.51
  -2  -1   1 4277.35   25.55
  -2  -1   1 3114.06   20.74
  -2  -1   1 4123.90   24.02
  -2   1   1 4701.57   26.64
  -2   1   1 3171.19   19.86
  -2  -1   0  213.57    5.27
  -2  -1   0  289.24    5.85
  -2   1   0  331.86    5.56
  -2   1   0  196.92    4.45
  -2   1   0  277.05    5.99
  -2  -1  -1   87.21    2.97
  -2  -1  -1   64.88    3.29
  -2  -1  -1   91.84    3.91
  -2   1  -1  105.25    2.58
  -2   1  -1   72.22    3.30
  -2   1  -1   98.53    4.10
  -2  -1  -2 1094.47   10.81
  -2  -1  -2  871.09   13.41
  -2  -1  -2 1251.22   16.12
  -2   1  -2 1220.06   11.84
  -2   1  -2  822.06   12.77
  -2   1  -2 1237.20   15.96
  -2  -1  -3  542.23    7.84
  -2  -1  -3  490.16   11.26
  -2  -1  -3  731.39   13.63
  -2   1  -3  427.71   10.46
  -2   1  -3  697.53   13.17
  -2  -1  -4    2.24    1.58
  -2  -1  -4    2.17    0.81
  -2  -1  -4    0.30    1.32
  -2  -1  -4    1.46    1.41
  -2   1  -4    1.40    1.40
  -2   1  -4    1.94    0.53
  -2   1  -4    1.56    1.30
  -2   1  -4    2.28    1.58
  -2  -1  -5   88.71    5.90
  -2  -1  -5   36.44    2.56
  -2  -1  -5   60.60    4.92
  -2  -1  -5   95.64    6.11
  -2   1  -5   82.12    5.50
  -2   1  -5   47.71    2.17
  -2   1  -5   59.38    5.00
  -2   1  -5   89.85    5.75
  -2  -1  -6   26.95    4.05
  -2  -1  -6   15.34    3.48
  -2  -1  -6   26.37    4.03
  -2   1  -6   30.12    4.04
  -2   1  -6   17.89    3.76
  -2   1  -6   32.45    4.39
  -2  -1  -7  653.11   17.43
  -2  -1  -7  434.53   15.09
  -2   1  -7  659.94   17.24
  -2   1  -7  396.01   14.52
  -2   1  -7  685.10   17.74
  -2  -1  -8   43.87    5.79
  -2  -1  -8   24.15    4.76
  -2   1  -8   47.74    5.91
  -2   1  -8   26.86    5.21
  -2   1  -8   45.29    5.76
   2   1   8   72.21    7.39
  -2  -1  -9    6.45    3.27
  -2  -1  -9    3.69    3.18
  -2   1  -9    4.05    3.13
  -2   1  -9    3.46    3.16
   2   1   9    5.68    4.73
  -2  -1 -10    3.82    3.32
  -2  -1 -10   -0.77    2.98
  -2   1 -10    0.74    3.21
  -2   1 -10    2.90    3.45
   2   1  10   -0.27    4.71
  -2  -1 -11   45.50    6.88
  -2  -1 -11   34.78    6.79
  -2   1 -11   24.49    6.34
   2  -2 -13    7.60    5.26
   2   2 -13    6.19    5.38
   2  -2 -12   -0.60    3.66
   2   2 -12   -1.06    3.53
   2  -2 -11   13.23    4.71
   2   2 -11   13.27    4.89
   2  -2 -10   23.59    4.90
   2   2 -10   12.92    4.37
  -2  -2   9   82.26    6.69
  -2   2   9  103.13    7.59
   2  -2  -9   43.60    5.68
   2   2  -9   30.49    5.38
  -2  -2   8   20.01    3.72
  -2  -2   8   14.44    3.19
  -2   2   8   14.18    3.56
   2  -2  -8   15.74    3.43
   2  -2  -8    8.61    3.17
   2   2  -8    4.36    2.90
  -2  -2   7   44.14    4.65
  -2  -2   7   38.66    4.20
  -2   2   7   39.72    4.56
  -2   2   7   42.88    3.75
   2  -2  -7   40.42    4.45
   2  -2  -7   18.18    3.38
   2   2  -7   21.72    3.88
  -2  -2   6  257.31    8.84
  -2  -2   6  326.47    6.71
  -2   2   6  250.09    9.25
  -2   2   6  287.43    8.07
   2  -2  -6  286.41    9.72
   2  -2  -6  112.30    6.03
   2   2  -6  136.15    7.17
  -2  -2   5  123.57    5.81
  -2  -2   5  158.19    3.85
  -2   2   5  123.42    4.89
   2  -2  -5  146.80    6.56
   2  -2  -5   55.39    3.87
   2   2  -5   87.68    5.22
  -2  -2   4  102.95    4.95
  -2  -2   4  120.40    2.49
  -2   2   4  107.95    4.11
   2  -2  -4   51.78    3.18
   2   2  -4  103.67    5.15
  -2  -2   3  901.57   13.17
  -2   2   3 1011.69   14.38
  -2   2   3  747.01    9.94
   2  -2  -3  632.86    8.82
   2   2  -3 1084.34   14.51
  -2  -2   2 7600.69   38.18
  -2   2   2 8539.10   40.91
  -2   2   2 6429.09   41.98
   2  -2  -2 9293.51   63.37
   2   2  -2 9074.74   48.58
   2   2  -2 9753.32   95.07
  -2  -2   1  614.15    9.43
  -2  -2   1  471.47    8.16
  -2  -2   1  650.80    7.48
  -2   2   1  674.45    9.48
  -2   2   1  442.03    5.45
  -2   2   1  539.93    8.23
  -2  -2   0   84.68    3.33
  -2  -2   0   62.93    3.12
  -2  -2   0   60.99    2.79
  -2   2   0   79.36    2.87
  -2   2   0   51.75    2.23
  -2   2   0   63.78    3.10
  -2  -2  -1    5.59    1.02
  -2  -2  -1    4.16    1.18
  -2  -2  -1    7.06    1.38
  -2   2  -1   10.76    1.04
  -2   2  -1    0.27    0.60
  -2   2  -1    6.49    1.37
  -2  -2  -2  122.22    4.00
  -2  -2  -2  108.64    4.89
  -2  -2  -2  156.65    5.90
  -2   2  -2   70.34    3.89
  -2   2  -2  108.92    4.89
  -2  -2  -3  839.34   11.02
  -2  -2  -3  872.54   15.16
  -2  -2  -3 1333.56   18.70
  -2   2  -3  729.32   13.67
  -2   2  -3 1220.67   17.51
  -2  -2  -4  100.50    5.75
  -2  -2  -4   55.87    3.14
  -2  -2  -4   74.11    4.99
  -2  -2  -4  103.85    5.90
  -2   2  -4  105.09    5.71
  -2   2  -4   61.59    4.73
  -2   2  -4  110.16    5.83
  -2  -2  -5   12.18    2.70
  -2  -2  -5    5.83    1.45
  -2  -2  -5    8.50    2.60
  -2  -2  -5   14.19    2.97
  -2   2  -5   14.08    2.80
  -2   2  -5    5.70    2.39
  -2   2  -5   11.53    2.65
  -2  -2  -6  214.72    9.67
  -2  -2  -6  139.26    8.06
  -2   2  -6  214.18    9.37
  -2   2  -6  120.34    7.64
  -2   2  -6  219.66    9.53
  -2  -2  -7   68.14    6.30
  -2  -2  -7   56.61    5.76
  -2   2  -7   74.89    6.24
  -2   2  -7   40.77    5.64
  -2   2  -7   72.29    6.34
   2   2   7  113.03    8.18
  -2  -2  -8   91.22    7.50
  -2  -2  -8   49.15    6.07
  -2   2  -8   84.12    7.09
  -2   2  -8   43.08    6.10
  -2   2  -8   77.56    6.93
   2   2   8  130.21    9.24
  -2  -2  -9   43.10    6.05
  -2  -2  -9   28.03    5.55
  -2   2  -9   36.93    5.64
  -2   2  -9   18.27    4.82
  -2   2  -9   36.17    5.74
   2   2   9   60.89    7.57
  -2  -2 -10    4.79    3.32
  -2  -2 -10    4.30    3.36
  -2   2 -10    5.80    3.89
  -2   2 -10    2.17    3.40
   2   2  10    8.97    5.27
  -2  -2 -11   -0.26    3.38
  -2  -2 -11    0.29    2.94
  -2   2 -11    0.37    3.32
   2  -3 -13    5.70    5.09
   2   3 -13   13.84    6.50
   2  -3 -12   -1.26    3.56
   2   3 -12   -1.17    3.39
   2  -3 -11    2.99    3.67
   2   3 -11    2.71    3.70
   2  -3 -10   71.69    7.03
   2   3 -10   55.38    6.76
  -2  -3   9   30.98    4.51
   2  -3  -9   31.35    4.80
   2  -3  -9   21.36    4.40
   2   3  -9    6.58    3.76
  -2  -3   8   33.45    4.45
  -2  -3   8   32.05    4.13
  -2   3   8   30.23    4.68
  -2   3   8   29.36    3.87
   2  -3  -8   27.03    4.31
   2  -3  -8   13.00    3.44
   2   3  -8   12.18    3.67
  -2  -3   7   57.18    5.12
  -2  -3   7   55.85    4.74
  -2   3   7   46.47    4.98
  -2   3   7   61.85    4.63
   2  -3  -7   68.58    5.52
   2  -3  -7   33.77    4.01
   2   3  -7   28.09    4.38
  -2  -3   6  390.19   10.80
  -2  -3   6  511.82    8.07
  -2   3   6  414.76   11.91
  -2   3   6  434.57   10.49
   2  -3  -6  424.95   12.03
   2  -3  -6  195.75    7.65
   2   3  -6  242.87    9.54
  -2  -3   5   47.55    3.85
  -2  -3   5   62.03    2.38
  -2   3   5   54.25    4.56
  -2   3   5   44.62    3.34
   2  -3  -5   55.22    4.27
   2  -3  -5   24.85    2.87
   2   3  -5   41.50    3.97
  -2  -3   4    1.00    0.98
  -2   3   4    0.16    0.67
   2  -3  -4    1.85    1.24
   2  -3  -4    0.49    1.01
   2   3  -4   -0.12    1.07
  -2  -3   3 1132.24   15.13
  -2   3   3  929.63   12.27
   2  -3  -3 1329.59   17.01
   2  -3  -3  595.63    8.05
   2   3  -3 1359.84   17.05
  -2  -3   2 2775.87   22.70
   2  -3  -2 3343.35   25.12
   2  -3  -2 2449.06   17.99
   2   3  -2 3330.79   25.02
   2   3  -2 3536.60   24.99
  -2  -3   1  142.99    4.84
  -2  -3   1  107.62    4.21
  -2   3   1   91.19    1.98
  -2   3   1  108.82    4.06
   2  -3  -1  173.50    5.07
   2   3  -1  173.00    4.07
  -2  -3   0   24.85    2.08
  -2  -3   0   20.87    1.98
  -2   3   0   29.18    1.72
  -2   3   0   37.36    2.61
   2  -3   0   29.44    1.94
   2   3   0   59.59    2.94
  -2  -3  -1   64.16    3.13
  -2  -3  -1  106.20    4.52
  -2   3  -1   64.68    3.14
  -2   3  -1  122.24    4.87
   2  -3   1  142.46    3.30
  -2  -3  -2  920.70   12.19
  -2  -3  -2  898.89   14.22
  -2   3  -2  706.54   11.87
  -2   3  -2 1138.34   15.85
  -2  -3  -3   85.89    3.97
  -2  -3  -3   99.58    5.27
  -2   3  -3   73.90    4.63
  -2   3  -3  135.17    6.01
  -2  -3  -4  237.77    8.86
  -2  -3  -4  111.78    4.73
  -2  -3  -4  159.69    7.31
  -2   3  -4  211.27    8.05
  -2   3  -4  127.10    6.64
  -2   3  -4  228.57    8.35
   2   3   4  327.79   10.47
  -2  -3  -5    3.28    2.08
  -2  -3  -5    0.60    1.05
  -2  -3  -5    2.76    1.82
  -2   3  -5    2.99    1.70
  -2   3  -5    2.59    2.01
  -2   3  -5    1.79    1.74
   2   3   5    1.87    2.46
  -2  -3  -6  159.38    8.43
  -2  -3  -6   57.03    3.94
  -2  -3  -6  100.94    7.00
  -2   3  -6  147.54    7.83
  -2   3  -6   92.20    6.99
  -2   3  -6  155.53    8.16
   2   3   6  236.52   10.55
  -2  -3  -7   22.03    4.22
  -2  -3  -7   17.51    3.88
  -2   3  -7   19.15    3.85
  -2   3  -7   13.29    3.89
  -2   3  -7   19.11    3.99
   2   3   7   31.90    5.09
  -2  -3  -8   59.54    6.09
  -2  -3  -8   37.45    5.54
  -2   3  -8   53.70    5.91
  -2   3  -8   27.20    5.22
  -2   3  -8   57.09    6.12
   2   3   8   80.97    7.71
  -2  -3  -9    3.19    2.84
  -2  -3  -9    0.83    2.55
  -2   3  -9    0.39    2.79
  -2   3  -9    0.70    2.99
  -2   3  -9    1.48    2.91
   2   3   9    2.47    4.45
  -2  -3 -10    1.17    2.92
  -2  -3 -10    1.35    3.04
  -2   3 -10   -0.39    2.89
  -2   3 -10   -0.96    2.96
  -2   3 -10    2.16    3.40
   2   3  10    3.01    4.85
  -2  -3 -11    0.95    3.25
  -2  -3 -11   -0.73    3.24
  -2   3 -11   -2.06    2.89
   2  -4 -12    6.99    4.55
   2   4 -12    5.50    4.77
   2  -4 -11   14.64    4.73
   2   4 -11    7.78    4.23
   2  -4 -10   28.48    4.92
   2  -4 -10   37.09    5.73
   2  -4 -10   29.77    5.32
   2   4 -10   22.19    5.49
  -2  -4   9  154.98    8.51
   2  -4  -9  144.10    8.99
   2  -4  -9  158.29    9.34
   2  -4  -9   80.25    6.88
   2   4  -9   72.93    7.40
  -2  -4   8   -1.23    1.95
  -2  -4   8   -0.76    1.97
  -2   4   8    1.30    2.31
  -2   4   8    3.66    2.23
   2  -4  -8    0.39    2.44
   2  -4  -8    2.06    2.40
   2  -4  -8   -0.18    1.79
   2   4  -8   -2.12    2.03
  -2  -4   7  226.88    8.97
  -2  -4   7  257.52    9.44
  -2   4   7  256.53    9.24
  -2   4   7  262.77    9.26
   2  -4  -7  238.45    9.95
   2  -4  -7  124.37    6.80
   2   4  -7  116.67    7.59
  -2  -4   6  222.16    8.36
  -2  -4   6  207.58    8.05
  -2   4   6  226.42    9.25
  -2   4   6  225.42    8.03
   2  -4  -6  233.28    9.27
   2  -4  -6  117.72    5.92
   2   4  -6  131.36    7.39
  -2  -4   5  150.32    6.51
  -2   4   5  179.35    7.83
  -2   4   5  162.99    6.39
   2  -4  -5  159.95    7.26
   2  -4  -5   79.25    4.31
   2   4  -5  153.56    7.27
   2   4  -5  165.68    3.86
  -2  -4   4   13.41    2.14
  -2   4   4    3.27    1.12
   2  -4  -4   18.33    2.70
   2  -4  -4    8.12    1.58
   2   4  -4   16.10    2.66
   2   4  -4   13.81    1.02
  -2  -4   3  278.45    7.77
  -2   4   3  154.12    5.45
   2  -4  -3  303.14    8.45
   2  -4  -3  163.81    3.97
   2   4  -3  330.13    8.81
  -2  -4   2  660.55   11.42
  -2   4   2  640.72   10.71
   2  -4  -2  766.35   12.36
   2   4  -2  910.50   13.57
   2   4  -2  931.49    9.10
  -2  -4   1  214.71    6.31
  -2  -4   1  167.61    5.57
  -2   4   1  219.33    6.21
   2  -4  -1  237.31    6.28
   2   4  -1  332.19    6.22
  -2  -4   0  110.83    4.47
  -2  -4   0   94.54    4.24
  -2   4   0   74.30    2.63
  -2   4   0  104.05    4.44
   2  -4   0  121.13    4.01
   2   4   0  162.95    5.06
  -2  -4  -1  198.33    5.98
  -2  -4  -1  187.52    6.20
  -2   4  -1  136.55    4.56
  -2   4  -1  226.68    6.87
   2  -4   1  212.45    4.53
   2   4   1  343.03    8.28
  -2  -4  -2   91.46    4.71
  -2   4  -2   67.21    3.86
  -2   4  -2  120.21    5.40
   2  -4   2   82.05    2.25
   2   4   2  201.95    7.12
  -2  -4  -3  195.40    6.36
  -2  -4  -3  249.99    8.40
  -2   4  -3  176.88    6.98
  -2   4  -3  329.02    9.42
   2   4   3  487.84   11.91
  -2  -4  -4   49.18    4.28
  -2  -4  -4   21.78    2.49
  -2  -4  -4   37.87    3.85
  -2   4  -4   46.67    4.11
  -2   4  -4   22.02    3.26
  -2   4  -4   47.57    4.15
   2   4   4   67.49    5.33
  -2  -4  -5    2.11    1.80
  -2  -4  -5   -0.53    0.85
  -2  -4  -5    1.92    1.79
  -2   4  -5    0.99    1.63
  -2   4  -5    0.43    1.64
  -2   4  -5    1.03    1.62
   2   4   5    2.95    2.46
  -2  -4  -6   38.88    4.47
  -2  -4  -6   14.38    2.38
  -2  -4  -6   35.37    4.76
  -2   4  -6   37.12    4.40
  -2   4  -6   20.13    4.11
  -2   4  -6   37.85    4.47
   2   4   6   57.68    5.83
  -2  -4  -7  305.72   12.49
  -2  -4  -7  202.10   10.48
  -2   4  -7  282.95   11.45
  -2   4  -7  152.03    9.57
  -2   4  -7  291.52   11.68
   2   4   7  459.25   15.41
  -2  -4  -8   50.96    5.94
  -2  -4  -8   34.36    5.50
  -2   4  -8   44.49    5.67
  -2   4  -8   20.92    4.87
  -2   4  -8   53.53    5.96
   2   4   8   77.30    7.78
  -2  -4  -9    1.00    2.69
  -2  -4  -9   -0.87    2.42
  -2   4  -9   -0.79    2.52
  -2   4  -9    1.20    3.38
  -2   4  -9    1.58    3.18
   2   4   9    1.68    4.25
  -2  -4 -10    5.65    3.66
  -2  -4 -10    5.45    3.71
  -2   4 -10    5.36    3.88
   2   4  10    9.29    5.69
  -2  -4 -11    1.36    3.14
  -2   4 -11    1.30    3.90
   2   5 -12    0.64    3.85
   2  -5 -11   12.77    4.64
   2   5 -11   10.03    4.62
   2  -5 -10   83.44    7.87
   2  -5 -10   89.11    8.01
   2  -5 -10   55.72    6.47
   2   5 -10   40.85    6.67
   2  -5  -9  122.25    8.52
   2  -5  -9  129.06    8.83
   2  -5  -9   89.90    7.12
   2   5  -9   56.02    6.58
  -2  -5   8   51.32    5.35
  -2  -5   8   40.57    4.57
  -2   5   8   53.45    5.06
  -2   5   8   55.62    5.16
   2  -5  -8   39.97    5.28
   2  -5  -8   42.77    5.35
   2  -5  -8   34.59    4.57
   2   5  -8   20.03    4.36
  -2  -5   7   99.70    6.31
  -2  -5   7   83.87    5.74
  -2   5   7  102.26    6.35
  -2   5   7   92.61    6.02
   2  -5  -7   88.24    6.59
   2  -5  -7   90.44    6.51
   2  -5  -7   55.52    4.79
   2   5  -7   44.72    5.08
  -2  -5   6  153.47    7.28
  -2  -5   6  152.45    7.05
  -2   5   6  111.11    6.11
  -2   5   6  102.17    5.80
   2  -5  -6  153.19    7.92
   2  -5  -6  154.29    7.76
   2  -5  -6   97.53    5.40
   2   5  -6  111.39    7.00
   2   5  -6  150.09    4.55
  -2  -5   5  480.11   11.57
   2  -5  -5  478.96   12.66
   2  -5  -5  487.82   12.76
   2  -5  -5  294.76    7.85
   2   5  -5  423.46   12.18
   2   5  -5  471.92    6.85
  -2  -5   4  167.62    6.61
  -2   5   4  145.21    6.02
   2  -5  -4  184.34    7.49
   2  -5  -4  119.07    4.25
   2   5  -4  194.71    7.70
   2   5  -4   64.81    2.30
  -2  -5   3    2.09    1.10
  -2   5   3    0.89    0.85
   2  -5  -3    1.92    1.21
   2  -5  -3    1.14    0.65
   2   5  -3    1.30    1.25
   2   5  -3    0.74    0.59
  -2  -5   2  841.66   13.52
  -2   5   2  700.75   12.07
   2  -5  -2  904.45   14.11
   2   5  -2 1016.20   15.11
   2   5  -2  945.43   10.21
  -2  -5   1   40.95    3.01
  -2  -5   1   38.62    2.92
  -2   5   1   42.81    3.04
   2  -5  -1   45.44    3.09
   2   5  -1   67.64    3.18
  -2  -5   0  115.80    4.93
  -2  -5   0  104.05    4.67
  -2   5   0   70.68    2.67
  -2   5   0  128.55    5.25
   2  -5   0  120.75    4.35
   2   5   0  194.37    5.93
  -2  -5  -1  454.53    9.76
  -2  -5  -1  454.75   10.04
  -2   5  -1  276.23    6.52
  -2   5  -1  542.73   11.09
   2  -5   1  463.43    7.52
   2   5   1  808.49   13.26
  -2  -5  -2  183.66    6.41
  -2  -5  -2  221.52    7.48
  -2   5  -2   40.17    3.02
  -2   5  -2  266.89    8.25
   2  -5   2  187.73    4.12
   2   5   2  421.00   10.51
  -2  -5  -3  423.35   11.41
  -2  -5  -3  315.24    9.65
  -2   5  -3  178.39    7.13
  -2   5  -3  363.07   10.16
   2  -5   3  402.98    5.21
   2   5   3  538.69   12.90
  -2  -5  -4    8.22    2.34
  -2  -5  -4    2.93    1.35
  -2  -5  -4    5.35    2.03
  -2   5  -4   13.46    2.70
  -2   5  -4    5.56    2.12
  -2   5  -4   11.07    2.46
   2   5   4   12.51    3.04
  -2  -5  -5  106.11    6.72
  -2  -5  -5   36.27    3.50
  -2  -5  -5   77.49    5.80
  -2   5  -5  101.15    6.21
  -2   5  -5   43.70    4.66
  -2   5  -5   91.96    6.06
   2   5   5  150.94    8.17
  -2  -5  -6   90.46    5.62
  -2  -5  -6  259.24   11.07
  -2  -5  -6   84.33    5.32
  -2  -5  -6  180.90    9.32
  -2   5  -6  213.21    9.53
  -2   5  -6  102.18    7.41
  -2   5  -6  236.44    9.99
   2   5   6  362.26   13.32
  -2  -5  -7  370.14   14.03
  -2  -5  -7  251.14   11.70
  -2   5  -7  352.24   12.87
  -2   5  -7  170.95   10.20
  -2   5  -7  374.90   13.29
   2   5   7  528.83   16.93
  -2  -5  -8    3.83    2.84
  -2  -5  -8    1.49    2.38
  -2   5  -8    1.67    2.54
  -2   5  -8    1.36    2.86
  -2   5  -8    3.97    2.90
   2   5   8    5.51    4.23
  -2  -5  -9   23.30    5.05
  -2  -5  -9   15.46    4.64
  -2   5  -9   20.83    4.58
  -2   5  -9    7.78    4.03
  -2   5  -9   19.43    4.72
   2   5   9   29.08    6.26
  -2  -5 -10   11.49    4.43
  -2   5 -10    8.48    4.51
   2   5  10   29.78    6.67
  -2  -5 -11   29.01    6.51
  -2   5 -11   23.49    6.35
   2   5  11   54.91    8.85
   2   5  11   47.79    8.63
   2   6 -12   -0.39    3.84
   2   6 -11    2.73    4.05
   2  -6 -10   22.12    5.30
   2  -6 -10   29.18    5.47
   2  -6 -10   21.87    4.77
   2   6 -10   12.65    4.70
  -2   6   9   32.25    5.12
   2  -6  -9   22.31    4.89
   2  -6  -9   30.89    5.20
   2  -6  -9   19.15    4.29
   2   6  -9   15.29    4.47
  -2  -6   8   30.76    4.44
  -2  -6   8   26.44    3.96
  -2   6   8   21.46    3.82
  -2   6   8   19.87    3.91
   2  -6  -8   25.77    4.64
   2  -6  -8   13.69    3.27
   2   6  -8   13.13    4.13
  -2  -6   7  167.78    8.03
  -2  -6   7  158.30    7.65
   2  -6  -7  175.82    9.14
   2  -6  -7  159.75    8.80
   2  -6  -7  103.59    6.13
   2   6  -7   85.70    6.88
  -2  -6   6  593.75   13.86
  -2  -6   6  563.85   13.47
  -2   6   6  452.82   12.41
  -2   6   6  505.44   13.09
   2  -6  -6  544.89   14.79
   2  -6  -6  539.66   14.66
   2  -6  -6  373.85   10.01
   2   6  -6  433.40   13.58
   2   6  -6  553.66    8.83
  -2  -6   5  260.99    8.88
  -2   6   5  243.91    8.65
  -2   6   5  229.16    8.44
   2  -6  -5  263.20    9.86
   2  -6  -5  250.63    9.55
   2  -6  -5  183.71    6.19
   2   6  -5  232.27    9.46
   2   6  -5  231.51    5.22
  -2  -6   4   81.02    4.89
  -2   6   4   74.87    4.67
   2  -6  -4   79.49    5.31
   2  -6  -4   73.08    5.01
   2  -6  -4   62.80    3.12
   2   6  -4   96.21    5.73
   2   6  -4   56.55    2.59
  -2  -6   3   23.05    2.76
  -2   6   3   24.39    2.65
   2  -6  -3   33.91    3.25
   2  -6  -3   18.82    1.39
   2   6  -3   34.71    3.40
   2   6  -3   32.18    2.05
  -2  -6   2  484.53   10.81
  -2   6   2  445.46   10.32
   2  -6  -2  485.38   10.88
   2   6  -2  626.00   12.43
   2   6  -2  571.30    8.73
  -2  -6   1   50.58    3.52
  -2  -6   1   42.51    3.27
  -2   6   1   46.26    3.46
   2  -6  -1   50.41    3.43
   2   6  -1   70.59    3.54
  -2  -6   0   42.56    3.31
  -2  -6   0   42.05    3.23
  -2   6   0   19.62    1.76
  -2   6   0   37.06    3.22
   2  -6   0   38.37    2.77
   2   6   0   65.73    3.84
  -2  -6  -1   61.09    3.92
  -2  -6  -1   66.51    4.12
  -2   6  -1   34.51    2.67
  -2   6  -1   75.71    4.47
   2  -6   1   59.21    3.10
   2   6   1  113.88    5.37
  -2  -6  -2  772.99   13.99
  -2  -6  -2  983.65   16.19
  -2   6  -2 1198.11   18.04
   2  -6   2  842.87   10.19
   2   6   2 1826.66   22.74
  -2  -6  -3   48.89    4.20
  -2  -6  -3   23.60    2.69
  -2  -6  -3   40.93    3.76
  -2   6  -3   50.55    4.23
  -2   6  -3   25.76    3.26
  -2   6  -3   50.41    4.18
   2  -6   3   42.19    2.12
   2   6   3   79.29    5.41
  -2  -6  -4  331.55   11.23
  -2  -6  -4  246.66    9.40
  -2   6  -4  298.69   10.02
  -2   6  -4  122.51    6.81
  -2   6  -4  287.31    9.90
   2  -6   4  339.04    5.00
   2   6   4  449.27   13.10
  -2  -6  -5   29.40    3.60
  -2  -6  -5   78.28    6.01
  -2  -6  -5   31.33    3.42
  -2  -6  -5   56.64    5.07
  -2   6  -5   64.96    5.19
  -2   6  -5   31.53    4.34
  -2   6  -5   66.20    5.33
   2   6   5  120.38    7.63
  -2  -6  -6  248.15    9.36
  -2  -6  -6  671.94   18.03
  -2  -6  -6  244.58    9.23
  -2  -6  -6  487.05   15.16
  -2   6  -6  645.74   16.50
  -2   6  -6  276.15   11.78
  -2   6  -6  664.57   16.69
   2   6   6  986.48   21.98
  -2  -6  -7   26.41    4.57
  -2  -6  -7   22.29    4.30
  -2   6  -7   31.10    4.77
  -2   6  -7    9.99    3.83
  -2   6  -7   25.55    4.48
   2   6   7   31.10    5.64
  -2  -6  -8   10.09    3.66
  -2   6  -8   16.38    4.05
  -2   6  -8   11.88    4.29
  -2   6  -8   13.52    3.87
   2   6   8   31.41    6.13
  -2  -6  -9   54.89    6.79
  -2   6  -9   65.94    7.04
  -2   6  -9   27.13    5.93
  -2   6  -9   69.33    7.19
   2   6   9   99.48    9.34
   2   6   9   96.87    9.42
  -2  -6 -10    1.49    3.34
  -2   6 -10    1.01    3.76
   2   6  10    2.90    4.50
   2   6  10    9.01    5.37
  -2  -6 -11    2.64    4.02
  -2   6 -11    3.58    4.60
   2   6  11   20.97    7.12
   2   6  11   17.47    7.17
   2   7 -12    1.06    4.74
   2   7 -11   10.39    5.01
   2  -7 -10   46.15    6.47
   2  -7 -10   51.76    6.74
   2   7 -10   19.95    5.12
  -2   7   9    2.89    2.08
  -2   7   9    4.31    2.57
   2  -7  -9   30.77    5.30
   2  -7  -9   30.52    5.09
   2  -7  -9   23.55    4.28
   2   7  -9   16.25    4.88
  -2  -7   8   20.25    3.81
  -2  -7   8   18.65    3.72
  -2   7   8   10.24    3.34
  -2   7   8   12.56    3.65
   2  -7  -8   18.05    4.15
   2  -7  -8   13.00    3.85
   2  -7  -8   11.50    3.13
   2   7  -8    5.80    3.32
  -2  -7   7   56.02    5.07
  -2  -7   7   52.40    5.00
  -2   7   7   59.22    5.42
  -2   7   7   59.03    5.40
   2  -7  -7   41.58    5.17
   2  -7  -7   39.67    4.96
   2  -7  -7   29.76    3.71
   2   7  -7   33.90    5.05
  -2  -7   6  106.32    6.32
  -2  -7   6   99.99    6.11
  -2   7   6   93.86    6.07
  -2   7   6   98.50    6.30
   2  -7  -6   97.51    6.71
   2  -7  -6   99.26    6.92
   2  -7  -6   70.23    4.54
   2   7  -6   79.14    6.47
  -2  -7   5  798.34   15.83
  -2  -7   5  806.10   15.84
  -2   7   5  840.31   16.71
  -2   7   5  792.18   16.30
   2  -7  -5  766.32   17.06
   2  -7  -5  787.75   17.27
   2  -7  -5  627.52   11.12
   2   7  -5  882.47   18.53
  -2  -7   4   39.29    3.75
  -2   7   4   32.87    3.53
  -2   7   4   27.10    3.28
   2  -7  -4   39.28    4.16
   2  -7  -4   41.03    4.01
   2  -7  -4   31.63    2.32
   2   7  -4   38.77    3.97
   2   7  -4   20.18    1.92
  -2  -7   3  236.81    8.16
  -2   7   3  194.62    7.52
   2  -7  -3  221.76    8.34
   2  -7  -3  203.69    7.92
   2  -7  -3  202.25    4.10
   2   7  -3  307.67    9.69
  -2  -7   2  121.98    5.79
  -2   7   2  117.48    5.71
   2  -7  -2  113.68    5.61
   2   7  -2  176.47    7.00
   2   7  -2  153.75    5.06
  -2  -7   1  245.14    8.05
  -2  -7   1  222.72    7.53
  -2   7   1  132.83    2.89
  -2   7   1  218.57    7.60
   2  -7  -1  228.91    7.40
   2   7  -1  342.41    8.16
  -2  -7   0    3.85    1.37
  -2  -7   0    4.69    1.61
  -2   7   0    0.55    0.86
  -2   7   0    3.64    1.55
   2  -7   0    3.31    1.24
   2   7   0    3.20    1.49
  -2  -7  -1    4.70    1.56
  -2  -7  -1    7.22    1.87
  -2   7  -1    1.30    1.15
  -2   7  -1    3.00    1.42
   2  -7   1    5.57    1.36
   2   7   1    4.77    1.87
  -2  -7  -2   72.24    4.65
  -2  -7  -2   89.51    5.14
  -2   7  -2  112.42    5.95
  -2   7  -2   46.48    3.62
  -2   7  -2  108.95    5.83
   2  -7   2   82.53    3.62
   2   7   2  168.81    7.42
   2   7   2  170.67    7.51
  -2  -7  -3  945.12   16.92
  -2  -7  -3  943.80   16.87
  -2  -7  -3 1459.61   21.58
  -2   7  -3 1811.35   24.05
  -2   7  -3  723.80   14.53
  -2   7  -3 1760.73   23.69
   2  -7   3 1658.52   14.90
   2   7   3 2672.59   30.58
   2   7   3 2759.07   31.12
  -2  -7  -4  154.65    7.26
  -2  -7  -4  151.92    7.11
  -2  -7  -4  250.39    9.61
  -2   7  -4  315.07   10.62
  -2   7  -4  126.54    7.03
  -2   7  -4  296.07   10.29
   2  -7   4  325.79    5.91
   2   7   4  474.85   13.70
   2   7   4  496.02   14.25
  -2  -7  -5   -0.54    0.88
  -2  -7  -5    2.49    1.23
  -2  -7  -5   17.46    3.36
  -2   7  -5   28.05    3.99
  -2   7  -5   11.88    3.26
  -2   7  -5   22.27    3.58
   2   7   5   33.04    4.86
   2   7   5   37.97    5.27
  -2  -7  -6   40.03    4.30
  -2  -7  -6   35.15    3.92
  -2  -7  -6   76.34    6.30
  -2   7  -6  106.08    7.13
  -2   7  -6   52.79    5.85
  -2   7  -6  101.12    7.03
   2   7   6  156.73    9.42
   2   7   6  175.86   10.13
  -2  -7  -7   94.73    6.54
  -2  -7  -7  200.51   10.65
  -2   7  -7  256.24   11.19
  -2   7  -7  121.62    9.03
  -2   7  -7  256.38   11.33
   2   7   7  428.42   15.82
   2   7   7  407.00   15.58
  -2  -7  -8   85.32    7.74
  -2   7  -8  124.04    8.54
  -2   7  -8   49.60    6.72
  -2   7  -8  122.05    8.53
   2   7   8  196.71   11.74
   2   7   8  199.44   12.00
  -2  -7  -9   -0.01    2.32
  -2   7  -9    1.48    2.84
  -2   7  -9    2.66    3.48
  -2   7  -9   -1.18    2.97
   2   7   9    2.14    3.66
   2   7   9    2.87    4.51
  -2  -7 -10    3.71    3.64
  -2   7 -10    5.58    4.74
   2   7  10   14.49    6.00
   2   7  10   10.56    5.65
  -2  -7 -11   68.22    8.49
  -2   7 -11   42.72    8.03
   2   7  11  149.03   12.19
   2   7  11  145.30   12.87
   2   7  12    2.24    6.44
   2   8 -12    1.75    4.71
   2  -8 -11    5.06    4.44
   2   8 -11    2.93    3.78
   2  -8 -10   44.23    6.47
   2  -8 -10   37.11    6.18
   2   8 -10   19.38    5.47
  -2   8   9  103.98    8.00
  -2   8   9   97.00    8.22
   2  -8  -9   84.04    8.01
   2  -8  -9   81.97    7.82
  -2  -8   8   49.32    5.33
  -2   8   8   43.44    5.67
  -2   8   8   54.16    5.95
   2  -8  -8   38.82    5.53
   2  -8  -8   49.42    6.12
   2  -8  -8   33.06    4.39
   2   8  -8   26.40    5.21
  -2  -8   7   15.65    3.53
  -2  -8   7   18.62    3.36
  -2   8   7   22.12    3.84
  -2   8   7   11.87    3.33
   2  -8  -7   13.62    3.72
   2  -8  -7   17.95    3.90
   2  -8  -7    8.61    2.39
   2   8  -7   11.29    3.78
  -2  -8   6   60.72    5.07
  -2  -8   6   61.68    5.14
  -2   8   6   67.31    5.34
  -2   8   6   59.89    5.29
   2  -8  -6   48.43    5.30
   2  -8  -6   59.51    5.60
   2  -8  -6   44.60    3.66
   2   8  -6   56.59    5.78
  -2  -8   5   85.97    5.67
  -2  -8   5   87.06    5.66
  -2   8   5   77.43    5.48
  -2   8   5   70.58    5.26
   2  -8  -5   79.16    5.97
   2  -8  -5   87.65    6.24
   2  -8  -5   72.53    3.97
   2   8  -5   75.44    5.97
   2   8  -5   57.17    3.31
  -2  -8   4   66.06    4.95
  -2  -8   4   53.03    4.35
  -2   8   4   52.82    4.49
  -2   8   4   60.40    4.80
   2  -8  -4   52.30    4.79
   2  -8  -4   52.07    4.63
   2  -8  -4   48.93    2.79
   2   8  -4   74.83    5.51
   2   8  -4   48.24    3.06
  -2  -8   3   24.02    3.23
  -2  -8   3   23.52    2.93
  -2   8   3   26.49    3.41
  -2   8   3   29.08    3.25
   2  -8  -3   22.73    3.22
   2  -8  -3   22.11    3.13
   2  -8  -3   22.87    1.61
   2   8  -3   37.48    3.87
   2   8  -3   29.99    2.56
  -2  -8   2  149.70    6.72
  -2  -8   2  143.39    6.53
  -2   8   2  113.53    6.01
  -2   8   2  157.66    3.03
  -2   8   2  106.33    5.76
   2  -8  -2  136.85    6.57
   2  -8  -2  133.98    6.38
   2   8  -2  178.92    7.36
   2   8  -2  153.41    5.53
  -2  -8   1  269.92    8.97
  -2  -8   1  280.51    9.07
  -2  -8   1  261.53    8.54
  -2   8   1  303.31    9.19
  -2   8   1  228.30    4.29
  -2   8   1  285.96    9.19
   2  -8  -1  258.65    8.34
   2   8  -1  425.37    9.75
  -2  -8   0  165.14    7.08
  -2  -8   0  169.02    7.14
  -2  -8   0  182.48    7.09
  -2   8   0  196.90    7.70
  -2   8   0  109.46    3.88
  -2   8   0  195.40    7.62
   2  -8   0  163.28    6.28
   2   8   0  301.86    8.85
  -2  -8  -1    6.07    1.93
  -2  -8  -1    3.39    1.51
  -2  -8  -1    6.32    1.90
  -2   8  -1   12.11    2.49
  -2   8  -1    3.86    1.46
  -2   8  -1    8.09    2.13
   2  -8   1    5.07    1.36
   2   8   1   14.21    2.84
   2   8   1   15.34    2.77
  -2  -8  -2  323.91   10.22
  -2  -8  -2  305.40    9.88
  -2  -8  -2  434.81   11.49
  -2   8  -2  509.49   12.77
  -2   8  -2  216.18    7.35
  -2   8  -2  530.69   13.03
   2  -8   2  378.94    8.31
   2   8   2  779.92   16.12
   2   8   2  806.92   16.43
  -2  -8  -3   70.98    5.12
  -2  -8  -3   64.67    4.78
  -2  -8  -3  100.42    5.94
  -2   8  -3  116.90    6.45
  -2   8  -3   45.40    4.14
  -2   8  -3  115.67    6.51
   2  -8   3  110.85    4.34
   2   8   3  175.08    8.34
   2   8   3  178.09    8.42
  -2  -8  -4  171.70    7.97
  -2  -8  -4  160.14    7.64
  -2  -8  -4  265.51   10.07
  -2   8  -4  319.00   11.02
  -2   8  -4  127.87    7.12
  -2   8  -4  305.56   10.73
   2  -8   4  334.43    6.87
   2   8   4  510.62   14.33
   2   8   4  500.98   14.78
  -2  -8  -5   42.00    4.34
  -2  -8  -5   37.91    4.03
  -2  -8  -5   74.14    5.88
  -2   8  -5   87.31    6.33
  -2   8  -5   42.22    4.97
  -2   8  -5   91.77    6.38
   2   8   5  148.20    8.68
   2   8   5  145.27    8.76
  -2  -8  -6  190.52    9.76
  -2   8  -6  222.66   10.13
  -2   8  -6   86.20    7.22
  -2   8  -6  241.18   10.62
   2   8   6  331.30   13.58
   2   8   6  361.97   14.23
  -2  -8  -7    5.96    2.55
  -2  -8  -7    2.86    2.21
  -2  -8  -7   11.55    3.69
  -2   8  -7    7.74    3.33
  -2   8  -7    2.82    3.40
  -2   8  -7   17.89    4.15
   2   8   7   11.05    4.23
   2   8   7   20.92    5.10
  -2  -8  -8   21.97    4.84
  -2   8  -8   31.83    5.21
  -2   8  -8   13.01    4.49
  -2   8  -8   29.15    5.06
   2   8   8   40.38    6.57
   2   8   8   40.95    6.98
  -2  -8  -9   43.04    6.54
  -2   8  -9   18.30    5.53
   2   8   9   77.50    8.45
   2   8   9   74.50    8.94
  -2  -8 -10   22.13    5.61
  -2   8 -10   11.66    5.34
   2   8  10   45.71    8.36
   2   8  10   44.40    8.44
  -2  -8 -11    5.18    4.50
  -2   8 -11    5.01    5.37
   2   8  11   13.34    7.02
   2   8  11   12.25    7.26
   2   8  12   45.29    9.67
   2  -9 -11    3.23    4.07
   2  -9 -11   10.22    4.69
   2   9 -11    0.07    3.72
   2  -9 -10  115.60    9.77
   2  -9 -10  115.44    9.67
   2   9 -10   54.28    7.68
  -2   9   9  135.38    9.15
  -2   9   9  124.17    9.11
   2  -9  -9   89.09    8.19
   2  -9  -9   95.88    8.51
  -2   9   8   17.11    4.24
  -2   9   8   11.94    4.06
   2  -9  -8   10.52    3.63
   2  -9  -8   13.04    4.08
   2   9  -8    8.37    3.98
  -2  -9   7   24.39    4.01
  -2  -9   7   20.96    3.79
  -2   9   7   23.69    4.20
  -2   9   7   23.19    4.39
   2  -9  -7   15.28    3.88
   2  -9  -7   16.70    3.91
   2   9  -7   16.66    4.38
  -2  -9   6  102.47    6.60
  -2  -9   6  107.24    6.67
  -2   9   6  109.63    7.08
  -2   9   6  103.98    7.11
   2  -9  -6   91.40    7.09
   2  -9  -6   88.41    6.99
   2  -9  -6   80.20    4.80
   2   9  -6   87.39    7.10
  -2  -9   5   19.08    3.28
  -2  -9   5   18.82    3.17
  -2   9   5    6.58    2.43
  -2   9   5    6.54    2.59
   2  -9  -5   15.85    3.32
   2  -9  -5   16.83    3.45
   2  -9  -5   14.46    2.13
   2   9  -5   10.03    3.18
   2   9  -5    4.02    1.45
  -2  -9   4  114.47    6.47
  -2  -9   4  116.74    6.43
  -2   9   4  104.87    6.34
  -2   9   4  105.40    6.40
   2  -9  -4  106.60    6.66
   2  -9  -4  100.11    6.46
   2  -9  -4   98.31    3.82
   2   9  -4  148.30    7.77
   2   9  -4  106.13    4.71
  -2  -9   3   11.51    2.60
  -2  -9   3    8.48    2.17
  -2   9   3   14.04    2.83
  -2   9   3   10.24    2.56
   2  -9  -3    7.93    2.31
   2  -9  -3    9.33    2.37
   2  -9  -3   10.78    1.27
   2   9  -3   14.04    2.95
   2   9  -3   10.51    1.90
  -2  -9   2  226.98    8.65
  -2  -9   2  224.95    8.55
  -2   9   2  230.62    8.95
  -2   9   2  323.53    5.02
  -2   9   2  217.82    8.63
   2  -9  -2  204.92    8.33
   2  -9  -2  209.78    8.35
   2   9  -2  348.49   10.64
   2   9  -2  278.58    7.97
  -2  -9   1  492.89   12.68
  -2  -9   1  489.11   12.54
  -2  -9   1  491.68   12.22
  -2   9   1  532.58   13.19
  -2   9   1  477.58    6.94
  -2   9   1  499.07   12.75
   2  -9  -1  464.40   11.79
   2  -9  -1  472.56   11.83
   2   9  -1  747.72   13.74
  -2  -9   0  321.86   10.37
  -2  -9   0  311.80   10.12
  -2  -9   0  352.05   10.25
  -2   9   0  391.69   11.39
  -2   9   0  219.81    5.74
  -2   9   0  373.15   11.06
   2  -9   0  326.90    9.36
   2   9   0  549.53   12.55
  -2  -9  -1    3.32    1.76
  -2  -9  -1    1.57    1.22
  -2  -9  -1    3.20    1.66
  -2   9  -1    1.73    1.45
  -2   9  -1    2.45    1.44
  -2   9  -1    3.22    1.75
   2  -9   1    1.92    1.22
   2   9   1    3.60    2.04
   2   9   1    4.37    2.11
  -2  -9  -2   26.22    3.37
  -2  -9  -2   22.56    3.27
  -2  -9  -2   33.74    3.60
  -2   9  -2   34.12    3.71
  -2   9  -2   17.12    2.69
  -2   9  -2   34.61    3.89
   2  -9   2   25.35    2.58
   2   9   2   50.69    4.70
   2   9   2   53.93    5.00
  -2  -9  -3  183.56    8.31
  -2  -9  -3  186.63    8.35
  -2  -9  -3  293.09   10.19
  -2   9  -3  334.66   11.18
  -2   9  -3  317.71   10.83
   2  -9   3  293.34    7.55
   2   9   3  519.67   14.54
   2   9   3  548.84   14.99
  -2  -9  -4  131.75    7.32
  -2  -9  -4  124.59    7.05
  -2  -9  -4  212.68    9.24
  -2   9  -4  252.11   10.13
  -2   9  -4   99.57    6.62
  -2   9  -4  259.37   10.23
   2   9   4  423.37   13.66
   2   9   4  422.88   13.95
  -2  -9  -5    1.96    1.85
  -2  -9  -5    0.57    1.53
  -2  -9  -5    1.71    1.94
  -2   9  -5    1.99    2.23
  -2   9  -5   -2.41    2.11
  -2   9  -5    4.85    2.59
   2   9   5    4.72    2.97
   2   9   5    3.29    3.18
  -2  -9  -6    1.38    1.83
  -2  -9  -6   -0.62    1.33
  -2  -9  -6   -1.08    1.73
  -2   9  -6    0.48    1.94
  -2   9  -6    0.44    2.70
  -2   9  -6    1.27    2.54
   2   9   6    3.21    3.26
   2   9   6    3.91    3.66
  -2  -9  -7    0.19    1.48
  -2  -9  -7   -0.40    1.38
  -2  -9  -7   13.58    3.80
  -2   9  -7   12.00    3.51
  -2   9  -7    4.53    3.54
  -2   9  -7   13.76    3.80
   2   9   7   25.44    5.71
   2   9   7   25.70    5.95
  -2  -9  -8   16.07    4.37
  -2   9  -8   20.97    4.75
  -2   9  -8    7.02    4.24
  -2   9  -8   19.39    4.64
   2   9   8   40.26    6.91
   2   9   8   26.02    6.47
  -2  -9  -9    0.70    2.79
  -2   9  -9   -0.62    3.36
   2   9   9   -1.13    3.83
   2   9   9   -0.46    4.38
  -2  -9 -10   -1.36    2.85
  -2   9 -10   -0.84    3.37
   2   9  10    0.84    5.28
   2   9  10    0.05    5.51
  -2  -9 -11   16.89    5.96
   2   9  11   41.31    9.01
   2   9  11   26.93    8.62
   2   9  12    1.21    6.33
   2 -10 -11   13.63    5.45
   2 -10 -11   14.06    5.11
   2  10 -11    2.49    4.77
   2 -10 -10    8.19    4.47
   2 -10 -10    9.55    4.47
   2  10 -10    5.47    4.52
  -2  10   9   88.79    7.87
  -2  10   9   72.51    7.65
   2 -10  -9   61.27    7.33
   2 -10  -9   57.51    7.08
   2  10  -9   26.73    6.03
  -2  10   8   99.53    7.83
  -2  10   8   81.30    7.47
   2 -10  -8   55.22    6.64
   2 -10  -8   51.02    6.51
   2  10  -8   30.80    5.75
  -2 -10   7   81.35    6.37
  -2 -10   7   92.85    6.68
  -2  10   7   75.04    6.66
  -2  10   7   75.59    6.81
   2 -10  -7   79.12    7.29
   2 -10  -7   69.47    6.95
   2  10  -7   54.06    6.30
  -2 -10   6   70.35    5.83
  -2 -10   6   63.71    5.55
  -2  10   6   80.08    6.35
  -2  10   6   74.92    6.35
   2 -10  -6   57.42    6.04
   2 -10  -6   63.33    6.32
   2  10  -6   72.57    6.63
  -2 -10   5  225.45    9.40
  -2 -10   5  243.21    9.73
  -2  10   5  253.96   10.59
  -2  10   5  249.67   10.68
   2 -10  -5  205.65    9.98
   2 -10  -5  205.15   10.03
   2  10  -5  272.79   11.43
   2  10  -5  225.88    7.23
  -2 -10   4   19.11    3.33
  -2 -10   4   16.28    3.00
  -2  10   4   10.77    2.81
  -2  10   4    7.88    2.56
   2 -10  -4   13.19    3.18
   2 -10  -4   10.95    2.76
   2 -10  -4   14.21    1.79
   2  10  -4   11.32    3.27
   2  10  -4    8.49    1.98
  -2 -10   3   12.56    2.72
  -2 -10   3   13.60    2.78
  -2  10   3   11.28    2.91
  -2  10   3   12.38    2.84
   2 -10  -3   12.45    2.90
   2 -10  -3    8.46    2.46
   2 -10  -3   12.51    1.51
   2  10  -3   13.14    3.14
   2  10  -3   10.42    2.08
  -2 -10   2    9.23    2.41
  -2 -10   2    5.95    1.99
  -2  10   2    9.44    2.49
  -2  10   2   11.86    1.41
  -2  10   2    7.78    2.40
   2 -10  -2    5.21    2.15
   2 -10  -2    8.82    2.39
   2  10  -2   12.22    2.85
   2  10  -2   11.46    2.29
  -2 -10   1  338.08   11.03
  -2 -10   1  318.39   10.64
  -2 -10   1  346.58   10.70
  -2  10   1  347.61   11.16
  -2  10   1  333.42    6.34
  -2  10   1  317.97   10.78
   2 -10  -1  303.08   10.06
   2 -10  -1  319.72   10.23
   2  10  -1  459.27   11.48
  -2 -10   0  336.62   11.07
  -2 -10   0  327.72   10.88
  -2 -10   0  389.67   11.18
  -2  10   0  399.31   12.01
  -2  10   0  271.23    6.68
  -2  10   0  393.57   11.87
   2 -10   0  345.23   10.26
   2 -10   0  332.16    9.97
   2  10   0  621.98   14.13
   2  10   0  614.96   13.97
  -2 -10  -1    6.97    2.13
  -2 -10  -1    8.13    2.32
  -2 -10  -1    8.80    2.25
  -2  10  -1   12.99    2.80
  -2  10  -1    5.26    1.74
  -2  10  -1   12.99    2.82
   2 -10   1    9.80    2.10
   2  10   1   16.69    3.24
   2  10   1   19.99    3.44
  -2 -10  -2   28.25    3.75
  -2 -10  -2   26.03    3.55
  -2 -10  -2   38.19    3.96
  -2  10  -2   43.06    4.29
  -2  10  -2   22.74    3.16
  -2  10  -2   49.32    4.61
   2 -10   2   33.29    3.11
   2  10   2   71.30    5.67
   2  10   2   60.72    5.27
  -2 -10  -3   40.50    4.32
  -2 -10  -3   45.04    4.47
  -2 -10  -3   65.27    5.16
  -2  10  -3   77.16    5.84
  -2  10  -3   79.03    5.77
   2 -10   3   65.95    4.05
   2  10   3  123.23    7.60
   2  10   3  126.42    7.83
  -2 -10  -4    9.54    2.65
  -2 -10  -4    8.42    2.55
  -2 -10  -4    9.13    2.66
  -2  10  -4   10.67    3.05
  -2  10  -4    8.85    2.96
  -2  10  -4   14.75    3.40
   2  10   4   25.43    4.48
   2  10   4   25.10    4.81
  -2 -10  -5    7.10    2.54
  -2 -10  -5    6.44    2.45
  -2 -10  -5   11.75    3.16
  -2  10  -5   15.44    3.54
  -2  10  -5    5.90    3.13
  -2  10  -5   13.65    3.51
   2  10   5   25.44    4.81
   2  10   5   27.52    5.13
  -2 -10  -6  118.85    7.86
  -2 -10  -6  110.01    7.60
  -2 -10  -6  216.67   10.67
  -2  10  -6  263.89   11.53
  -2  10  -6  102.54    8.07
  -2  10  -6  269.38   11.66
   2  10   6  398.26   15.59
   2  10   6  425.09   16.19
  -2 -10  -7   20.89    3.94
  -2 -10  -7   18.21    3.89
  -2 -10  -7   36.15    5.38
  -2  10  -7   45.39    5.52
  -2  10  -7   14.31    4.73
  -2  10  -7   42.15    5.76
   2  10   7   76.41    7.83
   2  10   7   70.78    8.11
  -2 -10  -8   11.97    4.15
  -2  10  -8   16.89    4.48
  -2  10  -8    4.71    3.99
  -2  10  -8   23.23    5.06
   2  10   8   26.39    6.22
   2  10   8   25.77    6.35
  -2 -10  -9    1.82    3.12
  -2  10  -9    1.58    3.56
   2  10   9   -2.37    3.91
   2  10   9   -2.72    4.78
  -2 -10 -10    5.06    4.04
  -2  10 -10    5.28    4.87
   2  10  10    7.80    6.23
   2  10  10    6.94    6.08
  -2 -10 -11   10.61    5.71
   2  10  11   13.76    7.24
   2  10  11    6.79    7.45
   2 -11 -11   11.72    5.32
   2 -11 -11   11.56    5.13
   2  11 -11   10.49    5.41
  -2  11  10   62.80    7.49
  -2  11  10   62.62    8.15
   2 -11 -10   34.75    6.47
   2 -11 -10   40.40    6.82
   2  11 -10   24.36    6.28
  -2  11   9    3.62    3.92
  -2  11   9    7.24    4.37
   2 -11  -9    2.51    3.50
   2 -11  -9    2.73    3.48
   2  11  -9    4.12    3.72
  -2  11   8    2.12    3.09
  -2  11   8    2.56    3.22
   2 -11  -8    3.83    3.25
   2 -11  -8    5.12    3.50
   2  11  -8    5.25    3.72
  -2 -11   7   22.64    4.27
  -2 -11   7   24.00    4.04
  -2  11   7   26.29    4.71
  -2  11   7   30.27    5.33
   2 -11  -7   16.20    4.28
   2 -11  -7   17.59    4.25
   2  11  -7   16.93    4.55
  -2 -11   6  379.72   12.81
  -2 -11   6  362.71   12.50
  -2  11   6  345.24   13.29
  -2  11   6  363.50   13.83
   2 -11  -6  313.66   13.11
   2 -11  -6  318.55   13.26
   2  11  -6  317.23   13.30
  -2 -11   5   18.54    3.51
  -2 -11   5   19.85    3.55
  -2  11   5   17.53    3.64
  -2  11   5   18.95    3.99
   2 -11  -5   16.55    3.72
   2 -11  -5   13.55    3.57
   2  11  -5   20.56    4.08
  -2 -11   4    3.10    2.10
  -2 -11   4    2.07    1.78
  -2  11   4    3.49    2.15
  -2  11   4    2.78    2.13
   2 -11  -4    5.15    2.55
   2 -11  -4    3.11    2.12
   2  11  -4    3.60    2.68
   2  11  -4    4.01    1.77
  -2 -11   3  163.59    8.14
  -2 -11   3  157.51    7.95
  -2  11   3  153.04    8.19
  -2  11   3  150.75    8.17
   2 -11  -3  139.09    7.83
   2 -11  -3  144.59    7.99
   2  11  -3  219.82    9.52
  -2 -11   2   37.42    4.15
  -2 -11   2   37.40    4.02
  -2  11   2   56.20    4.22
  -2  11   2   40.91    4.39
   2 -11  -2   36.80    4.10
   2 -11  -2   31.75    3.85
   2  11  -2   49.71    4.25
   2  11  -2   60.86    5.08
   2  11  -2   52.30    4.15
  -2 -11   1   26.22    3.69
  -2 -11   1   19.17    3.28
  -2 -11   1   23.90    3.37
  -2  11   1   23.26    3.63
  -2  11   1   27.01    2.33
  -2  11   1   25.10    3.79
   2 -11  -1   22.27    3.37
   2 -11  -1   17.74    2.99
   2  11  -1   34.97    3.95
   2  11  -1   35.91    3.79
  -2 -11   0   53.56    4.85
  -2 -11   0   57.48    5.00
  -2 -11   0   65.65    5.00
  -2  11   0   74.98    5.67
  -2  11   0   51.73    3.36
  -2  11   0   71.93    5.60
   2 -11   0   56.23    4.67
   2 -11   0   62.81    4.72
   2  11   0  102.78    6.34
   2  11   0  102.57    6.31
  -2 -11  -1   57.87    5.13
  -2 -11  -1   58.03    5.07
  -2 -11  -1   84.60    5.58
  -2  11  -1   85.29    6.14
  -2  11  -1   40.07    3.48
  -2  11  -1   73.05    5.62
   2 -11   1   65.05    4.79
   2 -11   1   67.14    4.69
   2  11   1  118.69    7.09
   2  11   1  126.20    7.18
  -2 -11  -2   39.79    4.34
  -2 -11  -2   38.10    4.34
  -2 -11  -2   64.41    5.15
  -2  11  -2   62.95    5.27
  -2  11  -2   26.45    3.36
  -2  11  -2   63.34    5.32
   2 -11   2   55.63    4.14
   2  11   2   91.83    6.60
   2  11   2   92.92    6.73
  -2 -11  -3    7.76    2.48
  -2 -11  -3    6.19    2.46
  -2 -11  -3   13.21    3.02
  -2  11  -3   22.01    3.87
  -2  11  -3    7.81    2.70
  -2  11  -3   21.20    3.83
   2 -11   3   12.83    2.25
   2  11   3   32.15    5.01
   2  11   3   28.65    4.59
  -2 -11  -4    2.27    1.70
  -2 -11  -4   -0.09    1.53
  -2 -11  -4   -0.87    1.47
  -2  11  -4    0.65    1.69
  -2  11  -4    1.37    2.43
  -2  11  -4    2.71    2.34
   2  11   4    2.90    2.71
   2  11   4    1.36    2.55
  -2 -11  -5   61.31    5.79
  -2 -11  -5   53.93    5.39
  -2 -11  -5   98.14    7.12
  -2  11  -5  124.56    8.01
  -2  11  -5   39.68    5.47
  -2  11  -5   87.29    6.84
   2  11   5  197.95   10.42
   2  11   5  173.71   10.32
  -2 -11  -6    4.52    2.51
  -2 -11  -6    3.19    2.28
  -2 -11  -6    3.56    2.69
  -2  11  -6   16.42    3.76
  -2  11  -6    5.94    3.52
  -2  11  -6   14.39    3.94
   2  11   6   17.30    4.97
   2  11   6   25.53    5.64
  -2 -11  -7   22.78    4.26
  -2 -11  -7   15.71    3.77
  -2 -11  -7   37.01    5.58
  -2  11  -7   43.02    5.70
  -2  11  -7   14.39    4.75
  -2  11  -7   41.23    5.77
   2  11   7   75.24    8.29
   2  11   7   66.75    8.31
  -2 -11  -8   -1.01    2.52
  -2  11  -8    1.19    3.60
   2  11   8    0.85    3.68
   2  11   8    1.25    4.59
  -2 -11  -9    1.01    3.11
  -2  11  -9    0.35    3.88
   2  11   9    2.50    5.01
   2  11   9    0.86    4.97
  -2 -11 -10   30.88    6.59
  -2  11 -10   16.40    6.42
   2  11  10   62.59    9.82
   2  11  10   59.31    9.98
   2  11  11   34.03    8.71
   2 -12 -11   45.22    7.57
   2  12 -11   21.36    6.81
  -2  12  10   23.35    5.76
  -2  12  10   23.42    6.29
   2 -12 -10   18.85    5.48
   2 -12 -10   10.25    5.01
   2  12 -10   10.99    5.14
  -2  12   9    3.83    3.64
  -2  12   9    3.92    4.22
   2 -12  -9   -0.13    3.17
   2 -12  -9   -0.08    3.19
   2  12  -9    3.12    3.98
  -2  12   8   29.05    5.34
  -2  12   8   26.80    5.65
   2 -12  -8   21.90    5.04
   2 -12  -8   30.66    5.67
   2  12  -8   14.70    4.84
  -2 -12   7   78.07    6.95
  -2 -12   7   84.70    6.81
  -2  12   7   73.26    6.87
  -2  12   7   86.74    7.62
   2 -12  -7   64.53    7.01
   2 -12  -7   65.41    6.90
   2  12  -7   56.64    6.67
  -2 -12   6   32.92    4.73
  -2 -12   6   37.78    4.87
  -2  12   6   51.91    5.88
  -2  12   6   53.37    6.21
   2 -12  -6   35.67    5.29
   2 -12  -6   35.15    5.37
   2  12  -6   45.60    6.26
  -2 -12   5   46.50    5.08
  -2 -12   5   37.82    4.63
  -2  12   5   39.38    4.85
  -2  12   5   42.35    5.19
   2 -12  -5   37.50    5.19
   2 -12  -5   37.26    5.10
   2  12  -5   45.40    5.42
  -2 -12   4   35.40    4.56
  -2 -12   4   34.32    4.27
  -2  12   4   42.60    5.33
  -2  12   4   39.67    4.87
   2 -12  -4   30.15    4.65
   2 -12  -4   26.24    4.35
   2  12  -4   37.63    4.10
   2  12  -4   48.20    5.47
   2  12  -4   33.65    3.57
  -2 -12   3  161.48    8.46
  -2 -12   3  142.79    7.85
  -2  12   3  152.36    8.51
  -2  12   3  166.39    8.95
   2 -12  -3  129.33    7.93
   2 -12  -3  122.56    7.67
   2  12  -3  179.49    7.81
   2  12  -3  225.47   10.02
  -2 -12   2  292.65   11.15
  -2 -12   2  275.53   10.78
  -2  12   2  297.47   11.09
  -2  12   2  269.13   11.04
   2 -12  -2  244.78   10.35
   2 -12  -2  254.93   10.52
   2  12  -2  342.42   10.74
   2  12  -2  414.03   12.90
   2  12  -2  328.63   10.39
  -2 -12   1   29.19    4.11
  -2 -12   1   28.85    4.00
  -2  12   1   31.32    4.27
  -2  12   1   34.98    4.30
   2 -12  -1   21.48    3.53
   2 -12  -1   28.92    3.90
   2  12  -1   51.21    4.68
   2  12  -1   53.10    4.74
  -2 -12   0    6.60    2.41
  -2 -12   0    7.80    2.56
  -2 -12   0    7.58    2.43
  -2  12   0    7.14    2.52
  -2  12   0    4.56    1.63
  -2  12   0   13.09    3.19
   2 -12   0    4.96    2.15
   2 -12   0    6.97    2.20
   2  12   0   11.10    2.94
   2  12   0   12.63    3.15
  -2 -12  -1   11.41    2.87
  -2 -12  -1   13.19    3.19
  -2 -12  -1   19.92    3.30
  -2  12  -1   20.26    3.62
  -2  12  -1    8.38    2.14
  -2  12  -1   22.54    3.83
   2 -12   1    8.28    2.27
   2 -12   1   12.91    2.64
   2  12   1   26.32    4.35
   2  12   1   25.87    4.06
  -2 -12  -2  207.49    9.87
  -2 -12  -2  212.98   10.00
  -2 -12  -2  339.34   11.58
  -2  12  -2  345.64   12.38
  -2  12  -2  153.90    7.19
  -2  12  -2  309.21   11.67
   2 -12   2  275.11    9.54
   2 -12   2  269.80    9.32
   2  12   2  477.30   14.78
   2  12   2  498.66   15.18
  -2 -12  -3   28.98    4.28
  -2 -12  -3   25.97    4.07
  -2 -12  -3   44.67    4.70
  -2  12  -3   38.64    4.74
  -2  12  -3   25.78    3.97
  -2  12  -3   47.01    5.01
   2 -12   3   43.98    3.91
   2  12   3   73.60    6.79
   2  12   3   74.98    6.80
  -2 -12  -4    2.33    1.81
  -2 -12  -4    1.39    1.77
  -2 -12  -4    3.85    2.17
  -2  12  -4    5.33    2.68
  -2  12  -4    0.31    2.32
  -2  12  -4    1.96    2.20
   2  12   4    6.41    3.62
   2  12   4    7.89    3.81
  -2 -12  -5   73.29    6.54
  -2 -12  -5   69.70    6.33
  -2 -12  -5  118.66    7.92
  -2  12  -5  132.90    8.54
  -2  12  -5   45.43    5.96
  -2  12  -5  130.85    8.50
   2  12   5  253.92   11.41
   2  12   5  213.47   11.91
  -2 -12  -6   41.44    5.41
  -2 -12  -6   38.25    5.30
  -2 -12  -6   80.65    7.02
  -2  12  -6   78.00    6.99
  -2  12  -6   28.71    5.36
  -2  12  -6   83.42    7.23
   2  12   6  131.16    9.88
   2  12   6  130.81   10.15
  -2 -12  -7    2.28    2.31
  -2 -12  -7    1.32    2.25
  -2 -12  -7    2.05    2.77
  -2  12  -7    5.88    3.25
  -2  12  -7    1.07    3.47
  -2  12  -7    5.30    3.63
   2  12   7    8.61    4.61
   2  12   7   12.11    5.32
  -2 -12  -8    3.34    2.99
  -2 -12  -8    9.27    3.89
  -2  12  -8    6.75    4.33
   2  12   8   22.31    6.20
   2  12   8   23.76    6.51
  -2 -12  -9   33.94    6.15
  -2  12  -9   18.13    5.93
   2  12   9   67.90    9.78
   2  12   9   71.17   10.04
  -2  12 -10   13.95    6.20
   2  12  10   64.41   10.14
   2  12  10   51.94    9.38
   2  12  11   12.43    7.72
   2 -13 -12    6.35    5.40
   2 -13 -11    2.76    4.35
   2 -13 -11    1.45    4.35
  -2  13  10    9.89    4.81
  -2  13  10   11.80    5.92
   2 -13 -10    8.46    4.75
   2 -13 -10    4.60    4.51
   2  13 -10    1.45    4.53
  -2  13   9   23.52    5.50
  -2  13   9   36.10    6.68
   2 -13  -9   25.46    5.76
   2 -13  -9   22.10    5.37
   2  13  -9   12.78    5.02
  -2  13   8   39.87    6.12
  -2  13   8   39.78    6.50
   2 -13  -8   31.18    5.92
   2 -13  -8   32.16    5.74
   2  13  -8   22.51    5.42
  -2 -13   7   57.99    6.17
  -2  13   7   71.63    6.98
  -2  13   7   68.22    7.38
   2 -13  -7   45.12    6.42
   2 -13  -7   46.42    6.28
   2  13  -7   54.44    7.16
  -2 -13   6   28.63    4.71
  -2 -13   6   32.34    4.65
  -2  13   6   26.31    4.90
  -2  13   6   24.52    5.10
   2 -13  -6   23.89    4.84
   2 -13  -6   23.90    4.79
   2  13  -6   18.21    4.59
  -2 -13   5    9.94    3.23
  -2 -13   5   10.41    3.17
  -2  13   5   14.45    3.68
  -2  13   5   14.93    3.96
   2 -13  -5    7.95    3.18
   2 -13  -5    9.28    3.36
   2  13  -5   14.97    4.01
  -2 -13   4   80.63    6.50
  -2 -13   4   77.35    6.13
  -2  13   4   83.83    6.84
  -2  13   4   78.17    6.93
   2 -13  -4   55.84    5.96
   2 -13  -4   62.21    6.10
   2  13  -4  113.08    7.97
   2  13  -4   77.88    5.37
  -2 -13   3   53.87    5.35
  -2 -13   3   53.54    5.19
  -2  13   3   51.83    5.44
  -2  13   3   48.10    5.32
   2 -13  -3   37.75    4.91
   2 -13  -3   49.73    5.34
   2  13  -3   61.64    5.03
   2  13  -3   80.25    6.65
  -2 -13   2   78.90    6.20
  -2 -13   2   88.41    6.53
  -2  13   2  101.80    7.00
  -2  13   2   95.94    7.30
   2 -13  -2   73.87    6.09
   2 -13  -2   75.08    6.15
   2  13  -2  125.34    7.07
   2  13  -2  150.23    8.39
   2  13  -2  124.54    6.97
  -2 -13   1  383.22   13.32
  -2 -13   1  364.95   12.95
  -2  13   1  451.13   14.63
  -2  13   1  431.21   14.28
   2 -13  -1  368.70   12.69
   2 -13  -1  357.90   12.42
   2  13  -1  588.88   15.21
   2  13  -1  706.92   16.94
   2  13  -1  590.93   15.15
  -2 -13   0   64.01    5.82
  -2 -13   0   68.20    5.92
  -2 -13   0   94.60    6.44
  -2  13   0   90.03    6.72
  -2  13   0   83.75    6.63
   2 -13   0   72.45    5.79
   2 -13   0   75.11    5.70
   2  13   0  118.86    7.38
   2  13   0  140.42    7.97
  -2 -13  -1  269.01   11.44
  -2 -13  -1  281.57   11.76
  -2 -13  -1  402.83   12.77
  -2  13  -1  400.97   13.69
  -2  13  -1  384.02   13.40
   2 -13   1  333.06   11.33
   2 -13   1  323.16   11.04
   2  13   1  554.03   15.85
   2  13   1  567.09   16.07
  -2 -13  -2   39.22    4.67
  -2 -13  -2   43.57    5.06
  -2 -13  -2   53.90    5.14
  -2  13  -2   64.65    5.98
  -2  13  -2   28.77    3.94
  -2  13  -2   65.52    5.94
   2 -13   2   52.28    4.79
   2 -13   2   50.36    4.57
   2  13   2   87.11    6.99
   2  13   2  101.45    7.62
  -2 -13  -3   89.66    7.04
  -2 -13  -3   86.23    6.95
  -2 -13  -3  140.78    8.07
  -2  13  -3  137.95    8.45
  -2  13  -3   62.35    5.66
  -2  13  -3  137.64    8.46
   2 -13   3  123.48    6.59
   2  13   3  199.99   10.66
   2  13   3  205.48   10.70
  -2 -13  -4   63.07    6.15
  -2 -13  -4   49.94    5.60
  -2 -13  -4   98.86    7.12
  -2  13  -4  105.31    7.59
  -2  13  -4   11.07    3.11
  -2  13  -4   85.07    6.90
   2  13   4  147.97    9.80
   2  13   4  177.00   10.59
  -2 -13  -5   10.82    3.43
  -2 -13  -5   10.53    3.29
  -2 -13  -5   12.42    3.54
  -2  13  -5   12.69    3.70
  -2  13  -5    6.54    3.68
  -2  13  -5   13.81    4.03
   2  13   5   52.13    5.71
   2  13   5   27.69    5.69
  -2 -13  -6    6.65    3.17
  -2 -13  -6    9.97    3.46
  -2 -13  -6   17.39    4.24
  -2  13  -6   14.00    3.96
  -2  13  -6    4.46    3.53
  -2  13  -6   10.83    3.95
   2  13   6   18.42    5.57
   2  13   6   31.61    6.45
  -2 -13  -7   49.67    6.49
  -2 -13  -7   50.62    6.22
  -2 -13  -7   89.00    7.94
  -2  13  -7  100.90    8.31
  -2  13  -7   33.76    6.33
  -2  13  -7   99.50    8.55
   2  13   7  151.76   11.35
   2  13   7  167.30   11.93
  -2 -13  -8    7.77    3.73
  -2 -13  -8   11.75    4.01
  -2 -13  -8   10.65    4.28
  -2  13  -8    5.95    4.72
   2  13   8   13.35    6.54
   2  13   8   19.43    7.07
  -2  13  -9   -2.94    3.78
   2  13   9    3.97    5.57
   2  13   9    0.02    5.50
  -2  13 -10   17.70    6.79
   2  13  10   78.99   11.13
   2  13  11   51.90   10.45
   2 -14 -12   -3.98    4.65
  -2  14  11   16.08    5.87
   2 -14 -11   21.76    6.60
   2 -14 -11    6.45    4.98
  -2  14  10    7.29    4.33
  -2  14  10   20.13    6.24
   2 -14 -10   12.16    5.11
   2 -14 -10   10.69    5.25
   2  14 -10    4.74    5.17
  -2  14   9   18.51    5.25
  -2  14   9   22.03    6.27
   2 -14  -9   16.59    5.22
   2 -14  -9   14.65    5.07
   2  14  -9   11.76    5.06
  -2  14   8   13.53    4.63
  -2  14   8   11.61    4.97
   2 -14  -8    8.22    4.16
   2 -14  -8    5.81    3.97
   2  14  -8    6.18    4.30
  -2  14   7    8.65    3.90
  -2  14   7    5.47    3.89
   2 -14  -7    5.40    3.46
   2 -14  -7    7.61    3.90
   2  14  -7    7.67    3.82
  -2 -14   6   56.62    6.05
  -2 -14   6   61.89    6.18
  -2  14   6   63.52    6.86
  -2  14   6   56.37    6.84
   2 -14  -6   42.89    5.98
   2 -14  -6   48.08    6.36
   2  14  -6   50.34    6.60
  -2 -14   5   59.78    6.27
  -2 -14   5   62.07    6.05
  -2  14   5   60.33    6.47
  -2  14   5   68.31    7.01
   2 -14  -5   52.11    6.22
   2 -14  -5   50.12    6.05
   2  14  -5   71.29    6.88
  -2 -14   4   11.82    3.42
  -2 -14   4   11.11    3.17
  -2  14   4    8.70    3.15
  -2  14   4    7.19    3.27
   2 -14  -4    9.66    3.54
   2 -14  -4   10.43    3.31
   2  14  -4    9.74    3.46
   2  14  -4   10.44    2.91
  -2 -14   3   95.10    7.22
  -2 -14   3   94.32    7.06
  -2  14   3  116.95    7.87
  -2  14   3   93.73    7.45
   2 -14  -3   71.56    6.48
   2 -14  -3   77.46    6.72
   2  14  -3  118.21    7.10
   2  14  -3  139.84    8.71
  -2 -14   2  211.38   10.38
  -2 -14   2  220.34   10.53
  -2  14   2  253.90   11.44
  -2  14   2  238.38   11.29
   2 -14  -2  195.93   10.09
   2 -14  -2  194.03    9.90
   2  14  -2  300.14   11.17
   2  14  -2  396.35   13.61
   2  14  -2  288.76   10.82
  -2 -14   1   41.34    4.90
  -2 -14   1   40.75    4.84
  -2  14   1   40.22    5.31
  -2  14   1   35.01    4.94
   2 -14  -1   46.94    5.28
   2 -14  -1   43.72    4.90
   2  14  -1   51.81    5.32
   2  14  -1   65.49    5.99
   2  14  -1   46.64    5.12
  -2 -14   0  103.40    7.42
  -2 -14   0  107.61    7.53
  -2 -14   0  146.48    8.06
  -2  14   0  137.29    8.50
  -2  14   0  139.23    8.60
   2 -14   0  107.11    7.20
   2 -14   0  112.09    7.24
   2  14   0  183.70    9.49
   2  14   0  183.72    9.32
  -2 -14  -1  252.31   11.51
  -2 -14  -1  253.55   11.66
  -2 -14  -1  361.32   12.50
  -2  14  -1  346.33   13.29
  -2  14  -1  346.40   13.33
   2 -14   1  291.26   11.12
   2 -14   1  279.83   10.79
   2  14   1  497.04   15.74
   2  14   1  495.50   15.67
  -2 -14  -2  162.96    9.54
  -2 -14  -2  155.88    9.30
  -2 -14  -2  262.67   10.84
  -2  14  -2  260.55   11.70
  -2  14  -2  242.05   11.28
   2 -14   2  223.99    9.50
   2 -14   2  213.14    9.22
   2  14   2  369.13   14.06
   2  14   2  369.72   14.17
  -2 -14  -3   22.96    4.12
  -2 -14  -3   24.27    4.41
  -2 -14  -3   34.40    4.66
  -2  14  -3   43.58    5.64
  -2  14  -3   11.45    3.36
  -2  14  -3   45.02    5.69
   2 -14   3   31.02    3.80
   2  14   3   60.78    6.41
   2  14   3   65.33    6.98
  -2 -14  -4   73.59    6.87
  -2 -14  -4   67.34    6.55
  -2 -14  -4  114.63    7.79
  -2  14  -4  119.27    8.39
  -2  14  -4  122.69    8.52
   2  14   4  184.88   10.95
   2  14   4  193.91   11.36
  -2 -14  -5   22.97    4.44
  -2 -14  -5   19.94    4.19
  -2 -14  -5   46.26    5.55
  -2  14  -5   50.08    5.99
  -2  14  -5   15.44    4.26
  -2  14  -5   45.17    6.07
   2  14   5   74.44    7.41
   2  14   5   74.33    7.91
  -2 -14  -6    4.33    3.04
  -2 -14  -6    2.08    2.51
  -2 -14  -6    6.05    3.14
  -2  14  -6    9.49    3.68
  -2  14  -6    4.90    3.81
  -2  14  -6    5.39    3.67
   2  14   6   11.07    4.74
   2  14   6   12.66    5.33
  -2 -14  -7    1.07    2.64
  -2 -14  -7   -0.81    2.31
  -2 -14  -7    2.84    3.01
  -2  14  -7   -0.58    2.97
  -2  14  -7    0.49    3.78
   2  14   7    1.37    4.03
   2  14   7    4.24    5.36
  -2 -14  -8   22.38    5.24
  -2 -14  -8   27.46    5.54
  -2  14  -8   11.29    5.11
   2  14   8   63.58    9.37
   2  14   8   61.72    9.37
  -2  14  -9   27.96    7.18
   2  14   9  122.09   12.11
   2  14   9  146.24   13.45
   2  14  10   45.81    9.49
  -2  15  11    0.95    4.42
   2 -15 -11    0.77    4.44
  -2  15  10   -0.68    3.33
  -2  15  10   -1.84    4.88
   2 -15 -10    0.71    3.93
   2 -15 -10    1.44    4.22
   2  15 -10   -2.60    4.39
  -2  15   9   19.65    5.30
  -2  15   9   21.07    6.49
   2 -15  -9   15.13    5.04
   2 -15  -9   15.74    5.31
   2  15  -9    8.79    5.14
  -2  15   8   10.93    4.73
  -2  15   8   22.80    6.14
   2 -15  -8   15.76    5.20
   2 -15  -8   15.71    5.09
   2  15  -8   10.30    4.78
  -2  15   7    3.80    3.54
  -2  15   7    4.08    3.81
   2 -15  -7    2.34    3.11
   2 -15  -7    4.11    3.34
   2  15  -7    2.05    3.31
  -2 -15   6  101.05    8.25
  -2 -15   6   98.09    7.83
  -2  15   6  110.78    9.05
  -2  15   6  104.06    9.03
   2 -15  -6   76.23    7.88
   2 -15  -6   75.40    7.63
   2  15  -6   93.60    8.68
  -2 -15   5  152.37    9.39
  -2 -15   5  133.12    8.76
  -2  15   5  131.13    9.51
  -2  15   5  147.19   10.17
   2 -15  -5  111.51    8.87
   2 -15  -5   92.49    8.06
   2  15  -5  152.41   10.09
  -2 -15   4  100.87    7.72
  -2 -15   4   90.47    7.23
  -2  15   4  110.95    8.69
  -2  15   4  110.76    8.69
   2 -15  -4   81.90    7.49
   2 -15  -4   73.74    7.01
   2  15  -4  152.06    9.52
  -2 -15   3   11.03    3.35
  -2 -15   3   10.86    3.23
  -2  15   3   10.76    3.69
   2 -15  -3    8.67    3.36
   2 -15  -3    8.32    3.11
   2  15  -3   15.39    3.65
   2  15  -3   20.47    4.49
   2  15  -3    9.77    3.08
  -2 -15   2    8.03    2.96
  -2 -15   2    5.73    2.57
  -2  15   2    7.45    3.04
  -2  15   2    3.02    2.87
   2 -15  -2    4.20    2.74
   2 -15  -2    4.69    2.63
   2  15  -2    9.75    3.36
   2  15  -2   14.90    3.82
   2  15  -2    8.34    3.06
  -2 -15   1  313.86   13.08
  -2 -15   1  296.15   12.67
  -2  15   1  396.75   14.85
  -2  15   1  370.52   14.30
   2 -15  -1  304.36   12.53
   2 -15  -1  291.68   12.20
   2  15  -1  496.87   15.32
   2  15  -1  609.00   16.90
   2  15  -1  502.50   15.24
  -2 -15   0   55.48    5.97
  -2 -15   0   47.35    5.42
  -2 -15   0   66.48    5.94
  -2  15   0   40.78    5.54
  -2  15   0   44.77    5.43
   2 -15   0   48.55    5.37
   2 -15   0   47.12    5.20
   2  15   0   61.07    6.00
   2  15   0   58.10    6.07
  -2 -15  -1   17.71    3.83
  -2 -15  -1   14.90    3.68
  -2 -15  -1   16.47    3.58
  -2  15  -1   22.71    4.48
  -2  15  -1   18.39    4.13
   2 -15   1   12.82    3.17
   2 -15   1   17.08    3.45
   2  15   1   22.95    4.71
   2  15   1   30.45    5.13
  -2 -15  -2    9.88    3.18
  -2 -15  -2    7.03    3.05
  -2 -15  -2   10.65    3.09
  -2  15  -2    9.26    3.48
  -2  15  -2   13.36    3.99
   2 -15   2   11.87    3.07
   2 -15   2   14.78    3.20
   2  15   2   13.55    3.93
   2  15   2   16.81    4.52
  -2 -15  -3   64.61    6.53
  -2 -15  -3   63.92    6.54
  -2 -15  -3   91.52    7.02
  -2  15  -3   93.50    7.49
  -2  15  -3  104.82    8.08
   2  15   3  145.52    9.77
   2  15   3  152.64   10.10
  -2 -15  -4   26.17    4.79
  -2 -15  -4   21.12    4.45
  -2 -15  -4   35.86    5.11
  -2  15  -4   37.18    5.58
  -2  15  -4   12.05    3.98
  -2  15  -4   40.93    5.87
   2  15   4   53.91    6.67
   2  15   4   60.41    7.32
  -2 -15  -5   19.48    4.40
  -2 -15  -5   13.39    3.88
  -2 -15  -5   31.82    5.13
  -2  15  -5   34.70    5.57
  -2  15  -5   11.53    4.12
  -2  15  -5   32.76    5.60
   2  15   5   53.23    7.55
   2  15   5   47.17    7.08
  -2 -15  -6    2.02    2.44
  -2 -15  -6    1.39    2.31
  -2 -15  -6    4.27    2.89
  -2  15  -6    6.75    3.77
  -2  15  -6    2.11    3.62
  -2  15  -6    5.19    3.66
   2  15   6    9.69    5.04
  -2 -15  -7   12.97    4.33
  -2 -15  -7   15.49    4.49
  -2  15  -7    0.87    3.84
   2  15   7   30.23    7.19
   2  15   7   31.60    7.54
  -2 -15  -8   23.14    5.51
  -2 -15  -8   18.88    5.21
  -2  15  -8    8.81    5.07
   2  15   8   48.91    8.42
   2  15   8   51.94    9.23
  -2  15  -9   -1.40    4.90
   2  15   9    4.30    5.41
   2  15  10    7.98    6.88
  -2  16  11    1.16    4.26
   2 -16 -11    0.36    4.16
  -2  16  10    7.75    4.61
  -2  16  10    5.14    5.73
   2 -16 -10    9.25    5.12
  -2  16   9    2.42    4.01
  -2  16   9    6.60    5.12
   2 -16  -9    2.65    3.91
   2 -16  -9    4.66    4.26
   2  16  -9    2.97    4.59
  -2  16   8   28.47    6.44
  -2  16   8   29.69    6.78
   2 -16  -8   15.00    5.42
   2 -16  -8   22.05    5.56
   2  16  -8   11.70    4.90
  -2  16   7    3.42    3.49
  -2  16   7    8.84    4.70
   2 -16  -7    2.15    3.44
   2 -16  -7    4.52    3.49
   2  16  -7    7.98    4.53
  -2 -16   6   11.08    4.15
  -2 -16   6   14.83    4.08
  -2  16   6    4.49    3.52
  -2  16   6   10.33    4.34
   2 -16  -6    5.89    3.44
   2 -16  -6    5.68    3.52
   2  16  -6    7.43    4.29
  -2 -16   5  171.17   10.33
  -2 -16   5  163.27   10.01
  -2  16   5  172.92   11.10
  -2  16   5  164.45   10.98
   2 -16  -5  123.45    9.43
   2 -16  -5  130.62    9.70
   2  16  -5  178.30   11.18
  -2 -16   4  176.59   10.34
  -2 -16   4  168.83   10.04
  -2  16   4  209.10   11.79
  -2  16   4  186.11   11.28
   2 -16  -4  136.17    9.61
   2 -16  -4  152.71   10.12
   2  16  -4  258.36   12.69
  -2 -16   3    8.28    3.31
  -2 -16   3    8.81    3.07
  -2  16   3   12.30    4.00
   2 -16  -3    5.25    3.10
   2 -16  -3    8.52    3.42
   2  16  -3   11.53    3.54
   2  16  -3   14.14    4.36
   2  16  -3   10.14    3.38
  -2 -16   2    1.11    2.06
  -2 -16   2    5.23    2.67
  -2  16   2    1.71    2.27
  -2  16   2    1.61    2.63
   2 -16  -2    5.09    2.87
   2 -16  -2    2.21    2.10
   2  16  -2    3.83    2.68
   2  16  -2    5.92    3.41
   2  16  -2    4.57    3.14
  -2 -16   1   52.52    6.02
  -2 -16   1   48.61    5.59
  -2  16   1   66.80    6.84
  -2  16   1   66.66    6.76
   2 -16  -1   53.39    5.99
   2 -16  -1   54.08    5.80
   2  16  -1   86.15    7.11
   2  16  -1   98.55    7.60
   2  16  -1   84.05    7.01
  -2 -16   0  144.26    9.43
  -2 -16   0  144.25    9.29
  -2  16   0  187.97   10.63
  -2  16   0  185.80   10.73
   2 -16   0  162.02    9.42
   2 -16   0  149.00    8.91
   2  16   0  262.67   12.01
   2  16   0  273.61   12.24
  -2 -16  -1    7.75    3.38
  -2 -16  -1    7.35    2.98
  -2 -16  -1   15.76    3.63
  -2  16  -1    4.63    3.03
  -2  16  -1    7.67    3.29
   2 -16   1    7.14    2.85
   2 -16   1    9.11    2.93
   2  16   1   10.57    3.93
   2  16   1    8.74    3.63
  -2 -16  -2   27.95    4.91
  -2 -16  -2   29.71    4.99
  -2 -16  -2   41.58    5.10
  -2  16  -2   41.04    5.93
  -2  16  -2   35.62    5.38
   2 -16   2   39.38    5.08
   2 -16   2   33.49    4.50
   2  16   2   50.27    6.56
   2  16   2   53.35    6.54
  -2 -16  -3   10.79    3.63
  -2 -16  -3   14.31    3.90
  -2 -16  -3   27.97    4.55
  -2  16  -3   20.80    4.55
  -2  16  -3   20.28    4.56
   2  16   3   24.26    5.50
   2  16   3   27.38    5.60
  -2 -16  -4   73.16    7.39
  -2 -16  -4   74.84    7.40
  -2 -16  -4   98.11    7.67
  -2  16  -4  122.58    9.11
  -2  16  -4  119.27    9.02
   2  16   4  165.59   11.16
   2  16   4  184.27   11.77
  -2 -16  -5   14.46    4.23
  -2 -16  -5   14.08    4.32
  -2 -16  -5   20.29    4.49
  -2  16  -5   24.15    5.19
  -2  16  -5   20.30    4.98
   2  16   5   29.62    6.19
   2  16   5   37.31    6.83
  -2 -16  -6    3.68    3.05
  -2 -16  -6    1.14    2.76
  -2  16  -6    3.71    3.30
  -2  16  -6    1.90    3.73
  -2  16  -6    3.68    3.89
   2  16   6    6.25    5.25
  -2 -16  -7   12.50    4.52
  -2 -16  -7   11.47    4.23
  -2  16  -7    2.72    4.37
   2  16   7   29.93    7.38
   2  16   7   23.42    6.99
  -2 -16  -8    7.72    4.05
  -2 -16  -8    4.86    3.66
  -2  16  -8    2.37    4.72
   2  16   8    8.83    5.83
   2  16   8   15.98    7.06
  -2  16  -9   -0.17    4.72
   2  16   9    7.35    5.78
   2  16  10    4.47    6.58
  -2  17  10    1.98    4.14
   2 -17 -10    2.53    4.34
  -2  17   9    3.46    4.16
  -2  17   9    7.44    5.78
   2 -17  -9    2.32    4.09
   2 -17  -9    0.19    3.94
   2  17  -9    1.95    4.63
  -2  17   8    6.85    4.36
  -2  17   8    8.07    5.13
   2 -17  -8   12.78    5.17
   2 -17  -8    9.05    4.53
   2  17  -8    4.69    4.64
  -2  17   7   72.70    8.55
  -2  17   7   56.55    7.98
   2 -17  -7   43.91    6.95
   2 -17  -7   46.53    7.30
   2  17  -7   37.96    7.00
  -2 -17   6   33.65    6.05
  -2 -17   6   37.76    5.91
  -2  17   6   38.52    6.45
  -2  17   6   34.61    6.65
   2 -17  -6   30.13    6.00
   2 -17  -6   27.66    5.71
   2  17  -6   31.83    6.38
  -2 -17   5  126.55    9.49
  -2 -17   5  119.85    9.01
  -2  17   5  121.38    9.74
  -2  17   5  138.55   10.68
   2 -17  -5   88.54    8.55
   2 -17  -5  100.78    8.91
   2  17  -5  151.59   10.72
  -2 -17   4   51.97    6.57
  -2 -17   4   44.63    5.96
  -2  17   4   53.88    7.24
  -2  17   4   54.88    7.32
   2 -17  -4   35.94    5.92
   2 -17  -4   30.30    5.41
   2  17  -4   67.85    7.41
  -2 -17   3   54.58    6.43
  -2 -17   3   51.23    5.95
  -2  17   3   68.73    6.85
  -2  17   3   51.51    6.90
   2 -17  -3   40.73    6.05
   2 -17  -3   44.02    6.08
   2  17  -3   69.00    6.55
   2  17  -3   77.88    7.58
   2  17  -3   53.15    5.86
  -2 -17   2   96.85    8.06
  -2 -17   2   95.41    7.96
  -2  17   2  129.20    9.41
  -2  17   2  101.03    8.48
   2 -17  -2   82.72    7.61
   2 -17  -2   83.82    7.44
   2  17  -2  127.74    8.65
   2  17  -2  178.30   10.22
   2  17  -2  136.83    8.94
  -2 -17   1   21.42    4.59
  -2 -17   1   25.09    4.72
  -2  17   1   23.41    4.94
  -2  17   1   27.91    5.35
   2 -17  -1   23.91    4.65
   2 -17  -1   23.21    4.53
   2  17  -1   41.61    5.84
   2  17  -1   38.35    5.77
   2  17  -1   32.97    5.32
  -2 -17   0    2.93    2.51
  -2 -17   0    0.54    1.98
  -2  17   0    1.32    2.79
  -2  17   0    2.23    2.98
   2 -17   0    3.26    2.42
   2 -17   0    2.00    2.21
   2  17   0    2.67    2.71
   2  17   0    5.34    3.37
   2  17   0    3.82    3.23
  -2 -17  -1   65.33    6.75
  -2 -17  -1   68.26    6.95
  -2 -17  -1   92.76    7.24
  -2  17  -1   88.02    7.79
  -2  17  -1   78.90    7.43
   2 -17   1   75.86    6.82
   2 -17   1   72.90    6.60
   2  17   1  111.44    8.61
   2  17   1  113.76    8.92
  -2 -17  -2    9.94    3.61
  -2 -17  -2    9.22    3.68
  -2 -17  -2   12.14    3.50
  -2  17  -2   18.57    4.71
  -2  17  -2   15.48    4.45
   2 -17   2   11.93    3.54
   2 -17   2   10.85    3.16
   2  17   2   22.34    5.36
   2  17   2   17.66    4.86
  -2 -17  -3   -0.14    2.30
  -2 -17  -3    2.73    2.61
  -2 -17  -3    4.22    2.80
  -2  17  -3    0.54    2.26
  -2  17  -3   -0.05    2.66
   2  17   3    1.67    3.61
   2  17   3    6.83    3.97
  -2 -17  -4    3.12    2.82
  -2 -17  -4    4.93    3.07
  -2  17  -4    6.52    3.43
  -2  17  -4    9.91    4.15
   2  17   4   10.39    4.78
   2  17   4   12.08    4.80
  -2 -17  -5    3.77    2.86
  -2 -17  -5    6.03    3.76
  -2  17  -5   13.59    4.60
  -2  17  -5   17.09    4.95
   2  17   5   20.37    5.88
   2  17   5   22.51    6.37
  -2 -17  -6   12.65    4.58
  -2 -17  -6   17.16    5.03
  -2  17  -6   25.60    5.67
  -2  17  -6   20.53    5.25
   2  17   6   37.99    7.46
   2  17   6   32.00    7.24
  -2 -17  -7    3.32    3.36
  -2 -17  -7    2.83    3.45
   2  17   7    2.83    4.86
   2  17   7    6.46    6.32
  -2 -17  -8    0.25    3.33
  -2 -17  -8    0.36    3.56
   2  17   8    4.09    5.72
  -2 -17  -9    4.91    4.22
   2  17   9    4.32    6.12
  -2  18  10    1.14    3.97
   2 -18 -10    1.45    4.55
  -2  18   9   -0.42    4.06
   2 -18  -9   -1.42    3.73
  -2  18   8   22.85    6.42
  -2  18   8   22.65    6.79
   2 -18  -8   15.39    5.34
   2 -18  -8   22.12    6.05
   2  18  -8   13.13    5.80
  -2  18   7   34.95    6.79
  -2  18   7   40.47    7.50
   2 -18  -7   28.49    6.08
   2 -18  -7   33.58    6.46
   2  18  -7   24.73    6.38
  -2 -18   6   38.22    6.61
  -2  18   6   28.60    6.27
  -2  18   6   33.61    7.05
   2 -18  -6   21.03    5.38
   2 -18  -6   31.64    6.34
   2  18  -6   31.58    6.33
  -2 -18   5   14.41    4.75
  -2 -18   5   13.59    4.25
  -2  18   5   23.33    5.88
  -2  18   5   15.29    5.14
   2 -18  -5    7.12    3.80
   2 -18  -5    2.96    3.28
   2  18  -5   15.97    5.26
  -2 -18   4  116.38    9.36
  -2 -18   4  126.12    9.41
  -2  18   4  158.67   10.51
  -2  18   4  142.26   10.89
   2 -18  -4   96.50    8.90
   2 -18  -4   86.02    8.33
   2  18  -4  165.47   10.98
  -2 -18   3   39.90    6.02
  -2 -18   3   41.68    5.87
  -2  18   3   54.29    6.57
  -2  18   3   51.23    7.12
   2 -18  -3   33.58    5.82
   2 -18  -3   32.75    5.67
   2  18  -3   61.39    6.69
   2  18  -3   75.90    7.85
   2  18  -3   56.42    6.30
  -2 -18   2  126.14    9.48
  -2 -18   2  129.09    9.38
  -2  18   2  152.94   10.60
  -2  18   2  152.67   10.74
   2 -18  -2  109.30    8.96
   2 -18  -2  110.92    8.77
   2  18  -2  177.94   10.43
   2  18  -2  212.25   11.57
   2  18  -2  165.38   10.12
  -2 -18   1   36.44    5.79
  -2 -18   1   28.97    5.28
  -2  18   1   34.22    5.93
  -2  18   1   30.15    5.65
   2 -18  -1   32.34    5.33
   2 -18  -1   24.14    4.75
   2  18  -1   47.23    6.31
   2  18  -1   58.75    6.81
   2  18  -1   44.36    6.27
  -2 -18   0   14.60    3.96
  -2 -18   0   14.25    4.08
  -2  18   0   24.96    5.60
  -2  18   0   19.37    5.04
   2 -18   0   18.11    4.24
   2 -18   0   17.62    4.19
   2  18   0   26.35    5.36
   2  18   0   16.70    4.32
   2  18   0   30.59    5.66
  -2 -18  -1   52.68    6.57
  -2 -18  -1   50.34    6.23
  -2 -18  -1   64.20    6.56
  -2  18  -1   67.04    7.37
  -2  18  -1   62.19    7.14
   2 -18   1   52.20    6.11
   2 -18   1   62.56    6.48
   2  18   1   86.76    8.02
   2  18   1   91.41    8.39
  -2 -18  -2   32.16    5.49
  -2 -18  -2   38.74    6.17
  -2 -18  -2   48.87    5.95
  -2  18  -2   41.76    6.50
  -2  18  -2   42.10    6.35
   2 -18   2   44.55    5.88
   2 -18   2   37.73    5.39
   2  18   2   62.35    7.89
   2  18   2   57.39    7.58
  -2 -18  -3   -1.07    2.20
  -2 -18  -3    2.48    2.67
  -2  18  -3   -0.20    2.72
  -2  18  -3    0.08    2.68
   2  18   3    1.29    3.95
   2  18   3    4.91    4.29
  -2 -18  -4   -2.21    1.82
  -2 -18  -4   -0.53    2.14
  -2  18  -4    1.36    2.98
  -2  18  -4    0.66    3.11
   2  18   4    3.75    4.03
   2  18   4    1.16    3.99
  -2 -18  -5   15.54    4.80
  -2 -18  -5   13.86    4.84
  -2  18  -5   31.21    5.88
  -2  18  -5   26.52    5.99
   2  18   5   46.64    8.00
   2  18   5   32.86    6.91
  -2 -18  -6   17.35    5.06
  -2 -18  -6   11.16    4.58
  -2  18  -6   23.48    5.73
   2  18   6   36.44    7.77
   2  18   6   35.81    8.03
  -2 -18  -7   16.66    5.35
  -2 -18  -7   15.74    5.19
   2  18   7   35.25    8.00
   2  18   7   39.21    8.80
  -2 -18  -8    1.57    3.81
  -2 -18  -8    0.86    3.98
   2  18   8    3.29    6.00
  -2 -18  -9    3.92    4.42
   2  18   9   23.95    8.46
  -2  19   9    4.33    5.16
   2 -19  -9    7.55    4.92
  -2  19   8    5.70    4.56
  -2  19   8   12.24    6.02
   2 -19  -8    5.14    4.55
   2  19  -8    9.51    5.41
  -2  19   7   11.62    5.03
  -2  19   7   19.20    6.63
   2 -19  -7   12.71    4.99
   2 -19  -7   16.17    5.56
   2  19  -7   16.62    5.70
  -2  19   6   14.71    5.51
  -2  19   6   17.79    6.03
   2 -19  -6    9.80    4.52
   2 -19  -6   10.37    4.73
   2  19  -6   15.38    5.27
  -2 -19   5    9.31    4.54
  -2 -19   5    8.13    4.08
  -2  19   5   10.52    4.41
  -2  19   5   12.89    5.14
   2 -19  -5    5.01    3.95
   2 -19  -5    7.02    3.89
   2  19  -5   11.93    5.12
  -2 -19   4   51.22    7.06
  -2 -19   4   39.50    6.04
  -2  19   4  113.27    7.56
  -2  19   4   51.12    7.64
   2 -19  -4   31.13    6.09
   2 -19  -4   35.41    6.25
  -2 -19   3  119.83    9.67
  -2 -19   3  125.31    9.68
  -2  19   3  141.43   10.88
  -2  19   3  148.77   11.18
   2 -19  -3   98.55    9.09
   2 -19  -3  108.52    9.35
   2  19  -3  207.26   12.21
  -2 -19   2   16.17    4.55
  -2 -19   2   17.09    4.49
  -2  19   2   11.79    4.75
  -2  19   2   20.12    5.47
   2 -19  -2   10.89    4.04
   2 -19  -2   10.51    4.03
   2  19  -2   21.52    5.17
   2  19  -2   31.35    5.99
   2  19  -2   20.69    4.85
  -2 -19   1   26.81    5.38
  -2 -19   1   26.39    5.27
  -2  19   1   33.87    6.30
  -2  19   1   28.88    5.97
   2 -19  -1   22.86    4.87
   2 -19  -1   29.39    5.20
   2  19  -1   32.25    5.97
   2  19  -1   42.07    6.52
  -2 -19   0   45.94    6.57
  -2 -19   0   46.49    6.64
  -2  19   0   55.72    7.48
  -2  19   0   53.55    7.37
   2 -19   0   51.39    6.41
   2 -19   0   47.86    6.29
   2  19   0   71.78    7.82
   2  19   0   64.99    7.52
  -2 -19  -1   13.62    4.21
  -2 -19  -1   18.58    4.74
  -2  19  -1   23.54    5.18
  -2  19  -1   26.60    5.65
   2 -19   1   15.91    4.38
   2 -19   1   15.15    4.04
   2  19   1   33.59    6.29
   2  19   1   35.13    6.53
  -2 -19  -2   19.56    4.83
  -2 -19  -2   19.29    4.95
  -2  19  -2   26.48    5.81
  -2  19  -2   23.76    5.54
   2  19   2   34.83    6.50
   2  19   2   34.31    6.66
  -2 -19  -3   47.86    7.06
  -2 -19  -3   43.55    6.69
  -2  19  -3   55.46    7.38
  -2  19  -3   38.48    6.20
   2  19   3   73.00    8.37
   2  19   3   78.34    8.76
  -2 -19  -4   12.61    4.50
  -2 -19  -4   10.49    4.52
  -2  19  -4   10.19    4.63
  -2  19  -4   13.90    5.24
   2  19   4   22.68    6.52
   2  19   4   17.35    5.81
  -2 -19  -5    8.39    4.26
  -2 -19  -5    5.99    3.90
  -2  19  -5   12.95    4.94
  -2  19  -5    8.46    4.76
   2  19   5   18.64    6.65
   2  19   5   18.05    6.39
  -2 -19  -6   52.79    7.86
  -2 -19  -6   44.84    7.34
   2  19   6  124.18   11.41
   2  19   6  124.60   12.20
  -2 -19  -7    0.67    3.50
  -2 -19  -7   -0.44    3.61
   2  19   7    3.52    5.13
  -2 -19  -8    3.49    4.03
   2  19   8    1.39    5.54
  -2  20   9    3.57    4.41
   2 -20  -9    0.97    3.90
  -2  20   8    1.81    4.16
   2 -20  -8    0.74    3.67
  -2  20   7   12.89    5.40
  -2  20   7   19.28    7.00
   2 -20  -7    5.71    4.57
   2  20  -7    3.09    4.74
  -2  20   6   33.07    7.48
  -2  20   6   30.23    7.26
   2 -20  -6   26.91    6.15
   2 -20  -6   23.97    6.24
   2  20  -6   26.95    6.54
  -2 -20   5   19.31    5.63
  -2 -20   5   20.65    5.22
  -2  20   5   23.33    6.46
  -2  20   5   20.62    6.36
   2 -20  -5   12.33    4.85
   2 -20  -5   15.92    5.26
   2  20  -5   16.16    5.56
  -2 -20   4    9.29    4.45
  -2 -20   4    9.39    4.00
  -2  20   4   10.59    4.94
  -2  20   4   12.95    5.60
   2 -20  -4    9.84    4.51
   2 -20  -4   10.17    4.42
   2  20  -4   15.14    5.36
  -2 -20   3   43.83    6.77
  -2 -20   3   45.61    6.69
  -2  20   3   63.42    8.62
  -2  20   3   61.27    8.42
   2 -20  -3   36.51    6.44
   2 -20  -3   37.28    6.50
   2  20  -3   80.88    8.64
  -2 -20   2  107.82    9.54
  -2 -20   2   96.94    8.88
  -2  20   2  126.09   10.52
  -2  20   2  112.56   10.08
   2 -20  -2   95.29    9.07
   2 -20  -2   94.70    8.90
   2  20  -2  127.91    9.76
  -2 -20   1   13.76    4.62
  -2 -20   1   11.95    4.23
  -2  20   1   11.96    4.65
  -2  20   1   15.84    4.97
   2 -20  -1    8.89    3.87
   2 -20  -1   13.76    4.37
   2  20  -1   16.80    5.01
   2  20  -1   22.45    5.68
  -2 -20   0   12.63    4.50
  -2 -20   0    8.52    3.85
  -2  20   0   11.98    5.02
  -2  20   0   14.75    5.29
   2 -20   0   15.97    4.65
   2 -20   0    9.59    3.95
   2  20   0   16.63    4.94
   2  20   0   19.27    5.57
  -2 -20  -1   94.75    9.03
  -2 -20  -1   99.95    9.15
  -2  20  -1  104.20    9.40
  -2  20  -1   95.34    9.01
   2 -20   1  114.67    9.27
   2 -20   1  101.70    8.66
   2  20   1  134.33   10.69
   2  20   1  150.16   11.16
  -2 -20  -2   17.21    4.89
  -2 -20  -2   15.41    4.73
  -2  20  -2   20.36    5.48
  -2  20  -2   15.38    4.92
   2  20   2   23.97    6.07
   2  20   2   31.67    6.71
  -2 -20  -3    6.11    3.75
  -2 -20  -3    1.31    2.92
  -2  20  -3    5.29    4.09
  -2  20  -3   -1.79    2.84
   2  20   3    6.23    4.46
   2  20   3    2.78    4.47
  -2 -20  -4    9.90    4.36
  -2 -20  -4   18.76    5.59
  -2  20  -4   27.42    6.18
  -2  20  -4   20.58    5.81
   2  20   4   23.69    6.78
   2  20   4   33.82    7.25
  -2 -20  -5   74.28    8.79
  -2 -20  -5   64.18    8.55
  -2  20  -5  106.07    9.86
   2  20   5  128.86   11.69
   2  20   5  145.92   12.85
  -2 -20  -6    5.66    3.81
  -2 -20  -6    8.71    4.73
   2  20   6   19.14    6.86
  -2 -20  -7    2.95    3.96
   2  20   7    9.51    6.32
  -2  21   8   -0.06    4.15
   2 -21  -8   -0.05    3.75
  -2  21   7    7.90    5.55
   2 -21  -7    5.50    4.63
   2  21  -7    6.55    5.38
  -2  21   6    3.34    4.35
   2 -21  -6    1.41    3.77
   2  21  -6    3.60    4.75
  -2 -21   5   33.12    6.67
  -2 -21   5   42.28    6.97
  -2  21   5   34.61    7.37
  -2  21   5   29.96    7.19
   2 -21  -5   25.34    6.07
   2 -21  -5   24.36    6.24
  -2 -21   4  101.40    9.67
  -2 -21   4   90.86    9.15
  -2  21   4  113.29   10.67
  -2  21   4  111.78   10.77
   2 -21  -4   87.17    9.26
   2 -21  -4   84.33    9.10
  -2 -21   3    9.13    4.28
  -2 -21   3    9.49    4.33
  -2  21   3    8.04    4.54
  -2  21   3   14.86    5.65
   2 -21  -3    9.34    4.27
   2 -21  -3   10.29    4.22
  -2 -21   2    5.25    3.97
  -2 -21   2   12.47    4.38
  -2  21   2   10.72    5.14
  -2  21   2    8.64    4.64
   2 -21  -2    5.26    3.97
   2 -21  -2    7.19    3.90
   2  21  -2   12.37    4.88
   2  21  -2   11.25    4.93
  -2 -21   1   23.65    5.75
  -2 -21   1   25.02    5.50
  -2  21   1   29.05    6.53
  -2  21   1   29.17    6.55
   2 -21  -1   23.36    5.49
   2 -21  -1   29.27    5.66
   2  21  -1   30.92    6.40
   2  21  -1   35.92    7.06
  -2 -21   0   75.78    8.54
  -2 -21   0   75.06    8.33
  -2  21   0   90.13    9.23
  -2  21   0   88.17    9.06
   2 -21   0   82.11    8.62
   2 -21   0   82.66    8.22
   2  21   0  117.43   10.25
   2  21   0  116.81   10.24
  -2 -21  -1    7.42    4.01
  -2 -21  -1    6.28    3.62
  -2  21  -1   15.54    5.42
  -2  21  -1   11.78    4.91
   2 -21   1    8.17    4.10
   2 -21   1   13.59    4.38
   2  21   1   17.92    5.67
   2  21   1   11.92    5.15
  -2 -21  -2   14.17    4.68
  -2 -21  -2   14.54    4.80
  -2  21  -2   17.90    5.92
  -2  21  -2   14.46    5.35
   2  21   2   15.37    5.88
   2  21   2   19.07    6.18
  -2 -21  -3   21.69    5.65
  -2 -21  -3   22.14    5.82
  -2  21  -3   22.62    6.03
   2  21   3   38.49    7.81
   2  21   3   30.07    7.29
  -2 -21  -4   27.83    6.25
  -2 -21  -4   36.35    7.00
  -2  21  -4   48.12    7.70
  -2  21  -4   40.63    7.39
   2  21   4   53.80    8.92
   2  21   4   51.38    8.90
  -2 -21  -5    4.28    3.67
  -2  21  -5    3.87    4.22
   2  21   5    2.83    5.05
  -2 -21  -6   24.61    6.35
   2  21   6   37.48    8.60
  -2 -21  -7    2.18    3.70
   2  21   7    2.79    5.81
  -2  22   7    0.40    4.74
   2 -22  -7   -0.02    3.44
  -2  22   6    5.15    5.19
   2 -22  -6    9.42    5.03
  -2 -22   5    7.72    4.81
  -2  22   5    7.88    4.90
   2 -22  -5    9.31    4.99
  -2 -22   4   34.17    6.97
  -2 -22   4   33.47    6.40
  -2  22   4   33.21    7.53
  -2  22   4   26.61    7.49
   2 -22  -4   21.54    5.98
   2 -22  -4   32.07    6.84
  -2 -22   3   24.71    6.07
  -2 -22   3   15.90    5.09
  -2  22   3   18.00    6.10
  -2  22   3   19.72    6.76
   2 -22  -3   20.91    5.75
   2 -22  -3   16.99    5.47
  -2 -22   2    5.93    4.06
  -2 -22   2    5.30    3.75
  -2  22   2    6.81    4.84
  -2  22   2    4.25    4.45
   2 -22  -2    3.98    3.75
   2 -22  -2    5.95    4.10
   2  22  -2    4.84    4.33
  -2 -22   1   37.60    6.95
  -2 -22   1   27.75    6.01
  -2  22   1   39.93    7.77
  -2  22   1   32.37    7.17
   2 -22  -1   32.54    6.32
   2 -22  -1   29.07    6.15
   2  22  -1   41.97    7.33
   2  22  -1   42.58    7.78
  -2 -22   0   29.27    6.38
  -2 -22   0   32.85    6.35
  -2  22   0   44.20    7.95
  -2  22   0   26.93    6.62
   2 -22   0   32.51    6.23
   2 -22   0   38.40    6.56
   2  22   0   52.68    8.26
   2  22   0   36.17    7.21
  -2 -22  -1   17.20    5.33
  -2 -22  -1   23.86    6.22
  -2  22  -1   34.79    7.04
  -2  22  -1   27.13    6.58
   2 -22   1   32.47    6.27
   2 -22   1   32.47    6.11
   2  22   1   41.41    7.54
   2  22   1   43.23    7.94
  -2 -22  -2    4.83    3.94
  -2 -22  -2    1.40    3.00
  -2  22  -2    0.40    3.73
  -2  22  -2   -0.32    4.10
   2  22   2   -0.87    4.50
   2  22   2   -1.35    3.84
  -2 -22  -3    4.14    3.73
  -2 -22  -3    4.39    3.85
  -2  22  -3    2.92    3.83
  -2  22  -3   -2.52    3.50
   2  22   3    0.26    4.14
   2  22   3    5.42    5.95
  -2 -22  -4    1.35    3.45
  -2  22  -4    1.57    4.36
  -2  22  -4    5.61    4.92
   2  22   4    5.93    5.62
  -2 -22  -5   26.36    6.41
  -2  22  -5   21.83    6.44
   2  22   5   37.64    8.31
  -2 -22  -6    0.53    3.72
   2  22   6    4.81    5.63
  -2  23   6    8.54    5.82
   2 -23  -6    7.11    4.85
  -2  23   5    9.16    5.83
   2 -23  -5    8.53    4.97
  -2 -23   4    8.49    5.18
  -2 -23   4    2.91    4.47
  -2  23   4    7.54    5.10
   2 -23  -4    4.70    4.51
  -2 -23   3   25.98    6.62
  -2 -23   3   18.07    5.76
  -2  23   3   23.55    6.89
   2 -23  -3   18.69    5.81
   2 -23  -3   17.71    5.96
  -2 -23   2    2.70    4.04
  -2 -23   2    1.95    4.07
  -2  23   2    0.55    4.17
  -2  23   2    5.02    5.27
   2 -23  -2   -0.40    3.29
   2 -23  -2    1.85    3.78
  -2 -23   1   12.30    5.26
  -2 -23   1   13.11    5.46
  -2  23   1   11.29    5.68
  -2  23   1   12.87    6.22
   2 -23  -1    9.61    4.77
   2 -23  -1    6.33    4.60
   2  23  -1   16.26    5.97
   2  23  -1   13.79    5.93
  -2 -23   0   16.41    5.57
  -2 -23   0   20.13    6.00
  -2  23   0   18.04    6.09
  -2  23   0   16.76    6.05
   2 -23   0   14.65    5.10
   2 -23   0   27.67    6.13
   2  23   0   21.94    6.23
   2  23   0   26.83    7.08
  -2 -23  -1   15.38    5.41
  -2 -23  -1   15.63    5.93
  -2  23  -1   19.89    6.42
  -2  23  -1   12.69    6.07
   2 -23   1   18.85    5.66
   2  23   1   23.67    6.99
   2  23   1   16.55    6.69
  -2 -23  -2    0.74    3.54
  -2  23  -2   -0.29    3.73
  -2  23  -2   -0.19    4.84
   2  23   2    2.24    4.74
   2  23   2    3.94    5.85
  -2 -23  -3    1.56    3.27
  -2  23  -3    3.46    4.38
  -2  23  -3   -3.35    4.01
   2  23   3    1.01    4.50
  -2 -23  -4    1.26    3.22
  -2  23  -4   -0.43    4.23
   2  23   4   -1.98    4.71
  -2 -23  -5    1.79    3.77
   2  23   5    3.53    5.50
  -2  24   5   -3.04    3.98
   2 -24  -5   -2.26    3.64
  -2 -24   4   13.00    5.79
  -2  24   4   20.46    7.11
   2 -24  -4   11.80    5.44
  -2 -24   3    8.36    5.18
  -2  24   3    5.09    5.04
   2 -24  -3    9.94    5.20
  -2 -24   2   19.34    6.34
  -2  24   2   11.78    5.91
   2 -24  -2   20.40    6.09
  -2 -24   1    0.62    3.84
  -2  24   1   -0.40    4.35
   2 -24  -1   -1.25    3.11
   2 -24  -1   -1.42    4.13
   2  24  -1   -0.06    4.60
  -2 -24   0   14.36    5.65
  -2  24   0   22.52    6.94
   2 -24   0   21.88    6.01
   2 -24   0   25.66    6.68
   2  24   0   34.72    7.66
   2  24   0   25.50    8.17
  -2 -24  -1    3.42    4.13
  -2  24  -1    3.38    5.00
   2  24   1    2.68    4.47
   2  24   1   -2.32    5.56
  -2 -24  -2    8.53    4.88
  -2  24  -2   15.66    6.09
   2  24   2   10.68    6.43
  -2 -24  -3    4.24    3.78
  -2  24  -3    5.64    5.05
   2  24   3   11.00    6.16
  -2 -24  -4    3.47    3.67
  -2  24  -4    1.20    4.59
   2  24   4    2.66    5.06
  -2 -25   3    7.45    5.60
  -2  25   3   19.46    7.22
   2 -25  -3    8.10    5.12
  -2 -25   2    4.64    4.90
  -2  25   2    5.13    5.08
   2 -25  -2    3.77    4.39
  -2 -25   1   -1.70    3.65
  -2  25   1    1.28    4.68
   2 -25  -1   -0.14    3.75
   2  25  -1    6.66    5.52
  -2 -25   0    5.21    4.87
  -2  25   0    1.73    4.62
   2 -25   0    5.40    4.59
   2  25   0    9.33    6.10
  -2 -25  -1   17.22    6.05
  -2  25  -1   14.19    6.00
   2  25   1   16.08    6.95
  -2 -25  -2   17.56    6.21
  -2  25  -2   24.67    7.30
   2  25   2   32.06    8.36
   3   0 -13   -4.01    3.93
   3   0 -12   -1.63    3.58
   3   0 -11   -2.20    2.89
  -3   0  10   20.11    4.88
   3   0 -10    9.57    3.42
   3   0 -10    8.09    3.87
  -3   0   9   10.44    3.71
   3   0  -9   14.16    3.84
   3   0  -9    1.94    2.70
  -3   0   8  124.27    8.05
  -3   0   8  118.94    7.77
   3   0  -8   45.22    5.25
  -3   0   7   14.44    3.34
  -3   0   7   14.55    3.27
   3   0  -7    6.29    2.60
  -3   0   6  598.21   14.48
  -3   0   6  583.14   14.23
  -3   0   6  389.48    7.37
   3   0  -6  343.37   10.51
  -3   0   5   52.39    4.59
  -3   0   5   52.83    4.34
  -3   0   5   40.27    2.27
   3   0  -5   43.47    3.68
  -3   0   4  192.72    7.29
  -3   0   4  155.85    3.79
   3   0  -4  188.84    6.41
  -3   0   3  231.26    7.42
  -3   0   3  171.26    4.00
   3   0  -3  259.16    6.78
  -3   0   2  502.34   10.03
  -3   0   2  351.07    7.25
  -3   0   2  267.62    5.49
  -3   0   1   20.17    2.11
  -3   0   1    0.27    0.41
  -3   0   1   14.62    1.64
  -3   0   0 1606.98   15.46
  -3   0   0 1115.04   13.85
  -3   0   0 1524.86   16.70
  -3   0  -1   68.43    2.97
  -3   0  -1   52.47    3.38
  -3   0  -1   69.36    4.01
  -3   0  -2   69.87    2.78
  -3   0  -2   53.82    3.88
  -3   0  -2   69.14    4.43
  -3   0  -3   25.51    3.28
  -3   0  -3   25.66    1.78
  -3   0  -3   16.38    2.76
  -3   0  -3   27.43    3.43
  -3   0  -4   38.13    3.98
  -3   0  -4   38.14    2.09
  -3   0  -4   24.02    3.58
  -3   0  -4   42.93    4.23
  -3   0  -5   13.23    3.18
  -3   0  -5    8.64    2.75
  -3   0  -5   13.91    3.21
  -3   0  -6   46.33    5.29
  -3   0  -6   28.30    4.53
  -3   0  -6   46.89    5.36
  -3   0  -7    1.26    2.42
  -3   0  -7   -0.05    2.31
  -3   0  -7    2.66    2.69
  -3   0  -8  413.05   15.75
  -3   0  -8  261.50   13.21
  -3   0  -8  424.88   16.15
  -3   0  -9   21.86    5.22
  -3   0  -9   14.61    4.57
  -3   0 -10    0.22    3.21
  -3   0 -10    0.24    2.69
   3   0  10   -1.93    4.79
  -3   0 -11    2.75    3.83
  -3   0 -11   -0.17    3.21
   3  -1 -13    3.14    4.82
   3   1 -13    1.05    4.56
   3  -1 -12    5.30    4.41
   3   1 -12   10.81    5.20
   3  -1 -11    2.08    3.47
   3   1 -11   -1.91    3.14
  -3  -1  10   18.50    4.61
  -3   1  10   18.12    4.70
   3  -1 -10   15.93    4.62
   3  -1 -10    5.95    3.65
   3   1 -10    3.86    2.72
   3   1 -10    4.45    3.43
  -3  -1   9   77.72    7.11
  -3   1   9   72.88    6.88
   3  -1  -9   81.03    7.05
   3  -1  -9   36.59    5.34
   3   1  -9   30.35    5.13
  -3  -1   8  185.78    9.46
  -3  -1   8  191.27    9.46
  -3   1   8  201.25    9.86
   3  -1  -8  206.10    9.88
   3  -1  -8   83.10    6.51
   3   1  -8   92.00    7.03
  -3  -1   7   92.00    6.49
  -3  -1   7   83.18    6.16
  -3   1   7   75.79    6.17
  -3   1   7   79.24    6.05
   3  -1  -7   41.54    4.45
   3   1  -7   41.04    4.68
  -3  -1   6   41.99    4.46
  -3  -1   6   41.05    4.34
  -3  -1   6   31.59    2.05
  -3   1   6   48.83    4.86
  -3   1   6   42.31    4.50
  -3   1   6   25.35    2.40
   3  -1  -6   22.85    3.27
   3   1  -6   26.75    3.64
  -3  -1   5  454.21   11.88
  -3  -1   5  462.91   11.93
  -3  -1   5  386.02    5.52
  -3   1   5  472.32   12.23
  -3   1   5  465.56   12.16
  -3   1   5  328.92    6.89
   3  -1  -5  318.09    8.87
   3   1  -5  412.04   10.77
  -3  -1   4  318.66    9.30
  -3  -1   4  195.13    3.38
  -3   1   4  295.53    9.06
  -3   1   4  217.54    5.29
   3  -1  -4  309.74    7.79
   3   1  -4  300.32    8.41
  -3  -1   3 1077.23   15.91
  -3  -1   3  649.24    7.11
  -3   1   3 1180.73   16.69
  -3   1   3  930.15   10.71
   3  -1  -3 1333.23   14.42
   3   1  -3 1317.55   16.09
  -3  -1   2  184.07    6.19
  -3  -1   2  135.19    4.86
  -3  -1   2  166.83    4.07
  -3   1   2  200.26    6.40
  -3   1   2  143.03    4.30
  -3   1   2  159.01    4.60
  -3  -1   1  170.67    5.58
  -3  -1   1  122.73    4.60
  -3  -1   1  163.60    4.74
  -3   1   1  233.58    6.30
  -3   1   1  154.97    4.51
  -3  -1   0  121.98    4.79
  -3  -1   0  179.13    5.68
  -3   1   0  139.60    4.42
  -3   1   0    0.77    0.44
  -3   1   0  125.19    4.95
  -3  -1  -1  263.38    6.08
  -3  -1  -1  202.99    6.68
  -3  -1  -1  277.02    7.83
  -3   1  -1  299.83    5.72
  -3   1  -1  208.04    6.44
  -3   1  -1  273.17    7.88
  -3  -1  -2  118.09    3.98
  -3  -1  -2   93.24    5.07
  -3  -1  -2  125.11    5.85
  -3   1  -2  130.49    3.32
  -3   1  -2   89.95    4.85
  -3   1  -2  122.32    5.85
  -3  -1  -3   88.52    5.42
  -3  -1  -3   88.09    3.48
  -3  -1  -3   68.26    4.76
  -3  -1  -3   94.78    5.62
  -3   1  -3   68.69    4.80
  -3   1  -3   83.07    2.33
  -3   1  -3   55.33    4.24
  -3   1  -3   81.79    5.28
  -3  -1  -4  111.45    6.46
  -3  -1  -4  101.09    3.78
  -3  -1  -4   74.83    5.51
  -3  -1  -4  113.63    6.68
  -3   1  -4  115.64    6.64
  -3   1  -4   73.48    5.35
  -3   1  -4  114.65    6.59
  -3  -1  -5  168.95    8.55
  -3  -1  -5  123.64    7.47
  -3  -1  -5  174.25    8.70
  -3   1  -5  172.22    8.54
  -3   1  -5  114.79    7.17
  -3   1  -5  170.82    8.52
  -3  -1  -6   24.06    4.21
  -3  -1  -6   10.08    3.31
  -3  -1  -6   22.75    4.17
  -3   1  -6   18.81    3.75
  -3   1  -6   12.50    3.42
  -3   1  -6   21.01    3.97
  -3  -1  -7   57.58    6.07
  -3  -1  -7   34.46    5.28
  -3  -1  -7   58.58    6.15
  -3   1  -7   63.95    6.48
  -3   1  -7   34.09    5.27
  -3   1  -7   66.62    6.57
  -3  -1  -8   67.75    7.02
  -3  -1  -8   40.52    6.07
  -3   1  -8   64.32    7.04
  -3   1  -8   41.75    6.17
  -3   1  -8   61.35    6.96
  -3  -1  -9  162.08   10.80
  -3  -1  -9   96.62    8.89
  -3   1  -9  139.70   10.18
  -3   1  -9   95.38    8.84
  -3   1  -9  163.70   10.97
   3   1   9  225.94   13.16
  -3  -1 -10    3.72    3.09
  -3  -1 -10    4.24    3.29
  -3   1 -10    9.46    4.38
  -3   1 -10    1.20    2.76
   3   1  10   12.29    5.95
  -3  -1 -11    4.18    3.86
  -3  -1 -11    3.13    4.36
  -3   1 -11    8.62    4.60
  -3   1 -11    4.38    4.55
   3  -2 -13   22.38    6.58
   3   2 -13   26.04    7.13
   3  -2 -12    6.60    4.48
   3   2 -12    8.52    4.67
  -3   2  11   -2.48    3.47
   3  -2 -11   -2.24    3.02
   3   2 -11    2.88    3.93
  -3  -2  10   15.61    4.54
  -3   2  10   11.46    4.25
   3  -2 -10   17.85    4.42
   3  -2 -10   11.67    4.07
   3   2 -10    6.09    3.82
  -3  -2   9   89.93    7.29
  -3  -2   9   84.89    6.99
  -3   2   9   92.49    7.83
   3  -2  -9   81.97    7.28
   3  -2  -9   46.17    5.67
   3   2  -9   32.91    5.24
  -3  -2   8  135.96    8.32
  -3  -2   8  122.96    7.78
  -3   2   8  120.68    8.04
   3  -2  -8  148.42    8.51
   3  -2  -8   57.82    5.49
   3   2  -8   50.59    5.75
  -3  -2   7  385.67   12.32
  -3  -2   7  365.08   11.95
  -3   2   7  404.57   13.05
  -3   2   7  297.98    8.39
   3  -2  -7  422.88   13.23
   3  -2  -7  163.78    7.77
   3   2  -7  227.41    9.90
  -3  -2   6   25.32    3.63
  -3  -2   6   26.73    3.64
  -3   2   6   18.14    3.40
  -3   2   6   12.34    1.99
   3  -2  -6    7.70    2.27
   3   2  -6   13.75    2.85
  -3  -2   5  511.57   12.55
  -3  -2   5  493.57   12.36
  -3   2   5  514.11   12.90
  -3   2   5  513.13   12.92
  -3   2   5  346.72    7.81
   3  -2  -5  294.40    8.22
   3   2  -5  476.34   11.99
  -3  -2   4 1125.96   17.49
  -3   2   4 1273.45   18.88
  -3   2   4  935.89   12.20
   3  -2  -4  987.22   13.12
   3   2  -4 1347.78   18.47
  -3  -2   3  917.37   14.87
  -3  -2   3  865.35    8.45
  -3   2   3 1028.27   15.79
  -3   2   3  779.25   10.79
   3  -2  -3 1146.02   12.46
   3   2  -3 1114.19   15.59
  -3  -2   2  102.38    4.82
  -3  -2   2   84.33    4.13
  -3  -2   2  107.31    3.17
  -3   2   2  126.25    5.21
  -3   2   2   84.99    3.04
  -3   2   2   92.22    3.85
  -3  -2   1  167.86    5.73
  -3  -2   1  123.82    4.90
  -3  -2   1  172.02    4.83
  -3   2   1  183.11    5.63
  -3   2   1  111.59    3.55
  -3   2   1  146.11    5.09
  -3  -2   0   88.03    3.96
  -3  -2   0   65.36    3.71
  -3  -2   0   95.17    4.20
  -3   2   0  127.77    4.26
  -3   2   0   85.58    3.55
  -3   2   0  104.90    4.64
  -3  -2  -1  158.41    5.10
  -3  -2  -1  121.99    5.37
  -3  -2  -1  167.39    6.21
  -3   2  -1  192.25    4.48
  -3   2  -1  109.83    4.62
  -3   2  -1  158.04    6.18
  -3  -2  -2    9.17    1.48
  -3  -2  -2    9.05    2.09
  -3  -2  -2    8.26    2.03
  -3   2  -2   13.56    1.22
  -3   2  -2    6.35    1.78
  -3   2  -2   11.10    2.18
  -3  -2  -3  223.99    8.52
  -3  -2  -3  204.79    5.79
  -3  -2  -3  167.34    7.41
  -3  -2  -3  239.01    8.82
  -3   2  -3  236.46    8.71
  -3   2  -3  150.31    6.93
  -3   2  -3  255.43    9.03
  -3  -2  -4  122.29    6.90
  -3  -2  -4  107.15    4.36
  -3  -2  -4   97.83    6.25
  -3  -2  -4  128.51    7.09
  -3   2  -4  114.06    6.56
  -3   2  -4   76.01    5.46
  -3   2  -4  117.75    6.75
  -3  -2  -5   70.59    5.76
  -3  -2  -5   48.22    4.95
  -3  -2  -5   73.56    6.07
  -3   2  -5   57.12    5.25
  -3   2  -5   37.75    4.46
  -3   2  -5   56.95    5.27
  -3  -2  -6   32.16    4.65
  -3  -2  -6   17.65    3.89
  -3  -2  -6   29.87    4.76
  -3   2  -6   32.48    4.72
  -3   2  -6   14.76    3.66
  -3   2  -6   33.64    4.83
  -3  -2  -7   89.99    7.44
  -3  -2  -7   60.68    6.23
  -3   2  -7   86.38    7.26
  -3   2  -7   57.11    6.48
  -3   2  -7   90.74    7.41
  -3  -2  -8  134.78    9.46
  -3  -2  -8   88.94    8.09
  -3   2  -8  142.21    9.62
  -3   2  -8   78.16    7.82
  -3   2  -8  143.17    9.70
   3   2   8  220.47   12.12
  -3  -2  -9   55.31    7.27
  -3  -2  -9   31.78    5.86
  -3   2  -9   44.15    6.61
  -3   2  -9   30.98    6.22
  -3   2  -9   52.08    7.09
   3   2   9   69.03    8.56
  -3  -2 -10    1.46    2.81
  -3  -2 -10    1.08    2.87
  -3   2 -10    2.06    3.32
  -3   2 -10    0.69    3.13
  -3   2 -10    2.35    4.05
   3   2  10   -1.54    4.63
  -3  -2 -11    1.94    3.81
  -3  -2 -11    4.88    4.48
  -3   2 -11    3.25    4.16
  -3   2 -11    3.84    4.32
   3   2  11   13.71    7.04
  -3  -2 -12    9.55    5.11
   3   3 -13   15.23    6.29
   3  -3 -12   31.22    6.51
   3   3 -12   19.34    5.99
   3  -3 -11    1.35    3.46
   3   3 -11   -2.44    3.14
  -3  -3  10   76.65    7.20
  -3  -3  10   76.34    7.38
  -3   3  10   84.86    7.93
   3  -3 -10   78.72    7.62
   3  -3 -10   38.57    5.75
   3   3 -10   29.54    5.71
  -3  -3   9   73.99    6.80
  -3  -3   9   75.45    6.75
  -3   3   9   71.80    7.05
   3  -3  -9   78.83    7.18
   3  -3  -9   40.19    5.45
   3   3  -9   26.53    4.97
  -3  -3   8  440.80   13.97
  -3  -3   8  427.28   13.63
  -3   3   8  467.49   15.04
   3  -3  -8  461.23   14.86
   3  -3  -8  196.89    9.17
   3   3  -8  225.64   10.79
  -3  -3   7   88.18    6.45
  -3  -3   7   81.05    6.08
  -3   3   7  100.27    7.16
  -3   3   7   66.22    4.43
   3  -3  -7   98.24    6.80
   3  -3  -7   40.85    4.25
   3   3  -7   64.00    5.76
  -3  -3   6   36.72    4.16
  -3  -3   6   38.19    4.03
  -3   3   6   44.69    4.99
  -3   3   6   35.37    3.20
   3  -3  -6   45.52    4.53
   3  -3  -6   19.79    2.92
   3   3  -6   40.64    4.36
  -3  -3   5  150.72    7.12
  -3  -3   5  134.67    6.72
  -3   3   5  142.52    7.12
  -3   3   5   98.80    4.63
   3  -3  -5  167.87    7.63
   3  -3  -5   69.07    4.07
   3   3  -5  149.87    7.04
  -3  -3   4 1112.37   17.64
  -3   3   4  863.73   12.79
   3  -3  -4  766.01   10.92
   3   3  -4 1286.15   18.77
  -3  -3   3  292.93    8.62
  -3   3   3  341.42    9.41
  -3   3   3  248.44    6.66
   3  -3  -3  345.13    6.19
   3   3  -3  374.68    9.53
  -3  -3   2  145.68    5.84
  -3  -3   2  127.47    5.30
  -3   3   2  174.36    6.21
  -3   3   2   41.93    2.84
  -3  -3   1   44.31    3.16
  -3  -3   1   30.99    2.69
  -3  -3   1   47.71    2.74
  -3   3   1   34.87    2.75
  -3   3   1   21.10    1.53
  -3   3   1   26.61    2.49
  -3  -3   0  188.60    6.10
  -3  -3   0  150.87    5.80
  -3  -3   0  203.91    6.19
  -3   3   0  237.19    5.85
  -3   3   0  147.46    4.47
  -3   3   0  189.07    6.48
  -3  -3  -1   89.94    4.81
  -3  -3  -1  126.48    5.49
  -3   3  -1   40.87    2.86
  -3   3  -1   85.72    4.70
  -3  -3  -2   69.62    3.75
  -3  -3  -2   54.50    4.08
  -3  -3  -2   84.35    5.00
  -3   3  -2   54.12    3.85
  -3   3  -2   69.41    4.55
   3  -3   2   88.48    2.52
  -3  -3  -3  540.94   13.33
  -3  -3  -3  466.20    9.54
  -3  -3  -3  402.24   11.52
  -3  -3  -3  582.86   13.85
  -3   3  -3  485.08   12.52
  -3   3  -3  325.55    9.93
  -3   3  -3  509.52   12.86
  -3  -3  -4  346.75   11.59
  -3  -3  -4  260.87    7.37
  -3  -3  -4  245.08    9.72
  -3  -3  -4  347.11   11.56
  -3   3  -4  322.08   10.98
  -3   3  -4  191.40    8.45
  -3   3  -4  326.82   11.05
  -3  -3  -5  184.56    9.08
  -3  -3  -5  136.58    5.63
  -3  -3  -5  124.85    7.60
  -3   3  -5  175.21    8.75
  -3   3  -5  105.83    7.01
  -3   3  -5  179.42    8.86
  -3  -3  -6    6.00    2.71
  -3  -3  -6    0.60    1.76
  -3   3  -6    3.82    2.46
  -3   3  -6    2.56    2.47
  -3   3  -6    2.62    2.27
   3   3   6    4.81    3.50
  -3  -3  -7   26.01    4.86
  -3  -3  -7   19.27    4.28
  -3   3  -7   31.41    4.88
  -3   3  -7   18.51    4.41
  -3   3  -7   28.38    4.97
   3   3   7   50.54    6.79
  -3  -3  -8  194.21   11.37
  -3  -3  -8  120.06    9.11
  -3   3  -8  200.64   11.12
  -3   3  -8  106.33    8.99
  -3   3  -8  181.43   10.77
   3   3   8  286.38   13.95
  -3  -3  -9    3.43    3.11
  -3  -3  -9    4.23    3.21
  -3   3  -9    4.08    3.26
  -3   3  -9    2.19    3.35
  -3   3  -9    6.23    4.10
   3   3   9    4.02    4.64
  -3  -3 -10    3.14    3.41
  -3  -3 -10    4.41    3.47
  -3   3 -10    1.97    3.47
  -3   3 -10    1.70    3.52
  -3   3 -10    4.47    4.28
   3   3  10    8.43    5.99
  -3  -3 -11    5.44    4.14
  -3  -3 -11    6.82    4.56
  -3   3 -11    0.45    3.91
   3   3  11    9.43    6.50
  -3  -3 -12   20.27    6.32
   3   4 -13   -0.63    4.96
   3   4 -12   12.26    5.32
   3  -4 -11   12.21    4.59
   3  -4 -11   13.81    4.53
   3  -4 -11    7.13    4.13
   3   4 -11    3.94    3.97
   3  -4 -10   59.69    6.99
   3  -4 -10   32.07    5.35
   3   4 -10   17.58    4.79
  -3  -4   9  276.60   11.77
  -3  -4   9  263.94   11.47
  -3   4   9  326.58   13.62
   3  -4  -9  258.58   12.01
   3  -4  -9  125.82    8.06
  -3  -4   8   56.51    5.99
  -3  -4   8   55.16    5.66
  -3   4   8   57.23    6.35
   3  -4  -8   60.33    6.19
   3  -4  -8   31.20    4.42
   3   4  -8   26.58    4.65
  -3  -4   7   95.76    6.55
  -3  -4   7   94.92    6.39
  -3   4   7   97.71    7.16
  -3   4   7   74.83    4.92
   3  -4  -7  101.82    7.02
   3  -4  -7   50.13    4.47
   3   4  -7   63.17    5.88
  -3  -4   6  516.91   13.58
  -3  -4   6  479.81   13.06
  -3   4   6  550.05   14.80
  -3   4   6  342.11    9.56
   3  -4  -6  571.99   14.92
   3  -4  -6  242.82    8.02
   3   4  -6  403.30   12.67
  -3  -4   5  314.18   10.19
  -3  -4   5  298.27    9.88
  -3   4   5  400.01   11.88
  -3   4   5  240.94    7.63
   3  -4  -5  356.12   11.18
   3  -4  -5  144.51    5.46
   3   4  -5  368.49   11.30
  -3  -4   4   76.44    5.03
  -3   4   4  116.26    6.23
  -3   4   4   79.48    4.28
   3  -4  -4   97.92    5.64
   3  -4  -4   47.98    2.76
   3   4  -4  123.79    6.19
  -3  -4   3  552.18   12.08
  -3   4   3   -0.34    0.39
   3  -4  -3  708.11   13.76
   3  -4  -3  461.76    6.44
   3   4  -3  710.43   13.64
   3   4  -3  738.95    7.53
  -3  -4   2   11.92    2.05
  -3  -4   2   12.75    2.14
  -3   4   2   17.47    2.13
   3  -4  -2   16.89    2.29
   3  -4  -2   20.82    1.28
   3   4  -2   23.27    1.82
  -3  -4   1  113.23    5.15
  -3  -4   1   81.53    4.42
  -3   4   1   79.86    2.53
  -3   4   1   99.69    4.72
   3  -4  -1  140.75    5.30
   3   4  -1  151.53    4.96
  -3  -4   0  244.40    7.35
  -3  -4   0  197.30    6.91
  -3   4   0  198.92    5.07
  -3   4   0  243.02    7.66
   3  -4   0  325.24    7.17
   3   4   0  385.79    8.85
  -3  -4  -1  125.94    5.26
  -3  -4  -1  102.21    5.30
  -3   4  -1   99.54    4.40
  -3   4  -1  133.50    6.01
   3  -4   1  153.60    4.36
  -3  -4  -2  381.22   10.60
  -3  -4  -2  317.80    8.33
  -3  -4  -2  268.10    8.95
  -3   4  -2  359.04   10.32
  -3   4  -2  228.54    7.51
  -3   4  -2  367.86   10.45
   3  -4   2  351.36    5.30
  -3  -4  -3  255.28    9.09
  -3  -4  -3  172.36    6.29
  -3  -4  -3  169.08    7.70
  -3   4  -3  228.89    8.79
  -3   4  -3  157.04    6.99
  -3   4  -3  235.58    8.93
  -3  -4  -4   46.27    4.61
  -3  -4  -4   35.47    3.11
  -3  -4  -4   34.10    3.90
  -3   4  -4   43.37    4.33
  -3   4  -4   27.11    3.68
  -3   4  -4   57.35    4.89
   3   4   4   68.76    5.83
  -3  -4  -5  507.25   15.15
  -3  -4  -5  320.70    9.17
  -3  -4  -5  358.81   12.80
  -3   4  -5  465.57   14.11
  -3   4  -5  279.93   11.21
  -3   4  -5  488.02   14.45
   3   4   5  727.42   18.14
  -3  -4  -6   27.15    4.51
  -3  -4  -6   17.53    3.79
  -3   4  -6   19.16    3.85
  -3   4  -6   13.89    3.72
  -3   4  -6   22.26    4.14
   3   4   6   27.40    5.25
  -3  -4  -7  116.20    8.55
  -3  -4  -7   75.12    7.04
  -3   4  -7  106.97    8.02
  -3   4  -7   55.36    6.28
  -3   4  -7  105.65    7.83
   3   4   7  154.88   10.17
  -3  -4  -8   10.18    3.78
  -3  -4  -8   11.46    3.95
  -3   4  -8   12.31    3.95
  -3   4  -8    7.02    3.77
  -3   4  -8   16.69    4.65
   3   4   8   18.34    5.62
  -3  -4  -9   72.84    7.76
  -3  -4  -9   44.72    6.74
  -3   4  -9   74.78    7.85
  -3   4  -9   38.31    6.88
  -3   4  -9   66.85    7.62
   3   4   9  112.89   10.28
  -3  -4 -10    3.25    3.30
  -3  -4 -10    2.12    3.46
  -3   4 -10    3.93    3.84
  -3   4 -10    0.14    3.87
  -3   4 -10    5.62    4.42
   3   4  10   11.19    6.16
  -3  -4 -11    5.09    4.15
  -3  -4 -11    1.04    4.24
  -3   4 -11    1.32    4.16
   3   4  11    3.18    6.20
   3   5 -12    8.81    4.92
   3  -5 -11   30.62    5.97
   3  -5 -11   21.82    5.43
   3   5 -11   10.81    4.89
   3  -5 -10   70.21    7.63
   3  -5 -10   74.78    7.69
   3  -5 -10   47.31    5.99
   3   5 -10   29.88    5.72
  -3  -5   9  118.98    8.19
  -3  -5   9  113.46    7.97
   3  -5  -9  116.05    8.68
   3  -5  -9  105.19    8.27
   3  -5  -9   56.68    5.73
   3   5  -9   53.29    6.43
  -3  -5   8   84.91    6.73
  -3  -5   8   97.07    7.03
  -3   5   8   72.27    5.41
   3  -5  -8   78.62    7.03
   3  -5  -8   50.22    4.88
   3   5  -8   48.33    5.94
  -3  -5   7   15.36    3.34
  -3  -5   7   18.52    3.55
  -3   5   7   24.79    4.41
  -3   5   7   17.12    3.09
  -3   5   7   11.67    2.72
   3  -5  -7   17.07    3.60
   3  -5  -7    9.05    2.62
   3   5  -7   18.08    3.74
  -3  -5   6  168.21    8.10
  -3  -5   6  158.53    7.86
  -3   5   6  195.74    9.35
  -3   5   6  127.77    6.36
   3  -5  -6  188.10    9.02
   3  -5  -6   92.06    5.01
   3   5  -6  156.46    8.28
  -3  -5   5  904.21   17.32
  -3  -5   5  886.96   17.11
  -3   5   5 1025.76   19.39
  -3   5   5  594.51   12.69
   3  -5  -5 1010.63   19.14
   3  -5  -5  511.85    9.63
   3   5  -5 1014.56   19.16
  -3  -5   4  301.31    9.70
  -3  -5   4  299.98    9.63
  -3   5   4  359.13   10.92
   3  -5  -4  330.92   10.38
   3  -5  -4  160.98    4.51
   3   5  -4  363.46   10.82
  -3  -5   3   45.16    3.91
  -3   5   3   44.64    3.46
   3  -5  -3   50.23    4.01
   3  -5  -3   26.05    1.46
   3   5  -3   67.40    4.59
   3   5  -3   62.80    2.40
  -3  -5   2    2.41    1.24
  -3  -5   2    1.64    1.15
  -3   5   2    2.38    1.27
   3  -5  -2    2.48    1.40
   3   5  -2    4.27    1.20
  -3  -5   1  171.05    6.61
  -3  -5   1  141.90    6.11
  -3   5   1  153.88    3.24
  -3   5   1  190.30    6.85
   3  -5  -1  218.81    6.84
   3   5  -1  302.97    7.28
  -3  -5   0 1234.93   17.38
  -3  -5   0 1073.14   16.73
  -3   5   0  945.71   11.03
  -3   5   0 1251.07   18.01
   3  -5   0 1452.48   15.99
   3   5   0 1930.73   20.52
  -3  -5  -1  276.05    8.25
  -3  -5  -1  245.65    8.33
  -3   5  -1  190.55    5.98
  -3   5  -1  287.66    9.07
   3  -5   1  300.65    6.46
   3   5   1  436.07   10.75
  -3  -5  -2  113.66    6.09
  -3  -5  -2   59.35    3.97
  -3  -5  -2   86.29    5.30
  -3   5  -2   99.20    5.68
  -3   5  -2   -0.66    0.52
  -3   5  -2  104.29    5.89
   3  -5   2   91.80    3.08
   3   5   2  149.97    6.99
  -3  -5  -3  318.29   10.43
  -3  -5  -3  217.28    7.54
  -3  -5  -3  229.59    9.03
  -3   5  -3  261.35    9.57
  -3   5  -3  171.33    7.40
  -3   5  -3  260.18    9.54
   3   5   3  427.25   12.52
  -3  -5  -4  289.23   10.90
  -3  -5  -4  198.80    7.43
  -3  -5  -4  221.23    9.48
  -3   5  -4  268.03   10.22
  -3   5  -4  161.42    7.94
  -3   5  -4  283.16   10.53
   3   5   4  418.34   13.29
  -3  -5  -5   66.51    5.91
  -3  -5  -5   41.89    3.67
  -3  -5  -5   44.23    4.83
  -3   5  -5   68.93    5.76
  -3   5  -5   38.17    4.82
  -3   5  -5   68.34    5.78
   3   5   5  107.02    7.66
  -3  -5  -6    7.81    2.96
  -3  -5  -6    9.65    3.28
  -3   5  -6    6.93    2.77
  -3   5  -6    7.74    3.24
  -3   5  -6    7.87    3.16
   3   5   6   14.70    4.60
  -3  -5  -7    0.94    2.21
  -3  -5  -7    2.75    2.47
  -3   5  -7    6.57    3.17
  -3   5  -7    4.14    3.02
  -3   5  -7    7.47    3.48
   3   5   7    7.82    4.52
  -3  -5  -8   69.01    7.11
  -3  -5  -8   52.37    6.51
  -3   5  -8   61.88    6.62
  -3   5  -8   37.92    6.30
  -3   5  -8   74.57    7.41
   3   5   8  106.04    9.45
  -3  -5  -9   18.89    4.97
  -3  -5  -9   15.09    4.55
  -3   5  -9   23.56    5.24
  -3   5  -9   13.45    5.01
  -3   5  -9   22.76    5.46
   3   5   9   29.23    6.72
  -3  -5 -10   15.28    5.07
  -3  -5 -10   13.90    4.91
  -3   5 -10   14.11    4.79
  -3   5 -10    7.52    4.90
  -3   5 -10   14.10    5.28
   3   5  10   23.71    7.35
  -3  -5 -11   14.41    5.68
   3   5  11   29.96    8.44
   3   5  12    7.49    6.81
   3   6 -12   -2.74    3.85
   3  -6 -11   10.63    4.73
   3  -6 -11    7.06    4.39
   3   6 -11    0.98    3.71
   3  -6 -10  130.59    9.72
   3  -6 -10  127.28    9.76
  -3  -6   9   72.73    6.83
  -3  -6   9   71.55    6.88
   3  -6  -9   54.33    6.74
   3  -6  -9   60.16    6.90
   3   6  -9   29.66    5.49
  -3  -6   8    8.67    3.26
  -3  -6   8   10.82    3.27
  -3   6   8    8.43    2.63
   3  -6  -8    5.40    3.24
   3  -6  -8   10.65    3.77
   3  -6  -8    7.37    2.68
   3   6  -8    9.44    3.71
  -3  -6   7   13.87    3.22
  -3  -6   7   13.84    3.23
  -3   6   7    9.66    2.75
  -3   6   7   11.82    2.83
   3  -6  -7   13.62    3.50
   3  -6  -7   11.13    3.42
   3  -6  -7    6.50    2.36
   3   6  -7   10.26    3.42
  -3  -6   6  101.75    6.60
  -3  -6   6  103.15    6.58
  -3   6   6   81.41    5.45
  -3   6   6   59.17    4.67
   3  -6  -6  117.28    7.54
   3  -6  -6   60.33    4.10
   3   6  -6  126.92    7.81
  -3  -6   5  541.19   13.73
  -3  -6   5  541.18   13.75
  -3   6   5  650.02   15.94
   3  -6  -5  589.39   15.04
   3  -6  -5  355.64    7.75
   3   6  -5  619.86   15.45
  -3  -6   4  524.27   13.04
  -3  -6   4  505.87   12.74
  -3   6   4  399.73   10.65
   3  -6  -4  595.29   14.27
   3  -6  -4  376.21    6.26
   3   6  -4  680.79   15.31
   3   6  -4  389.90    5.47
  -3  -6   3    4.26    1.78
  -3  -6   3    3.77    1.61
  -3   6   3    1.74    1.84
  -3   6   3    1.93    1.21
   3  -6  -3    2.66    1.61
   3   6  -3    2.31    1.70
   3   6  -3    3.23    1.01
  -3  -6   2  378.67   10.42
  -3  -6   2  327.30    9.70
  -3   6   2  319.91    9.25
   3  -6  -2  439.84   10.87
   3   6  -2  541.17    9.09
  -3  -6   1  429.90   10.89
  -3  -6   1  368.50   10.14
  -3   6   1  322.59    4.59
  -3   6   1  381.74   10.17
   3  -6  -1  496.31   10.71
   3   6  -1  622.24   11.00
  -3  -6   0  174.72    6.93
  -3  -6   0  155.69    6.72
  -3   6   0  144.26    4.33
  -3   6   0  190.84    7.39
   3  -6   0  191.45    6.18
   3   6   0  311.92    8.64
  -3  -6  -1  430.90   10.88
  -3  -6  -1  403.18   10.99
  -3   6  -1  469.44   11.94
  -3   6  -1  315.01    7.73
  -3   6  -1  464.44   11.89
   3  -6   1  468.26    8.65
   3   6   1  726.13   14.26
  -3  -6  -2  208.12    8.34
  -3  -6  -2  153.68    6.60
  -3  -6  -2  152.25    7.18
  -3   6  -2  190.36    7.99
  -3   6  -2  111.81    5.46
  -3   6  -2  182.95    7.86
   3  -6   2  141.86    4.22
   3   6   2  303.59   10.05
  -3  -6  -3   42.34    4.30
  -3  -6  -3    3.06    1.20
  -3  -6  -3   34.69    3.74
  -3   6  -3   51.04    4.51
  -3   6  -3   28.13    3.51
  -3   6  -3   44.86    4.39
   3  -6   3   40.57    1.84
   3   6   3   71.91    5.58
  -3  -6  -4  231.48    8.56
  -3  -6  -4  373.55   12.56
  -3  -6  -4  220.27    8.29
  -3  -6  -4  269.49   10.64
  -3   6  -4  361.12   12.11
  -3   6  -4  192.91    8.76
  -3   6  -4  354.69   12.00
   3   6   4  558.22   15.55
  -3  -6  -5   47.77    4.31
  -3  -6  -5   87.23    6.71
  -3  -6  -5   46.08    4.14
  -3  -6  -5   57.21    5.44
  -3   6  -5   87.12    6.51
  -3   6  -5   39.55    5.12
  -3   6  -5   72.79    6.03
   3   6   5  120.64    8.20
  -3  -6  -6    1.66    2.01
  -3  -6  -6    1.47    2.13
  -3   6  -6    3.32    2.61
  -3   6  -6    4.19    2.87
  -3   6  -6    2.78    2.35
   3   6   6    6.21    4.03
  -3  -6  -7    7.51    3.19
  -3  -6  -7    5.84    2.96
  -3   6  -7   13.18    3.84
  -3   6  -7    3.55    3.20
  -3   6  -7   12.99    3.96
   3   6   7   13.01    4.70
  -3  -6  -8   11.04    4.11
  -3  -6  -8    5.81    3.34
  -3   6  -8   12.55    4.08
  -3   6  -8    7.34    3.95
  -3   6  -8   12.24    4.28
   3   6   8   16.04    5.45
  -3  -6  -9    6.86    3.89
  -3  -6  -9    3.54    3.17
  -3   6  -9    6.45    3.73
  -3   6  -9    4.01    3.60
  -3   6  -9    3.77    3.79
   3   6   9   14.07    6.11
  -3  -6 -10    5.30    4.04
  -3   6 -10    6.15    4.49
  -3   6 -10    4.01    4.41
   3   6  10    7.97    5.99
  -3  -6 -11   10.35    5.37
   3   6  11    6.60    6.30
   3   6  11    6.23    6.97
   3   6  12   34.20    9.02
   3   7 -12    0.10    4.06
   3  -7 -11    4.60    4.28
   3  -7 -11    5.36    4.25
   3   7 -11    3.12    3.71
   3  -7 -10    9.51    4.33
   3  -7 -10   11.18    4.43
   3   7 -10    3.54    3.70
  -3  -7   9   67.92    6.90
  -3  -7   9   75.56    6.88
   3  -7  -9   64.35    7.25
   3  -7  -9   69.12    7.37
   3   7  -9   37.53    6.15
  -3  -7   8   28.40    4.59
  -3  -7   8   34.96    4.87
  -3   7   8   26.42    4.08
  -3   7   8   27.70    4.44
   3  -7  -8   29.22    5.10
   3  -7  -8   31.69    5.05
   3   7  -8   21.14    4.79
  -3  -7   7   40.68    4.92
  -3  -7   7   40.78    4.84
   3  -7  -7   44.38    5.36
   3  -7  -7   47.02    5.42
   3  -7  -7   32.18    3.65
   3   7  -7   38.18    5.25
  -3  -7   6   66.58    5.60
  -3  -7   6   65.66    5.42
  -3   7   6   34.01    3.89
  -3   7   6   44.04    4.31
   3  -7  -6   63.88    5.92
   3  -7  -6   66.85    6.04
   3  -7  -6   40.42    3.42
   3   7  -6   53.46    5.42
  -3  -7   5  273.58   10.16
  -3  -7   5  280.66   10.23
  -3   7   5  217.95    8.64
  -3   7   5  215.06    8.57
   3  -7  -5  280.47   10.84
   3  -7  -5  302.44   11.20
   3  -7  -5  201.79    5.62
   3   7  -5  343.74   11.96
  -3  -7   4  127.10    6.76
  -3  -7   4  119.38    6.64
  -3   7   4   92.98    5.63
  -3   7   4   90.10    5.53
   3  -7  -4  138.65    7.35
   3  -7  -4  127.59    7.04
   3  -7  -4  102.64    3.01
   3   7  -4  153.27    7.75
   3   7  -4  121.56    3.71
  -3  -7   3   73.97    5.20
  -3  -7   3   69.68    4.93
  -3   7   3   47.09    4.06
  -3   7   3   50.43    4.08
   3  -7  -3   79.19    5.43
   3  -7  -3   78.96    5.27
   3   7  -3   70.60    5.21
   3   7  -3   62.60    3.11
  -3  -7   2  266.54    9.17
  -3  -7   2  262.31    9.05
  -3  -7   2  241.76    8.76
  -3   7   2  248.41    8.65
  -3   7   2  249.72    8.63
   3  -7  -2  288.89    9.19
   3   7  -2  387.98    8.33
  -3  -7   1  159.52    7.05
  -3  -7   1  159.83    7.02
  -3  -7   1  159.05    6.97
  -3   7   1  158.68    7.05
  -3   7   1  132.88    2.89
  -3   7   1  159.42    7.03
   3  -7  -1  170.26    6.67
   3   7  -1  265.07    7.70
  -3  -7   0   19.99    2.85
  -3  -7   0   21.09    2.87
  -3  -7   0   18.61    2.82
  -3   7   0   62.75    3.45
  -3   7   0   20.46    1.99
  -3   7   0   26.50    3.26
   3  -7   0   23.00    2.59
   3   7   0   43.92    3.77
  -3  -7  -1  603.85   13.60
  -3  -7  -1  585.76   13.35
  -3  -7  -1  581.65   13.62
  -3   7  -1  708.07   15.21
  -3   7  -1  426.50    9.11
  -3   7  -1  680.48   14.89
   3  -7   1  623.39   10.72
   3   7   1 1100.13   18.31
   3   7   1 1081.08   18.04
  -3  -7  -2   38.31    3.81
  -3  -7  -2   58.29    4.76
  -3  -7  -2   44.01    3.92
  -3  -7  -2   45.07    4.13
  -3   7  -2   43.00    4.12
  -3   7  -2   26.54    3.14
  -3   7  -2   40.24    4.00
   3  -7   2   40.26    2.64
   3   7   2   65.94    5.18
  -3  -7  -3   28.88    3.51
  -3  -7  -3   53.87    4.86
  -3  -7  -3   32.80    3.52
  -3  -7  -3   34.36    3.87
  -3   7  -3   45.25    4.42
  -3   7  -3   20.47    3.17
  -3   7  -3   50.26    4.69
   3  -7   3   37.91    2.19
   3   7   3   62.76    5.44
  -3  -7  -4    0.01    1.08
  -3  -7  -4   60.41    5.49
  -3  -7  -4    0.73    0.85
  -3  -7  -4   43.30    4.67
  -3   7  -4   47.38    4.87
  -3   7  -4   29.14    4.09
  -3   7  -4   49.18    5.05
   3   7   4   86.22    6.77
  -3  -7  -5  180.59    8.26
  -3  -7  -5  392.55   14.13
  -3  -7  -5  173.89    8.01
  -3  -7  -5  269.38   11.53
  -3   7  -5  373.30   13.16
  -3   7  -5  175.57    9.35
  -3   7  -5  368.85   13.16
   3   7   5  606.06   17.70
  -3  -7  -6    9.92    3.23
  -3  -7  -6    2.94    1.85
  -3  -7  -6    6.57    2.86
  -3   7  -6    8.66    3.14
  -3   7  -6    2.31    2.83
  -3   7  -6    8.53    3.36
   3   7   6   11.53    4.57
  -3  -7  -7   53.16    6.35
  -3  -7  -7   36.30    5.52
  -3   7  -7   48.44    6.15
  -3   7  -7   21.57    5.01
  -3   7  -7   41.55    5.81
   3   7   7   62.20    7.56
  -3  -7  -8   15.25    4.53
  -3   7  -8   21.63    4.87
  -3   7  -8    8.46    4.19
  -3   7  -8   24.52    5.19
   3   7   8   33.05    6.93
  -3  -7  -9   46.40    6.94
  -3   7  -9   54.07    7.19
  -3   7  -9   27.10    6.19
  -3   7  -9   53.67    7.24
   3   7   9   88.40    9.83
  -3  -7 -10   -0.43    3.34
  -3   7 -10    2.03    3.68
   3   7  10   12.17    6.13
   3   7  10    7.13    5.82
  -3  -7 -11   -2.19    4.15
   3   7  11   -0.13    5.97
   3   7  11   -2.97    6.07
   3  -8 -12   18.91    6.15
   3   8 -12   12.97    5.69
   3  -8 -11   24.26    5.87
   3  -8 -11   18.77    5.47
   3   8 -11    7.84    4.55
   3  -8 -10    2.16    3.84
   3  -8 -10    6.61    4.02
   3   8 -10    4.07    3.81
  -3  -8   9   68.74    6.75
   3  -8  -9   58.42    7.06
   3  -8  -9   65.51    7.07
   3   8  -9   40.02    6.26
  -3  -8   8  102.75    7.72
  -3  -8   8   96.25    7.27
   3  -8  -8   95.01    8.06
   3  -8  -8   88.91    7.69
   3   8  -8   68.78    6.97
  -3  -8   7   87.41    6.67
  -3  -8   7   79.05    6.38
  -3   8   7   64.74    5.50
  -3   8   7   54.11    5.41
   3  -8  -7   84.48    7.25
   3  -8  -7   83.67    7.15
   3   8  -7   69.08    6.54
  -3  -8   6   17.91    3.57
  -3  -8   6   21.35    3.60
  -3   8   6   15.28    3.24
  -3   8   6   20.92    3.58
   3  -8  -6   21.38    4.02
   3  -8  -6   22.47    4.18
   3   8  -6   24.61    4.63
  -3  -8   5    0.00    1.55
  -3  -8   5    0.65    1.58
  -3   8   5    2.05    1.41
  -3   8   5    2.77    1.58
   3  -8  -5   -0.35    1.52
   3  -8  -5    1.42    1.91
   3  -8  -5    0.90    0.97
   3   8  -5    0.84    1.65
  -3  -8   4  142.43    7.40
  -3  -8   4  139.55    7.25
  -3   8   4  106.20    6.21
  -3   8   4   90.56    5.76
   3  -8  -4  140.51    7.61
   3  -8  -4  143.33    7.65
   3  -8  -4  118.10    2.99
   3   8  -4  167.76    8.30
   3   8  -4  130.51    4.38
  -3  -8   3  490.67   13.10
  -3  -8   3  474.85   12.87
  -3   8   3  405.68   11.67
  -3   8   3  410.22   11.75
   3  -8  -3  501.00   13.33
   3  -8  -3  491.58   13.15
   3   8  -3  659.63   15.38
   3   8  -3  554.24    9.65
  -3  -8   2   31.77    3.61
  -3  -8   2   26.55    3.27
  -3  -8   2   31.37    3.52
  -3   8   2   26.32    3.48
  -3   8   2   18.29    2.97
   3  -8  -2   26.71    3.34
   3  -8  -2   26.55    3.22
   3   8  -2   40.42    3.26
  -3  -8   1   65.39    4.85
  -3  -8   1   59.21    4.58
  -3  -8   1   59.39    4.56
  -3   8   1   61.99    4.82
  -3   8   1   44.52    1.83
  -3   8   1   65.83    4.82
   3  -8  -1   64.37    4.40
   3   8  -1   99.89    5.25
  -3  -8   0  227.42    8.82
  -3  -8   0  217.18    8.51
  -3  -8   0  214.53    8.47
  -3   8   0  226.81    8.66
  -3   8   0  134.38    4.43
  -3   8   0  225.72    8.77
   3  -8   0  229.35    7.57
   3   8   0  352.73   10.10
  -3  -8  -1   50.92    4.43
  -3  -8  -1   45.59    4.08
  -3  -8  -1   52.61    4.52
  -3   8  -1   49.50    4.45
  -3   8  -1   34.10    3.04
  -3   8  -1   50.17    4.47
   3  -8   1   52.88    3.59
   3   8   1   78.85    5.60
   3   8   1   81.09    5.46
  -3  -8  -2   34.29    3.75
  -3  -8  -2   37.41    3.91
  -3  -8  -2   40.70    4.14
  -3   8  -2   46.15    4.41
  -3   8  -2   26.18    3.15
  -3   8  -2   50.13    4.65
   3  -8   2   34.47    2.71
   3   8   2   78.19    5.92
   3   8   2   86.55    6.02
  -3  -8  -3   17.60    2.99
  -3  -8  -3   17.03    2.85
  -3  -8  -3   19.74    3.36
  -3   8  -3   19.94    3.47
  -3   8  -3   -1.10    0.77
  -3   8  -3   17.58    3.37
   3  -8   3   20.74    2.04
   3   8   3   36.96    4.80
  -3  -8  -4  156.01    7.75
  -3  -8  -4  154.17    7.71
  -3  -8  -4  232.19   10.27
  -3   8  -4  260.63   10.79
  -3   8  -4  124.90    7.43
  -3   8  -4  269.07   11.00
   3   8   4  431.05   14.39
  -3  -8  -5    0.86    1.22
  -3  -8  -5    0.02    1.04
  -3  -8  -5   86.34    6.84
  -3   8  -5  105.80    7.50
  -3   8  -5   54.52    5.86
  -3   8  -5  116.55    7.88
   3   8   5  194.75   10.76
  -3  -8  -6    6.79    2.55
  -3  -8  -6    7.74    2.57
  -3  -8  -6   18.36    4.13
  -3   8  -6   19.75    4.20
  -3   8  -6   10.56    3.81
  -3   8  -6   19.71    4.26
   3   8   6   35.82    6.03
  -3  -8  -7   20.50    4.60
  -3   8  -7   25.32    4.95
  -3   8  -7   13.98    4.45
  -3   8  -7   28.99    5.21
   3   8   7   32.10    6.31
   3   8   7   33.30    6.46
  -3  -8  -8    9.87    3.82
  -3   8  -8   13.69    4.39
  -3   8  -8    5.42    4.03
  -3   8  -8   16.18    4.63
   3   8   8   21.58    5.98
   3   8   8   18.41    6.07
  -3  -8  -9   18.92    5.06
  -3   8  -9   18.33    5.10
  -3   8  -9    4.10    4.09
  -3   8  -9   21.61    5.59
   3   8   9   22.72    6.56
   3   8   9   28.38    6.97
  -3  -8 -10   19.00    5.70
  -3   8 -10   10.37    5.36
   3   8  10   32.34    8.01
   3   8  10   33.68    7.75
   3   8  11   -2.67    5.24
   3   8  11    1.51    6.46
   3  -9 -12   28.11    6.52
   3   9 -12    7.98    5.28
   3  -9 -11   53.15    7.72
   3  -9 -11   64.39    8.36
   3  -9 -10   24.55    5.84
   3  -9 -10   29.66    5.83
   3   9 -10   10.87    4.53
  -3   9   9   35.98    5.16
  -3   9   9   37.30    5.64
   3  -9  -9   42.04    6.31
   3  -9  -9   57.41    6.91
   3   9  -9   32.20    5.99
  -3  -9   8  215.44   10.72
  -3  -9   8  208.75   10.43
  -3   9   8  161.19    9.16
  -3   9   8  163.66    9.49
   3  -9  -8  178.60   10.81
   3  -9  -8  182.24   10.78
   3   9  -8  132.42    9.68
  -3  -9   7  122.69    7.89
  -3  -9   7  123.46    7.92
  -3   9   7  110.50    7.45
  -3   9   7  105.27    7.46
   3  -9  -7  107.59    8.25
   3  -9  -7  115.00    8.53
   3   9  -7  111.97    8.54
  -3  -9   6   13.46    3.37
  -3  -9   6   13.87    3.18
  -3   9   6   10.71    3.05
  -3   9   6   13.07    3.24
   3  -9  -6   13.20    3.49
   3  -9  -6   11.69    3.49
   3   9  -6   12.06    3.67
  -3  -9   5   33.87    4.32
  -3  -9   5   28.36    3.95
  -3   9   5   14.64    3.33
  -3   9   5   25.71    3.79
   3  -9  -5   32.24    4.56
   3  -9  -5   29.91    4.38
   3   9  -5   32.14    4.72
  -3  -9   4  210.07    9.13
  -3  -9   4  204.49    9.07
  -3   9   4  193.08    8.67
  -3   9   4  178.29    8.40
   3  -9  -4  192.89    9.15
   3  -9  -4  182.41    8.84
   3   9  -4  302.00   11.36
   3   9  -4  239.30    6.49
  -3  -9   3   68.19    5.40
  -3  -9   3   58.87    4.98
  -3   9   3   42.10    4.14
  -3   9   3   38.82    4.02
   3  -9  -3   63.26    5.28
   3  -9  -3   52.84    4.71
   3   9  -3   71.04    5.56
   3   9  -3   54.98    3.53
  -3  -9   2   36.99    4.07
  -3  -9   2   37.60    4.01
  -3  -9   2   33.61    3.80
  -3   9   2   37.65    4.04
  -3   9   2   31.80    3.97
   3  -9  -2   38.53    4.08
   3  -9  -2   36.25    3.91
   3   9  -2   56.87    3.97
  -3  -9   1   55.52    4.65
  -3  -9   1   47.72    4.33
  -3  -9   1   53.99    4.63
  -3   9   1   54.89    4.65
  -3   9   1   34.75    1.83
  -3   9   1   52.84    4.57
   3  -9  -1   44.69    4.20
   3  -9  -1   53.03    4.35
   3   9  -1   82.26    5.01
  -3  -9   0  729.68   16.27
  -3  -9   0  692.97   15.82
  -3  -9   0  746.47   16.19
  -3   9   0  795.51   16.98
  -3   9   0  437.82    8.04
  -3   9   0  765.01   16.70
   3  -9   0  753.17   14.32
   3   9   0 1226.01   19.56
   3   9   0 1286.13   19.93
  -3  -9  -1  215.83    8.97
  -3  -9  -1  216.07    8.97
  -3  -9  -1  231.29    9.28
  -3   9  -1  261.24   10.01
  -3   9  -1  132.65    5.47
  -3   9  -1  271.14   10.18
   3  -9   1  209.45    7.17
   3   9   1  420.36   12.36
   3   9   1  444.87   12.56
  -3  -9  -2    8.24    2.31
  -3  -9  -2   10.70    2.62
  -3  -9  -2   10.64    2.77
  -3   9  -2   12.31    2.92
  -3   9  -2    7.83    2.19
  -3   9  -2    9.88    2.74
   3  -9   2   10.60    1.81
   3   9   2   23.79    3.92
   3   9   2   25.69    4.18
  -3  -9  -3   64.91    5.27
  -3  -9  -3   67.06    5.29
  -3  -9  -3   86.86    6.21
  -3   9  -3  108.12    7.06
  -3   9  -3   35.69    4.03
  -3   9  -3  111.41    7.14
   3   9   3  167.95    8.94
   3   9   3  181.08    9.36
  -3  -9  -4  140.37    7.72
  -3  -9  -4  132.46    7.58
  -3  -9  -4  218.31   10.11
  -3   9  -4  253.50   10.85
  -3   9  -4  111.64    7.20
  -3   9  -4  258.57   10.99
   3   9   4  401.45   14.41
   3   9   4  437.29   14.84
  -3  -9  -5   39.11    4.47
  -3  -9  -5   37.68    4.51
  -3  -9  -5   68.16    6.13
  -3   9  -5   69.72    6.43
  -3   9  -5   28.68    4.85
  -3   9  -5   73.11    6.52
   3   9   5  149.44    8.77
   3   9   5  114.95    8.56
  -3  -9  -6    1.29    1.68
  -3  -9  -6   -0.54    1.37
  -3  -9  -6    6.67    3.10
  -3   9  -6    5.02    2.80
  -3   9  -6    1.45    3.05
  -3   9  -6    7.01    3.13
   3   9   6    8.29    4.19
   3   9   6    8.85    4.56
  -3  -9  -7   32.06    5.47
  -3   9  -7   32.94    5.39
  -3   9  -7   11.90    4.43
  -3   9  -7   34.32    5.71
   3   9   7   55.53    7.57
   3   9   7   49.88    7.30
  -3  -9  -8   68.29    7.54
  -3   9  -8   96.49    8.53
  -3   9  -8   41.31    6.89
  -3   9  -8   85.63    8.14
   3   9   8  128.77   10.46
   3   9   8  140.66   11.41
  -3  -9  -9   45.53    7.11
  -3   9  -9   48.72    7.11
  -3   9  -9   22.01    6.01
   3   9   9   92.41   10.32
   3   9   9   81.66    9.60
  -3  -9 -10    9.55    4.82
  -3   9 -10    2.53    4.70
   3   9  10   10.33    6.51
   3   9  10    0.48    6.37
   3   9  11    3.23    6.42
   3 -10 -12   18.25    6.29
   3 -10 -11    7.30    4.80
   3 -10 -11   10.61    5.20
   3  10 -11   13.58    5.34
   3 -10 -10   87.20    9.09
   3 -10 -10   83.70    8.64
  -3  10   9   84.60    7.42
  -3  10   9   85.54    7.89
   3 -10  -9   68.19    7.82
   3 -10  -9   77.47    8.24
   3  10  -9   37.31    6.49
  -3 -10   8  121.39    8.41
  -3 -10   8  113.92    8.15
  -3  10   8  100.21    7.68
  -3  10   8   94.29    7.79
   3 -10  -8  101.52    8.64
   3 -10  -8  100.57    8.58
   3  10  -8   89.41    8.24
  -3 -10   7   28.39    4.62
  -3 -10   7   24.83    4.36
  -3  10   7   17.31    3.77
  -3  10   7   20.42    4.15
   3 -10  -7   23.16    4.67
   3 -10  -7   28.05    4.99
   3  10  -7   26.03    5.07
  -3 -10   6   75.70    6.33
  -3 -10   6   68.76    6.01
  -3  10   6   66.29    5.87
  -3  10   6   65.98    6.08
   3 -10  -6   72.90    6.79
   3 -10  -6   79.69    7.10
   3  10  -6   74.16    7.04
  -3 -10   5  244.16   10.46
  -3 -10   5  235.78   10.17
  -3  10   5  215.03    9.84
  -3  10   5  211.37    9.91
   3 -10  -5  233.83   10.79
   3 -10  -5  237.20   10.86
   3  10  -5  313.23   12.49
  -3 -10   4  227.47    9.91
  -3 -10   4  212.61    9.54
  -3  10   4  149.09    8.06
  -3  10   4  155.39    8.37
   3 -10  -4  199.31    9.56
   3 -10  -4  213.64    9.88
   3  10  -4  262.64   11.05
   3  10  -4  200.67    6.56
  -3 -10   3   47.38    4.79
  -3 -10   3   42.97    4.48
  -3  10   3   34.33    4.01
  -3  10   3   42.35    4.40
   3 -10  -3   42.40    4.68
   3 -10  -3   39.55    4.46
   3  10  -3   67.52    5.60
   3  10  -3   49.96    3.68
  -3 -10   2  296.79   10.93
  -3 -10   2  296.73   10.86
  -3  10   2  267.81   10.39
  -3  10   2  271.23   10.42
   3 -10  -2  281.02   10.35
   3 -10  -2  299.08   10.60
   3  10  -2  395.80   10.29
  -3 -10   1  641.27   15.90
  -3 -10   1  613.34   15.51
  -3 -10   1  616.79   15.23
  -3  10   1  693.61   16.13
  -3  10   1  646.78   15.95
   3 -10  -1  661.13   14.95
   3 -10  -1  607.02   14.28
   3  10  -1 1023.04   17.62
   3  10  -1 1028.79   17.58
  -3 -10   0  227.53    9.58
  -3 -10   0  227.26    9.53
  -3 -10   0  250.22    9.77
  -3  10   0  284.16   10.70
  -3  10   0  146.70    5.01
  -3  10   0  279.10   10.63
   3 -10   0  245.68    8.81
   3 -10   0  233.36    8.49
   3  10   0  452.69   12.64
   3  10   0  461.82   12.64
  -3 -10  -1  273.47   10.57
  -3 -10  -1  287.11   10.77
  -3 -10  -1  324.57   11.26
  -3  10  -1  347.75   11.99
  -3  10  -1  158.53    6.20
  -3  10  -1  331.54   11.70
   3 -10   1  289.72    8.89
   3  10   1  539.30   14.47
   3  10   1  561.52   14.64
  -3 -10  -2    9.08    2.57
  -3 -10  -2   10.53    2.69
  -3 -10  -2   13.14    3.04
  -3  10  -2   10.69    2.93
  -3  10  -2    8.00    2.37
  -3  10  -2   13.76    3.27
   3 -10   2   10.05    1.96
   3  10   2   11.81    3.42
   3  10   2   16.67    3.80
  -3 -10  -3   58.36    5.15
  -3 -10  -3   51.41    5.01
  -3 -10  -3   71.77    5.88
  -3  10  -3   81.53    6.28
  -3  10  -3   40.00    4.39
  -3  10  -3   86.14    6.65
   3  10   3  126.36    8.12
   3  10   3  132.46    8.28
  -3 -10  -4   17.04    3.33
  -3 -10  -4   17.23    3.44
  -3 -10  -4   27.81    4.33
  -3  10  -4   32.86    4.80
  -3  10  -4   18.19    3.83
  -3  10  -4   29.21    4.67
   3  10   4   55.75    6.43
   3  10   4   53.46    5.96
  -3 -10  -5   19.40    3.73
  -3 -10  -5   18.12    3.66
  -3 -10  -5   38.76    5.23
  -3  10  -5   44.47    5.59
  -3  10  -5   26.66    4.80
  -3  10  -5   54.57    5.97
   3  10   5   98.58    7.33
   3  10   5   76.26    7.47
  -3 -10  -6   21.37    3.90
  -3 -10  -6   16.79    3.56
  -3 -10  -6   39.01    5.62
  -3  10  -6   52.87    5.99
  -3  10  -6   19.96    4.70
  -3  10  -6   57.75    6.35
   3  10   6   81.77    8.22
   3  10   6   79.87    8.33
  -3 -10  -7   26.99    5.27
  -3  10  -7   40.25    5.98
  -3  10  -7   17.82    4.94
  -3  10  -7   42.82    6.25
   3  10   7   61.34    7.64
   3  10   7   63.09    7.86
  -3 -10  -8    0.87    2.80
  -3  10  -8    0.77    2.99
  -3  10  -8    3.56    3.56
  -3  10  -8    6.29    4.01
   3  10   8    3.67    4.47
   3  10   8    2.50    4.72
  -3 -10  -9   21.20    5.70
  -3  10  -9   16.50    5.54
   3  10   9   37.81    8.15
   3  10   9   47.89    8.45
  -3 -10 -10   11.60    5.45
  -3  10 -10    3.97    4.27
   3  10  10   30.60    7.98
   3  10  10   25.43    8.31
   3  10  11    9.22    7.20
   3 -11 -12   14.37    6.08
   3 -11 -12    8.64    5.41
   3 -11 -11   17.12    5.77
   3 -11 -11   25.20    6.43
   3  11 -11    9.15    5.11
   3 -11 -10    9.80    4.91
   3 -11 -10   11.90    5.07
   3  11 -10   10.29    5.13
  -3  11   9   21.93    4.80
  -3  11   9   21.21    5.29
   3 -11  -9   28.52    5.81
   3 -11  -9   22.43    5.44
   3  11  -9   10.48    4.56
  -3 -11   8   76.55    7.11
  -3 -11   8   75.45    7.03
  -3  11   8   63.04    6.64
  -3  11   8   73.46    7.25
   3 -11  -8   56.62    7.02
   3 -11  -8   62.04    7.40
   3  11  -8   48.78    6.86
  -3 -11   7   68.28    6.70
  -3 -11   7   56.63    6.04
  -3  11   7   56.11    5.99
  -3  11   7   55.69    6.22
   3 -11  -7   55.79    6.67
   3 -11  -7   51.90    6.31
   3  11  -7   59.23    7.08
  -3 -11   6  109.87    7.64
  -3 -11   6   98.17    7.13
  -3  11   6   72.05    6.33
  -3  11   6   83.47    6.97
   3 -11  -6   93.09    7.78
   3 -11  -6   86.75    7.42
   3  11  -6   99.26    7.92
  -3 -11   5  258.56   11.06
  -3 -11   5  254.38   10.95
  -3  11   5  216.37   10.32
  -3  11   5  213.95   10.39
   3 -11  -5  235.39   11.24
   3 -11  -5  245.87   11.53
   3  11  -5  321.79   12.99
  -3 -11   4  196.92    9.57
  -3 -11   4  189.30    9.37
  -3  11   4  173.28    9.05
  -3  11   4  174.87    9.22
   3 -11  -4  187.20    9.68
   3 -11  -4  158.81    8.87
   3  11  -4  278.60   11.64
   3  11  -4  210.25    7.25
  -3 -11   3    3.12    2.15
  -3 -11   3    1.51    1.65
  -3  11   3   -0.57    1.30
  -3  11   3   -0.91    1.63
   3 -11  -3    1.05    2.05
   3 -11  -3    4.01    2.40
   3  11  -3    0.05    2.23
   3  11  -3    0.87    1.55
  -3 -11   2  208.71    9.53
  -3 -11   2  209.22    9.54
  -3  11   2  193.13    9.21
  -3  11   2  185.99    9.06
   3 -11  -2  189.03    8.85
   3 -11  -2  196.72    8.97
   3  11  -2  309.88    9.87
   3  11  -2  316.59   11.57
   3  11  -2  298.70    9.49
  -3 -11   1  117.14    7.20
  -3 -11   1  113.66    7.14
  -3 -11   1  118.30    7.11
  -3  11   1  145.38    7.57
  -3  11   1  121.48    7.41
   3 -11  -1  112.19    6.77
   3 -11  -1  106.52    6.51
   3  11  -1  208.27    8.57
   3  11  -1  216.37    8.75
  -3 -11   0  642.98   16.63
  -3 -11   0  621.74   16.33
  -3 -11   0  707.92   16.83
  -3  11   0  694.64   17.28
  -3  11   0  695.58   17.28
   3 -11   0  642.74   14.70
   3 -11   0  636.00   14.58
   3  11   0 1129.10   20.47
   3  11   0 1128.19   20.30
  -3 -11  -1   69.57    5.76
  -3 -11  -1   70.13    5.79
  -3 -11  -1   90.92    6.36
  -3  11  -1   80.57    6.23
  -3  11  -1   36.50    3.67
  -3  11  -1   75.12    6.00
   3 -11   1   75.58    5.24
   3 -11   1   73.10    4.89
   3  11   1  133.79    7.82
   3  11   1  129.14    7.72
  -3 -11  -2   27.04    4.09
  -3 -11  -2   24.04    3.84
  -3 -11  -2   35.79    4.27
  -3  11  -2   46.88    4.95
  -3  11  -2   18.89    3.23
  -3  11  -2   44.52    5.05
   3 -11   2   33.40    3.38
   3  11   2   71.77    6.26
   3  11   2   79.61    6.68
  -3 -11  -3   36.90    4.49
  -3 -11  -3   39.12    4.72
  -3 -11  -3   60.60    5.64
  -3  11  -3   64.27    5.89
  -3  11  -3   33.66    4.33
  -3  11  -3   83.86    6.85
   3  11   3  114.32    8.04
   3  11   3  117.99    8.10
  -3 -11  -4  126.25    7.99
  -3 -11  -4  119.93    7.81
  -3 -11  -4  183.12    9.77
  -3  11  -4  208.94   10.55
  -3  11  -4   40.29    4.79
  -3  11  -4  214.95   10.61
   3  11   4  350.97   14.13
   3  11   4  355.16   14.17
  -3 -11  -5    1.01    1.80
  -3 -11  -5    0.59    1.93
  -3 -11  -5    3.39    2.53
  -3  11  -5    1.44    2.33
  -3  11  -5    1.01    2.81
  -3  11  -5    2.78    2.73
   3  11   5    7.51    3.69
   3  11   5    1.32    3.58
  -3 -11  -6    1.92    2.02
  -3 -11  -6   -0.61    1.92
  -3 -11  -6    2.26    2.37
  -3  11  -6    3.48    3.15
  -3  11  -6   -2.28    2.91
  -3  11  -6    2.80    3.09
   3  11   6    5.16    3.93
   3  11   6    7.73    4.77
  -3 -11  -7   34.54    5.78
  -3  11  -7   49.86    6.59
  -3  11  -7    9.72    4.38
  -3  11  -7   46.02    6.44
   3  11   7   69.16    8.15
   3  11   7   76.87    9.02
  -3 -11  -8   27.70    5.64
  -3  11  -8   30.55    5.86
  -3  11  -8   13.08    4.72
  -3  11  -8   30.62    6.18
   3  11   8   51.04    8.21
   3  11   8   45.08    8.03
  -3 -11  -9    1.98    3.38
  -3  11  -9    1.45    3.75
   3  11   9   12.64    6.69
   3  11   9    9.64    6.74
  -3 -11 -10   -2.58    3.64
  -3  11 -10   -2.92    4.39
   3  11  10   -2.17    5.63
   3  11  10    2.77    6.86
   3  11  11    4.32    6.67
   3 -12 -12    5.04    5.28
   3 -12 -12    3.70    5.08
   3 -12 -11   -2.46    4.06
   3 -12 -11    0.69    4.11
   3  12 -11    0.71    4.45
   3 -12 -10   33.06    6.44
   3 -12 -10   33.31    6.62
   3  12 -10   16.98    5.92
  -3  12   9   14.79    4.36
  -3  12   9   12.36    4.57
   3 -12  -9   16.39    4.93
   3 -12  -9    9.08    4.41
   3  12  -9    9.39    4.40
  -3 -12   8    9.29    4.05
  -3 -12   8    3.20    3.19
  -3  12   8    1.43    3.15
  -3  12   8    1.41    3.08
   3 -12  -8    4.56    3.80
   3 -12  -8    5.76    3.55
   3  12  -8    1.98    3.37
  -3 -12   7    4.48    3.23
  -3 -12   7    3.63    2.89
  -3  12   7    0.95    2.31
  -3  12   7    0.25    2.59
   3 -12  -7    2.51    2.85
   3 -12  -7    4.13    3.17
   3  12  -7    6.08    3.83
  -3 -12   6  125.58    8.40
  -3 -12   6  130.51    8.50
  -3  12   6  105.23    7.85
  -3  12   6  114.44    8.37
   3 -12  -6  111.29    8.61
   3 -12  -6  125.55    9.14
   3  12  -6  147.26    9.84
  -3 -12   5   90.04    7.11
  -3 -12   5   92.65    7.00
  -3  12   5   67.81    6.20
  -3  12   5   83.15    6.89
   3 -12  -5   87.33    7.43
   3 -12  -5   76.43    6.84
   3  12  -5  108.78    8.09
  -3 -12   4   34.11    4.63
  -3 -12   4   29.10    4.43
  -3  12   4   29.31    4.51
  -3  12   4   23.82    4.27
   3 -12  -4   30.87    4.63
   3 -12  -4   33.82    4.77
   3  12  -4   45.79    5.44
  -3 -12   3   17.61    3.58
  -3 -12   3   20.81    3.81
  -3  12   3   13.62    3.39
  -3  12   3   15.25    3.64
   3 -12  -3   18.85    3.68
   3 -12  -3   18.43    3.59
   3  12  -3   25.63    3.58
   3  12  -3   29.36    4.66
   3  12  -3   20.33    3.06
  -3 -12   2  132.63    7.92
  -3 -12   2  143.09    8.22
  -3  12   2  137.38    8.20
  -3  12   2  147.45    8.47
   3 -12  -2  136.74    8.02
   3 -12  -2  135.24    7.96
   3  12  -2  218.00    8.73
   3  12  -2  250.77   10.81
   3  12  -2  199.26    8.26
  -3 -12   1  485.42   15.00
  -3 -12   1  495.21   15.08
  -3 -12   1  539.78   15.24
  -3  12   1  513.75   15.39
  -3  12   1  495.25   15.23
   3 -12  -1  487.66   14.03
   3 -12  -1  482.45   13.86
   3  12  -1  804.58   17.17
   3  12  -1  785.37   16.89
  -3 -12   0  130.62    8.01
  -3 -12   0  128.80    7.91
  -3 -12   0  157.71    8.41
  -3  12   0  167.90    9.12
  -3  12   0  170.84    9.16
   3 -12   0  136.83    7.36
   3 -12   0  127.05    7.00
   3  12   0  259.42   10.47
   3  12   0  276.02   10.77
  -3 -12  -1   56.32    5.51
  -3 -12  -1   50.33    5.19
  -3 -12  -1   68.59    5.72
  -3  12  -1   71.19    6.12
  -3  12  -1   75.53    6.38
   3 -12   1   59.50    4.89
   3 -12   1   63.02    4.87
   3  12   1  116.94    7.55
   3  12   1  116.20    7.63
  -3 -12  -2   54.58    5.45
  -3 -12  -2   53.59    5.41
  -3 -12  -2   74.81    6.07
  -3  12  -2   76.90    6.48
  -3  12  -2   36.04    4.15
  -3  12  -2   72.29    6.34
   3 -12   2   66.44    4.72
   3  12   2  118.15    8.07
   3  12   2  117.31    8.14
  -3 -12  -3  117.31    7.90
  -3 -12  -3  128.78    8.21
  -3 -12  -3  193.86    9.86
  -3  12  -3  202.94   10.38
  -3  12  -3   79.54    6.25
  -3  12  -3  221.10   10.79
   3  12   3  306.50   13.13
   3  12   3  325.66   13.44
  -3 -12  -4    9.20    3.02
  -3 -12  -4    6.57    2.85
  -3 -12  -4   13.08    3.51
  -3  12  -4   26.08    4.66
  -3  12  -4   -0.57    1.85
  -3  12  -4   21.35    4.57
   3  12   4   35.35    5.89
   3  12   4   42.37    6.12
  -3 -12  -5   12.33    3.40
  -3 -12  -5    7.23    2.99
  -3 -12  -5   10.88    3.56
  -3  12  -5   16.89    4.18
  -3  12  -5    6.43    3.62
  -3  12  -5   17.62    4.27
   3  12   5   25.21    5.47
   3  12   5   20.88    5.59
  -3 -12  -6    0.83    1.84
  -3 -12  -6   -0.43    1.93
  -3 -12  -6    0.35    2.30
  -3  12  -6   -0.60    2.35
  -3  12  -6   -0.22    3.19
  -3  12  -6   -0.39    2.38
   3  12   6    0.19    4.31
  -3 -12  -7   22.26    4.50
  -3 -12  -7   17.34    4.29
  -3 -12  -7   46.66    6.61
  -3  12  -7   43.33    6.32
  -3  12  -7   14.00    4.98
  -3  12  -7   40.68    6.36
   3  12   7   76.99    8.96
   3  12   7   74.08    9.22
  -3 -12  -8   20.78    5.44
  -3  12  -8   21.68    5.22
  -3  12  -8   12.46    5.14
  -3  12  -8   29.99    6.17
   3  12   8   34.20    7.58
   3  12   8   53.53    8.89
  -3 -12  -9    0.37    3.45
  -3  12  -9    1.05    4.39
   3  12   9    1.23    5.57
   3  12   9    4.16    6.67
  -3 -12 -10   -1.38    3.55
   3  12  10    2.70    5.61
   3 -13 -12    7.93    5.36
   3 -13 -11   -0.98    3.92
   3 -13 -11    0.48    4.12
  -3  13  10   -0.05    2.90
   3 -13 -10    3.76    4.10
   3 -13 -10    3.28    4.26
   3  13 -10    0.61    4.14
  -3  13   9   31.49    6.11
  -3  13   9   33.16    6.38
   3 -13  -9   33.94    6.58
   3 -13  -9   32.34    6.31
   3  13  -9   26.10    6.14
  -3 -13   8   16.21    4.33
  -3  13   8   11.90    4.04
  -3  13   8   10.09    4.27
   3 -13  -8   13.12    4.76
   3 -13  -8   12.04    4.43
   3  13  -8   14.21    5.03
  -3 -13   7   11.96    4.12
  -3 -13   7   11.40    3.69
  -3  13   7    5.63    2.97
  -3  13   7    6.82    3.48
   3 -13  -7    5.85    3.70
   3 -13  -7    6.33    3.92
   3  13  -7    8.98    4.41
  -3 -13   6   11.32    3.62
  -3 -13   6    8.70    3.32
  -3  13   6    5.29    2.75
  -3  13   6   12.41    4.04
   3 -13  -6    9.58    3.83
   3 -13  -6    8.20    3.54
   3  13  -6   16.16    4.72
  -3 -13   5   34.60    5.19
  -3 -13   5   35.27    5.04
  -3  13   5   22.51    4.44
  -3  13   5   26.57    4.79
   3 -13  -5   33.87    5.34
   3 -13  -5   35.32    5.41
   3  13  -5   38.44    5.78
  -3 -13   4    1.31    2.02
  -3 -13   4   -0.99    1.73
  -3  13   4   -0.24    1.54
  -3  13   4    0.91    2.29
   3 -13  -4    0.81    1.99
   3 -13  -4   -0.99    1.76
   3  13  -4    0.79    2.51
  -3 -13   3   16.90    3.73
  -3 -13   3   14.69    3.49
  -3  13   3   12.88    3.48
  -3  13   3   12.26    3.65
   3 -13  -3   12.03    3.22
   3 -13  -3   17.76    3.76
   3  13  -3   20.31    3.43
   3  13  -3   28.31    4.72
   3  13  -3   17.96    3.25
  -3 -13   2  243.82   11.14
  -3 -13   2  239.76   11.03
  -3  13   2  258.64   11.36
  -3  13   2  228.98   10.87
   3 -13  -2  233.37   10.67
   3 -13  -2  225.17   10.48
   3  13  -2  349.57   11.57
   3  13  -2  383.60   13.68
   3  13  -2  349.14   11.41
  -3 -13   1  294.21   12.19
  -3 -13   1  291.91   12.09
  -3 -13   1  347.53   12.72
  -3  13   1  321.29   12.65
  -3  13   1  295.09   12.24
   3 -13  -1  287.73   11.34
   3 -13  -1  281.31   11.11
   3  13  -1  514.83   14.50
   3  13  -1  506.60   14.29
  -3 -13   0  111.91    7.68
  -3 -13   0  107.63    7.64
  -3 -13   0  126.53    7.87
  -3  13   0  122.33    8.15
  -3  13   0  129.98    8.41
   3 -13   0  112.23    7.11
   3 -13   0  112.52    6.87
   3  13   0  200.14    9.74
   3  13   0  206.93    9.78
  -3 -13  -1   32.01    4.68
  -3 -13  -1   35.64    4.84
  -3 -13  -1   48.95    5.18
  -3  13  -1   42.77    5.14
  -3  13  -1   40.63    5.37
   3 -13   1   32.34    4.17
   3 -13   1   35.25    4.00
   3  13   1   62.69    6.28
   3  13   1   63.69    6.24
  -3 -13  -2   39.59    4.85
  -3 -13  -2   41.11    4.97
  -3 -13  -2   62.28    5.86
  -3  13  -2   65.87    6.22
  -3  13  -2   69.28    6.53
   3 -13   2   44.35    4.19
   3  13   2   99.06    7.65
   3  13   2  105.75    8.04
  -3 -13  -3   35.30    4.99
  -3 -13  -3   35.53    4.97
  -3 -13  -3   52.77    5.65
  -3  13  -3   59.51    6.22
  -3  13  -3   65.30    6.48
   3  13   3  105.35    8.34
   3  13   3  111.72    8.67
  -3 -13  -4   33.61    4.98
  -3 -13  -4   30.07    4.77
  -3 -13  -4   55.72    5.99
  -3  13  -4   49.62    5.90
  -3  13  -4   17.01    4.18
  -3  13  -4   45.09    5.94
   3  13   4   80.09    7.84
   3  13   4   75.58    7.53
  -3 -13  -5   10.76    3.51
  -3 -13  -5   11.36    3.60
  -3 -13  -5   17.39    4.22
  -3  13  -5   20.96    4.65
  -3  13  -5    6.49    3.63
  -3  13  -5   22.35    4.78
   3  13   5   32.16    6.52
   3  13   5   33.43    6.41
  -3 -13  -6   12.55    3.76
  -3 -13  -6   15.01    4.13
  -3 -13  -6   30.26    5.46
  -3  13  -6   23.10    4.94
  -3  13  -6   11.59    4.43
  -3  13  -6   32.38    5.77
   3  13   6   99.43    7.04
   3  13   6   56.41    7.98
  -3 -13  -7    0.20    2.25
  -3 -13  -7   -0.38    2.43
  -3 -13  -7    5.74    3.70
  -3  13  -7    6.36    3.34
  -3  13  -7    3.39    4.03
  -3  13  -7    5.70    4.21
   3  13   7    5.21    5.14
   3  13   7   13.16    6.32
  -3 -13  -8   24.51    5.85
  -3  13  -8   28.99    6.02
  -3  13  -8   15.61    5.46
   3  13   8   48.38    8.63
   3  13   8   52.79    8.89
  -3 -13  -9   38.01    7.14
  -3  13  -9   12.41    5.46
   3  13   9   78.33   10.67
   3  13   9   82.09   10.92
  -3 -13 -10   11.66    5.92
   3  13  10   19.69    8.21
   3 -14 -12   10.67    6.07
   3 -14 -11    3.32    4.68
  -3  14  10    3.19    3.73
  -3  14  10    1.60    4.46
   3 -14 -10   -0.77    3.64
   3 -14 -10    0.76    3.93
   3  14 -10    3.11    4.89
  -3  14   9   -0.71    2.63
  -3  14   9    5.47    4.42
   3 -14  -9    4.54    4.06
   3 -14  -9   -1.93    3.55
   3  14  -9    4.51    4.37
  -3  14   8   17.32    4.89
  -3  14   8   20.09    5.31
   3 -14  -8   26.50    5.79
   3 -14  -8   27.21    5.94
   3  14  -8   29.30    6.35
  -3 -14   7   73.56    7.28
  -3 -14   7   72.98    7.25
  -3  14   7   79.01    7.59
  -3  14   7   67.60    7.52
   3 -14  -7   65.31    7.60
   3 -14  -7   70.17    7.88
   3  14  -7   76.91    8.30
  -3 -14   6    9.52    3.69
  -3 -14   6   10.44    3.59
  -3  14   6    7.39    3.35
  -3  14   6    8.35    3.59
   3 -14  -6    7.98    3.57
   3 -14  -6   10.26    3.95
   3  14  -6   10.06    4.23
  -3 -14   5   18.43    4.30
  -3 -14   5   16.37    3.87
  -3  14   5   18.18    4.23
  -3  14   5   14.91    4.10
   3 -14  -5    9.89    3.81
   3 -14  -5   13.88    3.91
   3  14  -5   26.88    5.31
  -3 -14   4    9.77    3.46
  -3 -14   4   13.68    3.63
  -3  14   4    3.97    2.72
  -3  14   4    3.94    2.98
   3 -14  -4    9.75    3.62
   3 -14  -4   11.04    3.68
   3  14  -4    4.23    3.09
  -3 -14   3    9.41    3.29
  -3 -14   3   17.70    3.87
  -3  14   3   12.54    3.67
  -3  14   3   13.00    3.95
   3 -14  -3   12.56    3.56
   3 -14  -3   11.92    3.56
   3  14  -3   16.80    3.53
   3  14  -3   21.96    4.60
   3  14  -3   18.84    3.44
  -3 -14   2    6.65    2.80
  -3 -14   2    3.95    2.57
  -3  14   2    6.99    3.09
   3 -14  -2    5.94    2.80
   3 -14  -2    3.75    2.53
   3  14  -2    7.97    3.11
   3  14  -2    8.56    3.35
   3  14  -2    6.14    2.73
  -3 -14   1  212.71   10.74
  -3 -14   1  206.11   10.65
  -3 -14   1  264.09   11.43
  -3  14   1  216.61   10.91
  -3  14   1  209.16   10.76
   3 -14  -1  207.33   10.14
   3 -14  -1  208.74   10.06
   3  14  -1  351.51   12.57
   3  14  -1  342.42   12.39
  -3 -14   0  142.11    8.90
  -3 -14   0  141.31    8.90
  -3 -14   0  193.87    9.81
  -3  14   0  186.02   10.12
  -3  14   0  166.72    9.77
   3 -14   0  163.86    8.80
   3 -14   0  160.69    8.53
   3  14   0  276.05   11.65
   3  14   0  283.56   11.79
  -3 -14  -1   96.24    7.55
  -3 -14  -1  104.28    7.84
  -3 -14  -1  133.59    8.34
  -3  14  -1  134.20    8.80
  -3  14  -1  123.56    8.55
   3 -14   1  118.91    7.36
   3 -14   1  116.03    7.12
   3  14   1  204.51   10.49
   3  14   1  211.90   10.78
  -3 -14  -2    9.09    3.05
  -3 -14  -2   10.02    3.22
  -3 -14  -2   17.28    3.87
  -3  14  -2   17.94    4.10
  -3  14  -2   14.56    4.06
   3 -14   2   10.81    2.76
   3  14   2   20.78    4.70
   3  14   2   33.28    5.55
  -3 -14  -3   23.79    4.44
  -3 -14  -3   19.88    4.14
  -3 -14  -3   36.17    5.20
  -3  14  -3   36.64    5.56
  -3  14  -3   32.58    5.30
   3  14   3   56.27    6.79
   3  14   3   53.45    6.50
  -3 -14  -4   24.69    4.60
  -3 -14  -4   20.50    4.29
  -3 -14  -4   42.05    5.73
  -3  14  -4   40.15    5.88
  -3  14  -4   31.45    5.50
   3  14   4   55.78    7.36
   3  14   4   53.39    7.37
  -3 -14  -5   45.16    6.10
  -3 -14  -5   42.07    5.77
  -3 -14  -5   75.69    7.28
  -3  14  -5   84.93    7.72
  -3  14  -5   25.95    5.25
  -3  14  -5   84.55    7.94
   3  14   5  139.64   10.65
   3  14   5  153.05   10.97
  -3 -14  -6   31.60    5.39
  -3 -14  -6   27.17    5.08
  -3 -14  -6   54.64    6.74
  -3  14  -6   66.36    7.39
  -3  14  -6   19.21    5.21
  -3  14  -6   57.93    7.23
   3  14   6  130.02   10.38
   3  14   6  107.74   10.04
  -3 -14  -7   21.06    4.98
  -3 -14  -7   14.14    4.41
  -3 -14  -7   38.68    6.42
  -3  14  -7   35.14    6.11
  -3  14  -7   10.34    4.77
  -3  14  -7   36.38    6.58
   3  14   7   57.90    9.26
   3  14   7   72.53    9.93
  -3 -14  -8   48.49    7.54
  -3  14  -8   12.59    5.58
   3  14   8   89.58   10.98
   3  14   8  100.93   11.59
  -3  14  -9   -3.73    3.64
   3  14   9    6.70    7.05
   3  14  10    6.95    7.16
   3 -15 -11    6.44    5.11
  -3  15  10    6.27    4.68
  -3  15  10    3.83    4.54
   3 -15 -10    1.80    4.01
   3 -15 -10    3.44    4.63
   3  15 -10    5.32    5.00
  -3  15   9    0.51    3.23
  -3  15   9    2.30    4.11
   3 -15  -9   -0.67    3.65
   3 -15  -9    2.33    3.55
   3  15  -9    1.23    4.10
  -3  15   8   19.52    5.37
  -3  15   8   21.22    5.77
   3 -15  -8   19.96    5.40
   3 -15  -8   24.60    5.75
   3  15  -8   22.82    6.11
  -3 -15   7   41.61    6.28
  -3 -15   7   33.93    5.61
  -3  15   7   15.90    4.77
  -3  15   7   25.87    5.77
   3 -15  -7   33.40    5.98
   3 -15  -7   25.50    5.71
   3  15  -7   27.77    6.17
  -3 -15   6    6.93    3.61
  -3 -15   6    7.85    3.70
  -3  15   6    5.34    3.35
  -3  15   6    5.87    3.74
   3 -15  -6    6.52    3.55
   3 -15  -6    9.30    3.92
   3  15  -6    9.44    4.46
  -3 -15   5    9.37    3.69
  -3 -15   5    8.38    3.29
  -3  15   5    4.10    3.02
  -3  15   5    8.32    3.97
   3 -15  -5    4.22    3.38
   3 -15  -5    9.22    3.71
   3  15  -5    8.67    4.12
  -3 -15   4   87.97    7.68
  -3 -15   4   88.93    7.37
  -3  15   4   85.19    7.64
  -3  15   4   73.00    7.26
   3 -15  -4   79.25    7.53
   3 -15  -4   83.20    7.49
   3  15  -4  133.98    9.53
  -3 -15   3   20.27    4.31
  -3 -15   3   15.41    3.78
  -3  15   3   19.16    4.38
  -3  15   3   14.59    4.10
   3 -15  -3   18.28    4.36
   3 -15  -3   17.78    4.03
   3  15  -3   30.58    5.28
   3  15  -3   15.97    3.41
  -3 -15   2    2.44    2.34
  -3 -15   2    3.78    2.24
  -3  15   2    0.81    2.53
   3 -15  -2    4.95    2.94
   3 -15  -2    1.90    2.40
   3  15  -2    4.34    2.73
   3  15  -2    5.83    3.56
   3  15  -2    4.53    2.85
  -3 -15   1    4.09    2.64
  -3 -15   1    2.89    2.16
  -3  15   1    6.32    3.16
  -3  15   1    1.28    2.46
   3 -15  -1    3.52    2.72
   3 -15  -1    1.01    2.16
   3  15  -1    4.80    3.17
   3  15  -1    6.09    3.19
  -3 -15   0   69.81    6.58
  -3 -15   0   71.38    6.67
  -3 -15   0   98.08    7.31
  -3  15   0   83.32    7.37
  -3  15   0   82.68    7.38
   3 -15   0   79.66    6.62
   3 -15   0   72.51    6.21
   3  15   0  134.23    8.79
   3  15   0  135.29    8.74
  -3 -15  -1   47.37    5.55
  -3 -15  -1   42.36    5.77
  -3 -15  -1   56.83    5.75
  -3  15  -1   47.70    5.96
  -3  15  -1   44.87    6.04
   3 -15   1   55.38    5.57
   3 -15   1   55.87    5.50
   3  15   1   74.76    7.25
   3  15   1   72.85    6.87
  -3 -15  -2   55.39    6.15
  -3 -15  -2   48.79    5.93
  -3 -15  -2   77.96    6.86
  -3  15  -2   69.40    6.73
  -3  15  -2   71.34    6.82
   3  15   2  110.68    8.76
   3  15   2  116.01    8.73
  -3 -15  -3   10.05    3.40
  -3 -15  -3    3.90    2.63
  -3 -15  -3    9.64    3.62
  -3  15  -3    7.50    3.66
  -3  15  -3    5.32    3.30
   3  15   3    9.57    4.07
   3  15   3    9.85    4.59
  -3 -15  -4   27.36    4.93
  -3 -15  -4   23.94    4.75
  -3 -15  -4   44.02    6.03
  -3  15  -4   62.12    7.07
  -3  15  -4   49.65    6.59
   3  15   4   64.87    7.47
   3  15   4   78.91    8.13
  -3 -15  -5   43.98    6.14
  -3 -15  -5   52.58    6.56
  -3 -15  -5   89.33    8.04
  -3  15  -5  106.91    8.99
  -3  15  -5  100.67    8.79
   3  15   5  156.81   11.52
   3  15   5  164.89   11.69
  -3 -15  -6   20.39    4.95
  -3 -15  -6   26.42    5.31
  -3 -15  -6   53.02    6.92
  -3  15  -6   62.54    7.46
   3  15   6   93.08   10.36
   3  15   6   93.67   10.16
  -3 -15  -7    3.47    3.21
  -3 -15  -7    3.33    3.29
  -3 -15  -7    2.21    3.02
  -3  15  -7    1.19    3.17
  -3  15  -7    3.42    4.25
   3  15   7    5.18    5.84
   3  15   7    0.84    5.54
  -3  15  -8   -0.34    4.12
   3  15   8    1.29    6.04
   3  15   8    3.87    6.47
  -3  15  -9    6.18    5.63
   3  15   9   27.31    8.35
   3 -16 -11    5.89    5.39
  -3  16  10   10.99    5.29
  -3  16  10   10.59    6.06
   3 -16 -10    9.35    4.95
  -3  16   9    3.26    3.77
  -3  16   9    3.95    4.67
   3 -16  -9    1.75    3.47
   3 -16  -9    0.87    4.08
   3  16  -9    5.49    5.13
  -3  16   8    6.42    4.29
  -3  16   8    5.29    4.39
   3 -16  -8    4.08    3.79
   3 -16  -8    0.53    3.75
   3  16  -8    1.59    4.07
  -3 -16   7   35.51    6.19
  -3 -16   7   35.06    5.96
  -3  16   7   23.97    5.38
  -3  16   7   24.56    5.66
   3 -16  -7   27.97    6.04
   3 -16  -7   29.98    6.10
   3  16  -7   26.53    6.14
  -3 -16   6   98.93    8.65
  -3 -16   6   94.41    8.36
  -3  16   6   88.93    8.55
  -3  16   6   92.41    8.86
   3 -16  -6   80.19    8.35
   3 -16  -6   72.24    7.90
   3  16  -6  115.04    9.65
  -3 -16   5   28.60    5.37
  -3 -16   5   31.08    5.39
  -3  16   5   31.55    5.84
  -3  16   5   24.71    5.54
   3 -16  -5   20.56    5.04
   3 -16  -5   25.85    5.15
   3  16  -5   42.76    6.70
  -3 -16   4   73.81    7.36
  -3 -16   4   85.31    7.64
  -3  16   4   66.06    7.13
  -3  16   4   63.98    7.14
   3 -16  -4   62.22    7.04
   3 -16  -4   50.79    6.25
   3  16  -4  110.31    8.88
  -3 -16   3   75.75    7.27
  -3 -16   3   62.50    6.58
  -3  16   3   90.53    7.93
  -3  16   3   71.99    7.33
   3 -16  -3   60.31    6.70
   3 -16  -3   62.23    6.63
   3  16  -3  125.90    9.12
  -3 -16   2    4.22    2.68
  -3 -16   2    6.99    3.19
  -3  16   2    7.45    3.13
  -3  16   2    7.32    3.31
   3 -16  -2    7.76    3.39
   3 -16  -2    4.87    2.80
   3  16  -2    9.83    3.58
   3  16  -2   10.09    4.22
   3  16  -2    7.36    3.55
  -3 -16   1   30.67    5.02
  -3 -16   1   28.26    4.84
  -3  16   1   36.78    5.84
  -3  16   1   26.08    5.18
   3 -16  -1   28.05    4.79
   3 -16  -1   26.80    4.56
   3  16  -1   48.53    5.69
   3  16  -1   49.91    6.46
   3  16  -1   42.04    5.58
  -3 -16   0   44.35    5.95
  -3 -16   0   42.55    5.78
  -3 -16   0   54.84    5.99
  -3  16   0   43.12    6.09
  -3  16   0   35.72    5.59
   3 -16   0   43.38    5.38
   3 -16   0   37.51    5.00
   3  16   0   57.75    6.48
   3  16   0   63.72    6.70
  -3 -16  -1  196.05   11.23
  -3 -16  -1  178.25   10.83
  -3 -16  -1  254.90   11.99
  -3  16  -1  243.35   12.46
  -3  16  -1  238.73   12.35
   3 -16   1  220.68   10.63
   3 -16   1  218.47   10.47
   3  16   1  366.85   14.93
   3  16   1  416.33   15.70
  -3 -16  -2   23.99    4.92
  -3 -16  -2   23.99    4.81
  -3 -16  -2   41.88    5.59
  -3  16  -2   35.93    5.84
  -3  16  -2   24.26    4.87
   3  16   2   57.00    7.02
   3  16   2   56.41    6.99
  -3 -16  -3   -1.87    2.04
  -3 -16  -3   -0.63    1.88
  -3 -16  -3    2.51    2.56
  -3  16  -3    2.20    2.66
  -3  16  -3    1.54    3.12
   3  16   3    2.81    3.73
   3  16   3   -0.52    3.36
  -3 -16  -4   34.94    5.70
  -3 -16  -4   29.08    5.45
  -3 -16  -4   50.66    6.55
  -3  16  -4   53.51    7.06
  -3  16  -4   49.46    6.89
   3  16   4   71.39    8.27
   3  16   4   83.69    8.66
  -3 -16  -5   43.26    6.48
  -3 -16  -5   42.49    6.35
  -3 -16  -5   75.79    7.73
  -3  16  -5   67.78    7.64
  -3  16  -5   76.69    8.29
   3  16   5  116.81   10.50
   3  16   5  128.77   10.74
  -3 -16  -6    7.42    3.84
  -3 -16  -6    7.03    3.73
  -3 -16  -6   16.30    4.90
  -3  16  -6   16.32    5.01
  -3  16  -6   17.98    5.48
   3  16   6   28.95    7.18
   3  16   6   24.61    6.68
  -3 -16  -7    0.79    2.81
  -3 -16  -7    1.90    3.15
  -3  16  -7   -0.15    3.16
   3  16   7    2.03    5.22
   3  16   7    4.05    5.40
   3  16   8    6.31    6.13
   3  16   9   -0.29    6.29
  -3  17  10   13.27    5.66
   3 -17 -10    7.53    5.27
  -3  17   9    8.82    4.88
  -3  17   9    9.73    5.80
   3 -17  -9    3.58    4.04
   3 -17  -9   10.20    5.63
   3  17  -9   12.63    5.92
  -3  17   8    5.12    3.97
  -3  17   8    3.91    4.21
   3 -17  -8    6.46    4.40
   3 -17  -8    6.36    4.37
   3  17  -8    2.55    4.49
  -3 -17   7   55.07    7.52
  -3 -17   7   48.03    6.81
  -3  17   7   49.05    7.70
  -3  17   7   44.37    7.47
   3 -17  -7   38.76    6.82
   3 -17  -7   37.85    6.78
   3  17  -7   37.78    7.15
  -3 -17   6   20.37    5.26
  -3 -17   6   26.21    5.50
  -3  17   6   27.57    5.99
  -3  17   6   35.53    6.63
   3 -17  -6   16.76    4.99
   3 -17  -6   19.03    5.30
   3  17  -6   32.04    6.36
  -3 -17   5   41.58    6.43
  -3 -17   5   45.98    6.29
  -3  17   5   43.49    6.74
  -3  17   5   38.75    6.82
   3 -17  -5   33.34    6.01
   3 -17  -5   38.42    6.31
   3  17  -5   54.71    7.57
  -3 -17   4   68.50    7.45
  -3 -17   4   61.42    6.79
  -3  17   4   55.16    7.26
  -3  17   4   61.14    7.52
   3 -17  -4   49.47    6.84
   3 -17  -4   53.32    6.92
   3  17  -4   82.24    8.35
  -3 -17   3   71.48    7.35
  -3 -17   3   73.40    7.22
  -3  17   3  120.91    8.07
  -3  17   3   74.76    7.76
   3 -17  -3   60.16    6.94
   3 -17  -3   62.14    6.88
   3  17  -3  129.22    9.71
  -3 -17   2    2.47    2.61
  -3 -17   2    7.15    3.24
  -3  17   2    5.23    3.35
  -3  17   2    7.01    3.46
   3 -17  -2    2.41    2.67
   3 -17  -2    3.79    2.76
   3  17  -2    3.44    3.21
   3  17  -2    1.69    3.39
   3  17  -2    3.69    3.11
  -3 -17   1    8.86    3.48
  -3 -17   1    6.80    3.04
  -3  17   1   21.33    5.01
  -3  17   1   13.24    4.33
   3 -17  -1   10.44    3.49
   3 -17  -1   10.07    3.42
   3  17  -1   25.88    5.14
   3  17  -1   26.12    5.29
   3  17  -1   25.64    5.15
  -3 -17   0   69.20    7.09
  -3 -17   0   64.16    6.85
  -3 -17   0   84.69    7.47
  -3  17   0   75.49    7.67
  -3  17   0   82.23    7.94
   3 -17   0   78.72    7.12
   3 -17   0   74.53    6.90
   3  17   0  121.20    8.84
   3  17   0  114.83    8.79
  -3 -17  -1    5.56    3.16
  -3 -17  -1    3.66    2.95
  -3 -17  -1   10.31    3.53
  -3  17  -1    3.26    3.22
  -3  17  -1    4.38    3.37
   3 -17   1    3.20    2.84
   3 -17   1    5.42    2.82
   3  17   1    7.16    4.20
   3  17   1    6.97    3.73
  -3 -17  -2    8.22    3.52
  -3 -17  -2    5.06    2.99
  -3 -17  -2    6.06    3.16
  -3  17  -2    7.06    3.74
  -3  17  -2    3.05    3.27
   3  17   2   13.70    4.86
   3  17   2    9.80    4.68
  -3 -17  -3   24.94    5.15
  -3 -17  -3   27.21    5.43
  -3 -17  -3   42.83    6.09
  -3  17  -3   30.92    5.82
  -3  17  -3   44.98    6.70
   3  17   3   68.92    8.10
   3  17   3   55.03    7.60
  -3 -17  -4   24.15    5.33
  -3 -17  -4   21.16    5.01
  -3 -17  -4   34.74    5.82
  -3  17  -4   30.59    5.73
  -3  17  -4   35.22    6.30
   3  17   4   46.77    7.51
   3  17   4   57.01    8.14
  -3 -17  -5   16.33    4.88
  -3 -17  -5   16.12    4.74
  -3 -17  -5   31.43    5.85
  -3  17  -5   36.09    6.50
  -3  17  -5   26.79    6.18
   3  17   5   51.84    8.16
   3  17   5   55.00    8.33
  -3 -17  -6    2.14    3.05
  -3 -17  -6    1.88    3.13
  -3  17  -6    4.51    3.90
  -3  17  -6    7.60    4.76
   3  17   6    4.26    5.05
   3  17   6   10.39    5.67
  -3 -17  -7    1.05    3.05
  -3 -17  -7    1.15    3.23
  -3  17  -7    2.88    3.75
   3  17   7    2.90    5.09
   3  17   7    4.43    6.27
  -3 -17  -8   13.53    5.16
   3  17   8   24.05    7.93
   3  17   9   -1.42    6.08
  -3  18  10   11.97    6.02
   3 -18 -10   13.97    5.93
  -3  18   9   13.29    5.66
  -3  18   9   13.52    6.15
   3 -18  -9    9.66    5.17
  -3  18   8    2.77    4.09
  -3  18   8    2.70    5.03
   3 -18  -8    0.49    3.38
   3 -18  -8    0.96    3.61
   3  18  -8    1.73    4.50
  -3 -18   7    4.88    4.34
  -3  18   7    3.06    3.65
  -3  18   7    3.93    4.03
   3 -18  -7    5.92    4.27
   3 -18  -7    4.65    3.97
   3  18  -7    3.15    4.74
  -3 -18   6   68.82    7.92
  -3 -18   6   64.86    7.71
  -3  18   6   54.74    7.81
  -3  18   6   47.78    7.52
   3 -18  -6   56.11    7.82
   3 -18  -6   64.61    7.93
   3  18  -6   74.16    8.60
  -3 -18   5   49.83    6.96
  -3 -18   5   49.25    6.75
  -3  18   5   38.53    6.81
  -3  18   5   35.72    6.85
   3 -18  -5   45.58    7.04
   3 -18  -5   36.59    6.31
   3  18  -5   66.27    7.92
  -3 -18   4   12.43    4.53
  -3 -18   4   10.26    3.87
  -3  18   4   10.35    4.62
  -3  18   4   16.44    5.27
   3 -18  -4    9.85    3.95
   3 -18  -4   10.19    3.98
   3  18  -4   26.59    6.05
  -3 -18   3   18.54    4.88
  -3 -18   3   16.52    4.44
  -3  18   3   16.97    4.86
   3 -18  -3   12.57    4.34
   3 -18  -3   15.58    4.44
   3  18  -3   25.15    5.92
  -3 -18   2   80.10    7.84
  -3 -18   2   82.81    7.94
  -3  18   2   87.31    8.51
  -3  18   2   89.87    8.64
   3 -18  -2   83.75    8.10
   3 -18  -2   72.89    7.38
   3  18  -2  117.54    8.77
   3  18  -2  140.39   10.17
   3  18  -2  107.39    8.32
  -3 -18   1   53.05    6.89
  -3 -18   1   54.40    6.63
  -3  18   1   59.98    7.06
  -3  18   1   54.01    7.28
   3 -18  -1   44.93    6.14
   3 -18  -1   49.32    6.12
   3  18  -1   78.26    7.54
   3  18  -1   90.22    8.49
   3  18  -1   69.38    7.22
  -3 -18   0   -0.53    2.00
  -3 -18   0   -1.53    1.61
  -3  18   0   -0.09    2.36
  -3  18   0    1.88    2.97
   3 -18   0   -0.99    2.22
   3 -18   0   -0.66    2.17
   3  18   0    3.31    3.66
   3  18   0    2.30    3.50
  -3 -18  -1    6.56    3.24
  -3 -18  -1    3.43    3.09
  -3 -18  -1    5.58    3.22
  -3  18  -1    3.56    3.28
  -3  18  -1    2.86    3.49
   3 -18   1    2.17    2.84
   3 -18   1    6.35    2.95
   3  18   1    5.02    4.01
   3  18   1    4.43    3.94
  -3 -18  -2   49.30    6.84
  -3 -18  -2   48.33    6.73
  -3 -18  -2   68.83    7.12
  -3  18  -2   59.56    7.24
  -3  18  -2   40.65    6.37
   3  18   2   84.04    8.70
   3  18   2  101.88    9.09
  -3 -18  -3   31.38    5.81
  -3 -18  -3   36.47    6.08
  -3 -18  -3   46.23    6.38
  -3  18  -3   48.24    6.99
  -3  18  -3   37.08    6.56
   3  18   3   65.45    7.96
   3  18   3   78.81    8.87
  -3 -18  -4    5.48    3.39
  -3 -18  -4    3.47    3.32
  -3 -18  -4   13.86    4.49
  -3  18  -4    9.08    4.28
  -3  18  -4   13.30    5.09
   3  18   4   17.38    6.06
   3  18   4   21.00    6.61
  -3 -18  -5    5.91    3.76
  -3 -18  -5   11.54    4.39
  -3  18  -5   17.33    5.19
  -3  18  -5   18.56    5.73
   3  18   5   35.11    7.52
   3  18   5   35.45    7.95
  -3 -18  -6    2.68    3.58
  -3 -18  -6    0.23    2.94
  -3  18  -6   -0.40    3.72
  -3  18  -6    0.72    4.30
   3  18   6    6.67    5.90
   3  18   6    5.97    6.30
  -3 -18  -7   19.43    5.46
  -3 -18  -7   14.06    5.15
   3  18   7   42.41    8.92
  -3 -18  -8   15.99    5.69
   3  18   8   27.30    8.44
  -3  19   9    0.53    4.14
   3 -19  -9   -0.59    4.09
  -3  19   8    1.33    4.14
  -3  19   8    5.31    5.30
   3 -19  -8    1.02    3.60
   3  19  -8    2.04    4.73
  -3  19   7    6.28    4.58
  -3  19   7    2.82    4.70
   3 -19  -7    1.09    3.99
   3 -19  -7    4.75    3.91
   3  19  -7    7.24    5.16
  -3 -19   6   31.53    6.50
  -3 -19   6   30.36    6.12
  -3  19   6   23.90    6.17
  -3  19   6   17.50    5.58
   3 -19  -6   19.95    5.56
   3 -19  -6   24.95    5.94
   3  19  -6   28.14    6.93
  -3 -19   5   14.00    4.98
  -3 -19   5   12.83    4.64
  -3  19   5   16.04    5.48
  -3  19   5   18.50    5.89
   3 -19  -5    8.99    4.32
   3 -19  -5   12.62    4.66
   3  19  -5   17.45    5.76
  -3 -19   4    7.05    3.98
  -3 -19   4    8.07    3.81
  -3  19   4    6.15    4.16
  -3  19   4    6.42    4.19
   3 -19  -4    5.30    3.79
   3 -19  -4    7.49    4.11
   3  19  -4    8.06    4.89
  -3 -19   3   28.28    5.73
  -3 -19   3   26.31    5.41
  -3  19   3   19.20    5.41
   3 -19  -3   19.14    4.99
   3 -19  -3   16.02    4.75
   3  19  -3   36.50    6.80
  -3 -19   2   31.96    5.99
  -3 -19   2   30.13    5.65
  -3  19   2   43.54    7.06
  -3  19   2   46.76    7.21
   3 -19  -2   31.38    5.71
   3 -19  -2   29.16    5.43
   3  19  -2   57.28    6.86
   3  19  -2   81.14    8.49
   3  19  -2   43.24    6.44
  -3 -19   1   49.33    6.83
  -3 -19   1   52.59    7.06
  -3  19   1   54.95    7.80
  -3  19   1   54.88    7.60
   3 -19  -1   56.72    6.86
   3 -19  -1   51.18    6.68
   3  19  -1   79.18    7.92
   3  19  -1   94.14    8.91
   3  19  -1   90.31    8.40
  -3 -19   0    0.51    2.56
  -3 -19   0    1.20    2.29
  -3  19   0    1.56    3.41
  -3  19   0    4.38    3.73
   3 -19   0    1.12    2.49
   3 -19   0   -0.81    2.39
   3  19   0    2.85    3.83
   3  19   0    3.07    4.03
   3  19   0    2.97    3.71
  -3 -19  -1    5.28    3.07
  -3 -19  -1    5.43    3.25
  -3 -19  -1   10.23    3.99
  -3  19  -1    9.30    4.53
  -3  19  -1    9.01    4.43
   3 -19   1    6.10    3.36
   3  19   1   11.53    4.87
   3  19   1    8.89    4.24
  -3 -19  -2   46.75    6.81
  -3 -19  -2   41.77    6.66
  -3 -19  -2   61.63    6.95
  -3  19  -2   57.53    7.83
  -3  19  -2   46.88    7.11
   3  19   2   75.56    8.44
   3  19   2   85.42    9.06
  -3 -19  -3   30.23    6.02
  -3 -19  -3   34.59    6.45
  -3  19  -3   47.38    7.35
  -3  19  -3   44.43    7.07
   3  19   3   72.00    8.89
   3  19   3   65.17    8.76
  -3 -19  -4   13.20    4.70
  -3 -19  -4   14.74    4.95
  -3  19  -4   23.99    5.69
  -3  19  -4   22.06    5.83
   3  19   4   42.18    7.93
   3  19   4   37.64    7.85
  -3 -19  -5    3.14    3.56
  -3 -19  -5    2.13    3.75
  -3  19  -5   10.37    4.88
  -3  19  -5    4.48    4.62
   3  19   5    3.62    5.56
   3  19   5    8.29    6.12
  -3 -19  -6   15.11    5.25
  -3 -19  -6   15.80    5.28
  -3  19  -6   18.14    5.79
   3  19   6   30.72    8.00
  -3 -19  -7   17.45    5.61
   3  19   7   50.41    9.86
  -3  20   9    1.78    4.82
   3 -20  -9    0.84    4.00
  -3  20   8    1.16    4.14
   3 -20  -8   -1.54    2.94
  -3  20   7    0.88    4.03
   3 -20  -7   -0.93    3.45
   3  20  -7    0.44    4.60
  -3 -20   6    4.09    4.67
  -3 -20   6   -0.01    3.71
  -3  20   6    4.62    4.38
  -3  20   6    6.59    5.11
   3 -20  -6    1.84    3.52
   3 -20  -6    4.06    4.17
   3  20  -6    5.09    5.20
  -3 -20   5   33.34    6.58
  -3 -20   5   36.12    6.59
  -3  20   5   24.08    6.24
  -3  20   5   24.84    6.64
   3 -20  -5   21.87    5.95
   3 -20  -5   24.44    6.11
   3  20  -5   39.17    7.61
  -3 -20   4    5.76    4.00
  -3 -20   4    3.49    3.53
  -3  20   4    3.92    4.27
  -3  20   4    5.18    4.19
   3 -20  -4    2.31    3.40
   3 -20  -4    6.60    4.14
   3  20  -4   10.59    5.66
  -3 -20   3   25.22    5.67
  -3 -20   3   30.50    5.86
  -3  20   3   29.62    6.66
  -3  20   3   24.30    6.00
   3 -20  -3   19.58    5.17
   3 -20  -3   22.09    5.41
   3  20  -3   40.62    7.30
  -3 -20   2   50.69    7.26
  -3 -20   2   44.99    6.74
  -3  20   2   49.22    7.71
  -3  20   2   44.81    7.22
   3 -20  -2   42.61    6.69
   3 -20  -2   41.40    6.56
   3  20  -2   81.22    8.80
  -3 -20   1   -1.99    2.40
  -3 -20   1    2.27    2.89
  -3  20   1   -2.28    2.97
  -3  20   1   -0.24    3.33
   3 -20  -1    2.19    3.01
   3 -20  -1    1.20    2.68
   3  20  -1    2.58    3.97
   3  20  -1    0.84    4.12
   3  20  -1   -0.07    3.56
  -3 -20   0    0.78    2.96
  -3 -20   0   -1.74    1.98
  -3  20   0    0.25    3.00
  -3  20   0    4.19    3.85
   3 -20   0   -0.45    2.91
   3 -20   0    0.71    2.72
   3  20   0    4.38    4.32
   3  20   0    3.59    4.22
  -3 -20  -1   16.89    5.00
  -3 -20  -1   15.80    4.70
  -3  20  -1   14.58    5.29
  -3  20  -1   11.78    4.69
   3  20   1   27.35    6.26
   3  20   1   26.07    6.48
  -3 -20  -2   15.87    4.81
  -3 -20  -2    9.32    4.32
  -3  20  -2   13.54    5.18
  -3  20  -2    9.58    4.76
   3  20   2   26.00    6.67
   3  20   2   28.05    6.60
  -3 -20  -3   58.13    8.09
  -3 -20  -3   60.36    8.13
  -3  20  -3   74.95    8.76
  -3  20  -3   91.43    9.61
   3  20   3  128.37   11.52
   3  20   3  127.93   11.46
  -3 -20  -4   24.79    6.01
  -3 -20  -4   22.96    6.25
  -3  20  -4   32.54    6.92
  -3  20  -4   30.39    6.93
   3  20   4   48.61    8.61
   3  20   4   53.88    9.20
  -3 -20  -5    3.54    3.53
  -3 -20  -5    5.92    4.57
  -3  20  -5    7.31    4.51
  -3  20  -5    4.33    5.07
   3  20   5   10.39    5.62
  -3 -20  -6    7.23    4.72
  -3  20  -6    5.12    4.73
   3  20   6   10.94    6.64
  -3 -20  -7   15.94    5.54
   3  20   7   37.13    8.82
  -3  21   8    0.17    4.53
   3 -21  -8    1.58    3.84
  -3  21   7    1.91    4.15
   3 -21  -7    0.23    3.41
  -3 -21   6    6.34    5.30
  -3  21   6    8.03    5.13
   3 -21  -6    4.51    4.59
   3  21  -6    5.34    5.69
  -3 -21   5   -2.59    3.56
  -3 -21   5    2.54    3.68
  -3  21   5    2.16    3.71
  -3  21   5   -0.80    3.95
   3 -21  -5    1.34    3.77
   3 -21  -5    2.63    4.09
   3  21  -5    3.70    4.65
  -3 -21   4    5.93    4.37
  -3 -21   4    4.33    3.83
  -3  21   4    4.70    4.47
  -3  21   4    4.86    3.87
   3 -21  -4    3.89    4.02
   3 -21  -4    3.41    3.73
   3  21  -4    5.14    4.99
  -3 -21   3   17.46    5.50
  -3 -21   3   19.48    5.26
  -3  21   3   24.36    6.44
  -3  21   3   19.73    5.87
   3 -21  -3   16.34    5.30
   3 -21  -3   15.84    5.17
   3  21  -3   26.08    6.77
  -3 -21   2   25.04    6.03
  -3 -21   2   20.45    5.24
  -3  21   2   24.67    6.53
  -3  21   2   34.62    7.13
   3 -21  -2   30.94    6.26
   3 -21  -2   34.15    6.33
  -3 -21   1    0.23    3.00
  -3 -21   1    0.39    2.47
  -3  21   1    4.63    4.12
  -3  21   1   -0.93    3.11
   3 -21  -1    0.72    3.21
   3 -21  -1    1.72    2.91
   3  21  -1    0.53    3.99
   3  21  -1   -0.90    4.09
  -3 -21   0   16.66    5.26
  -3 -21   0    8.82    4.01
  -3  21   0   15.94    5.47
  -3  21   0   14.93    5.16
   3 -21   0    9.43    4.28
   3 -21   0   13.51    4.50
   3  21   0   28.13    6.54
   3  21   0   26.26    6.28
  -3 -21  -1    8.22    4.36
  -3 -21  -1    6.30    3.79
  -3  21  -1    9.36    5.04
  -3  21  -1    6.81    4.64
   3  21   1   11.41    5.17
   3  21   1    8.41    5.57
  -3 -21  -2   38.88    6.85
  -3 -21  -2   35.54    6.89
  -3  21  -2   50.86    7.96
   3  21   2   76.45    9.18
   3  21   2   76.84    9.44
  -3 -21  -3    2.57    3.44
  -3 -21  -3    7.40    4.29
  -3  21  -3    9.91    4.87
  -3  21  -3    9.29    5.14
   3  21   3   21.30    7.07
   3  21   3   14.26    6.06
  -3 -21  -4    8.85    4.45
  -3  21  -4    8.69    4.90
  -3  21  -4   13.21    5.65
   3  21   4   21.99    7.26
   3  21   4   18.81    7.03
  -3 -21  -5    9.46    4.66
  -3  21  -5   12.05    5.46
  -3  21  -5    6.62    6.11
   3  21   5   14.57    6.57
  -3 -21  -6   19.76    6.01
   3  21   6   63.83   10.69
  -3  22   7    5.39    5.05
   3 -22  -7   -1.35    3.98
  -3 -22   6    7.20    5.44
  -3  22   6    6.48    5.04
   3 -22  -6    4.53    4.36
   3  22  -6    2.18    5.48
  -3 -22   5   -2.67    3.65
  -3 -22   5    4.31    4.57
  -3  22   5    0.08    3.96
   3 -22  -5    1.94    4.06
   3  22  -5    6.31    5.06
  -3 -22   4   10.45    5.24
  -3 -22   4   10.29    4.72
  -3  22   4   12.67    5.46
  -3  22   4    8.94    5.13
   3 -22  -4    6.54    4.44
   3 -22  -4   10.83    5.49
  -3 -22   3   24.12    6.22
  -3 -22   3   19.91    5.48
  -3  22   3   21.50    6.25
  -3  22   3   13.94    6.27
   3 -22  -3   20.77    5.87
   3 -22  -3   14.71    5.25
  -3 -22   2   57.99    8.31
  -3 -22   2   76.43    9.05
  -3  22   2   62.97    9.17
   3 -22  -2   60.21    8.20
   3 -22  -2   55.55    7.78
  -3 -22   1   -2.74    2.60
  -3 -22   1    1.26    3.31
  -3  22   1    3.28    4.45
  -3  22   1   -0.65    4.04
   3 -22  -1   -0.08    3.17
   3 -22  -1    1.31    3.47
   3  22  -1    1.64    4.24
  -3 -22   0    5.77    3.84
  -3 -22   0    7.93    4.75
  -3  22   0    6.07    4.50
  -3  22   0    7.38    4.94
   3 -22   0    9.49    4.40
   3 -22   0   10.97    4.74
   3  22   0   11.97    5.60
   3  22   0   14.03    6.00
  -3 -22  -1   21.52    5.71
  -3 -22  -1   19.15    5.79
  -3  22  -1   21.59    6.56
   3  22   1   26.38    6.81
   3  22   1   27.59    7.09
  -3 -22  -2   13.19    5.02
  -3  22  -2   16.20    5.73
  -3  22  -2   10.09    5.37
   3  22   2   24.92    6.84
   3  22   2   14.88    6.86
  -3 -22  -3    7.10    4.15
  -3  22  -3   13.70    5.59
  -3  22  -3   13.92    5.90
   3  22   3   26.82    7.48
   3  22   3   27.20    7.99
  -3 -22  -4    2.21    3.38
  -3  22  -4    3.21    4.40
  -3  22  -4   -0.19    5.44
   3  22   4    4.16    5.66
  -3 -22  -5   12.89    5.43
  -3  22  -5   15.84    5.89
   3  22   5   15.57    7.32
  -3  23   6    2.16    4.92
   3 -23  -6    1.88    4.27
  -3 -23   5   -2.44    4.07
  -3 -23   5    9.11    5.66
  -3  23   5    6.42    5.55
   3 -23  -5    5.54    4.77
  -3 -23   4   10.64    5.55
  -3 -23   4    3.17    4.92
  -3  23   4    4.34    5.09
   3 -23  -4    1.90    4.17
  -3 -23   3   70.90    9.53
  -3 -23   3   69.91    9.32
  -3  23   3   84.51    9.90
   3 -23  -3   51.60    8.27
   3 -23  -3   68.24    9.31
  -3 -23   2   16.22    5.70
  -3 -23   2   19.39    6.17
  -3  23   2    6.58    4.97
   3 -23  -2    9.77    5.00
   3 -23  -2    9.37    5.23
  -3 -23   1   32.65    6.87
  -3  23   1   38.79    8.20
  -3  23   1   39.72    8.24
   3 -23  -1   43.10    7.43
   3 -23  -1   31.38    6.54
   3  23  -1   50.01    8.33
  -3 -23   0    4.60    4.13
  -3  23   0    9.34    5.26
  -3  23   0    6.33    5.58
   3 -23   0    7.75    4.53
   3  23   0   14.80    6.27
   3  23   0   16.92    6.78
  -3 -23  -1   20.28    6.17
  -3  23  -1   26.36    6.90
  -3  23  -1   18.74    6.70
   3  23   1   38.06    7.80
   3  23   1   37.94    8.55
  -3 -23  -2    3.11    3.98
  -3  23  -2    7.51    5.17
  -3  23  -2   -0.88    4.13
   3  23   2    6.08    5.27
  -3 -23  -3   14.82    5.36
  -3  23  -3   17.32    6.28
   3  23   3   26.31    7.39
  -3 -23  -4    5.35    4.08
  -3  23  -4    7.90    5.11
   3  23   4   25.75    7.93
  -3 -24   5    4.19    5.51
  -3  24   5    6.67    5.60
   3 -24  -5    3.14    4.49
  -3 -24   4    7.10    5.42
  -3  24   4    2.96    5.07
   3 -24  -4    1.24    4.20
  -3 -24   3   13.23    5.89
  -3  24   3    7.42    5.53
   3 -24  -3    2.08    4.04
  -3 -24   2   79.56    9.79
  -3  24   2   85.93   10.69
   3 -24  -2   70.55    9.54
  -3 -24   1    7.15    4.93
  -3  24   1    2.37    4.80
   3 -24  -1    4.33    4.26
   3 -24  -1    3.37    4.77
  -3 -24   0   -2.07    3.35
  -3  24   0    0.08    4.46
   3  24   0    2.46    5.11
   3  24   0   -2.56    5.49
  -3 -24  -1    6.69    4.94
  -3  24  -1    8.83    5.32
   3  24   1    7.87    5.88
  -3 -24  -2   27.40    6.62
  -3  24  -2   42.34    8.28
   3  24   2   46.47    9.04
  -3 -24  -3   10.86    5.22
  -3  24  -3   14.30    6.41
   3  24   3   16.25    6.83
  -3 -25   2    4.94    4.80
  -3  25   2    5.16    5.41
   3 -25  -2    5.03    4.87
  -3 -25   1   10.05    5.47
  -3  25   1   15.67    6.21
   3 -25  -1   10.55    5.42
  -3 -25   0   -1.19    3.74
  -3  25   0   -0.83    4.58
   3  25   0   -1.19    5.20
   4   0 -13    0.74    4.36
   4   0 -12    2.90    4.23
  -4   0  11   20.94    5.80
   4   0 -11   16.47    4.87
   4   0 -11    7.91    4.23
  -4   0  10    5.69    3.87
   4   0 -10    4.46    3.67
   4   0 -10   -0.88    2.80
  -4   0   9    1.07    3.07
  -4   0   9    3.01    2.96
   4   0  -9    1.56    2.80
  -4   0   8   42.41    5.52
  -4   0   8   39.16    5.42
   4   0  -8   18.38    3.89
  -4   0   7    1.79    2.57
  -4   0   7   -0.11    2.04
   4   0  -7   -0.21    1.70
  -4   0   6  112.49    7.15
  -4   0   6  103.26    6.71
   4   0  -6   88.77    5.59
  -4   0   5   18.38    3.33
  -4   0   5   19.48    3.25
  -4   0   5   13.61    1.63
   4   0  -5   18.81    2.85
  -4   0   4  170.56    7.65
  -4   0   4  171.10    7.53
  -4   0   4  128.45    4.03
   4   0  -4  198.79    6.95
  -4   0   3   83.47    5.15
  -4   0   3   49.50    2.77
   4   0  -3   91.27    4.55
  -4   0   2  115.67    5.46
  -4   0   2   64.97    3.67
  -4   0   2   96.75    4.17
  -4   0   1   45.26    3.32
  -4   0   1    6.20    1.38
  -4   0   1    2.87    0.99
  -4   0   0    3.69    1.29
  -4   0   0    2.97    1.28
  -4   0   0    3.56    1.47
  -4   0  -1  157.39    5.24
  -4   0  -1  115.45    5.61
  -4   0  -1  156.26    6.76
  -4   0  -2  230.69    8.83
  -4   0  -2  235.23    5.96
  -4   0  -2  150.40    6.93
  -4   0  -2  227.74    8.73
  -4   0  -3    1.24    1.00
  -4   0  -3    1.42    1.59
  -4   0  -3    5.82    2.17
  -4   0  -4    0.19    1.44
  -4   0  -4    0.39    1.74
  -4   0  -4    0.49    1.60
  -4   0  -5   -0.58    1.56
  -4   0  -5    0.60    2.01
  -4   0  -5    2.29    2.45
  -4   0  -6   92.98    7.55
  -4   0  -6   53.13    5.88
  -4   0  -6   94.90    7.58
  -4   0  -7   13.61    4.04
  -4   0  -7   11.97    4.18
  -4   0  -7   20.71    4.88
  -4   0  -8    3.90    3.39
  -4   0  -8    2.52    3.00
  -4   0  -8    2.05    3.09
  -4   0  -9    8.30    4.18
  -4   0  -9    4.28    3.53
  -4   0  -9   18.22    5.47
  -4   0 -10   33.77    6.68
  -4   0 -10   18.27    5.71
   4   0  10   40.81    8.16
  -4   0 -11    2.88    3.85
   4   0  11   -5.02    6.05
   4   1 -13    1.23    4.51
  -4   1  12   24.27    6.44
   4  -1 -12    7.26    4.43
   4   1 -12    5.57    4.63
  -4  -1  11   13.22    5.04
  -4   1  11   10.75    4.64
   4  -1 -11   13.42    4.84
   4  -1 -11    1.87    3.58
   4   1 -11    1.24    3.59
  -4  -1  10    3.18    3.68
  -4   1  10    0.74    3.36
   4  -1 -10    5.01    3.35
   4  -1 -10    0.18    3.13
   4   1 -10    1.89    3.20
  -4  -1   9    0.47    3.26
  -4  -1   9   -0.48    2.45
  -4   1   9   -0.56    2.85
   4  -1  -9   -1.09    2.66
   4  -1  -9    2.23    2.74
   4   1  -9    0.21    2.52
  -4  -1   8  109.87    7.98
  -4  -1   8  105.69    7.59
  -4   1   8  117.78    8.33
  -4   1   8  109.98    7.85
   4  -1  -8   53.39    5.39
   4   1  -8   54.19    5.64
  -4  -1   7  131.53    8.09
  -4  -1   7  132.63    8.09
  -4   1   7  126.18    8.14
  -4   1   7  115.17    7.58
   4  -1  -7   68.52    5.34
   4   1  -7   86.58    6.27
  -4  -1   6   89.75    6.45
  -4  -1   6   89.13    6.24
  -4   1   6  100.54    6.92
  -4   1   6  109.07    6.95
  -4   1   6   71.89    3.51
   4  -1  -6   67.54    4.77
   4   1  -6   87.00    5.81
  -4  -1   5   53.98    4.91
  -4  -1   5   54.81    4.73
  -4  -1   5   38.44    1.84
  -4   1   5   60.25    5.13
  -4   1   5   55.61    4.85
  -4   1   5   37.65    2.67
   4  -1  -5   52.74    3.95
   4   1  -5   59.47    4.53
  -4  -1   4  318.27   10.22
  -4  -1   4  300.78    9.85
  -4   1   4  315.05   10.15
  -4   1   4  309.29   10.10
  -4   1   4  233.48    5.95
   4  -1  -4  362.55    8.82
   4   1  -4  358.72    9.68
  -4  -1   3  226.95    8.13
  -4  -1   3  205.88    5.07
  -4   1   3  259.09    8.72
  -4   1   3  180.14    5.47
   4  -1  -3  285.59    7.37
   4   1  -3  277.60    8.10
  -4  -1   2   50.16    3.78
  -4  -1   2   39.31    3.08
  -4  -1   2   49.03    2.93
  -4   1   2   61.67    4.18
  -4   1   2   41.38    2.83
  -4   1   2   49.95    3.26
  -4  -1   1   49.87    3.62
  -4  -1   1   36.50    3.05
  -4  -1   1   33.28    2.71
  -4   1   1   62.60    3.87
  -4   1   1   38.52    2.83
  -4   1   1   53.58    3.56
  -4  -1   0   39.45    2.94
  -4  -1   0   50.10    3.65
  -4  -1   0   70.83    4.31
  -4   1   0   67.36    3.69
  -4   1   0    8.63    1.59
  -4   1   0   57.70    4.02
  -4  -1  -1  310.18    9.34
  -4  -1  -1  404.73   10.72
  -4   1  -1  428.20    8.21
  -4   1  -1  290.01    8.64
  -4   1  -1  400.83   10.80
  -4  -1  -2  317.94   10.30
  -4  -1  -2  325.30    7.48
  -4  -1  -2  239.86    8.84
  -4  -1  -2  317.79   10.28
  -4   1  -2  324.28   10.33
  -4   1  -2  348.18    6.72
  -4   1  -2  234.61    8.47
  -4   1  -2  310.46   10.22
  -4  -1  -3    9.15    1.60
  -4  -1  -3    5.28    2.07
  -4  -1  -3   10.34    2.79
  -4   1  -3    8.86    2.51
  -4   1  -3    8.52    1.27
  -4   1  -3    5.31    2.11
  -4   1  -3    7.40    2.41
  -4  -1  -4   61.00    5.49
  -4  -1  -4   41.03    4.68
  -4  -1  -4   60.21    5.44
  -4   1  -4   62.70    5.55
  -4   1  -4   38.68    4.46
  -4   1  -4   63.63    5.57
  -4  -1  -5   41.85    5.09
  -4  -1  -5   34.38    4.84
  -4  -1  -5   49.94    5.42
  -4   1  -5   35.49    4.80
  -4   1  -5   25.56    4.30
  -4   1  -5   32.46    4.71
  -4  -1  -6   31.85    5.03
  -4  -1  -6   23.27    4.61
  -4  -1  -6   38.64    5.50
  -4   1  -6   24.46    4.60
  -4   1  -6   12.28    3.69
  -4   1  -6   29.57    5.08
  -4  -1  -7   71.57    7.07
  -4  -1  -7   46.57    6.30
  -4  -1  -7   77.42    7.36
  -4   1  -7   73.60    7.17
  -4   1  -7   44.97    6.20
  -4   1  -7   65.83    7.06
  -4  -1  -8    0.41    2.36
  -4  -1  -8   -0.80    2.48
  -4  -1  -8    1.25    3.21
  -4   1  -8    0.80    3.03
  -4   1  -8   -0.79    2.29
  -4   1  -8    0.43    3.23
  -4  -1  -9   15.61    4.89
  -4  -1  -9    5.63    3.60
  -4   1  -9   15.42    4.97
  -4   1  -9    3.48    3.33
  -4   1  -9   14.88    5.20
  -4  -1 -10   24.44    6.07
  -4  -1 -10   13.87    5.50
  -4   1 -10   27.65    6.45
  -4   1 -10    8.87    4.98
   4   1  10   37.54    8.43
  -4  -1 -11    6.28    4.64
  -4   1 -11    5.38    4.70
   4   1  11    8.99    6.95
   4   2 -13   -0.60    4.11
  -4   2  12   14.25    5.80
   4   2 -12    9.27    5.07
  -4  -2  11   37.45    6.60
  -4   2  11   34.43    6.29
   4  -2 -11   27.65    5.84
   4  -2 -11   12.65    4.56
   4   2 -11   13.72    4.84
  -4  -2  10   13.85    4.68
  -4  -2  10    9.94    4.01
  -4   2  10    8.56    4.27
   4  -2 -10    7.18    3.76
   4  -2 -10    5.54    3.56
   4   2 -10    6.78    3.92
  -4  -2   9   56.27    6.46
  -4  -2   9   48.49    6.06
  -4   2   9   59.26    6.91
   4  -2  -9   57.52    6.68
   4  -2  -9   26.39    4.57
   4   2  -9   23.08    4.81
  -4  -2   8  164.75    9.45
  -4  -2   8  148.89    8.99
  -4   2   8  170.76    9.83
   4  -2  -8  181.74    9.87
   4  -2  -8   75.63    6.06
   4   2  -8   89.06    7.03
  -4  -2   7  547.38   15.57
  -4  -2   7  526.75   15.28
  -4   2   7  585.28   16.45
  -4   2   7  575.05   16.21
   4  -2  -7  279.66   10.00
   4   2  -7  406.70   13.07
  -4  -2   6  272.68   10.64
  -4  -2   6  255.37   10.17
  -4   2   6  286.27   11.10
  -4   2   6  275.68   10.74
   4  -2  -6  174.62    7.20
   4   2  -6  259.72    9.82
  -4  -2   5   34.71    3.99
  -4  -2   5   38.35    4.19
  -4   2   5   41.17    4.43
  -4   2   5   51.01    4.96
  -4   2   5   33.97    2.76
   4  -2  -5   43.55    3.44
   4   2  -5   52.32    4.50
  -4  -2   4  467.22   12.41
  -4  -2   4  467.46   12.34
  -4  -2   4  415.15    5.50
  -4   2   4  544.58   13.46
  -4   2   4  513.73   12.96
  -4   2   4  387.86    8.35
   4  -2  -4  569.43   10.45
   4   2  -4  597.44   12.94
  -4  -2   3 1585.14   21.53
  -4  -2   3 1478.98   13.22
  -4   2   3 1812.09   22.79
  -4   2   3 1379.06   16.15
   4  -2  -3 2042.54   18.54
  -4  -2   2   40.59    3.49
  -4  -2   2   27.79    2.77
  -4  -2   2   37.90    2.60
  -4   2   2   29.23    3.18
  -4   2   2   21.14    2.00
  -4   2   2   17.39    2.17
  -4  -2   1  215.56    7.27
  -4  -2   1  156.37    6.26
  -4  -2   1  211.85    6.46
  -4   2   1  157.64    5.88
  -4   2   1  162.24    5.25
  -4   2   1  203.88    6.93
  -4  -2   0   31.51    2.79
  -4  -2   0   31.67    3.10
  -4  -2   0   45.38    3.56
  -4   2   0   62.82    3.57
  -4   2   0   37.26    2.88
  -4   2   0   57.23    4.12
  -4  -2  -1  704.74   12.06
  -4  -2  -1  529.91   12.45
  -4  -2  -1  714.45   14.28
  -4   2  -1  687.60   14.32
  -4   2  -1  829.95   11.16
  -4   2  -1  504.40   11.10
  -4   2  -1  686.16   14.34
  -4  -2  -2  156.47    7.36
  -4  -2  -2  161.29    5.72
  -4  -2  -2  120.95    6.52
  -4  -2  -2  170.33    7.64
  -4   2  -2  149.89    6.99
  -4   2  -2  169.55    4.49
  -4   2  -2   99.79    5.59
  -4   2  -2  145.89    7.15
  -4  -2  -3   75.29    4.74
  -4  -2  -3   58.01    3.55
  -4  -2  -3   43.44    4.40
  -4  -2  -3   50.07    4.71
  -4   2  -3   54.47    4.81
  -4   2  -3   43.42    4.18
  -4   2  -3   55.15    4.94
  -4  -2  -4   52.46    5.09
  -4  -2  -4   39.22    4.67
  -4  -2  -4   56.95    5.37
  -4   2  -4   50.34    5.06
  -4   2  -4   36.94    4.62
  -4   2  -4   46.37    4.85
  -4  -2  -5  364.42   13.50
  -4  -2  -5  262.15   11.52
  -4  -2  -5  373.11   13.76
  -4   2  -5  357.14   13.21
  -4   2  -5  218.06   10.41
  -4   2  -5  365.52   13.48
  -4  -2  -6  145.34    9.20
  -4  -2  -6  106.15    8.02
  -4  -2  -6  152.32    9.60
  -4   2  -6  157.79    9.48
  -4   2  -6   98.88    7.85
  -4   2  -6  162.13    9.62
  -4  -2  -7   19.89    4.72
  -4  -2  -7   12.32    4.11
  -4  -2  -7   20.63    4.82
  -4   2  -7   19.15    4.62
  -4   2  -7   10.72    3.88
  -4   2  -7   22.20    4.98
  -4  -2  -8    3.22    3.13
  -4  -2  -8    0.16    2.31
  -4   2  -8    3.37    3.49
  -4   2  -8    3.47    3.38
  -4   2  -8    0.63    3.22
  -4  -2  -9   24.73    5.71
  -4  -2  -9   13.77    4.87
  -4   2  -9   32.39    6.34
  -4   2  -9   15.01    5.25
  -4   2  -9   28.18    6.27
   4   2   9   42.89    7.60
  -4  -2 -10   19.12    5.76
  -4  -2 -10    5.32    4.47
  -4   2 -10   10.53    4.99
  -4   2 -10    9.42    5.17
  -4   2 -10   15.36    5.99
   4   2  10   19.27    7.29
  -4  -2 -11   12.21    5.22
  -4   2 -11    8.08    4.92
   4   2  11   12.55    7.41
   4   3 -13   -0.04    5.12
   4   3 -12   15.36    5.50
  -4  -3  11   45.56    7.10
  -4  -3  11   39.61    6.42
  -4   3  11   30.86    6.30
   4  -3 -11   46.53    6.94
   4   3 -11   13.02    4.88
  -4  -3  10   12.65    4.58
  -4  -3  10   13.49    4.33
  -4   3  10   21.08    5.32
   4  -3 -10   15.76    4.61
   4  -3 -10    6.17    3.57
   4   3 -10    4.97    3.70
  -4  -3   9   50.22    6.26
  -4  -3   9   50.62    5.88
  -4   3   9   68.91    7.36
   4  -3  -9   63.51    6.75
   4  -3  -9   24.37    4.50
   4   3  -9   34.74    5.54
  -4  -3   8  436.02   14.69
  -4  -3   8  433.20   14.63
  -4   3   8  461.20   15.63
   4  -3  -8  495.54   16.08
   4  -3  -8  189.84    8.98
   4   3  -8  271.10   11.88
  -4  -3   7  333.15   12.39
  -4  -3   7  332.48   12.33
  -4   3   7  349.11   13.03
   4  -3  -7  401.28   13.78
   4  -3  -7  169.11    7.67
   4   3  -7  268.01   10.94
  -4  -3   6  515.86   14.38
  -4  -3   6  522.29   14.53
  -4   3   6  572.85   15.61
   4  -3  -6  288.80    8.83
   4   3  -6  515.56   14.12
  -4  -3   5  188.63    8.52
  -4  -3   5  197.39    8.61
  -4   3   5  226.54    9.42
  -4   3   5  218.40    9.20
  -4   3   5  153.99    5.84
   4  -3  -5  166.22    6.03
   4   3  -5  216.89    8.79
  -4  -3   4 1569.94   22.80
  -4  -3   4 1542.17   22.55
  -4   3   4 1733.30   24.04
  -4   3   4 1630.00   23.25
  -4   3   4 1251.25   16.20
   4  -3  -4 1807.76   17.60
   4   3  -4 1815.08   23.46
  -4  -3   3  952.80   16.99
  -4  -3   3  928.44   16.81
  -4  -3   3  986.93   10.36
  -4   3   3 1209.80   18.94
  -4   3   3 1187.61   18.68
  -4   3   3  878.11   13.72
   4  -3  -3 1229.14   13.26
  -4  -3   2  516.15   12.01
  -4  -3   2  396.26   10.23
  -4  -3   2  549.95    9.11
  -4   3   2  610.43   12.51
  -4   3   2  396.53    7.23
  -4   3   2  400.56    9.56
  -4  -3   1   33.92    3.22
  -4  -3   1   20.97    2.78
  -4  -3   1   27.14    2.63
  -4   3   1   16.90    1.81
  -4   3   1   22.46    2.64
  -4  -3   0  336.45    9.00
  -4  -3   0  269.79    8.75
  -4  -3   0  369.88    9.52
  -4   3   0  479.48    9.44
  -4   3   0  282.04    7.33
  -4   3   0  357.24   10.00
  -4  -3  -1  283.43    8.14
  -4  -3  -1  218.11    8.25
  -4  -3  -1  307.81    9.55
  -4   3  -1  242.44    8.82
  -4   3  -1  314.78    6.88
  -4   3  -1  250.87    8.89
  -4  -3  -2  391.74   11.56
  -4  -3  -2  359.97    8.98
  -4  -3  -2  291.70   10.12
  -4  -3  -2  395.87   11.62
  -4   3  -2  389.68   11.51
  -4   3  -2  274.23    8.99
  -4   3  -2  380.79   11.60
  -4  -3  -3   33.31    3.66
  -4  -3  -3   25.88    2.71
  -4  -3  -3   18.96    3.34
  -4  -3  -3   28.05    3.99
  -4   3  -3   21.66    3.54
  -4   3  -3   14.55    2.84
  -4   3  -3   25.45    3.76
  -4  -3  -4  166.58    8.64
  -4  -3  -4  156.70    6.12
  -4  -3  -4  119.93    7.58
  -4  -3  -4  170.82    8.90
  -4   3  -4  147.18    8.24
  -4   3  -4   96.29    6.57
  -4   3  -4  151.05    8.34
  -4  -3  -5  116.39    7.94
  -4  -3  -5   77.30    6.59
  -4  -3  -5  118.51    8.06
  -4   3  -5  115.14    7.75
  -4   3  -5   84.68    6.83
  -4   3  -5  122.58    8.12
  -4  -3  -6  195.53   10.63
  -4  -3  -6  141.67    9.16
  -4   3  -6  180.21   10.22
  -4   3  -6  112.18    8.15
  -4   3  -6  183.01   10.31
  -4  -3  -7   21.04    4.88
  -4  -3  -7   19.26    4.55
  -4   3  -7   15.92    4.34
  -4   3  -7    9.99    3.72
  -4   3  -7   16.80    4.56
   4   3   7   25.02    5.97
  -4  -3  -8    4.73    3.56
  -4  -3  -8    2.04    2.67
  -4   3  -8    0.48    2.81
  -4   3  -8    0.92    2.80
  -4   3  -8    2.69    3.43
   4   3   8    1.78    4.48
  -4  -3  -9   25.99    6.07
  -4  -3  -9    9.92    4.27
  -4   3  -9   21.67    5.50
  -4   3  -9   10.58    4.77
  -4   3  -9   17.60    5.56
   4   3   9   23.71    6.89
  -4  -3 -10   35.24    6.64
  -4  -3 -10   22.40    6.28
  -4   3 -10   37.78    7.09
  -4   3 -10   25.61    6.65
  -4   3 -10   43.57    7.78
   4   3  10   48.80    9.06
  -4  -3 -11    8.66    4.52
  -4   3 -11   12.12    5.54
  -4   3 -11   12.35    6.37
   4   3  11   16.38    7.51
   4   4 -13    1.53    5.34
   4  -4 -12   19.45    5.54
   4   4 -12    5.96    4.98
   4  -4 -11  121.98   10.14
   4   4 -11   51.61    7.50
  -4  -4  10   10.18    4.48
  -4  -4  10   13.35    4.30
  -4   4  10   10.20    4.57
   4  -4 -10   13.68    4.40
   4   4 -10   -0.56    2.78
  -4  -4   9   69.00    7.10
  -4  -4   9   64.27    6.67
  -4   4   9   52.69    6.68
   4  -4  -9   63.01    6.98
   4  -4  -9   28.12    4.54
   4   4  -9   36.53    5.59
  -4  -4   8  158.67    9.32
  -4  -4   8  143.23    8.89
  -4   4   8  170.70   10.11
   4  -4  -8  173.57   10.10
   4  -4  -8   73.04    5.85
   4   4  -8  105.97    7.77
  -4  -4   7  472.30   14.65
  -4  -4   7  485.60   14.77
  -4   4   7  541.91   16.28
  -4   4   7  300.02    9.36
   4  -4  -7  526.32   15.89
   4  -4  -7  218.78    8.37
   4   4  -7  422.90   14.12
  -4  -4   6  110.69    7.18
  -4  -4   6  103.63    6.88
  -4   4   6  124.28    7.93
  -4   4   6   78.26    4.79
   4  -4  -6  126.58    7.85
   4  -4  -6   56.55    4.11
   4   4  -6  134.22    7.70
  -4  -4   5   38.79    4.44
  -4  -4   5   38.98    4.21
  -4   4   5   49.73    5.11
  -4   4   5   37.70    3.41
   4  -4  -5   52.38    5.05
   4  -4  -5   25.50    2.59
   4   4  -5   41.80    4.47
  -4  -4   4  367.53   11.35
  -4  -4   4  362.43   11.27
  -4   4   4  528.90   13.66
  -4   4   4  367.00    9.45
   4  -4  -4  467.44   12.77
   4  -4  -4  383.28    7.46
   4   4  -4  549.96   13.43
  -4  -4   3 1251.86   19.93
  -4  -4   3 1226.22   19.67
  -4   4   3 1440.78   20.94
   4  -4  -3 1690.40   14.48
   4   4  -3 1647.57   14.12
  -4  -4   2  318.80    9.77
  -4  -4   2  329.15    9.90
  -4  -4   2  264.51    8.74
  -4   4   2  239.79    5.14
  -4   4   2  266.51    8.25
  -4  -4   1   18.11    2.54
  -4  -4   1   11.50    2.26
  -4  -4   1   13.98    2.11
  -4   4   1   11.18    1.44
  -4   4   1   13.82    2.36
  -4  -4   0  798.48   14.48
  -4  -4   0  622.50   13.65
  -4  -4   0  893.82   14.97
  -4   4   0  753.11   14.87
  -4   4   0  594.91   10.34
  -4   4   0  762.12   15.01
  -4  -4  -1  927.38   16.69
  -4  -4  -1  678.38   14.84
  -4  -4  -1 1000.35   17.28
  -4   4  -1  891.39   17.01
  -4   4  -1  682.76   12.57
  -4   4  -1  912.07   17.20
   4  -4   1 1157.73   13.49
  -4  -4  -2  190.45    8.23
  -4  -4  -2  170.57    6.66
  -4  -4  -2  134.25    7.06
  -4  -4  -2  192.12    8.28
  -4   4  -2  143.01    7.20
  -4   4  -2  112.63    5.86
  -4   4  -2  152.25    7.52
   4  -4   2  214.30    4.97
  -4  -4  -3   30.98    3.85
  -4  -4  -3   28.94    3.11
  -4  -4  -3   25.91    3.86
  -4  -4  -3   35.69    4.21
  -4   4  -3   28.79    3.97
  -4   4  -3   21.45    3.28
  -4   4  -3   29.72    4.08
  -4  -4  -4   13.46    3.16
  -4  -4  -4    6.83    1.90
  -4  -4  -4   11.04    3.04
  -4  -4  -4   13.75    3.38
  -4   4  -4   12.56    3.23
  -4   4  -4   11.19    3.03
  -4   4  -4   15.97    3.67
  -4  -4  -5  321.24   12.91
  -4  -4  -5  230.49   11.01
  -4   4  -5  269.04   11.68
  -4   4  -5  172.07    9.34
  -4   4  -5  287.86   12.18
  -4  -4  -6   90.29    7.62
  -4  -4  -6   51.69    5.85
  -4   4  -6   90.38    7.45
  -4   4  -6   57.79    6.10
  -4   4  -6   92.97    7.55
   4   4   6  144.28    9.96
  -4  -4  -7   42.00    6.12
  -4  -4  -7   27.75    5.26
  -4   4  -7   37.43    5.73
  -4   4  -7   15.23    4.35
  -4   4  -7   37.33    5.82
   4   4   7   62.95    8.01
  -4  -4  -8   -0.34    2.31
  -4  -4  -8    2.93    2.87
  -4   4  -8   -0.70    2.91
  -4   4  -8    0.52    2.77
  -4   4  -8   -1.65    3.12
   4   4   8    0.12    4.04
  -4  -4  -9   82.72    8.65
  -4  -4  -9   56.50    7.76
  -4   4  -9   95.95    9.28
  -4   4  -9   51.49    7.59
  -4   4  -9  105.20    9.69
   4   4   9  126.97   11.48
  -4  -4 -10    9.33    4.65
  -4  -4 -10   10.73    5.44
  -4   4 -10   13.11    5.22
  -4   4 -10    7.18    5.07
  -4   4 -10   12.34    5.50
   4   4  10   19.18    7.35
  -4  -4 -11    2.05    3.95
  -4   4 -11    1.87    4.25
   4   4  11    2.62    7.03
   4   5 -13   -1.39    4.99
   4  -5 -12   -2.90    3.66
   4  -5 -12    4.31    4.65
   4   5 -12    1.38    3.96
   4  -5 -11   43.62    7.01
   4  -5 -11   47.52    7.06
   4   5 -11   21.51    5.73
  -4  -5  10   89.97    8.34
  -4  -5  10   79.46    7.71
   4  -5 -10   76.02    7.83
   4   5 -10   34.63    6.07
  -4  -5   9    3.04    3.24
  -4  -5   9    7.00    3.46
  -4   5   9   11.38    4.30
   4  -5  -9    4.63    3.47
   4   5  -9    5.24    3.46
  -4  -5   8  169.20    9.64
  -4  -5   8  156.08    9.21
  -4   5   8  187.91   10.69
   4  -5  -8  173.41   10.13
   4  -5  -8   82.33    5.91
   4   5  -8  123.73    8.51
  -4  -5   7   56.63    5.90
  -4  -5   7   69.23    6.29
  -4   5   7   75.22    6.98
  -4   5   7   28.24    3.56
   4  -5  -7   85.63    7.18
   4  -5  -7   35.24    3.88
   4   5  -7   64.00    6.32
  -4  -5   6  107.10    7.10
  -4  -5   6  107.96    7.15
  -4   5   6  137.39    8.37
  -4   5   6   69.64    4.75
   4  -5  -6  126.14    7.83
   4  -5  -6   62.21    4.15
   4   5  -6  117.48    7.40
  -4  -5   5    7.81    2.54
  -4  -5   5    3.26    2.03
  -4   5   5   12.53    3.10
  -4   5   5    5.91    1.94
   4  -5  -5    4.24    2.22
   4  -5  -5    4.62    1.43
   4   5  -5   44.94    4.79
  -4  -5   4  283.73   10.20
  -4  -5   4  274.58    9.98
  -4   5   4  326.44   11.03
  -4   5   4  114.09    5.63
   4  -5  -4  321.51   10.82
   4  -5  -4  192.62    4.83
   4   5  -4  308.06   10.49
  -4  -5   3  330.10   10.62
  -4  -5   3  310.64   10.24
  -4   5   3  388.96   11.35
  -4   5   3  279.75    8.77
   4  -5  -3  397.52   11.36
   4  -5  -3  440.67    6.27
   4   5  -3  440.33    7.42
  -4  -5   2  132.36    6.71
  -4  -5   2  121.14    6.38
  -4  -5   2  109.77    5.93
  -4   5   2  124.89    3.29
  -4   5   2  130.82    6.15
   4  -5  -2  176.76    7.14
   4   5  -2  216.60    6.20
  -4  -5   1   75.68    5.00
  -4  -5   1   72.90    4.86
  -4  -5   1   60.65    4.47
  -4   5   1   68.40    4.72
  -4   5   1   61.66    2.84
  -4   5   1   74.25    4.83
   4  -5  -1  102.02    5.18
   4   5  -1  124.38    5.41
  -4  -5   0 1113.85   17.89
  -4  -5   0  906.47   17.03
  -4   5   0 1067.75   18.32
  -4   5   0  831.72   11.97
  -4   5   0 1072.42   18.34
   4  -5   0 1465.59   17.43
   4   5   0 1650.53   21.02
  -4  -5  -1  815.14   15.97
  -4  -5  -1  705.46   14.14
  -4  -5  -1  594.86   14.31
  -4   5  -1  694.60   15.28
  -4   5  -1  527.13   11.03
  -4   5  -1  705.07   15.56
   4  -5   1  861.96   12.03
   4   5   1 1106.11   18.70
  -4  -5  -2   74.04    5.43
  -4  -5  -2   23.63    2.77
  -4  -5  -2   52.75    4.74
  -4   5  -2   80.29    5.62
  -4   5  -2    1.51    1.02
  -4   5  -2   81.49    5.71
   4  -5   2   74.58    3.17
   4   5   2  126.93    7.09
  -4  -5  -3   44.49    4.70
  -4  -5  -3   35.72    3.54
  -4  -5  -3   31.95    3.90
  -4   5  -3   32.59    4.25
  -4   5  -3   22.62    3.45
  -4   5  -3   40.02    4.42
   4   5   3   50.68    5.12
  -4  -5  -4  112.72    6.06
  -4  -5  -4  165.99    8.31
  -4  -5  -4  113.11    5.97
  -4  -5  -4  106.42    7.23
  -4   5  -4  122.47    7.68
  -4   5  -4   70.52    5.74
  -4   5  -4  120.68    7.78
   4   5   4  184.73    9.71
  -4  -5  -5   65.32    6.36
  -4  -5  -5   51.41    5.55
  -4   5  -5   80.22    6.94
  -4   5  -5   47.45    5.46
  -4   5  -5   71.84    6.47
   4   5   5  112.43    8.65
  -4  -5  -6   74.20    7.12
  -4  -5  -6   54.81    6.12
  -4   5  -6   53.09    5.97
  -4   5  -6   35.51    5.48
  -4   5  -6   52.17    5.94
   4   5   6   83.33    8.10
  -4  -5  -7   32.98    5.53
  -4  -5  -7   25.28    5.18
  -4   5  -7   35.48    5.77
  -4   5  -7   21.58    4.96
  -4   5  -7   42.25    6.31
   4   5   7   61.33    7.46
  -4  -5  -8   10.97    4.29
  -4  -5  -8    3.68    3.42
  -4   5  -8   11.31    4.29
  -4   5  -8    6.76    4.11
  -4   5  -8   17.08    5.10
   4   5   8   17.36    6.07
  -4  -5  -9   38.04    6.73
  -4  -5  -9   17.68    5.33
  -4   5  -9   28.20    6.00
  -4   5  -9   16.36    5.41
  -4   5  -9   38.93    6.92
   4   5   9   52.31    8.78
  -4  -5 -10   24.32    6.10
  -4  -5 -10   12.67    5.72
  -4   5 -10   23.83    6.14
  -4   5 -10   12.52    5.25
  -4   5 -10   28.45    6.87
   4   5  10   36.97    8.66
  -4  -5 -11   -0.14    3.74
  -4   5 -11    0.71    4.23
   4  -6 -12    2.30    4.39
   4  -6 -12   -1.53    4.21
   4   6 -12   -0.45    3.73
   4  -6 -11   19.59    5.79
   4  -6 -11   26.61    6.01
   4   6 -11   12.96    5.08
  -4  -6  10   37.03    6.03
  -4  -6  10   35.00    5.77
   4  -6 -10   27.87    5.73
   4  -6 -10   37.48    6.35
   4   6 -10   19.46    5.36
  -4  -6   9    0.36    2.95
  -4  -6   9    2.08    3.01
   4  -6  -9    0.89    3.09
   4   6  -9   -0.62    2.85
  -4  -6   8    8.50    3.55
  -4  -6   8   11.52    3.59
  -4   6   8   16.00    4.40
   4  -6  -8    7.66    3.49
   4   6  -8   11.64    3.96
  -4  -6   7    5.67    3.05
  -4  -6   7    4.29    2.44
  -4   6   7   10.67    3.67
  -4   6   7    4.02    2.21
  -4   6   7    5.50    2.20
   4  -6  -7    7.79    3.11
   4   6  -7   10.30    3.64
  -4  -6   6   15.19    3.44
  -4  -6   6   14.11    3.32
  -4   6   6   10.46    3.45
  -4   6   6    7.86    2.55
  -4   6   6    6.68    2.18
   4  -6  -6   20.06    3.83
   4  -6  -6   11.41    2.23
   4   6  -6   11.35    3.31
  -4  -6   5    1.00    1.70
  -4  -6   5    0.94    1.74
  -4   6   5    1.57    2.20
  -4   6   5    2.13    1.49
  -4   6   5   -0.87    1.17
   4  -6  -5    2.31    1.99
   4  -6  -5    0.00    1.03
   4   6  -5    0.35    1.84
  -4  -6   4   46.34    4.54
  -4  -6   4   48.54    4.66
  -4   6   4   68.96    5.66
  -4   6   4   43.14    4.04
  -4   6   4   45.20    3.85
   4  -6  -4   61.85    5.32
   4  -6  -4   28.61    1.89
   4   6  -4   69.58    5.54
   4   6  -4   58.50    2.29
  -4  -6   3   74.23    5.33
  -4  -6   3   70.33    5.20
  -4   6   3  127.01    6.97
  -4   6   3   75.08    5.10
  -4   6   3   82.85    5.17
   4  -6  -3   90.74    5.88
   4   6  -3  117.22    6.60
   4   6  -3  133.99    4.50
  -4  -6   2   34.50    3.88
  -4  -6   2   31.18    3.50
  -4  -6   2   27.45    3.53
  -4   6   2   40.65    4.27
  -4   6   2   26.24    3.23
  -4   6   2   27.73    1.38
  -4   6   2   24.67    3.23
   4  -6  -2   44.62    4.03
   4   6  -2   41.10    3.15
  -4  -6   1   49.29    4.28
  -4  -6   1   50.69    4.23
  -4  -6   1   41.51    4.00
  -4   6   1   53.24    4.34
  -4   6   1   40.62    2.22
  -4   6   1   45.81    4.15
   4  -6  -1   61.96    4.28
   4   6  -1   78.91    4.55
  -4  -6   0  187.29    7.85
  -4  -6   0  191.35    7.82
  -4  -6   0  158.02    7.44
  -4   6   0  195.63    8.27
  -4   6   0  156.60    5.18
  -4   6   0  205.75    8.41
   4  -6   0  229.48    7.28
   4   6   0  324.63    9.69
  -4  -6  -1  343.49   10.43
  -4  -6  -1  414.13   11.67
  -4  -6  -1  349.03   10.49
  -4  -6  -1  296.25   10.38
  -4   6  -1  381.06   11.38
  -4   6  -1  259.14    7.75
  -4   6  -1  350.86   11.39
   4  -6   1  384.30    8.40
   4   6   1  573.05   13.82
  -4  -6  -2  142.90    6.88
  -4  -6  -2  171.48    8.12
  -4  -6  -2  141.17    6.78
  -4  -6  -2  130.44    7.31
  -4   6  -2  144.72    7.71
  -4   6  -2   98.06    5.52
  -4   6  -2  130.74    7.29
   4  -6   2  144.97    4.58
   4   6   2  224.63    9.39
  -4  -6  -3   31.01    3.73
  -4  -6  -3   33.72    4.33
  -4  -6  -3   33.87    3.60
  -4  -6  -3   23.51    3.80
  -4   6  -3   26.13    3.95
  -4   6  -3   18.82    3.35
  -4   6  -3   33.44    4.51
   4   6   3   42.21    4.88
  -4  -6  -4   35.45    4.08
  -4  -6  -4   65.38    5.01
  -4  -6  -4   35.31    3.81
  -4  -6  -4   38.37    4.61
  -4   6  -4   45.20    5.04
  -4   6  -4   27.77    4.30
  -4   6  -4   50.07    5.29
   4   6   4   84.29    6.96
  -4  -6  -5  376.33   14.33
  -4  -6  -5  266.62   12.06
  -4   6  -5  359.42   13.76
  -4   6  -5  210.74   10.51
  -4   6  -5  352.36   13.63
   4   6   5  572.27   17.93
  -4  -6  -6   19.28    4.33
  -4  -6  -6   14.80    4.00
  -4   6  -6   25.90    4.93
  -4   6  -6   10.11    3.77
  -4   6  -6   22.19    4.78
   4   6   6   33.14    6.03
  -4  -6  -7   13.95    4.29
  -4  -6  -7   11.82    4.21
  -4   6  -7   16.78    4.42
  -4   6  -7    7.83    3.97
  -4   6  -7   14.99    4.41
   4   6   7   28.94    6.21
  -4  -6  -8   16.03    4.77
  -4  -6  -8    9.30    4.09
  -4   6  -8   10.61    4.35
  -4   6  -8    6.95    4.05
  -4   6  -8   11.51    4.73
   4   6   8   16.13    6.08
  -4  -6  -9   34.00    6.50
  -4  -6  -9   24.23    5.82
  -4   6  -9   30.97    6.29
  -4   6  -9   16.81    5.59
  -4   6  -9   30.38    6.58
   4   6   9   51.54    8.56
  -4  -6 -10   18.43    5.83
  -4  -6 -10   10.25    5.32
  -4   6 -10   15.82    5.36
  -4   6 -10    8.25    4.75
  -4   6 -10   13.55    5.85
   4   6  10   18.27    7.22
   4  -7 -12    0.87    4.30
   4  -7 -12    0.99    4.44
   4   7 -12   -2.11    3.39
   4  -7 -11    5.47    4.47
   4  -7 -11    8.12    4.71
   4   7 -11   -0.69    3.30
  -4  -7  10    3.53    4.05
  -4  -7  10    5.33    3.90
   4  -7 -10    4.13    4.07
   4  -7 -10    1.49    3.42
   4   7 -10    3.23    3.37
  -4  -7   9   26.78    5.20
  -4  -7   9   32.68    5.34
   4  -7  -9   20.96    4.98
   4  -7  -9   29.42    5.50
   4   7  -9   16.11    4.56
  -4  -7   8   46.44    5.85
  -4  -7   8   43.96    5.54
   4  -7  -8   40.31    6.04
   4  -7  -8   42.17    5.98
   4   7  -8   34.39    5.50
  -4  -7   7   15.27    3.89
  -4  -7   7   13.88    3.72
  -4   7   7    0.68    2.18
  -4   7   7    6.63    2.44
   4  -7  -7   14.29    3.87
   4   7  -7   17.58    4.29
  -4  -7   6    8.17    2.94
  -4  -7   6    8.91    3.03
  -4   7   6    8.20    3.32
  -4   7   6    2.66    1.86
  -4   7   6    1.42    1.50
   4  -7  -6    9.17    3.34
   4   7  -6   10.77    3.54
  -4  -7   5   27.15    4.05
  -4  -7   5   24.25    3.90
  -4   7   5   30.96    4.40
  -4   7   5   19.60    3.16
  -4   7   5   13.96    2.81
   4  -7  -5   27.98    4.21
   4   7  -5   33.39    4.60
  -4  -7   4    0.68    1.59
  -4  -7   4    2.95    2.01
  -4   7   4    2.05    2.21
  -4   7   4    2.86    1.75
  -4   7   4    3.32    1.70
   4  -7  -4    2.16    1.83
   4   7  -4    4.83    2.37
   4   7  -4    3.22    1.08
  -4  -7   3  289.61   10.51
  -4  -7   3  297.87   10.63
  -4   7   3  243.63    9.13
  -4   7   3  235.56    8.91
   4  -7  -3  336.88   11.02
   4   7  -3  374.95   11.93
   4   7  -3  410.92    8.23
  -4  -7   2  415.14   12.27
  -4  -7   2  414.20   12.18
  -4  -7   2  333.47   10.97
  -4   7   2  388.56   11.44
  -4   7   2  377.60   11.30
   4  -7  -2  492.39   12.55
   4   7  -2  630.77   11.55
  -4  -7   1   93.51    5.91
  -4  -7   1   97.05    5.92
  -4  -7   1   83.38    5.68
  -4   7   1   89.71    5.70
  -4   7   1   74.28    2.79
  -4   7   1   94.13    5.85
   4  -7  -1  115.62    5.88
   4   7  -1  146.56    6.33
  -4  -7   0   46.54    4.34
  -4  -7   0   56.85    4.36
  -4  -7   0   49.44    4.40
  -4  -7   0   38.23    3.98
  -4   7   0   40.09    4.12
  -4   7   0   35.30    2.61
  -4   7   0   44.72    4.30
   4  -7   0   59.92    4.05
   4   7   0   84.36    5.41
  -4  -7  -1   69.40    5.14
  -4  -7  -1   88.95    5.65
  -4  -7  -1   70.79    5.09
  -4  -7  -1   62.44    5.07
  -4   7  -1   77.08    5.39
  -4   7  -1   58.78    3.90
  -4   7  -1   86.00    5.93
   4  -7   1   77.61    4.15
   4   7   1  124.69    6.94
  -4  -7  -2   29.54    3.58
  -4  -7  -2   27.54    4.10
  -4  -7  -2   32.94    3.70
  -4  -7  -2   29.13    3.97
  -4   7  -2   38.21    4.26
  -4   7  -2   26.51    3.29
  -4   7  -2   33.41    4.16
   4  -7   2   33.16    2.64
   4   7   2   64.23    5.63
  -4  -7  -3   22.69    3.17
  -4  -7  -3   80.11    6.15
  -4  -7  -3   30.76    3.48
  -4  -7  -3   57.06    5.33
  -4   7  -3   71.45    5.83
  -4   7  -3   22.27    3.28
  -4   7  -3   74.91    6.09
   4   7   3  123.91    7.92
  -4  -7  -4   75.58    5.53
  -4  -7  -4  105.01    7.45
  -4  -7  -4   78.43    5.63
  -4  -7  -4   84.03    6.66
  -4   7  -4   96.35    7.20
  -4   7  -4   52.40    5.28
  -4   7  -4   93.14    7.07
   4   7   4  149.92    9.22
  -4  -7  -5  376.34   14.53
  -4  -7  -5  266.45   10.12
  -4  -7  -5  299.36   12.91
  -4   7  -5  355.26   13.87
  -4   7  -5  225.50   10.90
  -4   7  -5  373.50   14.29
   4   7   5  595.19   18.62
  -4  -7  -6   11.21    3.80
  -4  -7  -6    8.48    3.49
  -4   7  -6   10.98    3.73
  -4   7  -6    7.72    3.58
  -4   7  -6   10.17    3.77
   4   7   6   18.22    5.46
  -4  -7  -7   10.67    3.89
  -4  -7  -7   13.46    4.21
  -4   7  -7    4.94    3.33
  -4   7  -7    4.92    3.59
  -4   7  -7    4.89    3.37
   4   7   7   11.14    5.11
  -4  -7  -8    5.80    3.83
  -4  -7  -8    6.86    3.63
  -4   7  -8   -0.47    3.11
  -4   7  -8    3.79    3.76
  -4   7  -8    2.26    3.43
   4   7   8    9.51    5.69
  -4  -7  -9   14.28    5.22
  -4  -7  -9   12.19    4.90
  -4   7  -9    7.33    4.20
  -4   7  -9    0.82    3.59
  -4   7  -9   12.06    5.29
   4   7   9   16.08    6.65
  -4  -7 -10    3.43    4.21
  -4   7 -10    5.04    4.30
  -4   7 -10   -2.02    3.57
  -4   7 -10    1.79    4.64
   4   7  10   -1.04    6.31
   4   7  11   16.94    7.94
   4  -8 -12    2.33    4.42
   4  -8 -12    2.56    4.78
   4   8 -12    0.91    3.89
   4  -8 -11   16.30    5.50
   4  -8 -11   20.01    5.87
   4   8 -11   14.24    5.34
  -4  -8  10   11.69    4.69
  -4  -8  10   15.24    4.67
   4  -8 -10    9.68    4.73
   4  -8 -10   11.44    4.86
   4   8 -10   14.29    4.79
  -4  -8   9   19.84    4.70
  -4  -8   9   24.24    4.98
   4  -8  -9   11.93    4.64
   4  -8  -9   26.95    5.43
   4   8  -9   17.15    4.66
  -4  -8   8   76.22    7.12
  -4  -8   8   82.59    7.26
  -4   8   8   52.76    5.67
   4  -8  -8   73.90    7.63
   4  -8  -8   70.29    7.14
   4   8  -8   68.89    7.22
  -4  -8   7   90.07    7.25
  -4  -8   7   87.38    7.13
  -4   8   7    2.75    2.25
  -4   8   7    4.63    2.14
   4  -8  -7   89.18    7.71
   4  -8  -7   89.92    7.77
   4   8  -7  100.83    8.16
  -4  -8   6   20.65    3.97
  -4  -8   6   24.32    4.20
  -4   8   6   14.39    3.08
  -4   8   6   14.86    2.98
   4  -8  -6   24.55    4.24
   4  -8  -6   25.78    4.46
   4   8  -6   26.46    4.72
  -4  -8   5   18.68    3.66
  -4  -8   5   17.74    3.56
  -4   8   5   10.53    2.59
  -4   8   5   11.03    2.67
   4  -8  -5   11.54    3.37
   4  -8  -5   17.55    3.57
   4   8  -5   19.19    3.94
  -4  -8   4   11.19    2.91
  -4  -8   4   11.92    2.94
  -4   8   4    6.68    2.25
  -4   8   4    5.91    2.21
   4  -8  -4   15.35    3.36
   4  -8  -4   14.31    3.23
   4   8  -4   14.44    3.56
   4   8  -4   12.17    1.71
  -4  -8   3  462.01   13.63
  -4  -8   3  437.74   13.20
  -4   8   3  377.99   11.74
  -4   8   3  374.93   11.76
   4  -8  -3  507.00   13.94
   4  -8  -3  508.44   13.92
   4   8  -3  584.48   15.34
   4   8  -3  647.21   11.04
  -4  -8   2  243.25    9.73
  -4  -8   2  244.08    9.80
  -4  -8   2  209.31    9.08
  -4   8   2  204.42    8.78
  -4   8   2  186.87    8.38
   4  -8  -2  271.34    9.68
   4  -8  -2  255.69    9.47
   4   8  -2  344.28    9.05
  -4  -8   1   97.82    6.18
  -4  -8   1  108.28    6.57
  -4  -8   1   83.01    5.76
  -4   8   1  103.37    6.33
  -4   8   1   81.14    2.79
  -4   8   1  108.23    6.58
   4  -8  -1  106.22    6.01
   4  -8  -1  104.97    5.86
   4   8  -1  165.23    7.03
  -4  -8   0   12.64    2.64
  -4  -8   0   14.55    2.79
  -4  -8   0   14.05    2.98
  -4   8   0   18.60    3.27
  -4   8   0   10.71    1.74
  -4   8   0   11.66    2.81
   4  -8   0   12.51    2.24
   4   8   0   19.40    3.45
   4   8   0   22.37    3.53
  -4  -8  -1   57.76    4.90
  -4  -8  -1   69.51    5.25
  -4  -8  -1   65.12    5.39
  -4   8  -1   63.61    5.16
  -4   8  -1   38.66    3.35
  -4   8  -1   57.92    5.24
   4  -8   1   68.63    4.17
   4   8   1   96.11    6.41
  -4  -8  -2   51.71    4.76
  -4  -8  -2   67.35    5.46
  -4  -8  -2   52.06    4.68
  -4  -8  -2   45.64    4.77
  -4   8  -2   67.75    5.73
  -4   8  -2   40.39    3.82
  -4   8  -2   61.93    5.53
   4  -8   2   52.61    3.36
   4   8   2  105.11    7.13
  -4  -8  -3   47.89    4.76
  -4  -8  -3   60.05    5.54
  -4  -8  -3   51.90    4.72
  -4  -8  -3   42.86    4.83
  -4   8  -3   58.98    5.54
  -4   8  -3   13.03    2.81
  -4   8  -3   57.35    5.70
   4   8   3   89.16    7.10
  -4  -8  -4    0.54    1.13
  -4  -8  -4    5.64    2.68
  -4  -8  -4    2.89    2.04
  -4   8  -4    2.18    2.12
  -4   8  -4    2.26    2.35
  -4   8  -4    2.47    2.60
   4   8   4    8.12    3.49
  -4  -8  -5   13.27    3.07
  -4  -8  -5   18.43    4.02
  -4  -8  -5    9.85    2.86
  -4  -8  -5   17.93    4.19
  -4   8  -5   10.29    3.59
  -4   8  -5    6.59    3.08
  -4   8  -5   13.30    3.88
   4   8   5   19.20    5.28
  -4  -8  -6   70.67    7.12
  -4  -8  -6   51.09    6.00
  -4   8  -6   50.01    5.96
  -4   8  -6   31.50    5.32
  -4   8  -6   60.50    6.55
   4   8   6  100.37    8.87
  -4  -8  -7   58.00    6.91
  -4  -8  -7   41.36    6.25
  -4   8  -7   58.87    6.98
  -4   8  -7   29.53    5.60
  -4   8  -7   55.98    6.92
   4   8   7   95.64    9.64
  -4  -8  -8   -0.39    2.59
  -4   8  -8    8.78    3.76
  -4   8  -8    1.58    3.36
  -4   8  -8    5.53    3.81
   4   8   8   13.81    5.92
  -4  -8  -9    9.51    4.64
  -4   8  -9   16.44    5.29
  -4   8  -9    2.72    4.17
  -4   8  -9   14.17    5.45
   4   8   9   23.99    7.14
   4   8   9   19.50    6.88
  -4  -8 -10   21.79    6.67
  -4   8 -10   24.57    6.38
   4   8  10   45.85    9.36
   4   8  10   48.93    9.80
   4   8  11    8.57    6.82
   4  -9 -13   -2.39    5.03
   4  -9 -12    8.83    5.57
   4  -9 -12   12.76    5.45
   4   9 -12    5.02    5.00
   4  -9 -11   30.15    6.64
   4  -9 -11   27.07    6.20
   4   9 -11   16.34    5.74
   4  -9 -10   45.92    7.13
   4  -9 -10   42.09    7.00
   4   9 -10   32.66    6.59
  -4  -9   9   23.56    5.26
  -4  -9   9   26.38    5.15
   4  -9  -9   19.35    5.18
   4  -9  -9   19.90    5.29
   4   9  -9   15.29    4.74
  -4  -9   8  117.43    8.62
  -4  -9   8  117.70    8.55
  -4   9   8   -0.07    1.56
  -4   9   8    2.12    1.98
   4  -9  -8  123.94    9.46
   4  -9  -8  107.36    8.80
   4   9  -8   91.31    8.15
  -4  -9   7  120.70    8.34
  -4  -9   7  119.52    8.16
  -4   9   7   83.40    6.55
  -4   9   7   83.49    6.69
   4  -9  -7  113.09    8.63
   4  -9  -7  112.47    8.55
   4   9  -7  139.01    9.52
  -4  -9   6   39.08    5.12
  -4  -9   6   29.76    4.47
  -4   9   6   20.13    3.66
  -4   9   6   22.36    3.95
   4  -9  -6   35.32    5.19
   4  -9  -6   40.19    5.45
   4   9  -6   38.22    5.50
  -4  -9   5   50.89    5.30
  -4  -9   5   55.04    5.54
  -4   9   5   33.45    4.31
  -4   9   5   35.96    4.48
   4  -9  -5   64.84    6.21
   4  -9  -5   50.12    5.44
   4   9  -5   68.72    6.42
  -4  -9   4   96.52    6.85
  -4  -9   4   95.46    6.77
  -4   9   4   75.98    5.72
  -4   9   4   82.63    5.98
   4  -9  -4  100.74    7.12
   4  -9  -4   96.31    6.83
   4   9  -4  128.62    7.91
  -4  -9   3  238.23   10.20
  -4  -9   3  240.45   10.18
  -4   9   3  180.02    8.54
  -4   9   3  179.51    8.64
   4  -9  -3  256.83   10.30
   4  -9  -3  267.14   10.46
   4   9  -3  308.12   11.69
   4   9  -3  306.81    8.24
  -4  -9   2  488.62   14.24
  -4  -9   2  482.67   14.11
  -4  -9   2  442.88   13.50
  -4   9   2  427.03   13.02
  -4   9   2  435.39   13.22
   4  -9  -2  524.37   13.89
   4  -9  -2  515.68   13.72
   4   9  -2  768.81   14.10
  -4  -9   1  242.80    9.99
  -4  -9   1  247.49   10.12
  -4  -9   1  208.28    9.28
  -4   9   1  244.10    9.98
  -4   9   1  250.15   10.12
   4  -9  -1  265.64    9.54
   4  -9  -1  263.32    9.36
   4   9  -1  417.48   11.43
   4   9  -1  414.76   11.28
  -4  -9   0   67.01    5.47
  -4  -9   0   61.63    5.20
  -4  -9   0   59.36    5.16
  -4   9   0   91.65    5.71
  -4   9   0   57.43    3.35
  -4   9   0   73.17    5.80
   4  -9   0   73.70    4.91
   4   9   0  111.09    6.52
   4   9   0  120.41    6.90
  -4  -9  -1   82.82    5.96
  -4  -9  -1   76.16    5.84
  -4  -9  -1   77.06    5.96
  -4   9  -1  101.43    6.79
  -4   9  -1   72.79    4.41
  -4   9  -1   98.75    6.79
   4  -9   1   77.75    4.72
   4   9   1  166.63    8.38
   4   9   1  174.39    8.66
  -4  -9  -2  188.90    8.95
  -4  -9  -2  196.33    9.08
  -4  -9  -2  213.78   10.01
  -4   9  -2  224.31   10.21
  -4   9  -2  146.75    6.83
  -4   9  -2  220.68   10.22
   4  -9   2  197.52    6.53
   4   9   2  372.75   13.14
   4   9   2  366.80   12.87
  -4  -9  -3   10.32    2.80
  -4  -9  -3   12.78    3.01
  -4  -9  -3   14.14    3.49
  -4   9  -3   11.91    3.26
  -4   9  -3    7.55    2.72
  -4   9  -3   13.40    3.68
   4   9   3   19.51    4.30
   4   9   3   21.38    4.54
  -4  -9  -4    5.53    2.50
  -4  -9  -4    7.49    2.60
  -4  -9  -4    9.20    3.32
  -4   9  -4    8.94    3.12
  -4   9  -4    1.97    2.45
  -4   9  -4    9.95    3.66
   4   9   4   14.07    4.25
  -4  -9  -5    2.01    2.04
  -4  -9  -5    1.21    1.63
  -4  -9  -5   11.24    3.76
  -4   9  -5   16.93    4.25
  -4   9  -5    6.39    3.30
  -4   9  -5   15.41    4.25
   4   9   5   20.39    5.23
  -4  -9  -6   81.31    7.60
  -4   9  -6   88.12    7.94
  -4   9  -6   52.46    6.40
  -4   9  -6   87.16    7.97
   4   9   6  154.53   10.91
  -4  -9  -7   47.07    6.81
  -4   9  -7   53.84    7.11
  -4   9  -7   23.99    5.42
  -4   9  -7   54.93    6.86
   4   9   7   90.05    9.41
   4   9   7   93.19    9.69
  -4  -9  -8   16.05    4.96
  -4   9  -8   23.69    5.65
  -4   9  -8    9.29    4.45
  -4   9  -8   21.39    5.66
   4   9   8   31.46    7.55
   4   9   8   24.07    6.96
  -4  -9  -9    4.94    4.07
  -4   9  -9    1.05    3.68
  -4   9  -9    0.76    3.99
  -4   9  -9    3.60    4.59
   4   9   9    2.79    5.09
   4   9   9    4.90    5.98
   4   9  10   23.94    7.92
   4   9  11   36.06    9.52
   4 -10 -13    2.19    5.07
   4 -10 -12   25.96    6.82
   4 -10 -12   29.84    7.48
   4 -10 -11   35.98    7.06
   4 -10 -11   54.22    8.23
   4  10 -11   18.72    5.87
   4 -10 -10   62.74    8.19
   4 -10 -10   78.00    8.76
  -4 -10   9   23.46    5.16
  -4 -10   9   18.88    4.89
   4 -10  -9   28.64    5.97
   4 -10  -9   17.20    4.92
   4  10  -9   17.98    5.10
  -4 -10   8   30.65    5.30
  -4 -10   8   28.43    5.17
  -4  10   8   31.57    4.82
  -4  10   8   18.45    4.23
   4 -10  -8   25.72    5.39
   4 -10  -8   25.06    5.16
   4  10  -8   35.64    5.98
  -4 -10   7  170.18    9.94
  -4 -10   7  169.94    9.78
  -4  10   7  106.37    7.65
  -4  10   7  104.23    7.64
   4 -10  -7  153.94    9.98
   4 -10  -7  157.83   10.31
   4  10  -7  168.27   10.66
  -4 -10   6   50.18    5.77
  -4 -10   6   47.20    5.58
  -4  10   6   38.09    4.67
  -4  10   6   40.86    4.94
   4 -10  -6   49.78    6.10
   4 -10  -6   44.95    5.61
   4  10  -6   71.24    6.84
  -4 -10   5   45.37    5.30
  -4 -10   5   46.89    5.42
  -4  10   5   34.12    4.59
  -4  10   5   23.90    4.11
   4 -10  -5   50.66    5.76
   4 -10  -5   43.24    5.27
   4  10  -5   56.40    6.11
  -4 -10   4  257.37   11.13
  -4 -10   4  271.95   11.34
  -4  10   4  181.11    9.08
  -4  10   4  189.20    9.25
   4 -10  -4  280.60   11.66
   4 -10  -4  288.68   11.80
   4  10  -4  329.38   12.73
  -4 -10   3  277.26   11.32
  -4 -10   3  276.37   11.25
  -4  10   3  261.42   10.76
  -4  10   3  252.27   10.63
   4 -10  -3  307.12   11.64
   4 -10  -3  301.60   11.46
   4  10  -3  442.61   14.34
   4  10  -3  435.77   10.38
  -4 -10   2  142.33    8.11
  -4 -10   2  149.62    8.26
  -4 -10   2  144.94    8.09
  -4  10   2  147.13    8.17
  -4  10   2  157.76    8.50
   4 -10  -2  163.90    8.30
   4 -10  -2  159.84    8.12
   4  10  -2  260.68    8.87
  -4 -10   1   91.60    6.50
  -4 -10   1   90.38    6.60
  -4 -10   1   86.07    6.38
  -4  10   1   87.34    6.47
  -4  10   1   92.79    6.72
   4 -10  -1   96.95    6.32
   4 -10  -1   99.57    6.23
   4  10  -1  156.19    7.63
   4  10  -1  148.49    7.36
  -4 -10   0  119.30    7.36
  -4 -10   0  118.00    7.43
  -4 -10   0  124.61    7.53
  -4  10   0  141.03    7.66
  -4  10   0  115.76    7.40
   4 -10   0  128.18    6.81
   4 -10   0  125.52    6.51
   4  10   0  212.09    9.32
   4  10   0  208.86    9.05
  -4 -10  -1  352.81   12.50
  -4 -10  -1  346.86   12.41
  -4 -10  -1  357.22   12.74
  -4  10  -1  359.86   12.96
  -4  10  -1  388.07   13.47
   4 -10   1  356.25   10.06
   4  10   1  641.03   16.58
   4  10   1  681.95   16.97
  -4 -10  -2   85.43    6.44
  -4 -10  -2   91.80    6.69
  -4 -10  -2  101.17    7.14
  -4  10  -2  112.50    7.69
  -4  10  -2   65.37    4.99
  -4  10  -2  102.86    7.38
   4  10   2  182.03    9.78
   4  10   2  181.41    9.53
  -4 -10  -3    8.01    2.68
  -4 -10  -3    3.74    2.36
  -4 -10  -3    5.34    2.50
  -4  10  -3    7.83    3.10
  -4  10  -3    7.92    2.79
  -4  10  -3    9.67    3.31
   4  10   3   18.93    4.49
   4  10   3   18.63    4.42
  -4 -10  -4    7.43    2.90
  -4 -10  -4    5.40    2.53
  -4 -10  -4    9.46    3.32
  -4  10  -4   14.99    4.00
  -4  10  -4    3.65    2.48
  -4  10  -4   10.95    3.62
   4  10   4   30.91    5.68
   4  10   4   30.16    5.50
  -4 -10  -5   65.56    6.11
  -4 -10  -5   60.32    5.85
  -4 -10  -5   87.50    7.55
  -4  10  -5  119.92    8.71
  -4  10  -5   58.06    6.21
  -4  10  -5  120.14    8.76
   4  10   5  201.67   11.81
   4  10   5  199.82   11.84
  -4 -10  -6   17.17    4.55
  -4  10  -6   22.91    4.89
  -4  10  -6   12.44    4.22
  -4  10  -6   22.17    4.92
   4  10   6   83.85    6.35
   4  10   6   44.16    7.19
  -4 -10  -7   25.58    5.59
  -4  10  -7   33.66    5.98
  -4  10  -7   15.34    4.75
  -4  10  -7   32.13    5.94
   4  10   7   47.59    7.67
   4  10   7   47.15    7.88
  -4 -10  -8   23.49    5.76
  -4  10  -8   21.04    5.48
  -4  10  -8   11.66    5.03
  -4  10  -8   23.97    5.94
   4  10   8   30.59    7.45
   4  10   8   47.84    8.85
  -4 -10  -9   27.02    6.50
  -4  10  -9   38.46    7.06
  -4  10  -9   16.57    6.02
  -4  10  -9   48.39    8.00
   4  10   9   70.80   10.50
   4  10   9   70.21   10.37
   4  10  10   19.19    7.74
   4 -11 -12   37.77    7.83
   4 -11 -12   35.87    7.91
   4 -11 -11   16.72    6.06
   4 -11 -11   21.45    6.41
   4  11 -11    8.10    5.10
   4 -11 -10   24.58    6.16
   4 -11 -10   27.66    6.41
   4  11 -10   12.52    4.72
  -4 -11   9   53.99    6.98
  -4 -11   9   64.57    7.40
   4 -11  -9   52.80    7.47
   4 -11  -9   61.92    7.60
  -4 -11   8   22.40    4.98
  -4 -11   8   20.05    4.66
  -4  11   8   10.90    3.51
  -4  11   8    9.19    3.55
   4 -11  -8   15.20    4.56
   4 -11  -8   18.06    4.80
   4  11  -8   13.68    4.82
  -4 -11   7   44.27    5.92
  -4 -11   7   39.12    5.64
  -4  11   7   29.64    5.03
  -4  11   7   25.30    4.63
   4 -11  -7   34.66    5.56
   4 -11  -7   40.88    5.99
   4  11  -7   47.67    6.63
  -4 -11   6   53.85    6.11
  -4 -11   6   51.79    5.70
  -4  11   6   31.21    4.76
  -4  11   6   28.32    4.64
   4 -11  -6   44.26    6.06
   4 -11  -6   49.40    6.03
   4  11  -6   57.49    6.49
  -4 -11   5  103.76    7.63
  -4 -11   5   92.59    7.30
  -4  11   5   70.81    6.04
  -4  11   5   67.00    6.14
   4 -11  -5  105.72    8.04
   4 -11  -5   98.77    7.77
   4  11  -5  132.80    8.90
  -4 -11   4  215.04   10.51
  -4 -11   4  215.81   10.45
  -4  11   4  169.29    9.07
  -4  11   4  160.55    8.89
   4 -11  -4  217.51   10.66
   4 -11  -4  214.33   10.57
   4  11  -4  310.37   12.75
  -4 -11   3  102.27    7.25
  -4 -11   3  100.38    7.29
  -4  11   3   71.27    6.12
  -4  11   3   76.80    6.47
   4 -11  -3   91.13    6.93
   4 -11  -3   94.62    7.00
   4  11  -3  135.27    8.41
   4  11  -3  122.97    6.06
  -4 -11   2   63.52    5.78
  -4 -11   2   64.78    5.78
  -4 -11   2   67.62    5.95
  -4  11   2   57.80    5.52
  -4  11   2   55.36    5.46
   4 -11  -2   71.49    6.04
   4 -11  -2   75.19    6.09
   4  11  -2   97.21    6.10
   4  11  -2   96.87    5.91
  -4 -11   1  336.39   12.63
  -4 -11   1  310.28   12.13
  -4 -11   1  334.47   12.45
  -4  11   1  327.82   12.42
  -4  11   1  333.00   12.61
   4 -11  -1  345.49   11.68
   4 -11  -1  329.81   11.32
   4  11  -1  549.31   14.17
   4  11  -1  558.80   14.21
  -4 -11   0  153.12    8.60
  -4 -11   0  136.82    8.20
  -4 -11   0  167.75    8.94
  -4  11   0  168.88    9.00
  -4  11   0  165.96    9.10
   4 -11   0  169.78    7.98
   4 -11   0  141.74    7.22
   4  11   0  278.60   10.79
   4  11   0  287.32   10.99
  -4 -11  -1   81.72    6.52
  -4 -11  -1   88.96    6.84
  -4 -11  -1   90.49    6.78
  -4  11  -1  113.53    7.71
  -4  11  -1  102.12    7.38
   4 -11   1   89.64    5.76
   4 -11   1   85.58    5.37
   4  11   1  166.97    9.14
   4  11   1  180.24    9.45
  -4 -11  -2  230.76   10.72
  -4 -11  -2  213.56   10.29
  -4 -11  -2  277.17   11.90
  -4  11  -2  291.73   12.33
  -4  11  -2  304.82   12.62
   4  11   2  502.68   16.04
   4  11   2  499.54   15.91
  -4 -11  -3    0.61    1.92
  -4 -11  -3    2.02    2.17
  -4 -11  -3    2.40    2.36
  -4  11  -3    0.35    1.91
  -4  11  -3    0.85    2.31
  -4  11  -3    2.24    2.71
[truncated: 377,646 more chars]
