# Supplementary material for: A Highly Selective Turn-On Fluorescent Probe for the Detection of Zinc
Source: Molecules. 2021 Jun 23;26(13):3825. doi: 10.3390/molecules26133825 (PMC8270291; doi:10.3390/molecules26133825)
Supplement: Supplementary file 1 [file molecules-26-03825-s001.zip › Crystal/L-Cu.cif]

data_L-Cu
_audit_creation_date               2021-03-02
_audit_creation_method
;
Olex2 1.2
(compiled 2018.05.29 svn.r3508 for OlexSys, GUI svn.r5506)
;
_shelx_SHELXL_version_number       '2014/7'
_audit_contact_author_address      ?
_audit_contact_author_email        ?
_audit_contact_author_name         ''
_audit_contact_author_phone        ?
_publ_contact_author_id_orcid      ?
_publ_section_references
;
Dolomanov, O.V., Bourhis, L.J., Gildea, R.J, Howard, J.A.K. & Puschmann, H.
 (2009), J. Appl. Cryst. 42, 339-341.

Sheldrick, G.M. (2008). Acta Cryst. A64, 112-122.
;
_chemical_name_common              ?
_chemical_name_systematic          ?
_chemical_formula_moiety           'C19 H24 Cu N2 O3, H2 O'
_chemical_formula_sum              'C19 H24 Cu N3 O3'
_chemical_formula_weight           405.95
_chemical_absolute_configuration   unk
_chemical_melting_point            ?
loop_
  _atom_type_symbol
  _atom_type_description
  _atom_type_scat_dispersion_real
  _atom_type_scat_dispersion_imag
  _atom_type_scat_source
 'C' 'C' 0.0033 0.0016 'International Tables Vol C Tables 4.2.6.8 and 6.1.1.4'
 'H' 'H' 0.0000 0.0000 'International Tables Vol C Tables 4.2.6.8 and 6.1.1.4'
 'N' 'N' 0.0061 0.0033 'International Tables Vol C Tables 4.2.6.8 and 6.1.1.4'
 'O' 'O' 0.0106 0.0060 'International Tables Vol C Tables 4.2.6.8 and 6.1.1.4'
 'Cu' 'Cu' 0.3201 1.2651 'International Tables Vol C Tables 4.2.6.8 and 6.1.1.4'

_shelx_space_group_comment
;
The symmetry employed for this shelxl refinement is uniquely defined
by the following loop, which should always be used as a source of
symmetry information in preference to the above space-group names.
They are only intended as comments.
;
_space_group_crystal_system        'orthorhombic'
_space_group_IT_number             19
_space_group_name_H-M_alt          'P 21 21 21'
_space_group_name_Hall             'P 2ac 2ab'
loop_
  _space_group_symop_operation_xyz
 'x, y, z'
 'x+1/2, -y+1/2, -z'
 '-x, y+1/2, -z+1/2'
 '-x+1/2, -y, z+1/2'

_cell_length_a                     7.6261(8)
_cell_length_b                     12.8842(15)
_cell_length_c                     19.144(2)
_cell_angle_alpha                  90
_cell_angle_beta                   90
_cell_angle_gamma                  90
_cell_volume                       1881.1(4)
_cell_formula_units_Z              4
_cell_measurement_reflns_used      2937
_cell_measurement_temperature      302(2)
_cell_measurement_theta_max        25.42
_cell_measurement_theta_min        3.10
_shelx_estimated_absorpt_T_max     0.815
_shelx_estimated_absorpt_T_min     0.772
_exptl_absorpt_coefficient_mu      1.184
_exptl_absorpt_correction_T_max    0.7457
_exptl_absorpt_correction_T_min    0.4891
_exptl_absorpt_correction_type     multi-scan 
_exptl_absorpt_process_details
;
SADABS-2016/2 (Bruker,2016/2) was used for absorption correction.
wR2(int) was 0.1002 before and 0.0581 after correction.
The Ratio of minimum to maximum transmission is 0.6559.
The \l/2 correction factor is Not present.
;
_exptl_absorpt_special_details     ?
_exptl_crystal_colour              Brown
_exptl_crystal_density_diffrn      1.433
_exptl_crystal_density_meas       'not measured' 
_exptl_crystal_density_method      ?
_exptl_crystal_description         Block
_exptl_crystal_F_000               848
_exptl_crystal_size_max            0.23
_exptl_crystal_size_mid            0.2
_exptl_crystal_size_min            0.18
_exptl_transmission_factor_max     ?
_exptl_transmission_factor_min     ?
_diffrn_reflns_av_R_equivalents    0.0351
_diffrn_reflns_av_unetI/netI       0.0677
_diffrn_reflns_Laue_measured_fraction_full  0.997
_diffrn_reflns_Laue_measured_fraction_max  0.996
_diffrn_reflns_limit_h_max         10
_diffrn_reflns_limit_h_min         -10
_diffrn_reflns_limit_k_max         17
_diffrn_reflns_limit_k_min         -10
_diffrn_reflns_limit_l_max         25
_diffrn_reflns_limit_l_min         -23
_diffrn_reflns_number              9018
_diffrn_reflns_point_group_measured_fraction_full  0.994
_diffrn_reflns_point_group_measured_fraction_max  0.986
_diffrn_reflns_theta_full          25.242
_diffrn_reflns_theta_max           28.348
_diffrn_reflns_theta_min           2.875
_diffrn_ambient_temperature        301.72
_diffrn_detector_area_resol_mean   ?
_diffrn_measured_fraction_theta_full  0.997
_diffrn_measured_fraction_theta_max  0.996
_diffrn_measurement_device_type    'Bruker APEX-II CCD'
_diffrn_measurement_method         '\f and \w scans'
_diffrn_radiation_type             MoK\a
_diffrn_radiation_wavelength       0.71073
_diffrn_source                     ?
_diffrn_standards_number           0
_reflns_Friedel_coverage           0.737
_reflns_Friedel_fraction_full      0.989
_reflns_Friedel_fraction_max       0.974
_reflns_number_gt                  3547
_reflns_number_total               4634
_reflns_special_details
;
 Reflections were merged by SHELXL according to the crystal
 class for the calculation of statistics and refinement.
 
 _reflns_Friedel_fraction is defined as the number of unique
 Friedel pairs measured divided by the number that would be
 possible theoretically, ignoring centric projections and
 systematic absences.
;
_reflns_threshold_expression       'I > 2\s(I)'
_computing_cell_refinement         'SAINT V8.38A (?, 2016)'
_computing_data_collection         ?
_computing_data_reduction          'SAINT V8.38A (?, 2016)'
_computing_molecular_graphics      'Olex2 (Dolomanov et al., 2009)'
_computing_publication_material    'Olex2 (Dolomanov et al., 2009)'
_computing_structure_refinement    'XL (Sheldrick, 2008)'
_computing_structure_solution      ?
_refine_diff_density_max           0.338
_refine_diff_density_min           -0.387
_refine_diff_density_rms           0.058
_refine_ls_abs_structure_details
;
 Flack x determined using 1222 quotients [(I+)-(I-)]/[(I+)+(I-)]
 (Parsons, Flack and Wagner, Acta Cryst. B69 (2013) 249-259).
;
_refine_ls_abs_structure_Flack     -0.003(12)
_refine_ls_extinction_coef         .
_refine_ls_extinction_method       none
_refine_ls_goodness_of_fit_ref     1.029
_refine_ls_hydrogen_treatment      constr
_refine_ls_matrix_type             full
_refine_ls_number_parameters       241
_refine_ls_number_reflns           4634
_refine_ls_number_restraints       0
_refine_ls_R_factor_all            0.0657
_refine_ls_R_factor_gt             0.0382
_refine_ls_restrained_S_all        1.029
_refine_ls_shift/su_max            0.000
_refine_ls_shift/su_mean           0.000
_refine_ls_structure_factor_coef   Fsqd
_refine_ls_weighting_details      
 'w=1/[\s^2^(Fo^2^)+(0.0100P)^2^+0.2947P] where P=(Fo^2^+2Fc^2^)/3'
_refine_ls_weighting_scheme        calc
_refine_ls_wR_factor_gt            0.0668
_refine_ls_wR_factor_ref           0.0761
_refine_special_details            ?
_olex2_refinement_description
;
1. Fixed Uiso
 At 1.2 times of:
  All C(H) groups, All C(H,H) groups
 At 1.5 times of:
  All C(H,H,H) groups, All O(H,H) groups
2.a Free rotating group:
 O1W(H1WA,H1WB)
2.b Ternary CH refined with riding coordinates:
 C9(H9), C14(H14)
2.c Secondary CH2 refined with riding coordinates:
 C10(H10A,H10B), C11(H11A,H11B), C12(H12A,H12B), C13(H13A,H13B)
2.d Aromatic/amide H refined with riding coordinates:
 C3(H3), C4(H4), C5(H5), C8(H8), C16(H16)
2.e Idealised Me refined as rotating group:
 C7(H7A,H7B,H7C), C18(H18A,H18B,H18C), C19(H19A,H19B,H19C)
;
_atom_sites_solution_hydrogens     mixed
_atom_sites_solution_primary       ?
_atom_sites_solution_secondary     ?
loop_
  _atom_site_label
  _atom_site_type_symbol
  _atom_site_fract_x
  _atom_site_fract_y
  _atom_site_fract_z
  _atom_site_U_iso_or_equiv
  _atom_site_adp_type
  _atom_site_occupancy
  _atom_site_site_symmetry_order
  _atom_site_calc_flag
  _atom_site_refinement_flags_posn
  _atom_site_refinement_flags_adp
  _atom_site_refinement_flags_occupancy
  _atom_site_disorder_assembly
  _atom_site_disorder_group
 C1 C 0.7136(5) 0.5174(3) 0.5077(2) 0.0315(9) Uani 1 1 d . . . . .
 C2 C 0.7400(5) 0.5009(3) 0.5800(2) 0.0348(9) Uani 1 1 d . . . . .
 C3 C 0.8015(6) 0.5820(3) 0.6230(2) 0.0447(11) Uani 1 1 d . . . . .
 H3 H 0.8169 0.5703 0.6705 0.054 Uiso 1 1 calc R . . . .
 C4 C 0.8388(6) 0.6768(3) 0.5958(2) 0.0528(12) Uani 1 1 d . . . . .
 H4 H 0.8794 0.7298 0.6245 0.063 Uiso 1 1 calc R . . . .
 C5 C 0.8158(5) 0.6943(3) 0.5245(2) 0.0474(10) Uani 1 1 d . . . . .
 H5 H 0.8430 0.7589 0.5057 0.057 Uiso 1 1 calc R . . . .
 C6 C 0.7538(5) 0.6178(3) 0.4821(2) 0.0388(9) Uani 1 1 d . . . . .
 C7 C 0.7996(8) 0.7167(3) 0.3782(2) 0.0687(16) Uani 1 1 d . . . . .
 H7A H 0.7408 0.7782 0.3942 0.103 Uiso 1 1 calc GR . . . .
 H7B H 0.7854 0.7103 0.3286 0.103 Uiso 1 1 calc GR . . . .
 H7C H 0.9221 0.7213 0.3893 0.103 Uiso 1 1 calc GR . . . .
 C8 C 0.6972(5) 0.4042(3) 0.6126(2) 0.0370(10) Uani 1 1 d . . . . .
 H8 H 0.7064 0.4006 0.6609 0.044 Uiso 1 1 calc R . . . .
 C9 C 0.5899(5) 0.2272(3) 0.6159(2) 0.0372(10) Uani 1 1 d . . . . .
 H9 H 0.4626 0.2236 0.6094 0.045 Uiso 1 1 calc R . . . .
 C10 C 0.6202(7) 0.2217(3) 0.6944(2) 0.0486(12) Uani 1 1 d . . . . .
 H10A H 0.5672 0.2816 0.7168 0.058 Uiso 1 1 calc R . . . .
 H10B H 0.7451 0.2232 0.7040 0.058 Uiso 1 1 calc R . . . .
 C11 C 0.5405(7) 0.1223(4) 0.7244(2) 0.0606(14) Uani 1 1 d . . . . .
 H11A H 0.5733 0.1157 0.7732 0.073 Uiso 1 1 calc R . . . .
 H11B H 0.4137 0.1264 0.7219 0.073 Uiso 1 1 calc R . . . .
 C12 C 0.6025(7) 0.0284(4) 0.6850(2) 0.0580(14) Uani 1 1 d . . . . .
 H12A H 0.5416 -0.0324 0.7023 0.070 Uiso 1 1 calc R . . . .
 H12B H 0.7268 0.0187 0.6934 0.070 Uiso 1 1 calc R . . . .
 C13 C 0.5714(6) 0.0378(3) 0.6070(2) 0.0505(12) Uani 1 1 d . . . . .
 H13A H 0.4466 0.0435 0.5980 0.061 Uiso 1 1 calc R . . . .
 H13B H 0.6142 -0.0241 0.5837 0.061 Uiso 1 1 calc R . . . .
 C14 C 0.6656(6) 0.1333(3) 0.5778(2) 0.0388(11) Uani 1 1 d . . . . .
 H14 H 0.7904 0.1278 0.5895 0.047 Uiso 1 1 calc R . . . .
 C15 C 0.6925(5) 0.0867(3) 0.4539(2) 0.0385(10) Uani 1 1 d . . . . .
 C16 C 0.6745(6) 0.1082(3) 0.3817(2) 0.0462(12) Uani 1 1 d . . . . .
 H16 H 0.6979 0.0531 0.3518 0.055 Uiso 1 1 calc R . . . .
 C17 C 0.6277(6) 0.1982(4) 0.3506(2) 0.0387(9) Uani 1 1 d . . . . .
 C18 C 0.6126(6) 0.2036(4) 0.2722(2) 0.0537(12) Uani 1 1 d . . . . .
 H18A H 0.5365 0.2599 0.2595 0.081 Uiso 1 1 calc GR . . . .
 H18B H 0.5651 0.1396 0.2549 0.081 Uiso 1 1 calc GR . . . .
 H18C H 0.7266 0.2148 0.2523 0.081 Uiso 1 1 calc GR . . . .
 C19 C 0.7647(6) -0.0193(3) 0.4705(3) 0.0521(12) Uani 1 1 d . . . . .
 H19A H 0.8286 -0.0165 0.5137 0.078 Uiso 1 1 calc GR . . . .
 H19B H 0.8416 -0.0412 0.4337 0.078 Uiso 1 1 calc GR . . . .
 H19C H 0.6698 -0.0679 0.4749 0.078 Uiso 1 1 calc GR . . . .
 Cu1 Cu 0.63411(6) 0.30279(4) 0.48107(3) 0.03286(13) Uani 1 1 d . . . . .
 N1 N 0.6470(5) 0.3215(2) 0.58025(16) 0.0347(8) Uani 1 1 d . . . . .
 N2 N 0.6498(4) 0.1543(2) 0.50202(16) 0.0349(8) Uani 1 1 d . . . . .
 O1 O 0.6554(4) 0.44825(19) 0.46395(12) 0.0372(7) Uani 1 1 d . . . . .
 O1W O 0.5953(6) 0.4817(3) 0.30752(17) 0.0712(11) Uani 1 1 d . . . . .
 H1WA H 0.6007 0.4201 0.3231 0.107 Uiso 1 1 d G . . . .
 H1WB H 0.6207 0.5197 0.3424 0.107 Uiso 1 1 d G . . . .
 O2 O 0.7269(5) 0.6293(2) 0.41136(15) 0.0521(8) Uani 1 1 d . . . . .
 O3 O 0.6004(4) 0.2849(2) 0.38282(14) 0.0398(7) Uani 1 1 d . . . . .

loop_
  _atom_site_aniso_label
  _atom_site_aniso_U_11
  _atom_site_aniso_U_22
  _atom_site_aniso_U_33
  _atom_site_aniso_U_23
  _atom_site_aniso_U_13
  _atom_site_aniso_U_12
 C1 0.0337(19) 0.0279(19) 0.033(2) -0.0046(17) 0.0025(17) 0.0030(16)
 C2 0.040(2) 0.031(2) 0.033(2) -0.0051(18) -0.0006(19) 0.0047(19)
 C3 0.060(3) 0.041(3) 0.033(2) -0.0098(19) -0.001(2) -0.002(2)
 C4 0.074(3) 0.037(3) 0.048(3) -0.013(2) -0.004(3) -0.004(3)
 C5 0.067(3) 0.0267(18) 0.048(2) -0.006(2) -0.001(2) 0.000(2)
 C6 0.050(2) 0.031(2) 0.035(2) -0.003(2) 0.005(2) 0.0085(18)
 C7 0.114(5) 0.040(3) 0.051(3) 0.013(2) 0.005(3) -0.004(3)
 C8 0.043(2) 0.039(2) 0.029(2) -0.0011(18) -0.0012(18) 0.003(2)
 C9 0.033(2) 0.041(3) 0.037(2) 0.0044(19) -0.0011(18) -0.0073(19)
 C10 0.057(3) 0.051(3) 0.038(2) 0.0089(19) -0.007(2) -0.012(3)
 C11 0.071(3) 0.068(4) 0.043(3) 0.020(3) -0.001(3) -0.023(3)
 C12 0.057(3) 0.052(3) 0.064(3) 0.029(2) -0.010(3) -0.011(3)
 C13 0.052(3) 0.039(3) 0.060(3) 0.011(2) -0.002(2) -0.010(2)
 C14 0.030(2) 0.039(2) 0.047(3) 0.012(2) -0.004(2) -0.003(2)
 C15 0.033(2) 0.025(2) 0.057(3) -0.0030(19) 0.002(2) -0.0037(18)
 C16 0.054(3) 0.040(3) 0.044(3) -0.011(2) 0.006(2) -0.005(2)
 C17 0.035(2) 0.042(2) 0.039(2) -0.010(2) 0.000(2) -0.007(3)
 C18 0.062(3) 0.058(3) 0.041(2) -0.011(2) 0.000(2) -0.005(3)
 C19 0.052(3) 0.029(2) 0.076(4) -0.005(2) 0.006(3) 0.005(2)
 Cu1 0.0363(2) 0.0295(2) 0.0328(2) -0.0022(2) 0.0008(2) 0.0018(3)
 N1 0.0349(18) 0.035(2) 0.0341(17) 0.0027(15) 0.0033(16) -0.0039(19)
 N2 0.0351(17) 0.0316(16) 0.038(2) 0.0009(13) 0.0007(16) -0.0028(16)
 O1 0.0524(17) 0.0305(14) 0.0288(15) -0.0017(11) -0.0021(14) 0.0001(14)
 O1W 0.099(3) 0.063(2) 0.052(2) 0.0025(18) -0.020(2) 0.009(3)
 O2 0.089(2) 0.0313(16) 0.0359(17) 0.0050(13) -0.0046(17) -0.0008(17)
 O3 0.0504(18) 0.0352(17) 0.0339(15) -0.0033(13) -0.0016(14) 0.0056(16)

_geom_special_details
;
 All esds (except the esd in the dihedral angle between two l.s. planes)
 are estimated using the full covariance matrix.  The cell esds are taken
 into account individually in the estimation of esds in distances, angles
 and torsion angles; correlations between esds in cell parameters are only
 used when they are defined by crystal symmetry.  An approximate (isotropic)
 treatment of cell esds is used for estimating esds involving l.s. planes.
;
loop_
  _geom_bond_atom_site_label_1
  _geom_bond_atom_site_label_2
  _geom_bond_distance
  _geom_bond_site_symmetry_2
  _geom_bond_publ_flag
 C1 C2 1.415(5) . ?
 C1 C6 1.417(5) . ?
 C1 O1 1.302(4) . ?
 C2 C3 1.409(5) . ?
 C2 C8 1.431(5) . ?
 C3 H3 0.9300 . ?
 C3 C4 1.359(6) . ?
 C4 H4 0.9300 . ?
 C4 C5 1.394(5) . ?
 C5 H5 0.9300 . ?
 C5 C6 1.361(5) . ?
 C6 O2 1.378(5) . ?
 C7 H7A 0.9600 . ?
 C7 H7B 0.9600 . ?
 C7 H7C 0.9600 . ?
 C7 O2 1.407(5) . ?
 C8 H8 0.9300 . ?
 C8 N1 1.290(5) . ?
 C9 H9 0.9800 . ?
 C9 C10 1.522(5) . ?
 C9 C14 1.527(6) . ?
 C9 N1 1.460(5) . ?
 C10 H10A 0.9700 . ?
 C10 H10B 0.9700 . ?
 C10 C11 1.530(6) . ?
 C11 H11A 0.9700 . ?
 C11 H11B 0.9700 . ?
 C11 C12 1.503(7) . ?
 C12 H12A 0.9700 . ?
 C12 H12B 0.9700 . ?
 C12 C13 1.516(6) . ?
 C13 H13A 0.9700 . ?
 C13 H13B 0.9700 . ?
 C13 C14 1.530(5) . ?
 C14 H14 0.9800 . ?
 C14 N2 1.480(5) . ?
 C15 C16 1.415(6) . ?
 C15 C19 1.506(5) . ?
 C15 N2 1.309(5) . ?
 C16 H16 0.9300 . ?
 C16 C17 1.352(6) . ?
 C17 C18 1.506(5) . ?
 C17 O3 1.292(5) . ?
 C18 H18A 0.9600 . ?
 C18 H18B 0.9600 . ?
 C18 H18C 0.9600 . ?
 C19 H19A 0.9600 . ?
 C19 H19B 0.9600 . ?
 C19 H19C 0.9600 . ?
 Cu1 N1 1.916(3) . ?
 Cu1 N2 1.959(3) . ?
 Cu1 O1 1.909(3) . ?
 Cu1 O3 1.913(3) . ?
 O1W H1WA 0.8498 . ?
 O1W H1WB 0.8498 . ?

loop_
  _geom_angle_atom_site_label_1
  _geom_angle_atom_site_label_2
  _geom_angle_atom_site_label_3
  _geom_angle
  _geom_angle_site_symmetry_1
  _geom_angle_site_symmetry_3
  _geom_angle_publ_flag
 C2 C1 C6 116.4(4) . . ?
 O1 C1 C2 125.2(3) . . ?
 O1 C1 C6 118.4(4) . . ?
 C1 C2 C8 121.6(4) . . ?
 C3 C2 C1 120.4(4) . . ?
 C3 C2 C8 117.9(4) . . ?
 C2 C3 H3 119.6 . . ?
 C4 C3 C2 120.9(4) . . ?
 C4 C3 H3 119.6 . . ?
 C3 C4 H4 120.2 . . ?
 C3 C4 C5 119.6(4) . . ?
 C5 C4 H4 120.2 . . ?
 C4 C5 H5 119.7 . . ?
 C6 C5 C4 120.7(4) . . ?
 C6 C5 H5 119.7 . . ?
 C5 C6 C1 122.0(4) . . ?
 C5 C6 O2 124.1(4) . . ?
 O2 C6 C1 114.0(3) . . ?
 H7A C7 H7B 109.5 . . ?
 H7A C7 H7C 109.5 . . ?
 H7B C7 H7C 109.5 . . ?
 O2 C7 H7A 109.5 . . ?
 O2 C7 H7B 109.5 . . ?
 O2 C7 H7C 109.5 . . ?
 C2 C8 H8 117.3 . . ?
 N1 C8 C2 125.4(4) . . ?
 N1 C8 H8 117.3 . . ?
 C10 C9 H9 106.0 . . ?
 C10 C9 C14 112.2(4) . . ?
 C14 C9 H9 106.0 . . ?
 N1 C9 H9 106.0 . . ?
 N1 C9 C10 117.1(3) . . ?
 N1 C9 C14 108.8(3) . . ?
 C9 C10 H10A 109.6 . . ?
 C9 C10 H10B 109.6 . . ?
 C9 C10 C11 110.4(4) . . ?
 H10A C10 H10B 108.1 . . ?
 C11 C10 H10A 109.6 . . ?
 C11 C10 H10B 109.6 . . ?
 C10 C11 H11A 109.4 . . ?
 C10 C11 H11B 109.4 . . ?
 H11A C11 H11B 108.0 . . ?
 C12 C11 C10 111.1(4) . . ?
 C12 C11 H11A 109.4 . . ?
 C12 C11 H11B 109.4 . . ?
 C11 C12 H12A 109.1 . . ?
 C11 C12 H12B 109.1 . . ?
 C11 C12 C13 112.5(4) . . ?
 H12A C12 H12B 107.8 . . ?
 C13 C12 H12A 109.1 . . ?
 C13 C12 H12B 109.1 . . ?
 C12 C13 H13A 109.5 . . ?
 C12 C13 H13B 109.5 . . ?
 C12 C13 C14 110.5(4) . . ?
 H13A C13 H13B 108.1 . . ?
 C14 C13 H13A 109.5 . . ?
 C14 C13 H13B 109.5 . . ?
 C9 C14 C13 106.5(4) . . ?
 C9 C14 H14 108.4 . . ?
 C13 C14 H14 108.4 . . ?
 N2 C14 C9 107.0(3) . . ?
 N2 C14 C13 117.8(4) . . ?
 N2 C14 H14 108.4 . . ?
 C16 C15 C19 114.8(4) . . ?
 N2 C15 C16 122.2(4) . . ?
 N2 C15 C19 123.0(4) . . ?
 C15 C16 H16 115.7 . . ?
 C17 C16 C15 128.7(4) . . ?
 C17 C16 H16 115.7 . . ?
 C16 C17 C18 120.0(4) . . ?
 O3 C17 C16 124.9(4) . . ?
 O3 C17 C18 115.0(4) . . ?
 C17 C18 H18A 109.5 . . ?
 C17 C18 H18B 109.5 . . ?
 C17 C18 H18C 109.5 . . ?
 H18A C18 H18B 109.5 . . ?
 H18A C18 H18C 109.5 . . ?
 H18B C18 H18C 109.5 . . ?
 C15 C19 H19A 109.5 . . ?
 C15 C19 H19B 109.5 . . ?
 C15 C19 H19C 109.5 . . ?
 H19A C19 H19B 109.5 . . ?
 H19A C19 H19C 109.5 . . ?
 H19B C19 H19C 109.5 . . ?
 N1 Cu1 N2 85.22(13) . . ?
 O1 Cu1 N1 92.44(12) . . ?
 O1 Cu1 N2 171.40(14) . . ?
 O1 Cu1 O3 87.78(11) . . ?
 O3 Cu1 N1 175.21(15) . . ?
 O3 Cu1 N2 95.25(13) . . ?
 C8 N1 C9 123.4(3) . . ?
 C8 N1 Cu1 126.4(3) . . ?
 C9 N1 Cu1 110.1(2) . . ?
 C14 N2 Cu1 112.6(2) . . ?
 C15 N2 C14 123.2(3) . . ?
 C15 N2 Cu1 121.4(3) . . ?
 C1 O1 Cu1 126.2(2) . . ?
 H1WA O1W H1WB 104.5 . . ?
 C6 O2 C7 118.1(4) . . ?
 C17 O3 Cu1 123.5(3) . . ?

loop_
  _geom_torsion_atom_site_label_1
  _geom_torsion_atom_site_label_2
  _geom_torsion_atom_site_label_3
  _geom_torsion_atom_site_label_4
  _geom_torsion
  _geom_torsion_site_symmetry_1
  _geom_torsion_site_symmetry_2
  _geom_torsion_site_symmetry_3
  _geom_torsion_site_symmetry_4
  _geom_torsion_publ_flag
 C1 C2 C3 C4 -0.8(7) . . . . ?
 C1 C2 C8 N1 6.4(7) . . . . ?
 C1 C6 O2 C7 -165.7(4) . . . . ?
 C2 C1 C6 C5 0.5(6) . . . . ?
 C2 C1 C6 O2 179.6(3) . . . . ?
 C2 C1 O1 Cu1 -12.9(5) . . . . ?
 C2 C3 C4 C5 0.0(7) . . . . ?
 C2 C8 N1 C9 -174.4(4) . . . . ?
 C2 C8 N1 Cu1 5.2(6) . . . . ?
 C3 C2 C8 N1 -176.7(4) . . . . ?
 C3 C4 C5 C6 1.0(7) . . . . ?
 C4 C5 C6 C1 -1.3(6) . . . . ?
 C4 C5 C6 O2 179.7(4) . . . . ?
 C5 C6 O2 C7 13.3(6) . . . . ?
 C6 C1 C2 C3 0.5(6) . . . . ?
 C6 C1 C2 C8 177.4(3) . . . . ?
 C6 C1 O1 Cu1 167.4(3) . . . . ?
 C8 C2 C3 C4 -177.8(4) . . . . ?
 C9 C10 C11 C12 52.1(6) . . . . ?
 C9 C14 N2 C15 -175.6(4) . . . . ?
 C9 C14 N2 Cu1 23.1(4) . . . . ?
 C10 C9 C14 C13 60.7(5) . . . . ?
 C10 C9 C14 N2 -172.4(4) . . . . ?
 C10 C9 N1 C8 -10.3(6) . . . . ?
 C10 C9 N1 Cu1 170.1(3) . . . . ?
 C10 C11 C12 C13 -53.6(6) . . . . ?
 C11 C12 C13 C14 58.7(6) . . . . ?
 C12 C13 C14 C9 -60.0(5) . . . . ?
 C12 C13 C14 N2 179.8(4) . . . . ?
 C13 C14 N2 C15 -55.7(6) . . . . ?
 C13 C14 N2 Cu1 143.0(3) . . . . ?
 C14 C9 C10 C11 -57.5(5) . . . . ?
 C14 C9 N1 C8 -138.8(4) . . . . ?
 C14 C9 N1 Cu1 41.6(4) . . . . ?
 C15 C16 C17 C18 -178.6(4) . . . . ?
 C15 C16 C17 O3 4.4(8) . . . . ?
 C16 C15 N2 C14 179.3(3) . . . . ?
 C16 C15 N2 Cu1 -21.0(5) . . . . ?
 C16 C17 O3 Cu1 3.6(6) . . . . ?
 C18 C17 O3 Cu1 -173.6(3) . . . . ?
 C19 C15 C16 C17 -174.1(5) . . . . ?
 C19 C15 N2 C14 -0.9(6) . . . . ?
 C19 C15 N2 Cu1 158.8(3) . . . . ?
 N1 C9 C10 C11 175.6(4) . . . . ?
 N1 C9 C14 C13 -168.1(3) . . . . ?
 N1 C9 C14 N2 -41.3(4) . . . . ?
 N2 C15 C16 C17 5.7(7) . . . . ?
 O1 C1 C2 C3 -179.1(4) . . . . ?
 O1 C1 C2 C8 -2.3(6) . . . . ?
 O1 C1 C6 C5 -179.8(4) . . . . ?
 O1 C1 C6 O2 -0.7(5) . . . . ?

_shelx_res_file
;
    o.res created by SHELXL-2014/7

TITL o_a.res in P2(1)2(1)2(1)
CELL 0.71073 7.6261 12.8842 19.1444 90 90 90
ZERR 4 0.0008 0.0015 0.0022 0 0 0
LATT -1
SYMM 0.5+X,0.5-Y,-Z
SYMM -X,0.5+Y,0.5-Z
SYMM 0.5-X,-Y,0.5+Z
SFAC C H N O Cu
UNIT 76 96 12 12 4

L.S. 4
PLAN  -5
SIZE 0.2 0.18 0.23
TEMP 28.57
HTAB 2.00000
BOND $H
CONF
fmap 2
acta
MERG 2
REM <olex2.extras>
REM <HklSrc "%.\\o.hkl">
REM </olex2.extras>

WGHT    0.010000    0.294700
FVAR       0.41337
C1    1    0.713643    0.517420    0.507749    11.00000    0.03370    0.02791 =
         0.03278   -0.00460    0.00254    0.00297
C2    1    0.739952    0.500945    0.580047    11.00000    0.04046    0.03094 =
         0.03291   -0.00511   -0.00062    0.00468
C3    1    0.801544    0.581952    0.622963    11.00000    0.06004    0.04137 =
         0.03283   -0.00983   -0.00119   -0.00151
AFIX  43
H3    2    0.816890    0.570332    0.670516    11.00000   -1.20000
AFIX   0
C4    1    0.838812    0.676834    0.595772    11.00000    0.07350    0.03710 =
         0.04780   -0.01335   -0.00437   -0.00439
AFIX  43
H4    2    0.879441    0.729800    0.624534    11.00000   -1.20000
AFIX   0
C5    1    0.815775    0.694299    0.524501    11.00000    0.06733    0.02666 =
         0.04826   -0.00604   -0.00146    0.00003
AFIX  43
H5    2    0.843048    0.758877    0.505714    11.00000   -1.20000
AFIX   0
C6    1    0.753765    0.617805    0.482110    11.00000    0.04994    0.03103 =
         0.03546   -0.00296    0.00458    0.00852
C7    1    0.799568    0.716688    0.378226    11.00000    0.11442    0.04009 =
         0.05150    0.01259    0.00458   -0.00360
AFIX 137
H7A   2    0.740807    0.778171    0.394179    11.00000   -1.50000
H7B   2    0.785421    0.710290    0.328585    11.00000   -1.50000
H7C   2    0.922097    0.721270    0.389303    11.00000   -1.50000
AFIX   0
C8    1    0.697230    0.404151    0.612561    11.00000    0.04333    0.03866 =
         0.02888   -0.00112   -0.00119    0.00299
AFIX  43
H8    2    0.706402    0.400585    0.660942    11.00000   -1.20000
AFIX   0
C9    1    0.589852    0.227196    0.615942    11.00000    0.03300    0.04123 =
         0.03741    0.00441   -0.00110   -0.00733
AFIX  13
H9    2    0.462564    0.223557    0.609352    11.00000   -1.20000
AFIX   0
C10   1    0.620190    0.221741    0.694440    11.00000    0.05702    0.05056 =
         0.03829    0.00894   -0.00735   -0.01246
AFIX  23
H10A  2    0.567200    0.281610    0.716760    11.00000   -1.20000
H10B  2    0.745072    0.223159    0.704012    11.00000   -1.20000
AFIX   0
C11   1    0.540504    0.122337    0.724447    11.00000    0.07054    0.06774 =
         0.04341    0.01964   -0.00149   -0.02283
AFIX  23
H11A  2    0.573295    0.115739    0.773200    11.00000   -1.20000
H11B  2    0.413651    0.126415    0.721947    11.00000   -1.20000
AFIX   0
C12   1    0.602478    0.028403    0.684954    11.00000    0.05737    0.05235 =
         0.06437    0.02851   -0.01050   -0.01091
AFIX  23
H12A  2    0.541555   -0.032428    0.702338    11.00000   -1.20000
H12B  2    0.726805    0.018675    0.693414    11.00000   -1.20000
AFIX   0
C13   1    0.571423    0.037781    0.606988    11.00000    0.05200    0.03929 =
         0.06027    0.01134   -0.00172   -0.01000
AFIX  23
H13A  2    0.446633    0.043488    0.597964    11.00000   -1.20000
H13B  2    0.614243   -0.024084    0.583690    11.00000   -1.20000
AFIX   0
C14   1    0.665642    0.133274    0.577795    11.00000    0.02998    0.03905 =
         0.04742    0.01168   -0.00366   -0.00349
AFIX  13
H14   2    0.790435    0.127838    0.589451    11.00000   -1.20000
AFIX   0
C15   1    0.692501    0.086662    0.453870    11.00000    0.03329    0.02530 =
         0.05706   -0.00303    0.00238   -0.00373
C16   1    0.674482    0.108210    0.381750    11.00000    0.05432    0.04004 =
         0.04410   -0.01124    0.00554   -0.00548
AFIX  43
H16   2    0.697919    0.053105    0.351794    11.00000   -1.20000
AFIX   0
C17   1    0.627733    0.198228    0.350571    11.00000    0.03471    0.04226 =
         0.03899   -0.00993    0.00005   -0.00662
C18   1    0.612599    0.203648    0.272207    11.00000    0.06214    0.05843 =
         0.04054   -0.01147   -0.00032   -0.00479
AFIX 137
H18A  2    0.536517    0.259936    0.259520    11.00000   -1.50000
H18B  2    0.565069    0.139639    0.254876    11.00000   -1.50000
H18C  2    0.726565    0.214823    0.252282    11.00000   -1.50000
AFIX   0
C19   1    0.764674   -0.019315    0.470541    11.00000    0.05197    0.02852 =
         0.07566   -0.00550    0.00618    0.00491
AFIX 137
H19A  2    0.828603   -0.016475    0.513696    11.00000   -1.50000
H19B  2    0.841630   -0.041157    0.433680    11.00000   -1.50000
H19C  2    0.669783   -0.067852    0.474871    11.00000   -1.50000
AFIX   0
CU1   5    0.634113    0.302791    0.481074    11.00000    0.03625    0.02948 =
         0.03284   -0.00221    0.00080    0.00180
N1    3    0.647047    0.321459    0.580253    11.00000    0.03486    0.03512 =
         0.03414    0.00273    0.00334   -0.00387
N2    3    0.649823    0.154261    0.502025    11.00000    0.03506    0.03164 =
         0.03798    0.00087    0.00075   -0.00277
O1    4    0.655393    0.448251    0.463955    11.00000    0.05242    0.03049 =
         0.02876   -0.00174   -0.00208    0.00010

AFIX   6
O1W   4    0.595281    0.481748    0.307517    11.00000    0.09865    0.06319 =
         0.05180    0.00251   -0.02023    0.00863
H1WA  2    0.600652    0.420089    0.323138    11.00000   -1.50000
H1WB  2    0.620733    0.519699    0.342377    11.00000   -1.50000
AFIX   0

O2    4    0.726861    0.629264    0.411356    11.00000    0.08913    0.03130 =
         0.03591    0.00501   -0.00460   -0.00080
O3    4    0.600371    0.284852    0.382816    11.00000    0.05039    0.03520 =
         0.03385   -0.00331   -0.00161    0.00560
HKLF 4

REM  o_a.res in P2(1)2(1)2(1)
REM R1 =  0.0382 for    3547 Fo > 4sig(Fo)  and  0.0657 for all    4634 data
REM    241 parameters refined using      0 restraints

END

WGHT      0.0100      0.2947

REM Instructions for potential hydrogen bonds
EQIV $1 x-1/2, -y+1/2, -z+1
HTAB C13 O1_$1
EQIV $2 -x+1, y-1/2, -z+1/2
HTAB C18 O1W_$2
HTAB O1W O3
HTAB O1W O1
HTAB O1W O2

REM Highest difference peak  0.338,  deepest hole -0.387,  1-sigma level  0.058
Q1    1   0.4788  0.3033  0.4532  11.00000  0.05    0.34
Q2    1   0.7855  0.3006  0.4535  11.00000  0.05    0.32
Q3    1   0.6143  0.2006  0.5096  11.00000  0.05    0.30
Q4    1   0.4828  0.2994  0.5139  11.00000  0.05    0.28
Q5    1   0.5956  0.2626  0.4196  11.00000  0.05    0.27
;
_shelx_res_checksum                41272
_shelx_hkl_file
;
  -1   0   0    4.80    0.80
   2   0   0 4738.93  173.98
  -2   0   0 4758.52  173.98
  -3   0   0   -0.80    1.20
  -4   0   0 2344.27   87.79
   6   0   0   37.10    5.50
  -6   0   0   32.80    4.70
  -7   0   0    1.30    3.20
   7   0   0    0.20    3.10
  -8   0   0   93.99    9.00
   8   0   0   99.89    9.30
   9   0   0   -7.70    4.00
  10   0   0    4.60    5.90
  -1  -1   0 1264.67   45.50
   1   1   0 1211.98   45.70
  -1   1   0 1205.08   45.20
   3   1   0  171.38    8.30
  -3   1   0  174.68    8.00
  -3  -1   0  170.88    8.20
  -4  -1   0  324.97   14.50
  -4   1   0  326.97   14.20
   4   1   0  317.47   14.60
  -5  -1   0   15.60    3.30
   5   1   0   15.60    3.50
  -5   1   0   16.60    3.20
   6  -1   0  486.35   21.80
  -6   1   0  478.35   21.30
   6   1   0  488.05   22.10
  -6  -1   0  465.15   21.40
   7  -1   0    5.20    3.60
  -7  -1   0   11.50    3.90
   7   1   0    6.70    3.80
  -7   1   0    6.60    3.40
  -8  -1   0   37.50    6.90
   8   1   0   28.50    6.80
   8  -1   0   29.70    6.00
  -8   1   0   36.60    6.00
   9   1   0    7.20    4.90
   9  -1   0    3.20    4.60
  -9   1   0    7.90    4.80
  10   1   0   11.50    6.20
  10  -1   0    7.70    6.30
   0   2   0  993.60   36.80
  -1   2   0    4.40    0.80
   1   2   0    2.50    0.90
   1  -2   0    3.20    0.60
  -1  -2   0    2.30    1.00
   1   2   0    3.00    1.00
   2   2   0  170.58    8.00
  -2   2   0  179.38    7.50
   2  -2   0  171.58    7.30
  -2  -2   0  173.38    8.00
  -3  -2   0  375.66   15.70
  -3   2   0  367.16   15.10
   3   2   0  368.36   15.80
  -4   2   0 1572.24   59.99
  -4  -2   0 1558.24   60.49
   4   2   0 1630.44   60.89
  -5   2   0   24.80    3.60
  -5  -2   0   20.00    3.60
   5   2   0   20.30    3.90
  -6  -2   0   66.39    6.80
   6   2   0   68.59    7.20
  -6   2   0   59.29    6.40
   7  -2   0   64.79    7.10
  -7   2   0   55.59    6.90
  -7  -2   0   61.19    7.00
   7   2   0   55.79    7.30
   8  -2   0   89.29    9.00
  -8   2   0   91.89    8.80
   8   2   0   97.69   10.00
   9   2   0   -1.40    4.50
  -9   2   0    0.20    4.30
   9  -2   0    1.70    4.60
  10   2   0   -2.00    5.60
  10  -2   0   -1.20    5.10
   0   3   0    0.40    0.70
   0  -3   0    0.30    0.70
  -1   3   0  838.22   30.60
   1   3   0  812.02   31.10
   1  -3   0  801.62   30.50
   2   3   0  288.17   12.70
  -2   3   0  303.17   12.10
   2  -3   0  303.87   11.90
  -3   3   0   33.40    2.90
   3   3   0   35.30    3.70
  -4   3   0   89.99    5.70
   4   3   0   94.59    7.20
  -4  -3   0   85.69    6.60
  -5   3   0  108.89    7.00
   5   3   0  114.39    8.20
  -5  -3   0  110.89    7.70
   6   3   0  285.57   15.40
  -6   3   0  295.47   14.30
  -7   3   0   29.40    5.00
   7   3   0   29.50    5.60
  -8   3   0    0.10    3.60
   8  -3   0   -4.40    3.30
   8   3   0   12.70    5.20
   9   3   0   21.70    6.30
   9  -3   0   19.80    6.70
  -9   3   0   21.20    6.90
  10  -3   0    5.70    5.10
 -10   3   0    5.50    5.70
  10   3   0    8.70    6.40
   0   4   0  640.74   24.50
  -1   4   0  617.74   23.20
   1   4   0  616.14   23.80
   1  -4   0  588.74   23.10
   2  -4   0  180.08    8.00
   2   4   0  184.18    8.80
  -2   4   0  178.18    8.00
   3   4   0  536.35   22.20
  -3   4   0  533.15   21.20
   4   4   0  200.08   10.60
  -4   4   0  192.68    9.40
  -5   4   0   30.10    3.80
   5   4   0   28.70    4.80
   6   4   0  132.49    9.80
  -6   4   0  128.39    8.40
   7   4   0   61.79    8.00
  -7   4   0   57.49    6.70
   8  -4   0   27.50    5.40
  -8   4   0   20.30    5.00
   8   4   0   27.70    6.40
   9   4   0    3.90    5.70
  -9   4   0   -5.00    7.00
   0   5   0    0.20    1.00
  -1   5   0 1092.99   41.10
   1   5   0 1094.09   41.80
   2   5   0  133.89    7.30
  -2   5   0  132.39    6.50
  -3   5   0  336.57   14.00
   3   5   0  324.57   15.00
  -4   5   0   50.39    4.40
   4   5   0   52.39    5.40
  -5   5   0  404.26   17.70
   5   5   0  409.36   19.30
  -6   5   0    5.60    3.00
   6   5   0   11.10    4.40
   7   5   0    7.90    4.80
  -7   5   0    6.80    3.60
   8   5   0   39.30    7.40
  -8   5   0   39.50    6.20
   9  -5   0   34.70    6.50
  -9   5   0   26.30    6.10
   9   5   0   37.00    8.00
   0   6   0  552.34   21.90
  -1   6   0  863.21   33.00
   1   6   0  857.61   33.60
  -2   6   0   30.60    3.10
   3   6   0  927.51   37.90
  -3   6   0  976.60   36.90
   4   6   0  138.09    8.90
  -4   6   0  133.59    7.40
  -5   6   0    6.60    2.80
   5   6   0    4.00    3.40
   6   6   0    6.60    4.20
  -6   6   0    4.50    3.00
   7   6   0  186.88   13.10
  -7   6   0  173.18   11.00
   8   6   0   59.79    8.90
  -8   6   0   78.89    8.00
   9   6   0   20.00    6.90
   9  -6   0    0.60    4.20
  -9   6   0    4.50    4.80
   0   7   0   -0.60    1.30
   1   7   0  297.97   14.40
  -1   7   0  308.37   13.00
  -2   7   0  983.60   37.40
   2   7   0  948.31   38.20
   3   7   0  155.28    9.00
  -3   7   0  157.48    8.30
   4   7   0    8.20    3.00
  -4   7   0   11.40    2.70
   5   7   0  298.17   16.00
  -5   7   0  310.37   17.50
  -6   7   0  241.18   12.60
   6   7   0  242.58   14.80
  -7   7   0    9.80    3.90
   7   7   0   13.90    5.30
   8   7   0   24.70    7.10
  -8   7   0   25.40    5.00
   9  -7   0    9.80    4.80
  -9   7   0    9.30    5.10
   9   7   0   30.90   11.00
  -1   8   0   89.99    5.60
   1   8   0   89.29    6.00
  -2   8   0    9.10    2.40
   2   8   0    3.90    2.30
   3   8   0   97.79    7.30
  -3   8   0   90.29    6.30
   4   8   0  760.02   32.10
  -4   8   0  754.52   30.80
   5   8   0   -3.60    3.20
  -5   8   0    1.70    2.60
   6   8   0  117.19   10.60
  -6   8   0  120.79    8.30
  -7   8   0    4.70    3.70
   7   8   0    4.90    5.00
  -8   8   0   26.90    5.10
   8   8   0   24.20    7.00
   9   8   0    5.30    6.50
  -9   8   0   -3.10    5.20
   0   9   0   -1.80    1.80
  -1   9   0   24.40    3.50
   1   9   0   22.00    3.60
  -2   9   0  659.43   27.60
   2   9   0  627.74   27.00
  -3   9   0   25.20    4.70
   3   9   0   36.70    5.20
   4   9   0  191.08   11.90
  -4   9   0  202.98   10.80
  -5   9   0   44.70    5.60
   5   9   0   45.80    6.90
   6   9   0   64.59    8.40
  -6   9   0   66.09    6.80
   7   9   0   11.30    5.60
  -7   9   0    8.70    4.00
  -8   9   0   -6.10    4.30
   8   9   0    9.20    6.60
   0  10   0 1013.10   40.00
   1  10   0  105.39    7.50
  -1  10   0  116.79    7.30
   2  10   0  112.09    8.20
  -2  10   0  127.59    7.80
   3  10   0  107.39    8.20
  -3  10   0   93.29    7.10
   4  10   0  136.29   13.70
  -4  10   0  145.59    9.10
   5  10   0   -0.60    3.50
  -5  10   0   -0.70    2.90
   6  10   0    4.20    4.80
  -6  10   0    5.60    3.60
  -7  10   0    0.30    3.60
   7  10   0    1.00    5.40
  -8  10   0   19.70    6.10
   8  10   0   35.60    8.50
   0  11   0    3.60    2.50
  -1  11   0  126.69    8.10
   1  11   0  114.89    8.20
   2  11   0  392.26   19.00
  -2  11   0  422.26   18.60
  -3  11   0   32.90    4.70
  -4  11   0    1.10    3.40
   4  11   0    6.00    3.60
   5  11   0   24.30    5.30
  -5  11   0   34.20    4.90
  -6  11   0   73.19    7.70
   6  11   0   57.09    8.20
   7  11   0   -3.80    5.20
  -7  11   0    0.60    4.20
   0  12   0  307.67   15.20
   1  12   0   70.99    6.80
  -1  12   0   78.89    6.60
  -2  12   0    3.40    3.00
  -3  12   0   60.39    6.70
   3  12   0   67.69    7.60
  -4  12   0   81.39    8.10
   4  12   0   94.69    9.20
  -5  12   0   18.70    4.40
   5  12   0   15.60    5.80
   6  12   0    4.10    5.30
  -6  12   0    0.90    3.80
  -7  12   0   21.50    6.00
   7  12   0   36.40    8.30
   0  13   0    1.10    3.00
  -1  13   0  113.99    8.40
   1  13   0  118.59   10.20
   2  13   0   26.30    5.20
  -2  13   0   26.10    4.80
   3  13   0   25.40    5.50
  -3  13   0   13.50    4.20
  -4  13   0    4.70    4.40
   4  13   0    5.00    4.80
  -5  13   0  103.49    9.20
   5  13   0   87.19   10.50
  -6  13   0   13.60    5.10
   6  13   0   10.70    7.50
   0  14   0    5.10    3.80
   1  14   0   58.79    7.30
  -2  14   0    1.60    3.50
   2  14   0    3.30    3.70
   3  14   0  115.59   10.50
  -3  14   0  110.19    9.60
  -4  14   0   -1.10    4.60
   4  14   0   -0.50    4.70
  -5  14   0    7.70    4.80
   0  15   0    5.70    3.80
  -1  15   0   91.29    8.50
   1  15   0  100.79    9.40
  -2  15   0   -2.60    3.70
   2  15   0    3.20    4.10
   3  15   0    4.40    4.50
  -3  15   0    7.90    4.80
   4  15   0   -0.80    6.00
  -4  15   0   -6.80    5.90
   0  16   0    9.10    4.60
  -1  16   0   17.30    5.20
   1  16   0    6.20    4.80
   2  16   0    8.20    5.00
  -2  16   0   -6.00    3.80
  -3  16   0   -3.60    4.90
   0  17   0   -7.90    3.70
   1  17   0   -7.50    4.10
  -1  17   0   -4.30    4.20
  -1   0   1    3.80    0.80
  -1   0  -1    5.70    0.70
   2   0   1 9999.00  363.46
   2   0  -1 9918.71  363.66
   3   0   1  255.67   11.10
  -3   0  -1  261.67   11.10
  -3   0   1  253.37   11.30
   4   0   1  181.88    9.30
  -4   0  -1  185.28    9.10
  -4   0   1  187.48    9.50
  -5   0   1    6.40    2.70
  -5   0  -1    3.80    2.40
   5   0   1    4.60    2.40
  -6   0   1  425.46   19.80
   6   0   1  449.06   20.00
  -6   0  -1  420.96   19.40
   6   0  -1  432.56   20.30
  -7   0   1   14.70    3.90
   7   0   1    9.30    3.90
  -7   0  -1   11.20    3.60
   7   0  -1   14.60    4.20
   8   0  -1   29.90    6.00
   8   0   1   17.60    5.30
  -8   0   1   27.00    5.70
  -8   0  -1   26.80    5.20
  -9   0   1   -2.60    4.50
   9   0  -1    4.00    4.50
   9   0   1   -2.60    4.30
  10   0  -1   11.80    6.60
  10   0   1   11.10    6.50
  -1   1   1    0.20    0.60
   1   1  -1    0.10    0.50
   1   1   1    1.50    0.70
  -1   1  -1    2.10    0.50
  -2  -1  -1  678.93   26.10
  -2  -1  -1  691.03   26.10
   2  -1   1  688.63   25.70
  -2   1   1  701.03   26.10
  -2  -1   1  666.63   26.20
   2   1   1  663.73   26.10
   2  -1  -1  650.93   25.90
   2   1   1  695.73   26.20
  -3   1   1  177.38    8.40
  -3  -1  -1  182.88    8.50
  -3  -1   1  179.48    8.60
   3   1   1  186.98    8.60
  -3   1  -1  180.78    8.20
  -4  -1  -1 2360.76   88.29
   4   1  -1 2482.85   88.99
  -4   1   1 2338.37   88.29
  -4   1  -1 2306.27   87.89
  -4  -1   1 2280.07   88.49
   4   1   1 2375.96   88.49
  -5  -1  -1   48.90    4.80
   5  -1   1   50.69    4.80
  -5   1   1   54.49    6.00
   5   1  -1   51.09    5.30
  -5  -1   1   48.60    5.20
   5   1   1   52.29    5.00
  -5   1  -1   40.60    4.70
  -6  -1  -1   80.19    7.30
  -6   1   1   85.39    7.20
   6   1  -1   82.99    7.80
   6  -1   1   92.99    7.40
  -6  -1   1   86.29    7.30
  -6   1  -1   77.59    6.70
   6   1   1   81.69    7.30
  -7   1   1   10.80    3.90
   7  -1   1    6.40    3.50
  -7  -1  -1   11.10    3.80
   7   1  -1    7.00    4.10
   7  -1  -1   11.80    4.10
  -7   1  -1    9.20    3.70
   7   1   1    9.30    4.10
  -7  -1   1   10.80    4.00
   8   1  -1   70.49   12.40
   8  -1   1   79.79    8.60
  -8   1   1   85.69    8.50
   8   1   1   98.49    9.40
  -8   1  -1   86.89    8.50
   8  -1  -1   61.59    8.30
  -8  -1   1   89.39   13.20
   9   1  -1    5.30    5.00
  -9   1   1   13.90    5.30
   9  -1   1   -1.50    4.40
   9   1   1    6.50    4.80
  -9  -1   1   20.50    5.60
   9  -1  -1    6.10    5.20
  10  -1   1   -2.90    5.20
 -10   1   1   18.20    6.10
  10   1  -1   -4.80    5.70
  10   1   1    2.30    6.20
  10  -1  -1    7.30    6.20
   0   2  -1   95.69    4.10
  -1  -2  -1  660.43   25.70
   1   2  -1  666.03   25.80
   1   2  -1  660.83   25.80
  -1   2   1  667.03   25.90
   1  -2   1  653.83   25.00
  -1  -2   1  717.53   25.80
  -1   2  -1  694.33   25.10
   1   2   1  705.43   25.70
   1  -2  -1  669.43   25.40
  -1  -2   1  674.63   25.80
   2   2  -1  822.12   30.10
  -2   2   1  858.31   29.60
   2   2   1  734.63   29.70
  -2  -2   1  736.13   29.80
   2  -2  -1  726.33   29.40
  -3   2   1  575.64   22.80
   3  -2   1  559.94   22.30
   3   2  -1  582.14   23.40
  -3  -2   1  573.44   23.20
  -3   2  -1  587.24   22.40
   3   2   1  578.84   23.20
  -4   2   1   52.89    4.30
   4   2  -1   52.59    5.20
  -4  -2  -1   45.00    4.70
  -4  -2   1   37.60    4.50
   4   2   1   39.50    4.70
  -4   2  -1   50.79    4.10
   5   2  -1  142.19    9.20
  -5  -2  -1  145.89    8.70
  -5   2   1  134.59    9.30
  -5   2  -1  152.08    8.20
   5   2   1  153.18    9.00
  -5  -2   1  152.58    9.00
   6   2  -1  443.66   20.20
   6  -2   1  438.86   19.10
  -6   2   1  402.26   18.90
  -6  -2   1  393.16   19.20
  -6   2  -1  406.06   18.60
   6   2   1  397.66   19.60
   7  -2   1   24.20    4.90
   7   2  -1   24.80    5.50
  -7   2   1   36.20    5.30
  -7  -2   1   36.90    5.70
   7   2   1   25.50    5.20
  -7   2  -1   20.80    4.20
   8   2  -1    7.90    4.90
  -8   2   1   11.20    4.50
   8  -2   1    8.10    4.20
  -8  -2   1   16.70    5.20
  -8   2  -1   15.20    4.60
   8  -2  -1   13.70    4.80
   9   2  -1   17.10    6.30
  -9   2   1   28.20    6.10
  -9   2  -1   25.60    9.40
   9   2   1   25.00    6.30
   9  -2  -1   17.70    5.60
  10  -2   1   12.80    5.70
  10   2  -1    9.60    6.80
 -10   2   1   14.30    5.60
  10   2   1   12.70    6.80
  10  -2  -1    3.60    5.90
   0  -3   1  159.98    6.80
   0   3  -1  162.78    6.80
   0   3   1  163.08    6.90
   1   3  -1   58.19    3.60
   1  -3   1   60.59    3.00
  -1   3   1   58.79    3.20
   1   3   1   57.89    3.50
  -1   3  -1   62.29    2.90
  -2   3   1  172.68    7.70
   2  -3   1  159.18    7.00
   2   3  -1  163.18    8.10
   2  -3  -1  184.28    8.00
  -2   3  -1  167.88    7.20
  -2  -3   1  183.28    8.30
   2   3   1  173.08    8.10
  -3   3  -1   50.29    3.40
   3   3   1   48.80    4.20
  -3  -3   1   54.19    4.40
  -4   3   1   93.89    5.90
   4   3  -1   82.59    6.50
  -4   3  -1  101.99    5.60
  -4  -3   1   94.39    6.30
   5   3  -1  244.48   13.30
  -5   3   1  247.28   12.50
  -5  -3   1  259.27   13.10
   5   3   1  259.77   13.10
  -5   3  -1  254.67   12.00
   6   3  -1   54.59    6.90
  -6   3   1   54.79    6.20
  -6   3  -1   51.89    5.70
   6   3   1   43.20    5.80
  -6  -3   1   45.00    6.10
   7   3  -1   85.49    9.10
  -7   3   1   80.29    7.80
   7  -3   1   84.69    7.60
  -7   3  -1  101.99    8.10
   7   3   1   84.99    8.40
  -7  -3   1   94.29    8.60
  -8   3   1   82.99    8.50
   8   3  -1   96.39   10.20
   8  -3   1   94.39    8.80
   8  -3  -1   84.29    8.90
   8   3   1   80.79    9.80
  -8   3  -1   84.59    8.20
   9   3  -1   17.70    6.30
   9  -3   1    5.90    4.60
  -9   3   1    3.90    4.70
   9   3   1   -3.30    4.90
  -9   3  -1    9.00    4.80
   9  -3  -1    4.00    4.60
  10  -3   1   -6.30    4.50
  10   3  -1    1.80    6.10
 -10   3   1    6.30    6.10
  10   3   1   -8.70    5.40
  10  -3  -1   -6.40    4.90
   0   4  -1  110.09    5.30
   0  -4   1  110.29    5.30
   0   4   1  112.19    5.30
  -1   4   1  171.28    7.70
   1  -4   1  160.08    7.30
   1   4  -1  163.98    8.10
   1   4   1  192.28    8.20
  -1   4  -1  201.38    7.50
   2  -4   1   43.00    2.60
   2   4  -1   51.99    4.00
  -2   4   1   48.80    3.30
  -2   4  -1   50.29    3.00
   2   4   1   48.50    4.60
  -3   4   1  271.37   12.10
   3   4  -1  276.17   13.00
   3   4   1  287.47   12.90
  -3   4  -1  282.27   11.70
   4   4  -1  169.18    9.40
  -4   4   1  162.38    8.30
   4   4   1  154.98    9.00
  -4   4  -1  149.29    7.80
   5   4  -1  130.79    8.80
  -5   4   1  117.29    8.80
   5   4   1  130.39    8.80
  -5   4  -1  130.79    7.50
   6   4  -1   48.10    6.50
  -6   4   1   34.90    5.00
  -6   4  -1   41.90    5.60
   6   4   1   52.09    6.60
  -7   4   1   35.80    5.00
  -7   4  -1   31.90    5.00
   7   4   1   30.50    5.60
   8   4  -1   16.80    5.80
   8  -4   1    9.20    4.10
  -8   4   1   15.40    4.70
   8   4   1   14.60    5.30
  -8   4  -1   10.90    4.10
   9  -4   1   16.10    5.50
   9   4  -1   18.50    7.10
  -9   4   1   26.70    5.80
   9   4   1   16.30    6.60
   9  -4  -1   22.80    6.10
  -9   4  -1   26.00    6.00
   0   5  -1   16.80    2.10
   0   5   1   19.10    2.20
   1   5  -1  597.84   23.20
  -1   5   1  597.64   22.80
   1   5   1  563.34   23.10
  -1   5  -1  571.44   22.40
   2   5  -1  174.88    8.80
  -2   5   1  177.38    8.30
  -2   5  -1  168.68    7.80
   2   5   1  173.38    8.70
  -3   5   1  711.63   27.60
   3   5  -1  701.63   28.60
   3   5   1  700.13   28.40
  -3   5  -1  679.03   27.00
   4   5  -1    4.90    2.80
  -4   5   1    5.40    2.20
  -4   5  -1    7.90    2.00
   4   5   1    6.30    2.80
   5   5  -1   36.10    5.20
   5   5   1   33.70    5.00
  -5   5  -1   39.00    4.50
  -6   5   1   42.10    5.30
   6   5  -1   40.50    5.90
   6   5   1   49.10    6.60
  -6   5  -1   44.00    7.70
  -7   5   1   95.59    8.60
   7   5  -1   98.89    9.90
  -7   5  -1   95.89    7.80
   7   5   1  100.39    9.60
   8  -5   1   -1.80    3.40
  -8   5   1    5.80    3.90
   8   5  -1    4.80    5.60
  -8   5  -1    0.70    3.70
   8   5   1    2.30    4.50
   9  -5   1   -3.30    4.00
   9   5  -1    4.60    6.30
  -9   5   1   -2.80    4.80
  -9   5  -1    3.80    4.50
   9   5   1    0.80    5.80
   9  -5  -1   -2.90    4.00
   0   6   1  338.07   14.00
   0   6  -1  328.87   13.90
   1   6  -1 1405.26   52.39
  -1   6   1 1401.06   51.89
  -1   6  -1 1364.16   51.59
   1   6   1 1331.77   52.29
   2   6  -1  189.08   10.70
  -2   6   1  193.58    9.10
  -2   6  -1  185.28    8.60
   3   6  -1   91.29    6.40
  -3   6   1   93.49    5.80
  -3   6  -1   81.49    5.20
   3   6   1   83.79    6.20
  -4   6   1   23.50    3.30
   4   6  -1   31.50    4.90
  -4   6  -1   30.60    3.50
   4   6   1   28.70    4.30
  -5   6   1  281.47   13.70
   5   6  -1  283.27   15.00
  -5   6  -1  275.47   12.80
   5   6   1  270.07   14.40
  -6   6   1   81.39    6.90
   6   6  -1   72.79    8.60
   6   6   1   88.99    8.50
  -6   6  -1   79.39    9.90
  -7   6   1   20.60    4.70
   7   6  -1    9.50    5.00
  -7   6  -1   24.00    4.30
   7   6   1   15.90    5.30
   8   6  -1    4.50    5.40
  -8   6   1   12.10    4.70
   8   6   1   21.10    6.30
  -8   6  -1   13.30    4.40
   9   6  -1   65.09   10.40
  -9   6   1   49.50    7.70
   9  -6   1   42.30    6.70
  -9   6  -1   50.89    7.30
   9   6   1   84.49   10.80
   0   7   1  490.65   20.00
   0   7  -1  485.95   19.80
   1   7  -1  234.08   11.10
  -1   7   1  223.48   10.60
  -1   7  -1  250.07   10.50
  -2   7   1    7.10    2.10
   2   7  -1    9.10    2.80
  -2   7  -1    6.80    1.90
   2   7   1    5.80    2.50
   3   7  -1  156.08    9.10
  -3   7   1  145.39    8.30
   3   7   1  148.49    9.00
  -3   7  -1  161.18    8.00
   4   7  -1  311.87   15.30
  -4   7   1  285.87   14.10
  -4   7  -1  311.47   13.40
   4   7   1  293.57   14.90
  -5   7   1  134.99    8.40
   5   7  -1  132.99    9.80
   5   7   1  121.89    9.10
  -5   7  -1  124.09    7.70
   6   7  -1    8.20    4.60
  -6   7   1   13.90    3.80
   6   7   1   10.60    4.60
  -6   7  -1   11.10    3.50
  -7   7   1  161.38   10.60
   7   7  -1  171.78   13.10
  -7   7  -1  146.19   10.10
   7   7   1  158.98   12.40
  -8   7   1   75.19    8.80
   8   7  -1   67.19   10.00
   8   7   1   92.79   11.10
  -8   7  -1   63.59    8.20
   9  -7   1   -8.30    3.80
  -9   7   1   -8.30    5.00
   9   7   1   12.00    7.50
  -9   7  -1   -2.50    5.10
   0   8  -1   38.10    3.80
   0   8   1   36.70    3.70
   1   8  -1   74.79    5.40
  -1   8   1   75.89    5.50
   1   8   1   62.19    5.20
  -1   8  -1   64.69    4.60
   2   8  -1  356.16   17.00
  -2   8   1  397.36   16.80
   2   8   1  370.66   17.10
  -2   8  -1  405.56   16.40
  -3   8   1   79.79    7.10
   3   8  -1  102.99    7.50
   3   8   1  111.99    7.70
  -3   8  -1   99.39    6.30
   4   8  -1    2.50    3.40
   4   8   1    5.80    3.20
   5   8  -1   34.80    5.60
  -5   8   1   51.49    5.60
  -5   8  -1   41.50    4.90
   5   8   1   29.90    5.10
   6   8  -1  208.58   13.50
  -6   8   1  199.98   11.50
   6   8   1  195.98   13.20
  -6   8  -1  182.18   10.50
  -7   8   1    1.20    3.60
   7   8  -1   16.50    6.00
   7   8   1    7.10    5.00
  -7   8  -1    1.60    3.60
   8   8  -1   14.90    6.40
  -8   8   1   14.80    4.90
  -8   8  -1   17.20    4.60
   8   8   1   31.00    7.20
   9   8  -1   10.50    7.10
   9   8   1    5.70    6.80
   0   9  -1  641.94   26.30
   0   9   1  652.03   26.50
   1   9  -1  106.89    6.90
  -1   9   1   93.79    6.30
   1   9   1   97.79    6.60
  -1   9  -1  100.09    6.90
   2   9  -1   96.89    7.20
  -2   9   1   99.29    6.70
   2   9   1   87.29    7.00
  -2   9  -1   93.89    6.40
  -3   9   1    8.10    3.10
   3   9  -1   13.80    3.60
   3   9   1    8.70    3.10
  -3   9  -1   10.20    2.90
   4   9  -1  107.59    8.80
  -4   9   1  120.09    8.40
   4   9   1  128.39    9.30
  -4   9  -1  142.69    8.20
   5   9  -1    1.50    3.80
  -5   9   1    1.10    3.10
   5   9   1   -0.30    3.80
  -5   9  -1    7.40    3.60
  -6   9   1    6.80    3.90
   6   9  -1    0.30    4.60
  -6   9  -1    2.00    3.00
   6   9   1    4.90    4.80
  -7   9   1    1.70    3.70
   7   9  -1   12.20    5.90
   7   9   1    0.00    5.10
  -7   9  -1    6.20    4.00
   8   9  -1   61.49   11.00
  -8   9   1   47.00    6.50
   8   9   1   61.19   10.10
  -8   9  -1   48.60    6.50
   0  10  -1   58.79    5.40
   0  10   1   45.80    5.10
  -1  10   1  103.69    7.20
   1  10  -1  104.89    7.40
  -1  10  -1  117.99    7.10
   1  10   1  106.29    7.30
  -2  10   1  266.77   13.60
   2  10  -1  250.57   13.90
  -2  10  -1  317.67   13.60
   2  10   1  292.47   14.30
  -3  10   1    5.10    3.10
   3  10  -1    9.90    3.20
   3  10   1   10.40    3.80
  -3  10  -1    5.30    2.70
  -4  10   1   14.20    3.80
   4  10  -1   11.80    5.80
   4  10   1   27.10    5.80
  -4  10  -1   27.80    3.90
   5  10  -1    7.40    4.60
  -5  10   1   14.40    3.80
   5  10   1   21.00    5.30
  -5  10  -1   16.00    3.60
   6  10  -1   75.29    9.90
  -6  10   1   72.29    7.30
  -6  10  -1   70.29    7.40
   6  10   1   70.29    9.00
  -7  10   1    4.70    4.20
   7  10  -1    8.30    5.50
  -7  10  -1    2.60    3.90
   7  10   1   -0.30    5.10
   8  10  -1    6.80    6.70
  -8  10   1   -0.30    4.80
   8  10   1    0.10    6.10
   0  11   1   86.99    6.90
   0  11  -1   96.59    7.10
   1  11  -1   42.80    5.30
  -1  11   1   44.10    5.40
   1  11   1   38.10    5.00
  -1  11  -1   42.00    4.80
   2  11  -1   81.59    7.30
  -2  11   1   79.29    6.90
  -2  11  -1   84.59    6.70
   2  11   1   73.59    7.20
  -3  11   1   25.70    4.60
   3  11  -1   32.90    8.10
  -3  11  -1   20.40    4.00
  -4  11   1  239.38   13.50
   4  11  -1  238.38   14.10
  -4  11  -1  254.47   13.10
   4  11   1  249.38   14.50
  -5  11   1   21.00    4.50
   5  11  -1   16.20    4.60
  -5  11  -1   23.20    4.30
   5  11   1   15.50    4.70
  -6  11   1    6.90    3.80
   6  11  -1   -0.30    4.70
   6  11   1   10.60    5.30
  -6  11  -1    7.70    3.80
  -7  11   1    7.00    4.70
   7  11  -1   18.80    7.90
   7  11   1   12.80    6.50
  -7  11  -1    6.60    4.40
   0  12   1    4.40    3.00
   0  12  -1    6.30    3.00
  -1  12   1   58.59    6.20
   1  12  -1   59.29    6.30
  -1  12  -1   49.70    5.70
   1  12   1   49.20    6.20
   2  12  -1  153.18   10.80
  -2  12   1  138.59    9.20
  -2  12  -1  148.89    9.10
   2  12   1  115.49   11.60
  -3  12   1   29.50    5.00
   3  12  -1   43.90    6.10
   3  12   1   37.40    6.00
  -3  12  -1   20.30    4.40
   4  12  -1    3.00    3.80
  -4  12   1    0.60    3.70
  -4  12  -1    9.70    3.80
   4  12   1    3.70    3.90
  -5  12   1   39.30    5.90
   5  12  -1   40.50    7.00
   5  12   1   38.00    7.40
  -5  12  -1   38.60    5.30
   6  12  -1   52.29    9.10
  -6  12   1   49.99    6.60
  -6  12  -1   38.00    5.60
   6  12   1   38.40    7.30
   7  12  -1    1.00    5.70
  -7  12   1   -6.60    4.60
   7  12   1    6.80    6.40
   0  13   1   56.59    6.50
   0  13  -1   56.99    6.30
  -1  13   1   60.99    6.90
  -1  13  -1   63.19    6.60
   1  13   1   56.49    6.90
  -2  13   1    0.70    3.20
   2  13  -1    1.70    3.50
  -2  13  -1   -1.50    3.00
   2  13   1    5.50    3.40
   3  13  -1  101.69    9.40
  -3  13   1   94.49    8.70
  -3  13  -1   89.59    8.30
   3  13   1  108.49    9.50
  -4  13   1   11.20    4.90
   4  13  -1   19.50    5.80
   4  13   1   21.40    5.50
  -4  13  -1   21.20    4.80
  -5  13   1   14.50    5.20
   5  13  -1   24.10    6.20
  -5  13  -1    9.00    4.20
   5  13   1    8.20    5.00
   6  13  -1   10.10    8.70
  -6  13   1   -2.70    4.40
   6  13   1    3.30    6.40
  -6  13  -1    4.80    4.50
   0  14  -1   -0.20    3.10
   0  14   1    2.90    3.40
   1  14  -1   60.39    7.20
  -1  14   1   62.59    7.40
   1  14   1   48.20    6.50
  -1  14  -1   55.99    6.90
   2  14  -1    7.10    4.10
   2  14   1   -1.20    3.50
  -2  14  -1    4.10    3.70
  -3  14   1   43.50    7.30
   3  14  -1   65.59    8.40
   3  14   1   73.19    9.10
  -3  14  -1   43.10    6.30
   4  14  -1    7.30    5.10
  -4  14   1   -3.20    5.00
  -4  14  -1    7.20    4.80
   4  14   1    0.10    4.90
  -5  14   1   68.69   11.70
  -5  14  -1   55.89    7.10
   0  15   1    2.90    3.70
   0  15  -1    4.80    3.90
   1  15  -1   42.90    6.60
  -1  15   1   39.40    6.30
   1  15   1   39.00    6.40
  -1  15  -1   46.00    6.30
  -2  15   1    5.80    4.50
   2  15  -1    3.70    4.10
  -2  15  -1    1.10    3.90
   2  15   1    0.60    4.30
  -3  15   1   26.30    5.80
   3  15  -1   35.00    6.70
  -3  15  -1   15.30    6.20
   3  15   1   31.20    6.70
  -4  15   1   -1.00    5.20
   4  15  -1    6.80    6.10
   4  15   1    9.20    8.60
  -4  15  -1   -0.50    4.70
   0  16   1    4.20    4.60
   0  16  -1    3.50    3.90
   1  16  -1    4.30    4.20
  -1  16   1    5.80    4.50
  -1  16  -1   -3.60    3.80
   1  16   1    4.20    4.40
   2  16  -1    7.20    5.00
  -2  16   1   -3.70    4.10
  -2  16  -1   -5.50    4.00
   2  16   1    5.90    5.00
   3  16  -1   10.20    7.10
  -3  16   1    4.00    4.70
  -3  16  -1    2.60    5.00
   0  17   1   -3.20    4.20
   0  17  -1   -3.10    4.10
  -1  17   1   -1.50    4.20
   1  17  -1   -8.60    4.10
   1  17   1   -3.50    4.30
  -1  17  -1   -8.80    4.00
  -1   0   2   16.90    1.80
  -1   0  -2   13.70    1.00
   1   0  -2    8.80    1.20
   2   0   2 4021.90  147.39
   2   0   2 4072.19  147.39
  -2   0   2 3970.30  147.89
  -3   0  -2    6.70    1.60
  -3   0   2    6.70    1.80
   3   0   2    6.40    1.60
  -4   0   2  357.66   15.80
   4   0   2  350.96   15.30
  -4   0  -2  358.46   15.10
   5   0   2   14.70    3.10
  -5   0  -2   15.80    2.90
  -5   0   2   15.50    3.40
  -6   0  -2  152.78    9.40
   6   0   2  169.68   10.20
  -6   0   2  170.38   10.30
  -7   0   2    9.70    4.10
   7   0  -2    9.10    4.20
   7   0   2   15.80    4.10
  -8   0   2   74.59   12.00
   8   0   2   59.69    7.80
  -9   0   2   13.90    5.40
   9   0   2    2.30    4.40
   9   0  -2    6.30    5.30
  10   0  -2   19.30    7.00
 -10   0   2   25.80    6.70
  10   0   2    8.80    6.00
  -1   1   2  673.03   24.40
   1  -1   2  681.33   23.60
   1   1  -2  644.34   24.40
   1  -1   2  666.43   23.60
   1  -1  -2  548.55   24.20
  -1  -1   2  638.94   24.40
   2  -1   2 2719.13   97.39
   2  -1   2 2728.53   97.39
  -2   1   2 2679.83   98.09
  -2  -1  -2 2762.92   97.99
  -2   1  -2 2549.74   97.29
   2   1   2 2590.74   97.89
   2   1   2 2671.43   97.99
  -2  -1   2 2536.75   98.19
   3  -1   2    0.80    0.90
   3  -1   2    1.60    1.20
  -3   1   2    2.40    1.60
  -3  -1   2    3.70    1.70
  -3   1  -2    1.70    1.20
   3   1   2    3.80    1.60
   4  -1   2  501.95   19.90
  -4   1   2  480.45   20.30
   4   1   2  472.05   20.20
  -4   1  -2  489.95   19.70
  -4  -1   2  480.05   20.50
  -5   1   2   48.40    5.20
   5  -1   2   58.59    4.90
   5   1  -2   49.99    5.60
  -5  -1   2   57.89    5.60
  -5   1  -2   62.39    4.90
  -6   1   2  268.97   13.60
   6   1  -2  265.97   14.30
   6  -1   2  263.87   13.20
  -6   1  -2  243.38   12.70
  -6  -1   2  252.27   13.70
   6   1   2  239.58   13.40
   7   1  -2   14.40    4.40
   7  -1   2   17.00    4.50
  -7   1   2   16.70    4.20
   7   1   2   17.10    4.30
  -7  -1   2   16.80    4.50
  -7   1  -2   12.80    3.80
   8  -1   2   30.90    5.90
   8   1  -2   40.70    7.30
  -8   1   2   52.69    7.20
   8   1   2   45.40    6.60
  -8  -1   2   49.40    6.90
   8  -1  -2   40.80    6.80
   9   1  -2    8.50    5.30
  -9   1   2   17.70    5.30
   9   1   2   12.30    5.40
  -9  -1   2    6.50    4.70
   9  -1  -2    3.80    5.20
 -10   1   2    9.00    5.80
  10  -1   2    0.10    5.10
  10   1  -2   -0.80    6.30
  10  -1  -2   -0.80    5.60
  10   1   2    1.90    5.90
   0   2   2  179.58    7.40
   0  -2  -2  178.98    7.40
   0   2  -2  184.58    7.30
   0   2  -2  184.08    7.30
   0  -2   2  176.68    7.20
   1   2  -2 1061.09   39.70
   1  -2   2 1041.10   38.70
  -1   2   2 1072.09   39.60
  -1  -2  -2 1043.00   39.60
  -1   2  -2 1070.89   38.70
   1   2   2 1068.19   39.60
  -1  -2   2 1046.80   39.70
   2   2  -2  236.28   10.30
  -2   2   2  240.98   10.00
   2  -2   2  236.98    9.10
   2   2   2  228.68   10.00
  -2   2  -2  226.38    9.10
  -2  -2   2  227.28   10.20
   3   2  -2  191.48    9.30
  -3   2   2  189.18    8.90
   3  -2   2  195.88    8.00
  -3   2  -2  181.08    8.00
  -3  -2   2  177.68    9.10
   3   2   2  188.68    9.00
  -4   2   2 1095.59   40.20
  -4   2  -2  999.40   39.10
   4   2   2  983.80   40.00
  -5   2   2   98.89    7.10
   5  -2   2  100.69    6.60
   5   2  -2  107.59    8.10
  -5  -2   2  118.59    7.80
  -5   2  -2  113.99    6.70
   5   2   2  124.29    7.70
   6  -2   2   89.29    7.80
   6   2  -2   83.69    8.10
  -6   2   2   88.09    7.30
  -6   2  -2   76.69    7.50
   6   2   2   78.99    7.30
  -6  -2   2   89.79    7.60
  -7   2   2   92.79    8.00
   7  -2   2   78.89    7.50
   7   2  -2   72.39    8.50
  -7   2  -2  107.59    7.80
   7   2   2   99.59    8.30
  -7  -2   2   90.79    8.50
   8   2  -2   29.20    6.60
   8  -2   2   29.10    5.60
  -8   2   2   45.00    6.20
   8  -2  -2   22.90    5.30
  -8   2  -2   35.50    5.50
   8   2   2   42.40    7.80
  -8  -2   2   25.90    5.90
   9   2  -2    1.60    5.40
  -9   2   2    6.70    4.80
   9  -2   2    1.40    4.60
   9   2   2    3.80    5.10
  -9  -2   2    8.20    5.40
   9  -2  -2   -4.40    4.20
  10   2  -2    4.30    6.30
 -10   2   2    4.00    5.50
  10  -2   2   -3.80    4.50
  10   2   2   -7.60    5.70
  10  -2  -2    4.80    5.90
   0  -3   2    0.60    0.80
   0   3  -2    1.00    0.80
   0   3   2    1.20    0.90
   0  -3  -2    0.30    0.70
  -1   3   2 1340.67   50.39
   1  -3   2 1297.37   49.70
   1   3  -2 1327.27   50.69
  -1  -3   2 1389.66   50.69
  -1   3  -2 1361.96   49.70
   1   3   2 1349.96   50.59
   1  -3  -2 1396.06   50.79
  -2   3   2  257.47   11.80
   2  -3   2  256.87   10.80
   2   3  -2  254.97   12.20
  -2   3  -2  311.07   11.10
   2   3   2  315.27   12.30
  -2  -3   2  307.37   12.40
   3  -3   2  390.16   15.40
   3   3  -2  389.76   17.00
  -3   3   2  411.36   16.50
  -3  -3   2  395.26   16.90
   3   3   2  381.36   16.60
  -3   3  -2  387.76   15.50
   4   3  -2  106.09    7.20
  -4   3   2   97.09    6.50
  -4  -3   2  108.99    7.00
  -4   3  -2  108.79    5.80
  -5   3   2  131.39    8.30
   5   3  -2  138.29    9.20
  -5  -3   2  141.19    8.90
  -5   3  -2  130.89    7.40
   5   3   2  130.49    8.50
  -6   3   2   54.09    6.40
   6   3  -2   60.99    7.10
   6  -3   2   57.29    5.60
  -6   3  -2   57.09    5.70
  -6  -3   2   50.39    6.40
   6   3   2   45.80    6.00
   7  -3   2   45.40    5.70
  -7   3   2   37.80    5.70
   7   3  -2   37.10    6.60
   7   3   2   50.19    6.70
  -7  -3   2   39.50    6.00
  -7   3  -2   40.20    5.10
   8  -3   2    4.00    3.90
  -8   3   2   11.80    4.70
   8   3  -2    3.20    4.90
  -8  -3   2   14.20    5.20
   8   3   2    5.10    4.40
  -8   3  -2    5.70    3.70
   9   3  -2   35.60    7.80
   9  -3   2   31.20    6.20
  -9   3   2   28.50    6.20
   9  -3  -2   29.00    6.60
   9   3   2   42.60    7.30
   0   4  -2   27.70    2.20
   0   4   2   23.80    2.30
   0  -4   2   27.60    2.20
   1   4  -2 1022.80   39.10
   1  -4   2  996.60   38.20
  -1   4   2 1047.40   38.80
  -1   4  -2 1033.10   38.10
   1   4   2 1028.50   39.00
  -2   4   2   36.10    3.20
   2  -4   2   35.20    2.10
   2   4  -2   36.30    3.50
  -2   4  -2   27.00    2.50
   2   4   2   31.50    3.30
   3  -4   2  800.52   30.50
   3   4  -2  806.22   32.50
  -3   4   2  802.02   31.60
  -3  -4   2  840.22   32.40
   3   4   2  790.42   32.00
  -3   4  -2  816.42   30.70
  -4   4   2   38.40    4.30
   4   4  -2   36.30    4.80
  -4  -4   2   39.90    4.90
   4   4   2   48.20    4.80
  -4   4  -2   41.80    3.50
  -5   4   2  110.09    7.30
   5   4  -2  115.09    8.40
   5   4   2   92.79    7.30
  -5   4  -2   93.69    6.10
  -5  -4   2   92.69    7.60
   6   4  -2   -0.60    3.40
  -6   4   2    0.00    3.00
  -6  -4   2    2.30    3.30
  -6   4  -2    1.90    2.60
   6   4   2   -0.80    3.00
   7  -4   2  100.89    7.80
  -7   4   2   92.99    8.20
   7   4  -2   95.09   12.10
  -7   4  -2   80.59    7.30
   7   4   2   92.19    9.20
  -8   4   2    4.80    4.20
   8  -4   2    6.40    4.20
   8   4  -2    4.00    5.50
  -8   4  -2    2.40    3.70
   8   4   2   -0.20    4.00
   9  -4   2    5.80    4.50
   9   4  -2   11.10    6.10
  -9   4   2    5.40    5.00
   9   4   2    7.30    5.70
   9  -4  -2    5.90    4.50
  -9   4  -2    7.90    4.60
   0   5   2  535.85   21.10
   0   5  -2  533.75   20.90
   1   5  -2 1397.46   53.09
   1  -5   2 1355.76   52.19
  -1   5   2 1433.76   52.79
  -1   5  -2 1420.96   52.19
   1   5   2 1406.86   52.99
   2   5  -2  144.09    7.70
  -2   5   2  135.89    7.10
   2  -5   2  129.89    6.00
   2   5   2  139.09    7.40
  -2   5  -2  139.59    6.30
   3  -5   2  359.66   13.90
   3   5  -2  357.26   15.80
  -3   5   2  358.76   15.10
   3   5   2  325.47   15.30
  -3   5  -2  322.97   13.90
   4   5  -2  111.09    7.90
  -4   5   2  113.19    7.10
   4   5   2  111.79    7.30
  -4   5  -2  112.49    6.00
  -5   5   2  569.64   23.90
   5   5  -2  549.95   24.90
  -5   5  -2  564.54   22.70
   5   5   2  549.95   24.50
  -6   5   2   17.00    4.10
   6   5  -2    9.40    4.50
   6   5   2   25.40    4.80
  -6   5  -2   20.40    3.40
   7   5  -2   16.60    5.20
  -7   5   2   18.50    4.30
   7   5   2   18.50    6.00
  -7   5  -2   16.30    3.90
   8  -5   2    4.60    3.80
  -8   5   2    9.50    4.20
   8   5  -2   10.40    5.60
  -8   5  -2    4.00    3.90
   8   5   2   -1.70    3.90
   9   5  -2   37.40    8.50
  -9   5   2   23.50    6.20
   9  -5   2   11.30    5.00
   9   5   2   27.10    7.20
  -9   5  -2   25.90    5.50
   0   6  -2  485.05   19.40
   0   6   2  483.75   19.60
  -1   6   2  677.43   25.80
   1   6  -2  669.63   26.10
   1   6   2  623.44   26.00
  -1   6  -2  645.14   25.20
   2   6  -2  479.55   22.10
  -2   6   2  506.25   20.50
  -2   6  -2  485.55   19.60
   2   6   2  527.95   21.70
   3   6  -2 1175.38   46.00
  -3   6   2 1149.48   45.10
  -3   6  -2 1182.88   44.10
   3   6   2 1152.38   45.60
  -4   6   2   48.30    5.80
   4   6  -2   55.09    6.10
   4   6   2   54.79    5.40
  -4   6  -2   58.99    4.20
   5   6  -2  116.29    8.60
  -5   6   2   93.39    7.20
  -5   6  -2   84.69    5.90
   5   6   2   83.99    7.30
   6   6  -2    5.70    3.90
  -6   6   2    6.70    3.30
   6   6   2   11.40    3.90
  -6   6  -2    8.70    2.90
  -7   6   2  182.88   11.60
   7   6  -2  177.78   13.50
   7   6   2  195.68   13.10
  -7   6  -2  190.58   10.80
  -8   6   2   22.70    5.20
   8   6  -2   23.40    7.00
   8  -6   2   15.50    4.40
   8   6   2   22.90    6.30
  -8   6  -2   25.60    5.10
  -9   6   2   16.60    6.00
   9   6  -2    2.50    6.80
   9  -6   2   -2.30    4.10
   9   6   2    8.00    6.30
  -9   6  -2    3.30    4.70
   0   7  -2   11.80    2.20
   0   7   2    7.30    2.00
  -1   7   2  443.76   18.30
   1   7  -2  437.16   18.60
  -1   7  -2  444.46   17.70
   1   7   2  430.86   18.60
  -2   7   2  497.75   20.90
   2   7  -2  463.45   21.10
  -2   7  -2  521.35   20.20
   2   7   2  527.25   21.50
  -3   7   2  341.57   16.00
   3   7  -2  363.46   16.60
  -3   7  -2  359.46   14.90
   3   7   2  351.86   16.40
  -4   7   2   67.79    5.80
   4   7  -2   68.29    6.70
  -4   7  -2   54.39    4.30
   4   7   2   51.39    5.70
  -5   7   2  314.67   15.60
   5   7  -2  337.67   17.30
  -5   7  -2  322.67   14.40
   5   7   2  338.37   16.80
  -6   7   2  100.39    8.20
   6   7  -2  105.79   10.10
  -6   7  -2  113.79    7.40
   6   7   2  113.49   10.20
  -7   7   2   17.90    4.40
   7   7  -2   15.80    5.60
   7   7   2   11.30    5.30
  -7   7  -2   13.90    3.90
  -8   7   2   29.40    5.80
   8   7  -2   38.00    8.30
   8  -7   2   30.60    5.10
   8   7   2   39.50    7.60
  -8   7  -2   27.00    5.00
   9  -7   2   20.90    6.40
  -9   7   2   36.20    6.80
   9   7  -2   23.70   12.10
  -9   7  -2   13.30    6.10
   9   7   2   22.70    8.20
   0   8  -2  499.65   20.70
   0   8   2  509.25   21.00
   1   8  -2  166.58    8.80
  -1   8   2  164.18    8.40
  -1   8  -2  160.68    7.90
   1   8   2  147.59    8.50
  -2   8   2   30.20    3.80
   2   8  -2   24.10    3.80
   2   8   2   38.60    4.30
  -2   8  -2   33.80    3.50
   3   8  -2  161.38    9.60
  -3   8   2  147.09    8.70
   3   8   2  135.29    8.80
  -3   8  -2  148.49    7.80
   4   8  -2  459.95   21.60
  -4   8   2  440.46   20.50
   4   8   2  471.75   21.40
  -4   8  -2  479.55   19.30
  -5   8   2   35.60    4.80
   5   8  -2   21.90    5.30
   5   8   2   39.00    6.10
  -5   8  -2   38.70    4.30
   6   8  -2   95.19    9.60
  -6   8   2   89.89    7.90
   6   8   2   87.59    9.20
  -6   8  -2   88.19    7.60
   7   8  -2   15.30    6.30
  -7   8   2   20.40    4.90
   7   8   2   26.10    6.00
  -7   8  -2   18.50    4.30
  -8   8   2   20.20    5.50
   8   8  -2   10.20    7.00
   8   8   2   24.80    7.20
  -8   8  -2   11.60    4.50
   0   9   2   83.69    6.00
   0   9  -2   80.69    5.70
   1   9  -2   94.69    6.60
  -1   9   2   86.29    6.20
  -1   9  -2   93.39    5.90
   1   9   2   95.29    6.80
   2   9  -2  476.55   21.00
  -2   9   2  468.15   20.40
  -2   9  -2  486.75   19.80
   2   9   2  466.55   20.90
  -3   9   2    5.90    2.90
   3   9  -2   10.30    3.30
   3   9   2   12.00    3.80
  -3   9  -2   11.90    2.60
  -4   9   2   48.30    6.20
   4   9  -2   51.09    6.90
  -4   9  -2   70.49    5.30
   4   9   2   49.90    6.70
   5   9  -2   21.40    5.10
  -5   9   2   30.50    4.80
   5   9   2   16.90    4.30
  -6   9   2   39.60    5.50
   6   9  -2   40.50    7.20
   6   9   2   49.20    7.10
  -7   9   2   12.00    4.60
   7   9  -2   14.70    5.90
   7   9   2    8.10    5.50
  -7   9  -2    7.50    3.80
  -8   9   2   13.10    8.10
   8   9  -2   10.10    6.80
   8   9   2    4.30    6.30
   0  10   2  292.87   14.30
   0  10  -2  311.07   14.20
  -1  10   2   18.40    3.50
   1  10  -2   21.80    3.60
  -1  10  -2   19.40    3.30
   1  10   2   21.40    4.00
  -2  10   2  183.78   10.60
   2  10  -2  181.68   10.90
   2  10   2  196.18   11.10
  -2  10  -2  215.38   10.30
  -3  10   2   91.49    7.60
   3  10  -2   99.29    8.00
   3  10   2  111.09    7.90
  -3  10  -2   79.49    8.50
   4  10  -2   51.69   10.80
  -4  10   2   42.20    5.70
   4  10   2   49.20    6.40
  -4  10  -2   48.20    5.90
   5  10  -2   12.40    4.70
  -5  10   2   23.90    4.50
   5  10   2   13.40    5.10
  -6  10   2   -2.90    3.30
   6  10  -2    1.80    4.40
  -6  10  -2    3.40    3.60
   6  10   2    9.00    5.00
  -7  10   2   -0.20    4.30
   7  10  -2   -3.00    5.10
  -7  10  -2   -4.90    3.90
   7  10   2   -2.50    5.20
  -8  10   2    9.30    5.60
   8  10  -2   32.40    8.40
   8  10   2   10.70    7.00
   0  11  -2  453.25   19.80
   0  11   2  444.96   20.00
   1  11  -2   49.80    5.70
  -1  11   2   52.99    5.70
  -1  11  -2   66.79    5.60
   1  11   2   62.39    6.10
   2  11  -2  135.09    8.90
  -2  11   2  131.79    8.30
   2  11   2   86.49    7.90
  -2  11  -2   98.19    7.20
   3  11  -2   36.40    5.90
  -3  11   2   34.40    5.00
   3  11   2   40.80    6.60
  -3  11  -2   21.40    3.90
  -4  11   2    1.90    3.40
   4  11  -2    1.30    3.20
   4  11   2   10.80    4.40
  -4  11  -2   12.10    3.40
   5  11  -2   31.60    6.30
  -5  11   2   28.80    5.30
  -5  11  -2   41.00    5.30
   5  11   2   28.10    5.60
   6  11  -2   27.20    6.90
  -6  11   2   37.80    5.80
   6  11   2   34.50    7.20
  -6  11  -2   28.20    4.60
   7  11  -2    9.90    9.60
  -7  11   2    4.30    4.90
   7  11   2    9.00    6.90
   0  12  -2   54.79    5.60
   0  12   2   63.19    6.30
   1  12  -2  162.98    9.60
  -1  12   2  148.09    9.40
   1  12   2  132.59    9.40
  -1  12  -2  138.29    8.80
  -2  12   2   25.50    4.50
   2  12  -2   24.40    4.60
  -2  12  -2   29.90    4.40
   2  12   2   26.60    5.00
  -3  12   2   74.99    7.60
   3  12  -2   84.39    8.10
   3  12   2   76.59    8.20
  -3  12  -2   49.60    6.20
   4  12  -2   37.00    6.00
  -4  12   2   33.70    5.70
   4  12   2   45.30    7.00
  -4  12  -2   37.30    5.10
   5  12  -2   19.40    5.30
  -5  12   2   10.40    4.50
   5  12   2   15.30    5.30
  -5  12  -2   17.90    4.00
   6  12  -2    1.80    5.00
  -6  12   2   -0.90    4.40
   6  12   2   11.90    5.60
  -6  12  -2    0.50    4.00
  -7  12   2   35.50    8.30
   7  12  -2   33.80    8.50
   7  12   2   39.10    8.10
   0  13  -2   13.10    3.70
  -1  13   2  202.38   12.10
   1  13  -2  211.98   13.50
  -1  13  -2  227.38   12.00
   1  13   2  209.28   12.70
   2  13  -2   31.90    5.50
  -2  13   2   24.20    4.80
   2  13   2   28.70    5.20
  -2  13  -2   23.50    4.50
  -3  13   2   33.10    5.70
   3  13  -2   42.90    6.50
   3  13   2   36.10    5.80
  -4  13   2   -2.40    3.90
   4  13  -2    1.60    4.30
  -4  13  -2    5.30    3.90
   4  13   2    6.50    4.50
   5  13  -2   58.29    8.60
  -5  13   2   74.49    9.20
   5  13   2   72.19    9.50
  -5  13  -2   78.99    7.50
  -6  13   2    6.40    5.60
   6  13  -2   -1.60    7.10
   6  13   2   -1.40    5.60
   0  14   2   -5.00    2.80
   1  14  -2  113.59    9.00
  -1  14   2  125.29    9.40
  -1  14  -2  113.59    8.80
   1  14   2  119.59    9.60
   2  14  -2    0.50    3.70
  -2  14   2    1.60    3.80
  -2  14  -2    3.40    3.60
   2  14   2    2.70    3.70
  -3  14   2  144.29   11.80
   3  14  -2  162.18   11.90
   3  14   2  166.58   12.10
  -3  14  -2  135.79   10.60
  -4  14   2    3.30    4.80
   4  14  -2   -3.40    4.50
   4  14   2    8.60    5.20
  -4  14  -2    7.10    4.50
   5  14  -2   12.80    9.10
  -5  14   2    8.20    5.20
  -5  14  -2   -1.20    4.50
   0  15   2   12.10    4.70
   0  15  -2    9.80    4.20
  -1  15   2   93.99    9.00
   1  15  -2   80.69    8.70
  -1  15  -2   90.79    8.80
   1  15   2   84.39    9.00
   2  15  -2   22.80    5.40
  -2  15   2   20.00    5.20
   2  15   2   14.70    5.20
  -2  15  -2   17.30    5.30
  -3  15   2   18.80    5.50
   3  15  -2    8.80    5.10
  -3  15  -2    4.10    4.40
   3  15   2    9.80    5.50
   4  15  -2    1.10    5.70
  -4  15   2   -7.00    4.60
  -4  15  -2    0.10    4.70
   0  16   2   14.80    5.30
   0  16  -2   28.60    5.60
   1  16  -2    9.70    4.90
  -1  16   2    9.20    4.80
  -1  16  -2    7.90    4.30
   1  16   2    9.50    4.90
   2  16  -2    6.30    4.40
  -2  16   2    1.20    4.40
   2  16   2   11.20    5.60
  -2  16  -2   -0.50    4.70
  -3  16   2    1.30    5.10
   3  16  -2    5.60    5.10
   3  16   2    9.10    6.50
  -3  16  -2    2.30    5.20
   0  17  -2   -3.30    4.00
   0  17   2   -6.90    4.20
  -1  17   2    8.50    5.10
   1  17  -2   -7.10    4.30
   1  17   2   -3.50    7.10
  -1  17  -2   -0.40    4.00
   0   0  -3    0.50    0.40
   1   0  -3  112.99    5.20
  -1   0  -3  113.99    4.70
   1   0   3  111.89    4.60
  -1   0   3  117.09    5.30
   2   0   3  136.29    5.90
   2   0   3  131.99    5.80
  -2   0  -3  131.29    5.80
  -2   0   3  130.89    6.50
  -3   0   3  215.08   10.30
   3   0   3  224.68    9.50
  -4   0   3  543.55   23.20
   4   0   3  570.74   22.50
   5   0   3    0.80    2.10
  -5   0   3    4.40    2.60
  -6   0   3  112.39    8.40
   6   0   3  106.49    7.80
   7   0   3   25.20    4.70
   7   0  -3   22.90    5.20
  -7   0   3   23.80    5.00
   8   0  -3   59.69    8.40
  -8   0   3   65.49    8.50
   8   0   3   57.09    7.50
   9   0  -3   -4.50    4.60
  -9   0   3   -2.40    4.10
   9   0   3   -3.60    4.20
  10   0  -3   10.20    7.10
  10   0   3   18.70    5.90
 -10   0   3   21.50    6.80
   0  -1   3   48.30    2.40
   0   1  -3   47.00    2.40
   0   1   3   51.99    2.90
  -1  -1  -3  354.36   14.20
  -1   1   3  347.77   14.50
   1   1  -3  356.76   14.50
   1  -1   3  354.26   13.50
  -1  -1   3  385.16   14.60
   1   1   3  403.56   14.20
  -2   1   3  133.49    6.60
   2  -1   3  137.79    5.70
  -2  -1  -3  140.29    6.40
   2  -1   3  135.09    5.70
   2   1   3  138.39    6.30
  -2  -1   3  140.79    6.80
  -3   1   3  415.66   17.30
   3  -1   3  395.06   16.20
   3  -1   3  417.26   16.30
   3   1   3  420.16   16.70
  -3   1  -3  417.16   16.20
  -3  -1   3  401.96   17.30
  -4   1   3  347.27   15.50
   4  -1   3  343.47   14.50
   4   1   3  340.87   15.00
  -4  -1   3  377.56   18.80
  -4   1  -3  332.47   14.40
  -5   1   3   53.99    5.50
   5  -1   3   60.99    4.80
  -5  -1   3   58.09    5.70
  -5   1  -3   47.30    4.60
   5   1   3   55.39    5.80
  -6   1   3  150.88    9.60
   6  -1   3  141.69    8.80
   6   1  -3  142.29   10.30
   6   1   3  136.69    9.20
  -6  -1   3  133.99    9.50
  -6   1  -3  142.89    8.80
   7  -1   3    3.00    3.20
  -7   1   3    9.50    4.10
   7   1  -3    4.60    4.10
  -7  -1   3    8.60    3.80
   7   1   3    7.00    3.40
  -8   1   3   34.70    6.90
   8   1  -3   36.10    7.00
   8  -1   3   52.99    6.80
  -8  -1   3   49.60    7.30
   8  -1  -3   37.80    7.70
   8   1   3   50.99    6.80
   9   1  -3    2.70    5.10
   9  -1   3    5.00    4.70
  -9   1   3    4.20    4.60
   9   1   3    6.90    4.90
   9  -1  -3   13.90    5.50
  -9  -1   3    8.00    5.30
 -10   1   3   10.70    6.40
  10   1  -3    7.00    6.70
  10  -1   3    0.20    5.10
  10   1   3   23.40    7.10
 -10  -1   3   19.90    6.50
  10  -1  -3   13.90    7.10
   0  -2  -3    4.40    0.90
   0   2  -3    4.70    0.80
   0   2   3    4.70    1.00
   0   2  -3    3.70    0.80
   0  -2   3    4.30    0.90
  -1  -2  -3  370.16   15.00
  -1   2   3  375.06   15.20
   1   2  -3  381.56   15.20
  -1  -2   3  393.96   15.20
   1   2   3  385.66   15.00
  -2   2   3  451.45   16.90
   2  -2   3  435.46   15.50
  -2  -2   3  387.56   16.90
  -2   2  -3  396.06   15.40
   2   2   3  394.36   16.50
  -3   2   3  314.97   14.10
   3  -2   3  314.17   12.90
   3  -2   3  327.67   13.00
  -3   2  -3  338.97   13.00
  -3  -2   3  331.77   14.50
   3   2   3  330.57   14.00
   4  -2   3  228.48    9.30
  -4   2   3  209.08   10.30
   4   2  -3  193.18   10.50
   4   2   3  182.28    9.90
  -4   2  -3  198.78    9.00
  -4  -2   3  191.58   10.40
   5   2  -3  196.48   11.40
   5  -2   3  193.08    9.70
  -5   2   3  194.48   10.60
   5   2   3  195.88   10.40
  -5  -2   3  196.38   11.00
  -5   2  -3  198.88    9.50
   6  -2   3  120.39    7.70
   6   2  -3  121.79    9.40
  -6   2   3  116.89    8.50
  -6   2  -3  111.49    7.20
   6   2   3  111.49    8.20
  -6  -2   3  109.39    8.60
   7   2  -3    5.70    4.50
  -7   2   3   15.70    4.20
   7  -2   3   10.40    3.80
   7   2   3   11.50    3.60
  -7  -2   3   11.80    4.40
  -7   2  -3   12.10    3.50
   8  -2   3   26.50    5.20
   8   2  -3   10.30    5.60
  -8  -2   3   25.10    6.10
   8   2   3   14.00    4.50
   9   2  -3   22.70    6.90
  -9   2   3   11.00    5.70
  -9  -2   3   29.80    6.90
   9  -2  -3    8.60    5.40
   9   2   3   31.70    6.50
  10   2  -3    7.00    6.70
 -10   2   3   -1.30    5.20
  10  -2   3    4.60    5.00
  10   2   3    4.60    5.90
  10  -2  -3    1.20    5.90
   0   3   3  172.58    7.60
   0  -3   3  169.88    7.40
   0   3  -3  181.68    7.40
   0   3  -3  181.48    7.40
  -1   3   3  379.76   15.00
   1   3  -3  371.76   15.10
   1  -3   3  365.46   14.00
  -1   3  -3  370.16   13.90
  -1  -3   3  361.76   15.00
   1   3   3  374.46   14.90
   2  -3   3  310.67   11.60
  -2   3   3  309.97   13.10
   2   3  -3  309.87   13.40
   2   3   3  305.47   13.00
  -2   3  -3  305.37   11.70
   3  -3   3  111.69    4.90
   3   3  -3  103.79    6.50
  -3   3   3  107.19    6.30
   3   3   3  102.09    6.10
  -3  -3   3  101.79    6.50
  -4   3   3    4.00    2.20
   4   3  -3    4.50    2.60
  -4  -3   3   12.30    3.10
  -4   3  -3   11.70    1.80
   5   3  -3  180.58   11.10
   5  -3   3  197.08    9.50
  -5   3   3  187.18   10.70
   5   3   3  192.78   10.50
  -5   3  -3  208.98    9.50
  -5  -3   3  193.88   11.10
   6   3  -3   21.10    4.80
   6  -3   3   25.10    3.90
  -6   3   3   29.40    4.70
  -6   3  -3   19.70    3.30
   6   3   3   21.30    4.30
  -6  -3   3   22.40    4.50
   7  -3   3  145.69    9.40
  -7   3   3  132.39   10.30
   7   3  -3  133.39   14.00
  -7   3  -3  149.99    9.10
  -7  -3   3  163.18   15.30
   7   3   3  144.29   10.20
  -8   3   3   17.60    6.10
   8   3  -3   19.80    5.90
   8  -3   3   16.30    4.70
  -8  -3   3    9.40    4.60
   8   3   3   17.40    5.00
   9   3  -3    9.80    6.10
   9  -3   3    5.70    4.40
  -9   3   3    6.30    4.90
   9   3   3   12.30    5.20
   9  -3  -3   -3.90    4.20
   0   4  -3  373.16   14.80
   0   4   3  376.36   15.00
   0  -4   3  362.76   14.80
   0   4  -3  376.96   14.80
  -1   4   3  524.55   20.10
   1  -4   3  549.35   20.50
   1   4  -3  510.95   20.30
   1   4   3  445.36   19.90
  -2   4   3  147.99    7.60
   2   4  -3  149.29    7.80
   2  -4   3  149.99    6.10
  -2  -4   3  153.68    7.90
  -2   4  -3  157.78    6.30
   2   4   3  154.58    7.70
  -3   4   3  222.88   10.60
   3   4  -3  215.48   12.10
   3  -4   3  232.28    8.90
  -3  -4   3  211.88   11.90
   3   4   3  223.88   10.70
  -3   4  -3  222.98    9.90
  -4   4   3  153.08    8.70
   4  -4   3  138.59    7.70
   4   4  -3  163.98    9.60
  -4   4  -3  164.08    7.30
  -4  -4   3  162.18    9.30
   4   4   3  157.98    8.90
  -5   4   3  202.98   11.20
   5   4  -3  199.58   12.20
  -5   4  -3  217.28    9.80
   5   4   3  209.48   11.40
  -5  -4   3  206.18   11.60
   6   4  -3    5.30    3.70
  -6   4   3    5.50    3.20
   6  -4   3    2.20    2.50
   6   4   3   11.50    3.60
  -6  -4   3    5.30    3.60
  -6   4  -3    4.50    2.50
  -7   4   3   81.69    7.80
   7   4  -3   68.49    9.00
   7  -4   3   70.79    6.70
   7   4   3   79.79    8.20
  -7  -4   3   64.19    8.10
  -7   4  -3   65.49    6.30
   8   4  -3   -8.70    4.60
  -8   4   3    0.00    4.40
   8  -4   3   -2.20    3.30
  -8   4  -3    4.10    3.40
   8   4   3    7.30    4.80
   9  -4   3   29.50    5.90
   9   4  -3   32.40    8.00
  -9   4   3   29.30    6.30
   9   4   3   37.60    7.30
   0   5  -3  313.87   13.00
   0   5   3  319.17   13.30
   1  -5   3  792.62   29.70
   1   5  -3  820.22   30.70
  -1   5   3  828.02   30.50
   1   5   3  726.93   30.40
  -1   5  -3  750.72   29.50
  -2   5   3  375.76   15.70
   2   5  -3  361.46   15.90
   2  -5   3  364.86   14.20
  -2   5  -3  359.16   14.30
   2   5   3  364.36   15.70
   3   5  -3  844.52   33.00
   3  -5   3  814.02   30.40
  -3   5   3  825.72   32.30
  -3   5  -3  787.62   30.50
  -3  -5   3  796.02   32.60
   3   5   3  794.72   32.30
   4   5  -3   54.79    6.00
   4   5   3   56.59    5.50
  -4   5  -3   57.09    3.80
  -4  -5   3   52.29    5.30
  -5   5   3   86.59    7.00
   5   5  -3   88.59    8.00
  -5   5  -3   74.39    5.10
   5   5   3   77.39    6.90
  -5  -5   3   69.79    7.00
   6   5  -3   22.50    5.50
  -6   5   3   18.20    4.50
  -6  -5   3   16.90    4.10
  -6   5  -3   26.10    3.50
   6   5   3   33.40    5.40
  -7   5   3   90.19    8.40
   7   5  -3   85.19   10.00
   7   5   3   84.39   12.60
   8   5  -3    4.00    5.40
   8  -5   3   -4.90    3.30
  -8   5   3    4.50    5.50
   8   5   3    4.70    4.80
  -8   5  -3   -0.80    3.40
   9  -5   3    6.00    4.50
  -9   5   3   13.30    5.40
   9   5  -3   16.90    7.30
   9   5   3   17.60    6.60
   0   6   3 1384.16   52.99
   0   6  -3 1416.26   52.79
   1   6  -3 1302.67   50.39
  -1   6   3 1299.97   50.19
  -1   6  -3 1347.87   49.50
   1   6   3 1338.77   50.49
   2  -6   3   92.99    4.70
  -2   6   3  102.89    6.10
   2   6  -3  102.49    8.60
   2   6   3   84.79    5.80
  -2   6  -3   90.99    4.80
   3  -6   3  211.98    8.80
   3   6  -3  217.58   11.30
  -3   6   3  218.78   10.70
  -3   6  -3  197.28    8.90
   3   6   3  199.18   10.70
  -4   6   3   21.20    3.70
   4   6  -3   14.60    3.60
  -4   6  -3   28.50    3.00
   4   6   3   21.80    3.90
  -5   6   3  277.47   13.90
   5   6  -3  274.97   15.10
   5   6   3  263.57   14.20
  -5   6  -3  269.27   12.00
  -6   6   3   28.60    5.00
  -6   6  -3   42.70    4.60
   6   6   3   35.50    5.60
   7   6  -3   38.70    7.20
  -7   6   3   47.90    6.30
   7   6   3   60.09    7.90
  -8   6   3   10.30    7.80
   8  -6   3    3.90    3.70
   8   6  -3   11.30    6.20
   8   6   3   10.40    4.90
  -8   6  -3    8.80    3.60
   9   6  -3   40.70    9.20
  -9   6   3   42.30    7.20
   9  -6   3   34.50    6.00
   9   6   3   49.10    8.80
   0   7  -3  219.08   10.00
   1   7  -3  474.75   20.10
  -1   7   3  499.15   20.60
   1   7   3  476.75   20.20
  -1   7  -3  477.95   19.20
  -2   7   3  123.99    9.60
   2   7  -3  119.19    7.50
  -2   7  -3  123.49    6.10
   2   7   3  117.69    7.20
  -3   7   3  294.27   15.10
   3   7  -3  313.77   15.60
  -3   7  -3  356.66   13.90
   3   7   3  364.56   16.00
  -4   7   3  173.98   10.40
   4   7  -3  173.38   10.90
  -4   7  -3  205.38    8.80
   4   7   3  188.08   10.60
   5   7  -3  115.59    9.50
  -5   7   3  113.09    8.40
  -5   7  -3  112.19    6.50
   5   7   3  114.69    9.00
  -6   7   3   62.89    6.90
   6   7  -3   42.90    6.90
  -6   7  -3   60.99    5.40
   6   7   3   60.69    8.30
   7   7  -3  105.89   11.10
  -7   7   3   93.39    8.80
  -7   7  -3   92.69    8.80
   7   7   3  112.89   10.30
   8   7  -3   19.50    7.00
   8  -7   3   18.50    4.40
  -8   7  -3   24.40    4.60
   8   7   3   17.60    6.40
  -9   7   3    1.90    5.20
   9   7  -3   -1.40    7.50
   9   7   3   -3.70    6.00
   0   8  -3    0.90    1.60
   0   8   3    1.50    1.90
  -1   8   3  125.79    7.50
   1   8  -3  137.49    7.70
   1   8   3  134.89    7.70
  -1   8  -3  135.19    6.90
  -2   8   3  517.55   22.40
   2   8  -3  506.65   22.70
   2   8   3  537.65   22.80
  -2   8  -3  571.04   21.50
  -3   8   3  174.28   10.20
   3   8  -3  182.08   10.60
  -3   8  -3  183.28    8.60
   3   8   3  177.48   10.10
   4   8  -3   55.99    6.60
  -4   8   3   48.50    6.10
  -4   8  -3   59.59    4.30
   4   8   3   55.79    6.50
  -5   8   3   75.79    7.10
   5   8  -3   74.59   12.40
   5   8   3   79.49    7.90
  -5   8  -3   69.99    5.20
   6   8  -3   88.09    9.70
  -6   8   3   86.19    7.90
  -6   8  -3   90.89    6.40
   6   8   3   86.89    9.30
  -7   8   3    9.70    4.20
   7   8  -3    6.60    5.60
   7   8   3   11.20    5.10
  -7   8  -3   10.40    3.60
   8  -8   3    6.80    4.80
  -8   8   3   14.20    5.40
   8   8  -3    9.50    7.00
  -8   8  -3    9.60    5.40
   8   8   3   18.90    6.50
   0   9   3  627.64   25.70
   0   9  -3  615.14   25.30
  -1   9   3  255.07   12.50
   1   9  -3  244.58   12.50
  -1   9  -3  266.27   11.80
   1   9   3  263.57   12.80
  -2   9   3   20.70    3.70
   2   9  -3   20.10    3.80
   2   9   3   14.20    3.40
  -2   9  -3   19.50    2.90
   3   9  -3    9.80    3.20
  -3   9   3    9.70    3.40
   3   9   3   14.60    3.80
  -3   9  -3   11.60    2.50
   4   9  -3   95.19    8.70
   4   9   3  109.09    8.80
  -4   9  -3  119.29    6.50
  -5   9   3   15.10    3.80
   5   9  -3   14.60    4.50
  -5   9  -3   13.60    2.80
   5   9   3   19.00    5.00
  -6   9   3   10.00    3.80
   6   9  -3    9.90    5.50
   6   9   3   10.00    4.40
  -6   9  -3   15.00    3.30
  -7   9   3    2.80    4.40
   7   9  -3   -1.80    5.00
   7   9   3    2.20    4.90
  -7   9  -3   -2.00    3.70
  -8   9   3   21.00    5.70
   8   9   3   28.40    7.40
   0  10   3    0.10    2.30
   0  10  -3    3.50    2.40
   1  10  -3   34.00    4.70
  -1  10   3   36.90    4.70
  -1  10  -3   37.70    4.30
   1  10   3   38.10    4.60
  -2  10   3   64.09    6.20
   2  10  -3   53.89    5.80
  -2  10  -3   76.49    5.40
   2  10   3   71.29    6.30
   3  10  -3   23.80    4.80
  -3  10   3   14.40    4.00
   3  10   3   25.50    4.80
  -3  10  -3   11.10    2.70
   4  10  -3    3.50    4.00
  -4  10   3   -3.10    3.00
  -4  10  -3   12.20    2.80
   4  10   3    9.70    4.00
   5  10  -3    5.10    4.40
  -5  10   3    1.70    3.70
   5  10   3    5.40    4.00
  -5  10  -3    9.70    2.80
  -6  10   3   28.10    5.30
   6  10  -3   24.90    6.50
   6  10   3   28.70    6.40
  -6  10  -3   28.60    4.00
   7  10  -3   15.30    6.30
  -7  10   3   10.80    6.00
   7  10   3   -0.80    5.40
   8  10  -3    4.70    6.00
  -8  10   3    5.20    5.20
   8  10   3   -0.30    6.20
   0  11  -3   13.40    3.10
   0  11   3   14.60    3.50
   1  11  -3    5.90    2.90
  -1  11   3    2.30    2.80
  -1  11  -3    5.20    2.60
   1  11   3    9.60    3.40
   2  11  -3   35.50    4.90
  -2  11   3   41.50    5.30
  -2  11  -3   46.60    4.90
   2  11   3   32.90    4.80
   3  11  -3   37.80    6.10
  -3  11   3   37.30    5.30
   3  11   3   49.99    6.40
  -3  11  -3   27.90    4.70
   4  11  -3   47.30    6.70
  -4  11   3   46.50    6.40
   4  11   3   62.09    7.70
  -5  11   3   16.00    4.50
   5  11  -3   15.80    5.60
   5  11   3   14.10    5.00
  -5  11  -3   10.80    4.20
  -6  11   3    7.00    4.60
   6  11  -3   18.30    6.10
   6  11   3    7.50    5.40
  -6  11  -3    4.40    5.20
  -7  11   3    5.10    5.20
   7  11   3   15.10    7.50
   0  12  -3   -0.70    2.30
   0  12   3    1.70    2.90
   1  12  -3   40.00    5.40
  -1  12   3   38.80    5.20
   1  12   3   34.10    5.80
  -1  12  -3   37.70    5.00
   2  12  -3    9.00    3.90
  -2  12   3    9.90    3.70
  -2  12  -3   14.00    3.40
   2  12   3   11.80    3.80
  -3  12   3   43.90    6.00
   3  12  -3   54.89    7.10
   3  12   3   49.20    6.70
  -3  12  -3   28.50    4.60
  -4  12   3   -7.80    3.30
   4  12  -3    4.20    3.90
   4  12   3    3.40    4.10
  -4  12  -3    3.10    3.20
  -5  12   3   44.00    6.70
   5  12  -3   51.69    7.80
  -5  12  -3   41.00    5.70
   5  12   3   57.69    7.80
   6  12  -3   27.90    7.40
  -6  12   3   34.40    7.70
   6  12   3   16.10    6.40
   7  12  -3    6.60    6.10
  -7  12   3    5.20    5.50
   7  12   3   17.60    6.80
   0  13  -3   72.79    6.90
   0  13   3   75.39    7.40
   1  13  -3   91.09    7.70
   1  13   3  104.19    8.60
  -1  13  -3   88.89    7.40
   2  13  -3   23.80    5.00
  -2  13   3   25.70    5.40
  -2  13  -3   26.90    4.40
   2  13   3   38.20    5.80
  -3  13   3   93.99    9.60
   3  13  -3   99.29    8.90
   3  13   3   91.49    8.80
  -3  13  -3   68.19    7.40
   4  13  -3   12.70    5.30
   4  13   3    5.60    4.90
  -4  13  -3    5.20    3.90
  -5  13   3   23.60    5.80
   5  13  -3   15.70    5.80
  -5  13  -3   13.70    4.30
   5  13   3   25.90    6.80
   6  13  -3    4.40    6.20
  -6  13   3    6.80    5.20
   6  13   3    5.40    5.30
   0  14  -3   17.90    4.80
   0  14   3   16.70    4.60
  -1  14   3   89.79    8.50
   1  14  -3   78.09    8.00
   1  14   3   89.19    8.70
  -1  14  -3   81.39    7.80
   2  14  -3    6.70    4.20
  -2  14   3    2.80    3.70
   2  14   3    1.80    4.10
  -2  14  -3   -2.20    3.40
   3  14  -3   43.60    6.70
  -3  14   3   37.90    6.40
  -3  14  -3   27.30    5.30
   3  14   3   40.80    6.40
  -4  14   3   26.40    6.20
   4  14  -3   29.70    6.20
  -4  14  -3   28.60    5.30
   4  14   3   22.70    5.90
  -5  14   3   50.09    7.60
   5  14   3   74.09   12.00
   0  15   3   10.80    4.50
   0  15  -3    4.80    3.90
  -1  15   3   20.60    5.00
   1  15  -3   28.80    5.40
   1  15   3   23.70    5.60
  -1  15  -3   24.30    6.00
  -2  15   3   17.20    5.30
   2  15  -3   30.60    6.10
   2  15   3   26.40    6.30
  -2  15  -3   22.70    4.90
  -3  15   3   23.80    5.90
   3  15  -3   34.90    7.00
   3  15   3   36.20    6.50
  -3  15  -3   26.10    5.30
  -4  15   3   18.00    5.90
   4  15  -3   17.40    6.50
  -4  15  -3   12.90    5.30
   4  15   3   15.80    8.80
   0  16  -3    4.60    4.20
   0  16   3   18.40    5.60
  -1  16   3   17.10    5.00
   1  16  -3    6.50    4.60
  -1  16  -3    6.00    4.40
   1  16   3   10.00    5.20
   2  16  -3   17.60    5.30
  -2  16   3   13.10    5.50
  -2  16  -3    6.40    4.80
   2  16   3   21.20    6.10
  -3  16   3   11.00    5.20
   3  16  -3    1.20    4.60
   3  16   3    1.40    4.80
   0  17  -3   -1.80    4.00
   0  17   3    8.80    5.40
   1  17  -3   -0.70    4.50
  -1  17   3    8.80    4.90
   0   0  -4  179.38    7.60
   0   0   4  192.28    8.00
   1   0  -4  193.58    8.40
   1   0   4  196.38    7.80
  -1   0   4  200.98    8.60
  -1   0  -4  201.08    7.90
  -2   0  -4    4.40    1.00
   2   0   4    4.50    1.00
  -2   0   4    4.60    1.60
  -3   0   4    1.30    1.70
   3   0   4    3.00    1.20
   4   0   4  255.57   11.30
  -5   0   4    9.00    3.10
   5   0   4    7.70    2.50
  -6   0   4   59.19    6.50
   6   0   4   54.99    5.60
   7   0   4    9.30    3.60
  -7   0   4    6.80    3.80
   8   0  -4  106.09   10.50
   8   0   4  111.09    9.00
  -8   0   4  108.89   10.70
  -9   0   4   13.30    5.70
   9   0   4    7.20    8.50
   9   0  -4    1.70    5.10
 -10   0   4   13.10    6.30
  10   0   4   12.50    5.50
  10   0  -4   15.30    7.30
   0  -1  -4  377.66   14.90
   0   1   4  391.66   15.00
   0  -1   4  383.76   14.80
  -1  -1  -4   20.20    1.70
  -1   1   4   19.80    2.20
   1   1  -4   21.50    2.00
   1  -1   4   21.10    1.30
  -2   1   4  249.97   11.10
   2  -1   4  259.37    9.70
   2  -1   4  262.47    9.80
  -2  -1  -4  251.27   10.40
  -2  -1   4  255.07   11.10
  -2   1  -4  235.18    9.80
   2   1   4  247.88   10.30
   3  -1   4  115.49    5.60
  -3   1   4  119.49    6.90
   3  -1   4  111.39    5.50
  -3  -1   4  132.59    7.00
   3   1   4  133.69    6.20
   4  -1   4   47.50    3.70
  -4  -1   4   48.10    4.60
   4   1   4   45.00    3.90
   5  -1   4   82.99    5.60
  -5   1   4   86.49    6.80
  -5  -1   4   86.79    6.80
   5   1   4   84.69    5.90
   6  -1   4  169.18   11.30
  -6   1   4  156.28   10.50
  -6  -1   4  181.98   11.00
   6   1   4  172.78   10.00
   7   1  -4   17.70    5.10
  -7   1   4   15.70    4.60
   7  -1   4   11.90    3.90
  -7  -1   4   10.80    4.50
   7   1   4   10.40    3.90
  -8   1   4   34.70    6.40
   8  -1   4   30.10    5.40
   8   1  -4   33.20    6.90
   8   1   4   37.20    5.90
  -8  -1   4   34.10    6.40
   8  -1  -4   42.40    7.40
  -9   1   4    3.70    4.60
   9   1  -4    2.10    5.50
   9  -1   4    3.30    4.30
   9   1   4   15.40    5.10
  -9  -1   4    0.30    5.00
   9  -1  -4   -0.90    4.70
 -10   1   4   28.60    7.20
  10  -1   4   13.80    5.50
  10   1  -4   17.30    7.50
  10  -1  -4   12.70    6.70
 -10  -1   4    9.10    6.70
  10   1   4   13.20    6.30
   0  -2  -4   53.99    3.30
   0   2   4   51.59    3.10
   0  -2   4   52.39    3.10
  -1   2   4    5.10    1.40
   1   2   4    7.70    1.30
  -1  -2   4    6.90    1.50
  -2   2   4   19.50    2.50
   2   2   4   12.50    1.80
  -2  -2   4   10.60    2.10
  -3   2   4  129.69    7.40
   3   2   4  138.59    6.90
  -3  -2   4  144.29    7.70
   4  -2   4  198.58    8.60
  -4  -2   4  184.58   10.20
   4   2   4  185.08    9.30
  -5   2   4   46.80    5.50
   5   2  -4   54.19    6.00
   5  -2   4   53.29    4.40
   5   2   4   71.39    5.60
  -5  -2   4   67.29    6.30
  -6   2   4  108.19    8.10
   6   2  -4   91.39    8.60
   6  -2   4   94.49    6.70
   6   2   4  102.79    7.70
  -6  -2   4  100.49    8.40
  -7   2   4   66.79    8.00
   7  -2   4   62.09    6.30
   7   2  -4   50.49    7.60
   7   2   4   77.39    6.70
  -7  -2   4   79.39    8.40
   8   2  -4   28.50    6.90
   8  -2   4   21.90    4.90
  -8   2   4   28.90    6.20
  -8  -2   4   28.70    6.10
   8   2   4   27.70    5.40
  -9   2   4    4.80    5.00
   9  -2   4    2.00    4.20
   9   2  -4   -3.40    5.20
  -9  -2   4    4.00    5.40
   9  -2  -4    7.80    5.00
   9   2   4    1.80    4.70
   0  -3   4 1190.78   44.00
   0   3  -4 1158.38   43.90
   0   3   4 1181.98   44.30
   0   3  -4 1183.78   44.00
   1   3  -4   19.80    2.40
  -1   3   4   22.40    2.60
  -1   3  -4   25.60    1.40
  -1   3  -4   24.90    1.40
  -1  -3   4   28.60    2.60
   1   3   4   24.80    2.30
  -2   3   4  186.58    9.40
   2   3   4  216.98    9.30
  -2  -3   4  211.38    9.70
   3  -3   4    4.40    0.80
  -3   3   4    4.70    2.10
   3   3  -4    2.90    2.30
   3  -3   4    5.00    0.90
   3   3   4    6.40    2.00
  -3   3  -4    7.90    1.00
  -3  -3   4    6.40    2.20
   4   3  -4  106.59    7.80
   4  -3   4  118.39    5.80
   4  -3   4  104.09    5.50
  -4   3  -4  134.19    5.80
  -4  -3   4  136.29    8.10
  -5   3   4  115.19    8.00
   5   3  -4  108.79    8.80
   5  -3   4  120.29    6.60
  -5   3  -4  128.99    6.50
   5   3   4  123.79    7.80
  -5  -3   4  124.39    8.70
  -6   3   4   52.89    6.10
   6   3  -4   42.50    6.30
   6  -3   4   45.80    4.50
  -6  -3   4   39.30    5.70
   6   3   4   30.40    4.70
  -6   3  -4   26.00    3.60
   7   3  -4   26.60    6.70
   7  -3   4   34.20    4.70
  -7   3   4   32.60    5.40
   7   3   4   30.80    5.30
  -7  -3   4   32.40    6.60
   8   3  -4   37.60    7.10
   8  -3   4   26.30    4.80
  -8   3   4   24.90    5.80
   8   3   4   35.50    7.40
  -8  -3   4   35.70    6.80
   9   3  -4   23.60    7.30
   9  -3   4   19.10    5.20
  -9   3   4   27.50    6.60
  -9  -3   4   39.50    7.60
   9   3   4   14.90    5.90
   0   4  -4   28.20    2.40
   0   4  -4   32.20    2.50
   0   4   4   28.30    2.50
  -1   4   4   45.30    3.90
   1   4   4   64.39    4.10
  -1   4  -4   66.49    3.00
  -1  -4   4   63.79    4.30
  -1   4  -4   69.89    3.40
   2   4  -4  449.16   20.00
  -2   4   4  468.15   19.90
   2  -4   4  452.75   17.90
   2   4   4  531.45   19.90
  -2  -4   4  515.35   20.10
  -3   4   4  303.17   14.40
   3   4  -4  290.77   16.70
   3  -4   4  302.87   12.20
   3   4   4  336.67   14.40
  -3   4  -4  338.77   12.40
  -3  -4   4  372.76   18.70
   4  -4   4   16.60    1.80
   4   4  -4   15.80    3.50
  -4   4   4   20.00    3.40
  -4   4  -4   14.00    1.80
  -4  -4   4   17.20    3.70
   4   4   4   12.40    2.90
  -5   4   4  106.69    7.50
   5  -4   4  103.99    5.60
   5   4  -4   92.69    7.80
   5   4   4   83.49    6.80
  -5   4  -4   85.29    5.20
  -5  -4   4   74.99    7.20
  -6   4   4   56.29    6.80
   6  -4   4   65.19    5.50
   6   4  -4   78.69    8.50
  -6  -4   4   82.89    8.00
  -6   4  -4   71.79    5.20
   6   4   4   72.09    6.80
   7  -4   4   35.20    6.60
   7   4  -4   43.80    7.50
  -7   4   4   39.20    6.00
   7   4   4   35.60    5.70
  -7   4  -4   37.70    6.50
  -7  -4   4   29.20    5.80
   8   4  -4   -3.80    4.60
  -8   4   4    4.40    4.40
   8  -4   4    0.30    3.30
   8   4   4    3.20    4.10
  -8  -4   4    0.40    4.90
  -9   4   4   11.20    5.60
   9   4  -4    8.70    6.80
   9  -4   4    7.50    4.20
   9   4   4   14.40    5.80
   0   5  -4   73.09    4.10
   0   5   4   63.89    4.30
   1  -5   4  414.66   17.00
   1   5  -4  417.66   18.00
  -1   5   4  437.96   18.00
  -1   5  -4  440.46   17.00
   1   5   4  455.55   18.10
  -1   5  -4  457.05   16.90
   2   5  -4  253.77   12.00
  -2   5   4  244.88   11.70
  -2   5  -4  239.98   10.00
   2   5   4  269.87   11.70
  -2  -5   4  253.37   11.90
   3   5  -4  414.26   17.60
  -3   5   4  398.76   16.90
   3  -5   4  428.46   15.30
   3   5   4  354.76   16.50
  -3   5  -4  326.17   14.60
  -3  -5   4  355.46   16.80
   4  -5   4  136.59    6.20
  -4   5   4  139.79    8.60
   4   5  -4  146.19    9.40
  -4  -5   4  144.29    9.10
  -4   5  -4  151.88    6.60
   4   5   4  148.99    8.70
   5   5  -4  179.78   11.50
  -5   5   4  187.78   10.50
   5   5   4  174.78   10.40
  -5  -5   4  172.68   10.90
  -5   5  -4  169.48    8.30
   6   5  -4   20.70    5.20
  -6   5   4   20.30    4.20
   6  -5   4   16.70    3.10
   6   5   4   18.00    4.20
  -6  -5   4   15.60    4.70
  -6   5  -4   19.10    2.80
   7   5  -4    0.30    4.90
  -7   5   4    6.20    3.90
   7  -5   4    1.80    2.70
  -7  -5   4    7.70    4.50
  -7   5  -4    2.20    2.70
   7   5   4    7.30    7.10
   8   5  -4   -2.80    5.20
   8  -5   4    3.70    3.60
  -8   5   4    3.60    4.50
   8   5   4    9.00    4.80
   9  -5   4    7.90    4.50
   9   5  -4    5.30    6.70
  -9   5   4   18.80    5.80
   9   5   4   12.30    6.00
   0   6  -4  626.54   24.50
   0   6   4  622.14   24.90
  -1   6   4  712.53   26.30
   1   6  -4  697.83   26.40
  -1   6  -4  609.04   25.00
   1   6   4  593.84   28.60
  -2   6   4  161.38    8.10
   2  -6   4  147.19    6.30
   2   6   4  126.89    7.60
  -2   6  -4  133.69    6.30
  -3   6   4  125.59    8.00
   3   6  -4  130.99    8.30
   3  -6   4  123.79    5.60
   3   6   4  133.69    7.70
  -3   6  -4  128.69    5.80
   4  -6   4   28.30    2.40
  -4   6   4   36.20    4.80
   4   6  -4   35.20    5.20
   4   6   4   42.50    5.10
  -4   6  -4   38.90    2.90
   5   6  -4   77.19    8.20
  -5   6   4   87.89    7.30
   5   6   4   73.99    7.00
  -5   6  -4   73.09    4.70
   6   6  -4   20.60    6.90
  -6   6   4   18.40    4.30
   6   6   4   21.20    4.70
  -6   6  -4   20.80    3.00
   7   6  -4   92.19   10.40
   7  -6   4   90.29    6.70
  -7   6   4   98.69    8.80
  -7   6  -4   89.19    6.50
   7   6   4   90.49    9.20
  -8   6   4   10.30    5.20
   8   6  -4    2.30    6.20
   8  -6   4    3.40    4.40
   8   6   4    6.00    5.10
  -9   6   4   14.10    5.50
   9   6  -4    6.10    9.50
   9   6   4    2.80    5.50
   0   7  -4  148.89    7.50
   0   7   4  150.98    7.90
  -1   7   4   95.19    6.10
   1   7  -4  101.69    6.30
  -1   7  -4  108.69    5.50
   1   7   4  100.29    6.20
  -2   7   4  347.97   15.80
   2   7  -4  332.97   15.90
  -2   7  -4  363.06   14.30
   2   7   4  359.86   16.00
   3  -7   4   90.89    5.10
   3   7  -4   99.09    7.50
  -3   7   4  103.69    7.30
   3   7   4   98.59    6.90
  -3   7  -4  108.19    5.20
   4  -7   4  112.69    6.40
   4   7  -4  120.09    8.70
  -4   7   4  113.89    8.20
  -4   7  -4  111.29    5.60
   4   7   4  104.89    7.70
   5   7  -4   93.79    8.40
  -5   7   4   91.09    7.70
   5   7   4  106.49    8.40
  -5   7  -4   96.89    5.50
  -6   7   4   69.69    7.00
   6   7  -4   54.99    7.70
   6   7   4   64.29    7.60
  -6   7  -4   64.49    5.00
   7   7  -4   16.90    5.40
  -7   7   4   11.00    4.30
   7  -7   4    7.40    3.00
  -7   7  -4   12.60    3.00
   7   7   4   11.60    5.20
  -8   7   4   28.10    5.80
   8   7  -4   32.90    8.60
   8   7   4   38.90    7.40
  -9   7   4   28.90    6.80
   9   7  -4   36.60    9.80
   9   7   4   32.80    7.80
   0   8  -4  290.77   12.80
   0   8   4  279.77   13.20
  -1   8   4   24.70    3.50
   1   8  -4   33.10    4.00
   1   8   4   29.00    3.80
  -1   8  -4   31.90    3.10
  -2   8   4   44.90    5.00
   2   8  -4   55.69    5.30
   2   8   4   43.90    5.10
  -2   8  -4   45.90    3.80
  -3   8   4   57.29    6.00
   3   8  -4   66.89    6.40
  -3   8  -4   70.29    4.30
   3   8   4   60.19    5.80
  -4   8   4  209.98   12.40
   4   8  -4  227.68   13.20
   4   8   4  230.08   12.70
  -4   8  -4  238.08   10.00
  -5   8   4   49.50    6.30
  -5   8  -4   41.10    3.80
   5   8   4   34.00    6.30
   6   8  -4   46.40    7.70
  -6   8   4   34.90    5.50
  -6   8  -4   46.70    4.80
   6   8   4   44.50    6.60
   7   8  -4   25.10    6.50
   7  -8   4   24.00    3.90
  -7   8   4   33.20    6.00
  -7   8  -4   31.90    3.90
   7   8   4   35.30    6.60
  -8   8   4   23.10    5.50
   8   8  -4    5.10    5.90
   8   8   4   12.80    6.00
   0   9  -4    5.30    2.30
   0   9   4    6.00    2.60
   1   9  -4   28.10    4.00
  -1   9   4   36.70    4.50
   1   9   4   20.40    3.60
  -1   9  -4   28.00    3.40
   2   9  -4  155.68    9.70
  -2   9   4  169.68    9.60
  -2   9  -4  172.48    8.40
   2   9   4  163.88    9.70
   3   9  -4   33.20    5.00
  -3   9   4   27.50    4.50
   3   9   4   21.90    3.90
  -3   9  -4   26.70    3.30
   4   9  -4    3.60    3.40
  -4   9   4   -3.40    2.90
   4   9   4    2.30    3.40
  -4   9  -4    6.20    2.00
  -5   9   4   21.10    4.40
   5   9  -4   15.00    4.90
   5   9   4   20.30    4.70
  -5   9  -4   28.90    3.80
   6   9  -4   73.79    9.30
  -6   9   4   70.89    7.90
  -6   9  -4   51.99    5.30
   6   9   4   69.59    8.60
   7   9  -4    0.10    4.80
  -7   9   4    0.00    6.50
   7   9   4    6.80    5.60
  -8   9   4    7.20    4.90
   8   9   4    3.60    5.80
   0  10  -4  110.19    7.10
   0  10   4  112.59    7.50
  -1  10   4   -1.20    2.20
   1  10  -4    0.30    2.40
  -1  10  -4    2.00    2.10
   1  10   4    1.60    2.50
   2  10  -4   -1.00    2.20
  -2  10   4    1.30    2.50
   2  10   4    0.80    2.70
  -2  10  -4   -2.00    2.00
   3  10  -4   19.20    4.40
  -3  10   4   11.70    3.80
  -3  10  -4   13.70    2.70
   3  10   4   11.80    3.70
  -4  10   4   65.69    7.50
   4  10  -4   86.39    8.50
  -4  10  -4   66.99    5.00
   4  10   4   75.69    8.00
  -5  10   4    8.40    4.30
   5  10  -4   24.80    5.90
  -5  10  -4   17.20    3.00
   5  10   4   10.40    4.30
   6  10  -4    7.90    5.10
  -6  10   4   -0.60    3.80
   6  10   4    1.70    4.40
  -6  10  -4   -4.10    2.60
  -7  10   4   -1.30    4.50
   7  10  -4    3.40    5.50
   7  10   4    4.50    5.50
   8  10  -4   32.80    8.50
  -8  10   4   10.30    5.80
   8  10   4   13.00    6.90
   0  11   4   98.49    7.50
   0  11  -4   95.89    7.00
  -1  11   4   14.30    3.50
   1  11  -4   14.70    3.60
   1  11   4   18.60    4.10
  -1  11  -4   15.40    3.00
  -2  11   4  135.19    8.80
   2  11  -4  126.29    8.70
   2  11   4  108.99    8.60
  -2  11  -4   94.39    7.00
   3  11  -4   19.70    4.90
  -3  11   4   17.60    4.30
  -3  11  -4   11.50    3.00
   3  11   4   20.70    4.50
  -4  11   4    0.90    3.70
   4  11  -4   14.30    4.80
  -4  11  -4    8.80    2.90
   4  11   4    9.90    4.40
   5  11  -4   17.90    5.30
  -5  11   4   10.00    4.70
   5  11   4   24.50    5.60
  -5  11  -4   18.90    3.20
   6  11  -4   30.50    6.70
  -6  11   4   29.40    7.10
   6  11   4   26.20    6.70
   7  11   4   20.60   10.30
   0  12   4   70.79    6.80
   0  12  -4   62.89    5.90
  -1  12   4   84.49    7.40
   1  12  -4   94.39    7.40
  -1  12  -4   90.89    6.90
   1  12   4   95.79   11.70
   2  12  -4    5.90    3.40
  -2  12   4    6.60    3.60
  -2  12  -4   10.70    3.20
   2  12   4    9.50    3.40
   3  12  -4   47.10    6.30
  -3  12   4   45.90    6.00
   3  12   4   44.30    6.30
  -3  12  -4   28.90    4.40
   4  12  -4   30.00    6.10
  -4  12   4   13.60    4.80
   4  12   4   17.30    5.30
   5  12  -4   16.20    5.90
  -5  12   4   10.20    6.60
  -5  12  -4   15.00    3.50
   5  12   4   16.70    5.70
  -6  12   4   16.10    5.30
   6  12  -4    7.60    5.70
   6  12   4    9.70    5.70
   7  12  -4   39.50    8.90
  -7  12   4   26.20    6.70
   7  12   4   28.50    7.50
   0  13  -4   83.69    6.90
   0  13   4   70.99    7.60
   1  13  -4  211.58   12.00
  -1  13   4  204.08   12.30
  -1  13  -4  201.28   11.50
   1  13   4  204.08   12.60
   2  13  -4   61.89    7.20
  -2  13   4   43.50    6.40
  -2  13  -4   53.19    6.30
   2  13   4   51.19    7.00
  -3  13   4   12.30    4.80
   3  13  -4   20.20    5.40
   3  13   4   20.30    5.10
   4  13  -4   19.90    5.70
   4  13   4   24.00    6.20
  -4  13  -4   28.50    4.50
  -5  13   4   32.70    6.80
   5  13  -4   36.60    7.00
   5  13   4   64.69    8.90
   6  13  -4    0.90    5.60
  -6  13   4    6.50    5.50
   6  13   4    3.50    5.80
   0  14  -4   -3.10    3.00
   0  14   4   -0.90    3.50
   1  14  -4   82.59    7.60
  -1  14   4   86.39    8.40
  -1  14  -4   78.09    7.50
   1  14   4   60.89    7.80
  -2  14   4   69.59    8.10
   2  14  -4   76.79    8.00
  -2  14  -4   75.69    7.40
   2  14   4   85.39    9.30
   3  14  -4  176.88   12.60
  -3  14   4  173.28   12.70
   3  14   4  182.88   13.00
   4  14  -4    7.90    5.40
  -4  14   4   12.30    5.30
   4  14   4   10.70    5.60
  -4  14  -4   11.60    4.40
  -5  14   4   -5.70    5.00
   5  14   4   10.00    6.50
   0  15   4   42.80    6.40
   0  15  -4   45.70    6.30
   1  15  -4   35.40    5.80
  -1  15   4   34.90    5.90
  -1  15  -4   44.50    6.80
   1  15   4   35.00    6.40
   2  15  -4   17.60    5.20
  -2  15   4    7.40    4.40
  -2  15  -4    4.50    4.00
   2  15   4    8.50    5.00
   3  15  -4   10.20    5.50
  -3  15   4   11.60    4.80
   3  15   4    7.60    5.20
  -3  15  -4    0.50    4.00
  -4  15   4   11.50    5.90
   4  15  -4   30.80    7.60
  -4  15  -4   11.40    8.80
   4  15   4   20.50    6.50
   0  16  -4   27.20    5.40
   0  16   4   41.10    6.90
   1  16  -4    3.50    4.10
  -1  16   4    5.20    4.40
  -1  16  -4   -3.90    4.10
   1  16   4    8.60    5.10
  -2  16   4    7.80    5.20
   2  16  -4    2.20    4.60
  -2  16  -4    1.80    5.40
   2  16   4    1.30    5.90
  -3  16   4   13.60    5.80
   3  16  -4    4.20    5.20
  -3  16  -4   -2.70    4.90
   3  16   4    6.60    5.70
   0  17  -4   -9.80    3.90
   0   0   5    0.30    0.90
   0   0  -5    2.60    0.90
  -1   0   5  144.39    6.80
   1   0   5  150.38    6.20
  -1   0  -5  145.09    6.10
   2   0   5 1478.55   54.49
  -2   0   5 1474.25   55.79
  -2   0  -5 1470.45   54.69
   3   0   5  337.17   13.80
  -3   0   5  349.47   15.20
  -4   0   5    7.00    2.40
   4   0   5    7.60    1.90
  -5   0   5   10.60    3.20
   5   0   5    8.60    2.30
   6   0   5  257.37   12.50
  -6   0   5  255.07   14.00
  -7   0   5   28.80    5.30
   7   0   5   19.60    4.10
   8   0  -5   20.70    5.90
  -8   0   5   26.60    5.90
   8   0   5   23.00    4.80
  -9   0   5   -2.30    4.70
   9   0  -5   -4.10    4.80
   9   0   5    0.90    4.00
   0  -1   5 1363.86   49.00
   0   1  -5 1313.87   48.90
   0  -1  -5 1263.67   49.10
   0   1   5 1330.07   49.20
  -1  -1  -5  350.76   14.80
  -1   1   5  376.66   15.50
   1  -1   5  374.56   14.40
  -1   1  -5  389.66   14.40
   1   1   5  388.36   14.80
  -1  -1   5  397.36   15.50
  -2   1   5  111.69    6.10
   2  -1   5  107.49    4.60
  -2  -1   5  111.69    6.20
   2   1   5  110.59    5.20
  -2   1  -5  108.69    4.70
   3  -1   5  142.29    6.20
   3  -1   5  145.09    6.30
  -3   1   5  154.78    8.00
   3   1   5  132.79    6.70
  -3  -1   5  130.09    7.60
  -4   1   5  373.66   17.10
   4  -1   5  368.16   15.30
   4   1   5  377.56   15.90
  -4  -1   5  399.26   17.40
   5  -1   5   78.99    5.30
  -5   1   5   89.29    7.00
   5   1   5   83.19    5.80
  -5  -1   5   88.29    7.20
  -6   1   5   56.99    6.40
   6  -1   5   56.69    5.20
  -6  -1   5   59.89    6.90
   6   1   5   49.80    5.40
  -7   1   5    7.50    4.10
   7  -1   5    7.70    3.30
   7   1  -5   -1.80    4.10
  -7  -1   5    7.20    4.30
   7   1   5    4.80    3.40
  -8   1   5   77.79    9.40
   8  -1   5   85.89    8.00
   8   1  -5   85.09   10.20
  -8  -1   5   96.89   10.10
   8   1   5   95.19    8.70
   9   1  -5    8.30    5.90
   9  -1   5   -4.80    3.70
  -9   1   5    5.10    5.30
  -9  -1   5    9.90    5.70
   9   1   5   -2.90    4.20
   9  -1  -5   -1.90    5.00
   0   2   5  352.46   13.90
   0   2  -5  340.97   13.40
   0  -2   5  333.07   13.50
  -1   2   5  381.96   15.30
   1  -2   5  374.46   13.90
  -1   2  -5  352.86   13.80
  -1  -2   5  354.76   15.00
   1   2   5  375.86   14.70
  -2   2   5  129.59    6.70
  -2  -2   5  118.99    6.50
   2   2   5  116.29    5.90
  -3   2   5   66.79    4.90
   3  -2   5   70.19    3.20
   3  -2   5   68.89    3.30
  -3  -2   5   60.29    5.00
   3   2   5   58.69    4.20
   4  -2   5  171.58    7.60
   4  -2   5  170.98    7.60
  -4   2   5  174.08    9.60
   4   2   5  163.18    8.60
  -4  -2   5  175.78    9.70
   5  -2   5   77.39    4.90
  -5   2   5   80.09    6.90
  -5  -2   5   74.59    7.00
   5   2   5   78.19    5.90
  -6   2   5  105.39    8.40
   6   2  -5  108.29    9.50
   6  -2   5  108.39    6.90
  -6  -2   5  121.49    9.20
   6   2   5  127.89    8.00
   7  -2   5    0.70    2.90
  -7   2   5    2.90    3.80
   7   2  -5   -2.80    6.50
   7   2   5   -0.80    2.50
  -8   2   5   35.70    6.30
   8   2  -5   32.20    6.90
   8  -2   5   22.40    4.70
   8   2   5   30.40    5.60
  -8  -2   5   20.50    5.60
  -9   2   5   12.90    5.70
   9   2  -5    6.60    6.30
   9  -2   5    1.60    3.80
   9   2   5    4.30    4.80
   9  -2  -5    7.40    5.00
  -9  -2   5    6.00    5.70
   0   3  -5  256.37   10.70
   0   3   5  263.27   11.10
   0  -3   5  266.67   10.80
   0   3  -5  262.77   10.70
  -1  -3   5  199.88    9.00
  -1   3  -5  198.48    7.70
  -1   3  -5  196.28    7.70
   1   3   5  197.38    8.70
  -2   3   5  461.75   19.70
   2   3   5  484.05   19.20
  -2  -3   5  487.35   19.80
  -3   3   5   42.20    3.90
   3   3   5   28.80    3.30
  -3  -3   5   27.20    4.00
   4  -3   5   59.69    3.30
   4   3  -5   63.79    5.80
   4  -3   5   52.99    3.10
  -4   3   5   61.09    5.40
  -4  -3   5   63.79    5.90
  -5   3   5   27.70    4.40
   5   3  -5   20.40    4.60
   5  -3   5   23.50    3.00
  -5  -3   5   26.80    4.30
   5   3   5   29.00    4.00
  -6   3   5   33.20    5.20
   6   3  -5   28.30    5.90
   6  -3   5   35.20    4.20
   6   3   5   40.70    5.10
  -6  -3   5   41.20    6.10
   7   3  -5   75.59    9.60
   7  -3   5   73.69    7.60
  -7   3   5   78.99    8.60
  -7  -3   5   78.49    8.10
   7   3   5   79.29    7.50
   8   3  -5   17.20    6.50
  -8   3   5   24.00    5.60
   8  -3   5   19.90    4.30
  -8  -3   5   14.90    5.50
   8   3   5   24.60    8.30
   9  -3   5   -0.50    3.30
   9   3  -5    5.90    6.30
  -9   3   5    8.40    5.20
   9   3   5   10.40    5.30
  -9  -3   5    5.50    5.20
   0   4   5  223.68    9.90
   0   4  -5  226.38    9.50
   0  -4   5  225.48    9.50
   0   4  -5  213.18    9.30
  -1   4   5  134.19    7.70
   1   4  -5  131.89    7.60
   1   4   5  172.08    7.70
  -1  -4   5  166.78    7.90
  -1   4  -5  172.38    6.60
  -1   4  -5  180.88    6.90
  -2   4   5  244.28   11.40
   2   4  -5  235.98   11.50
   2   4   5  251.77   11.10
  -2  -4   5  247.58   11.50
   3   4  -5   27.50    4.00
  -3   4   5   28.00    3.80
  -3  -4   5   21.00    3.40
   3   4   5   17.90    3.20
   4   4  -5  122.79    8.80
   4  -4   5  134.09    6.30
  -4   4   5  130.49    8.30
  -4  -4   5  142.59    8.70
   4   4   5  153.18    8.20
   5  -4   5   79.99    4.60
   5   4  -5   78.29    7.90
  -5   4   5   71.79    6.90
   5   4   5   90.69    6.70
  -5  -4   5   89.09    7.50
   6  -4   5   16.70    2.80
   6   4  -5   17.90    5.50
  -6   4   5   13.20    3.70
  -6  -4   5   15.50    4.60
   6   4   5   14.60    3.80
  -7   4   5   24.20    5.20
   7   4  -5   21.50    6.40
   7  -4   5   22.50    3.70
   7   4   5   22.10    4.80
  -7  -4   5   13.90    5.10
  -8   4   5   16.10    4.90
   8   4  -5    1.10    5.30
   8  -4   5    0.80    3.20
   8   4   5   10.30    4.60
  -8  -4   5   11.50    5.50
   9   4  -5    8.40    6.90
   9  -4   5   17.80    4.70
  -9   4   5   14.60    5.80
  -9  -4   5   15.50    6.00
   9   4   5   12.70    5.60
   0   5  -5   42.10    3.20
   0   5   5   39.00    3.50
  -1   5   5  466.35   18.00
   1   5  -5  464.05   18.00
   1   5   5  418.76   17.70
  -1   5  -5  405.96   16.50
  -1   5  -5  401.56   16.60
  -1  -5   5  417.16   17.70
   2   5  -5  114.39    6.90
  -2   5   5  106.69    6.70
   2  -5   5  104.09    4.60
  -2  -5   5  107.09    6.70
  -2   5  -5  112.19    4.60
  -2   5  -5  112.59    4.60
   2   5   5  116.49    9.10
  -3   5   5  156.48    8.80
   3   5  -5  138.29    8.90
   3   5   5  160.48    8.50
  -3  -5   5  151.88    8.70
  -4   5   5   71.69    6.20
   4  -5   5   70.59    3.40
   4   5  -5   82.89    7.10
   4   5   5   74.79    6.10
  -4  -5   5   68.29    6.20
  -5   5   5   19.30    4.20
   5  -5   5   13.70    1.70
   5   5  -5    9.20    3.80
   5  -5   5   18.10    2.10
   5   5   5   13.20    3.50
  -5  -5   5   13.00    4.20
   6  -5   5   29.50    3.60
   6   5  -5   36.60    7.00
  -6   5   5   32.20    5.20
   6   5   5   39.90    5.50
  -6  -5   5   34.50    6.20
  -7   5   5   24.10    5.10
   7  -5   5   19.60    3.30
   7   5  -5   19.40    5.80
   7   5   5   12.20    8.20
  -7  -5   5   21.70    5.80
  -8   5   5    7.90    4.60
   8   5  -5    1.80    5.40
  -8  -5   5    5.80    5.60
   8   5   5    8.60    4.70
   9   5  -5   -0.20    6.90
  -9   5   5    6.70    5.40
   9   5   5   -2.90    4.70
   0   6  -5  282.77   12.10
   1   6  -5   84.49    5.70
   1   6   5   93.29    5.80
  -1   6  -5   92.69    4.60
  -2   6   5  438.96   17.90
   2   6  -5  412.26   19.00
   2  -6   5  412.86   15.60
  -2   6  -5  374.96   16.10
  -2   6  -5  375.26   15.40
   2   6   5  397.56   17.40
  -3   6   5  137.09    8.20
   3  -6   5  126.79    5.40
   3   6  -5  138.39    8.60
   3   6   5  121.79    7.70
  -3  -6   5  124.59    8.20
  -3   6  -5  125.09    5.30
   4  -6   5   36.50    2.80
   4   6  -5   27.20    4.40
  -4   6   5   34.60    4.80
   4   6   5   33.30    4.70
  -4  -6   5   42.20    5.50
   5  -6   5   73.69    4.00
   5  -6   5   56.59    3.30
   5   6  -5   58.29    7.10
  -5   6   5   67.49    7.10
  -5   6  -5   56.79    4.00
  -5  -6   5   63.49    7.40
   5   6   5   58.89    6.40
   6   6  -5   25.50    5.90
   6  -6   5   28.90    3.40
  -6   6   5   39.60    5.70
  -6  -6   5   33.00    6.00
   6   6   5   24.00    4.80
   7   6  -5   11.70    5.90
   7  -6   5   10.60    2.60
  -7   6   5    9.70    4.20
   7   6   5   14.90    4.60
   8  -6   5   19.90    4.10
  -8   6   5   36.30    6.50
   8   6  -5   24.10    7.30
   8   6   5   38.20    6.80
  -9   6   5   22.80    6.60
   9   6   5   13.40    6.30
   0   7  -5  364.06   15.30
   0   7   5  358.16   15.70
  -1   7   5  188.58    9.80
   1   7  -5  199.78   10.00
  -1   7  -5  206.78    8.80
   1   7   5  199.28   10.00
  -2   7   5   65.29    5.40
   2  -7   5   55.09    3.70
   2   7  -5   64.29    5.50
   2   7   5   57.59    5.30
  -2   7  -5   55.99    3.50
  -3   7   5   99.59    7.30
   3   7  -5   93.39    7.50
   3  -7   5   90.49    4.50
   3   7   5   97.09    7.00
  -3   7  -5  101.29    5.20
   4   7  -5  249.38   13.60
  -4   7   5  235.98   12.80
   4   7   5  227.58   12.50
   5  -7   5   19.40    2.30
   5   7  -5   21.20    4.90
  -5   7   5   31.30    5.00
   5   7   5   31.90    5.00
  -5   7  -5   34.20    4.00
   6  -7   5   54.99    4.00
  -6   7   5   62.29    7.20
   6   7  -5   45.20    7.60
  -6   7  -5   51.29    3.80
   6   7   5   45.50    6.40
   7   7  -5   28.00    6.90
   7  -7   5   28.90    3.50
  -7   7   5   34.00    7.70
   7   7   5   33.30    5.80
  -8   7   5   16.90    5.50
   8   7  -5   18.10    7.00
   8   7   5   18.50    5.70
   9   7  -5    3.30    7.20
  -9   7   5   11.40    5.80
   9   7   5    6.10    5.60
   0   8   5    1.20    1.80
   0   8  -5    0.50    1.80
  -1   8   5  143.69    8.30
   1   8  -5  147.59    8.30
   1   8   5  140.09    8.40
  -1   8  -5  148.59    7.20
  -2   8   5  317.67   15.30
   2   8  -5  312.97   15.30
   2   8   5  326.27   15.30
  -2   8  -5  331.17   13.50
  -3   8   5  115.39    8.20
   3   8  -5  116.69    8.50
   3  -8   5  107.59    7.20
  -3   8  -5  130.39    6.00
   3   8   5  122.69    8.10
   4   8  -5   68.19    7.50
   4  -8   5   60.99    3.60
  -4   8   5   66.49    7.10
  -4   8  -5   68.89    3.90
   4   8   5   76.29    7.00
  -5   8   5   42.50    5.90
   5   8  -5   51.09    8.20
  -5   8  -5   53.69    4.30
  -6   8   5   45.70    6.20
   6   8  -5   59.19    8.20
  -6   8  -5   44.90    4.20
   6   8   5   41.00    6.30
  -7   8   5    8.20    5.20
   7   8  -5   16.10    6.80
   7   8   5   13.60    5.30
  -8   8   5   12.00    5.30
   8   8  -5    0.90    7.00
   8   8   5    6.80    5.70
   0   9   5  191.78   10.20
  -1   9   5  169.08    9.40
   1   9  -5  157.48    9.10
   1   9   5  160.38    9.40
  -1   9  -5  166.88    8.30
   2   9  -5   10.60    3.20
  -2   9   5    8.50    3.10
   2   9   5    7.70    3.10
  -2   9  -5    5.10    2.00
  -3   9   5    5.70    3.20
   3   9  -5   12.90    3.80
   3   9   5   20.90    4.30
  -3   9  -5   14.70    2.20
   4   9  -5   88.79    8.10
  -4   9   5   76.09    7.60
  -4   9  -5   79.59    4.50
   4   9   5   70.39    7.10
  -5   9   5   21.20    5.00
   5   9  -5   22.10    5.60
   5   9   5   23.30    5.40
  -5   9  -5   22.60    2.60
  -6   9   5   -1.00    3.90
   6   9  -5   -2.70    4.20
   6   9   5   -0.20    4.00
  -7   9   5    1.90    4.90
   7   9  -5    1.50    6.00
   7   9   5   -1.20    4.70
  -8   9   5   17.40    5.90
   8   9  -5   17.50    8.30
   8   9   5   13.70    6.60
   0  10  -5    1.60    2.10
   0  10   5   -2.80    2.20
  -1  10   5   21.50    4.10
   1  10  -5   13.80    3.30
   1  10   5   20.40    4.00
   2  10  -5  137.49    8.90
  -2  10   5  133.59    8.90
   2  10   5  115.89    8.30
  -2  10  -5  122.29    7.10
  -3  10   5   39.50    5.60
   3  10  -5   49.10    6.60
   3  10   5   52.39    6.80
  -3  10  -5   38.60    4.00
   4  10  -5   17.70    4.70
  -4  10   5   10.00    4.30
   4  10   5   14.20    4.00
  -4  10  -5   13.90    2.40
   5  10  -5    6.80    4.40
  -5  10   5   -2.40    3.50
   5  10   5   -1.10    4.00
  -5  10  -5   -1.40    2.00
  -6  10   5   49.10    9.20
   6  10  -5   52.59    8.50
   6  10   5   39.00    7.00
   7  10  -5    9.70    6.50
  -7  10   5    5.30    5.30
   7  10   5   15.30    6.00
   8  10  -5    0.40    6.40
  -8  10   5   -3.00    5.20
   8  10   5    5.80    6.00
   0  11  -5   35.00    4.40
   0  11   5   34.00    4.90
  -1  11   5   26.80    4.50
   1  11  -5   26.60    4.30
   1  11   5   31.40    4.70
  -1  11  -5   29.60    3.90
  -2  11   5   26.20    4.70
   2  11  -5   28.50    4.70
   3  11  -5   26.90    6.60
  -3  11   5   29.10    5.30
  -3  11  -5   25.70    3.60
   3  11   5   29.20    5.20
   4  11  -5  125.39    9.90
  -4  11   5   97.79    9.30
   4  11   5  100.09    9.40
  -4  11  -5   99.69    6.30
   5  11  -5   27.90    6.00
   5  11   5   29.10    6.10
  -5  11  -5   24.90    3.20
  -6  11   5   18.50    5.60
   6  11  -5   12.40    5.70
   6  11   5   11.50    5.60
  -7  11   5    7.10    5.40
   7  11  -5   14.50    9.50
   0  12  -5   62.99    5.90
  -1  12   5   24.00    4.60
   1  12  -5   27.60    4.60
   1  12   5   23.30    4.50
  -1  12  -5   26.40    4.00
   2  12  -5   27.60    5.10
  -2  12   5   22.30    5.00
  -2  12  -5   25.60    4.00
   2  12   5   23.60    4.70
   3  12  -5   61.99    7.50
  -3  12   5   72.49    8.90
   3  12   5   57.89    7.20
  -4  12   5    4.00    5.20
   4  12  -5    8.10    4.10
   4  12   5    5.50    4.60
  -4  12  -5   10.50    3.00
   5  12  -5   38.30    7.60
  -5  12   5   28.90    6.50
   5  12   5   34.90    7.30
   6  12  -5   33.40    7.20
  -6  12   5   20.90    5.90
   6  12   5   21.20    6.80
   7  12  -5   13.60    6.80
  -7  12   5    9.70    6.20
   7  12   5   10.60    6.70
   0  13   5   56.29    7.20
   0  13  -5   54.59    6.20
  -1  13   5   43.00    6.20
   1  13  -5   61.09    6.90
   1  13   5   50.69    6.80
  -1  13  -5   41.30    5.60
   2  13  -5  123.89    9.60
  -2  13   5  130.09   10.40
  -2  13  -5  136.29    8.90
   2  13   5  146.79   10.60
  -3  13   5   46.00    6.60
   3  13  -5   42.00    6.40
  -3  13  -5   34.70    4.80
   3  13   5   51.09    7.20
   4  13  -5    8.50    4.80
  -4  13   5   -1.80    4.80
   4  13   5   22.10    5.80
  -5  13   5    6.30    5.40
   5  13  -5   11.90    6.20
   5  13   5   12.20    5.80
   6  13  -5    4.70    6.20
  -6  13   5   -2.30    4.80
   6  13   5    2.10    5.50
   0  14  -5   93.29    8.00
   0  14   5   91.79    9.00
   1  14  -5   57.79    7.30
  -1  14   5   67.29    7.80
   1  14   5   44.10    6.60
  -1  14  -5   62.89    6.90
   2  14  -5    7.00    4.20
  -2  14   5    4.40    4.20
  -2  14  -5    4.00    3.40
   2  14   5    2.70    4.60
   3  14  -5   14.10    5.40
  -3  14   5   13.10    5.20
   3  14   5   15.10    5.30
  -3  14  -5    8.60    4.00
  -4  14   5   47.90    7.90
   4  14  -5   51.29    8.00
  -4  14  -5   46.30    6.80
   4  14   5   69.79    8.90
  -5  14   5   21.00    6.40
   5  14   5   41.60    7.80
   0  15   5    4.10    4.40
   0  15  -5   -4.60    3.20
  -1  15   5   19.40    5.30
   1  15  -5   11.30    4.40
   1  15   5   13.10    5.10
  -1  15  -5    3.50    3.80
   2  15  -5   26.50    5.80
  -2  15   5   26.80    6.00
   2  15   5   34.50    6.70
  -2  15  -5   36.20    5.50
   3  15  -5   25.90    6.00
  -3  15   5   21.50    5.90
  -3  15  -5   16.50    4.60
   3  15   5   30.70    7.20
   4  15  -5   -1.20    5.40
  -4  15   5    4.40    5.20
   4  15   5    3.80    5.00
   0  16  -5    6.90    4.40
   0  16   5    9.60    5.10
   1  16  -5    9.60    4.60
  -1  16   5   14.20    5.20
   1  16   5   11.20    5.70
  -1  16  -5    9.10    4.30
   2  16  -5   -0.80    4.60
  -2  16   5   -4.80    4.60
  -2  16  -5   -0.70    4.60
  -3  16   5    1.70    5.10
   3  16  -5   -5.30    4.50
  -3  16  -5   -7.60    6.20
   3  16   5    4.10    5.50
   0   0  -6  225.18    9.40
   0   0   6  223.08    9.50
  -1   0   6  753.92   29.30
   1   0   6  770.72   28.60
  -1   0  -6  747.23   28.50
  -2   0  -6   10.20    1.40
   2   0   6   11.90    1.50
  -2   0   6   11.70    2.40
  -3   0   6   43.60    4.10
   3   0   6   41.50    2.80
   4   0   6  447.36   18.00
  -4   0   6  447.26   19.80
  -5   0   6  104.59    7.90
   5   0   6   98.29    6.00
  -6   0   6    8.70    3.90
   6   0   6   14.60    3.80
  -7   0   6   12.30    8.00
   7   0   6    4.60    3.10
   8   0   6   76.89    7.40
  -8   0   6   74.69    9.50
   9   0   6    5.80    4.40
   9   0  -6    8.20    6.10
  -9   0   6    7.20    6.30
   0  -1   6  890.81   34.10
   0   1   6  924.91   34.40
   0   1  -6  895.71   34.00
  -1   1   6   76.89    4.60
  -1   1  -6   79.69    4.00
   1   1   6   82.49    4.20
  -1  -1   6   80.89    4.70
  -2   1   6  374.66   15.80
   2  -1   6  371.36   14.00
  -2   1  -6  356.96   14.90
  -2  -1   6  373.76   15.80
   2   1   6  355.06   14.50
   3  -1   6  244.08   10.00
   3  -1   6  237.18   10.20
  -3   1   6  248.08   12.00
  -3   1  -6  257.07   10.30
   3   1   6  263.17   10.80
  -3  -1   6  259.37   12.10
   4  -1   6  167.18    7.70
  -4   1   6  183.98    9.90
   4   1   6  163.18    8.20
  -4  -1   6  182.78   10.00
  -5   1   6   25.80    4.50
   5  -1   6   23.90    3.10
   5   1   6   22.20    3.20
  -5  -1   6   23.90    4.40
   6  -1   6  138.09    8.10
  -6   1   6  156.68   10.30
  -6  -1   6  156.18   10.50
   6   1   6  148.59    8.70
   7  -1   6   27.00    4.20
  -7   1   6   25.30    5.30
  -7  -1   6   31.40    7.40
   7   1   6   24.40    4.40
   8   1  -6   11.10    5.60
  -8   1   6   11.90    4.90
   8  -1   6    5.40    3.80
   8   1   6    6.40    4.00
  -8  -1   6   18.70    5.90
   9  -1   6   -8.20    3.60
  -9   1   6   -2.30    5.20
   9   1  -6   -2.90    5.60
   9   1   6   -7.80    4.30
   9  -1  -6   -2.10    4.90
  -9  -1   6    3.60    5.40
   0   2   6   31.70    2.80
   0  -2   6   30.10    2.40
   0   2  -6   29.80    2.20
  -1   2   6  367.76   16.80
   1  -2   6  376.46   15.60
  -1  -2   6  442.96   16.90
  -1   2  -6  428.66   15.60
   1   2   6  442.76   16.50
  -2   2   6  536.15   21.80
   2   2   6  533.95   20.90
  -2  -2   6  520.35   21.70
   3  -2   6   66.29    3.10
  -3   2   6   74.19    5.30
   3  -2   6   64.09    3.20
   3   2   6   82.09    4.60
  -3  -2   6   78.29    6.40
   4  -2   6  190.18    8.30
   4  -2   6  187.68    8.40
  -4   2   6  179.98   10.50
  -4  -2   6  209.68   10.90
   4   2   6  221.88    9.80
  -5   2   6   39.00    5.20
   5  -2   6   44.80    3.50
  -5  -2   6   38.10    5.30
   5   2   6   43.50    4.50
   6  -2   6   34.20    4.00
  -6   2   6   39.70    5.60
   6   2   6   34.60    4.70
  -6  -2   6   36.90    5.80
   7   2  -6    6.90    4.90
  -7   2   6    9.80    4.60
   7   2   6   15.60    4.00
  -7  -2   6   15.80    4.80
   8  -2   6   39.50    5.20
   8   2  -6   34.20    7.60
  -8   2   6   36.10    6.50
   8   2   6   45.50    6.30
  -8  -2   6   39.40    6.80
  -9   2   6    9.60    5.50
   9   2  -6    2.80    6.60
   9  -2   6    7.90    4.00
  -9  -2   6    2.00    5.20
   9   2   6    8.70    4.90
   0  -3   6  145.69    6.70
   0   3   6  149.29    7.10
   0   3  -6  143.49    6.50
  -1  -3   6   26.40    2.90
   1   3   6   29.90    2.70
  -1   3  -6   29.90    1.80
  -1   3  -6   29.20    1.80
  -2   3   6  174.88    9.30
  -2  -3   6  193.48    9.50
   2   3   6  199.38    8.90
   3   3   6   72.49    5.00
  -3  -3   6   76.49    5.80
  -4   3   6   36.40    4.70
   4  -3   6   33.50    2.50
   4   3   6   39.10    4.80
  -4  -3   6   44.60    5.30
   5   3  -6   60.89    7.20
  -5   3   6   65.39    6.60
   5  -3   6   62.09    4.00
  -5  -3   6   86.29    7.10
   5   3   6   81.39    6.00
  -6   3   6   26.90    5.00
   6   3  -6   22.50    5.20
   6  -3   6   29.30    3.60
   6   3   6   30.70    4.70
  -6  -3   6   29.40    5.70
   7   3  -6   44.10    8.00
   7  -3   6   45.80    4.80
  -7   3   6   42.00    6.60
   7   3   6   37.50    5.60
  -7  -3   6   42.10    6.80
   8  -3   6   22.60    4.20
  -8   3   6   33.80    6.40
   8   3  -6   33.30    7.40
  -8  -3   6   26.80    6.20
   9   3  -6    8.10    7.00
  -9   3   6   22.40    6.60
   9  -3   6    7.40    4.00
   9   3   6   14.90    5.10
  -9  -3   6    3.00    5.40
   0   4   6  564.54   22.70
   0  -4   6  569.94   22.20
   0   4  -6  573.54   22.20
  -1   4   6   21.40    3.00
  -1   4  -6   34.00    2.20
   1   4   6   35.40    3.10
  -1  -4   6   32.30    3.20
  -2   4   6   28.70    3.70
   2   4  -6   28.10    3.70
  -3   4   6  121.19    7.50
   3   4  -6  112.79    7.50
  -4   4   6   26.20    3.90
   4   4  -6   21.40    3.90
   4   4   6   25.90    3.80
  -4  -4   6   27.70    4.60
   5  -4   6   17.00    2.10
   5  -4   6   15.40    1.80
   5   4  -6   17.90    4.70
  -5   4   6   14.60    4.00
   5   4   6   13.70    3.40
  -5  -4   6    7.10    3.80
   6   4  -6   95.29    9.60
  -6   4   6   89.39    8.20
   6  -4   6   89.39    5.30
  -6  -4   6   79.69    8.50
   6   4   6  104.69    7.40
   7  -4   6   11.90    2.70
  -7   4   6   17.00    5.40
   7   4  -6   12.50    5.60
   7   4   6   15.90    4.20
  -7  -4   6   16.70    5.40
  -8   4   6   10.60    5.30
   8   4  -6    7.60    6.30
   8   4   6   16.90    4.70
  -8  -4   6   11.70    5.70
  -9   4   6    9.20    5.90
   9   4  -6    7.70    7.10
   9   4   6    7.10    4.80
  -9  -4   6    0.40    5.80
   0   5  -6   20.40    2.50
   0   5   6   18.30    2.60
  -1   5  -6  149.69    6.40
  -1   5  -6  144.99    6.40
   1   5   6  150.78    7.60
  -1  -5   6  146.49    7.60
   2   5  -6   30.90    4.10
  -2   5   6   39.10    4.90
  -2  -5   6   41.60    4.20
   2   5   6   38.30    3.90
  -3   5   6   94.69    6.70
   3   5  -6  103.09    7.10
   3   5   6   74.49    5.70
  -3  -5   6   87.59    6.50
  -4   5   6  262.37   13.60
   4   5  -6  265.37   14.10
   4   5   6  270.57   13.00
  -4  -5   6  266.47   13.90
   5   5  -6   75.29    7.50
  -5   5   6   75.09    7.00
   5   5   6   71.79    6.60
  -5  -5   6   61.89    7.20
   6  -5   6   20.40    2.70
  -6   5   6   24.00    4.90
   6  -5   6   19.00    2.30
   6   5   6   24.10    4.40
  -6  -5   6   22.80    8.00
  -7   5   6   -3.30    5.90
   7   5  -6   -1.20    5.20
   7  -5   6    0.30    2.10
   7   5   6    3.30    6.40
  -7  -5   6    8.40    4.30
   8   5  -6   53.79    9.70
   8  -5   6   31.50    4.10
  -8   5   6   45.30    7.00
  -8  -5   6   46.30    7.80
   8   5   6   36.80    6.40
  -9   5   6   -0.60    5.60
   9   5  -6    7.90   11.80
   9   5   6    5.30    5.40
   0   6   6  105.09    6.30
   0   6  -6  104.29    5.70
  -1   6   6   77.79    5.20
   1   6  -6   76.59    5.10
  -1   6  -6   61.49    3.90
  -1   6  -6   62.69    3.70
   1   6   6   58.09    4.60
   2   6  -6   96.79    6.70
  -2   6   6   93.39    6.60
   2   6   6   94.39    6.30
  -2   6  -6   91.99    4.30
  -2  -6   6  105.89    6.60
  -3   6   6  128.69    8.00
   3   6  -6  133.09    8.40
  -3  -6   6   98.59    7.50
   3   6   6  107.19    7.30
  -4   6   6   60.59    6.20
   4   6  -6   55.59    6.70
  -4  -6   6   60.29    6.40
   4   6   6   48.30    5.50
  -5   6   6   72.19    7.00
   5   6  -6   71.19    8.10
  -5  -6   6   58.99    7.20
   5   6   6   57.79    6.40
   6   6  -6  107.59   11.00
  -6   6   6  137.49   10.40
   6   6   6  114.89    9.00
  -6  -6   6  135.89   10.50
  -7   6   6   51.59    9.20
   7  -6   6   45.70    3.80
   7   6  -6   60.09    9.10
   7   6   6   43.10    6.30
  -7  -6   6   37.90    7.10
  -8   6   6   14.20    5.50
   8   6  -6   21.20    8.20
   8   6   6    9.80    5.20
  -9   6   6    8.60    6.00
   9   6  -6    5.00    6.80
   9   6   6    5.80    5.60
   0   7   6   22.10    3.30
   0   7  -6   17.10    2.60
  -1   7   6  373.76   16.70
   1   7  -6  384.36   16.60
   1   7   6  371.16   16.60
  -1   7  -6  383.46   15.30
  -2   7   6  263.47   12.20
   2   7  -6  246.48   12.20
  -2   7  -6  227.08    9.60
  -2   7  -6  217.18    9.50
   2   7   6  221.28   11.40
  -3   7   6   56.69    5.80
   3   7  -6   50.59    5.90
   3   7   6   58.49    5.70
  -4   7   6   35.20    5.30
   4   7  -6   31.00    5.30
   4   7   6   31.70    4.80
   5   7  -6   66.19    8.20
  -5   7   6   69.69    7.20
   5   7   6   63.49    6.90
  -6   7   6   68.29    7.70
   6   7  -6   52.49    8.00
   6   7   6   46.10    6.50
   7   7  -6   41.50    8.20
  -7   7   6   38.60    6.70
   7   7   6   41.30    6.50
   8   7  -6    9.30    6.60
  -8   7   6    8.30    5.10
   8   7   6   14.70    5.80
   0   8  -6  352.06   15.20
   0   8   6  352.16   16.00
  -1   8   6  190.68   10.30
   1   8  -6  202.78   10.40
  -1   8  -6  202.78    9.20
   1   8   6  206.68   10.60
   2   8  -6   24.90    4.00
  -2   8   6   30.20    4.40
   2   8   6   13.60    3.10
  -2   8  -6   16.00    2.20
  -3   8   6  133.99    9.10
   3  -8   6  119.99    5.90
   3   8  -6  136.69    9.10
  -3   8  -6  135.79    5.90
  -3   8  -6  139.49    6.90
   3   8   6  136.79    8.70
  -4   8   6   62.39    6.90
   4   8  -6   76.19    7.60
   4   8   6   60.29    6.40
   5   8  -6   76.19    8.30
  -5   8   6   75.09    8.10
   5   8   6   82.49   11.40
   6   8  -6   10.20    5.30
  -6   8   6   13.70    4.90
   6   8   6    4.70    4.30
  -7   8   6    6.70    4.80
   7   8  -6    8.50    5.80
   7   8   6   10.20    5.20
   8   8  -6   13.10    8.90
  -8   8   6   22.50    6.20
   8   8   6   14.20    6.00
   0   9   6   12.30    3.20
   1   9  -6   57.19    5.60
  -1   9   6   61.09    5.60
  -1   9  -6   60.79    4.60
   1   9   6   65.19    5.80
   2   9  -6  112.29    8.10
  -2   9   6  127.49    8.40
   2   9   6  126.29    8.40
  -2   9  -6  118.29    6.40
   3   9  -6  111.19    8.60
  -3   9   6  106.19    8.20
   3   9   6   99.29    8.10
  -4   9   6    1.50    3.50
   4   9  -6    6.60    4.30
  -5   9   6   12.60    4.70
   5   9  -6   22.60    5.80
   5   9   6   19.40    4.50
   6   9  -6   40.60    7.60
  -6   9   6   36.40    8.60
   6   9   6   31.10    6.30
   7   9  -6   16.00    5.90
  -7   9   6   20.40    5.90
   7   9   6   26.30    6.40
   8   9  -6   10.70    7.10
  -8   9   6   12.10    5.60
   8   9   6    3.60    6.00
   0  10   6  166.48    9.80
   0  10  -6  163.88    9.10
   1  10  -6   36.40    4.50
  -1  10   6   37.80    4.90
  -1  10  -6   26.70    3.40
   1  10   6   22.40    3.90
  -2  10   6    7.90    3.40
   2  10  -6   11.40    3.70
  -2  10  -6    5.60    2.20
   2  10   6   10.00    3.60
   3  10  -6    7.30    3.70
  -3  10   6    6.30    3.70
  -3  10  -6    6.30    2.00
  -4  10   6   72.69    8.00
   4  10  -6   76.59    8.20
   4 -10   6   60.69    5.30
   4  10   6   71.39    7.70
  -4  10  -6   62.09    5.30
  -4  10  -6   63.79    4.10
   5  10  -6   17.20    5.40
  -5  10   6    8.60    4.70
   5  10   6   13.40    4.80
   6  10  -6    0.70    5.20
  -6  10   6   11.50    5.20
   6  10   6    9.60    5.00
   7  10  -6   -1.40    5.20
  -7  10   6   -2.60    4.70
   7  10   6    8.60    4.90
   0  11  -6   39.40    4.90
   0  11   6   33.00    5.10
  -1  11   6   10.40    3.50
   1  11  -6    9.70    3.10
  -1  11  -6    6.20    2.60
   1  11   6    7.80    3.10
  -2  11   6   81.39    7.70
   2  11  -6   93.49    7.80
   2  11   6   90.69    7.90
  -2  11  -6   75.49    5.90
  -3  11   6    9.90    4.00
  -3  11  -6    4.80    2.40
   3  11   6    4.90    3.80
   4  11  -6    9.30    4.30
  -4  11   6    8.60    7.00
   4  11   6   16.40    4.80
  -4  11  -6   14.30    2.50
   5  11  -6   22.70    5.90
   5  11   6   23.80    6.00
  -6  11   6   34.50    6.70
   6  11  -6   36.30    6.80
   6  11   6   33.20    6.90
   7  11  -6    6.80    6.10
  -7  11   6    3.50    5.20
   0  12   6   49.00    6.50
   0  12  -6   52.19    5.70
  -1  12   6   11.10    4.80
   1  12  -6    8.40    3.40
   1  12   6   13.70    4.10
  -1  12  -6   18.00    3.60
   2  12  -6   69.09    7.10
  -2  12   6   51.69    8.80
   2  12   6   76.59    7.80
  -2  12  -6   63.49    5.80
  -3  12   6   24.30    5.30
   3  12  -6   23.40    5.00
  -3  12  -6   15.30    3.20
   3  12   6   21.30    4.90
  -4  12   6   22.00    5.60
   4  12  -6   20.60    5.30
  -4  12  -6   22.10    3.00
   4  12   6   24.20    5.80
   5  12  -6   16.90    5.70
   5  12   6   25.20    6.30
  -6  12   6    6.90    5.30
   6  12  -6   16.00    6.80
   6  12   6   13.40    6.90
   0  13  -6  110.19    8.10
   0  13   6  105.99    9.20
  -1  13   6   79.59    8.00
   1  13  -6   67.09    6.80
  -1  13  -6   75.19    6.70
   1  13   6   87.19    8.50
  -2  13   6   31.40    5.70
   2  13  -6   29.10    5.60
   2  13   6   36.30    6.10
  -2  13  -6   25.50    4.40
  -3  13   6    3.40    4.30
   3  13  -6   15.90    4.80
   3  13   6   14.60    5.20
  -4  13   6   28.80    6.60
   4  13  -6   25.10    6.20
  -4  13  -6   42.30    5.50
   4  13   6   50.19    7.70
  -5  13   6    7.50    5.90
   5  13  -6    8.50    5.60
   5  13   6   26.60    6.50
   6  13  -6    7.10    6.10
  -6  13   6   -1.20    4.90
   6  13   6   -2.00    5.50
   0  14   6    1.10    3.60
   0  14  -6   -0.50    2.80
  -1  14   6   61.79    7.70
   1  14  -6   58.59    7.20
   1  14   6   74.69    8.70
  -1  14  -6   43.00    5.70
  -2  14   6   45.70    6.70
   2  14  -6   54.89    7.20
   2  14   6   30.30    6.10
  -2  14  -6   38.60    5.30
  -3  14   6   85.79    9.00
   3  14  -6   71.69    8.90
   3  14   6   71.99    9.60
  -4  14   6   13.20    5.60
   4  14  -6   15.80    6.20
   4  14   6   26.60    6.40
   5  14  -6    6.40    8.90
  -5  14   6   -3.60    5.00
   5  14   6    4.50    5.40
   0  15  -6   11.00    4.20
   0  15   6   14.00    5.20
   1  15  -6   25.10    5.30
  -1  15   6   20.90    5.60
  -1  15  -6   14.40    4.30
   1  15   6   20.60    5.60
  -2  15   6   -5.60    4.30
   2  15  -6   -2.70    3.70
   2  15   6    3.00    4.60
  -2  15  -6   -1.20    3.60
   3  15  -6   14.80    5.50
  -3  15   6   19.20    5.70
  -3  15  -6   16.10    4.80
   3  15   6    7.70    7.40
   4  15  -6   13.90    7.20
  -4  15   6   17.70    6.80
   4  15   6   16.60    6.10
   0  16  -6   -2.00    3.60
   0  16   6   -1.20    4.80
   1  16  -6    2.00    4.10
  -1  16   6   14.30    5.40
  -1  16  -6    0.40    4.40
   1  16   6    9.70    5.80
   2  16  -6    1.80    4.20
  -2  16   6   -5.20    4.20
   2  16   6    9.00    5.50
  -2  16  -6   -5.60    4.20
   0   0   7    0.70    1.10
   1   0   7  776.62   29.20
  -1   0   7  779.42   30.00
  -1   0  -7  748.63   29.10
   2   0   7  134.79    6.00
  -2   0  -7  130.59    6.10
  -2   0   7  142.79    7.50
   3   0   7  385.16   15.30
   4   0   7    3.90    1.50
  -4   0   7    4.50    2.70
  -5   0   7   25.60    4.70
   5   0   7   25.00    3.30
  -6   0   7  161.78   11.10
  -7   0   7   58.69    7.60
   7   0   7   61.79    6.10
  -8   0   7    6.20    4.70
   8   0   7    4.00    3.50
  -9   0   7    4.60    5.70
   9   0   7   -3.80    3.60
   9   0  -7    4.20    5.40
   0   1   7  132.19    6.50
   0  -1   7  128.39    6.20
   1  -1   7  580.74   21.70
  -1   1   7  579.24   22.80
   1   1   7  568.54   22.00
  -1   1  -7  532.15   21.60
  -1  -1   7  579.24   22.70
  -2   1   7  363.86   15.90
   2  -1   7  378.16   14.30
  -2  -1   7  379.36   16.10
  -2   1  -7  358.96   14.20
   2   1   7  359.46   14.70
   3  -1   7   28.60    2.30
   3  -1   7   33.40    2.30
  -3   1   7   29.80    4.70
   3   1   7   34.40    3.00
  -3   1  -7   33.60    2.40
  -3  -1   7   32.00    4.50
   4  -1   7  288.47   12.00
  -4   1   7  305.57   14.70
   4   1   7  293.17   12.70
  -4  -1   7  298.07   14.70
   5  -1   7  132.29    6.70
  -5   1   7  137.79    9.20
  -5  -1   7  126.29    8.90
   5   1   7  132.09    7.30
   6  -1   7   56.79    4.70
  -6   1   7   58.09    7.10
  -6  -1   7   51.99    6.90
   6   1   7   49.00    5.30
   7  -1   7   -2.30    2.50
  -7   1   7    5.70    4.60
  -7  -1   7    4.00    4.00
   7   1   7   -2.20    2.80
   8   1  -7   32.20    7.50
  -8   1   7   39.30    7.00
   8  -1   7   28.40    4.80
   8   1   7   36.40    5.50
  -8  -1   7   30.20    6.20
   9  -1   7    0.20    4.00
   9   1  -7    7.20    7.10
  -9   1   7   13.90    6.50
  -9  -1   7   12.10    5.90
   0   2  -7  574.14   23.10
   0   2   7  596.94   23.20
   0  -2   7  587.04   22.80
  -1   2  -7   22.30    1.90
  -1  -2   7   24.10    2.90
   1   2   7   26.30    2.50
   2  -2   7  446.06   17.50
  -2   2   7  449.66   19.60
  -2  -2   7  481.55   19.70
   2   2   7  479.55   18.70
  -2   2  -7  476.95   17.50
   3  -2   7  121.09    5.10
   3  -2   7  121.39    4.90
  -3   2   7  120.49    7.60
  -3  -2   7  119.19    7.60
   3   2   7  121.39    6.30
   4  -2   7  169.78    7.00
  -4   2   7  170.88    9.90
   4  -2   7  168.18    7.10
  -4  -2   7  145.59    9.40
   4   2   7  157.28    8.20
  -5   2   7    8.30    3.40
   5  -2   7   13.00    2.00
   5   2   7    8.90    2.60
  -5  -2   7   13.60    3.90
   6  -2   7  109.19    6.30
  -6   2   7  109.69    9.10
  -6  -2   7  114.69    9.20
   6   2   7  113.49    7.60
   7  -2   7   23.10    3.50
   7   2  -7   16.30    6.10
  -7   2   7   33.90    6.80
   7   2   7   22.00    4.20
  -7  -2   7   24.20    6.00
   8  -2   7   15.20    3.70
   8   2  -7   12.60    5.80
  -8   2   7   21.90    6.00
   8   2   7   15.10    4.40
  -8  -2   7   12.70    5.50
  -9   2   7    1.60    5.70
   9  -2   7   -4.50    3.50
   9   2  -7    2.30    6.50
   9   2   7    1.80    4.40
  -9  -2   7    6.70    5.40
   0  -3   7  279.17   11.70
   0   3   7  280.77   12.10
  -1   3   7   84.39    5.80
   1  -3   7   96.79    4.70
   1   3   7  109.29    5.60
  -1  -3   7  109.99    5.90
  -2   3   7  100.09    6.40
   2   3   7   96.99    5.50
  -2  -3   7   91.39    6.10
  -3   3   7   15.60    3.10
  -3  -3   7    5.70    2.30
   3   3   7    6.90    2.10
  -4   3   7   88.59    7.10
  -4  -3   7   94.79    7.40
   4   3   7   97.49    6.20
  -5   3   7   80.19    7.20
   5  -3   7   75.29    4.20
   5  -3   7   79.99    4.20
   5   3   7   94.09    6.50
  -5  -3   7   91.39    7.70
  -6   3   7   50.79    6.70
   6  -3   7   43.20    3.70
   6   3  -7   44.20    6.80
  -6  -3   7   45.50    6.50
   6   3   7   53.89    5.80
   7   3  -7   28.80    6.80
  -7   3   7   39.60    7.60
   7  -3   7   31.70    4.20
  -7  -3   7   41.70    7.10
   7   3   7   37.50    5.10
  -8   3   7   19.40    5.70
   8   3  -7   13.30    6.00
  -8  -3   7   15.80    5.80
   9  -3   7   -0.90    4.30
   9   3  -7    9.50    6.90
  -9   3   7   -2.80    5.10
   9   3   7    0.00    4.40
  -9  -3   7   -0.80    5.70
   0   4   7  199.28    9.50
   0   4  -7  193.38    8.90
   0  -4   7  210.38    9.00
  -1   4   7  189.78    9.30
  -1   4  -7  173.58    7.80
  -1  -4   7  188.48    9.00
   1   4   7  183.38    8.70
  -2   4   7   17.30    4.20
  -2  -4   7   23.70    3.60
   2   4   7   19.40    2.70
  -3   4   7   96.99    7.00
   3   4   7   99.69    6.20
  -3  -4   7   98.69    7.00
   4   4  -7   85.59    7.30
  -4   4   7   89.49    7.30
  -4  -4   7   93.49    7.50
   4   4   7   91.09    6.30
   5   4  -7   34.20    5.60
  -5   4   7   40.90    5.60
   5   4   7   45.50    5.10
  -5  -4   7   40.50    6.10
  -6   4   7   14.30    4.40
   6   4  -7   10.90    7.00
   6  -4   7   13.30    1.90
   6   4   7   27.40    4.40
  -6  -4   7   21.10    8.00
   7   4  -7    9.20    5.90
  -7   4   7   16.90    5.50
   7  -4   7   10.10    2.40
  -7  -4   7   17.70    5.40
   7   4   7   13.80    4.00
   8  -4   7    9.10    3.10
  -8   4   7   26.40    6.20
   8   4  -7    8.60    6.20
   8   4   7   20.10    5.30
  -8  -4   7   15.10    6.30
   9   4  -7   11.30    8.70
  -9   4   7    7.60    5.90
   9   4   7    4.10    4.90
  -9  -4   7   14.70    7.40
   0   5  -7  117.89    6.10
   0  -5   7  115.09    6.00
   1   5  -7   90.69    5.60
  -1   5   7   98.09    6.10
  -1   5  -7   81.69    4.20
  -1  -5   7   78.29    5.40
   1   5   7   83.09    5.80
  -1   5  -7   80.39    4.20
  -2   5   7  563.64   23.20
   2   5   7  530.85   22.40
   3   5  -7  123.59    8.30
  -3   5   7  119.59    8.10
  -3  -5   7  127.89    8.00
   3   5   7  124.39    7.40
   4   5  -7   40.70    5.40
  -4   5   7   42.40    5.50
  -4  -5   7   42.00    5.60
   4   5   7   43.40    4.90
   5   5  -7   28.00    5.60
  -5   5   7   23.20    4.50
  -5  -5   7   29.10    5.30
   5   5   7   25.00    4.20
   6   5  -7   47.20    7.50
  -6   5   7   60.49    7.90
  -6  -5   7   59.19    7.90
   6   5   7   64.99    6.50
  -7   5   7   25.00    5.70
   7  -5   7   18.40    2.30
   7   5  -7   26.60    7.10
   7   5   7   20.40    6.90
  -7  -5   7   22.10    5.90
   8   5  -7   15.00    7.20
  -8   5   7    9.70    5.40
  -8  -5   7   17.60    6.30
   8   5   7    6.40    4.40
   9   5  -7    0.30    9.50
  -9   5   7    9.60    6.00
  -9  -5   7   11.80    9.10
   9   5   7    4.30    5.30
   0   6  -7  632.64   24.80
   0   6   7  615.44   25.40
  -1   6   7   51.49    4.50
   1   6  -7   53.89    4.50
   1   6   7   40.60    4.20
  -1  -6   7   44.20    4.10
  -1   6  -7   43.80    3.10
  -1   6  -7   42.20    3.00
   2   6  -7  115.09    7.50
  -2   6   7  124.99    7.60
   2   6   7  106.09    6.90
  -2  -6   7  100.69    7.20
   3   6  -7  114.69    7.80
  -3   6   7  104.39    7.70
   3   6   7   94.49    6.90
  -3  -6   7  100.09    7.60
   4   6  -7  175.48   11.00
  -4   6   7  162.48   10.40
   4   6   7  165.68    9.70
  -4  -6   7  157.08   10.40
  -5   6   7   96.69    8.30
   5   6  -7  100.99    9.40
  -5  -6   7   84.49    7.90
   5   6   7   92.29    7.50
  -6   6   7   34.30    5.90
   6   6  -7   37.70    7.40
   6   6   7   23.30    5.00
  -6  -6   7   25.70    5.50
   7   6  -7   40.70    7.60
  -7   6   7   46.60    6.90
  -7  -6   7   43.40    7.50
   7   6   7   37.80    6.10
   8   6  -7   27.50    8.10
  -8   6   7   40.00    6.90
  -8  -6   7   44.50    8.40
   8   6   7   37.70    6.50
   9   6  -7   20.50    8.50
  -9   6   7   20.00    6.70
   9   6   7    3.50    6.00
   0   7  -7   85.19    5.50
   0   7   7   90.49    6.20
   1   7  -7  218.58   10.80
  -1   7   7  204.28   10.70
   1   7   7  199.88   10.60
  -1   7  -7  214.98    9.20
  -2   7   7  115.89    7.90
   2   7  -7  114.19    7.80
  -2   7  -7  117.39    5.30
  -2   7  -7  114.39    5.50
   2   7   7  121.59    7.60
   3   7  -7  153.28   10.00
  -3   7   7  154.48    9.70
  -3  -7   7  148.49    9.70
   3   7   7  164.08    9.40
   4   7  -7  103.59    8.90
  -4   7   7  117.69    8.40
   4   7   7   94.79    7.70
  -4  -7   7   93.19    8.20
  -5   7   7  109.29    9.30
  -5  -7   7  101.59   12.40
   5   7   7  106.99    8.50
   6   7  -7   24.40    6.30
  -6   7   7   37.60    6.20
  -6  -7   7   31.60    6.40
   6   7   7   40.30    6.00
   7   7  -7   25.90    7.60
  -7   7   7   13.80    5.40
   7   7   7   22.80    5.50
  -8   7   7   18.30    5.60
   8   7  -7   12.90    7.00
   8   7   7   23.70    6.20
   0   8  -7    0.20    1.80
   0   8   7   -0.80    2.20
   1   8  -7  178.88    9.90
  -1   8   7  179.78   10.10
   1   8   7  199.08   10.30
  -1   8  -7  194.38    8.80
   2   8  -7  146.89    9.30
  -2   8   7  161.78    9.70
  -2   8  -7  158.98    7.10
   2   8   7  158.28    9.20
   3   8  -7  272.57   14.80
  -3   8   7  293.07   14.90
   3   8   7  290.27   14.50
  -4   8   7   10.30    4.00
   4   8  -7   11.80    4.30
   4   8   7   11.70    3.70
   5   8  -7   34.70    6.50
  -5   8   7   26.40    5.40
   5   8   7   34.90    5.30
   6   8  -7   45.50    8.00
  -6   8   7   53.39    8.20
   6   8   7   49.80    6.70
  -7   8   7   35.50    6.90
   7   8  -7   31.10    8.10
   7   8   7   31.10    6.10
  -8   8   7   10.30    5.80
   8   8   7   11.40    5.60
   0   9   7  179.18   10.20
   1   9  -7  147.99    8.80
  -1   9   7  148.79    9.00
   1   9   7  146.09    9.00
  -1   9  -7  136.49    7.40
  -2   9   7    0.50    2.40
   2   9  -7    3.90    3.00
  -2   9  -7   -2.00    1.60
   2   9   7    0.90    2.80
  -3   9   7   19.60    4.50
   3   9  -7   25.20    5.10
   3   9   7   20.80    4.10
  -3   9  -7   20.40    2.70
  -4   9   7   87.69    8.40
   4   9  -7   93.39    9.80
   4   9   7   92.59    9.00
  -5   9   7   52.69    7.50
   5   9  -7   53.89    7.50
   5   9   7   71.39    8.20
   6   9  -7   -7.90    4.30
  -6   9   7    1.00    4.10
   6   9   7    5.00    4.60
  -7   9   7    3.30    5.20
   7   9  -7   15.80    7.30
   7   9   7   11.80    5.60
   8   9  -7   11.60    7.80
  -8   9   7   17.80    6.10
   8   9   7    9.60    8.00
   0  10  -7   -0.10    2.10
   0  10   7    3.10    2.80
  -1  10   7   20.60    4.10
   1  10  -7   26.40    4.20
   1  10   7   37.90    5.10
  -1  10  -7   36.40    3.90
   2  10  -7  132.29    8.80
  -2  10   7  132.19    9.10
  -2  10  -7  105.39    6.40
   2  10   7  103.59    8.40
   3  10  -7   69.89    7.10
  -3  10   7   49.40    6.60
   3  10   7   59.79    7.00
  -4  10   7   10.20    4.90
   4  10  -7   19.00    5.10
   4  10   7   14.30    4.70
   5  10  -7   -0.10    4.50
  -5  10   7   -0.60    4.30
   5  10   7   10.40    4.60
   6  10  -7   43.20    8.30
  -6  10   7   25.80    6.30
   6  10   7   34.00    6.80
  -7  10   7    9.00    5.50
   7  10  -7   15.40    8.40
   7  10   7   20.10    6.50
   0  11   7   24.50    4.50
   0  11  -7   20.70    3.60
   1  11  -7   41.20    5.10
  -1  11   7   29.90    4.70
   1  11   7   23.50    7.10
  -1  11  -7   35.00    4.20
   2  11  -7   30.80    5.00
  -2  11   7   37.60    5.60
  -2  11  -7   22.70    3.50
   2  11   7   31.20    4.80
   3  11  -7   27.20    9.10
   3  11   7   29.10    5.50
  -3  11  -7   29.80    3.70
   4  11  -7   67.29    8.30
  -4  11   7   46.30    7.00
   4  11   7   58.39    7.60
  -5  11   7   11.30    5.40
   5  11  -7   25.80    6.30
   5  11   7   22.70    6.00
  -6  11   7    0.70    4.90
   6  11  -7   -0.60    5.90
   6  11   7    8.30    5.50
   7  11  -7   -7.90    5.90
  -7  11   7   11.10    5.70
   7  11   7   -2.00    7.40
   0  12  -7  142.19    9.00
   0  12   7  143.39   10.20
   1  12  -7   27.50    4.70
  -1  12   7   21.10    4.50
  -1  12  -7   30.30    4.10
   1  12   7   24.20    4.70
  -2  12   7   22.50    4.90
   2  12  -7   17.50    4.30
   2  12   7   19.80    4.70
   3  12  -7   31.00    5.80
  -3  12   7   29.50    6.10
   3  12   7   36.10    5.90
  -3  12  -7   26.70    3.40
  -4  12   7   19.40    5.80
   4  12  -7   19.10    5.50
   4  12   7   19.20    5.40
  -5  12   7   -5.30    4.90
   5  12  -7    8.80    5.50
   5  12   7    8.60    5.30
  -6  12   7    9.80    5.70
   6  12  -7   30.30   10.10
   0  13  -7   30.20    4.70
   0  13   7   25.40    5.30
  -1  13   7   55.09    7.00
   1  13  -7   53.19    6.60
  -1  13  -7   44.30    5.70
   1  13   7   38.30    5.90
   2  13  -7   94.49    8.70
  -2  13   7   93.99    9.10
  -2  13  -7   88.29    7.30
   2  13   7  108.69    9.80
  -3  13   7   31.10    6.00
   3  13  -7   20.80    5.20
   3  13   7   17.50    5.90
  -3  13  -7   15.80    3.40
  -4  13   7    1.60    4.60
   4  13  -7   16.30    5.90
   4  13   7   21.10    6.10
   5  13  -7   18.40    6.40
  -5  13   7   -0.50    5.00
   5  13   7    5.70    6.80
   6  13  -7   20.80    7.60
   6  13   7   20.90    6.90
   0  14   7   51.09    7.20
   0  14  -7   51.69    6.50
  -1  14   7   38.30    6.10
   1  14  -7   37.50    5.80
   1  14   7   37.90    6.60
  -1  14  -7   26.30    4.70
  -2  14   7    4.80    4.70
   2  14  -7   -2.00    3.70
  -2  14  -7   -5.40    3.20
   2  14   7    5.00    4.40
  -3  14   7   16.70    5.90
   3  14  -7   24.70    6.10
   3  14   7    6.40    4.90
  -3  14  -7    5.50    4.60
   4  14  -7   51.29    7.90
  -4  14   7   51.09    8.10
   5  14  -7   13.10    7.50
  -5  14   7   12.30    6.50
   5  14   7   15.50    6.40
   0  15   7    4.70    4.60
   0  15  -7    4.70    4.00
  -1  15   7   14.10    5.40
   1  15  -7   14.70    4.50
  -1  15  -7    9.60    3.90
   1  15   7   25.00    6.40
   2  15  -7   23.70    5.40
  -2  15   7   29.00    6.30
  -2  15  -7   18.90    4.60
   2  15   7   34.20    6.90
   3  15  -7   16.30    5.80
  -3  15   7   18.70    5.80
   3  15   7    7.80    7.50
  -4  15   7    0.30    5.30
   4  15   7    3.60    5.40
   0  16   7   25.70    6.90
   0  16  -7   23.50    5.60
  -1  16   7   17.10    5.90
   1  16  -7   13.80    4.70
  -1  16  -7    4.80    5.30
  -2  16   7    0.10    5.10
   2  16  -7   -6.10    4.20
  -2  16  -7  -10.90    4.30
   2  16   7    2.00    5.10
   0   0   8 1918.51   71.59
   1   0   8 1872.51   69.69
  -1   0   8 1879.11   70.59
   2   0   8   79.99    4.20
  -2   0   8   85.09    5.80
   3   0   8  203.28    8.70
  -3   0   8  203.38   10.80
  -4   0   8  121.19    8.40
   4   0   8  127.49    6.30
  -5   0   8  235.28   13.40
   5   0   8  243.88   10.90
  -6   0   8   -1.20    3.20
   6   0   8   10.10    4.20
  -7   0   8   17.20    5.10
   7   0   8    7.70    3.00
   8   0   8    3.90    3.40
  -8   0   8   13.10    5.30
  -9   0   8   44.50    8.20
   9   0   8   42.00    6.00
   9   0  -8   37.40    8.20
   0  -1   8    0.30    1.40
   0   1   8    1.40    1.40
   1  -1   8  883.21   33.00
  -1   1   8  902.71   34.20
  -1   1  -8  821.02   32.80
   1   1   8  868.81   33.30
  -1  -1   8  887.11   34.00
  -2   1   8 1073.89   41.40
   2  -1   8 1051.09   39.40
   2   1   8 1075.29   39.90
  -2   1  -8 1032.70   39.40
  -2  -1   8 1050.39   41.30
   3  -1   8  666.73   24.80
  -3   1   8  699.13   27.50
  -3   1  -8  626.04   25.00
   3   1   8  645.34   25.40
  -3  -1   8  638.34   27.20
  -4   1   8  123.49    8.30
   4  -1   8  109.69    5.50
   4   1   8  115.09    6.30
  -4  -1   8  110.69    8.10
  -5   1   8   29.60    4.80
   5  -1   8   34.70    3.40
  -5  -1   8   37.60    5.50
   5   1   8   37.30    3.80
  -6   1   8   53.89    7.10
   6  -1   8   51.09    4.60
   6   1   8   66.89    5.70
  -6  -1   8   68.39    7.80
  -7   1   8   88.59    9.60
   7  -1   8   89.19    6.80
   7   1   8   97.69    7.40
  -7  -1   8   92.69    9.50
   8  -1   8    8.00    3.50
  -8   1   8    6.50    5.20
  -8  -1   8   22.10    6.50
   8   1   8   11.70    3.90
  -9   1   8   -0.70    5.40
   9  -1   8   -4.10    3.60
   9   1  -8    3.10    6.40
   9   1   8    1.50    5.10
  -9  -1   8    8.30    6.30
   0   2   8 1549.45   58.69
   0  -2   8 1563.44   58.39
   1  -2   8   22.10    2.30
  -1   2   8   27.30    3.40
   1   2   8   29.80    2.80
  -1   2  -8   31.70    2.20
  -1  -2   8   30.30    3.30
  -2   2   8  414.36   17.50
   2  -2   8  414.36   15.00
   2   2   8  383.46   16.00
  -2  -2   8  383.36   17.10
  -2   2  -8  366.76   14.90
   3  -2   8  301.97   11.70
  -3   2   8  307.67   14.50
   3  -2   8  289.67   11.90
   3   2   8  318.47   13.20
  -3  -2   8  315.47   14.70
  -4   2   8  357.76   17.20
   4  -2   8  353.16   13.90
   4  -2   8  342.27   14.10
   4   2   8  376.26   15.40
  -4  -2   8  361.36   17.30
  -5   2   8  216.68   12.20
   5  -2   8  212.58    8.90
   5   2   8  198.38   10.20
  -5  -2   8  193.38   12.00
  -6   2   8   71.69    7.80
   6  -2   8   71.39    4.70
   6   2   8   65.99    6.10
  -6  -2   8   59.09    7.80
  -7   2   8    6.60    4.70
   7  -2   8    6.50    2.70
   7   2   8   11.20    3.50
  -7  -2   8    7.90    4.80
   8   2  -8   26.60    7.20
  -8   2   8   19.80    5.80
   8  -2   8   19.60    3.80
   8   2   8   30.30    5.50
  -8  -2   8   35.90    7.50
  -9   2   8   15.00    6.70
   9  -2   8    5.30    4.10
   9   2  -8   18.40    7.80
   9   2   8    2.40    4.60
  -9  -2   8   12.60    6.70
   0  -3   8  337.97   14.00
   0   3   8  336.07   14.50
   1  -3   8  151.88    6.20
  -1   3   8  155.98    7.80
   1   3   8  127.29    6.90
  -1  -3   8  129.69    7.20
  -1   3  -8  125.79    5.90
  -2   3   8  264.57   12.60
  -2  -3   8  250.27   12.20
   2   3   8  253.57   11.30
  -3   3   8   47.80    5.30
   3   3   8   59.69    4.50
  -3  -3   8   54.49    5.20
  -4   3   8  261.27   12.90
   4   3   8  218.98   11.00
  -4  -3   8  214.28   12.50
  -5   3   8   71.69    7.40
  -5  -3   8   82.79    7.90
   5   3   8   89.39    6.30
   6  -3   8   41.30    3.40
  -6   3   8   54.19    7.30
   6   3   8   47.20    5.60
  -6  -3   8   52.19    9.40
   7  -3   8   39.80    4.10
  -7   3   8   47.50    7.30
   7   3  -8   33.20    7.30
   7   3   8   51.19    6.30
  -7  -3   8   53.69    8.10
  -8   3   8   21.80    6.00
   8  -3   8   19.60    3.50
   8   3  -8   26.20    7.50
  -8  -3   8   22.40    6.80
   8   3   8   31.80    9.50
   9   3  -8    1.50    7.50
  -9   3   8    2.00    5.70
   9   3   8   -0.40    4.60
  -9  -3   8    9.20    7.10
   0   4   8    0.80    1.50
   0  -4   8    0.10    1.30
   1  -4   8  183.38    7.60
   1   4   8  177.48    8.70
  -1   4  -8  179.58    7.60
  -1   4  -8  168.48    7.40
  -1  -4   8  183.68    9.00
  -2   4   8  367.56   16.60
  -2  -4   8  360.56   17.20
  -3   4   8   66.79    5.70
  -3  -4   8   54.29    5.60
   3   4   8   64.89    5.00
  -4   4   8    7.20    3.30
   4   4   8    7.70    2.50
  -4  -4   8    7.00    3.20
  -5   4   8   39.10    5.70
   5   4  -8   31.90    5.90
   5   4   8   37.90    4.80
  -5  -4   8   36.80    5.60
   6   4  -8   89.69    9.90
  -6   4   8   80.09    8.60
   6   4   8   86.39    7.20
  -6  -4   8   86.19    9.10
   7  -4   8   17.40    2.40
   7   4  -8   27.00    7.00
  -7   4   8   29.00    6.40
  -7  -4   8   30.40    6.50
   7   4   8   36.80    5.30
   8   4  -8   -5.00    6.20
  -8   4   8    8.70    5.00
   8   4   8    2.50    4.10
  -8  -4   8    5.70    5.30
  -9   4   8    0.60    5.60
   9   4   8   -2.20    4.50
   0   5  -8  495.75   19.70
   0   5   8  482.95   20.30
   0  -5   8  482.25   19.60
  -1   5   8   58.19    5.00
   1   5  -8   64.39    4.80
   1   5   8   54.09    4.50
  -1  -5   8   53.79    4.50
  -1   5  -8   57.29    3.30
  -1   5  -8   59.39    3.50
  -2   5   8   16.90    3.30
   2   5  -8   19.30    3.50
  -2  -5   8   16.60    3.20
   2   5   8   17.60    3.00
   3   5  -8   97.39    7.70
  -3   5   8  104.49    7.60
  -3  -5   8  100.09    7.30
   3   5   8  102.49    6.70
  -4   5   8  220.68   12.40
   4   5  -8  232.08   13.10
   4   5   8  215.28   11.30
  -4  -5   8  198.88   12.20
   5   5  -8   71.89    8.40
  -5   5   8   70.19    7.70
  -5  -5   8   75.59    7.70
   5   5   8   76.89    6.50
   6   5  -8   25.60    6.70
  -6   5   8   33.80    6.30
   6   5   8   26.60    4.70
  -6  -5   8   29.70    5.70
  -7   5   8   11.70    5.00
   7   5  -8   15.50    6.20
  -7  -5   8    5.00    4.50
   7   5   8    9.70    4.30
   8   5  -8   33.00    8.90
  -8   5   8   33.60    6.90
   8   5   8   21.00    5.50
  -8  -5   8   33.50    7.70
  -9   5   8   21.90    6.50
   9   5  -8    1.90    7.40
   9   5   8    6.00    5.60
  -9  -5   8    3.70    6.20
   0   6  -8   24.60    3.00
   0   6   8   20.60    3.10
   1   6  -8  139.59    8.00
  -1   6   8  147.09    8.30
  -1   6  -8  146.59    6.60
   1   6   8  131.29    7.90
  -1   6  -8  136.89    7.50
  -1  -6   8  157.28    8.10
  -2   6   8  257.67   13.20
   2   6  -8  263.87   13.30
  -2  -6   8  266.57   13.00
   2   6   8  265.87   12.60
   3   6  -8   99.59    7.80
  -3   6   8  104.79    7.90
  -3  -6   8  104.19    7.80
   3   6   8  110.69    7.30
   4   6  -8   19.30    4.20
  -4   6   8   26.40    4.90
  -4  -6   8   37.00    5.60
   4   6   8   33.90    4.60
  -5   6   8   53.29    7.10
   5   6  -8   55.79    7.80
   5   6   8   61.79    6.30
  -5  -6   8   52.29    7.00
   6   6  -8  109.09   10.40
  -6  -6   8  104.69   10.20
   6   6   8   90.39    8.60
   7   6  -8   48.70    9.00
  -7   6   8   43.20    7.00
   7   6   8   35.20    6.00
  -7  -6   8   51.89    8.00
   8   6  -8   39.90    9.20
  -8   6   8   43.00    7.80
  -8  -6   8   41.90    8.60
   0   7  -8  236.08   11.10
   0   7   8  241.88   11.90
  -1   7   8  401.16   18.50
  -1   7  -8  431.46   16.80
   1   7   8  412.96   18.30
   2   7  -8   17.70    3.70
  -2   7   8   17.60    3.70
   2   7   8   12.40    3.20
  -2  -7   8   11.30    3.30
  -3   7   8  185.18   11.10
   3   7  -8  184.48   11.40
  -3  -7   8  187.18   11.10
   3   7   8  195.98   10.70
  -4   7   8   66.59    7.20
   4   7  -8   65.69    7.70
  -4  -7   8   62.89    7.20
   4   7   8   62.79    6.60
   5   7  -8   55.29    8.00
  -5   7   8   52.79    7.10
  -5  -7   8   58.99    8.30
   5   7   8   73.79    7.30
   6   7  -8   46.40    8.10
  -6   7   8   43.70    6.80
   6   7   8   46.90    6.40
  -6  -7   8   52.39    7.50
  -7   7   8   49.50    7.70
   7   7  -8   44.50    7.90
   7   7   8   49.70    7.00
  -7  -7   8   44.10    7.70
   8   7  -8   14.90    9.00
  -8   7   8   17.10    6.20
   8   7   8   20.90    6.10
   0   8  -8  129.29    7.30
   0   8   8  123.59    7.90
   1   8  -8  359.76   16.00
  -1   8   8  345.27   16.30
   1   8   8  335.87   15.90
  -1   8  -8  340.17   14.40
   2   8  -8    4.40    3.20
  -2   8   8   11.70    3.30
  -2   8  -8    3.60    1.40
   2   8   8    5.90    2.80
  -2   8  -8    3.00    1.50
  -3   8   8  214.08   12.60
   3   8  -8  226.08   12.90
   3   8   8  232.38   12.40
  -4   8   8   60.09    7.20
   4   8  -8   42.00    6.30
   4   8   8   68.39    7.20
  -5   8   8  145.49   11.50
   5   8  -8  166.28   12.60
   5   8   8  182.88   11.40
   6   8  -8   -1.40    4.80
  -6   8   8    3.00    4.30
   6   8   8    7.60    4.20
  -7   8   8    6.10    5.00
   7   8  -8   -4.50    5.40
   7   8   8    8.30    4.90
   8   8  -8   15.20    8.10
  -8   8   8   15.00    6.40
   8   8   8    7.40    5.40
   0   9   8   34.30    4.90
  -1   9   8  111.09    8.00
   1   9  -8  111.09    7.80
  -1   9  -8  138.49    6.90
   1   9   8  135.69    8.40
  -2   9   8  197.58   11.50
   2   9  -8  173.28   10.80
   2   9   8  197.98   11.20
   3   9  -8  113.69    9.10
  -3   9   8  115.89    9.40
   3   9   8  113.49    8.80
  -4   9   8   15.40    4.70
   4   9   8   16.10    4.00
   5   9  -8   46.20    7.70
  -5   9   8   34.00    6.20
   5   9   8   37.70    6.00
  -6   9   8   22.10    5.90
   6   9  -8   21.90    6.80
   6   9   8   23.30    5.60
  -7   9   8   55.69    8.20
   7   9  -8   52.99    9.80
   7   9   8   45.40    7.50
   8   9  -8   -0.10    6.80
  -8   9   8   -4.50    5.40
   0  10   8  158.18   10.00
   0  10  -8  158.28    8.80
  -1  10   8   82.99    7.40
   1  10  -8   92.19    7.10
  -1  10  -8   94.89    6.00
   1  10   8   98.59    7.90
   2  10  -8   60.99    6.20
  -2  10   8   59.99    6.70
  -2  10  -8   61.09    4.60
  -3  10   8    8.10    3.90
   3  10  -8    9.50    4.10
   3  10   8    9.30    4.00
   4  10  -8   47.80    6.90
  -4  10   8   56.79    7.80
   4  10   8   45.70    6.40
  -5  10   8   20.70    5.70
   5  10  -8   30.80    6.50
   5  10   8   24.00    5.50
  -6  10   8   11.80    5.50
   6  10  -8    9.20    6.00
   6  10   8    7.30    5.40
  -7  10   8   11.40    6.70
   7  10   8   15.50    6.40
   0  11  -8  149.99    8.90
   1  11  -8   51.99    5.60
  -1  11   8   49.70    9.70
   1  11   8   59.39    6.90
  -1  11  -8   46.10    4.60
  -2  11   8   53.89    7.40
   2  11  -8   54.19    6.10
   2  11   8   41.50    5.80
  -2  11  -8   38.90    4.50
  -3  11   8   26.40    5.70
   3  11  -8   31.70    6.20
   3  11   8   26.10    4.80
   4  11  -8   15.20    4.60
  -4  11   8    8.90    5.00
   4  11   8   13.40    5.10
   5  11  -8   -0.80    4.80
  -5  11   8    2.40    5.00
   5  11   8    6.20    4.80
  -6  11   8   13.90    5.50
   6  11  -8   26.90    7.30
   6  11   8    4.80    5.10
  -7  11   8    3.90    5.90
   7  11  -8    5.80    6.90
   7  11   8   -1.70    5.50
   0  12   8   57.09    7.10
   0  12  -8   54.29    6.00
   1  12  -8   13.30    3.80
  -1  12   8   14.30    4.30
  -1  12  -8   12.40    3.20
   1  12   8   10.40    3.80
   2  12  -8   67.59    7.00
  -2  12   8   49.70    6.80
  -2  12  -8   43.00    5.20
   2  12   8   61.69    7.90
  -3  12   8   34.90    6.50
   3  12  -8   31.90    5.70
   3  12   8   42.90    6.30
   4  12  -8   11.40    4.80
  -4  12   8   12.60    5.30
   4  12   8   15.10    4.80
  -5  12   8    9.20    5.30
   5  12  -8   24.20    6.40
   5  12   8   32.60    6.80
  -6  12   8    7.30    5.70
   6  12   8   13.90    8.00
   0  13  -8   64.29    6.40
   0  13   8   66.89    8.00
   1  13  -8   12.70    4.10
  -1  13   8   16.70    4.70
   1  13   8   12.10    4.50
  -1  13  -8   19.00    3.90
   2  13  -8   34.30    5.80
  -2  13   8   30.80    6.20
   2  13   8   34.80    6.50
   3  13  -8   13.80    4.60
  -3  13   8    7.40    4.90
  -3  13  -8    1.20    2.70
   3  13   8    4.30    4.80
   4  13  -8   44.00    7.30
  -4  13   8   39.10    7.40
   4  13   8   42.70    7.60
   5  13  -8    7.60    5.90
  -5  13   8    4.30    5.40
   0  14  -8   -3.60    2.90
   0  14   8    2.90    4.40
  -1  14   8   17.50    5.50
   1  14  -8   19.80    4.90
   1  14   8   16.10    5.40
  -1  14  -8   10.30    3.80
   2  14  -8   52.29    7.00
  -2  14   8   51.99    7.80
  -2  14  -8   32.40    5.10
   2  14   8   67.49    8.90
   3  14  -8   18.90    5.50
  -3  14   8   13.60    6.00
   3  14   8    9.00    5.00
   4  14  -8   13.00    5.50
  -4  14   8    6.10    5.90
   4  14   8    3.00    7.40
   0  15   8   13.30    5.20
   0  15  -8    8.90    4.60
  -1  15   8   13.90    5.40
   1  15  -8   20.10    5.00
  -1  15  -8    8.20    4.00
   1  15   8   24.20    6.00
  -2  15   8   -1.10    4.60
   2  15  -8   -2.80    4.00
   2  15   8    0.30    4.70
  -2  15  -8   -8.10    3.70
   3  15  -8   18.10    5.90
  -3  15   8   16.60    6.00
   3  15   8   14.00    6.20
   0  16  -8   -4.90    3.60
   1  16  -8   11.90    4.90
   1  16   8   25.30    6.50
   0   0   9    1.70    1.60
   1   0   9 1313.57   49.00
  -1   0   9 1282.97   49.80
  -2   0   9  547.15   23.50
   2   0   9  540.25   21.20
   3   0   9 1172.68   45.00
  -3   0   9 1227.88   47.50
  -4   0   9   15.20    3.90
   4   0   9   27.90    2.90
   5   0   9   88.49    5.50
  -5   0   9   82.19    7.90
  -6   0   9   27.20    5.30
   6   0   9   29.20    4.10
  -7   0   9  180.18   13.40
   7   0   9  194.48   10.30
   8   0   9    0.70    3.10
  -8   0   9   -0.80    4.80
   9   0   9   -2.70    3.80
  -9   0   9    7.30    6.00
   9   0  -9   -4.10    6.00
   0  -1   9  608.84   24.60
   0   1   9  634.04   24.90
   1  -1   9 1674.13   60.79
  -1   1   9 1632.74   61.89
  -1  -1   9 1599.14   61.69
   1   1   9 1606.04   61.09
   2  -1   9  130.39    5.50
  -2  -1   9  105.19    6.90
   2   1   9  105.59    5.80
  -2   1  -9  104.99    5.20
  -3   1   9  276.67   13.80
   3  -1   9  278.67   11.40
  -3   1  -9  282.67   11.60
  -3  -1   9  283.77   14.00
   3   1   9  283.87   12.00
   4  -1   9  259.77   10.70
  -4   1   9  259.17   13.80
   4   1   9  260.67   11.50
  -4  -1   9  256.87   13.60
   5  -1   9  401.66   15.90
  -5   1   9  391.46   19.40
   5   1   9  390.56   16.70
  -5  -1   9  373.26   19.30
  -6   1   9   14.00    4.60
   6  -1   9   16.70    2.80
  -6  -1   9   11.50    5.00
   6   1   9   14.00    3.00
  -7   1   9   12.50    5.10
   7   1   9   15.10    3.40
  -7  -1   9   21.20    5.50
   8  -1   9   11.20    3.40
  -8   1   9   14.10    5.90
   8   1   9   13.50    3.80
  -8  -1   9   18.80    6.50
   9  -1   9   16.20    4.30
  -9   1   9   33.90    8.40
   9   1  -9   35.40    9.00
   9   1   9   23.50    5.30
  -9  -1   9   39.80    8.70
   0   2   9  269.67   12.20
   0  -2   9  269.87   11.80
  -1   2   9  398.86   17.90
   1  -2   9  393.56   16.60
  -1  -2   9  444.46   17.90
  -1   2  -9  410.46   16.50
   1   2   9  457.75   17.40
  -2   2   9  339.57   15.70
   2  -2   9  349.87   13.90
  -2  -2   9  349.17   15.90
  -2   2  -9  346.07   13.50
   2   2   9  344.27   14.50
  -3   2   9  254.37   13.00
  -3  -2   9  257.47   13.10
   3   2   9  257.57   11.40
   4  -2   9  102.29    4.80
  -4   2   9  103.59    7.80
   4  -2   9  104.89    4.90
   4   2   9   92.49    6.00
  -4  -2   9   96.99    7.90
   5  -2   9  102.89    5.30
  -5   2   9   97.49    8.60
   5   2   9  118.29    7.00
  -5  -2   9  115.69    9.20
  -6   2   9   88.29    8.90
   6  -2   9   81.69    5.10
   6   2   9   94.09    6.70
   7  -2   9   65.69    5.10
  -7   2   9   61.99    8.30
  -7  -2   9   61.19    8.40
   7   2   9   74.99    6.50
  -8   2   9   18.70    6.30
   8   2  -9   12.00    7.00
   8   2   9   19.00    4.50
  -8  -2   9   18.70    6.70
   9   2  -9   -1.50    8.70
  -9   2   9   -7.10    5.30
  -9  -2   9    8.30    6.90
   9   2   9    2.30    4.20
   0  -3   9  233.98   10.60
   0   3   9  244.88   11.20
   1  -3   9   39.40    2.80
   1   3   9   35.00    3.50
  -1   3  -9   37.70    2.50
  -1  -3   9   31.20    3.80
   2  -3   9  446.66   17.00
  -2   3   9  447.46   19.60
   2   3   9  445.86   18.50
  -2   3  -9  453.85   16.80
  -3   3   9  126.79    8.50
  -3  -3   9  141.69    8.70
  -4   3   9   59.79    6.50
  -4  -3   9   69.59    6.70
   4   3   9   57.99    5.00
  -5   3   9   59.99    7.40
   5   3   9   59.69    5.70
  -5  -3   9   60.99    7.40
  -6   3   9   97.69    9.50
   6  -3   9  104.49    5.50
   6  -3   9   99.69    5.00
   6   3   9  102.09    7.50
  -6  -3   9  104.59    9.80
  -7   3   9   38.00    6.90
   7  -3   9   27.80    3.60
   7   3  -9   33.60    7.90
  -7  -3   9   56.49    8.00
   7   3   9   37.10    5.20
  -8   3   9   12.10    5.80
   8  -3   9    3.30    3.30
   8   3  -9    5.70    6.70
  -8  -3   9   11.20    6.10
   8   3   9    5.80    7.10
  -9   3   9   12.40    6.60
   9   3   9    7.00    4.50
   0   4   9  521.55   21.50
   0  -4   9  513.95   20.80
  -1   4   9   88.29    6.20
   1  -4   9   84.99    4.50
  -1  -4   9   83.79    5.60
   1   4   9   90.09    6.00
  -1   4  -9   87.39    4.30
  -2   4   9   19.20    3.60
   2   4   9    9.30    2.20
  -2  -4   9   11.10    2.70
  -3   4   9   71.69    6.50
   3   4   9   73.89    5.50
  -3  -4   9   67.49    6.30
  -4   4   9  231.18   12.80
   4   4   9  233.48   11.50
  -4  -4   9  231.18   13.10
  -5   4   9   23.80    5.10
  -5  -4   9   40.30    6.20
   5   4   9   30.40    4.30
   6   4  -9    2.70    5.00
  -6  -4   9   16.00    4.90
   6   4   9   10.10    3.30
  -7   4   9   10.00    4.80
   7   4  -9    8.50    5.50
   7   4   9    4.50    3.40
  -7  -4   9    2.00    4.60
  -8   4   9   35.80    7.40
   8   4  -9   38.40    9.10
  -8  -4   9   23.80    6.50
   8   4   9   20.50    5.10
  -9   4   9   14.70    6.70
   9   4  -9    2.50    7.80
   9   4   9    1.70    4.70
  -9  -4   9    4.90    6.20
   0   5   9    8.40    2.50
   0   5  -9   12.10    2.30
   0  -5   9   10.80    2.20
  -1   5   9   73.39    5.80
   1   5  -9   74.49    5.40
  -1   5  -9   72.19    3.90
  -1   5  -9   72.19    4.10
  -1  -5   9   77.19    5.50
   1   5   9   73.09    5.40
  -2   5   9  395.46   17.20
   2   5  -9  378.26   17.00
  -2  -5   9  352.06   16.50
   2   5   9  332.27   15.80
  -3   5   9   45.50    5.70
   3   5  -9   35.60    5.40
   3   5   9   47.00    4.80
  -3  -5   9   45.30    5.50
  -4   5   9   65.59    6.90
   4   5  -9   73.59    7.40
   4   5   9   63.59    5.90
  -4  -5   9   54.89    6.60
   5   5  -9   16.10    5.20
  -5   5   9   15.00    4.40
  -5  -5   9   25.60    5.40
   5   5   9   21.20    3.90
   6   5  -9   72.99    9.00
  -6   5   9   88.29   10.20
  -6  -5   9   64.99    8.40
   6   5   9   62.39    6.80
   7   5  -9   20.70    7.20
  -7   5   9   20.20    5.70
  -7  -5   9   18.90    6.00
   7   5   9   21.30    4.90
  -8   5   9   11.30    6.00
   8   5  -9   25.80    8.10
  -8  -5   9    7.90    6.00
   8   5   9    7.40    4.20
   9   5  -9    7.30    8.20
  -9   5   9    5.00    5.80
  -9  -5   9   -4.50    5.50
   9   5   9   -0.70    5.30
   0   6  -9  426.56   17.80
   0   6   9  422.76   18.60
  -1   6   9   64.39    5.50
   1   6  -9   66.09    5.50
  -1   6  -9   64.09    3.90
  -1  -6   9   59.89    5.10
   1   6   9   68.59    5.60
   2   6  -9   52.79    5.70
  -2   6   9   58.29    5.90
   2   6   9   51.99    5.10
  -2  -6   9   48.90    5.20
   3   6  -9   57.49    6.30
  -3   6   9   46.40    5.80
   3   6   9   46.60    5.30
  -3  -6   9   43.90    5.60
   4   6  -9  175.08   11.60
  -4   6   9  173.58   11.10
   4   6   9  165.88    9.80
  -4  -6   9  153.58   10.40
  -5   6   9   42.90    6.50
   5   6   9   43.80    5.80
   6   6  -9   32.70    7.20
  -6   6   9   44.20    7.00
  -6  -6   9   41.10    6.70
  -7   6   9   30.90    6.70
   7   6  -9   32.80    8.20
   7   6   9   23.50    5.20
  -7  -6   9   26.50    6.10
   8   6  -9    9.30    7.50
  -8   6   9   21.70    6.50
  -8  -6   9   19.40    6.70
   8   6   9   17.00    5.30
   0   7  -9    5.80    2.40
   0   7   9    8.50    2.80
  -1   7   9  181.58   10.20
   1   7  -9  185.48   10.40
  -1   7  -9  183.68    8.40
   1   7   9  191.28   10.20
  -2   7   9  300.77   15.10
   2   7  -9  300.27   15.10
  -2  -7   9  301.57   14.80
   2   7   9  295.17   14.40
   3   7  -9   96.39    8.00
  -3   7   9   91.29    7.80
  -3  -7   9   85.69    7.50
   3   7   9   88.29    6.90
   4   7  -9   23.50    5.00
  -4   7   9   32.30    5.70
  -4  -7   9   35.00    5.50
   4   7   9   24.90    4.40
   5   7  -9  100.39   10.30
  -5   7   9  111.39   10.30
  -5  -7   9   90.49    8.70
   5   7   9   94.69    8.50
   6   7  -9   32.30    7.50
  -6   7   9   23.90    5.70
   6   7   9   37.50    5.90
  -6  -7   9   31.90    6.20
  -7   7   9   23.20    6.30
   7   7  -9   28.10    7.70
  -7  -7   9   33.30    7.40
   7   7   9   31.00    5.90
  -8   7   9   18.40    6.60
   8   7   9   17.20    5.90
   0   8   9   20.10    3.90
   0   8  -9   17.50    3.20
   1   8  -9  300.67   14.60
  -1   8   9  292.17   14.90
  -1   8  -9  307.77   13.00
   1   8   9  313.27   14.90
   2   8  -9   34.20    5.20
  -2   8   9   31.90    5.10
   2   8   9   49.60    5.80
  -2   8  -9   31.50    2.80
  -2   8  -9   41.10    2.90
  -3   8   9  281.37   15.20
   3   8  -9  267.27   15.10
   3   8   9  287.87   14.60
  -4   8   9   56.59    7.40
   4   8  -9   56.39    7.80
   4   8   9   64.99    7.20
  -4  -8   9   66.49    7.60
   5   8  -9   35.10    7.10
  -5   8   9   27.40    6.10
  -5  -8   9   29.30    5.90
   5   8   9   43.70    6.10
   6   8  -9   22.60    6.40
  -6   8   9   14.00    5.80
   6   8   9   37.00    6.20
   7   8  -9   23.00    7.70
  -7   8   9   21.20    6.30
   7   8   9   42.10    7.10
   8   8  -9    4.20    7.10
  -8   8   9    6.70    6.30
   8   8   9    2.00    5.40
   0   9   9   48.80    5.80
  -1   9   9  197.68   11.40
   1   9  -9  190.58   10.70
   1   9   9  190.18   11.20
  -1   9  -9  193.18    9.20
   2   9  -9   21.50    4.30
  -2   9   9   25.30    4.90
  -2   9  -9   12.80    2.10
   2   9   9   21.00    3.90
  -3   9   9   94.69    8.50
   3   9  -9  103.59    9.10
   4   9  -9   35.60    6.30
  -4   9   9   30.90    9.40
   4   9   9   44.50    6.40
   5   9  -9   69.59    9.20
  -5   9   9   53.99    7.70
   5   9   9   80.89    8.50
   6   9  -9    0.70    4.90
  -6   9   9   -4.10    4.00
   6   9   9    2.00    4.40
   7   9  -9   14.80    7.10
  -7   9   9    8.90    5.90
   7   9   9   16.20    6.10
   0  10   9   57.59    6.60
   0  10  -9   50.39    4.90
   1  10  -9   96.59    7.40
  -1  10   9   93.09    7.90
   1  10   9  113.19   12.30
  -1  10  -9   94.69    6.10
  -2  10   9   58.69    7.70
   2  10  -9   58.89    6.20
   2  10   9   63.49    6.80
  -2  10  -9   39.60    3.80
  -3  10   9  103.09    9.30
   3  10  -9   95.89    8.70
   3  10   9   94.89    8.60
  -4  10   9   35.10    6.30
   4  10  -9   37.20    6.50
   4  10   9   37.30    6.20
  -5  10   9   11.20    5.20
   5  10  -9   25.00    6.30
   5  10   9   21.40    5.30
  -6  10   9   -0.20    4.50
   6  10  -9    7.20    6.00
   6  10   9   14.50    5.40
  -7  10   9   25.50    7.40
   7  10  -9   28.20    9.60
   7  10   9   22.90    7.40
   0  11   9   50.09    6.70
   0  11  -9   42.30    5.30
  -1  11   9   77.99    7.70
   1  11  -9   66.89    6.70
   1  11   9   92.19    8.20
   2  11  -9   55.49    6.70
  -2  11   9   42.90    6.10
  -2  11  -9   30.00    3.60
   2  11   9   51.29    6.50
  -3  11   9   61.29    7.90
   3  11  -9   76.49    8.00
   3  11   9   85.99    8.70
  -4  11   9   39.00    7.00
   4  11  -9   42.90    7.10
   4  11   9   42.10    6.60
   5  11  -9   64.29    9.30
  -5  11   9   59.49    8.70
   5  11   9   78.99    9.70
  -6  11   9   -0.50    5.20
   6  11  -9    8.20    6.40
   6  11   9   13.90    6.20
   0  12   9   44.80    6.30
   0  12  -9   39.40    5.10
   1  12  -9   52.79    6.40
  -1  12   9   54.19    7.30
  -1  12  -9   54.99    5.40
   1  12   9   68.79    7.90
   2  12  -9   30.30    6.30
  -2  12   9   28.90    6.00
   2  12   9   34.40    6.20
  -2  12  -9   18.80    3.50
  -3  12   9   54.89    8.00
   3  12  -9   50.49    6.80
   3  12   9   57.39    7.90
  -3  12  -9   43.00    4.80
   4  12  -9   33.10    6.70
  -4  12   9   16.70    6.10
   4  12   9   19.00    5.70
  -5  12   9   30.90    7.20
   5  12  -9   22.40    6.60
   5  12   9   29.30    6.90
  -6  12   9   -0.80    5.60
   6  12  -9   15.40    7.00
   6  12   9   12.50    5.90
   0  13  -9   11.50    3.80
   0  13   9   14.20    4.50
   1  13  -9   41.30    5.70
  -1  13   9   41.90    6.90
   1  13   9   30.60    6.20
  -1  13  -9   42.80    5.70
  -2  13   9   62.09    8.20
   2  13  -9   60.29    7.60
   2  13   9   50.29    7.40
   3  13  -9   24.10    5.40
  -3  13   9   11.40    5.20
   3  13   9   21.40    5.90
  -4  13   9   10.40    6.20
   4  13  -9    2.70    5.40
   4  13   9    7.10    5.60
   5  13  -9   10.00    6.40
  -5  13   9    3.00    6.00
   5  13   9   13.00    5.80
   0  14   9   82.79    9.40
   0  14  -9   62.39    7.10
  -1  14   9    6.30    4.50
   1  14  -9    5.80    4.00
  -1  14  -9   -0.80    3.10
   1  14   9    6.00    4.90
  -2  14   9    7.20    4.90
   2  14  -9    4.40    4.20
   2  14   9    3.30    4.90
   3  14  -9    9.30    5.10
  -3  14   9    9.20    5.50
   3  14   9   11.50    5.50
  -4  14   9   48.80    8.50
   4  14  -9   51.89    8.40
   4  14   9   35.70    7.30
   0  15   9    1.20    4.70
  -1  15   9   15.70    5.80
   1  15  -9   11.40    4.50
  -1  15  -9    4.10    4.00
   1  15   9   22.00    6.20
   2  15  -9   32.50    6.30
   2  15   9   29.30    9.40
  -3  15   9    2.10    5.60
   3  15  -9   14.00    5.80
   3  15   9   11.10    6.00
   0  16   9   34.00    6.80
   0  16  -9    6.60    4.80
   1  16  -9    6.00    4.70
  -1  16   9    6.20    5.70
  -1  16  -9    1.10    4.50
   1  16   9    7.10    5.30
   0   0  10 2399.76   89.59
   1   0  10 1448.26   53.89
  -1   0  10 1405.16   54.69
   2   0  10   56.39    3.80
  -2   0  10   51.99    5.10
  -3   0  10  189.78   10.70
   3   0  10  193.18    8.60
   4   0  10  107.19    5.80
  -4   0  10  106.19    8.40
  -5   0  10  418.96   20.60
   5   0  10  410.56   17.10
   6   0  10    2.70    2.70
  -6   0  10    9.20    4.60
  -7   0  10   55.99    8.40
   7   0  10   61.99    6.00
  -8   0  10    8.20    5.80
   8   0  10   -0.50    3.20
  -9   0  10   81.69   14.50
   9   0  10   57.59    7.40
   0  -1  10   -0.60    1.70
   0   1  10    1.80    1.70
  -1   1  10  760.52   29.60
   1  -1  10  743.23   28.40
  -1  -1  10  714.13   29.30
   1   1  10  706.13   28.60
  -2   1  10  458.35   19.80
   2  -1  10  454.15   17.90
  -2  -1  10  456.85   19.80
   2   1  10  431.06   18.20
   3  -1  10  805.02   30.30
  -3   1  10  810.92   33.20
  -3  -1  10  796.42   33.10
   3   1  10  779.92   30.90
   4  -1  10   41.50    3.20
  -4   1  10   38.40    5.30
  -4  -1  10   31.20    5.00
   4   1  10   45.20    3.90
   5  -1  10   84.99    5.20
  -5   1  10   90.09    8.60
  -5  -1  10   92.29    8.60
   5   1  10   98.79    6.80
   6  -1  10   43.10    4.10
  -6   1  10   37.40    8.70
   6   1  10   37.30    4.90
  -6  -1  10   46.30    6.90
   7  -1  10  113.69    8.60
  -7   1  10  138.49   11.70
  -7  -1  10  127.69   11.50
   7   1  10  122.69    8.40
  -8   1  10   18.60    6.60
   8  -1  10   18.80    3.90
  -8  -1  10   24.30    7.40
   8   1  10   21.90    4.20
  -9   1  10    1.20    6.60
   9   1  10   -3.50    3.80
   0   2  10   90.29    5.80
   0  -2  10   86.59    5.40
   1  -2  10  240.48   10.40
  -1   2  10  254.27   15.20
   1   2  10  243.68   11.10
  -1  -2  10  229.48   11.40
   2  -2  10  218.18    9.40
  -2   2  10  224.48   11.60
  -2  -2  10  236.88   11.60
   2   2  10  229.98   10.40
  -2   2 -10  218.98    9.30
  -3   2  10  311.47   14.90
   3  -2  10  268.07   12.20
   3   2  10  306.37   13.00
  -3   2 -10  299.17   12.00
  -3  -2  10  294.47   14.70
   4  -2  10   94.59    4.60
   4  -2  10   90.19    4.50
  -4   2  10  100.69    8.10
  -4  -2  10   89.99    7.40
   5  -2  10  152.88    7.70
  -5   2  10  159.98   11.10
   5  -2  10  153.38    6.90
   5   2  10  161.98    8.70
  -5  -2  10  144.89   10.90
  -6   2  10   95.39   10.50
   6  -2  10   82.79    5.10
  -6  -2  10   99.69    9.70
   6   2  10  101.29    7.20
  -7   2  10    5.90    4.90
   7   2  10   11.10    3.70
  -7  -2  10    9.50    4.80
  -8   2  10   13.40    6.00
   8  -2  10    3.90    3.30
   8   2 -10    0.30    6.50
  -8  -2  10   15.40    6.30
   8   2  10   14.10    4.00
  -9   2  10   18.30    7.90
   9   2 -10   18.00    9.00
  -9  -2  10   11.40    8.60
   9   2  10    5.40    4.90
   0   3  10  616.24   28.80
   0  -3  10  618.04   24.60
  -1   3  10  226.68   11.40
   1  -3  10  224.08    9.90
  -1  -3  10  228.58   11.00
   1   3  10  238.48   11.60
  -2   3  10   94.79    7.00
  -2  -3  10   92.49    6.60
  -3   3  10   60.39    6.30
  -3  -3  10   71.49    6.40
   3   3  10   77.69    5.30
  -4   3  10  255.37   14.10
   4   3  10  248.38   12.10
  -4  -3  10  263.47   14.00
  -5   3  10   41.30    6.30
  -5  -3  10   49.40    6.50
   5   3  10   55.59    5.20
  -6   3  10    9.00    4.50
   6   3  10    5.50    2.80
  -6  -3  10    2.50    3.40
   7  -3  10    4.20    1.90
  -7   3  10   22.30    6.10
   7   3 -10    7.40    5.70
   7   3  10   11.50    3.80
  -7  -3  10   10.60    5.00
  -8   3  10   35.90    7.50
   8   3 -10   42.70    9.50
   8   3  10   36.10    8.70
  -8  -3  10   43.50    8.30
  -9   3  10   -5.50    6.90
   9   3 -10    0.20    7.30
  -9  -3  10   11.00    6.80
   9   3  10   10.00    4.60
   0  -4  10   28.00    3.40
   0   4  10   35.50    4.20
   1  -4  10  191.98    8.60
  -1   4  10  206.38   10.50
  -1  -4  10  208.58   10.00
  -1   4 -10  177.08    8.50
   1   4  10  188.38    9.70
  -2   4  10  718.03   28.80
   2   4  10  655.33   27.30
  -2  -4  10  670.23   28.20
  -3   4  10   67.39    6.70
   3   4  10   72.89    5.60
  -3  -4  10   68.89    6.50
  -4   4  10   33.80    5.30
  -4  -4  10   27.40    4.80
   4   4  10   45.10    4.80
  -5   4  10   12.80    4.50
  -5  -4  10   21.40    5.20
   5   4  10   24.60    3.90
  -6   4  10  110.69   10.20
   6   4 -10   98.59   10.80
   6   4  10  107.69    7.80
  -6  -4  10   86.59    9.70
  -7   4  10   17.50    5.60
   7   4 -10   22.50    7.40
  -7  -4  10   18.90    6.30
   7   4  10   25.60    4.90
   8   4 -10    6.20    6.60
  -8   4  10    3.00    5.60
  -8  -4  10    5.00    5.90
   8   4  10    5.40    4.10
   9   4 -10   16.30    9.10
  -9  -4  10   -1.60    6.00
   9   4  10   -3.10    4.60
   0   5  10  880.11   35.70
   0   5 -10  910.81   35.00
   0  -5  10  898.71   35.00
  -1   5  10   70.19    6.00
   1  -5  10   64.19    4.00
   1   5  10   64.69    5.40
  -1   5 -10   68.79    4.10
  -1  -5  10   63.49    5.20
  -2   5  10   78.09    6.60
   2   5  10   67.19    5.60
  -2  -5  10   72.29    6.30
   3   5 -10   66.59    6.70
  -3   5  10   60.49    6.60
  -3  -5  10   62.19    6.50
   3   5  10   69.39    5.70
  -4   5  10  350.86   17.90
   4   5 -10  408.46   19.10
  -4  -5  10  343.87   17.90
   4   5  10  331.87   16.20
   5   5 -10   41.40   10.30
  -5   5  10   34.70    6.00
  -5  -5  10   42.30    9.80
   5   5  10   42.60    5.40
   6   5 -10   27.30    6.80
  -6   5  10   37.10    7.10
   6   5  10   33.40    4.90
  -6  -5  10   44.50    7.50
  -7   5  10    9.60    5.50
   7   5 -10    4.20    6.00
   7   5  10    5.10    3.80
  -7  -5  10    2.00    4.80
  -8   5  10   28.00    7.70
   8   5 -10   31.70    9.30
   8   5  10   27.40    5.50
  -8  -5  10   20.60    7.10
   0   6  10  113.69    7.60
   0  -6  10  111.39    6.70
   0   6 -10  120.59    6.90
  -1   6  10  136.09    9.10
   1   6  10  157.48    8.90
  -1  -6  10  169.78    9.80
  -1   6 -10  153.68    7.30
   2   6 -10  595.34   25.60
  -2   6  10  613.64   25.90
   2   6  10  569.84   24.70
  -2  -6  10  577.44   25.20
  -3   6  10   57.09    6.60
   3   6 -10   65.59    7.00
   3   6  10   55.99    5.70
  -3  -6  10   63.19    6.50
  -4   6  10   50.09    6.60
   4   6 -10   56.59    7.10
  -4  -6  10   60.49    7.10
   4   6  10   59.49    6.10
   5   6 -10   14.80    4.90
  -5   6  10   39.90   11.10
   5   6  10   23.10    4.50
  -5  -6  10   25.80    5.60
   6   6 -10  118.69   11.80
  -6   6  10   95.89   10.10
   6   6  10  104.89    9.60
  -6  -6  10   78.69    9.60
   7   6 -10   27.90    7.80
  -7   6  10   29.40    6.80
  -7  -6  10   12.70    5.50
   7   6  10   29.90    5.40
  -8   6  10   10.90    6.10
   8   6  10    4.40    4.90
   0   7 -10  385.26   16.70
   0   7  10  383.06   17.70
   1   7 -10  183.38    9.90
  -1   7  10  181.58   10.10
   1   7  10  164.18    9.80
  -1  -7  10  164.98    9.50
  -1   7 -10  158.38    7.90
   2   7 -10   43.10    5.70
  -2   7  10   58.39    6.30
  -2  -7  10   47.70    5.60
   2   7  10   47.10    5.40
   3   7 -10  157.58   10.60
  -3   7  10  160.98   10.70
   3   7  10  155.78    9.60
  -3  -7  10  151.08   10.10
   4   7 -10  183.08   12.60
  -4   7  10  182.98   12.20
   4   7  10  189.58   11.20
  -4  -7  10  182.08   11.90
   5   7 -10   48.00    7.40
  -5   7  10   67.79    8.00
  -5  -7  10   66.89    8.50
   6   7 -10    8.90    5.90
  -6   7  10    6.20    5.00
  -6  -7  10    4.50    4.60
   6   7  10   13.20    4.30
   7   7 -10   19.50    8.00
  -7   7  10   29.50    7.30
   7   7  10   15.50    5.20
  -7  -7  10   24.80    6.80
   8   7 -10   11.30    8.20
  -8   7  10   13.30    6.80
  -8  -7  10   17.20    6.60
   8   7  10    9.90    5.20
   0   8  10    7.30    3.20
   0   8 -10    3.90    2.40
   1   8 -10  152.98    9.00
  -1   8  10  152.28    9.50
  -1   8 -10  139.49    7.20
   1   8  10  131.29    8.80
  -2   8  10   47.60    6.00
   2   8 -10   51.69    6.40
   2   8  10   60.39    6.30
   3   8 -10  226.68   13.80
  -3   8  10  243.08   13.80
  -3  -8  10  232.78   13.40
   3   8  10  239.58   13.10
   4   8 -10   35.80    9.70
   4   8  10   52.09   10.90
  -4  -8  10   55.89   10.30
   5   8 -10  103.79   10.80
  -5   8  10  103.09    9.90
   5   8  10  115.39    9.30
  -5  -8  10  112.49   10.20
  -6   8  10   16.90    6.40
   6   8 -10   21.00    6.70
   6   8  10   35.00    5.80
  -6  -8  10   35.70    7.10
  -7   8  10    9.70    6.60
   7   8 -10    1.80    6.20
   7   8  10    2.70    4.70
  -8   8  10    1.50    6.20
   8   8 -10   -0.30    7.10
   8   8  10    2.40    5.60
   0   9 -10    1.60    3.00
   0   9  10    3.80    2.90
   1   9 -10  172.08   10.40
  -1   9  10  171.48   11.10
   1   9  10  190.38   11.20
  -1   9 -10  197.58    9.00
  -2   9  10    7.30    3.50
   2   9 -10    5.00    3.40
   2   9  10   12.20    4.00
  -2   9 -10    1.40    1.40
  -2   9 -10    6.30    1.80
   3   9 -10   44.50    6.70
   3   9  10   66.19    7.20
   4   9 -10   10.80    5.10
  -4   9  10   12.50    4.90
   4   9  10   11.60    4.40
   5   9 -10   77.49    9.50
  -5   9  10   74.79    9.40
   5   9  10   73.09    8.50
   6   9 -10   30.10    8.00
  -6   9  10   16.40    5.70
   6   9  10   23.70    5.80
  -7   9  10   34.10    8.00
   7   9  10   36.10    6.70
   0  10  10   38.80    7.10
   0  10 -10   31.50    4.20
  -1  10  10  164.98   11.40
   1  10 -10  149.29    9.60
  -1  10 -10  152.48    8.10
   2  10 -10   15.70    4.10
  -2  10  10   13.90    4.40
   2  10  10   11.80    4.00
  -3  10  10   71.99    8.30
   3  10 -10   60.29    8.40
   3  10  10   62.79    7.80
  -4  10  10    8.30    4.30
   4  10 -10    7.50    4.70
   4  10  10    8.40    4.60
  -5  10  10   19.80    6.00
   5  10 -10   33.70    7.00
  -6  10  10    7.30    6.20
   6  10 -10   17.10    6.80
   6  10  10    7.10    5.30
   7  10 -10   14.20    7.40
  -7  10  10   23.60    6.80
   0  11 -10    1.80    2.70
   0  11  10    7.60    3.80
   1  11 -10  140.69    9.00
  -1  11  10  126.19    9.90
   1  11  10  126.59   10.10
  -2  11  10   14.50    4.60
   2  11 -10   22.80    4.50
   2  11  10   20.60    5.20
   3  11 -10  123.39   10.00
  -3  11  10  105.99   10.10
   3  11  10  123.19   10.40
  -4  11  10   15.30    5.50
   4  11 -10   20.70    5.70
   4  11  10   16.40    5.10
  -5  11  10   15.70    6.30
   5  11 -10   21.30    6.50
   5  11  10   27.20    6.30
   6  11 -10    6.00    6.60
  -6  11  10    2.20    5.70
   6  11  10   11.20    6.00
   0  12  10   12.50    4.30
   0  12 -10   13.10    3.50
  -1  12  10   80.29    8.60
   1  12 -10   69.89    7.00
   1  12  10   67.39    8.40
  -1  12 -10   76.29    6.20
  -2  12  10    8.40    4.50
   2  12  10   10.70    4.70
  -2  12 -10    2.70    2.70
   3  12 -10   43.80    6.80
  -3  12  10   46.90    7.30
   3  12  10   36.50    6.90
   4  12 -10    4.50    4.80
  -4  12  10    6.30    5.50
   4  12  10    1.50    4.70
   5  12 -10   26.60    6.60
  -5  12  10   33.10    7.60
   5  12  10   30.90    7.00
  -6  12  10   20.10    7.20
   6  12 -10   21.90    7.60
   6  12  10   18.40    6.60
   0  13  10   57.09    7.80
   0  13 -10   58.69    6.50
  -1  13  10   10.70    4.80
   1  13 -10   14.20    4.40
  -1  13 -10   14.20    3.80
   1  13  10   22.70    5.80
  -2  13  10    2.20    4.10
   2  13 -10   -5.80    3.20
   2  13  10   -1.00    4.40
  -3  13  10   17.00    6.00
   3  13 -10   18.60    5.10
   3  13  10   23.00    6.20
  -4  13  10   36.50    7.50
   4  13 -10   31.40    6.70
   4  13  10   35.30    8.30
  -5  13  10    6.90    6.30
   5  13  10   15.50    6.10
   0  14  10    2.80    4.40
   0  14 -10   -0.30    3.20
  -1  14  10    7.30    5.00
   1  14 -10    0.00    3.60
   1  14  10    2.90    4.70
  -1  14 -10   -7.10    3.00
  -2  14  10   78.69    9.90
   2  14 -10   62.29    8.20
   2  14  10   47.70    7.60
  -3  14  10    5.80    5.50
   3  14 -10    4.80    4.90
  -4  14  10   12.00    6.70
   4  14 -10    4.70    5.90
   4  14  10    7.40    5.90
   0  15  10   28.60    8.80
   1  15 -10    8.80    4.40
  -1  15  10    5.60    5.50
  -1  15 -10   -2.90    3.70
   2  15 -10    2.30    4.20
  -2  15  10    8.00    7.00
   2  15  10    1.80    5.20
   3  15 -10    7.40    5.30
   3  15  10   12.80    6.20
   0   0  11    4.10    2.00
  -1   0  11  329.97   15.70
   1   0  11  322.77   14.00
  -2   0  11  123.99    8.00
   2   0  11  122.29    6.50
   3   0  11  655.73   26.10
  -3   0  11  686.03   28.80
   4   0  11   13.10    2.30
  -4   0  11   14.20    4.30
   5   0  11   37.20    4.10
  -5   0  11   44.90    6.50
  -6   0  11    3.80    4.50
   6   0  11    3.40    2.90
  -7   0  11  158.28   12.90
   7   0  11  161.88    9.00
  -8   0  11    1.00    4.90
   8   0  11   -8.50    3.00
  -9   0  11    5.10    6.70
   9   0  11  -13.00    5.80
   0   1  11    0.10    1.60
   0  -1  11   -0.90    1.60
   1  -1  11  392.36   16.30
  -1   1  11  393.36   17.50
  -1  -1  11  396.46   17.30
   1   1  11  389.86   16.60
   2  -1  11  244.78   10.60
  -2   1  11  243.58   12.40
  -2  -1  11  245.08   12.40
   2   1  11  240.98   11.00
   3  -1  11  143.19    6.80
  -3   1  11  133.79    9.30
  -3  -1  11  141.99    9.30
   3   1  11  153.18    7.50
   4  -1  11   53.29    3.60
  -4   1  11   52.99    6.60
   4   1  11   50.89    4.40
  -4  -1  11   49.00    6.30
   5  -1  11  304.37   12.60
  -5   1  11  304.17   16.50
  -5  -1  11  278.97   16.20
   6  -1  11   41.40    4.10
  -6   1  11   37.00    6.40
  -6  -1  11   47.70    7.10
   6   1  11   56.69    5.40
  -7   1  11   10.30    5.20
   7  -1  11    3.80    2.60
   7   1  11   13.60    3.60
  -7  -1  11   17.20    5.70
   8  -1  11   -1.00    3.30
  -8   1  11   -3.40    5.80
   8   1  11   -7.80    3.10
  -8  -1  11    5.40    5.60
  -9   1  11   22.00    8.20
   9   1 -11   23.80    8.70
   9   1  11   20.50    5.00
  -9  -1  11   33.40    9.00
   0  -2  11  629.64   25.40
   1  -2  11  125.19    6.70
  -1   2  11  119.59    7.80
  -1  -2  11  141.19    8.00
   1   2  11  149.99    7.60
  -2   2  11    3.50    2.40
   2  -2  11    7.60    1.70
  -2   2 -11    1.40    1.90
   2   2  11    5.70    2.00
  -2  -2  11    6.40    2.80
  -3   2  11  147.99    9.70
   3  -2  11  151.38    6.90
  -3  -2  11  160.68    9.90
  -3   2 -11  164.48    6.90
   3   2  11  158.28    8.30
   4  -2  11  286.27   11.80
   4  -2  11  290.67   11.90
  -4   2  11  275.07   15.50
  -4  -2  11  321.27   15.90
   4   2  11  308.27   13.40
   5  -2  11   11.00    1.80
   5  -2  11   13.50    1.80
  -5   2  11   12.30    4.80
   5   2  11   20.50    3.40
  -5  -2  11   17.50    5.00
  -6   2  11   10.90    5.10
   6  -2  11   13.20    2.20
  -6  -2  11    8.20    4.40
   6   2  11   14.80    3.30
   7  -2  11   22.50    2.80
  -7   2  11   28.80    6.60
   7   2  11   27.30    4.20
  -7  -2  11   19.90    5.70
  -8   2  11   30.40    7.60
  -8  -2  11   58.19    9.20
   8   2  11   39.70    5.50
  -9   2  11    3.80    7.30
   9   2 -11    1.60    7.00
   9   2  11  -10.00    4.60
  -9  -2  11   -1.00    6.10
   0   3  11   67.09    5.50
   0  -3  11   67.79    4.90
  -1   3  11   62.79    5.70
   1  -3  11   67.39    4.50
  -1  -3  11   77.99    5.50
   1   3  11   77.09    5.40
  -2   3  11  516.45   23.00
   2  -3  11  521.05   20.40
   2   3  11  527.85   21.70
  -2  -3  11  541.35   22.90
  -3   3  11   28.40    4.70
   3   3  11   28.60    3.60
  -3  -3  11   26.10    4.30
  -4   3  11    7.80    3.90
   4   3  11   11.70    2.90
  -4  -3  11   14.70    4.00
  -5   3  11    7.60    4.40
  -5  -3  11   15.90    4.40
   5   3  11   17.80    3.50
  -6   3  11  147.69   12.00
   6   3  11  169.28    9.70
  -6  -3  11  150.68   11.60
  -7   3  11   11.90    5.40
   7   3  11   13.10    4.00
  -7  -3  11   13.00    5.90
   8   3 -11   16.90    7.30
  -8   3  11   14.80    6.30
   8   3  11    1.60    6.20
  -8  -3  11    6.80    6.10
  -9   3  11    8.30    7.70
   9   3 -11    3.10    8.00
   9   3  11   -4.10    4.30
  -9  -3  11   12.80    7.10
   0  -4  11  874.61   33.70
   0   4  11  838.92   34.30
   1  -4  11   35.20    3.20
  -1   4  11   33.30    4.40
   1   4  11   33.30    4.20
  -1  -4  11   33.30    4.00
   2  -4  11   21.20    2.20
  -2   4  11   18.40    4.00
   2   4  11   19.70    3.30
  -2  -4  11   20.20    3.80
  -3   4  11   19.80    4.60
   3   4  11   31.20    4.20
  -3  -4  11   31.50    5.00
  -4   4  11  416.66   20.20
  -4  -4  11  396.26   19.80
   4   4  11  403.46   17.90
  -5   4  11   17.10    5.30
  -5  -4  11   17.50    8.80
   5   4  11   14.80    3.40
   6   4 -11   16.80    6.00
  -6   4  11   26.90    6.20
  -6  -4  11   30.10    6.60
   6   4  11   29.00    4.60
   7   4 -11    8.80    6.50
  -7   4  11    1.50    4.80
   7   4  11   10.40    3.90
  -7  -4  11   11.90    5.70
  -8   4  11   47.50    8.20
   8   4 -11   54.89   10.40
   8   4  11   45.00    6.30
  -8  -4  11   44.40    8.60
   0  -5  11   -3.10    1.80
   0   5  11    0.40    2.20
   1  -5  11   30.80    3.20
  -1   5  11   25.10    4.10
   1   5  11   29.00    4.10
  -1   5 -11   31.50    3.10
  -1  -5  11   33.80    4.70
  -2   5  11 1167.28   46.60
   2   5  11 1147.89   45.40
  -2  -5  11 1165.48   46.20
  -3   5  11   25.80    4.80
  -3  -5  11   23.20    4.60
   3   5  11   24.90    3.80
   4   5 -11   55.29    7.00
  -4   5  11   44.20    6.70
  -4  -5  11   49.60    6.80
   4   5  11   63.79    6.10
   5   5 -11    4.00    4.70
  -5  -5  11   11.90    4.60
   5   5  11   10.70    3.50
   6   5 -11  188.48   14.20
  -6   5  11  173.38   13.10
  -6  -5  11  135.19   12.00
   6   5  11  148.29    9.90
   7   5 -11   -3.80    5.90
  -7   5  11    0.50    4.50
   7   5  11    6.30    4.10
  -7  -5  11    9.10    5.50
   8   5 -11    4.60   10.10
  -8   5  11    3.70    6.00
  -8  -5  11    2.20    7.00
   8   5  11    4.70    4.40
   0   6  11 1667.23   65.69
   0  -6  11 1709.53   64.69
   0   6 -11 1743.33   64.89
  -1   6  11  131.99    8.90
   1   6 -11  132.99    8.40
  -1  -6  11  135.79    8.30
   1   6  11  122.49    8.00
  -1   6 -11  127.69    6.60
  -2   6  11  115.99    8.40
   2   6 -11  114.29    8.50
  -2  -6  11  106.19    7.90
   2   6  11  119.99    7.90
  -3   6  11   49.30    6.60
   3   6 -11   36.30    5.60
  -3  -6  11   56.89    6.50
   3   6  11   51.69    5.60
   4   6 -11  368.66   19.00
  -4   6  11  351.76   18.30
  -4  -6  11  333.57   18.00
   4   6  11  347.87   16.70
  -5   6  11   28.00    6.00
   5   6 -11   21.40    6.10
  -5  -6  11   21.10    5.60
   5   6  11   28.40    4.70
   6   6 -11    3.80    5.30
  -6   6  11    4.30    5.00
  -6  -6  11    5.10    4.70
   6   6  11    3.90    3.40
  -7   6  11   13.60    6.00
   7   6 -11   16.80    7.40
   7   6  11   12.00    4.80
  -7  -6  11   10.60    5.30
  -8   6  11   15.20    6.70
   8   6 -11   20.70    9.10
  -8  -6  11   18.60    8.10
   8   6  11   23.50    6.30
   0   7 -11   58.99    5.40
   0   7  11   64.89    6.40
  -1   7  11  207.48   11.90
   1   7 -11  205.78   11.40
   1   7  11  205.28   11.20
  -1  -7  11  213.88   11.20
  -1   7 -11  210.78    9.60
  -2   7  11  420.16   20.20
   2   7 -11  432.96   20.20
   2   7  11  436.76   19.60
  -2  -7  11  428.66   19.90
   3   7 -11   61.09    7.50
  -3   7  11   69.79    7.60
  -3  -7  11   74.09    7.20
   3   7  11   68.59    6.50
   4   7 -11    7.50    4.60
  -4  -7  11    4.70    3.70
   4   7  11    6.50    3.30
   5   7 -11   41.70    6.90
  -5   7  11   47.10    7.20
  -5  -7  11   57.89    8.00
   5   7  11   51.39    6.80
  -6   7  11   50.89    8.10
   6   7 -11   51.99    8.80
   6   7  11   68.39    7.60
  -6  -7  11   75.39    9.80
  -7   7  11    3.20    5.90
   7   7 -11   10.20    7.30
   7   7  11    9.10    4.60
  -7  -7  11   13.20    6.10
   8   7 -11    0.90    7.50
  -8   7  11   -0.50    6.30
  -8  -7  11    1.70    5.70
   8   7  11   -5.70    4.90
   0   8 -11   24.20    3.70
   0   8  11   33.30    5.10
   1   8 -11  234.38   12.70
  -1   8  11  222.08   13.20
   1   8  11  256.77   13.20
  -1   8 -11  257.47   11.00
   2   8 -11   14.70    4.20
  -2   8  11   15.80    4.50
  -2  -8  11   19.00    4.20
   2   8  11   21.00    4.20
  -3   8  11  155.18   13.20
   3   8 -11  159.48   11.30
  -3  -8  11  166.28   10.90
   3   8  11  164.58   10.70
   4   8 -11   81.69    9.70
  -4   8  11   74.39    8.80
   4   8  11   91.69    8.20
  -4  -8  11   92.99    9.90
  -5   8  11   14.60    5.40
   5   8 -11   17.30    5.80
  -5  -8  11   21.20    5.80
   5   8  11   19.20    4.80
   6   8 -11    0.70    6.00
  -6   8  11   -8.40    3.90
  -6  -8  11    7.20    5.50
   6   8  11    0.80    3.70
   7   8 -11   16.30    7.50
  -7   8  11   22.30    7.40
  -7  -8  11   28.40    7.60
   7   8  11   22.50    5.90
   0   9  11    3.50    2.90
   0   9 -11    1.90    2.30
   1   9 -11  197.58   11.00
  -1   9  11  187.48   12.00
  -1   9 -11  184.98    9.10
   1   9  11  189.48   12.30
  -2   9  11   11.30    6.50
   2   9 -11    6.70    3.60
  -2   9 -11    6.10    2.00
   2   9  11    5.50    3.80
   3   9 -11   62.89    8.00
  -3   9  11   49.30    6.80
   3   9  11   77.59    7.90
   4   9 -11   24.60    6.00
  -4   9  11   21.10    5.70
   4   9  11   32.90    5.60
  -5   9  11   35.40    7.10
   5   9 -11   29.00    6.90
   5   9  11   30.60    5.50
   6   9 -11    6.50    6.00
  -6   9  11    6.90    6.00
   6   9  11   10.50    4.90
  -7   9  11    3.60    6.20
   7   9 -11    9.40    8.10
   7   9  11   15.30    5.70
   0  10 -11    0.10    2.40
   0  10  11    4.00    3.80
   1  10 -11  142.79    9.00
  -1  10  11  143.79   10.10
   1  10  11  119.39    9.30
  -1  10 -11  125.29    7.40
  -2  10  11   15.60    4.50
   2  10 -11   22.10    4.50
   2  10  11   28.50    5.20
  -3  10  11   82.59    8.90
   3  10  11   75.49    7.80
   4  10 -11   -2.90    4.10
  -4  10  11   -1.70    4.40
   4  10  11    3.20    4.00
   5  10 -11   17.10    6.50
  -5  10  11   28.10    6.90
   5  10  11   16.70    5.40
  -6  10  11    5.30    6.20
   6  10 -11   17.80    7.50
   6  10  11   22.90    6.20
   7  10 -11   16.40    8.20
  -7  10  11    9.50    6.90
   7  10  11   18.10    7.70
   0  11  11    5.50    3.70
   0  11 -11    1.70    2.60
   1  11 -11   50.89    6.20
  -1  11  11   41.20    6.50
  -1  11 -11   58.59    7.50
   1  11  11   48.40    6.70
   2  11 -11   19.50    4.50
  -2  11  11   13.80    5.10
   2  11  11   17.10    5.00
   3  11 -11   81.09    9.00
  -3  11  11   75.39    9.10
   3  11  11   79.09    8.90
   4  11 -11   32.90    6.40
  -4  11  11   25.90    6.80
   4  11  11   37.50    6.90
  -5  11  11   40.30    7.90
   5  11 -11   54.19    8.90
   5  11  11   38.60    6.90
  -6  11  11   -2.60    5.50
   0  12 -11   50.79    5.90
   0  12  11   53.59    7.10
   1  12 -11   25.20    4.60
  -1  12  11   22.40    5.10
   1  12  11   18.60    5.20
  -1  12 -11   13.30    3.30
  -2  12  11    1.30    4.30
   2  12 -11    2.00    3.80
   2  12  11    2.90    4.40
  -2  12 -11   -4.40    2.30
  -3  12  11   26.00    6.40
   3  12 -11   31.80    6.20
   3  12  11   43.80    7.10
  -4  12  11   15.80    6.20
   4  12 -11   20.70    6.10
   4  12  11   25.00    6.20
  -5  12  11   11.30    6.20
   5  12 -11   14.50    7.00
   5  12  11   22.30    9.70
   0  13 -11    0.80    2.90
   0  13  11   -0.20    3.90
   1  13 -11    5.50    3.80
  -1  13  11    7.20    5.00
  -1  13 -11    3.20    3.00
   1  13  11   15.90    5.40
   2  13 -11   52.89    7.00
  -2  13  11   36.90    6.90
  -2  13 -11   32.20    5.80
   2  13  11   45.60    7.00
   3  13 -11   -1.80    4.10
  -3  13  11   -2.90    4.50
   3  13  11    3.60    5.30
  -4  13  11    5.00    5.50
   4  13 -11    4.50    5.30
   5  13 -11    4.00    9.60
   5  13  11    1.20    6.00
   0  14  11   43.70    7.50
   0  14 -11   37.10    5.50
   1  14 -11   -0.90    3.60
  -1  14  11   -2.70    4.50
   1  14  11    3.50    4.30
  -2  14  11    5.20    4.70
   2  14 -11   -2.60    3.80
   2  14  11    4.70    6.40
  -3  14  11   11.00    6.30
   3  14 -11   -1.40    4.50
   3  14  11    9.90    6.10
   0  15  11    4.20    5.80
   1  15 -11   10.30    4.90
  -1  15  11    2.70    5.80
  -1  15 -11   -3.70    4.60
   1  15  11    8.50    5.00
   2  15 -11   17.60    5.70
  -2  15  11   37.20    8.40
   2  15  11   26.60    6.70
   0   0  12   -1.10    1.60
  -1   0  12  221.98   11.30
   1   0  12  219.38   10.40
   2   0  12   37.00    3.70
  -2   0  12   42.60    5.20
  -3   0  12   47.60    6.20
  -4   0  12    0.00    3.30
   4   0  12   -0.70    1.70
   5   0  12   59.09    4.80
  -5   0  12   65.89    8.00
  -6   0  12   -2.30    3.90
   6   0  12    2.50    3.00
   7   0  12   13.40    3.30
  -7   0  12   17.20    5.50
   8   0  12   10.80    4.00
  -8   0  12    9.60    6.30
   0  -1  12  307.57   13.80
   1  -1  12  125.09    6.60
  -1   1  12  120.99    7.60
   1   1  12  110.29    6.70
  -1  -1  12  111.79    7.40
  -2   1  12   14.40    3.70
   2  -1  12   11.10    2.10
   2   1  12    8.80    2.30
  -2  -1  12   12.20    3.40
   3  -1  12  147.09    6.60
  -3   1  12  136.39    9.30
  -3  -1  12  115.09    8.80
   3   1  12  110.79    6.80
  -4   1  12  108.49    9.20
   4  -1  12  110.99    5.90
   4   1  12  115.89    6.70
  -4  -1  12  114.69    9.20
   5  -1  12   52.79    4.40
  -5   1  12   58.79    8.50
  -5  -1  12   67.69    7.50
   5   1  12   77.79    6.30
   6  -1  12   28.80    3.70
  -6   1  12   30.40    6.30
  -6  -1  12   21.30    5.50
   6   1  12   23.60    3.80
   7  -1  12   53.39    5.00
  -7   1  12   53.19    8.10
   7   1  12   59.19    6.30
  -7  -1  12   43.30    7.60
  -8   1  12   33.50    8.20
   8   1  12   20.20    4.60
  -8  -1  12   34.00    7.30
   0  -2  12    4.70    2.00
   0   2  12    6.50    2.50
  -1   2  12   59.99    5.70
   1  -2  12   62.29    4.50
   1   2  12   58.99    5.00
  -2   2  12  283.97   14.40
   2  -2  12  290.77   12.30
  -2  -2  12  290.57   14.40
  -3   2  12   48.30    6.40
   3  -2  12   52.89    3.50
   3   2  12   68.99    5.20
  -3  -2  12   61.69    6.50
  -3   2 -12   58.19    3.50
  -4   2  12   27.50    5.50
   4  -2  12   26.10    2.40
   4  -2  12   35.10    2.70
  -4  -2  12   24.30    5.20
   4   2  12   21.80    3.30
   5  -2  12   44.40    3.00
   5  -2  12   41.70    3.10
  -5   2  12   43.30    9.30
  -5  -2  12   57.69    9.80
   6  -2  12  147.79    7.30
  -6   2  12  161.98   12.60
  -6  -2  12  178.78   13.00
   6   2  12  175.08    9.60
   7  -2  12    2.00    2.10
  -7   2  12    3.40    5.40
   7   2  12   -1.50    3.00
  -7  -2  12    4.70    4.80
  -8   2  12   -7.00    5.10
  -8  -2  12    2.50    5.50
   8   2  12   -2.50    3.50
   0  -3  12  346.77   15.10
   0   3  12  333.27   15.60
   1  -3  12   15.10    2.60
  -1   3  12   18.50    3.70
   1   3  12   18.80    3.20
  -2   3  12   57.69    6.20
   2  -3  12   67.09    4.00
  -2  -3  12   65.19    6.10
   2   3  12   57.99    5.00
  -3   3  12   50.29    6.70
  -3  -3  12   67.39    6.60
   3   3  12   67.79    5.40
  -4   3  12  205.78   13.60
   4   3  12  245.18   11.70
  -4  -3  12  248.98   13.90
  -5  -3  12   23.80    9.00
   5   3  12   19.10    3.60
  -6   3  12    4.60    4.50
   6   3  12   10.40    3.10
  -6  -3  12   13.20    5.00
  -7   3  12    5.60    5.50
  -7  -3  12   12.80    5.70
   7   3  12    2.80    3.30
   8   3 -12   40.30    9.20
  -8   3  12   50.79    9.40
  -8  -3  12   53.39    9.50
   8   3  12   58.59    9.80
   0  -4  12   41.00    4.20
   0   4  12   42.60    5.00
  -1   4  12    7.30    3.20
   1  -4  12   10.90    2.10
   1   4  12    9.20    2.90
  -1  -4  12    6.20    2.90
   2  -4  12  477.85   18.40
  -2   4  12  442.96   20.80
  -2  -4  12  449.66   20.60
   2   4  12  446.16   19.60
  -3   4  12   29.00    5.10
   3   4  12   34.20    4.60
  -3  -4  12   34.10    5.30
  -4   4  12   27.30    5.60
  -4  -4  12   31.80    5.60
   4   4  12   29.30    4.20
  -5   4  12   18.50    5.30
   5   4  12   18.70    3.60
  -5  -4  12   18.30    4.90
  -6   4  12  151.08   12.80
  -6  -4  12  161.68   12.70
   6   4  12  166.88   10.20
   7   4 -12   -5.80    4.80
  -7   4  12    0.20    5.10
   7   4  12    5.30    4.70
  -7  -4  12    7.20    5.60
   8   4 -12   -5.30   11.00
  -8   4  12   -1.60    6.10
   8   4  12    4.10    4.00
   0  -5  12 1005.00   39.10
   0   5  12  990.20   40.00
   1  -5  12   26.10    3.20
  -1   5  12   32.20    5.00
  -1   5 -12   22.30    2.90
  -1  -5  12   29.80    4.10
   1   5  12   32.80    4.50
  -2   5  12  173.08   11.00
   2   5  12  190.48   10.40
  -2  -5  12  200.28   11.20
  -3   5  12    7.40    3.70
  -3  -5  12    8.30    3.60
   3   5  12    6.60    2.60
  -4   5  12  564.94   26.10
  -4  -5  12  546.55   25.70
   4   5  12  550.04   23.70
  -5   5  12    7.60    4.20
   5   5 -12    2.80    4.50
  -5  -5  12    6.20    4.30
   5   5  12    5.30    3.20
   6   5 -12    2.60    5.10
  -6   5  12    1.00    4.50
  -6  -5  12    4.50    5.20
   6   5  12    7.70    3.70
  -7   5  12   -3.20    5.00
   7   5 -12   -2.10    6.40
  -7  -5  12    0.80    5.00
   7   5  12   -3.00    3.70
  -8   5  12   42.90    9.10
   8   5 -12   20.00   10.80
   8   5  12   33.20    6.00
  -8  -5  12   47.80   10.10
   0   6 -12  416.66   18.10
   0   6  12  405.86   19.00
   0  -6  12  413.76   17.80
  -1   6  12   24.30    4.60
   1   6 -12   18.60    4.00
  -1  -6  12   26.30    4.10
  -1   6 -12   21.90    3.00
   1   6  12   30.70    4.60
   2   6 -12  964.20   38.90
  -2   6  12  984.90   39.20
   2   6  12  913.41   37.80
  -2  -6  12  896.01   38.30
  -3   6  12   12.60    4.50
   3   6 -12   13.10    4.20
  -3  -6  12   13.10    4.10
   3   6  12   15.00    3.70
   4   6 -12    4.60    4.80
  -4   6  12    8.20    7.40
   4   6  12   10.90    3.60
  -4  -6  12   15.20    4.80
  -5   6  12    1.80    3.90
   5   6 -12    0.40    4.50
   5   6  12    8.40    3.70
  -5  -6  12    8.50    5.10
  -6   6  12  107.59   11.20
   6   6 -12  105.49   12.20
   6   6  12  100.39    9.00
  -6  -6  12  113.79   11.30
  -7   6  12   -5.90    5.60
   7   6 -12   -1.10    7.00
   7   6  12    0.70    3.80
  -7  -6  12   11.80    5.90
  -8   6  12   -0.10    6.60
   8   6 -12   -0.10    7.10
   8   6  12    2.40    4.70
  -8  -6  12    0.40    6.40
   0   7  12  365.26   17.60
   0   7 -12  366.86   16.40
  -1   7  12   53.99    6.50
   1   7 -12   61.89    6.10
  -1  -7  12   43.10    5.30
   1   7  12   48.20    5.90
  -1   7 -12   36.60    3.80
  -2   7  12   31.50    5.30
   2   7 -12   26.10    5.00
  -2  -7  12   49.10    5.80
   2   7  12   32.60    4.80
  -3   7  12  112.79   10.30
   3   7 -12  106.79    9.50
  -3  -7  12   95.49    8.30
   3   7  12   92.99    7.80
  -4   7  12  167.48   12.10
   4   7  12  173.68   11.90
  -5   7  12   15.60    5.50
   5   7 -12   20.10    5.90
  -5  -7  12   35.70    6.80
   5   7  12   29.00    5.10
  -6   7  12   -5.40    4.90
   6   7 -12    5.00    6.00
  -6  -7  12   -0.10    4.80
   6   7  12    3.50    4.10
  -7   7  12   10.90    6.20
   7   7 -12   18.10    7.70
  -7  -7  12   18.90    7.10
   7   7  12   21.10    5.60
   0   8  12   13.60    4.20
   0   8 -12   15.90    3.70
   1   8 -12   24.10    4.30
  -1   8  12   18.70    4.20
   1   8  12   17.50    4.20
  -1   8 -12   18.10    2.70
   2   8 -12   73.99    7.20
  -2   8  12   90.19   12.30
  -2  -8  12   84.29    7.50
   2   8  12   81.49    7.70
   3   8 -12   69.19    8.30
  -3   8  12   64.69    8.10
   3   8  12   75.79    9.60
  -3  -8  12   80.89    7.60
  -4   8  12   12.70    4.80
   4   8 -12   18.80    5.60
  -4  -8  12   18.80    4.80
   4   8  12   13.70    4.10
   5   8 -12   90.49   10.70
  -5   8  12   76.59    9.80
  -5  -8  12   94.69    9.80
   5   8  12   87.19    8.50
   6   8 -12   34.40    8.30
  -6   8  12   35.90    7.50
   6   8  12   27.20    5.80
  -6  -8  12   45.70    8.00
  -7   8  12   -1.10    6.20
   7   8  12    2.10    4.80
   0   9  12   17.00    4.20
   0   9 -12   23.50    3.60
  -1   9  12   57.09    6.70
   1   9 -12   50.89    6.10
  -1   9 -12   68.49    4.80
   1   9  12   79.09    7.60
   2   9 -12    0.40    3.30
  -2   9  12    1.90    3.60
   2   9  12   -0.40    3.60
  -3   9  12   29.10    5.60
   3   9 -12   37.40    6.50
   3   9  12   38.90    5.50
   4   9 -12    8.10    5.50
  -4   9  12    6.70    4.90
   4   9  12   12.40    4.70
  -5   9  12   30.20    7.00
   5   9 -12   44.80    8.10
   5   9  12   49.60    7.00
   6   9 -12    4.60    6.70
  -6   9  12   11.50    6.30
   6   9  12   12.50    5.10
   7   9 -12   28.10    9.10
  -7   9  12    6.10    6.30
   7   9  12   28.60    6.30
   0  10 -12    1.10    2.50
   0  10  12   -4.10    3.20
  -1  10  12   54.99    7.20
   1  10 -12   48.60    6.00
   1  10  12   65.89    7.50
  -1  10 -12   54.29    4.80
  -2  10  12    5.60    4.20
   2  10 -12    7.50    3.80
   2  10  12   13.00    4.80
  -3  10  12   50.59    7.40
   3  10 -12   54.39    7.70
   3  10  12   55.29    7.20
   4  10 -12    0.70    4.20
  -4  10  12    5.20    4.90
   4  10  12    2.40    3.90
   5  10 -12   18.40    7.00
  -5  10  12   18.80    6.50
   5  10  12   19.30    5.70
  -6  10  12   -5.80    5.40
   6  10 -12    2.10    6.60
   6  10  12   -2.30    4.60
   0  11  12   -2.70    3.60
   0  11 -12   -2.30    2.50
  -1  11  12   58.79    7.80
   1  11 -12   59.59    6.60
   1  11  12   47.10    6.90
  -1  11 -12   43.10    5.60
  -2  11  12    5.10    4.10
   2  11 -12    2.50    3.50
   2  11  12    2.40    4.00
   3  11 -12   27.40    5.90
  -3  11  12   24.60    5.90
   3  11  12   22.40    5.40
   4  11 -12    6.90    4.60
  -4  11  12   14.60    5.80
   4  11  12   11.60    5.10
  -5  11  12   17.70    6.50
   5  11 -12   17.50    7.40
   5  11  12    4.00    5.00
   6  11 -12    3.50    6.70
  -6  11  12    1.10    7.20
   6  11  12    4.90    6.10
   0  12  12    4.40    4.20
   0  12 -12   -0.70    2.90
   1  12 -12   39.00    5.40
  -1  12  12   31.90    6.10
   1  12  12   44.50    6.90
  -1  12 -12   30.30    4.20
  -2  12  12   35.40    7.00
   2  12 -12   31.80    5.80
   2  12  12   27.30    6.10
   3  12 -12   17.10    5.20
  -3  12  12   12.90    6.00
   3  12  12   16.40    5.50
   4  12 -12    0.10    5.20
  -4  12  12    2.00    5.20
   4  12  12    5.50    5.50
   5  12 -12    4.80    6.20
  -5  12  12   -2.80    5.70
   5  12  12    6.20    6.10
   0  13  12   68.99    9.10
   0  13 -12   61.39    6.60
  -1  13  12   10.20    5.30
   1  13 -12    8.80    4.10
   1  13  12   11.80    5.30
   2  13 -12   -2.40    3.20
  -2  13  12   -4.20    4.40
   2  13  12   -3.10    3.90
   3  13 -12   11.10    5.00
  -3  13  12    8.60    5.10
   3  13  12    1.60    5.90
  -4  13  12   33.40    8.10
   4  13 -12   30.20    6.90
   4  13  12   35.60    7.30
   0  14  12   -3.80    4.30
   0  14 -12   -6.80    3.20
  -1  14  12    4.80    4.80
   1  14 -12   -5.60    3.30
   1  14  12   -4.50    7.60
   2  14 -12   29.70    6.00
  -2  14  12   33.10    8.40
   2  14  12   37.00    8.20
  -3  14  12    5.90    9.70
   3  14 -12   -2.30    4.90
   3  14  12    5.20    5.90
   0  15  12   37.70    7.60
   0  15 -12   29.50    6.90
  -1  15  12    3.10    5.70
   1  15 -12    1.60    4.00
   1  15  12    6.30    5.80
   0   0  13   -2.80    1.90
  -1   0  13  215.98   11.20
   1   0  13  208.48   10.30
  -2   0  13    7.20    3.20
   2   0  13    9.20    2.30
  -3   0  13  174.48   11.10
   3   0  13  180.18    8.80
   4   0  13   49.80    4.40
  -4   0  13   60.39    7.40
   5   0  13   36.10    4.20
  -5   0  13   35.70    6.40
  -6   0  13    0.10    4.30
  -7   0  13   80.99   10.70
   7   0  13   74.09    6.20
   8   0  13    3.20    3.50
  -8   0  13    4.80    5.90
   0  -1  13    1.40    2.00
   0   1  13   -0.40    2.00
  -1   1  13  173.78    9.70
   1  -1  13  175.68    8.60
  -1  -1  13  147.69    9.20
   2  -1  13  109.79    6.10
  -2   1  13   94.59    7.50
   2   1  13  103.69    6.40
  -2  -1  13  106.49    7.80
   3  -1  13  151.78    7.50
  -3   1  13  138.39   10.00
  -3  -1  13  156.68   10.40
   3   1  13  153.48    8.10
  -4   1  13    1.80    3.60
   4  -1  13    3.30    1.80
  -4  -1  13    1.50    3.80
  -5   1  13  148.39   11.40
   5  -1  13  154.98    7.40
   5   1  13  148.69    8.40
  -5  -1  13  124.29   10.80
  -6   1  13   36.60    6.70
   6  -1  13   33.30    4.00
   6   1  13   44.70    5.30
  -6  -1  13   54.89    8.20
  -7   1  13   24.20    6.70
   7  -1  13    8.00    2.80
  -7  -1  13   24.30    7.30
   7   1  13   11.10    3.50
  -8   1  13    8.40    6.30
  -8  -1  13    3.00    6.00
   8   1  13   -3.20    3.40
   0  -2  13  159.98    8.70
   0   2  13  156.58    9.00
  -1   2  13  227.88   12.10
   1  -2  13  223.78   10.80
   1   2  13  233.58   11.40
  -1  -2  13  237.68   12.00
  -2   2  13   63.19    6.60
   2  -2  13   64.29    4.40
   2   2  13   65.59    5.30
  -2  -2  13   61.19    6.20
   3  -2  13  246.58   10.30
  -3   2  13  241.18   13.60
   3   2  13  230.38   11.40
  -3  -2  13  229.18   13.20
   4  -2  13  183.48    9.00
  -4   2  13  201.38   13.00
   4  -2  13  220.58    9.00
   4   2  13  223.78   10.70
  -4   2 -13  206.28    9.00
  -4  -2  13  218.18   13.10
   5  -2  13    3.40    1.50
  -5   2  13    9.00    5.00
   5  -2  13    8.70    1.60
   5   2  13    9.50    3.10
  -5  -2  13    9.10    4.70
  -6   2  13   26.50    6.10
  -6  -2  13   30.30    6.20
   6   2  13   36.70    4.70
  -7   2  13    9.70    5.50
   7   2  13   12.30    3.70
  -7  -2  13   24.30    6.80
  -8   2  13   17.00    7.20
  -8  -2  13   15.80    8.00
   8   2  13   10.00    4.30
   0   3  13   62.79    5.80
   0  -3  13   61.89    5.30
  -1   3  13  310.47   15.50
   1  -3  13  332.37   14.10
   1   3  13  304.97   14.70
  -1  -3  13  318.37   15.10
  -2   3  13  395.86   19.60
   2  -3  13  409.56   17.10
   2   3  13  434.66   18.50
  -2  -3  13  450.85   19.70
  -3   3  13   -0.40    2.80
  -3  -3  13    0.20    3.10
   3   3  13    2.40    2.50
  -4   3  13   40.40    6.30
   4   3  13   68.39    5.70
  -4  -3  13   57.59    7.40
  -5   3  13   19.40    5.70
   5   3  13   20.00    3.70
  -5  -3  13   27.40    6.30
  -6   3  13   55.09    8.50
  -6  -3  13   75.59    9.50
   6   3  13   76.09    6.70
  -7   3  13    0.60    5.10
  -7  -3  13    3.20    5.40
   7   3  13   -0.80    3.40
  -8   3  13    5.40    6.60
   8   3  13    2.60    4.70
   0  -4  13  533.55   22.30
   0   4  13  528.75   23.10
   1  -4  13    6.70    2.10
  -1   4  13    4.60    3.20
   1   4  13    6.40    3.00
  -1  -4  13   10.40    3.20
   2  -4  13   80.89    4.60
  -2   4  13   78.59    7.20
  -2  -4  13   87.89    7.10
   2   4  13   85.39    6.50
  -3   4  13   35.00    6.00
  -3  -4  13   20.90    4.50
   3   4  13   26.80    4.00
  -4   4  13  234.68   15.20
   4   4  13  249.68   12.60
  -4  -4  13  254.37   14.40
  -5   4  13    3.30    4.20
  -5  -4  13    8.00    4.40
   5   4  13   -2.10    2.70
  -6   4  13   32.40    7.20
   6   4  13   33.60    4.80
  -6  -4  13   35.20    7.00
  -7   4  13    6.90    5.80
   7   4 -13   -2.20    5.90
   7   4  13    4.50    6.00
  -7  -4  13    9.80    5.70
  -8   4  13   19.30    8.30
   8   4 -13   19.00    8.60
   8   4  13   27.40    5.60
  -8  -4  13   24.80    8.20
   0  -5  13  246.28   12.10
   0   5  13  255.87   13.20
   1  -5  13    3.60    2.00
  -1   5  13    4.90    3.30
  -1  -5  13    6.20    2.80
   1   5  13    1.90    2.60
  -2   5  13  437.86   20.70
   2   5  13  440.46   19.50
  -2  -5  13  430.56   20.30
  -3   5  13    7.80    4.00
   3   5  13    9.60    3.30
  -3  -5  13    9.20    3.70
  -4   5  13   73.79    9.20
  -4  -5  13   84.99    8.60
   4   5  13   80.99    7.10
   5   5 -13    4.00    4.40
  -5   5  13    8.90    4.70
  -5  -5  13    0.00    4.40
   5   5  13   10.60    3.70
  -6   5  13   90.79    9.90
   6   5  13   84.79   11.20
  -6  -5  13   82.59   10.40
   7   5 -13   -0.50    6.90
  -7   5  13   -2.90    5.60
  -7  -5  13    1.00    5.30
   7   5  13   -0.90    3.80
   8   5 -13    6.00    6.90
  -8  -5  13   14.30    7.20
   8   5  13   -1.10    4.40
   0   6  13  739.53   31.40
   0  -6  13  749.53   30.20
   0   6 -13  751.12   30.30
   1   6 -13   13.80    3.70
   1  -6  13   14.00    2.60
  -1   6  13   11.00    3.60
  -1  -6  13   19.40    3.70
   1   6  13   10.40    3.60
  -1   6 -13   16.10    2.60
   2   6 -13  111.59    8.90
  -2   6  13  123.79    9.50
  -2  -6  13  121.89    9.00
   2   6  13  121.69    8.40
   3   6 -13   24.50    5.20
  -3   6  13   36.80    6.90
   3   6  13   32.10    4.80
  -3  -6  13   32.50    5.30
  -4   6  13  107.99   10.00
   4   6  13  103.19    8.20
  -5   6  13    0.20    4.00
   5   6 -13   -6.50    4.30
  -5  -6  13   -5.80    4.00
  -6   6  13   -2.70    4.90
   6   6 -13    1.10    5.40
   6   6  13    4.90    3.60
  -6  -6  13   -0.60    5.00
  -7   6  13    6.60    6.40
   7   6 -13   10.20    7.20
   7   6  13   12.50    4.80
  -7  -6  13   16.00    6.70
   8   6 -13   17.90    8.60
  -8   6  13   27.80    8.70
   8   6  13   23.20    6.00
  -8  -6  13   18.30    7.80
   0   7 -13    2.90    2.60
   0  -7  13    5.10    2.50
   0   7  13    0.90    3.10
   1   7 -13  168.18   10.30
  -1   7  13  152.18   10.50
  -1  -7  13  164.98    9.80
   1   7  13  158.58   10.20
  -1   7 -13  166.08    8.10
   2   7 -13  144.29    9.50
  -2   7  13  144.19   10.70
   2   7  13  119.29    8.90
  -2  -7  13  115.49    8.80
   3   7 -13    2.20    3.90
  -3   7  13    0.30    3.50
  -3  -7  13    3.20    3.30
   3   7  13    3.00    3.30
   4   7 -13   10.30    4.90
  -4   7  13   12.80    4.90
   4   7  13   13.70    4.70
  -4  -7  13    9.80    4.50
   5   7 -13   34.70    7.30
  -5   7  13   36.50    7.40
  -5  -7  13   39.90    7.10
   5   7  13   46.20    6.10
  -6   7  13   23.90    7.10
   6   7 -13   23.80    8.10
   6   7  13   22.60    5.10
  -6  -7  13   25.70    6.80
  -7   7  13   -7.40    5.50
  -7  -7  13   -7.50    8.10
   7   7  13   -2.40    4.60
   0   8  13   13.70    6.10
   0   8 -13    9.00    4.60
   1   8 -13   99.59    8.10
  -1   8 -13  119.19    6.40
   1   8  13  118.29   12.10
   2   8 -13    2.30    3.40
  -2   8  13   -0.60    3.10
   2   8  13   -2.30    3.70
  -2  -8  13    0.20    2.60
  -3   8  13  126.59   10.70
   3   8 -13  132.09   10.90
   3   8  13  144.39   10.00
  -3  -8  13  147.89   10.50
  -4   8  13   29.60    6.30
   4   8 -13   26.70    6.30
  -4  -8  13   34.30    6.20
   4   8  13   33.50    5.50
  -5   8  13    1.90    4.90
   5   8 -13   11.40    5.70
   5   8  13   12.70    4.40
  -5  -8  13   18.50    5.40
  -6   8  13    0.90    5.50
   6   8 -13   10.20    7.00
  -6  -8  13   14.30    6.30
   6   8  13    8.70    4.80
   7   8 -13   28.50    9.20
  -7   8  13   17.40    8.60
  -7  -8  13   28.00    7.60
   7   8  13   23.20    6.10
   0   9  13   18.20    4.40
   0   9 -13   18.10    3.30
   1   9 -13  148.59    9.70
  -1   9  13  138.39   10.60
  -1   9 -13  158.38    8.00
   1   9  13  143.19   10.50
  -2   9  13   -1.60    3.30
   2   9 -13    0.50    3.30
   2   9  13   -1.90    3.10
  -3   9  13   35.50    6.30
   3   9  13   46.00    6.60
  -4   9  13    1.40    4.20
   4   9 -13    0.80    4.90
  -4  -9  13    1.70    3.80
   4   9  13    6.00    3.90
  -5   9  13   49.30    9.00
   5   9 -13   45.50    8.40
  -5  -9  13   64.49    9.20
   5   9  13   51.49    7.00
   6   9 -13   10.30    7.50
  -6   9  13    5.20    5.80
   6   9  13    8.10    4.90
   0  10 -13   13.90    3.40
   0  10  13   21.70    5.20
  -1  10  13   68.29    8.10
   1  10 -13   72.49    6.90
  -1  10 -13   58.29    5.00
   1  10  13   63.19    7.80
   2  10 -13    3.50    3.70
  -2  10  13    4.80    4.20
   2  10  13    1.40    4.00
  -3  10  13   65.99    8.60
   3  10 -13   62.29    8.10
   3  10  13   57.49    7.40
   4  10 -13    2.90    4.70
  -4  10  13    5.10    5.20
   4  10  13    0.50    4.40
  -5  10  13    5.20    5.40
   5  10 -13    4.60    5.80
   5  10  13   10.90    5.10
  -6  10  13   -3.80    6.40
   6  10  13   -4.40    4.60
   0  11  13    9.30    4.40
   0  11 -13    8.50    3.10
  -1  11  13   38.90    6.80
   1  11 -13   28.00    4.80
   1  11  13   33.50    6.20
  -1  11 -13   20.60    3.50
   2  11 -13   30.30    6.70
  -2  11  13   23.50    5.80
   2  11  13   22.30    5.20
  -3  11  13   23.00    6.10
   3  11 -13   22.20    5.90
   3  11  13   16.10    5.40
   4  11 -13    5.60    5.60
  -4  11  13   -1.70    4.80
   4  11  13    2.90    4.70
   5  11 -13   56.79    9.40
  -5  11  13   47.80    8.90
   5  11  13   42.40    7.40
   0  12 -13   98.19    7.80
   0  12  13   93.69   10.10
  -1  12  13   18.00    5.40
   1  12 -13   19.70    4.60
   1  12  13   24.80    6.20
   2  12 -13    4.40    4.20
  -2  12  13    0.10    4.80
   2  12  13   11.50    5.20
   3  12 -13   44.30    6.90
  -3  12  13   33.30    7.50
   3  12  13   28.90    6.50
  -4  12  13   35.40    7.80
   4  12 -13   25.30    6.70
   4  12  13   35.40    8.00
  -5  12  13    8.00   11.20
   5  12  13    7.10    6.00
   0  13 -13   -0.50    3.10
   0  13  13    0.20    4.60
  -1  13  13   11.20    4.90
   1  13 -13    1.20    4.20
   1  13  13    6.80    5.10
  -1  13 -13   -4.60    3.30
   2  13 -13   69.79    8.50
  -2  13  13   87.39   10.40
   2  13  13   76.69   10.10
   3  13 -13    3.60    4.90
  -3  13  13    4.40    5.20
   3  13  13   17.00    9.70
  -4  13  13    7.40    6.40
   4  13 -13   11.10    5.70
   4  13  13    1.60    6.10
   0  14 -13   13.80    4.40
   0  14  13   23.80    8.70
   1  14 -13   -8.40    3.60
  -1  14  13    9.70    9.50
   1  14  13    2.50    4.80
  -2  14  13    4.70    5.40
   2  14 -13   -7.20    3.70
   2  14  13    7.80    5.80
   0   0  14  107.09    7.10
  -1   0  14  160.38    9.50
  -2   0  14   -2.40    2.50
   2   0  14   -1.10    1.80
   3   0  14   66.49    4.90
  -3   0  14   60.69    7.20
  -4   0  14    9.30    4.40
   4   0  14    4.60    2.40
   5   0  14   60.79    5.00
  -5   0  14   58.19    8.20
  -6   0  14    4.50    4.40
   7   0  14   48.00    5.70
  -7   0  14   40.80    8.00
   0   1  14   41.00    5.00
   0  -1  14   35.60    4.50
   1  -1  14  117.49    7.10
  -1   1  14  113.19    8.00
  -1  -1  14  116.49    8.00
   1   1  14  113.69    7.30
   2  -1  14   27.90    3.40
  -2   1  14   32.90    5.20
   2   1  14   21.40    3.30
  -2  -1  14   25.00    4.70
   3  -1  14  106.29    5.90
  -3   1  14  111.49    8.80
   3   1  14   86.09    7.30
  -3  -1  14   91.49    8.20
  -4   1  14    1.60    3.80
   4  -1  14    2.50    1.90
   4   1  14    2.70    2.40
  -4  -1  14   -1.30    3.60
   5  -1  14  108.79    6.30
  -5   1  14  112.69   10.60
   5   1  14  131.49    7.70
  -5  -1  14  121.49   10.50
  -6   1  14   24.20    6.20
   6  -1  14   20.60    2.90
  -6  -1  14   11.60    5.60
   6   1  14   11.10    3.40
  -7   1  14   30.70    7.90
   7  -1  14   31.90    4.80
  -7  -1  14   37.40    7.80
   7   1  14   43.60    5.00
   8   1  14   -2.50    3.70
  -8  -1  14    2.50    7.30
   0   2  14   10.10    3.10
   1  -2  14  218.08   10.30
  -1   2  14  198.38   11.40
   1   2  14  185.98   10.60
  -1  -2  14  209.58   11.20
  -2   2  14   67.69    7.00
   2  -2  14   72.39    4.80
   2   2  14   59.09    5.60
  -2  -2  14   63.29    6.50
  -3   2  14  138.29   10.40
   3  -2  14  153.48    7.50
  -3  -2  14  159.98   10.60
   3   2  14  164.58    8.90
  -4   2  14   31.80    6.50
   4  -2  14   31.60    2.90
   4   2  14   24.10    3.80
  -4  -2  14   23.70    5.50
  -5   2  14   40.80    7.10
   5  -2  14   46.90    3.60
   5  -2  14   37.70    4.30
  -5  -2  14   65.99    7.70
   5   2  14   59.99    5.90
  -6   2  14    5.30    4.80
   6   2  14   12.50    3.70
  -6  -2  14    9.80    5.60
  -7   2  14   26.90    7.40
   7   2  14   21.20    4.10
  -7  -2  14   19.50    5.90
  -8   2  14    7.50   10.60
   8   2  14   -3.80    3.60
  -8  -2  14    1.70    6.80
   0   3  14  372.76   17.80
   0  -3  14  394.96   17.30
   1  -3  14  197.28   10.20
  -1   3  14  207.48   11.80
   1   3  14  209.98   11.20
  -1  -3  14  216.78   11.40
   2  -3  14   45.20    4.00
  -2   3  14   56.49    6.80
   2   3  14   44.70    5.10
  -2  -3  14   48.20    6.10
   3  -3  14   53.39    3.50
  -3   3  14   52.39    6.70
   3   3  14   47.60    5.40
  -3   3 -14   43.90    3.20
  -3  -3  14   44.30    6.00
  -4   3  14   33.70   10.40
   4   3  14   45.60    5.50
  -4  -3  14   44.50    6.50
  -5   3  14   26.40    6.10
  -5  -3  14   26.10    6.00
   5   3  14   26.30    4.00
  -6   3  14    1.60    4.10
   6   3  14   -0.10    2.90
  -6  -3  14   -0.10    4.20
  -7   3  14   23.20    6.80
   7   3  14   14.00    4.10
  -7  -3  14   16.20    6.60
  -8   3  14    6.30    7.90
   8   3 -14   15.40    8.40
  -8  -3  14   16.60    7.30
   8   3  14   10.40    4.50
   0   4  14   37.90    5.20
   0  -4  14   39.30    4.60
  -1   4  14   12.40    3.90
   1  -4  14   16.10    2.80
   1   4  14    5.80    3.00
  -1  -4  14   10.80    3.30
   2  -4  14   57.29    4.20
  -2   4  14   55.49    6.90
   2   4  14   74.99    6.20
  -2  -4  14   81.19    7.30
  -3   4  14   95.49    8.80
   3   4  14   94.89    7.20
  -3  -4  14   92.69    8.20
  -4   4  14   25.10    5.80
  -4  -4  14   34.30    6.60
   4   4  14   37.30    4.90
  -5   4  14   39.00    6.60
  -5  -4  14   48.10    7.10
   5   4  14   47.00    5.90
  -6   4  14   66.59    9.70
   6   4  14   69.49    6.80
  -6  -4  14   67.29    9.80
   7   4 -14   -7.40    6.10
  -7   4  14   -7.20    5.30
   7   4  14   -1.40    3.70
  -7  -4  14    4.20    5.80
   8   4 -14   18.10    8.60
  -8   4  14    5.10    6.50
  -8  -4  14    7.90    6.50
   8   4  14   -0.70    4.10
   0   5  14   62.79    6.60
   0  -5  14   72.09    5.90
   1  -5  14   16.20    2.90
  -1   5  14   13.40    3.80
   1   5  14   16.00    4.00
  -1  -5  14   12.60    3.50
   2  -5  14  147.59    7.00
  -2   5  14  170.18   10.80
  -2   5 -14  152.38    7.10
   2   5  14  149.69    9.40
  -2  -5  14  164.58   10.30
  -3   5  14   19.80    7.90
   3   5  14   27.90    4.70
  -3  -5  14   26.00    5.00
  -4   5  14  113.09   10.20
   4   5  14  108.09    8.20
  -5   5  14    8.60    5.50
   5   5  14   13.00    3.70
  -5  -5  14   11.20    5.00
   6   5 -14   16.40    6.80
  -6   5  14    5.10    6.30
   6   5  14   14.30    4.30
  -6  -5  14    9.60    5.20
  -7   5  14   -4.30    5.60
   7   5 -14    2.40    6.80
   7   5  14   -4.60    3.60
  -7  -5  14   -4.50    5.50
   0  -6  14   69.49    6.30
   0   6 -14   71.09    7.10
   0   6  14   72.89    7.20
   1  -6  14    2.90    2.10
  -1   6  14    5.30    3.50
   1   6 -14    3.40    3.20
  -1  -6  14    3.70    2.90
  -1   6 -14    4.20    2.20
   1   6  14    4.60    3.30
  -2   6  14   34.00    5.30
  -2  -6  14   16.80    4.10
   2   6  14   16.90    4.10
  -3   6  14   15.30    5.00
   3   6 -14   12.30    4.80
  -3  -6  14   23.40    4.90
   3   6  14   20.00    4.20
  -4   6  14    0.40    3.90
   4   6 -14   -2.90    4.00
  -4  -6  14    7.10    4.50
   4   6  14    7.30    3.50
  -5   6  14    3.60    4.80
   5   6 -14   11.20    5.80
   5   6  14    8.80    3.60
  -5  -6  14    1.40    4.50
  -6   6  14   20.20    6.70
   6   6 -14   22.80    7.60
  -6  -6  14   30.70    7.60
   6   6  14   26.60    5.10
   7   6 -14   -4.80    7.90
  -7   6  14   -0.40    6.70
   7   6  14    1.90    4.00
  -7  -6  14    1.50    9.00
   0   7  14    7.60    3.60
  -1   7  14   55.69    9.40
   1   7 -14   55.49    6.20
   1   7  14   33.30    5.30
  -1  -7  14   39.20    5.20
  -1   7 -14   32.40    3.90
   2   7 -14    8.80    3.70
  -2   7  14    7.60    3.80
   2   7  14   10.00    3.80
  -2  -7  14    5.40    3.10
  -3   7  14   29.50    5.90
   3   7 -14   30.00    6.10
  -3  -7  14   34.50    5.70
   4   7 -14   20.70    5.90
  -4   7  14   24.00    6.00
   4   7  14   18.50    4.50
  -4  -7  14   16.30    4.80
   5   7 -14    6.10    5.30
  -5   7  14   -5.10    4.60
   5   7  14    6.70    3.80
  -5  -7  14    0.30    4.30
  -6   7  14    3.60    5.70
   6   7 -14    9.60    6.90
  -6  -7  14   10.40    6.00
   6   7  14    7.10    4.10
   7   7 -14   11.60    8.50
  -7   7  14   18.20   10.90
   7   7  14   10.80    5.10
  -7  -7  14   15.20    7.50
   0   8  14   27.50    5.50
   1   8 -14   50.39    6.40
  -1   8  14   57.39    7.20
  -1  -8  14   56.29    6.30
  -1   8 -14   50.09    4.40
   1   8  14   53.39    6.70
  -2   8  14   18.70    5.20
   2   8 -14   26.30    5.10
  -2  -8  14   32.30    5.10
   2   8  14   29.20    5.30
   3   8 -14   53.89    8.60
  -3   8  14   70.79    8.50
   3   8  14   69.09    7.80
  -3  -8  14   71.89    8.70
  -4   8  14   11.10    5.20
   4   8 -14   12.70    5.30
   4   8  14    8.40    4.20
  -4  -8  14   13.70    4.70
  -5   8  14   44.20    8.50
   5   8 -14   46.10    8.40
  -5  -8  14   47.10    7.90
   5   8  14   51.99    6.80
   6   8 -14   -0.60    6.90
  -6   8  14   -7.60    5.80
   6   8  14    4.50    4.40
  -6  -8  14   -0.60    5.00
  -7   8  14   -2.20    6.50
   7   8 -14    0.90    8.10
  -7  -8  14    1.80    6.00
   7   8  14    1.40    5.10
   0   9 -14   -2.40    2.70
   0   9  14    4.20    3.70
   1   9 -14   83.49    7.70
  -1   9  14   79.99    8.50
  -1   9 -14   89.59    5.90
   1   9  14   91.79    8.70
  -2   9  14    5.40    4.40
   2   9 -14    4.90    3.70
   2   9  14    1.90    3.40
   3   9 -14   53.49    7.80
  -3   9  14   47.90    7.20
  -3  -9  14   64.39    7.60
   3   9  14   58.29    7.80
   4   9 -14    4.90    5.40
  -4   9  14    2.90    5.10
   4   9  14    8.50    4.60
  -4  -9  14   15.50    5.50
   5   9 -14   19.00    7.10
  -5   9  14   16.40    6.50
   5   9  14   18.00    5.20
  -5  -9  14   28.40    6.90
  -6   9  14    3.80    6.30
   6   9 -14    1.70    6.60
  -6  -9  14    6.00    6.00
   6   9  14    5.80    5.10
   0  10 -14   -0.60    2.70
   0  10  14    0.00    3.80
   1  10 -14   26.60    4.80
  -1  10  14   43.30    7.00
  -1  10 -14   28.20    3.60
   1  10  14   36.60    6.50
   2  10 -14   23.00    5.30
  -2  10  14   16.60    5.10
   2  10  14   14.40    4.90
   3  10 -14   34.90    6.60
  -3  10  14   31.60    6.20
   3  10  14   31.90    6.00
   4  10 -14   -0.30    4.90
  -4  10  14   -2.70    4.90
   4  10  14   -0.10    4.70
   5  10 -14   43.80    8.50
  -5  10  14   39.30    8.30
   5  10  14   38.50    6.80
  -6  10  14    4.20    6.70
   6  10 -14    2.10    6.80
   0  11 -14   13.90    3.80
   0  11  14   11.00    4.90
   1  11 -14   29.00    5.20
  -1  11  14   25.20    5.60
   1  11  14   15.40    5.20
  -1  11 -14   12.70    3.10
  -2  11  14    9.80    4.90
   2  11  14   11.70    4.70
  -3  11  14   29.30    6.70
   3  11 -14   30.90    6.60
   3  11  14   41.10    7.20
  -4  11  14   21.70    7.00
   4  11 -14   20.00    6.50
   4  11  14   20.20    6.20
   5  11 -14    9.90    6.70
   0  12  14    2.70    4.60
   0  12 -14    0.90    3.40
   1  12 -14   43.20    6.30
  -1  12  14   74.09    9.30
   1  12  14   41.60    7.50
   2  12 -14   30.60    5.90
  -2  12  14   30.70    6.30
   2  12  14   35.20    7.00
  -3  12  14    0.60    5.50
   3  12 -14    2.30    4.40
   3  12  14    6.50    5.40
   4  12 -14   -8.20    4.60
   4  12  14    1.80    6.30
   0  13 -14   38.50    5.20
   0  13  14   40.70    7.30
  -1  13  14   16.60    6.00
   1  13  14   10.10    5.80
   2  13 -14    3.30    4.60
   3  13 -14    7.60    5.20
  -3  13  14   10.00    6.40
   3  13  14    6.80    5.70
   0  14  14    4.00    5.50
   0  14 -14   -6.50    3.90
   1  14 -14   -7.90    3.60
   1  14  14    3.40    5.30
   2  14 -14   25.60    6.00
  -2  14  14   11.00    5.90
   2  14  14   32.20    7.40
   0   0  15   -1.10    2.30
   1   0  15   88.99    6.40
  -1   0  15   84.49    7.20
  -2   0  15   -3.20    2.70
  -3   0  15  102.09    9.00
   3   0  15  110.89    6.80
   4   0  15    0.70    2.20
  -4   0  15    2.90    6.90
   5   0  15   64.49    5.70
  -5   0  15   80.89    9.70
  -6   0  15   -6.10    4.40
  -7   0  15   33.60    7.90
   7   0  15   32.90    4.80
  -8   0  15   -7.10    5.70
   0   1  15   -2.00    2.30
   0  -1  15   -0.50    2.40
  -1   1  15   79.89    7.00
  -1  -1  15   86.19    7.00
   1   1  15   91.39    6.70
   2  -1  15   12.50    2.70
  -2   1  15    9.10    3.60
  -2  -1  15   11.90    3.80
   2   1  15   13.10    3.00
   3  -1  15  121.19    7.20
  -3   1  15  123.69    9.80
  -3  -1  15  142.99   10.00
   3   1  15  130.59    7.80
   4  -1  15   18.80    2.80
  -4   1  15   30.40    7.00
   4   1  15   15.50    3.30
   5  -1  15   94.69    5.80
  -5   1  15   80.49    9.60
  -5  -1  15   98.09    9.60
   5   1  15  101.89    7.00
   6  -1  15   -0.60    2.00
  -6   1  15   -5.10    4.40
   6   1  15    1.10    3.00
  -6  -1  15   -0.90    4.70
  -7   1  15   18.60    6.60
  -7  -1  15   17.80    6.80
   7   1  15   15.20    3.80
  -8   1  15    7.10    6.50
  -8  -1  15    5.30    6.90
   0   2  15   54.69    5.80
   0  -2  15   51.59    5.50
  -1   2  15  152.68    9.90
   1  -2  15  154.28    8.50
   1   2  15  148.39    9.00
  -1  -2  15  148.59    9.40
  -2   2  15   -1.90    3.00
   2  -2  15    0.00    1.90
  -2  -2  15    1.60    2.80
   2   2  15    0.00    2.50
   3  -2  15  183.78    8.90
  -3   2  15  165.58   11.80
   3   2  15  198.38   10.30
  -3  -2  15  187.08   11.90
  -4   2  15   41.20    6.40
   4  -2  15   46.00    3.60
   4   2  15   51.89    5.30
  -5   2  15   16.20    5.50
   5   2  15   26.70    4.20
  -5  -2  15   18.00    5.80
  -6   2  15   30.00    7.40
  -6  -2  15   32.30    7.50
   6   2  15   21.60    4.30
  -7   2  15   12.20    6.60
  -7  -2  15   18.40    6.90
   7   2  15    8.40    3.60
  -8   2  15   -0.50    6.50
  -8  -2  15    0.90    6.10
   8   2  15   -8.60    3.90
   0  -3  15    4.20    2.60
   0   3  15    5.70    3.10
   1  -3  15  284.27   12.80
  -1   3  15  273.37   14.20
  -1  -3  15  260.57   13.80
   1   3  15  256.67   13.50
  -2   3  15  226.88   13.10
   2  -3  15  225.48   10.70
  -2  -3  15  232.28   12.90
   2   3  15  224.88   11.90
   3  -3  15   16.20    2.30
  -3   3  15   22.30    4.90
   3   3  15   17.50    3.60
  -3  -3  15   19.70    4.70
  -3   3 -15   11.90    3.10
  -4   3  15   27.50    5.90
   4   3  15   29.30    4.30
  -4  -3  15   22.30    6.60
  -5   3  15   18.30    5.70
   5   3  15   29.20    4.30
  -5  -3  15   32.20    6.90
  -6   3  15   -5.50    4.80
  -6  -3  15    5.80    5.50
   6   3  15    9.30    3.70
  -7   3  15    0.10    4.90
   7   3  15   -1.90    3.40
  -7  -3  15   -3.10    5.60
   8   3 -15   -8.60    7.20
  -8   3  15    7.50    7.20
  -8  -3  15   17.20    7.20
   0  -4  15  152.68    9.00
   0   4  15  142.79    9.60
   1  -4  15   52.89    4.80
  -1   4  15   49.50    6.30
   1   4  15   42.90    5.40
  -1  -4  15   37.20    5.20
   2  -4  15    6.80    2.00
  -2   4  15    0.70    3.50
   2   4  15    4.20    2.70
  -2  -4  15    2.20    2.80
   3   4  15   32.90    4.70
  -3  -4  15   29.90    5.20
  -4   4  15   76.69    8.90
  -4  -4  15   74.39    8.50
   4   4  15   69.49    6.60
  -5   4  15    1.50    4.80
  -5  -4  15    6.00    4.70
   5   4  15    3.70    3.40
  -6   4  15   20.40    6.90
  -6  -4  15   12.90    5.70
   6   4  15   18.70    4.40
  -7   4  15   13.00    6.80
   7   4 -15   -5.60    6.40
   7   4  15    6.50    4.10
  -7  -4  15    9.00    6.30
   0  -5  15   58.69    6.10
   0   5  15   54.49    6.40
   1  -5  15   17.90    3.20
  -1   5  15   20.50    4.80
  -1  -5  15   17.70    4.00
   1   5  15   21.10    4.20
  -2  -5  15   31.10    5.10
   2   5  15   23.00    4.40
  -2   5 -15   22.90    2.60
  -3   5  15    1.30    4.00
   3   5  15    5.50    3.20
  -3  -5  15    1.60    3.30
  -4   5  15   12.30    5.30
  -4  -5  15   13.60    4.80
   4   5  15    8.10    3.40
  -5   5  15    0.10    4.50
   5   5  15    7.20    3.70
  -5  -5  15    4.90    4.70
  -6   5  15   36.30    8.00
   6   5 -15   42.40    8.90
   6   5  15   32.70    5.20
  -6  -5  15   58.99    9.40
  -7   5  15    3.00    6.30
  -7  -5  15   -4.90   10.90
   7   5  15   -0.60    4.10
   0   6 -15   29.30    4.30
   0  -6  15   35.60    4.60
   0   6  15   37.10    5.80
  -1   6  15   25.00    5.30
   1  -6  15   27.50    3.50
   1   6  15   14.20    4.00
  -1  -6  15   16.80    4.10
  -1   6 -15   22.30    3.30
  -2   6  15   74.89    8.00
  -2  -6  15   82.59    7.40
   2   6  15   81.49    7.30
  -3   6  15   18.10    5.20
   3   6 -15   21.10    5.30
  -3  -6  15   16.80    4.60
   3   6  15   11.50    3.70
  -4   6  15   23.40    5.80
   4   6 -15   21.60    6.00
  -4  -6  15    8.90    4.40
   4   6  15   12.10    5.80
  -5   6  15    1.80    5.00
   5   6 -15    2.90    5.20
   5   6  15    4.10    3.70
  -5  -6  15    0.90    4.40
   6   6 -15    9.40    7.20
  -6   6  15   -1.70    5.50
  -6  -6  15    4.40    5.60
   6   6  15    6.10    3.80
   7   6 -15    0.20    7.70
  -7  -6  15   12.00    7.50
   7   6  15    6.70    4.40
   0   7  15    2.80    3.40
   0   7 -15    1.40    2.80
   0  -7  15    1.20    2.70
  -1   7  15  127.19   10.20
   1   7 -15  149.29    9.80
  -1  -7  15  136.49    9.40
  -1   7 -15  138.99    7.60
   1   7  15  133.29   14.00
   2   7 -15   28.40    5.10
  -2   7  15   35.00    6.20
   2   7  15   23.50    5.20
  -2  -7  15   26.90    5.00
   3   7 -15    7.30    4.90
  -3   7  15    9.70    4.90
   3   7  15    8.40    3.90
  -3  -7  15   11.70    4.40
   4   7 -15   19.10    6.10
  -4   7  15   12.20    4.80
   4   7  15   13.50    4.40
  -4  -7  15   17.80    4.90
  -5   7  15    1.40    5.20
   5   7 -15   18.80    6.60
  -5  -7  15   10.50    5.70
   5   7  15   22.00    5.00
   6   7 -15   -9.40    6.30
  -6   7  15    5.50    6.00
   6   7  15    0.80    4.00
  -6  -7  15   -2.30    4.80
   7   7 -15   -3.60    7.50
  -7   7  15   -7.40    5.80
   7   7  15   -3.90    4.20
  -7  -7  15   -2.00    6.40
   0   8 -15   40.60    5.30
   0   8  15   48.50    6.70
   1   8 -15   85.29    8.00
  -1   8  15   65.69    7.50
  -1  -8  15   87.69    7.40
   1   8  15   73.99    8.30
  -1   8 -15   81.09    5.60
   2   8 -15   22.90    5.20
  -2   8  15   23.90    5.60
   2   8  15   22.60    4.90
  -2  -8  15   13.50    4.20
  -3   8  15   76.39    9.20
   3   8 -15   82.59   10.00
   3   8  15   69.69    8.00
  -3  -8  15   82.69    8.80
   4   8 -15    5.70    5.50
  -4   8  15   14.10    5.70
  -4  -8  15   18.10    5.50
   4   8  15   17.40    4.70
   5   8 -15    8.30    6.60
  -5   8  15    8.50    5.80
  -5  -8  15    6.20    5.30
   5   8  15    7.40    4.50
  -6   8  15    6.60    7.00
   6   8 -15    5.00    6.80
  -6  -8  15   15.30    6.50
   6   8  15    4.10    4.80
   0   9 -15   17.30    3.90
   0   9  15   18.30    5.30
   1   9 -15  112.89    8.70
  -1   9  15  116.99    9.70
  -1   9 -15  107.99    6.70
   1   9  15  100.09    9.50
   2   9 -15   -1.50    4.00
  -2   9  15    7.90    4.90
   2   9  15    5.10    4.10
   3   9 -15   11.90    5.30
  -3   9  15   15.10    5.30
   3   9  15   19.10    5.30
  -3  -9  15   16.40    5.10
   4   9 -15    6.80    5.50
  -4   9  15   14.40    5.60
   4   9  15   10.30    4.90
  -4  -9  15    8.90    5.40
   5   9 -15   49.50    9.60
  -5   9  15   35.60    7.90
  -5  -9  15   42.40    7.60
   5   9  15   57.99    7.90
  -6   9  15   -1.10    6.10
   6   9 -15   -1.50    9.80
   6   9  15   -7.70    4.20
  -6  -9  15   -2.10    6.90
   0  10  15   10.30    4.50
   0  10 -15   13.50    3.80
  -1  10  15   37.30    6.10
   1  10 -15   40.70    5.60
   1  10  15   42.10    6.80
  -1  10 -15   30.60    3.90
   2  10 -15    2.50    4.10
  -2  10  15    9.30    5.50
   2  10  15    3.70    4.60
  -3  10  15   92.19   10.10
   3  10 -15   75.99    9.80
   3  10  15   85.59    9.80
   4  10 -15    7.40    5.60
  -4  10  15   -0.10    5.20
   4  10  15    3.10    4.70
   5  10 -15    7.90    6.40
  -5  10  15   16.40   10.20
   5  10  15   10.40    5.50
   0  11  15    1.50    4.60
   0  11 -15    0.60    3.10
   1  11 -15   52.19    6.70
  -1  11  15   56.99    8.30
   1  11  15   43.90    7.00
  -1  11 -15   36.10    4.40
   2  11 -15   21.80    5.30
  -2  11  15   13.30    5.60
   2  11  15   24.10    6.00
   3  11 -15   25.10    6.40
  -3  11  15   29.50    6.60
   3  11  15   24.40    6.60
   4  11 -15    0.70    5.30
  -4  11  15    1.70    5.70
   4  11  15    3.70    5.50
  -5  11  15   40.50    8.20
   5  11  15   39.10    7.40
   0  12  15   59.79    8.50
   0  12 -15   48.70    5.90
  -1  12  15   29.40    6.60
   1  12 -15   26.30    5.40
   1  12  15    8.90    5.40
   2  12 -15    4.90    4.30
  -2  12  15    9.60    5.50
   2  12  15   14.90    6.00
   3  12 -15   37.00    7.10
   4  12 -15    0.80    5.80
  -4  12  15   11.50    6.60
   4  12  15   14.50    6.20
   0  13  15    1.10    6.70
   0  13 -15   -5.40    3.50
   1  13 -15   -3.20    4.50
  -1  13  15    5.70    5.70
   1  13  15    4.00    6.00
   2  13 -15   44.30    6.80
  -2  13  15   24.80    6.70
   2  13  15   33.50    7.30
   0   0  16   21.00    4.00
  -1   0  16   40.40    5.40
   1   0  16   46.40    5.20
   2   0  16    6.40    2.80
  -2   0  16    2.70    3.30
   3   0  16   61.19    6.20
  -3   0  16   66.99    7.10
  -4   0  16    1.50    3.90
  -5   0  16   19.70    6.30
  -6   0  16   -0.60    5.00
  -7   0  16    8.20    6.30
   0  -1  16   36.80    4.90
   0   1  16   36.10    4.90
  -1   1  16   45.40    5.60
   1  -1  16   47.40    5.10
   1   1  16   45.10    5.40
  -1  -1  16   44.80    5.80
   2  -1  16   19.20    3.60
  -2   1  16   14.90    4.00
  -2  -1  16    8.90    4.00
   2   1  16    5.80    2.80
   3  -1  16   30.40    3.70
  -3   1  16   31.80    5.60
  -3  -1  16   28.80    5.60
   3   1  16   25.80    4.00
   4  -1  16   14.30    2.70
  -4   1  16    5.70    4.80
  -4  -1  16   12.40    5.00
   4   1  16   13.90    3.30
  -5   1  16   35.40    7.20
   5  -1  16   33.60    3.80
  -5  -1  16   33.10    6.60
   5   1  16   34.80    4.60
  -6   1  16   21.20    6.80
   6  -1  16   11.90    2.60
   6   1  16   12.70    3.50
  -6  -1  16   13.20    6.10
  -7   1  16    5.10    5.50
  -7  -1  16   19.80    7.50
   7   1  16   11.10    3.80
   0  -2  16   12.90    3.50
   0   2  16   18.40    3.80
   1  -2  16   57.09    7.30
  -1   2  16   54.89    6.50
  -1  -2  16   75.69    7.00
   1   2  16   70.39    6.30
   2  -2  16   92.69    6.30
  -2   2  16   89.79    8.00
  -2  -2  16   78.19    7.60
   2   2  16   90.29    7.00
   3  -2  16   27.90    3.40
   3   2  16   37.50    4.70
  -3  -2  16   47.10    6.40
  -4   2  16   46.50    7.50
   4  -2  16   40.20    3.60
  -4  -2  16   24.00    5.70
   4   2  16   35.50    4.70
  -5   2  16   17.10    5.90
   5   2  16   29.80    4.60
  -5  -2  16   26.00    6.70
  -6   2  16    8.10    5.50
   6   2  16    4.40    3.30
  -6  -2  16    8.70    5.20
  -7   2  16    7.70    7.00
   7   2  16    7.70    4.10
  -7  -2  16   17.70    7.70
   0  -3  16  304.97   15.00
   0   3  16  307.37   15.50
   1  -3  16   89.19    6.50
  -1   3  16   84.69    7.70
   1   3  16   94.19    7.20
  -1  -3  16   94.29    7.70
  -2   3  16   69.39    7.50
   2  -3  16   56.19    5.10
   2   3  16   55.29    6.00
  -2  -3  16   60.09    6.50
   3  -3  16   30.50    3.40
  -3   3  16   33.00    5.60
  -3  -3  16   37.40    6.10
   3   3  16   39.40    5.10
  -4   3  16   33.60    6.40
   4   3  16   28.10    4.30
  -4  -3  16   23.00    5.60
  -5   3  16    9.40    5.40
  -5  -3  16   13.20    5.40
   5   3  16   13.30    3.70
  -6   3  16   -0.50    5.30
  -6  -3  16    1.10    4.90
   6   3  16   -4.00    3.10
  -7   3  16    5.30    8.70
   7   3  16    7.90    4.20
   0  -4  16   14.30    3.60
   0   4  16   14.20    4.00
   1  -4  16   15.20    3.30
  -1   4  16   21.70    4.50
   1   4  16   11.40    3.60
  -1  -4  16   11.30    3.70
  -2   4  16  103.19    9.90
   2  -4  16   86.89    5.70
  -2  -4  16   91.69    7.90
   2   4  16   87.79    7.30
  -3   4  16   57.09    7.50
   3   4  16   52.29    5.90
  -3  -4  16   45.80    7.00
  -4   4  16   -2.80    3.80
   4   4  16    3.60    3.10
  -4  -4  16    0.20    4.10
  -5   4  16   22.50    6.60
   5   4  16   28.50    4.80
  -5  -4  16   28.10    6.40
  -6   4  16   70.89   10.00
  -6  -4  16   52.39    9.10
   6   4  16   65.89   11.10
   7   4  16   -1.70    3.80
  -7  -4  16   13.00   10.50
   0  -5  16    1.40    2.40
   0   5  16   -1.20    3.20
  -1   5  16    0.30    3.50
   1  -5  16    2.10    2.40
  -1  -5  16    3.70    3.00
   1   5  16   -3.20    2.60
   2  -5  16   33.40    3.40
  -2   5  16   40.80    6.00
  -2  -5  16   38.60    5.70
   2   5  16   32.10    4.90
  -3   5  16    6.10    4.60
   3   5  16    7.20    3.30
  -3  -5  16    2.10    3.40
  -4   5  16  154.38   11.80
  -4  -5  16  125.19   10.70
   4   5  16  143.49    9.50
  -5   5  16   10.00    6.00
  -5  -5  16    6.30    4.80
   5   5  16    9.00    4.50
   6   5 -16    0.70    6.90
  -6   5  16    1.80    5.80
  -6  -5  16    9.40    5.80
   6   5  16    5.80    4.10
  -7   5  16   -6.00    6.10
   7   5 -16   -2.80    6.70
  -7  -5  16   -2.40    6.00
   7   5  16  -10.10    3.60
   0   6 -16   22.00    4.10
   0  -6  16   22.70    4.20
   1  -6  16    9.70    2.80
  -1   6  16   10.10    3.80
   1   6  16   11.90    5.30
  -1  -6  16   12.30    4.00
  -1   6 -16   11.00    3.00
  -2   6  16   48.40    7.30
  -2  -6  16   50.09    6.50
  -2   6 -16   43.70    3.50
   2   6  16   42.60    7.60
  -3   6  16   31.10    6.10
   3   6  16   29.10    6.50
  -4   6  16   -3.90    4.10
   4   6 -16   -2.30    4.60
  -4  -6  16   -1.30    4.00
   4   6  16    3.20    3.50
  -5   6  16   11.90    5.70
   5   6 -16    8.70    6.10
   5   6  16    8.40    4.20
  -5  -6  16   12.30    5.80
   6   6 -16   11.50    7.40
  -6   6  16   36.40    8.50
  -6  -6  16   38.70    8.30
   6   6  16   28.70    5.50
  -7   6  16   -5.30    5.70
   7   6 -16   -2.20    7.40
  -7  -6  16  -10.40    5.40
   7   6  16    6.40    4.90
   0  -7  16   60.79    6.40
   0   7  16   57.49    7.60
   0   7 -16   61.49    6.30
   1   7 -16   25.20    5.00
  -1   7  16   29.00    5.60
   1   7  16   30.60    5.60
  -1   7 -16   38.40    4.50
  -1  -7  16   34.00    4.90
  -2   7  16   52.69    7.40
   2   7 -16   59.19    7.70
  -2  -7  16   53.89    7.00
   2   7  16   41.00    5.90
  -3   7  16   41.20    7.10
   3   7 -16   33.30    6.70
   3   7  16   28.40    5.20
  -3  -7  16   27.90    6.00
  -4   7  16   33.30    7.20
   4   7 -16   23.30    6.80
   4   7  16   52.99    7.00
  -4  -7  16   47.30    7.30
   5   7 -16    6.00    6.50
  -5   7  16    5.70    5.90
  -5  -7  16    5.30    5.20
   5   7  16    6.40    4.30
   6   7 -16    2.30    7.10
  -6   7  16    4.00    8.10
  -6  -7  16   -1.40    5.70
   6   7  16   -0.50    4.50
   0   8 -16   45.50    5.50
   0   8  16   49.20    7.20
   1   8 -16   34.00    5.40
  -1   8  16   33.70    6.30
   1   8  16   34.10    6.10
  -1  -8  16   28.90    4.90
  -1   8 -16   27.10    3.80
  -2   8  16   30.90    6.10
   2   8 -16   34.10    6.10
  -2  -8  16   34.30    5.50
   2   8  16   28.00    5.70
   3   8 -16   13.10    5.10
  -3   8  16   19.50    5.90
  -3  -8  16   27.80    5.90
   3   8  16   25.50    5.30
  -4   8  16   45.80    7.70
   4   8 -16   49.60    8.10
   4   8  16   43.60    6.50
  -4  -8  16   50.59    7.90
  -5   8  16   24.20    7.00
   5   8 -16   10.80    7.30
  -5  -8  16   25.20    6.90
   5   8  16   20.00    5.60
  -6   8  16    1.30    6.30
   6   8  16    9.80    5.10
   0   9 -16    7.20    3.50
   0   9  16   15.20    5.10
   1   9 -16   21.90    4.80
  -1   9  16   27.20    6.20
  -1   9 -16   21.40    3.30
   1   9  16   30.60    6.00
  -2   9  16   34.20    6.60
   2   9 -16   27.60    6.10
   2   9  16   29.90    6.20
  -2  -9  16   35.20    5.80
   3   9 -16   38.70    7.30
  -3   9  16   37.60    7.20
  -3  -9  16   34.20    6.50
   3   9  16   39.40    6.50
  -4   9  16    0.80    4.90
   4   9 -16   -2.90    5.10
  -4  -9  16    1.30    4.40
   4   9  16    5.20    4.60
  -5   9  16   13.00    7.90
   5   9 -16   15.90    7.00
  -5  -9  16    8.70    5.60
   5   9  16    8.30    5.10
   0  10 -16    0.50    3.20
   0  10  16   13.10    5.10
   1  10 -16   27.20    5.30
  -1  10  16   49.00    7.60
   1  10  16   17.70    5.80
  -1  10 -16   21.60    3.50
  -2  10  16   -1.40    4.40
   2  10 -16    3.40    5.40
   2  10  16   -0.10    4.40
  -3  10  16   26.40    6.70
   3  10 -16   16.20    6.00
   3  10  16   20.10    6.00
   4  10 -16    4.50    5.70
  -4  10  16   12.60    6.00
   4  10  16    7.50    5.40
  -5  10  16   38.20    8.40
   5  10 -16   29.10    8.40
   5  10  16   36.30    9.40
   0  11  16   14.20    5.80
   0  11 -16    9.40    3.80
  -1  11  16   23.20    6.00
   1  11 -16   27.80    5.10
   1  11  16   15.70    5.50
  -2  11  16    0.30    4.90
   2  11 -16    7.50    4.70
   2  11  16    4.50    4.90
  -3  11  16   30.10    7.50
   3  11 -16   25.60    6.70
   3  11  16   25.40    6.70
  -4  11  16    5.10    5.90
   4  11 -16    0.70    6.10
   0  12 -16    3.20    3.60
   0  12  16   13.60    6.30
   1  12 -16   16.90    4.90
  -1  12  16   17.20    9.10
   1  12  16   17.00    6.00
   2  12 -16   32.10    6.10
  -2  12  16   28.10   10.20
  -3  12  16    6.70    6.00
   3  12 -16   -5.30    4.50
   3  12  16   10.20    5.40
   0  13 -16   14.50    5.70
   0  13  16   39.30    7.50
  -1  13  16   13.40    6.20
   1  13 -16   -2.00    4.10
   1  13  16    3.90    5.60
   2  13 -16   -4.70    4.60
   0   0  17   -3.50    2.30
   1   0  17   64.49    6.10
  -1   0  17   61.09    6.40
   2   0  17   17.50    3.60
  -2   0  17   10.50    4.10
   3   0  17    3.20    2.70
  -3   0  17   -3.50    5.80
  -4   0  17   13.50    5.50
   4   0  17    7.80    2.90
  -5   0  17   18.00    6.50
   5   0  17   19.00    4.10
  -6   0  17   24.90    7.30
  -7   0  17    2.10   10.40
   0  -1  17   -2.00    2.70
   0   1  17   -5.40    2.20
  -1   1  17   45.80    5.90
   1  -1  17   42.70    5.40
  -1  -1  17   43.90    5.70
   1   1  17   43.70    5.50
  -2   1  17   24.70    4.90
   2  -1  17   28.70    4.00
  -2  -1  17   22.80    4.80
   2   1  17   31.80    4.50
  -3   1  17   55.49    7.50
   3  -1  17   45.70    4.90
   3   1  17   46.40    5.50
  -4   1  17    8.20    4.60
   4  -1  17   20.90    3.20
   4   1  17   21.90    3.90
  -4  -1  17   18.20    5.70
   5  -1  17   16.40    2.80
  -5   1  17   14.20    6.40
   5   1  17   16.20    3.70
  -5  -1  17   15.60    5.50
  -6   1  17   15.80    6.70
   6   1  17    9.80    3.60
  -6  -1  17   13.40    6.30
  -7   1  17    3.60    7.30
  -7  -1  17    5.90   10.30
   0  -2  17   72.89    6.70
   0   2  17   70.09    6.90
   1  -2  17   23.00    3.90
  -1   2  17   26.50    4.80
   1   2  17   32.60    4.80
  -1  -2  17   38.30    5.30
  -2   2  17   14.90    4.30
   2  -2  17   18.20    3.20
  -2  -2  17   10.00    3.80
   2   2  17    9.30    3.30
  -3   2  17   68.39    8.40
   3  -2  17   83.09    5.60
   3   2  17   63.29    6.40
  -3  -2  17   76.29   11.80
   4  -2  17   56.69    4.30
  -4   2  17   61.59    8.40
   4   2  17   49.10    6.10
  -4  -2  17   44.40    7.10
  -5   2  17   13.90    6.10
   5   2  17   17.60    4.10
  -5  -2  17   21.60    6.20
  -6   2  17    5.30    5.20
   6   2  17    1.20    3.10
  -6  -2  17    8.00    5.80
  -7   2  17    5.80    6.70
   7   2  17    8.00    3.90
  -7  -2  17    8.20    6.60
   0   3  17    7.20    3.40
   0  -3  17   18.40    3.90
  -1   3  17   49.10    6.50
   1  -3  17   45.50    5.20
   1   3  17   37.60    5.20
  -1  -3  17   45.20    5.80
   2  -3  17  138.49    7.70
   2   3  17  116.09    8.40
  -2  -3  17  110.79    9.20
  -3   3  17   14.10    4.80
   3  -3  17    8.20    2.30
  -3  -3  17    8.10    6.40
   3   3  17   16.60    3.70
  -4   3  17   22.30    6.00
   4   3  17    7.80    3.50
  -4  -3  17   15.50    5.20
  -5   3  17   18.70    6.80
  -5  -3  17   14.00    5.50
   5   3  17   23.40    4.40
  -6   3  17   24.20    7.40
  -6  -3  17   18.10    6.90
   6   3  17   17.20    4.40
  -7   3  17   -3.80    5.40
  -7  -3  17    0.10    5.20
   0  -4  17  115.59    8.60
   0   4  17  124.69    9.00
   1  -4  17    6.20    3.60
  -1   4  17    4.70    4.00
  -1  -4  17   -0.90    3.00
   1   4  17    1.50    2.90
   2  -4  17    1.50    2.10
  -2   4  17    3.60    4.00
   2   4  17   -1.10    2.80
  -2  -4  17   -0.20    3.10
  -3   4  17   13.20    4.50
   3   4  17   15.00    3.90
  -4   4  17  111.49   10.80
   4   4  17  110.79    8.50
  -4  -4  17   97.79   10.10
  -5   4  17    5.10    5.50
   5   4  17    5.30    3.70
  -5  -4  17    3.20    5.00
  -6   4  17    4.30    5.40
   6   4  17    0.30    3.90
  -6  -4  17   -1.00    5.40
  -7   4  17    3.10    6.50
   7   4  17   -2.40    3.90
  -7  -4  17   11.20    6.30
   0  -5  17    7.70    3.40
   1  -5  17    8.20    2.90
  -1   5  17    8.40    4.10
   1   5  17   15.80    4.20
  -1  -5  17    7.70    3.30
  -2   5  17  160.08   11.40
   2  -5  17  157.78    7.60
  -2  -5  17  126.69   10.10
   2   5  17  134.79    9.80
  -3   5  17    7.00    5.20
  -3  -5  17    1.80    4.50
   3   5  17    4.60    3.40
  -4   5  17   17.20    5.90
  -4  -5  17    4.70    4.50
   4   5  17    4.90    5.80
  -5   5  17    7.60    5.90
   5   5  17    5.40    3.80
  -5  -5  17    3.30    5.50
   6   5 -17   59.49   10.20
  -6   5  17   52.69    9.40
  -6  -5  17   70.89   10.10
   6   5  17   55.99    6.90
  -7   5  17    4.30    6.70
   7   5 -17   -4.70    7.40
   7   5  17   -2.20    4.10
   0  -6  17  175.48   10.40
   0   6  17  170.78   11.80
   1  -6  17   63.39    5.50
  -1   6  17   60.69    7.80
  -1   6 -17   51.29    5.40
  -1  -6  17   48.50    6.50
   1   6  17   57.59    7.20
  -2   6  17    1.90    3.90
  -2   6 -17   -3.70    1.80
  -2  -6  17    7.70    4.20
   2   6  17    6.00    3.80
  -3   6  17   -0.50    4.30
   3   6  17   -0.80    3.40
  -3  -6  17   -0.80    3.80
  -4   6  17   54.99    8.40
   4   6 -17   48.30    8.10
   4   6  17   55.69    7.30
  -4  -6  17   36.10    6.70
   5   6 -17    1.40    6.10
  -5   6  17    1.60    5.90
   5   6  17    5.80    4.10
  -5  -6  17    5.70    5.70
   6   6 -17    3.20    7.40
   6   6  17    4.00    4.40
  -6  -6  17    1.00    6.10
   0   7  17   59.79    7.70
   0   7 -17   52.89    6.60
   0  -7  17   55.99    6.40
   1   7 -17   21.20    4.90
  -1   7  17   21.00    5.50
  -1   7 -17   22.30    3.70
  -1  -7  17   17.90    4.50
   1   7  17   21.80    5.10
  -2   7  17   83.49    8.90
   2   7 -17   89.89    9.20
   2   7  17   86.19    8.60
  -2  -7  17   88.09    8.50
  -3   7  17    5.20    5.20
   3   7 -17    6.40    4.90
  -3  -7  17   -0.60    4.00
   3   7  17    4.00    3.90
  -4   7  17   15.80    6.40
   4   7 -17   15.70    6.00
   4   7  17   18.20    4.70
  -4  -7  17   14.90    5.70
   5   7 -17    3.70    6.30
  -5   7  17    2.70    5.70
  -5  -7  17    1.60    4.50
   5   7  17   -4.10    3.80
  -6   7  17    0.10    6.10
   6   7  17   11.40    5.20
   0   8  17   42.30    7.00
   0   8 -17   50.69    6.30
  -1   8  17   12.10    4.70
   1   8 -17    9.90    4.10
  -1  -8  17   12.40    4.10
   1   8  17   13.30    4.90
  -1   8 -17   11.70    3.20
  -2   8  17   44.20    7.60
   2   8 -17   30.40    6.30
   2   8  17   34.60    6.30
  -2  -8  17   31.30    5.80
  -3   8  17   26.10    6.50
   3   8 -17   18.30    6.10
   3   8  17   34.70    6.00
  -3  -8  17   23.90    5.60
   4   8 -17   29.60    7.50
  -4   8  17   17.70    6.50
  -4  -8  17   15.70    5.80
   4   8  17   26.80    6.10
   5   8 -17    6.90    6.60
   5   8  17    1.80    4.70
  -5  -8  17   -2.40    5.00
   0   9  17   32.00    6.50
   0   9 -17   27.00    4.70
   1   9 -17   26.10    5.40
  -1   9  17   30.40    6.40
   1   9  17   22.90    5.50
  -1   9 -17   23.10    3.50
  -2   9  17   16.50    5.90
   2   9  17    7.60    4.90
   3   9 -17    9.00    5.80
  -3   9  17   13.20    5.90
   3   9  17   11.40    5.00
  -3  -9  17    7.00    4.80
   4   9 -17    4.20    5.90
  -4   9  17    9.70    6.10
  -4  -9  17   13.70    5.70
   4   9  17    7.10    4.80
   5   9 -17   15.70    7.80
  -5   9  17   23.60    7.20
  -5  -9  17   15.70    6.40
   5   9  17   24.40    5.90
   0  10  17   -0.90    4.30
   1  10 -17   22.30    5.20
  -1  10  17   31.80    6.90
   1  10  17   29.00    6.70
  -1  10 -17   14.70    3.80
   2  10 -17   -4.30    4.30
  -2  10  17   -1.00    4.70
   2  10  17   -3.60    4.60
  -3  10  17   35.90    7.50
   3  10 -17   28.10    6.90
   3  10  17   35.60    6.60
  -4  10  17   -1.10    5.50
   4  10 -17   -3.30    5.40
   4  10  17   -0.30    5.00
   0  11  17    7.00    4.70
   1  11 -17   17.70    4.90
  -1  11  17   25.80    6.90
   1  11  17   23.70    6.10
  -2  11  17    3.80    7.90
   2  11 -17   -0.90    4.60
   2  11  17    6.80    5.30
  -3  11  17   14.30    6.10
   3  11 -17   14.20    5.70
   0  12 -17   12.40    4.50
  -1  12  17    7.60    5.70
   1  12  17   14.40    5.90
   2  12 -17    4.10    4.60
  -2  12  17    0.80    5.20
   2  12  17   -3.00    5.50
   0   0  18   83.89    7.00
  -1   0  18    9.60    3.70
   1   0  18   21.70    4.20
  -2   0  18   26.80    5.20
   2   0  18   27.80    4.30
  -3   0  18   47.50    7.00
   3   0  18   58.09    5.80
  -4   0  18   28.20    6.40
   4   0  18   24.20    3.90
   5   0  18   12.80    3.10
  -5   0  18   24.00    6.50
  -6   0  18   -2.70    5.40
   6   0  18   -2.90    3.70
  -7   0  18    4.50    7.10
   0   1  18   -0.40    3.00
   0  -1  18    0.30    2.80
   1  -1  18   73.59    6.80
  -1   1  18   78.59    7.60
  -1  -1  18   79.89    7.50
   1   1  18   79.89    6.90
   2  -1  18   26.60    4.20
  -2   1  18   29.30    8.10
  -2  -1  18   35.10    5.60
   2   1  18   32.80    4.70
   3  -1  18   61.89    7.40
  -3   1  18   65.99    8.40
  -3  -1  18   55.59    7.50
   3   1  18   56.39    6.20
   4  -1  18   18.60    3.20
  -4   1  18   18.50    6.30
   4   1  18   14.70    3.80
  -4  -1  18   22.30    6.20
  -5   1  18    8.20    5.40
   5  -1  18   14.20    2.80
  -5  -1  18    8.80    5.30
   5   1  18   14.60    3.50
  -6   1  18   21.90    7.00
   6   1  18   23.80    4.20
  -6  -1  18   23.20    7.30
  -7   1  18    8.00    6.40
  -7  -1  18    7.10    6.60
   0  -2  18    9.00    3.70
   0   2  18   10.20    3.70
  -1   2  18  184.08   11.70
   1  -2  18  187.98   10.80
   1   2  18  183.28   11.00
  -1  -2  18  179.98   11.30
  -2   2  18   65.59    7.90
   2  -2  18   53.79    6.40
   2   2  18   68.89    6.50
  -2  -2  18   60.79    7.50
   3  -2  18   16.30    3.10
  -3   2  18   17.30    5.20
  -3  -2  18   28.30    5.80
   3   2  18   23.20    4.00
  -4   2  18   14.40    5.70
   4  -2  18   18.80    2.70
  -4  -2  18   15.90    5.50
   4   2  18   17.20    3.90
  -5   2  18   35.10    7.40
  -5  -2  18   30.30    7.50
   5   2  18   44.40    5.90
  -6   2  18   23.50    7.40
  -6  -2  18   22.10    7.70
   6   2  18   15.50    4.30
  -7   2  18   10.70    7.40
  -7  -2  18    9.30    6.50
   0   3  18  227.48   13.20
   0  -3  18  226.58   12.80
   1  -3  18   87.29    7.10
  -1   3  18   80.49   11.50
   1   3  18   76.09    7.50
  -1  -3  18   75.99    7.40
  -2   3  18   15.70    5.00
   2  -3  18   24.40    3.70
  -2  -3  18   21.60    4.90
   2   3  18   26.60    4.60
  -3   3  18   50.09    7.60
   3  -3  18   45.40    4.40
   3   3  18   50.49    6.30
  -3  -3  18   57.29    7.70
  -4   3  18   63.59    8.90
   4   3  18   62.39    6.80
  -4  -3  18   52.09    8.00
  -5   3  18   18.50    6.90
   5   3  18   13.80    4.00
  -5  -3  18   11.70    5.90
  -6   3  18    4.60    6.00
   6   3  18   -1.90    3.50
  -6  -3  18   -8.40    4.90
  -7   3  18   10.40    6.80
   7   3  18   -0.20    4.90
   0  -4  18   15.20    3.90
   0   4  18    7.30    5.90
   1  -4  18   17.20    3.80
  -1   4  18   19.40    5.00
   1   4  18   18.70    4.40
  -1  -4  18   18.40    4.20
   2  -4  18  184.98    9.70
  -2   4  18  202.88   12.80
  -2  -4  18  193.68   12.40
   2   4  18  182.48   11.40
  -3   4  18   33.50    6.30
   3   4  18   34.50    5.30
  -3  -4  18   30.20    5.90
  -4   4  18    6.80    5.20
  -4  -4  18    9.30    4.70
   4   4  18    9.80    3.90
  -5   4  18   -3.40    5.20
  -5  -4  18    3.70    5.60
   5   4  18   -1.70    6.10
  -6  -4  18   31.40    7.80
   6   4  18   23.00    5.00
   0  -5  18  184.88   11.20
   0   5  18  193.28   12.30
  -1   5  18   36.40    6.50
   1   5  18   42.20    6.20
  -1  -5  18   34.00    5.40
   2  -5  18   -2.10    2.20
  -2   5  18   -1.20    4.30
  -2  -5  18   -4.00    2.90
   2   5  18   -1.30    3.50
  -3   5  18   24.70    6.30
   3   5  18   11.20    4.10
  -3  -5  18   18.30    5.30
  -4   5  18  116.39   11.50
  -4  -5  18   82.79    9.30
   4   5  18   96.69    8.50
  -5   5  18   25.90    7.10
   5   5  18   19.90    5.10
  -5  -5  18   18.30    6.70
  -6   5  18    3.50    7.10
   6   5  18    5.00    4.20
   0  -6  18   77.39    7.50
   0   6  18   82.79    8.70
  -1   6  18   28.90    5.90
   1  -6  18   25.10    4.60
  -1  -6  18   30.40    5.50
  -1   6 -18   27.10    4.60
   1   6  18   36.80    6.10
  -2   6  18   94.79    9.80
   2   6  18   94.79    8.50
  -2   6 -18   86.39    5.50
  -2  -6  18   98.29    8.90
  -3   6  18   53.09    8.10
   3   6  18   42.80    6.10
  -3  -6  18   38.70    6.70
  -4   6  18    5.70    5.50
   4   6  18   -1.30    3.80
  -4  -6  18    4.00    4.90
   5   6 -18    2.30    6.70
  -5   6  18    2.60    5.70
   5   6  18    3.20    4.10
  -5  -6  18    9.20    5.50
   6   6 -18   28.70    9.40
  -6   6  18   15.40    7.90
   6   6  18   22.40    5.60
  -6  -6  18   26.20    9.40
   0   7  18   66.99    8.30
   0  -7  18   51.89    6.30
   0   7 -18   50.39    6.70
  -1   7  18   12.90    5.10
   1   7 -18    6.00    4.00
   1   7  18   17.80    4.90
  -1   7 -18   10.10    3.30
  -1  -7  18    9.80    4.30
  -2   7  18   77.59    9.30
   2   7 -18   78.59    9.40
  -2  -7  18   65.69    8.30
   2   7  18   75.89    8.20
  -3   7  18   20.60    6.40
   3   7 -18   11.40    5.60
  -3  -7  18    9.10    5.10
   3   7  18   15.20    5.00
   4   7 -18   33.20    7.60
  -4   7  18   27.60    7.30
  -4  -7  18   24.90    6.70
   4   7  18   33.10    5.90
   5   7 -18    8.40    6.80
   5   7  18    8.30    4.80
  -5  -7  18    8.60    5.60
   0   8 -18   17.90    4.50
   0   8  18   22.50    5.40
  -1   8  18   19.60    5.50
   1   8 -18   21.10    5.20
   1   8  18   15.90    5.20
  -1   8 -18   15.10    3.30
  -1  -8  18   15.10    4.40
   2   8 -18   14.80   10.00
  -2   8  18   16.10    5.60
   2   8  18   20.00    5.50
   3   8 -18    6.00    5.30
  -3   8  18   11.50    5.70
  -3  -8  18   11.60    5.20
   3   8  18    2.50    4.50
   4   8 -18   30.10    7.60
  -4   8  18   27.20    6.80
  -4  -8  18   27.80    7.00
   4   8  18   29.60    6.20
  -5   8  18   -3.30    5.60
   5   8 -18   -6.50    6.10
   5   8  18    4.00    4.70
  -5  -8  18    3.10    5.60
   0   9 -18    4.10    3.70
   0   9  18   10.60    5.10
  -1   9  18   27.30    6.30
   1   9 -18   14.30    5.00
  -1   9 -18   14.90    3.50
   1   9  18   30.00    6.10
   2   9 -18   10.00    5.30
  -2   9  18   17.40    6.30
  -2  -9  18   12.40    4.90
   2   9  18   16.00    5.40
  -3   9  18   19.60    6.70
   3   9 -18   12.40    6.10
   3   9  18    9.90    5.10
  -3  -9  18    7.70    4.90
   4   9 -18   -5.40    5.50
  -4   9  18    7.60    6.50
   4   9  18   11.50    5.30
  -4  -9  18    2.90    5.20
   0  10  18    5.30    4.90
   0  10 -18    3.40    3.90
  -1  10  18   19.70    5.80
   1  10 -18   19.40    4.90
   1  10  18   17.90    6.00
  -2  10  18    0.10    5.40
   2  10 -18    0.00    4.60
   2  10  18   -0.80    4.50
  -3  10  18   22.30   10.00
   3  10 -18   19.90    6.70
   3  10  18   17.40    5.80
   4  10 -18   -0.10    6.40
  -4  10  18   11.50    6.60
   4  10  18    2.60    7.60
   0  11 -18   -4.50    3.60
  -1  11  18   19.70   10.00
   1  11 -18   15.30    4.90
   2  11 -18    3.80    5.30
  -2  11  18    7.00    5.80
   2  11  18    1.90    8.00
  -3  11  18   23.20    7.30
   3  11 -18   18.70    6.50
   3  11  18   23.90    6.80
   0  12  18   14.90    6.10
  -1  12  18   23.00    7.00
   1  12 -18   11.50    5.90
   1  12  18   22.20    6.80
   0   0  19   -1.30    2.90
  -1   0  19   15.70    4.30
   1   0  19   14.90    3.80
   2   0  19   81.09    7.10
  -2   0  19   63.19    8.10
  -3   0  19   15.50    5.50
   3   0  19   19.60    3.90
  -4   0  19   -0.90    4.50
   4   0  19    1.00    2.70
  -5   0  19   25.50    6.90
   5   0  19   23.20    3.90
   0   1  19   36.10    5.40
   0  -1  19   31.70    5.00
   1  -1  19   65.89    6.40
  -1   1  19   53.79    6.80
   1   1  19   53.19    6.30
  -1  -1  19   51.29    6.80
  -2   1  19   -4.10    3.30
   2  -1  19   -0.10    2.90
   2   1  19    1.50    2.70
   3  -1  19   28.30    4.10
  -3   1  19   33.80    6.60
   3   1  19   29.60    4.60
  -3  -1  19   29.80    6.30
  -4   1  19   43.80    7.60
   4   1  19   62.09    6.30
  -4  -1  19   57.89    8.40
   5  -1  19   32.60    5.60
  -5   1  19   26.20    7.40
  -5  -1  19   30.60    7.40
   5   1  19   28.50    4.30
   6   1  19    8.40    3.60
  -6  -1  19    2.60    9.50
   0  -2  19   45.90    6.10
   0   2  19   41.80    6.00
   1  -2  19   66.19    6.80
  -1  -2  19   55.39    6.70
   1   2  19   63.69    7.00
  -2   2  19   26.20    5.60
   2  -2  19   32.50    4.40
   2   2  19   29.60    4.90
  -2  -2  19   30.10    8.40
   3  -2  19   85.49    6.40
  -3   2  19   83.09    9.40
  -3  -2  19   74.49    8.50
   3   2  19   80.09    7.50
  -4   2  19   17.40    6.10
   4  -2  19   16.90    2.90
  -4  -2  19   14.90    5.60
   4   2  19    9.80    3.50
  -5   2  19   34.00    7.90
  -5  -2  19   25.30    6.90
   5   2  19   22.90    4.20
  -6   2  19    2.60    9.80
   6   2  19    3.60    3.70
   0  -3  19   34.70    5.20
  -1   3  19   45.60    6.70
   1  -3  19   52.69    6.30
  -1  -3  19   53.99    6.80
   1   3  19   50.29    6.40
  -2   3  19   92.79    9.30
  -2  -3  19   84.79    9.20
   2   3  19   97.59    8.20
  -3   3  19   66.49    8.90
   3  -3  19   57.09    5.00
  -3  -3  19   60.19    7.90
   3   3  19   57.99    6.80
  -4   3  19    2.50    5.10
  -4  -3  19    0.40    4.00
   4   3  19    2.30    3.60
  -5   3  19   19.40    7.00
   5   3  19   17.80    4.60
  -5  -3  19   11.80    6.10
  -6   3  19   22.00    7.10
   0  -4  19  114.69    8.90
   0   4  19  127.29    9.90
  -1   4  19   38.60    6.60
   1  -4  19   30.30    4.80
  -1  -4  19   29.80    5.40
   1   4  19   30.00    5.80
   2  -4  19   -1.90    2.60
  -2   4  19   -3.90    3.90
  -2  -4  19   -0.70    3.80
  -3   4  19   14.60    5.60
   3  -4  19   17.50    2.60
  -3  -4  19   11.80    5.10
  -4   4  19   70.39    9.90
  -4  -4  19   72.19    9.20
   4   4  19   50.59    7.90
  -5   4  19   30.90    8.00
   5   4  19   25.90    5.30
  -5  -4  19   25.50    7.00
  -6   4  19    0.60    5.90
  -6  -4  19    4.80    6.80
   6   4  19   -4.20    4.00
   0   5  19    4.40    4.00
   0  -5  19    4.60    3.70
   1  -5  19   29.50    4.20
  -1   5  19   26.00    5.70
   1   5  19   34.40    5.70
  -1  -5  19   27.40    5.20
  -2   5  19   62.89    8.30
   2  -5  19   54.49    5.10
  -2  -5  19   64.39   11.00
   2   5  19   67.19    7.40
  -3   5  19   33.20    7.20
   3   5  19   21.30    4.90
  -3  -5  19   26.80    5.70
  -4   5  19    2.60    4.80
   4   5  19    0.30    3.80
  -4  -5  19   -5.00    4.20
  -5   5  19    7.50    6.50
  -5  -5  19    2.00    5.60
   5   5  19    5.50    4.80
  -6   5  19   31.30    8.70
  -6  -5  19   33.40    8.30
   6   5  19   18.60    5.20
   0  -6  19   30.70    5.10
   0   6  19   33.10    5.80
  -1   6  19   45.60    7.40
  -1   6 -19   31.20    7.20
  -1  -6  19   53.79    6.90
   1   6  19   48.80    6.80
  -2   6  19   19.70    6.10
  -2   6 -19   15.60    3.20
   2   6  19   20.20    5.10
  -3   6  19    4.50    5.30
   3   6  19    6.80    4.00
  -3  -6  19    3.30    4.40
  -4   6  19   21.60    7.20
  -4  -6  19   33.30    7.20
   4   6  19   28.20    5.80
   5   6 -19    6.20    7.20
  -5   6  19    0.70    8.80
   5   6  19   -1.80    4.30
  -5  -6  19    7.30    5.90
   0   7 -19   43.40    6.00
   0  -7  19   53.99    6.60
   0   7  19   47.70    7.60
  -1   7  19   14.30    5.00
   1   7 -19   14.00    4.90
   1   7  19    8.90    4.60
  -1  -7  19   10.10    4.50
  -2   7  19   41.60    7.50
   2   7 -19   33.90    6.90
  -2  -7  19   40.10    6.70
   2   7  19   29.50    5.50
  -3   7  19    4.60    5.30
   3   7 -19   -2.50    4.80
  -3  -7  19   -3.70    4.00
   3   7  19    2.90    4.20
  -4   7  19    9.00    6.50
   4   7 -19    4.50    6.20
   4   7  19    8.70    5.10
  -4  -7  19    5.50    5.50
   5   7 -19   -0.40    6.70
  -5   7  19    2.10    6.40
  -5  -7  19    2.90    5.10
   5   7  19    5.40    5.00
   0   8  19   11.80    5.10
   0  -8  19    9.80    4.00
   0   8 -19   19.20    4.90
  -1   8  19   23.20    6.50
   1   8 -19   15.80    5.10
  -1   8 -19   15.70    4.50
   1   8  19   13.00    5.50
  -1  -8  19   25.30    5.30
   2   8 -19   12.60    5.80
  -2   8  19   19.30    6.10
   2   8  19   19.10    5.80
  -2  -8  19   20.30    5.40
   3   8 -19    8.70    5.60
  -3   8  19   10.80    5.80
  -3  -8  19    5.80    5.10
   3   8  19   12.60    5.40
   4   8 -19    7.20    6.40
  -4   8  19    9.80    6.40
  -4  -8  19    8.60    5.80
   4   8  19   26.40    6.00
   0   9 -19   -5.80    3.80
   0   9  19    2.50    4.80
   1   9 -19    4.50    4.50
  -1   9  19   20.00    6.10
   1   9  19    9.50    5.10
  -2   9  19    4.10    4.90
   2   9 -19   -2.80    4.70
  -2  -9  19   -2.20    4.00
   2   9  19    4.00    4.90
   3   9 -19   22.90    7.00
  -3   9  19   18.60    9.30
  -3  -9  19   20.40    6.00
   3   9  19   26.00    6.20
   4   9 -19    6.70    6.60
  -4   9  19   17.80    7.10
  -4  -9  19    8.40    5.70
   4   9  19    7.40    5.40
   0  10  19    2.40    5.10
   1  10 -19   17.20    5.30
   1  10  19   30.10    6.70
  -2  10  19   19.00    6.60
   2  10 -19    2.60    5.20
   2  10  19   13.30    9.20
  -3  10  19   18.60    6.70
   3  10 -19   21.90    6.50
   3  10  19   18.80    9.60
   0  11  19    8.30    5.80
  -1  11  19   20.60    6.60
   1  11  19   32.70    7.40
   2  11 -19   -2.80    5.30
  -2  11  19   11.20    6.10
   2  11  19   -2.00    5.40
   0   0  20  173.98   11.30
   1   0  20   12.10    3.70
  -2   0  20    3.00    3.70
   2   0  20   12.70    3.80
  -3   0  20   16.50    5.40
   3   0  20   17.30    4.00
   4   0  20   13.10    3.60
  -4   0  20   11.20    6.10
  -5   0  20   40.70    8.50
   5   0  20   28.00    4.40
  -6   0  20    4.40    6.00
   0   1  20    2.90    3.40
   0  -1  20   -1.70    2.90
   1  -1  20   38.70    5.50
  -1   1  20   42.80    6.40
  -1  -1  20   49.30    6.60
   1   1  20   49.80    6.50
  -2   1  20   81.69    8.70
   2  -1  20   83.79    7.40
  -2  -1  20   89.79    8.80
   2   1  20   86.79    7.70
   3  -1  20   42.60    5.50
  -3   1  20   37.50    6.80
   3   1  20   39.70    5.30
  -3  -1  20   39.20    6.70
   4  -1  20    1.90    3.30
  -4   1  20    2.70    5.30
   4   1  20    1.60    3.10
  -4  -1  20    3.40    5.00
  -5   1  20    0.70    6.20
   5   1  20    7.80    3.40
  -5  -1  20   10.80    6.10
  -6   1  20   16.90    7.40
  -6  -1  20    2.70    6.20
   0  -2  20   54.09    6.60
   1  -2  20   81.89    7.80
  -1   2  20   84.09    8.70
  -1  -2  20   77.69    8.00
   1   2  20   84.29    7.90
  -2   2  20   20.90    5.50
   2  -2  20   17.60    4.10
  -2  -2  20   11.70    4.40
   2   2  20   21.90    4.50
  -3   2  20   54.79    8.40
   3   2  20   59.59    6.80
  -3  -2  20   47.20    7.20
  -4   2  20   33.50    7.70
   4  -2  20   26.90    4.80
   4   2  20   30.10    4.90
  -4  -2  20   22.10    6.50
  -5   2  20   22.10    7.40
   5   2  20   28.40    4.70
  -5  -2  20   19.30    6.70
  -6   2  20    3.70    6.10
  -6  -2  20    9.20    6.20
   6   2  20    7.50    4.00
   0   3  20   90.49    8.60
   0  -3  20   89.79    8.00
  -1   3  20   87.39    8.70
   1  -3  20   83.29    7.60
   1   3  20   88.99   13.00
  -1  -3  20   75.59    8.00
   2  -3  20   15.10    3.50
  -2   3  20   14.60    5.10
   2   3  20   16.30    4.80
  -2  -3  20   17.30    4.90
   3  -3  20   38.60    4.60
  -3   3  20   34.50    7.00
  -3  -3  20   31.20    6.20
   3   3  20   41.30    5.90
  -4   3  20   45.90    8.30
   4   3  20   46.50    6.40
  -4  -3  20   71.19    9.40
  -5   3  20   24.10    7.90
  -5  -3  20   26.90    7.30
  -6   3  20    4.00    6.60
   6   3  20    0.80    4.00
  -6  -3  20   -4.90    5.80
   0   4  20   -4.70    3.40
   0  -4  20    1.90    3.30
   1  -4  20   33.20    5.10
  -1   4  20   43.10    6.90
   1   4  20   40.40    6.20
  -1  -4  20   46.00    6.30
   2  -4  20  117.89    9.10
  -2   4  20  130.49   11.20
  -2  -4  20  132.89   10.30
   2   4  20  135.39    9.90
  -3   4  20   30.70    6.90
   3   4  20   37.20    5.80
  -3  -4  20   39.50    6.80
  -4   4  20   -0.20    5.20
  -4  -4  20    2.60    4.90
   4   4  20    6.40    4.20
   5   4  20    8.50    4.50
  -5  -4  20   17.50    7.00
   0   5  20  101.19    9.50
   0  -5  20  120.19    9.10
  -1   5  20   50.89    7.80
   1  -5  20   53.39    6.20
   1   5  20   49.00    6.90
  -1  -5  20   64.29    7.50
   2  -5  20    5.90    2.70
  -2   5  20    6.20    4.70
  -2  -5  20    5.70    4.20
   2   5  20   10.20    4.10
  -3   5  20   28.20    7.00
  -3  -5  20   31.00    6.10
   3   5  20   23.30    5.20
  -4   5  20   29.60    7.50
  -4  -5  20   37.20    7.50
   4   5  20   39.70    6.20
  -5   5  20   35.00    8.70
  -5  -5  20   14.60    6.60
   5   5  20   24.30    5.90
   0  -6  20   -0.70    3.30
   0   6  20    7.10    4.50
   1  -6  20   52.49    6.20
  -1   6  20   65.59    8.90
  -1  -6  20   60.19    7.70
   1   6  20   70.39    7.80
  -1   6 -20   46.40    6.20
  -2   6  20   34.20    7.00
  -2  -6  20   53.19    7.20
   2   6  20   36.20    6.30
  -3   6  20   45.40    8.40
  -3  -6  20   39.80    7.30
   3   6  20   40.10    6.40
  -4   6  20   -1.60    6.70
   4   6  20   -1.50    4.00
  -4  -6  20    2.50    5.10
  -5   6  20    3.90    6.30
   5   6 -20    7.40   11.10
  -5  -6  20    2.50    7.30
   5   6  20    3.20    5.00
   0  -7  20   40.70    5.40
   0   7  20   38.50    7.20
   0   7 -20   32.00    5.60
  -1   7  20   57.89    8.40
   1   7 -20   44.30    6.80
  -1   7 -20   37.20    6.80
  -1  -7  20   46.80    6.40
   1   7  20   41.20    6.90
  -2   7  20    8.80    5.80
   2   7 -20    7.30    5.00
   2   7  20    5.90    4.50
  -2  -7  20    1.00    4.50
  -3   7  20   17.60    6.70
   3   7 -20   12.60    6.00
  -3  -7  20    7.10    5.10
   3   7  20   15.50    5.30
   4   7 -20    7.30    6.70
  -4   7  20   13.10    7.00
   4   7  20    9.40    4.90
  -4  -7  20   18.30    6.70
   0   8  20    9.10    5.50
   0   8 -20   15.90    4.70
   0  -8  20    6.20    3.60
  -1   8  20   13.90    5.90
   1   8 -20    4.70    4.90
  -1  -8  20   13.90    4.60
   1   8  20   12.90    5.20
   2   8 -20    4.10    5.30
  -2   8  20    3.20    5.40
   2   8  20   11.70    4.60
  -2  -8  20   10.00    4.60
   3   8 -20   10.00    6.40
  -3   8  20   10.90   10.60
  -3  -8  20   12.70    5.40
   3   8  20    8.80    5.10
  -4   8  20   23.90    7.20
   4   8 -20   25.60    7.90
   4   8  20   15.90    6.10
  -4  -8  20   29.50    7.20
   0   9  20   -1.00    4.80
   1   9 -20   -7.70    4.50
  -1   9  20    6.00    5.70
   1   9  20    2.90    4.80
  -2   9  20   28.80    8.10
   2   9 -20   25.60    6.40
   2   9  20   38.80    7.00
  -2  -9  20   40.70    6.70
  -3   9  20   10.80    6.10
   3   9 -20    6.40    5.80
  -3  -9  20    8.70    5.50
   3   9  20    0.30    6.60
   0  10  20   45.10    7.90
  -1  10  20   13.50    6.00
   1  10  20   11.30    5.90
  -2  10  20   11.30    6.40
   2  10 -20   -2.00    5.30
   2  10  20    4.70    5.10
   0   0  21   -0.60    3.30
  -1   0  21    5.50    4.10
   1   0  21    8.50    3.80
  -2   0  21   34.90    6.60
   2   0  21   31.70    5.00
  -3   0  21    2.00    4.50
   3   0  21    3.50    3.30
  -4   0  21   -6.50    4.20
   4   0  21   -5.70    2.80
  -5   0  21    5.40    8.60
   0  -1  21   61.59    7.20
   0   1  21   66.99    8.00
  -1   1  21   19.40    5.10
   1  -1  21   21.10    4.60
  -1  -1  21   22.70    5.20
   1   1  21   18.30    4.60
  -2   1  21   -1.20    3.50
   2  -1  21   -2.30    3.00
   2   1  21    2.90    3.50
  -2  -1  21   -0.80    3.60
  -3   1  21    8.30    5.40
   3  -1  21    7.70    3.30
   3   1  21   11.00    3.90
  -3  -1  21    3.40    3.90
  -4   1  21   34.60    7.40
   4  -1  21   30.50    4.30
  -4  -1  21   45.30    8.60
   4   1  21   33.10    4.90
  -5  -1  21   13.50    7.00
   5   1  21    9.20    3.70
   0  -2  21    4.20    3.70
   0   2  21    7.50    4.10
  -1   2  21   48.30    6.90
   1  -2  21   36.70    5.40
   1   2  21   32.50    7.40
   2  -2  21   51.69    6.40
  -2   2  21   59.79    8.20
  -2  -2  21   54.99    7.60
   2   2  21   57.39    7.10
  -3   2  21   37.30    7.60
   3  -2  21   32.40    4.60
  -3  -2  21   49.20    7.60
   3   2  21   37.00    5.70
  -4   2  21    7.80    6.20
  -4  -2  21   13.20    5.30
   4   2  21   10.00    3.90
  -5   2  21   11.00    9.90
  -5  -2  21   17.60    8.30
   5   2  21   17.10    4.40
   0  -3  21   20.80    4.70
   0   3  21   17.80    5.00
   1  -3  21   48.30    6.20
  -1   3  21   58.09    7.80
   1   3  21   69.09    7.60
  -1  -3  21   64.59    8.60
  -2   3  21   36.80    7.20
   2  -3  21   32.10    4.50
  -2  -3  21   37.10    6.40
   2   3  21   36.40    5.70
   3  -3  21   27.00    3.90
  -3   3  21   36.00    7.80
   3   3  21   38.00    5.90
  -3  -3  21   36.90    7.20
  -4   3  21   17.60    6.80
   4   3  21    9.70    4.20
  -4  -3  21    2.80    4.80
  -5   3  21   10.60    6.40
  -5  -3  21   20.80    8.90
   5   3  21   18.60    4.50
   0  -4  21   92.69    8.40
   0   4  21   88.19    9.20
  -1   4  21   46.00    7.30
   1  -4  21   36.30    5.20
   1   4  21   44.70    6.50
  -1  -4  21   50.59    6.90
  -2   4  21    9.50    5.20
  -2  -4  21    0.80    3.90
   2   4  21    6.70    3.80
  -3   4  21   38.10    7.40
  -3  -4  21   43.60    7.50
   3   4  21   38.80    6.10
  -4   4  21   25.60    7.40
   4   4  21   24.50    5.30
  -4  -4  21   34.30    7.60
  -5   4  21   30.70    8.70
   5   4  21   28.90    5.30
   0  -5  21    7.80    4.00
   0   5  21    6.20    4.30
  -1   5  21   46.60    7.60
   1  -5  21   61.99    6.70
   1   5  21   48.70    6.90
  -1  -5  21   50.79    7.20
   2  -5  21   58.79    6.60
  -2   5  21   77.69   10.20
   2   5  21   78.79    8.60
  -2  -5  21   45.70    7.30
  -3   5  21   35.40    7.70
  -3  -5  21   37.20    7.00
   3   5  21   27.40    5.70
   4   5  21    1.20    4.30
  -4  -5  21    2.90    5.10
   5   5  21   19.30    5.90
   0   6  21   40.00    7.00
   0  -6  21   41.00    5.60
   1  -6  21   28.00    4.60
  -1   6  21   26.60    6.90
   1   6  21   42.90    6.80
  -1   6 -21   32.40    5.10
  -1  -6  21   41.90    6.70
  -2   6  21   -0.50    4.90
  -2  -6  21   -1.70    4.40
   2   6  21    0.80    4.20
  -3   6  21   32.80    7.70
   3   6  21   33.60    6.20
  -3  -6  21   24.00    6.30
  -4   6  21   10.50    6.50
   4   6  21   13.50    5.20
  -4  -6  21    7.70    5.70
   0   7  21    8.40    4.70
   0   7 -21    2.90    4.20
   0  -7  21    1.70    3.40
  -1   7  21   32.10    6.90
   1  -7  21   22.30    5.00
   1   7 -21   19.60    5.70
   1   7  21   22.30    5.60
  -1   7 -21   12.40    5.10
  -1  -7  21   14.00    4.50
   2   7 -21    0.90    4.70
  -2   7  21   17.70    6.80
   2   7  21   20.20    5.70
  -2  -7  21    7.20    5.20
  -3   7  21    8.10    7.60
   3   7 -21    4.80    5.90
  -3  -7  21    5.30    5.50
   3   7  21   22.50    5.80
   4   7 -21   -6.50    6.50
  -4   7  21    5.90    6.60
  -4  -7  21   -4.80    4.90
   4   7  21    5.80    4.80
   0   8 -21   -9.40    4.10
   0   8  21    0.90    4.90
   0  -8  21   -6.70    3.20
  -1   8  21    0.90    5.30
   1   8 -21  -12.80    6.60
  -1  -8  21   -0.60    4.30
   1   8  21   -0.90    4.60
   2   8 -21   15.20    5.90
  -2   8  21    9.90    6.70
   2   8  21   17.70    5.60
  -2  -8  21   12.90    5.10
   3   8 -21    3.90    6.10
  -3   8  21   13.40    6.70
   3   8  21   20.30    5.90
  -3  -8  21    7.20    5.70
   0   9 -21   14.60    5.70
   0   9  21   29.20   11.80
  -1   9  21    2.40    5.40
   2   9 -21   -4.20    5.40
  -2   9  21    3.60    5.80
   2   9  21    1.20    7.70
  -2  -9  21   -7.90    3.90
   0   0  22   67.19    7.80
   1   0  22   11.30    4.30
  -1   0  22    7.10    4.30
  -2   0  22   -7.40    3.70
   2   0  22    2.10    3.20
   3   0  22    1.50    3.20
  -3   0  22   -3.20    4.10
  -4   0  22   26.20    7.30
   4   0  22   27.50    4.50
  -5   0  22    8.10    6.60
   0   1  22    2.40    3.80
  -1   1  22   11.50    4.70
   1  -1  22    4.10    3.90
   1   1  22   10.20    4.60
  -1  -1  22   14.90    4.90
   2  -1  22   69.69    6.80
  -2   1  22   73.69    8.90
   2   1  22   57.99    7.30
  -2  -1  22   57.79    8.00
  -3   1  22   17.90    6.00
   3  -1  22   12.50    3.70
   3   1  22   16.40    4.20
  -3  -1  22    6.30    5.40
  -4   1  22   -1.80    5.00
  -4  -1  22    6.60    5.10
   4   1  22   -1.20    3.50
  -5   1  22   -5.30    6.10
  -5  -1  22   -7.10    5.20
   0  -2  22   61.79    7.60
   0   2  22   62.89    7.90
   1  -2  22   29.10    5.10
  -1   2  22   25.10    5.90
  -1  -2  22   26.20    5.60
   1   2  22   28.90    5.40
  -2   2  22    3.60    5.10
   2  -2  22    7.10    3.50
   2   2  22   13.90    4.40
  -2  -2  22    5.20    4.40
   3  -2  22   29.50    4.70
  -3   2  22   26.90    6.80
  -3  -2  22   32.40    7.00
  -4   2  22   26.60    7.40
   4   2  22   12.20    4.90
  -4  -2  22   28.70    7.00
  -5   2  22    2.70    5.80
  -5  -2  22    2.30    6.00
   5   2  22    8.60    4.90
   0   3  22   -0.20    4.10
   0  -3  22    5.70    4.10
  -1   3  22   48.50    7.30
   1  -3  22   41.20    5.80
   1   3  22   47.70    6.60
  -1  -3  22   46.50    6.90
  -2   3  22   22.80    6.50
   2  -3  22   17.40    4.20
  -2  -3  22   14.10    5.10
   2   3  22   13.50    4.80
  -3   3  22   12.20    5.90
  -3  -3  22   10.40    5.60
   3   3  22    7.80    4.40
  -4  -3  22    6.00    5.60
   4   3  22    9.10    4.20
   0   4  22    5.70    4.50
   0  -4  22   12.40    4.20
  -1   4  22   33.60    6.70
   1  -4  22   30.90    4.90
  -1  -4  22   26.50    5.80
   1   4  22   29.00    5.80
  -2   4  22   10.60    5.20
   2  -4  22    7.00    3.50
  -2  -4  22   13.80    5.20
   2   4  22   14.10    4.70
  -3   4  22   22.30    6.90
   3   4  22   27.40    5.40
  -3  -4  22   20.80    6.30
  -4   4  22    4.00    5.90
   4   4  22    7.00    4.40
  -4  -4  22   -1.00    5.30
   0  -5  22   10.30    4.00
   0   5  22   15.50    5.40
   1  -5  22   19.50    4.20
  -1   5  22   20.70    6.10
  -1  -5  22   22.10    5.30
   1   5  22   25.20    5.60
  -2   5  22   -0.80    5.00
   2   5  22    3.40    4.30
  -2  -5  22    1.30    4.20
  -3   5  22   33.90   10.00
   3   5  22   28.10    6.00
  -3  -5  22   18.20    6.10
  -4   5  22    2.10    6.20
   4   5  22    1.60    4.70
  -4  -5  22    4.90    5.50
   0  -6  22   -5.70    3.50
   0   6  22    9.60    5.20
  -1   6  22   12.00    5.70
   1  -6  22    6.30    3.70
  -1   6 -22    3.50    4.10
  -1  -6  22    5.20    4.80
   1   6  22   11.30    5.10
  -2   6  22   11.60    6.40
   2   6  22   10.60    5.20
  -2  -6  22    3.00    4.70
  -3   6  22   25.20    6.90
  -3  -6  22   28.60    6.90
   3   6  22   12.50    5.40
   0  -7  22   -9.10    3.40
   0   7  22    6.70    5.30
   0   7 -22   -6.60    4.20
  -1   7  22   20.60    6.60
   1   7 -22   16.00    5.80
   1   7  22   23.90    6.00
  -1  -7  22    9.60    4.80
   2   7 -22  -10.80    4.60
  -2   7  22   -1.80    6.50
  -2  -7  22   -1.80    4.20
   2   7  22   -0.50    4.50
   3   7 -22   -6.30    5.40
  -3   7  22   -0.50    5.80
   3   7  22    1.70    5.00
  -3  -7  22   -3.40    5.20
   0   8 -22   -0.80    5.20
   0  -8  22    7.30    4.20
  -1   8  22   11.10    6.20
  -1  -8  22    1.80    4.10
   2   8 -22   -8.10    5.00
  -2   8  22   -0.20    6.10
  -2  -8  22   -4.10    4.40
   0   0  23    0.50    3.70
   1   0  23    3.50    3.90
  -1   0  23   -3.60    3.50
   2   0  23   45.90    6.10
  -2   0  23   53.49    8.10
  -3   0  23    2.80    5.40
   3   0  23    9.00    3.80
   0  -1  23   63.69    8.10
   0   1  23   84.09    8.50
  -1   1  23    5.50    4.30
   1  -1  23    7.90    4.00
   1   1  23    9.70    4.20
  -1  -1  23    7.10    4.20
  -2   1  23    0.30    4.50
   2  -1  23   -3.90    3.40
  -2  -1  23   -0.80    4.50
   2   1  23   -6.90    3.30
   3  -1  23    0.50    3.40
  -3   1  23    2.40    5.10
   3   1  23    1.00    4.00
  -3  -1  23    1.20    4.70
  -4   1  23   33.40   10.20
  -4  -1  23   30.50   10.70
   4   1  23   27.10    5.00
   0   2  23   -3.60    3.80
   0  -2  23   -1.10    3.70
   1  -2  23   26.10    5.10
  -1   2  23   32.10    6.20
   1   2  23   31.00    5.80
  -1  -2  23   29.20    6.10
   2  -2  23   36.40    5.20
  -2   2  23   38.20    7.30
  -2  -2  23   45.50    7.00
   2   2  23   40.20    6.10
  -3   2  23   11.50    6.10
   3   2  23   11.90    4.50
  -3  -2  23   25.60    6.50
  -4   2  23   -0.10    5.60
   4   2  23   -3.80    3.60
  -4  -2  23    5.70    6.70
   0   3  23   24.10    5.50
   1  -3  23   22.00    4.80
  -1   3  23   22.60    5.40
   1   3  23   23.60    5.50
  -1  -3  23   19.40    5.50
   2  -3  23    6.60    3.70
  -2   3  23    6.20    5.10
  -2  -3  23    0.80    3.80
   2   3  23   10.20    4.50
  -3   3  23   20.40    7.50
  -3  -3  23    8.60    5.40
   3   3  23    7.80    4.50
  -4   3  23   30.70    8.00
   4   3  23   15.10    4.80
  -4  -3  23   16.40    9.90
   0   4  23    4.00    4.60
   0  -4  23    8.80    4.70
   1  -4  23    0.10    3.40
  -1   4  23    7.20    5.30
   1   4  23   11.60    5.00
  -1  -4  23    9.30    4.60
  -2   4  23   14.90    6.00
   2   4  23   10.40    4.80
  -2  -4  23    0.20    4.30
  -3   4  23    6.70   10.30
  -3  -4  23    5.60    5.30
   3   4  23   11.40    5.00
   0  -5  23    0.90    3.70
   0   5  23   -2.20    4.40
   1  -5  23    3.40    3.60
  -1   5  23   12.70    5.40
   1   5  23    3.90    5.00
  -1  -5  23    0.60    4.10
  -2   5  23   -1.90    6.10
  -2  -5  23    3.20    4.40
   2   5  23   -1.30    4.50
  -3   5  23    4.50    6.00
   3   5  23    6.00    5.30
  -3  -5  23   -4.90    4.70
   0   6  23    3.70    5.00
   0  -6  23   -5.60    3.70
  -1   6  23    4.80    6.20
   1   6  23    9.00    5.30
  -2   6  23    0.50    5.80
  -2  -6  23   -0.50    4.50
   2   6  23   -2.40    4.70
   0  -7  23    2.90    4.10
   0   7 -23    4.60    5.40
  -1   7  23    4.30    5.50
   1   7 -23    1.00    5.10
   1   7  23   11.10    7.10
   0   0  24   15.30    4.70
  -1   0  24    4.00    4.70
   1   0  24    2.60    3.70
   2   0  24    1.60    4.10
  -2   0  24    4.00    4.80
  -3   0  24    0.00    4.80
   3   0  24   -6.90    3.20
   0  -1  24   -8.20    4.00
   0   1  24   -0.90    3.90
  -1   1  24   -3.00    4.20
   1  -1  24   -3.00    3.80
  -1  -1  24   -2.10    3.70
   1   1  24   -2.20    3.80
  -2   1  24   34.10    6.90
   2  -1  24   21.90    4.70
   2   1  24   31.90    5.40
  -2  -1  24   21.40    5.60
   3  -1  24   -8.40    4.60
  -3   1  24    2.10    6.50
   3   1  24    0.60    3.80
  -3  -1  24   -6.40    4.20
   0   2  24   47.40    7.40
   0  -2  24   48.20    6.70
   1  -2  24    8.40    4.50
  -1   2  24   -1.50    4.30
   1   2  24    6.70    4.40
  -1  -2  24   11.70    4.80
   2  -2  24    2.30    3.60
  -2   2  24    5.00    5.20
   2   2  24    4.10    4.30
  -2  -2  24    2.10    4.90
  -3  -2  24    5.40    5.70
   3   2  24   11.70    4.30
   0  -3  24    3.70    4.30
   0   3  24    4.50    4.30
   1  -3  24   26.60    4.80
  -1   3  24   20.80    5.90
   1   3  24   25.20    6.10
  -1  -3  24   15.00    5.10
   2  -3  24   18.60    7.00
  -2   3  24   19.60    6.30
  -2  -3  24   24.60    6.30
   2   3  24   23.30    5.70
  -3   3  24    1.30    5.50
   3   3  24    1.80    4.00
   0   4  24    4.30    5.00
   0  -4  24   -2.60    3.60
  -1   4  24   21.70    6.10
   1  -4  24    8.60    4.30
   1   4  24   10.00    5.20
  -1  -4  24   -1.50    3.90
   2   4  24    3.60    5.00
  -2  -4  24    2.70    5.00
   0   5  24   -7.10    4.30
  -1   5  24   -5.30    6.90
   1   5  24   -2.70    4.90
  -1  -5  24   -5.20    3.60
   0   0  25   -0.10    4.40
  -1   0  25   -1.70    4.50
   1   0  25   -2.60    3.50
   2   0  25   -4.20    3.20
  -2   0  25   -1.40    4.50
   0  -1  25   -5.70    3.80
   0   1  25   -1.20    4.30
  -1   1  25   -7.70    4.00
   1  -1  25   -8.30    3.50
   1   1  25   -5.90    3.70
  -1  -1  25    0.00    5.00
  -2   1  25    1.80    5.30
   2   1  25   -2.10    3.90
  -2  -1  25   -1.60    4.60
   0   2  25   -2.60    4.40
   0  -2  25    0.30    3.90
   1  -2  25   -2.70    3.80
  -1   2  25    2.50    4.90
  -1  -2  25    6.60    5.40
   1   2  25    1.60    4.70
   0   3  25   10.80    5.50
   0  -3  25   10.00    4.50
  -1   3  25   13.00    5.70
   1   3  25   10.00    5.30
  -1  -3  25   15.00    5.40
   0   0   0    0.00    0.00

_computing_structure_solution     'SHELXT 2014/5 (Sheldrick, 2014)'
;
_shelx_hkl_checksum                14512
_olex2_submission_special_instructions  'No special instructions were received'
