# Supplementary material for: A Highly Selective Turn-On Fluorescent Probe for the Detection of Zinc
Source: Molecules. 2021 Jun 23;26(13):3825. doi: 10.3390/molecules26133825 (PMC8270291; doi:10.3390/molecules26133825)
Supplement: Supplementary file 1 [file molecules-26-03825-s001.zip › Crystal/L.cif]

data_1_L
_audit_creation_date               2021-03-02
_audit_creation_method
;
Olex2 1.2
(compiled 2018.05.29 svn.r3508 for OlexSys, GUI svn.r5506)
;
_shelx_SHELXL_version_number       '2014/7'
_audit_contact_author_address      ?
_audit_contact_author_email        ?
_audit_contact_author_name         ''
_audit_contact_author_phone        ?
_publ_contact_author_id_orcid      ?
_publ_section_references
;
Dolomanov, O.V., Bourhis, L.J., Gildea, R.J, Howard, J.A.K. & Puschmann, H.
 (2009), J. Appl. Cryst. 42, 339-341.

Sheldrick, G.M. (2008). Acta Cryst. A64, 112-122.
;
_chemical_name_common              ?
_chemical_name_systematic          ?
_chemical_formula_moiety           'C19 H27 N2 O3, 0.5(O)'
_chemical_formula_sum              'C19 H27 N2 O3.50'
_chemical_formula_weight           339.42
_chemical_absolute_configuration   unk
_chemical_melting_point            ?
loop_
  _atom_type_symbol
  _atom_type_description
  _atom_type_scat_dispersion_real
  _atom_type_scat_dispersion_imag
  _atom_type_scat_source
 'C' 'C' 0.0033 0.0016 'International Tables Vol C Tables 4.2.6.8 and 6.1.1.4'
 'H' 'H' 0.0000 0.0000 'International Tables Vol C Tables 4.2.6.8 and 6.1.1.4'
 'N' 'N' 0.0061 0.0033 'International Tables Vol C Tables 4.2.6.8 and 6.1.1.4'
 'O' 'O' 0.0106 0.0060 'International Tables Vol C Tables 4.2.6.8 and 6.1.1.4'

_shelx_space_group_comment
;
The symmetry employed for this shelxl refinement is uniquely defined
by the following loop, which should always be used as a source of
symmetry information in preference to the above space-group names.
They are only intended as comments.
;
_space_group_crystal_system        'tetragonal'
_space_group_IT_number             94
_space_group_name_H-M_alt          'P 42 21 2'
_space_group_name_Hall             'P 4n 2n'
loop_
  _space_group_symop_operation_xyz
 'x, y, z'
 '-y+1/2, x+1/2, z+1/2'
 '-x, -y, z'
 'y+1/2, -x+1/2, z+1/2'
 'x+1/2, -y+1/2, -z+1/2'
 'y, x, -z'
 '-x+1/2, y+1/2, -z+1/2'
 '-y, -x, -z'

_cell_length_a                     17.989(2)
_cell_length_b                     17.989(2)
_cell_length_c                     12.862(2)
_cell_angle_alpha                  90
_cell_angle_beta                   90
_cell_angle_gamma                  90
_cell_volume                       4162.2(11)
_cell_formula_units_Z              8
_cell_measurement_reflns_used      3279
_cell_measurement_temperature      293(2)
_cell_measurement_theta_max        24.82
_cell_measurement_theta_min        2.53
_shelx_estimated_absorpt_T_max     0.991
_shelx_estimated_absorpt_T_min     0.983
_exptl_absorpt_coefficient_mu      0.075
_exptl_absorpt_correction_T_max   0.7455
_exptl_absorpt_correction_T_min    0.6073
_exptl_absorpt_correction_type    multi-scan 
_exptl_absorpt_process_details     ?
_exptl_absorpt_special_details     ?
_exptl_crystal_colour               Yellow
_exptl_crystal_density_diffrn      1.083
_exptl_crystal_density_meas         'not measured' 
_exptl_crystal_density_method      ?
_exptl_crystal_description        Block 
_exptl_crystal_F_000               1464
_exptl_crystal_size_max            0.23
_exptl_crystal_size_mid            0.15
_exptl_crystal_size_min            0.12
_exptl_transmission_factor_max     ?
_exptl_transmission_factor_min     ?
_diffrn_reflns_av_R_equivalents    0.1916
_diffrn_reflns_av_unetI/netI       0.0769
_diffrn_reflns_Laue_measured_fraction_full  0.974
_diffrn_reflns_Laue_measured_fraction_max  0.974
_diffrn_reflns_limit_h_max         21
_diffrn_reflns_limit_h_min         -21
_diffrn_reflns_limit_k_max         21
_diffrn_reflns_limit_k_min         -21
_diffrn_reflns_limit_l_max         12
_diffrn_reflns_limit_l_min         -14
_diffrn_reflns_number              43237
_diffrn_reflns_point_group_measured_fraction_full  0.980
_diffrn_reflns_point_group_measured_fraction_max  0.980
_diffrn_reflns_theta_full          24.992
_diffrn_reflns_theta_max           24.992
_diffrn_reflns_theta_min           2.264
_diffrn_ambient_temperature        293(2)
_diffrn_detector_area_resol_mean   ?
_diffrn_measured_fraction_theta_full  0.974
_diffrn_measured_fraction_theta_max  0.974
_diffrn_measurement_device_type   'Bruker APEX-II CCD'
_diffrn_measurement_method          '\f and \w scans'
_diffrn_radiation_type             MoK\a
_diffrn_radiation_wavelength       0.71073
_diffrn_source                     ?
_reflns_Friedel_coverage           0.728
_reflns_Friedel_fraction_full      0.987
_reflns_Friedel_fraction_max       0.987
_reflns_number_gt                  1749
_reflns_number_total               3594
_reflns_special_details
;
 Reflections were merged by SHELXL according to the crystal
 class for the calculation of statistics and refinement.
 
 Structure factors included contributions from the .fab file.
 
 _reflns_Friedel_fraction is defined as the number of unique
 Friedel pairs measured divided by the number that would be
 possible theoretically, ignoring centric projections and
 systematic absences.
;
_reflns_threshold_expression       'I > 2\s(I)'
_computing_cell_refinement         ?
_computing_data_collection         ?
_computing_data_reduction          ?
_computing_molecular_graphics      'Olex2 (Dolomanov et al., 2009)'
_computing_publication_material    'Olex2 (Dolomanov et al., 2009)'
_computing_structure_refinement    'XL (Sheldrick, 2008)'
_computing_structure_solution      ?
_refine_diff_density_max           0.383
_refine_diff_density_min           -0.818
_refine_diff_density_rms           0.086
_refine_ls_abs_structure_details
;
 Refined as an inversion twin.
;
_refine_ls_abs_structure_Flack     -2(6)
_refine_ls_extinction_coef         .
_refine_ls_extinction_method       none
_refine_ls_goodness_of_fit_ref     1.024
_refine_ls_hydrogen_treatment      constr
_refine_ls_matrix_type             full
_refine_ls_number_parameters       226
_refine_ls_number_reflns           3594
_refine_ls_number_restraints       1
_refine_ls_R_factor_all            0.2233
_refine_ls_R_factor_gt             0.1018
_refine_ls_restrained_S_all        1.708
_refine_ls_shift/su_max            0.000
_refine_ls_shift/su_mean           0.000
_refine_ls_structure_factor_coef   Fsqd
_refine_ls_weighting_details      
 'w=1/[\s^2^(Fo^2^)+(0.2000P)^2^] where P=(Fo^2^+2Fc^2^)/3'
_refine_ls_weighting_scheme        calc
_refine_ls_wR_factor_gt            0.2793
_refine_ls_wR_factor_ref           0.3231
_refine_special_details
;
 Refined as a 2-component inversion twin.
;
_olex2_refinement_description
;
1. Twinned data refinement
 Scales: 3(6)
 -2(6)
2. Fixed Uiso
 At 1.2 times of:
  All C(H) groups, All C(H,H) groups, All N(H) groups
 At 1.5 times of:
  All C(H,H,H) groups, All O(H) groups
3. Restrained distances
 O2-O4
 3.52 with sigma of 0.02
4.a Ternary CH refined with riding coordinates:
 C5(H5), C6(H6)
4.b Secondary CH2 refined with riding coordinates:
 C10(H10A,H10B), C11(H11A,H11B), C12(H12A,H12B), C13(H13A,H13B)
4.c Aromatic/amide H refined with riding coordinates:
 C3(H3), C7(H7), C14(H14), C15(H15), C16(H16), N1(H1), N2(H2)
4.d Tetrahedral OH refined with riding coordinates:
 O2(H2A)
4.e Idealised Me refined as rotating group:
 C1(H1A,H1B,H1C), C18(H18A,H18B,H18C), C19(H19A,H19B,H19C)
;
_atom_sites_solution_hydrogens     geom
_atom_sites_solution_primary       ?
_atom_sites_solution_secondary     ?
loop_
  _atom_site_label
  _atom_site_type_symbol
  _atom_site_fract_x
  _atom_site_fract_y
  _atom_site_fract_z
  _atom_site_U_iso_or_equiv
  _atom_site_adp_type
  _atom_site_occupancy
  _atom_site_site_symmetry_order
  _atom_site_calc_flag
  _atom_site_refinement_flags_posn
  _atom_site_refinement_flags_adp
  _atom_site_refinement_flags_occupancy
  _atom_site_disorder_assembly
  _atom_site_disorder_group
 C1 C 0.3839(7) 0.5167(9) 0.4123(9) 0.132(5) Uani 1 1 d . . . . .
 H1A H 0.4205 0.5483 0.3806 0.198 Uiso 1 1 calc GR . . . .
 H1B H 0.4082 0.4758 0.4461 0.198 Uiso 1 1 calc GR . . . .
 H1C H 0.3561 0.5447 0.4626 0.198 Uiso 1 1 calc GR . . . .
 C2 C 0.3313(8) 0.4871(6) 0.3290(10) 0.097(3) Uani 1 1 d . . . . .
 C3 C 0.2603(6) 0.4720(5) 0.3548(7) 0.081(3) Uani 1 1 d . . . . .
 H3 H 0.2458 0.4801 0.4233 0.098 Uiso 1 1 calc R . . . .
 C4 C 0.2070(5) 0.4448(5) 0.2856(6) 0.064(2) Uani 1 1 d . . . . .
 C5 C 0.1719(5) 0.4033(5) 0.1056(6) 0.064(2) Uani 1 1 d . . . . .
 H5 H 0.1227 0.3948 0.1361 0.076 Uiso 1 1 calc R . . . .
 C6 C 0.1652(5) 0.4605(5) 0.0179(6) 0.068(2) Uani 1 1 d . . . . .
 H6 H 0.2147 0.4727 -0.0090 0.082 Uiso 1 1 calc R . . . .
 C7 C 0.1674(6) 0.5898(6) 0.0660(7) 0.087(3) Uani 1 1 d . . . . .
 H7 H 0.2173 0.5901 0.0468 0.104 Uiso 1 1 calc R . . . .
 C8 C 0.1338(7) 0.6580(5) 0.1037(7) 0.084(3) Uani 1 1 d . . . . .
 C9 C 0.0634(6) 0.6591(5) 0.1432(7) 0.073(2) Uani 1 1 d . . . . .
 C10 C 0.1173(5) 0.4296(5) -0.0690(7) 0.079(3) Uani 1 1 d . . . . .
 H10A H 0.1166 0.4648 -0.1261 0.095 Uiso 1 1 calc R . . . .
 H10B H 0.0667 0.4241 -0.0439 0.095 Uiso 1 1 calc R . . . .
 C11 C 0.1451(6) 0.3545(5) -0.1090(6) 0.079(3) Uani 1 1 d . . . . .
 H11A H 0.1109 0.3354 -0.1609 0.095 Uiso 1 1 calc R . . . .
 H11B H 0.1934 0.3605 -0.1414 0.095 Uiso 1 1 calc R . . . .
 C12 C 0.1509(5) 0.2995(5) -0.0188(6) 0.075(3) Uani 1 1 d . . . . .
 H12A H 0.1019 0.2905 0.0102 0.091 Uiso 1 1 calc R . . . .
 H12B H 0.1705 0.2525 -0.0438 0.091 Uiso 1 1 calc R . . . .
 C13 C 0.2021(5) 0.3308(5) 0.0653(6) 0.076(3) Uani 1 1 d . . . . .
 H13A H 0.2062 0.2955 0.1220 0.091 Uiso 1 1 calc R . . . .
 H13B H 0.2514 0.3386 0.0367 0.091 Uiso 1 1 calc R . . . .
 C14 C 0.1789(7) 0.7204(7) 0.1105(8) 0.102(3) Uani 1 1 d . . . . .
 H14 H 0.2282 0.7186 0.0890 0.122 Uiso 1 1 calc R . . . .
 C15 C 0.1484(9) 0.7861(7) 0.1505(9) 0.117(4) Uani 1 1 d . . . . .
 H15 H 0.1771 0.8291 0.1543 0.140 Uiso 1 1 calc R . . . .
 C16 C 0.0742(9) 0.7869(7) 0.1848(8) 0.105(4) Uani 1 1 d . . . . .
 H16 H 0.0534 0.8310 0.2085 0.126 Uiso 1 1 calc R . . . .
 C17 C 0.0332(7) 0.7248(5) 0.1839(8) 0.081(3) Uani 1 1 d . . . . .
 C18 C -0.0727(9) 0.7853(7) 0.2697(13) 0.140(5) Uani 1 1 d . . . . .
 H18A H -0.1244 0.7758 0.2823 0.210 Uiso 1 1 calc GR . . . .
 H18B H -0.0677 0.8278 0.2250 0.210 Uiso 1 1 calc GR . . . .
 H18C H -0.0480 0.7950 0.3345 0.210 Uiso 1 1 calc GR . . . .
 C19 C 0.1285(6) 0.4322(7) 0.3228(7) 0.096(3) Uani 1 1 d . . . . .
 H19A H 0.0955 0.4653 0.2869 0.143 Uiso 1 1 calc GR . . . .
 H19B H 0.1258 0.4414 0.3962 0.143 Uiso 1 1 calc GR . . . .
 H19C H 0.1143 0.3817 0.3089 0.143 Uiso 1 1 calc GR . . . .
 N1 N 0.2227(4) 0.4334(4) 0.1867(5) 0.068(2) Uani 1 1 d . . . . .
 H1 H 0.2670 0.4446 0.1670 0.082 Uiso 1 1 calc R . . . .
 N2 N 0.1296(4) 0.5279(4) 0.0582(5) 0.073(2) Uani 1 1 d . . . . .
 H2 H 0.0836 0.5267 0.0767 0.088 Uiso 1 1 calc R . . . .
 O1 O 0.3589(4) 0.4807(5) 0.2366(7) 0.109(2) Uani 1 1 d . . . . .
 O2 O 0.0192(4) 0.6034(4) 0.1422(5) 0.088(2) Uani 1 1 d D . . . .
 H2A H 0.0302 0.5748 0.1894 0.132 Uiso 1 1 calc R . . . .
 O3 O -0.0385(5) 0.7198(4) 0.2194(6) 0.103(2) Uani 1 1 d . . . . .
 O4 O 0.0000 0.5000 0.1172(13) 0.160(6) Uani 1 2 d DS T P . .

loop_
  _atom_site_aniso_label
  _atom_site_aniso_U_11
  _atom_site_aniso_U_22
  _atom_site_aniso_U_33
  _atom_site_aniso_U_23
  _atom_site_aniso_U_13
  _atom_site_aniso_U_12
 C1 0.098(9) 0.193(15) 0.106(8) -0.032(9) -0.039(7) -0.027(9)
 C2 0.109(10) 0.098(8) 0.083(7) -0.017(6) -0.028(7) 0.000(7)
 C3 0.090(8) 0.080(7) 0.075(5) -0.011(5) -0.026(5) 0.022(6)
 C4 0.072(6) 0.065(5) 0.055(5) -0.004(4) -0.016(4) 0.008(4)
 C5 0.069(6) 0.070(5) 0.052(4) -0.006(4) -0.010(4) -0.004(5)
 C6 0.073(6) 0.074(6) 0.059(5) -0.009(4) -0.004(4) 0.004(5)
 C7 0.116(8) 0.088(8) 0.057(5) 0.005(5) -0.010(5) -0.015(7)
 C8 0.124(10) 0.058(6) 0.069(5) 0.000(4) -0.010(6) -0.015(6)
 C9 0.091(7) 0.048(5) 0.078(5) 0.008(4) -0.011(5) -0.021(5)
 C10 0.095(7) 0.091(7) 0.051(4) -0.007(4) -0.002(4) 0.013(5)
 C11 0.087(7) 0.096(7) 0.055(5) -0.021(5) -0.011(4) 0.015(6)
 C12 0.079(6) 0.079(6) 0.068(5) -0.021(4) -0.010(4) -0.003(5)
 C13 0.081(6) 0.086(6) 0.060(4) -0.014(4) -0.008(4) 0.024(5)
 C14 0.119(10) 0.083(8) 0.103(7) -0.001(6) 0.025(6) -0.035(7)
 C15 0.153(13) 0.089(9) 0.109(8) -0.006(7) 0.006(8) -0.044(9)
 C16 0.148(12) 0.078(8) 0.088(7) 0.000(6) -0.008(7) -0.024(8)
 C17 0.112(9) 0.054(6) 0.078(6) 0.006(4) -0.016(6) -0.002(6)
 C18 0.148(12) 0.094(9) 0.177(13) -0.020(9) 0.024(10) 0.043(9)
 C19 0.086(7) 0.136(10) 0.066(5) -0.005(6) 0.006(5) -0.018(6)
 N1 0.059(4) 0.099(6) 0.046(4) -0.006(3) -0.004(3) -0.004(4)
 N2 0.074(5) 0.082(6) 0.064(4) -0.003(4) 0.003(3) 0.004(4)
 O1 0.082(5) 0.124(6) 0.119(6) -0.015(5) -0.019(4) -0.020(4)
 O2 0.085(5) 0.089(5) 0.089(4) 0.005(4) -0.014(3) -0.007(4)
 O3 0.121(7) 0.064(4) 0.126(5) 0.000(4) 0.005(5) 0.023(4)
 O4 0.151(13) 0.156(13) 0.174(13) 0.000 0.000 0.019(11)

_geom_special_details
;
 All esds (except the esd in the dihedral angle between two l.s. planes)
 are estimated using the full covariance matrix.  The cell esds are taken
 into account individually in the estimation of esds in distances, angles
 and torsion angles; correlations between esds in cell parameters are only
 used when they are defined by crystal symmetry.  An approximate (isotropic)
 treatment of cell esds is used for estimating esds involving l.s. planes.
;
loop_
  _geom_bond_atom_site_label_1
  _geom_bond_atom_site_label_2
  _geom_bond_distance
  _geom_bond_site_symmetry_2
  _geom_bond_publ_flag
 C1 H1A 0.9600 . ?
 C1 H1B 0.9600 . ?
 C1 H1C 0.9600 . ?
 C1 C2 1.525(15) . ?
 C2 C3 1.348(15) . ?
 C2 O1 1.293(14) . ?
 C3 H3 0.9300 . ?
 C3 C4 1.396(12) . ?
 C4 C19 1.508(13) . ?
 C4 N1 1.319(10) . ?
 C5 H5 0.9800 . ?
 C5 C6 1.531(11) . ?
 C5 C13 1.505(12) . ?
 C5 N1 1.489(10) . ?
 C6 H6 0.9800 . ?
 C6 C10 1.517(12) . ?
 C6 N2 1.466(11) . ?
 C7 H7 0.9300 . ?
 C7 C8 1.450(15) . ?
 C7 N2 1.310(12) . ?
 C8 C9 1.364(15) . ?
 C8 C14 1.388(15) . ?
 C9 C17 1.402(14) . ?
 C9 O2 1.279(10) . ?
 C10 H10A 0.9700 . ?
 C10 H10B 0.9700 . ?
 C10 C11 1.530(13) . ?
 C11 H11A 0.9700 . ?
 C11 H11B 0.9700 . ?
 C11 C12 1.529(13) . ?
 C12 H12A 0.9700 . ?
 C12 H12B 0.9700 . ?
 C12 C13 1.529(11) . ?
 C13 H13A 0.9700 . ?
 C13 H13B 0.9700 . ?
 C14 H14 0.9300 . ?
 C14 C15 1.402(17) . ?
 C15 H15 0.9300 . ?
 C15 C16 1.405(18) . ?
 C16 H16 0.9300 . ?
 C16 C17 1.339(15) . ?
 C17 O3 1.372(13) . ?
 C18 H18A 0.9600 . ?
 C18 H18B 0.9600 . ?
 C18 H18C 0.9600 . ?
 C18 O3 1.478(13) . ?
 C19 H19A 0.9600 . ?
 C19 H19B 0.9600 . ?
 C19 H19C 0.9600 . ?
 N1 H1 0.8600 . ?
 N2 H2 0.8600 . ?
 O2 H2A 0.8200 . ?

loop_
  _geom_angle_atom_site_label_1
  _geom_angle_atom_site_label_2
  _geom_angle_atom_site_label_3
  _geom_angle
  _geom_angle_site_symmetry_1
  _geom_angle_site_symmetry_3
  _geom_angle_publ_flag
 H1A C1 H1B 109.5 . . ?
 H1A C1 H1C 109.5 . . ?
 H1B C1 H1C 109.5 . . ?
 C2 C1 H1A 109.5 . . ?
 C2 C1 H1B 109.5 . . ?
 C2 C1 H1C 109.5 . . ?
 C3 C2 C1 119.0(11) . . ?
 O1 C2 C1 116.1(12) . . ?
 O1 C2 C3 124.9(9) . . ?
 C2 C3 H3 117.8 . . ?
 C2 C3 C4 124.4(10) . . ?
 C4 C3 H3 117.8 . . ?
 C3 C4 C19 119.6(8) . . ?
 N1 C4 C3 121.5(9) . . ?
 N1 C4 C19 118.8(7) . . ?
 C6 C5 H5 109.2 . . ?
 C13 C5 H5 109.2 . . ?
 C13 C5 C6 111.0(6) . . ?
 N1 C5 H5 109.2 . . ?
 N1 C5 C6 108.6(6) . . ?
 N1 C5 C13 109.6(7) . . ?
 C5 C6 H6 109.8 . . ?
 C10 C6 C5 109.9(7) . . ?
 C10 C6 H6 109.8 . . ?
 N2 C6 C5 109.3(6) . . ?
 N2 C6 H6 109.8 . . ?
 N2 C6 C10 108.3(7) . . ?
 C8 C7 H7 119.1 . . ?
 N2 C7 H7 119.1 . . ?
 N2 C7 C8 121.9(10) . . ?
 C9 C8 C7 121.6(9) . . ?
 C9 C8 C14 120.5(10) . . ?
 C14 C8 C7 117.4(11) . . ?
 C8 C9 C17 120.7(9) . . ?
 O2 C9 C8 124.2(9) . . ?
 O2 C9 C17 115.0(10) . . ?
 C6 C10 H10A 109.1 . . ?
 C6 C10 H10B 109.1 . . ?
 C6 C10 C11 112.7(8) . . ?
 H10A C10 H10B 107.8 . . ?
 C11 C10 H10A 109.1 . . ?
 C11 C10 H10B 109.1 . . ?
 C10 C11 H11A 109.7 . . ?
 C10 C11 H11B 109.7 . . ?
 H11A C11 H11B 108.2 . . ?
 C12 C11 C10 109.8(7) . . ?
 C12 C11 H11A 109.7 . . ?
 C12 C11 H11B 109.7 . . ?
 C11 C12 H12A 109.7 . . ?
 C11 C12 H12B 109.7 . . ?
 H12A C12 H12B 108.2 . . ?
 C13 C12 C11 109.9(8) . . ?
 C13 C12 H12A 109.7 . . ?
 C13 C12 H12B 109.7 . . ?
 C5 C13 C12 110.2(7) . . ?
 C5 C13 H13A 109.6 . . ?
 C5 C13 H13B 109.6 . . ?
 C12 C13 H13A 109.6 . . ?
 C12 C13 H13B 109.6 . . ?
 H13A C13 H13B 108.1 . . ?
 C8 C14 H14 120.8 . . ?
 C8 C14 C15 118.5(12) . . ?
 C15 C14 H14 120.8 . . ?
 C14 C15 H15 120.2 . . ?
 C14 C15 C16 119.7(11) . . ?
 C16 C15 H15 120.2 . . ?
 C15 C16 H16 119.6 . . ?
 C17 C16 C15 120.8(12) . . ?
 C17 C16 H16 119.6 . . ?
 C16 C17 C9 119.5(12) . . ?
 C16 C17 O3 124.7(11) . . ?
 O3 C17 C9 115.7(9) . . ?
 H18A C18 H18B 109.5 . . ?
 H18A C18 H18C 109.5 . . ?
 H18B C18 H18C 109.5 . . ?
 O3 C18 H18A 109.5 . . ?
 O3 C18 H18B 109.5 . . ?
 O3 C18 H18C 109.5 . . ?
 C4 C19 H19A 109.5 . . ?
 C4 C19 H19B 109.5 . . ?
 C4 C19 H19C 109.5 . . ?
 H19A C19 H19B 109.5 . . ?
 H19A C19 H19C 109.5 . . ?
 H19B C19 H19C 109.5 . . ?
 C4 N1 C5 127.0(7) . . ?
 C4 N1 H1 116.5 . . ?
 C5 N1 H1 116.5 . . ?
 C6 N2 H2 119.9 . . ?
 C7 N2 C6 120.2(8) . . ?
 C7 N2 H2 119.9 . . ?
 C9 O2 H2A 109.5 . . ?
 C17 O3 C18 119.0(9) . . ?

loop_
  _geom_torsion_atom_site_label_1
  _geom_torsion_atom_site_label_2
  _geom_torsion_atom_site_label_3
  _geom_torsion_atom_site_label_4
  _geom_torsion
  _geom_torsion_site_symmetry_1
  _geom_torsion_site_symmetry_2
  _geom_torsion_site_symmetry_3
  _geom_torsion_site_symmetry_4
  _geom_torsion_publ_flag
 C1 C2 C3 C4 179.9(10) . . . . ?
 C2 C3 C4 C19 -178.1(10) . . . . ?
 C2 C3 C4 N1 -1.5(15) . . . . ?
 C3 C4 N1 C5 178.5(8) . . . . ?
 C5 C6 C10 C11 -54.5(10) . . . . ?
 C5 C6 N2 C7 112.2(8) . . . . ?
 C6 C5 C13 C12 -59.6(10) . . . . ?
 C6 C5 N1 C4 121.6(9) . . . . ?
 C6 C10 C11 C12 55.5(11) . . . . ?
 C7 C8 C9 C17 176.9(8) . . . . ?
 C7 C8 C9 O2 -6.4(14) . . . . ?
 C7 C8 C14 C15 -177.6(10) . . . . ?
 C8 C7 N2 C6 178.9(7) . . . . ?
 C8 C9 C17 C16 -0.7(14) . . . . ?
 C8 C9 C17 O3 178.7(8) . . . . ?
 C8 C14 C15 C16 1.5(18) . . . . ?
 C9 C8 C14 C15 -5.4(16) . . . . ?
 C9 C17 O3 C18 176.0(10) . . . . ?
 C10 C6 N2 C7 -128.0(8) . . . . ?
 C10 C11 C12 C13 -57.0(11) . . . . ?
 C11 C12 C13 C5 60.0(10) . . . . ?
 C13 C5 C6 C10 56.3(10) . . . . ?
 C13 C5 C6 N2 175.0(7) . . . . ?
 C13 C5 N1 C4 -117.1(9) . . . . ?
 C14 C8 C9 C17 5.1(14) . . . . ?
 C14 C8 C9 O2 -178.3(9) . . . . ?
 C14 C15 C16 C17 2.8(18) . . . . ?
 C15 C16 C17 C9 -3.3(16) . . . . ?
 C15 C16 C17 O3 177.5(10) . . . . ?
 C16 C17 O3 C18 -4.6(15) . . . . ?
 C19 C4 N1 C5 -4.9(13) . . . . ?
 N1 C5 C6 C10 176.8(7) . . . . ?
 N1 C5 C6 N2 -64.5(9) . . . . ?
 N1 C5 C13 C12 -179.5(7) . . . . ?
 N2 C6 C10 C11 -173.8(8) . . . . ?
 N2 C7 C8 C9 7.0(13) . . . . ?
 N2 C7 C8 C14 179.1(9) . . . . ?
 O1 C2 C3 C4 2.1(19) . . . . ?
 O2 C9 C17 C16 -177.6(9) . . . . ?
 O2 C9 C17 O3 1.8(12) . . . . ?

_shelx_res_file
;
    1_sq_s.res created by SHELXL-2014/7

TITL a_sq_s P 21 21 2 R = New: P42212
CELL 0.71073 17.989 17.989 12.862 90 90 90
ZERR 8 0.002 0.002 0.002 0 0 0
LATT -1
SYMM 0.5-Y,0.5+X,0.5+Z
SYMM -X,-Y,+Z
SYMM 0.5+Y,0.5-X,0.5+Z
SYMM 0.5+X,0.5-Y,0.5-Z
SYMM +Y,+X,-Z
SYMM 0.5-X,0.5+Y,0.5-Z
SYMM -Y,-X,-Z
SFAC C H N O
UNIT 152 216 16 28
DFIX 3.52 O2 O4

L.S. 10
PLAN  -20
SIZE 0.12 0.15 0.23
BOND $H
CONF
ABIN
fmap 2
acta
TWIN -1 0 0 0 -1 0 0 0 -1 2
OMIT 0 50
REM <olex2.extras>
REM <HklSrc "%.\\1_sq_s.hkl">
REM </olex2.extras>

WGHT    0.200000
BASF  -1.85517
FVAR       0.61945
C1    1    0.383885    0.516739    0.412259    11.00000    0.09827    0.19309 =
         0.10562   -0.03152   -0.03920   -0.02695
AFIX 137
H1A   2    0.420470    0.548303    0.380576    11.00000   -1.50000
H1B   2    0.408194    0.475848    0.446087    11.00000   -1.50000
H1C   2    0.356082    0.544697    0.462555    11.00000   -1.50000
AFIX   0
C2    1    0.331334    0.487147    0.328976    11.00000    0.10876    0.09774 =
         0.08348   -0.01655   -0.02768   -0.00047
C3    1    0.260289    0.471951    0.354799    11.00000    0.08966    0.07965 =
         0.07504   -0.01072   -0.02639    0.02249
AFIX  43
H3    2    0.245828    0.480085    0.423280    11.00000   -1.20000
AFIX   0
C4    1    0.206993    0.444827    0.285622    11.00000    0.07182    0.06479 =
         0.05463   -0.00357   -0.01620    0.00758
C5    1    0.171920    0.403285    0.105574    11.00000    0.06922    0.07047 =
         0.05151   -0.00567   -0.01008   -0.00431
AFIX  13
H5    2    0.122741    0.394798    0.136128    11.00000   -1.20000
AFIX   0
C6    1    0.165241    0.460520    0.017923    11.00000    0.07260    0.07365 =
         0.05922   -0.00938   -0.00361    0.00376
AFIX  13
H6    2    0.214747    0.472665   -0.008962    11.00000   -1.20000
AFIX   0
C7    1    0.167406    0.589821    0.066016    11.00000    0.11550    0.08840 =
         0.05700    0.00459   -0.01001   -0.01452
AFIX  43
H7    2    0.217250    0.590127    0.046832    11.00000   -1.20000
AFIX   0
C8    1    0.133788    0.657959    0.103749    11.00000    0.12416    0.05797 =
         0.06923   -0.00046   -0.00970   -0.01549
C9    1    0.063394    0.659068    0.143223    11.00000    0.09135    0.04836 =
         0.07801    0.00751   -0.01112   -0.02111
C10   1    0.117301    0.429622   -0.068965    11.00000    0.09460    0.09112 =
         0.05073   -0.00712   -0.00218    0.01256
AFIX  23
H10A  2    0.116572    0.464825   -0.126083    11.00000   -1.20000
H10B  2    0.066739    0.424061   -0.043943    11.00000   -1.20000
AFIX   0
C11   1    0.145057    0.354466   -0.108985    11.00000    0.08724    0.09560 =
         0.05487   -0.02078   -0.01100    0.01512
AFIX  23
H11A  2    0.110896    0.335399   -0.160886    11.00000   -1.20000
H11B  2    0.193378    0.360543   -0.141355    11.00000   -1.20000
AFIX   0
C12   1    0.150901    0.299472   -0.018764    11.00000    0.07942    0.07857 =
         0.06844   -0.02150   -0.00981   -0.00287
AFIX  23
H12A  2    0.101934    0.290509    0.010223    11.00000   -1.20000
H12B  2    0.170458    0.252509   -0.043768    11.00000   -1.20000
AFIX   0
C13   1    0.202137    0.330796    0.065313    11.00000    0.08106    0.08596 =
         0.06026   -0.01446   -0.00806    0.02384
AFIX  23
H13A  2    0.206175    0.295484    0.122028    11.00000   -1.20000
H13B  2    0.251416    0.338571    0.036696    11.00000   -1.20000
AFIX   0
C14   1    0.178895    0.720379    0.110529    11.00000    0.11878    0.08272 =
         0.10308   -0.00074    0.02533   -0.03454
AFIX  43
H14   2    0.228223    0.718616    0.089027    11.00000   -1.20000
AFIX   0
C15   1    0.148381    0.786143    0.150537    11.00000    0.15266    0.08918 =
         0.10922   -0.00641    0.00624   -0.04393
AFIX  43
H15   2    0.177072    0.829063    0.154344    11.00000   -1.20000
AFIX   0
C16   1    0.074242    0.786872    0.184844    11.00000    0.14781    0.07784 =
         0.08816    0.00022   -0.00839   -0.02422
AFIX  43
H16   2    0.053400    0.831048    0.208531    11.00000   -1.20000
AFIX   0
C17   1    0.033196    0.724768    0.183876    11.00000    0.11165    0.05400 =
         0.07802    0.00635   -0.01619   -0.00165
C18   1   -0.072656    0.785331    0.269729    11.00000    0.14843    0.09417 =
         0.17674   -0.02001    0.02376    0.04300
AFIX 137
H18A  2   -0.124379    0.775765    0.282325    11.00000   -1.50000
H18B  2   -0.067719    0.827758    0.224983    11.00000   -1.50000
H18C  2   -0.048028    0.795034    0.334539    11.00000   -1.50000
AFIX   0
C19   1    0.128476    0.432157    0.322784    11.00000    0.08555    0.13578 =
         0.06560   -0.00509    0.00561   -0.01802
AFIX 137
H19A  2    0.095453    0.465335    0.286945    11.00000   -1.50000
H19B  2    0.125755    0.441378    0.396201    11.00000   -1.50000
H19C  2    0.114251    0.381695    0.308856    11.00000   -1.50000
AFIX   0
N1    3    0.222668    0.433421    0.186728    11.00000    0.05855    0.09896 =
         0.04646   -0.00564   -0.00385   -0.00407
AFIX  43
H1    2    0.266960    0.444590    0.167000    11.00000   -1.20000
AFIX   0
N2    3    0.129565    0.527871    0.058191    11.00000    0.07361    0.08196 =
         0.06396   -0.00263    0.00322    0.00414
AFIX  43
H2    2    0.083648    0.526711    0.076736    11.00000   -1.20000
AFIX   0
O1    4    0.358896    0.480694    0.236609    11.00000    0.08249    0.12404 =
         0.11925   -0.01493   -0.01852   -0.02030
O2    4    0.019191    0.603420    0.142185    11.00000    0.08549    0.08855 =
         0.08918    0.00512   -0.01421   -0.00703
AFIX  83
H2A   2    0.030192    0.574825    0.189390    11.00000   -1.50000
AFIX   0
O3    4   -0.038542    0.719806    0.219449    11.00000    0.12079    0.06382 =
         0.12551    0.00043    0.00472    0.02278
O4    4    0.000000    0.500000    0.117210    10.50000    0.15123    0.15615 =
         0.17385    0.00000    0.00000    0.01889
HKLF 4

REM  a_sq_s P 21 21 2 R = New: P42212
REM R1 =  0.1018 for    1749 Fo > 4sig(Fo)  and  0.2233 for all    3594 data
REM    226 parameters refined using      1 restraints

END

WGHT      0.2000      0.0000

REM Highest difference peak  0.383,  deepest hole -0.818,  1-sigma level  0.086
Q1    1   0.0220  0.5808  0.1342  11.00000  0.05    0.38
Q2    1   0.1587  0.3101  0.2702  11.00000  0.05    0.26
Q3    1   0.2016  0.2766  0.1546  11.00000  0.05    0.25
Q4    1   0.1429  0.1216 -0.1315  11.00000  0.05    0.23
Q5    1   0.2473  0.7137  0.0172  11.00000  0.05    0.23
Q6    1   0.2164  0.5302  0.2278  11.00000  0.05    0.22
Q7    1  -0.0861  0.6800  0.3994  11.00000  0.05    0.22
Q8    1   0.1842  0.1765 -0.0928  11.00000  0.05    0.21
Q9    1  -0.0548  0.6956  0.3535  11.00000  0.05    0.21
Q10   1  -0.1579  0.8024  0.2058  11.00000  0.05    0.21
Q11   1   0.1863  0.2298  0.0225  11.00000  0.05    0.21
Q12   1   0.1615  0.1607 -0.0812  11.00000  0.05    0.21
Q13   1   0.0981  0.4812  0.1547  11.00000  0.05    0.20
Q14   1  -0.0423  0.6798  0.3341  11.00000  0.05    0.20
Q15   1   0.0615  0.3587 -0.2550  11.00000  0.05    0.20
Q16   1   0.1496  0.2214 -0.0650  11.00000  0.05    0.20
Q17   1   0.1812  0.5927  0.2099  11.00000  0.05    0.20
Q18   1   0.2346  0.2213  0.1663  11.00000  0.05    0.20
Q19   1   0.0683  0.3024 -0.1349  11.00000  0.05    0.20
Q20   1   0.2671  0.5876  0.3324  11.00000  0.05    0.19
;
_shelx_res_checksum                85653
_shelx_hkl_file
;
  -2   1   0   17.10    5.60
   0  -2   0   -2.00    6.30
  -2   2   0 9999.00  287.57
   2   2   0 9356.06  287.17
   2  -2   0 9801.22  287.47
  -2  -2   0 9755.02  287.77
   2   3   0 3537.35  121.19
   2   3   0 3538.35  120.49
  -2  -3   0 3970.80  122.79
   3  -2   0 3714.03  121.89
  -2  -3   0 3797.22  122.39
  -3   2   0 3780.22  121.29
  -3   2   0 3821.72  121.19
   3  -2   0 3695.53  121.39
  -3   1   0 7321.47  218.48
   3  -1   0 6998.50  218.48
   3  -1   0 7424.36  233.08
   1   3   0 6905.81  218.08
  -1  -3   0 7484.55  228.18
  -1  -3   0 7373.26  219.68
   3   0   0   15.20    8.70
  -3   0   0    5.00    9.10
   0  -3   0    1.40    8.60
   0   3   0   12.10    9.40
   1  -3   0 7124.59  219.08
  -3  -1   0 6804.72  210.18
   3   1   0 6927.71  229.38
   3   1   0 6772.42  210.08
   1  -3   0 7099.69  210.68
  -2   3   0 3216.98  103.99
   3   2   0 3003.90  103.49
   2  -3   0 3070.79  103.09
  -3  -2   0 3203.98  104.29
  -3  -2   0 3001.90  103.29
  -2   3   0 3152.78  103.49
   3   2   0 2949.41  102.79
   2  -3   0 3156.08  103.49
   3  -3   0 3794.42  128.29
  -3   3   0 4163.98  129.59
  -3  -3   0 3970.30  129.19
   3   3   0 3912.41  128.99
   3  -3   0 3797.62  128.69
  -3  -3   0 3873.61  129.39
  -3   3   0 3846.72  128.19
   3   3   0 3744.23  128.69
   3   4   0  573.64   38.40
  -3  -4   0  587.84   38.50
  -3  -4   0  505.05   36.50
  -4   3   0  597.74   37.70
   4  -3   0  507.65   37.50
  -4   3   0  593.74   36.70
   3   4   0  604.34   37.70
   4  -3   0  572.24   37.40
  -4   2   0  680.13   39.00
   4  -2   0  640.74   38.90
  -2  -4   0  703.13   39.80
  -2  -4   0  736.93   40.30
   4  -2   0  658.53   39.40
  -4   2   0  743.33   39.80
   2   4   0  655.73   39.70
   2   4   0  628.14   38.20
   4  -1   0 2524.25   91.79
  -1  -4   0 2664.23   93.09
   4  -1   0 2577.84   92.49
   1   4   0 2508.25   91.69
  -4   1   0 2606.94   92.39
  -4   1   0 2763.72   93.29
   1   4   0 2532.85   92.49
  -1  -4   0 2819.52   93.89
   4   0   0  101.49   17.00
   4   0   0  107.09   17.70
  -4   0   0  161.08   18.90
   0  -4   0  124.09   18.10
   0  -4   0  127.89   18.00
   0   4   0  122.19   17.90
   0   4   0  126.99   17.80
  -4   0   0  142.29   18.90
   4   1   0 2011.60   77.59
  -4  -1   0 2078.29   77.59
  -1   4   0 2077.09   76.79
  -4  -1   0 2065.49   77.09
   4   1   0 2062.99   76.79
   1  -4   0 2141.29   77.19
  -1   4   0 2131.79   77.49
   4   2   0  704.83   40.10
  -2   4   0  732.93   39.50
  -2   4   0  696.43   39.60
  -4  -2   0  709.43   40.10
  -4  -2   0  705.23   40.50
   4   2   0  670.03   40.60
   2  -4   0  773.52   40.60
   2  -4   0  726.53   40.50
  -4  -3   0  448.66   33.90
   4   3   0  386.06   32.50
  -3   4   0  455.15   32.80
   3  -4   0  411.06   32.60
   4   3   0  364.36   33.30
  -3   4   0  406.86   32.70
  -4  -3   0  416.96   33.80
   3  -4   0  432.36   33.70
  -4  -4   0  606.34   48.90
   4  -4   0  640.04   42.20
   4   4   0  639.54   41.80
  -4   4   0  649.14   43.10
   4   4   0  655.83   59.19
  -4   4   0  596.54   39.40
   4  -4   0  644.54   41.40
  -4  -4   0  661.13   41.50
  -4  -5   0   38.10   17.60
   4   5   0   58.89   18.70
  -5   4   0   52.79   16.90
   4   5   0   55.59   18.10
   5  -4   0   41.10   22.10
  -5   4   0   49.10   17.40
   5  -4   0   36.30   17.40
   5  -3   0   91.59   25.30
   3   5   0   95.39   20.40
  -5   3   0  107.79   19.40
  -3  -5   0   95.99   20.40
   5  -3   0   82.89   19.90
  -5   3   0  100.89   19.40
  -3  -5   0  102.39   30.40
   3   5   0  114.79   20.40
  -5   2   0 1223.28   56.49
   2   5   0 1183.68   57.29
   2   5   0 1115.39   74.29
  -2  -5   0 1222.68   56.99
   5  -2   0 1216.98   57.59
   5  -2   0 1206.28   56.89
  -2  -5   0 1195.18   57.29
  -5   2   0 1315.77   67.39
   5  -1   0   48.90   16.00
   1   5   0   25.40   14.70
  -5   1   0   47.10   14.80
  -5   1   0   52.49   15.90
  -1  -5   0   26.50   15.20
   5  -1   0   33.80   16.00
  -1  -5   0   41.90   16.10
   1   5   0   47.20   15.20
   0  -5   0   -5.70   14.60
   0   5   0    1.60   13.50
   0   5   0  -13.20   13.30
   0  -5   0   -6.20   12.60
  -5   0   0    1.60   14.00
  -5   0   0    8.70   13.70
   5   0   0  -11.60   14.50
   5   0   0   -2.30   13.30
   5   1   0   23.50   15.20
  -5  -1   0   15.60   15.20
   1  -5   0   45.60   16.30
  -1   5   0   26.70   14.80
  -5  -1   0   34.20   15.40
   5   1   0   35.90   15.80
  -1   5   0   34.70   14.90
   5   2   0 1054.39   52.99
  -5  -2   0  980.40   52.19
   2  -5   0 1098.09   52.99
   5   2   0 1058.29   53.49
  -2   5   0 1089.59   52.69
   2  -5   0 1155.78   53.59
  -5  -2   0 1112.09   53.59
  -3   5   0  160.18   22.20
   3  -5   0  167.88   27.70
   5   3   0  171.18   24.40
  -3   5   0  178.68   23.40
   5   3   0  174.98   23.90
   3  -5   0  178.38   24.00
  -5  -3   0  160.68   23.10
  -5  -3   0  206.48   36.30
  -4   5   0   29.60   15.50
   5   4   0   10.80   16.30
  -5  -4   0   -9.80   15.60
   4  -5   0   18.40   16.60
   4  -5   0    3.60   20.90
  -4   5   0   20.10   14.90
   5   4   0   12.20   15.70
  -5  -4   0   28.50   23.10
   5  -5   0  144.59   24.40
  -5   5   0  155.28   24.10
   5   5   0  113.89   22.10
  -5  -5   0  134.49   23.80
  -5  -5   0  123.29   23.40
   5   5   0   78.09   22.60
   5  -5   0  128.79   22.90
  -5  -6   0   29.20   20.10
   6  -5   0    3.70   17.30
   5   6   0   17.50   17.80
   5   6   0   19.10   17.50
  -5  -6   0   13.60   18.10
  -6   5   0   44.80   18.90
  -6   5   0   -6.30   14.50
   6  -5   0   -5.80   16.30
  -6   4   0  537.45   50.99
   4   6   0  497.35   40.00
   4   6   0  435.46   41.80
  -4  -6   0  480.45   41.10
   6  -4   0  504.95   41.40
   6  -4   0  477.05   40.70
  -4  -6   0  522.25   41.00
  -6   4   0  432.36   38.50
   6  -3   0    8.80   17.20
  -6   3   0   27.70   17.10
  -6   3   0   23.40   16.70
  -3  -6   0   56.19   19.00
   3   6   0   19.90   16.30
   3   6   0   43.10   19.00
   6  -3   0   19.20   17.20
  -3  -6   0   61.19   19.50
   2   6   0   31.00   16.40
   2   6   0   22.80   16.20
   6  -2   0   21.50   22.60
  -6   2   0   18.50   15.10
  -6   2   0    6.00   15.00
   6  -2   0   31.50   16.20
  -2  -6   0   18.10   15.50
   1   6   0 1978.80   80.89
   1   6   0 1935.71   80.29
  -6   1   0 1849.61   78.69
  -1  -6   0 2032.40   92.99
   6  -1   0 1930.21   83.79
  -1  -6   0 1943.21   89.79
  -6   1   0 1962.40   79.99
   6  -1   0 1990.90   82.99
   6   0   0 2130.49   93.39
   6   0   0 2122.49   86.79
   0  -6   0 2142.19   89.99
   0   6   0 2148.09   85.79
  -6   0   0 2218.08   87.19
   0   6   0 2192.38   86.89
  -6   0   0 2223.98   86.99
  -6  -1   0 1751.52   74.49
  -1   6   0 1679.33   72.79
  -6  -1   0 1655.03   73.29
   6   1   0 1770.02   75.29
  -1   6   0 1723.33   72.99
   6   1   0 1593.44   73.29
   1  -6   0 1858.51   92.19
  -6  -2   0   40.30   17.60
   6   2   0   65.89   18.50
   2  -6   0   74.79   24.60
  -2   6   0   19.00   15.10
   6   2   0   46.40   19.90
  -2   6   0   43.60   17.50
  -6  -2   0   46.60   18.10
   2  -6   0   26.20   16.90
   3  -6   0  -13.30   14.00
   6   3   0    3.70   15.20
  -6  -3   0   33.00   22.40
  -6  -3   0   -3.20   14.70
  -3   6   0   17.30   14.20
   3  -6   0    2.10   16.50
   6   4   0  440.46   40.10
   4  -6   0  503.05   40.90
   4  -6   0  476.95   39.90
  -4   6   0  554.44   50.19
  -4   6   0  498.95   39.90
   6   4   0  580.54   43.30
  -6  -4   0  466.85   40.40
  -6  -4   0  495.85   40.70
  -6  -5   0   51.99   20.50
  -5   6   0   53.49   19.50
   6   5   0   27.80   18.10
   6   5   0   19.80   17.70
   5  -6   0   13.30   18.20
  -5   6   0   69.99   19.90
   5  -6   0   38.20   19.20
  -6  -5   0   59.19   20.50
  -6  -6   0  164.58   28.10
   6   6   0  156.68   27.70
  -6  -6   0  132.29   26.00
   6   6   0  141.09   26.70
   6  -6   0  114.59   26.00
  -6   6   0  155.38   26.80
   6  -6   0  128.49   25.80
  -6   6   0  160.88   26.30
  -6  -7   0  245.48   32.10
  -7   6   0  240.58   31.10
   6   7   0  192.08   31.50
   7  -6   0  195.48   30.50
  -7   6   0  261.97   33.30
  -6  -7   0  242.68   32.90
   6   7   0  226.58   32.60
   7  -6   0  164.48   30.30
  -7   5   0 1093.39   64.49
  -7   5   0 1150.28   64.29
   5   7   0 1190.98   66.89
  -5  -7   0 1213.28   67.89
   7  -5   0 1135.09   65.79
  -5  -7   0 1180.98   67.29
   5   7   0 1289.07   68.59
   7  -5   0 1201.58   67.69
   7  -4   0  104.39   24.50
   7  -4   0   97.69   23.50
  -7   4   0  104.99   21.20
   4   7   0   66.39   21.00
  -4  -7   0   96.19   23.00
  -4  -7   0   76.39   22.00
   4   7   0   91.69   22.80
  -7   4   0  135.59   24.50
  -3  -7   0   28.20   18.80
   7  -3   0   -3.20   17.40
  -7   3   0   34.90   18.80
   3   7   0   17.00   17.50
  -3  -7   0   -1.00   17.20
   7  -3   0   34.80   18.30
   3   7   0   17.50   17.40
  -7   3   0   20.40   17.60
  -7   2   0  122.89   21.50
   2   7   0  151.08   26.00
   7  -2   0  141.79   24.30
   7  -2   0  114.89   22.90
  -2  -7   0  147.79   25.10
  -2  -7   0  120.79   22.70
   2   7   0  119.99   23.20
  -7   2   0  120.79   23.30
  -7   1   0  813.72   52.49
   1   7   0  691.63   45.60
  -1  -7   0  715.93   46.50
  -7   1   0  679.63   45.50
  -1  -7   0  676.73   46.60
   7  -1   0  686.53   47.30
   7  -1   0  716.13   47.20
   0  -7   0   14.30   16.70
   0   7   0   37.20   23.10
  -7   0   0   31.30   17.10
  -7   0   0   32.10   18.30
   0  -7   0    2.80   15.10
   7   0   0   33.00   18.40
   0   7   0   16.20   16.00
   7   0   0    0.40   16.00
   7   1   0  744.53   47.50
  -1   7   0  748.03   46.80
  -7  -1   0  652.63   46.20
  -7  -1   0  781.42   48.80
   1  -7   0  660.73   46.70
   7   1   0  779.82   49.40
  -7  -2   0   26.10   19.20
   7   2   0   58.69   20.40
   7   2   0   57.19   20.20
  -7  -2   0   75.59   20.80
   2  -7   0   67.09   20.20
   2  -7   0   46.60   19.90
  -2   7   0   69.49   20.20
  -2   7   0   67.19   23.90
  -3   7   0   16.50   16.20
  -7  -3   0   28.90   17.20
   3  -7   0   17.00   18.60
  -7  -3   0   11.90   17.40
   7   3   0   18.20   17.60
   7   3   0    0.10   17.20
   3  -7   0   32.90   16.80
   7   4   0   24.40   18.80
  -4   7   0   26.20   18.80
   4  -7   0   41.00   18.90
   4  -7   0   40.90   18.60
  -4   7   0    1.10   14.50
   7   4   0   20.10   19.30
  -7  -4   0   34.20   19.50
  -7  -4   0   42.40   19.20
  -5   7   0 1212.08   63.69
  -7  -5   0 1096.29   63.99
   7   5   0 1139.09   64.69
  -5   7   0 1052.29   62.59
   7   5   0 1036.50   62.69
   5  -7   0 1014.80   62.99
  -7  -5   0 1044.50   62.09
   5  -7   0 1102.69   64.09
   6  -7   0  239.88   32.00
   7   6   0  182.48   30.60
  -7  -6   0  215.98   31.60
  -6   7   0  199.28   30.30
   6  -7   0  198.08   30.40
  -6   7   0  191.08   28.20
  -7  -6   0  231.38   32.80
   7   6   0  167.68   30.50
  -7  -7   0   61.49   23.90
  -7   7   0   95.59   24.30
  -7   7   0  118.29   24.20
   7  -7   0   94.59   25.60
   7   7   0   67.59   24.30
  -7  -7   0   87.29   25.90
   7  -7   0   68.99   25.30
   7   7   0   83.49   24.60
   8  -7   0  133.19   29.10
  -7  -8   0  135.99   27.70
   7   8   0  105.89   26.40
  -8   7   0  158.38   28.20
   7   8   0  147.49   29.30
  -7  -8   0  172.68   30.70
   8  -7   0  118.89   26.20
  -8   7   0  115.19   26.00
  -8   6   0  218.08   32.20
   6   8   0  254.97   34.40
   8  -6   0  192.78   30.30
   8  -6   0  199.28   32.40
  -8   6   0  204.38   30.90
  -6  -8   0  205.48   32.60
  -6  -8   0  196.08   31.80
   6   8   0  229.38   33.00
  -8   5   0  254.37   32.90
  -5  -8   0  187.58   29.50
   5   8   0  199.98   30.70
   8  -5   0  176.28   29.40
  -5  -8   0  220.98   31.20
  -8   5   0  180.38   28.50
   8  -5   0  192.58   30.10
   5   8   0  189.08   30.60
  -4  -8   0    6.10   20.70
  -4  -8   0   24.70   20.70
   4   8   0    7.40   18.40
  -8   4   0   52.19   19.80
   8  -4   0   24.00   21.10
   4   8   0   25.60   19.90
  -8   4   0   29.10   18.50
   8  -4   0   27.30   21.60
   8  -3   0   96.99   24.40
  -8   3   0  119.39   25.50
  -8   3   0   87.89   22.30
   3   8   0   70.79   22.80
  -3  -8   0  102.19   24.60
  -3  -8   0  113.19   26.10
   3   8   0   88.89   24.50
   8  -3   0  120.79   26.50
   8  -2   0 3053.49  122.09
  -8   2   0 3137.59  120.49
  -8   2   0 3122.19  120.89
   2   8   0 3034.80  120.39
   8  -2   0 3025.10  120.59
  -2  -8   0 3134.19  122.19
  -2  -8   0 3133.69  122.29
   2   8   0 2995.30  120.19
   8  -1   0  392.66   40.60
   1   8   0  428.56   39.30
  -1  -8   0  465.05   41.50
  -1  -8   0  389.86   39.70
   1   8   0  414.66   41.20
  -8   1   0  493.15   42.00
   8  -1   0  400.86   40.30
  -8   1   0  393.76   38.20
   8   0   0   61.69   21.60
  -8   0   0   69.49   19.40
   0   8   0   47.90   17.70
   0  -8   0   62.49   21.10
   8   0   0   26.50   18.80
  -8   0   0   51.09   19.90
   0  -8   0   74.79   20.00
   0   8   0   43.00   20.30
   8   1   0  327.27   37.40
   8   1   0  340.77   38.80
   1  -8   0  347.27   37.70
  -8  -1   0  340.37   37.30
  -1   8   0  358.36   38.50
  -8  -1   0  341.57   38.10
  -1   8   0  292.87   34.90
   8   2   0 3104.19  125.59
  -8  -2   0 3189.68  125.29
   8   2   0 3252.07  125.99
   2  -8   0 3334.77  126.49
  -2   8   0 3419.76  125.79
  -8  -2   0 3124.39  125.29
  -2   8   0 3311.07  125.69
   2  -8   0 3231.68  125.89
   8   3   0  161.88   28.30
   8   3   0  118.39   25.20
  -3   8   0  142.79   27.50
  -3   8   0  179.68   27.00
  -8  -3   0  143.39   26.10
   3  -8   0  207.68   30.50
  -8  -3   0  204.38   29.80
   3  -8   0  146.29   26.50
  -4   8   0   42.50   19.90
  -8  -4   0   33.20   19.30
  -8  -4   0   56.09   22.80
   4  -8   0   25.50   20.10
   8   4   0   49.70   22.10
   4  -8   0   46.10   20.30
   8   4   0   19.40   19.40
   5  -8   0  122.39   25.90
   8   5   0  152.78   28.70
  -8  -5   0  166.98   27.80
   8   5   0  116.59   27.00
   5  -8   0  144.39   26.60
  -8  -5   0  182.48   30.00
  -5   8   0  192.78   29.30
  -5   8   0  195.08   29.30
   8   6   0  272.47   36.40
   8   6   0  388.06   43.40
   6  -8   0  255.17   34.30
  -8  -6   0  339.87   41.30
  -6   8   0  391.86   41.20
   6  -8   0  217.98   33.00
  -8  -6   0  363.36   43.00
  -6   8   0  290.87   35.80
   7  -8   0   81.39   24.60
   8   7   0  110.49   27.70
  -8  -7   0  110.99   27.40
  -8  -7   0   72.49   24.90
  -7   8   0  102.89   24.60
   7  -8   0  115.09   28.40
  -7   8   0  125.19   25.80
   8   7   0  119.09   26.80
   8  -8   0   42.70   24.20
  -8   8   0   82.59   25.70
  -8   8   0   65.79   21.20
   8   8   0   68.49   26.00
   8   8   0  126.49   28.90
  -8  -8   0   78.49   26.00
  -8  -8   0   46.30   24.10
   8  -8   0   67.89   24.90
  -9   8   0   48.20   20.40
  -9   8   0   33.20   20.50
   9  -8   0   25.60   26.00
  -8  -9   0   28.80   21.60
   8   9   0   27.70   21.90
   8   9   0   48.30   21.80
   9  -8   0   10.70   19.80
  -8  -9   0   30.60   24.50
   7   9   0   71.89   24.60
  -9   7   0   65.79   22.50
   9  -7   0    7.00   21.90
  -7  -9   0   72.79   24.90
  -9   7   0   63.99   22.60
  -7  -9   0   27.60   22.10
   7   9   0   90.89   26.60
   9  -7   0   21.80   21.60
  -6  -9   0   22.20   20.70
  -9   6   0    0.50   15.60
   9  -6   0   26.70   22.50
  -9   6   0    4.20   17.70
   6   9   0    0.50   20.00
  -6  -9   0   38.60   23.20
   6   9   0    5.40   17.10
   9  -6   0   23.80   22.00
  -5  -9   0  205.88   32.70
   5   9   0  198.88   30.90
   9  -5   0  151.38   28.60
  -9   5   0  153.58   26.80
   9  -5   0  157.98   29.90
  -9   5   0  188.08   30.60
   5   9   0  202.48   32.50
  -5  -9   0  175.18   30.10
  -9   4   0   65.39   22.40
  -9   4   0  111.89   25.00
   9  -4   0   92.99   26.90
   4   9   0   80.29   24.40
   4   9   0   96.19   25.40
  -4  -9   0  129.39   27.80
   9  -4   0  108.19   25.80
  -4  -9   0   72.39   24.50
   9  -3   0 2111.39   97.29
   9  -3   0 2149.58   98.99
   3   9   0 2190.28   98.39
   3   9   0 2063.69   96.99
  -9   3   0 2084.69   95.89
  -9   3   0 2199.98   98.59
  -3  -9   0 2185.68   98.29
  -3  -9   0 2098.49   97.89
  -2  -9   0   66.29   24.10
   9  -2   0   74.89   24.10
  -9   2   0   86.49   24.30
  -9   2   0  111.59   24.70
  -2  -9   0   75.79   24.10
   9  -2   0  113.79   23.80
   2   9   0   91.19   23.60
   2   9   0   73.39   24.40
   9  -1   0  107.49   26.40
   1   9   0   47.90   21.00
  -1  -9   0   55.69   22.20
   1   9   0   67.69   21.50
  -1  -9   0   56.89   22.60
   9  -1   0   82.49   24.50
  -9   1   0   95.49   24.50
  -9   1   0   73.39   21.50
   0  -9   0   17.70   19.40
   0   9   0   65.39   21.00
   0   9   0   28.90   20.10
   0  -9   0   37.70   21.40
  -9   0   0   41.30   21.40
   9   0   0   27.30   21.50
  -9   0   0   42.30   18.30
   9   0   0   39.50   21.90
   1  -9   0   83.39   23.90
  -9  -1   0   88.29   21.80
   9   1   0  108.39   25.30
  -1   9   0   49.00   20.70
  -1   9   0   47.40   22.10
   9   1   0   82.99   23.80
  -9  -1   0   59.39   22.70
  -9  -2   0  183.58   28.70
  -2   9   0  198.18   29.40
   2  -9   0  199.58   29.80
   2  -9   0  156.28   28.70
  -9  -2   0  218.28   32.80
   9   2   0  205.18   31.10
  -2   9   0  153.88   29.10
   9   2   0  147.99   27.40
   9   3   0 2385.56  106.09
   3  -9   0 2408.96  104.79
  -3   9   0 2452.35  105.69
   9   3   0 2300.47  103.59
   3  -9   0 2369.06  104.39
  -3   9   0 2392.06  103.09
  -9  -3   0 2384.16  104.49
  -9  -3   0 2216.98  102.69
   9   4   0   47.40   22.60
  -4   9   0   81.19   24.60
   9   4   0   23.70   21.90
  -9  -4   0   52.99   22.90
   4  -9   0   59.89   22.30
  -9  -4   0   82.89   24.10
   4  -9   0   40.70   21.90
  -4   9   0   62.99   22.00
   9   5   0  221.78   33.10
  -9  -5   0  201.98   30.00
  -5   9   0  220.58   31.50
   9   5   0  189.18   31.40
   5  -9   0  204.08   32.30
   5  -9   0  166.88   28.80
  -9  -5   0  240.58   34.80
   6  -9   0   36.00   23.10
   6  -9   0   26.10   22.10
   9   6   0   41.70   22.20
  -6   9   0   24.40   16.40
   9   6   0   41.90   21.70
  -9  -6   0   22.80   20.20
  -6   9   0   11.90   16.80
  -9  -6   0    8.90   20.50
  -7   9   0  123.89   27.00
  -9  -7   0   88.39   25.60
   7  -9   0   64.79   25.20
   7  -9   0   41.80   21.80
  -7   9   0   81.89   25.00
  -9  -7   0  115.39   28.30
   9   7   0   97.39   27.80
   9   7   0   68.89   25.80
  -9  -8   0   35.20   24.70
   8  -9   0    9.80   20.50
  -9  -8   0  -24.10   19.20
  -8   9   0    5.20   19.50
   9   8   0   27.20   24.40
   9   8   0    5.30   19.00
   8  -9   0  -10.90   22.70
  -8   9   0   15.20   19.10
  -9   9   0   73.69   24.60
   9   9   0   54.79   25.50
   9   9   0   86.19   28.70
  -9  -9   0   87.69   27.90
   9  -9   0   42.70   20.60
   9  -9   0   87.59   31.30
  -9  -9   0   31.30   25.70
  -9   9   0   92.79   26.50
   9  10   0  186.68   34.80
   9  10   0  132.89   32.80
 -10   9   0  150.28   30.70
  -9 -10   0  127.19   33.30
  10  -9   0  129.49   32.20
 -10   9   0  127.49   29.70
  10  -9   0  137.69   34.50
  -9 -10   0  113.49   30.40
   8  10   0   28.80   24.20
 -10   8   0  -14.80   19.40
  -8 -10   0   41.90   26.30
 -10   8   0   39.70   21.20
  10  -8   0   59.29   29.50
   8  10   0   28.20   23.30
  10  -8   0   37.60   21.60
  -8 -10   0   79.69   26.90
  10  -7   0   13.70   21.10
   7  10   0   49.80   21.90
  10  -7   0   -5.10   23.50
 -10   7   0   40.20   20.90
   7  10   0   36.70   22.70
 -10   7   0   49.40   20.60
  -7 -10   0   49.20   23.80
  -7 -10   0   50.49   24.60
  10  -6   0   84.39   27.50
   6  10   0   17.30   19.40
   6  10   0   28.40   22.40
 -10   6   0   16.40   18.20
  10  -6   0   40.50   21.80
  -6 -10   0   16.80   20.60
 -10   6   0   35.10   21.70
  -6 -10   0   42.40   22.50
  10  -5   0   26.90   22.10
 -10   5   0    8.80   19.90
  10  -5   0    9.60   19.50
  -5 -10   0  -18.60   18.30
 -10   5   0    4.30   14.40
   5  10   0   -1.50   14.90
   5  10   0    2.30   19.30
  -5 -10   0    0.00   18.70
  10  -4   0   56.89   23.70
   4  10   0   94.39   25.90
 -10   4   0   38.30   20.20
   4  10   0  108.99   25.90
 -10   4   0   76.29   22.90
  -4 -10   0   58.29   23.70
  -4 -10   0   52.69   24.70
  10  -4   0   28.00   23.20
  10  -3   0   13.70   20.20
  -3 -10   0   61.99   22.40
 -10   3   0   24.20   19.50
  10  -3   0   59.69   24.70
   3  10   0   24.30   20.70
  -3 -10   0   36.90   22.50
   3  10   0    2.50   18.90
 -10   3   0   32.30   19.60
  10  -2   0  328.97   41.50
 -10   2   0  271.37   34.90
  -2 -10   0  264.17   35.90
   2  10   0  336.67   40.80
  10  -2   0  262.67   36.30
  -2 -10   0  264.87   35.70
 -10   2   0  370.16   41.00
   2  10   0  287.37   36.30
   1  10   0    3.90   17.30
  -1 -10   0    6.20   21.00
  10  -1   0   -7.70   17.40
 -10   1   0   -0.40   16.90
  10  -1   0   12.10   21.70
   1  10   0   18.90   18.40
 -10   1   0   25.90   19.40
  -1 -10   0   15.90   19.50
  10   0   0  139.79   26.90
 -10   0   0  151.38   27.50
 -10   0   0  207.08   30.90
   0 -10   0  180.48   29.80
   0 -10   0  114.19   26.60
   0  10   0  156.98   27.70
   0  10   0  181.48   30.90
  10   0   0  179.98   31.60
 -10  -1   0   58.39   22.80
  -1  10   0   42.30   21.50
  10   1   0   39.40   21.90
  10   1   0   25.80   20.80
  -1  10   0   46.90   20.90
   1 -10   0   60.99   21.80
 -10  -1   0   27.10   19.70
   2 -10   0  223.88   32.10
 -10  -2   0  245.78   35.10
  10   2   0  343.37   41.90
  10   2   0  211.18   32.20
 -10  -2   0  241.88   33.80
   2 -10   0  243.78   33.80
  -2  10   0  226.68   32.20
  -2  10   0  272.07   36.10
  -3  10   0   12.00   19.60
  -3  10   0  -18.90   14.20
   3 -10   0   -1.00   18.80
  10   3   0  -27.50   15.60
 -10  -3   0   -6.30   16.90
  10   3   0    9.00   17.60
   3 -10   0   12.50   20.10
 -10  -3   0  -34.50   13.40
   4 -10   0   66.49   25.20
  -4  10   0   96.09   23.10
 -10  -4   0   77.79   23.70
  -4  10   0  117.99   26.70
  10   4   0  105.99   27.40
   4 -10   0   91.99   26.30
 -10  -4   0   16.90   21.60
  10   4   0   86.29   24.70
 -10  -5   0   25.10   20.80
  -5  10   0    7.90   16.90
  10   5   0   -5.20   19.50
   5 -10   0    8.90   20.00
 -10  -5   0   11.70   21.50
  10   5   0   12.40   21.40
   5 -10   0    7.40   19.80
 -10  -6   0   42.30   23.20
   6 -10   0    0.10   19.80
  10   6   0   35.00   22.30
 -10  -6   0   73.69   25.40
   6 -10   0   41.10   24.80
  -6  10   0   20.10   18.50
  10   6   0   30.40   20.90
 -10  -7   0   14.80   21.80
  -7  10   0  -27.00   14.30
   7 -10   0   25.10   21.60
 -10  -7   0   20.80   21.40
  10   7   0   32.10   23.60
  -7  10   0   17.10   17.90
  10   7   0   42.40   21.80
   7 -10   0   37.60   25.20
   8 -10   0   75.19   23.40
  -8  10   0   62.29   25.50
  10   8   0   40.60   26.60
 -10  -8   0   52.49   28.10
  -8  10   0   95.99   25.80
   8 -10   0  100.39   31.20
 -10  -8   0   56.99   27.10
  10   8   0   96.79   27.90
 -10  -9   0   58.49   28.40
  10   9   0   76.59   29.00
  -9  10   0   82.09   26.00
   9 -10   0   92.99   32.30
   9 -10   0  124.99   32.40
 -10  -9   0   88.69   27.80
  -9  10   0   48.60   24.70
  10   9   0   42.20   25.30
  10  10   0   31.00   26.90
 -10  10   0   15.50   23.70
  10 -10   0   22.20   25.80
 -10  10   0   53.79   26.30
 -10 -10   0  -27.10   25.80
 -10 -10   0   58.19   27.70
  10 -10   0   10.40   29.30
  10  10   0   58.39   29.00
 -10 -11   0   -0.40   25.30
  11 -10   0  -15.50   23.90
 -11  10   0   28.70   23.30
 -11  10   0   42.90   26.70
  10  11   0   18.50   28.00
  11 -10   0    0.60   26.70
  10  11   0   21.80   28.00
 -10 -11   0   18.90   28.20
 -11   9   0  139.19   31.90
  -9 -11   0  139.19   37.70
 -11   9   0  113.69   32.70
  -9 -11   0  117.09   35.20
   9  11   0  108.79   33.70
   9  11   0  117.19   34.30
  11  -9   0  126.39   36.70
  11  -9   0   79.79   30.40
  -8 -11   0   17.40   23.10
   8  11   0   47.00   26.80
  11  -8   0   39.90   25.70
   8  11   0   29.40   25.60
 -11   8   0   38.20   23.80
  11  -8   0   43.50   26.50
 -11   8   0   19.90   22.40
  -8 -11   0   27.60   26.90
  -7 -11   0   27.70   22.50
   7  11   0   34.60   25.80
 -11   7   0    3.50   17.80
  -7 -11   0   54.89   27.20
  11  -7   0   24.90   25.80
 -11   7   0   41.30   23.20
  11  -7   0   13.10   21.50
   7  11   0   81.89   27.60
  11  -6   0   30.80   26.60
 -11   6   0    8.90   18.80
   6  11   0   45.70   23.70
  -6 -11   0   71.89   28.90
  11  -6   0   54.09   24.70
   6  11   0   18.90   21.50
  -6 -11   0   45.80   24.00
 -11   6   0   43.90   22.00
 -11   5   0   20.70   19.00
   5  11   0  -21.30   17.30
  11  -5   0   -9.20   20.40
 -11   5   0   12.50   18.80
  -5 -11   0   42.70   25.30
  -5 -11   0   12.30   22.30
   5  11   0    7.40   19.00
  11  -5   0   39.10   26.00
  -4 -11   0  158.08   31.60
   4  11   0   96.69   27.10
 -11   4   0  164.08   29.80
   4  11   0  166.38   32.00
  11  -4   0  128.49   26.80
 -11   4   0  165.48   30.10
  11  -4   0  160.38   31.70
  -4 -11   0  165.88   31.60
  -3 -11   0  201.18   34.80
  11  -3   0  135.79   28.50
  11  -3   0  182.58   32.00
  -3 -11   0  189.48   32.10
 -11   3   0  213.08   33.30
 -11   3   0  181.68   30.80
   3  11   0  210.38   34.70
   3  11   0  199.08   32.70
 -11   2   0   63.69   20.80
  11  -2   0  119.99   28.50
   2  11   0   94.79   26.50
 -11   2   0   88.09   25.20
  11  -2   0   95.89   26.70
  -2 -11   0   54.69   23.90
  -2 -11   0  100.09   24.80
   2  11   0   74.39   22.00
  11  -1   0   45.80   22.70
  -1 -11   0   17.70   20.70
 -11   1   0   24.40   21.90
   1  11   0   55.89   23.60
  11  -1   0   32.00   22.20
   1  11   0   70.39   21.30
 -11   1   0   33.20   20.10
  -1 -11   0   43.30   21.60
   0 -11   0  -15.90   19.00
 -11   0   0   10.00   16.30
   0  11   0   -0.50   18.00
  11   0   0  -27.20   16.00
   0  11   0    8.70   16.10
 -11   0   0   -8.00   20.20
  11   0   0  -19.80   20.00
   0 -11   0    1.10   19.50
   1 -11   0   21.30   19.70
  -1  11   0   29.20   20.90
  -1  11   0   34.00   18.40
  11   1   0   25.90   22.30
 -11  -1   0   12.50   21.80
  11   1   0  -13.40   18.50
 -11  -1   0   19.00   18.50
   2 -11   0  164.98   29.90
  -2  11   0  158.58   31.50
 -11  -2   0  131.29   30.30
 -11  -2   0  146.49   28.80
  11   2   0  130.09   28.90
  -2  11   0  110.89   25.30
   2 -11   0  102.69   27.40
  11   2   0   92.19   27.10
  -3  11   0  215.68   32.70
   3 -11   0  245.48   35.60
  11   3   0  211.78   34.20
   3 -11   0  168.38   30.90
  -3  11   0  166.38   31.80
 -11  -3   0  208.78   34.50
  11   3   0  206.28   35.10
 -11  -3   0  169.28   30.40
  -4  11   0  129.99   30.60
   4 -11   0  125.89   31.20
   4 -11   0  147.19   29.60
 -11  -4   0  125.49   29.60
  -4  11   0  128.59   28.00
  11   4   0  118.29   29.30
 -11  -4   0  103.79   25.30
  11   4   0  117.39   28.30
   5 -11   0   21.70   23.60
  -5  11   0   32.80   24.30
 -11  -5   0    7.50   19.00
  11   5   0   15.10   19.70
 -11  -5   0   71.49   25.70
  11   5   0   49.00   22.70
  -5  11   0   21.10   19.20
   5 -11   0   41.20   22.00
  11   6   0  -13.70   20.30
  -6  11   0    3.00   17.10
   6 -11   0   56.19   26.50
 -11  -6   0   41.90   25.40
   6 -11   0  -18.10   19.10
 -11  -6   0   33.50   23.50
  11   6   0   47.00   24.60
   7 -11   0   98.49   30.20
 -11  -7   0   51.79   26.20
   7 -11   0   52.09   25.30
  11   7   0   42.20   25.30
  11   7   0   -6.50   22.00
 -11  -7   0    6.40   22.80
  -7  11   0   49.90   21.70
 -11  -8   0   14.20   24.60
   8 -11   0   43.50   24.00
 -11  -8   0    5.90   22.20
   8 -11   0    8.00   25.00
  -8  11   0   33.10   22.20
  -8  11   0   11.50   21.20
  11   8   0   29.30   23.10
  11   8   0   13.10   21.80
  11   9   0  147.89   35.40
  -9  11   0  117.89   31.60
  -9  11   0   71.79   32.70
 -11  -9   0  133.59   35.00
   9 -11   0  103.89   32.10
 -11  -9   0  128.79   36.00
   9 -11   0  140.49   38.30
  11   9   0  137.99   35.20
 -11 -10   0   67.79   33.60
  11  10   0   23.20   34.20
  10 -11   0   -6.90   25.70
 -10  11   0   22.30   21.60
 -11 -10   0    0.30   25.80
  10 -11   0    4.10   29.40
  11  10   0   28.10   28.50
 -10  11   0  -11.60   21.90
  11 -11   0  205.48   43.10
 -11 -11   0  252.07   45.10
 -11 -11   0  246.28   44.20
  11  11   0  270.47   47.00
  11  11   0  222.48   44.00
 -11  11   0  177.38   37.30
 -11  11   0  189.08   35.80
  11  12   0   79.89   33.50
 -11 -12   0  109.79   33.10
  11  12   0   90.89   32.40
 -11 -12   0   47.90   34.60
 -12  11   0   58.59   26.30
  12 -11   0   30.00   31.10
 -12  11   0   82.39   29.50
  12 -11   0   80.89   47.60
  12 -10   0  159.38   42.90
  10  12   0  200.58   41.10
  12 -10   0  195.28   42.80
 -10 -12   0  174.58   38.00
 -12  10   0  164.28   36.00
  10  12   0  252.47   45.10
 -10 -12   0  271.57   47.60
 -12  10   0  201.68   39.30
 -12   9   0   75.79   27.80
  12  -9   0  132.69   36.00
  -9 -12   0   62.89   32.60
 -12   9   0  101.39   29.70
   9  12   0  121.79   34.20
  -9 -12   0   87.79   33.40
  12  -9   0   84.29   32.90
   9  12   0   45.00   28.80
  12  -8   0  133.99   36.20
  -8 -12   0  144.09   36.30
   8  12   0  128.99   40.30
  -8 -12   0  103.49   33.90
 -12   8   0   99.89   29.30
   8  12   0   56.39   30.80
  12  -8   0  105.29   34.50
  12  -7   0   -1.30   22.30
   7  12   0   19.50   23.90
  -7 -12   0    4.80   27.10
 -12   7   0    1.20   21.50
   7  12   0   48.00   27.30
  12  -7   0  -24.50   25.30
 -12   7   0    8.70   21.60
  -7 -12   0    4.00   24.10
  12  -6   0   17.70   25.30
 -12   6   0   13.20   20.60
  -6 -12   0   17.60   25.60
   6  12   0    1.10   23.10
  -6 -12   0   10.70   24.00
 -12   6   0   32.40   23.40
   6  12   0   54.89   25.80
  12  -6   0   40.30   27.20
  12  -5   0   -4.80   20.40
 -12   5   0   14.50   18.80
   5  12   0   -9.30   20.40
   5  12   0    8.80   18.60
  -5 -12   0    7.40   23.40
  12  -5   0  -19.20   22.50
 -12   5   0   21.10   21.10
  -5 -12   0   -2.90   21.40
   4  12   0   20.00   21.30
  -4 -12   0   -6.80   23.40
  12  -4   0   15.20   23.90
 -12   4   0   24.30   19.40
  -4 -12   0  -17.80   19.00
  12  -4   0   18.30   22.00
 -12   4   0   10.90   18.10
   4  12   0    5.70   20.30
  12  -3   0  -14.20   18.60
  -3 -12   0   21.40   24.40
   3  12   0  -13.20   15.60
 -12   3   0    6.60   18.40
  -3 -12   0   38.90   23.50
   3  12   0   10.70   20.60
  12  -3   0   29.80   27.10
 -12   3   0   46.30   22.40
   2  12   0   -7.30   19.70
  12  -2   0   25.40   21.50
 -12   2   0    8.50   16.70
 -12   2   0   29.90   20.20
  12  -2   0   30.50   25.30
   2  12   0    7.50   17.90
  -2 -12   0   12.00   20.50
  -2 -12   0   29.80   23.90
   1  12   0   -2.40   18.40
 -12   1   0    2.30   19.90
  12  -1   0    8.80   21.70
 -12   1   0    3.20   17.60
  -1 -12   0    2.70   21.30
  -1 -12   0   18.50   22.10
  12  -1   0  -10.40   22.20
   1  12   0   -8.70   18.60
 -12   0   0  118.29   29.90
   0  12   0  119.19   27.70
   0 -12   0  109.39   27.70
   0  12   0   54.89   25.70
  12   0   0   89.89   28.60
  12   0   0  146.89   31.50
 -12   0   0  137.79   28.00
  12   1   0   39.80   24.20
  -1  12   0   15.80   19.10
  12   1   0    7.80   20.30
 -12  -1   0   11.70   16.70
   1 -12   0   -6.40   19.70
  -1  12   0   -2.50   19.60
 -12  -1   0  -15.90   16.90
  12   2   0   19.30   22.30
  -2  12   0   19.60   19.50
 -12  -2   0   28.90   20.30
  -2  12   0   31.70   22.00
   2 -12   0   58.59   26.70
  12   2   0   33.00   23.60
 -12  -2   0   55.69   24.70
   2 -12   0    9.10   22.00
 -12  -3   0   -0.20   19.30
   3 -12   0   30.30   22.30
   3 -12   0   25.30   24.60
  12   3   0   -5.10   21.40
 -12  -3   0   29.20   23.20
  -3  12   0   -0.40   15.40
  -3  12   0    9.20   20.90
  12   3   0    8.90   22.30
  12   4   0   27.60   24.50
 -12  -4   0    2.50   19.20
 -12  -4   0   29.30   24.30
  12   4   0   -1.70   22.90
   4 -12   0  -12.60   22.30
   4 -12   0   24.70   22.60
  -4  12   0   24.30   20.00
  -4  12   0   13.50   21.90
  12   5   0   14.10   23.60
  -5  12   0    5.70   17.40
   5 -12   0   38.30   26.80
   5 -12   0   18.00   22.30
 -12  -5   0   32.70   23.50
  -5  12   0   50.49   24.80
  12   5   0    3.40   21.40
 -12  -5   0    6.60   23.20
   6 -12   0   16.10   26.40
  -6  12   0    6.70   21.50
  12   6   0   13.80   24.90
 -12  -6   0   -9.70   20.60
 -12  -6   0   24.60   23.00
  12   6   0   -3.70   19.50
   6 -12   0   15.00   24.60
  -6  12   0  -18.70   17.60
 -12  -7   0   28.30   25.30
 -12  -7   0   29.80   26.40
  12   7   0  -16.70   22.50
  12   7   0   12.50   25.10
   7 -12   0   -9.10   19.60
   7 -12   0   11.00   27.80
  -7  12   0   29.20   22.80
   8 -12   0   71.49   32.70
  12   8   0  113.49   31.40
 -12  -8   0   82.09   31.90
 -12  -8   0   90.19   31.00
  12   8   0   60.69   30.50
  -8  12   0   85.89   28.50
   8 -12   0   74.19   32.50
  12   9   0  192.08   46.50
   9 -12   0  106.19   33.60
  -9  12   0  114.29   31.30
 -12  -9   0  217.68   42.60
 -12  -9   0   88.09   39.10
   9 -12   0  116.39   36.90
  12   9   0  142.49   36.80
  12  10   0  154.48   39.30
  10 -12   0  162.48   41.10
 -10  12   0  122.19   33.00
  10 -12   0  169.88   56.39
 -10  12   0  110.59   32.50
 -12 -10   0  200.18   40.80
 -12 -10   0  219.88   45.30
  12  10   0  186.68   39.60
  11 -12   0  132.69   39.50
 -12 -11   0   96.29   38.80
 -11  12   0  125.59   32.60
  12  11   0  141.89   39.10
 -12 -11   0  118.79   33.50
 -11  12   0  132.29   33.10
  12  11   0  147.89   37.20
 -12  12   0  -11.30   23.50
  12 -12   0   28.30   34.40
 -12 -12   0    5.90   29.40
  12  12   0  -16.30   26.80
 -12  12   0    9.00   21.40
  12  12   0  -20.80   28.40
  12 -12   0   27.50   34.20
 -12 -12   0   32.80   35.90
  13 -12   0   36.80   38.70
  12  13   0   13.50   38.00
 -12 -13   0   -2.20   25.90
  12  13   0    4.40   30.00
 -13  12   0   28.60   23.60
 -12 -13   0   28.20   37.10
 -13  12   0    2.90   26.40
  13 -12   0   -6.50   29.60
 -13  11   0   16.20   27.50
  13 -11   0  -38.20   30.60
  13 -11   0    8.40   32.10
 -11 -13   0  106.69   36.00
  11  13   0   14.60   30.90
 -11 -13   0   49.80   35.80
  11  13   0   14.40   31.90
 -13  11   0    1.80   24.20
 -10 -13   0  122.19   44.80
 -13  10   0   90.49   33.30
  13 -10   0   64.59   36.10
 -13  10   0   98.19   28.80
 -10 -13   0   95.09   36.30
  10  13   0   95.59   35.30
  10  13   0  127.19   35.00
  13  -9   0   35.30   31.40
  -9 -13   0   62.69   32.20
   9  13   0   65.19   33.30
   9  13   0   12.80   27.10
  13  -9   0  100.59   38.20
 -13   9   0    6.80   24.60
  -9 -13   0    8.20   33.10
 -13   9   0    2.20   21.80
  13  -8   0  150.48   40.50
  -8 -13   0  119.69   55.49
   8  13   0  185.78   38.60
   8  13   0  119.39   32.80
  -8 -13   0  171.58   41.90
 -13   8   0  135.09   33.20
 -13   8   0  134.09   31.00
  13  -8   0  229.38   55.19
 -13   7   0  -17.70   23.70
  13  -7   0    1.10   24.80
   7  13   0   72.89   31.60
  13  -7   0   64.59   31.30
  -7 -13   0   54.49   30.60
   7  13   0   17.30   27.70
  -7 -13   0   13.90   26.40
 -13   7   0    4.10   19.70
   6  13   0   -1.00   24.90
   6  13   0  -30.40   24.00
  -6 -13   0   12.20   26.10
  13  -6   0   16.20   25.50
 -13   6   0   17.10   25.80
  13  -6   0    3.20   28.30
  -6 -13   0    6.90   28.30
 -13   6   0   24.70   24.70
   5  13   0   11.00   23.40
  -5 -13   0   11.00   22.80
  13  -5   0   -6.20   24.00
   5  13   0   13.20   23.00
 -13   5   0   21.20   23.10
  -5 -13   0  -34.40   22.30
  13  -5   0  -16.30   22.00
 -13   5   0   14.30   20.20
  13  -4   0  -15.10   19.50
 -13   4   0   34.20   21.90
  13  -4   0   17.40   24.60
 -13   4   0   32.80   21.70
   4  13   0   25.00   23.50
   4  13   0  -17.70   19.30
  -4 -13   0    3.00   23.70
  -4 -13   0    0.00   23.20
  -3 -13   0   43.70   28.50
   3  13   0   63.49   28.60
  13  -3   0   14.10   23.70
   3  13   0   34.50   23.60
 -13   3   0   49.20   22.20
  13  -3   0   29.80   26.80
  -3 -13   0   30.40   28.10
 -13   3   0   14.90   20.40
  13  -2   0   67.09   27.30
  -2 -13   0   44.60   26.40
   2  13   0   -1.40   17.90
 -13   2   0   62.89   27.50
   2  13   0  -21.90   19.40
 -13   2   0  -11.00   18.00
  -2 -13   0   -2.60   23.50
  13  -2   0   -6.60   22.00
  -1 -13   0  125.39   31.40
   1  13   0   51.99   22.70
  13  -1   0   66.19   25.20
   1  13   0  108.99   29.90
 -13   1   0   67.29   26.40
  13  -1   0  102.09   29.20
  -1 -13   0   54.59   25.90
 -13   1   0   90.09   25.40
  13   0   0   44.60   26.70
   0  13   0   36.90   21.70
 -13   0   0    0.30   20.10
   0  13   0   21.90   22.30
  13   0   0   26.90   23.00
 -13   0   0   44.80   21.90
   0 -13   0   62.39   26.60
  13   1   0   37.30   24.50
   1 -13   0   54.49   25.80
 -13  -1   0   77.99   27.70
   1 -13   0   50.59   26.80
  -1  13   0   16.40   19.70
  -1  13   0   71.39   26.90
 -13  -1   0   23.90   21.10
  13   1   0   62.69   28.20
  13   2   0   48.10   27.20
 -13  -2   0   12.40   24.70
  13   2   0   34.60   27.00
   2 -13   0    5.70   23.50
  -2  13   0   57.19   25.30
 -13  -2   0   11.60   20.50
   2 -13   0   33.20   27.10
  -2  13   0   -7.00   18.10
  13   3   0   10.50   23.60
 -13  -3   0   29.20   23.70
 -13  -3   0   40.70   26.50
  13   3   0   66.49   25.80
   3 -13   0   91.99   31.20
  -3  13   0   44.60   24.10
   3 -13   0   37.30   26.70
  -3  13   0    2.50   23.00
  13   4   0   45.80   27.30
   4 -13   0   17.10   22.70
  -4  13   0   15.40   19.90
 -13  -4   0   11.30   19.80
 -13  -4   0   15.40   23.60
  13   4   0    1.80   23.00
  -4  13   0   -4.90   20.70
   4 -13   0    9.20   23.80
 -13  -5   0   13.40   24.20
 -13  -5   0   40.30   26.70
  -5  13   0    8.20   21.20
   5 -13   0   10.80   23.60
   5 -13   0  -12.20   25.20
  13   5   0   71.49   29.90
  13   5   0   20.20   24.90
  -5  13   0   48.10   27.20
   6 -13   0   27.50   27.50
 -13  -6   0   19.70   25.10
 -13  -6   0   11.60   24.40
  13   6   0   14.50   27.90
   6 -13   0  -30.50   22.60
  -6  13   0    0.80   21.10
  13   6   0  -21.20   21.80
   7 -13   0   35.10   28.70
 -13  -7   0  -34.90   22.00
 -13  -7   0   33.50   28.50
  13   7   0   11.30   37.40
  -7  13   0   35.00   25.60
  13   7   0   58.49   29.80
   7 -13   0   34.80   29.30
  -7  13   0  -10.00   23.10
  -8  13   0  126.69   32.70
  13   8   0  104.79   36.10
   8 -13   0  104.39   36.10
 -13  -8   0  203.18   44.00
  13   8   0  117.59   36.80
   8 -13   0  184.18   41.90
 -13  -8   0  146.49   36.90
 -13  -9   0   71.19   36.00
   9 -13   0    0.80   27.40
  -9  13   0   14.80   26.90
 -13  -9   0   50.89   29.90
  13   9   0   12.30   28.90
   9 -13   0   82.79   36.20
  13   9   0    4.80   30.10
 -10  13   0  177.18   37.60
  13  10   0  164.38   41.40
  10 -13   0  150.98   56.69
 -13 -10   0  151.58   37.30
  10 -13   0  107.39   37.20
  13  10   0  146.39   37.60
 -13 -10   0  204.38   45.00
 -13 -11   0  -39.40   30.60
 -13 -11   0   12.10   25.50
  11 -13   0  -33.80   30.90
  13  11   0   11.40   32.90
  13  11   0    1.90   28.60
  11 -13   0   27.90   31.00
 -11  13   0   -1.90   24.30
 -11  13   0   24.00   26.60
  13  12   0   49.80   32.90
 -13 -12   0   24.90   30.40
 -13 -12   0   23.80   35.90
  12 -13   0   68.89   34.20
 -12  13   0   -5.50   23.20
  13  12   0  -57.39   32.60
 -12  13   0    9.30   27.50
  12 -13   0   -4.70   35.90
  13 -13   0   41.20   36.40
 -13 -13   0   18.10   29.30
  13  13   0   25.60   32.80
 -13  13   0    9.40   24.50
 -13  13   0    9.70   26.70
  13 -13   0  -54.59   34.40
 -13 -13   0  -85.49   30.80
  13  13   0  -17.70   30.80
 -13 -14   0  -24.30   34.80
 -14  13   0  -42.30   25.80
 -14  13   0   36.10   27.30
  14 -13   0  -11.70   35.10
  13  14   0   20.30   32.80
 -13 -14   0   25.20   34.80
  13  14   0   -4.50   34.20
  14 -13   0  -76.39   35.00
  14 -12   0   23.70   36.30
  12  14   0   15.30   32.90
 -12 -14   0   -5.80   31.50
  14 -12   0  -40.70   34.70
 -12 -14   0   48.30   40.70
 -14  12   0   37.40   29.80
 -14  12   0    5.10   26.50
  12  14   0   -9.30   29.30
  14 -11   0   -3.90   36.70
 -14  11   0   15.50   22.00
 -11 -14   0   21.80   31.60
  14 -11   0  -37.00   30.20
  11  14   0   -1.70   26.40
 -14  11   0   31.50   32.30
  11  14   0    8.70   40.10
 -11 -14   0  -12.10   33.80
 -14  10   0   52.89   27.10
  14 -10   0   30.50   32.80
 -10 -14   0   43.80   36.50
 -14  10   0   21.60   25.00
  10  14   0   54.79   33.90
  14 -10   0   -9.60   31.70
 -10 -14   0   75.99   34.50
  10  14   0   82.69   34.10
   9  14   0  -25.70   25.90
 -14   9   0   36.80   27.10
  -9 -14   0    7.50   29.90
  14  -9   0   42.10   41.80
 -14   9   0   33.10   24.50
   9  14   0   15.10   28.20
  14  -9   0  -28.90   28.40
  -9 -14   0   15.60   50.49
   8  14   0   60.99   30.50
  14  -8   0  -11.00   31.20
  -8 -14   0   12.10   28.90
   8  14   0    2.90   27.10
  -8 -14   0   24.70   34.90
 -14   8   0   30.60   26.40
 -14   8   0    7.80   24.20
  14  -8   0   48.80   29.50
 -14   7   0   -9.00   24.50
  14  -7   0   89.19   36.40
  -7 -14   0   25.00   31.10
 -14   7   0   17.60   25.50
   7  14   0   14.60   28.50
   7  14   0  -14.30   23.90
  -7 -14   0  -21.10   25.60
  14  -7   0   28.40   31.00
 -14   6   0    6.20   20.10
  -6 -14   0  -10.60   30.50
  -6 -14   0   30.30   31.40
   6  14   0   42.50   27.50
  14  -6   0   18.40   34.00
  14  -6   0  -22.60   25.00
 -14   6   0   52.69   25.90
   6  14   0   28.70   25.30
 -14   5   0    4.70   22.60
 -14   5   0    5.70   25.30
  14  -5   0   -6.90   23.40
  -5 -14   0   19.70   27.10
   5  14   0   -2.90   23.90
  14  -5   0   -5.40   27.10
   5  14   0    7.90   26.00
  -5 -14   0  -41.40   25.00
   4  14   0   27.50   34.80
 -14   4   0    8.10   24.30
  -4 -14   0  -12.80   25.90
   4  14   0   -9.40   23.30
  14  -4   0    3.10   28.10
  14  -4   0  -37.70   25.90
  -4 -14   0  -21.40   25.10
   3  14   0   33.80   35.90
  14  -3   0   21.80   27.60
 -14   3   0   45.10   26.10
   3  14   0    9.50   23.50
  14  -3   0  -15.00   28.20
 -14   3   0   53.79   26.90
  -3 -14   0   43.10   30.70
  -3 -14   0   13.10   27.40
 -14   2   0  116.99   29.20
  -2 -14   0   76.49   33.50
   2  14   0  104.99   34.60
 -14   2   0   75.59   28.70
  14  -2   0   50.89   29.30
   2  14   0   46.90   28.20
  14  -2   0   65.49   31.80
  -2 -14   0   71.19   32.80
  14  -1   0   43.50   29.60
 -14   1   0   43.60   26.90
  -1 -14   0  -40.70   23.70
   1  14   0  -22.60   20.00
  14  -1   0    8.10   25.30
 -14   1   0   27.50   22.00
   1  14   0   39.90   27.80
  -1 -14   0   -2.40   23.70
  14   0   0  514.75   57.19
 -14   0   0  321.57   43.60
 -14   0   0  365.06   48.40
   0  14   0  335.27   47.50
  14   0   0  478.55   57.59
   0 -14   0  265.77   41.20
   0  14   0  354.76   47.30
  14   1   0   31.90   28.90
   1 -14   0   20.10   27.90
  -1  14   0   14.70   23.10
   1 -14   0   21.10   26.30
 -14  -1   0   21.10   21.60
  14   1   0   51.49   28.70
 -14  -1   0   40.40   27.40
  -1  14   0    6.40   25.00
  -2  14   0   91.69   33.10
   2 -14   0   83.39   32.50
  14   2   0   83.39   31.80
 -14  -2   0   83.09   28.00
   2 -14   0   51.39   29.10
 -14  -2   0   65.69   30.00
  14   2   0   92.89   33.70
  -2  14   0   65.79   28.00
  14   3   0   29.50   28.50
  -3  14   0   33.90   24.40
   3 -14   0   66.69   30.60
 -14  -3   0   30.90   25.60
   3 -14   0   -6.50   25.70
  14   3   0   58.39   30.40
 -14  -3   0   10.50   24.30
  -4  14   0  -13.50   25.90
 -14  -4   0  -18.80   22.80
  14   4   0   32.80   25.00
  14   4   0   -5.00   26.50
 -14  -4   0   37.50   24.80
   4 -14   0  -26.70   27.80
   4 -14   0   -6.10   26.70
  -4  14   0   -5.50   21.90
   5 -14   0    0.80   22.90
 -14  -5   0   37.40   52.49
  -5  14   0   30.50   25.40
 -14  -5   0    6.70   23.10
   5 -14   0  -25.30   24.50
  14   5   0   13.00   27.20
  -5  14   0   12.60   26.90
 -14  -6   0   35.00   26.20
  14   6   0    4.50   27.50
   6 -14   0    4.00   29.90
  -6  14   0   93.59   32.60
   6 -14   0   53.09   31.90
  -6  14   0   -1.80   25.00
  14   6   0   -3.60   27.30
 -14  -6   0   13.70   30.30
  -7  14   0   55.69   32.30
 -14  -7   0   80.39   33.60
  14   7   0    1.80   30.20
   7 -14   0   49.10   31.70
  14   7   0   43.90   31.30
 -14  -7   0   67.59   30.50
  -7  14   0   38.90   27.00
 -14  -8   0    2.60   30.90
  -8  14   0   31.20   31.20
  14   8   0   27.80   31.00
  14   8   0   73.59   32.20
 -14  -8   0   12.60   28.60
   8 -14   0   11.50   30.60
  -8  14   0   63.59   26.90
   8 -14   0   21.70   41.40
   9 -14   0   48.70   34.70
 -14  -9   0   46.10   36.60
  14   9   0   53.19   33.70
  -9  14   0   36.30   26.00
 -14  -9   0   12.40   33.00
  14   9   0    1.10   30.50
   9 -14   0   29.40   37.30
 -14 -10   0   24.80   35.20
  14  10   0   46.80   33.50
  10 -14   0   68.99   38.90
  10 -14   0    9.70   31.40
 -14 -10   0   43.80   33.10
 -10  14   0   35.70   28.70
  14  10   0   31.00   37.40
  14  11   0   36.80   32.50
 -11  14   0   -4.00   26.90
 -14 -11   0  -28.80   31.40
 -14 -11   0   61.49   34.10
  11 -14   0  -12.80   35.60
  11 -14   0   -1.10   31.60
  14  11   0    5.70   33.00
 -14 -12   0  -18.20   33.80
  12 -14   0   12.70   41.00
  14  12   0  -20.50   29.30
  12 -14   0   29.90   36.00
 -14 -12   0   21.50   29.40
 -12  14   0   26.20   29.00
  14  12   0  -44.90   29.80
 -13  14   0  -36.50   26.30
  13 -14   0   -8.00   33.80
  13 -14   0  -37.60   38.20
  14  13   0  -15.90   31.90
 -13  14   0    8.30   27.30
  14  13   0  -60.59   28.00
 -14 -13   0  -24.20   35.80
 -14 -13   0   11.60   33.00
 -14 -14   0    4.00   39.30
  14  14   0   85.89   39.20
  14 -14   0  -19.10   38.60
 -14  14   0   14.80   31.40
  14  14   0  -40.80   35.20
  14 -14   0  -47.80   31.30
 -14  14   0   31.80   25.50
 -14 -14   0   37.20   40.40
  14  15   0  -34.20   37.80
 -15  14   0    9.60   31.50
  15 -14   0  -40.40   35.40
  14  15   0   37.40   37.70
 -14 -15   0  -60.79   29.60
 -15  14   0   34.50   29.30
 -14 -15   0  -43.80   33.50
  15 -14   0  -40.20   31.90
 -15  13   0    5.20   30.50
 -15  13   0    3.60   23.70
  15 -13   0   36.80   43.20
  15 -13   0  -27.60   34.80
 -13 -15   0  -61.49   33.10
  13  15   0  -47.00   34.40
 -13 -15   0   -1.00   39.40
  13  15   0   45.60   33.30
  12  15   0  -41.60   32.20
 -12 -15   0  -55.29   36.30
  15 -12   0   -4.30   37.20
  15 -12   0  -62.29   30.30
 -15  12   0  -39.30   19.90
 -15  12   0  -23.50   25.50
 -12 -15   0   -3.10   34.60
  12  15   0   10.00   31.80
  11  15   0  -22.10   30.30
  15 -11   0   -6.60   34.70
 -15  11   0   24.80   28.80
  15 -11   0   19.90   35.80
 -15  11   0  -21.20   25.20
 -11 -15   0  -58.79   36.10
  11  15   0  -32.00   30.10
 -11 -15   0   15.70   33.80
  15 -10   0    0.80   36.60
  10  15   0  -14.80   27.50
 -10 -15   0  -85.39   30.60
  10  15   0  -16.30   28.90
 -15  10   0   10.60   23.50
 -10 -15   0    8.50   31.90
 -15  10   0    7.00   43.00
  15 -10   0  -73.49   27.80
 -15   9   0    2.50   27.40
  -9 -15   0   53.99   38.10
   9  15   0   10.10   30.50
  -9 -15   0    3.00   27.70
  15  -9   0   23.40   34.60
 -15   9   0   35.40   24.20
  15  -9   0   -2.10   29.50
   9  15   0   16.10   31.50
 -15   8   0   51.09   26.00
  15  -8   0   82.39   36.00
 -15   8   0   39.60   30.10
  -8 -15   0  117.19   39.70
   8  15   0   23.90   30.60
  -8 -15   0   42.30   36.10
   8  15   0    6.60   29.40
  15  -8   0   20.00   33.30
  -7 -15   0   14.00   31.00
 -15   7   0   -7.40   22.60
  15  -7   0   18.30   35.90
 -15   7   0   79.59   30.80
   7  15   0   48.30   28.10
   7  15   0   30.00   29.00
  15  -7   0    5.50   32.10
  -7 -15   0    0.20   47.60
 -15   6   0   12.90   24.20
  -6 -15   0  -43.70   32.50
  15  -6   0   21.70   30.40
  15  -6   0   38.60   31.20
   6  15   0   25.60   30.00
  -6 -15   0   18.80   29.00
 -15   6   0   -3.70   23.50
   6  15   0   20.60   27.60
  15  -5   0  -30.30   28.00
 -15   5   0  -41.90   21.30
  -5 -15   0   -8.30   31.70
   5  15   0   13.20   26.40
  15  -5   0   23.80   34.30
 -15   5   0   -5.40   20.90
  -5 -15   0   22.30   30.30
   5  15   0  -11.00   25.00
   4  15   0   45.40   30.00
  -4 -15   0   97.19   35.90
  15  -4   0   61.99   35.50
   4  15   0  125.19   35.60
  15  -4   0   98.19   38.50
 -15   4   0   76.89   27.30
 -15   4   0   67.29   29.10
  -3 -15   0  -23.20   29.00
   3  15   0   18.70   26.20
  -3 -15   0   12.30   30.80
 -15   3   0   16.20   22.20
   3  15   0    7.60   27.30
 -15   3   0    6.40   18.80
  15  -3   0    0.80   26.50
 -15   2   0  112.29   30.50
   2  15   0   42.40   28.40
  15  -2   0  101.19   35.30
  -2 -15   0   -3.70   29.20
  15  -2   0   44.80   41.90
   2  15   0   44.70   28.00
 -15   2   0   96.29   29.90
  -2 -15   0   40.80   28.30
  -1 -15   0  103.09   32.00
   1  15   0   67.99   28.80
  15  -1   0   72.79   40.60
 -15   1   0   77.49   28.40
   1  15   0   83.39   32.10
  15  -1   0   56.89   33.40
 -15   1   0   61.39   27.30
   0  15   0   23.10   25.70
 -15   0   0    5.00   25.00
 -15   0   0   33.50   28.10
  15   0   0   28.30   36.40
   0 -15   0  -18.50   21.80
  15   0   0  -13.80   28.50
   0  15   0   52.69   28.60
  -1  15   0   31.00   27.70
   1 -15   0   55.79   30.30
  15   1   0   74.89   34.50
 -15  -1   0   92.89   33.10
 -15  -1   0   64.89   27.70
   1 -15   0   44.70   27.60
  -1  15   0   36.80   27.20
   2 -15   0  139.19   37.10
   2 -15   0   78.99   31.30
 -15  -2   0   78.19   29.70
  -2  15   0   56.79   29.50
  15   2   0   61.79   49.00
 -15  -2   0  122.09   36.80
  15   2   0   75.29   33.60
  -2  15   0   21.10   26.70
  -3  15   0    5.50   25.90
  -3  15   0   30.20   26.70
  15   3   0  -47.30   24.90
  15   3   0   25.20   29.70
   3 -15   0   46.30   32.20
   3 -15   0   18.40   31.80
 -15  -3   0   47.70   30.50
 -15  -3   0   22.10   26.20
 -15  -4   0  105.49   33.50
  -4  15   0   77.29   34.60
  15   4   0  104.19   36.20
   4 -15   0  107.49   35.10
  -4  15   0   66.09   28.70
  15   4   0   34.20   29.40
 -15  -4   0  123.89   35.20
   4 -15   0   37.60   49.80
  15   5   0   -1.50   29.70
  -5  15   0   20.00   26.40
 -15  -5   0    7.30   26.70
 -15  -5   0   -9.90   26.00
   5 -15   0   17.00   32.30
  -5  15   0   15.60   28.80
   5 -15   0   40.70   31.00
  15   5   0   30.40   28.70
   6 -15   0   19.70   31.90
 -15  -6   0   47.00   31.70
  -6  15   0   -9.10   27.60
  -6  15   0   31.60   24.70
 -15  -6   0   53.89   31.40
  15   6   0   49.30   33.40
  15   6   0   30.70   30.10
   6 -15   0   20.70   44.20
 -15  -7   0   13.30   32.30
  -7  15   0   49.50   28.80
  -7  15   0   36.00   31.00
   7 -15   0   37.40   38.00
  15   7   0  -33.30   27.70
   7 -15   0   24.60   35.40
 -15  -7   0   32.00   33.00
  15   7   0   -1.20   30.10
   8 -15   0   21.10   33.80
  -8  15   0   62.29   33.40
  -8  15   0   70.49   31.80
  15   8   0   74.99   40.10
 -15  -8   0  104.29   36.60
   8 -15   0   40.80   36.10
  15   8   0   24.00   30.50
 -15  -9   0   17.70   28.70
  15   9   0   96.69   50.29
  -9  15   0   35.10   31.60
   9 -15   0   10.50   28.20
  -9  15   0   -7.00   27.20
  15   9   0  -22.40   27.50
   9 -15   0   27.60   33.40
 -15  -9   0  -16.00   30.70
 -10  15   0   -1.10   30.10
 -15 -10   0  -16.80   27.70
  15  10   0   13.30   30.00
  10 -15   0   29.70   32.00
 -10  15   0  -30.20   35.40
 -15 -10   0  -14.80   33.10
  15  10   0   -3.10   30.20
  10 -15   0   -2.40   35.20
  15  11   0  -10.90   31.10
  15  11   0  -67.89   29.10
 -11  15   0  -44.90   22.50
  11 -15   0  -43.60   29.90
 -15 -11   0   76.89   37.70
 -15 -11   0   35.20   36.70
  11 -15   0  -37.10   36.80
 -15 -12   0   16.30   32.50
  12 -15   0  -19.70   37.60
 -12  15   0   -4.00   26.70
  15  12   0    4.40   34.70
  15  12   0  -72.59   28.50
 -15 -12   0  -66.99   32.70
  12 -15   0   20.40   35.50
  15  13   0  -82.99   33.40
 -13  15   0  -55.59   24.70
 -15 -13   0  -36.20   33.00
 -15 -13   0  -33.40   39.50
  15  13   0   36.90   35.90
  13 -15   0   -5.80   39.40
  13 -15   0   26.80   37.50
 -15 -14   0   -9.40   35.80
  15  14   0  -37.50   51.19
  14 -15   0   11.20   35.70
  15  14   0   26.70   37.40
 -14  15   0   11.00   30.40
  14 -15   0  -83.59   33.60
 -15 -14   0  -13.70   38.10
  15 -15   0   24.70   42.00
  15  15   0  -46.20   35.60
  15  15   0  -98.79   35.80
 -15 -15   0  -99.29   39.40
 -15  15   0  -55.39   26.50
 -15 -15   0   -1.50   40.10
 -15  15   0  -12.10   28.50
  16 -15   0    5.60   46.90
 -16  15   0  -76.89   28.60
  15  16   0   -3.30   39.40
 -15 -16   0  -80.69   36.00
  16 -15   0  -95.69   38.30
 -16  14   0   22.20   29.30
  14  16   0    9.80   38.70
 -14 -16   0  -90.29   36.00
  16 -14   0    9.90   73.39
  14  16   0  -45.60   38.60
  16 -14   0  -81.79   36.50
 -16  14   0   14.20   33.60
 -14 -16   0  -99.39   38.40
 -13 -16   0  -26.40   35.90
 -16  13   0   14.70   33.40
  16 -13   0  -36.80   33.50
 -13 -16   0  -17.80   30.40
  16 -13   0   -4.70   39.00
  13  16   0  -45.00   36.50
 -16  13   0   24.50   29.80
  13  16   0    2.10   36.70
 -12 -16   0  -44.20   38.20
  16 -12   0    0.30   34.70
  12  16   0   50.69   40.00
  12  16   0   62.29   37.60
 -12 -16   0  -55.49   35.60
 -16  12   0   12.10   31.30
 -16  12   0   14.60   44.80
  16 -12   0   61.99   39.50
  16 -11   0   -4.00   36.20
 -11 -16   0  -54.99   32.70
 -16  11   0  -38.40   23.30
  11  16   0   -3.50   29.90
  11  16   0   27.90   37.90
 -16  11   0  -36.00   23.20
 -11 -16   0  -80.69   33.50
  16 -11   0   45.90   41.40
 -16  10   0  -57.99   21.50
 -10 -16   0  -42.30   36.80
  16 -10   0  -44.80   31.80
  10  16   0   15.50   34.00
 -16  10   0    4.10   30.20
  16 -10   0   35.50   37.30
 -10 -16   0  -20.00   32.10
  10  16   0   44.00   34.60
  -9 -16   0   25.80   36.00
  16  -9   0   -0.40   36.50
  -9 -16   0   10.80   39.20
   9  16   0  -10.10   29.60
 -16   9   0   39.50   29.70
 -16   9   0   47.90   26.50
   9  16   0   -4.90   29.20
  16  -9   0   -1.30   33.90
  -8 -16   0  -54.69   31.40
  16  -8   0   38.10   32.70
   8  16   0   -7.60   44.20
  16  -8   0   -8.20   31.60
  -8 -16   0   -5.50   29.80
 -16   8   0    1.50   21.70
   7  16   0   -8.00   29.30
   7  16   0   27.70   29.80
 -16   7   0   -1.60   21.60
  -7 -16   0  -44.00   25.60
  16  -7   0   24.80   29.60
  -7 -16   0   40.80   35.30
 -16   7   0    4.60   25.40
  16  -7   0   34.80   32.40
  -6 -16   0   44.20   34.20
  16  -6   0  -21.40   22.40
  -6 -16   0  -17.00   32.30
 -16   6   0    8.60   23.10
  16  -6   0   51.19   34.30
   6  16   0   12.40   28.10
 -16   6   0  -35.20   22.30
   6  16   0   23.80   28.80
 -16   5   0  -19.60   23.20
   5  16   0   -6.20   25.50
  16  -5   0  -58.69   36.00
  16  -5   0    5.10   31.30
   5  16   0   22.70   28.30
 -16   5   0   40.30   25.00
  -5 -16   0   67.69   35.50
  -5 -16   0  -73.69   28.00
  16  -4   0   -9.60   29.20
   4  16   0   10.30   28.20
 -16   4   0  -14.50   23.90
   4  16   0  -51.79   24.10
  -4 -16   0   42.00   48.60
 -16   4   0    7.70   20.00
  16  -4   0   -0.60   36.90
  -4 -16   0   27.90   32.40
   3  16   0   49.20   30.10
 -16   3   0   58.49   29.80
  16  -3   0   50.79   36.30
  16  -3   0   53.19   30.80
  -3 -16   0  102.89   51.89
   3  16   0   53.39   32.40
 -16   3   0   45.80   26.10
  -3 -16   0   52.79   32.60
   2  16   0  -10.00   22.90
 -16   2   0   31.40   27.70
  -2 -16   0  -24.40   36.40
  16  -2   0   11.40   34.60
  -2 -16   0  -41.70   23.50
   2  16   0   24.70   30.10
  16  -2   0    3.10   27.30
 -16   1   0   14.90   26.20
  16  -1   0  -11.00   28.70
  16  -1   0    4.00   31.80
   1  16   0   16.60   26.30
  -1 -16   0   25.70   30.60
 -16   1   0   19.70   28.70
   1  16   0   -1.40   28.60
   0  16   0  306.17   50.19
   0  16   0  242.38   44.90
  16   0   0  253.47   47.70
 -16   0   0  220.68   42.00
 -16   0   0  315.67   48.90
   0 -16   0  236.98   43.60
  16   0   0  331.87   49.90
  16   1   0    9.90   27.70
  -1  16   0  -25.50   21.70
  -1  16   0  -40.80   24.20
  16   1   0   17.70   33.40
   1 -16   0  -25.60   27.30
   1 -16   0   42.40   38.40
 -16  -1   0   44.40   27.60
 -16  -1   0   11.20   25.50
   2 -16   0  -22.50   26.00
  -2  16   0   -1.20   23.60
  16   2   0    8.10   32.50
   2 -16   0    6.60   39.10
 -16  -2   0  -28.20   25.30
  16   2   0   -9.00   26.90
  -2  16   0  -23.30   27.60
 -16  -2   0   33.70   28.70
 -16  -3   0    4.40   28.50
  -3  16   0   12.00   24.90
  16   3   0    9.70   27.50
 -16  -3   0   19.60   28.00
   3 -16   0   63.39   35.90
  16   3   0   35.50   35.30
  -3  16   0   43.10   33.20
   3 -16   0   83.69   48.60
   4 -16   0  -38.90   35.20
 -16  -4   0   55.69   31.60
 -16  -4   0   -4.90   27.00
   4 -16   0  -39.00   26.60
  16   4   0  -27.80   25.90
  16   4   0    2.90   31.30
  -4  16   0  -34.00   24.30
  -4  16   0    5.70   25.90
 -16  -5   0   -2.10   30.30
  -5  16   0   17.20   27.00
   5 -16   0  -44.10   30.50
  16   5   0   -4.30   31.10
 -16  -5   0   19.50   29.50
  -5  16   0   -6.00   28.30
   5 -16   0  -40.50   28.20
  16   5   0  -55.59   26.90
   6 -16   0  -18.80   32.00
  -6  16   0   -7.30   24.70
  16   6   0   -5.90   27.00
   6 -16   0   21.80   32.80
  -6  16   0  -11.20   28.40
 -16  -6   0   57.09   31.90
  16   6   0   36.70   44.30
   7 -16   0  -27.80   28.90
 -16  -7   0  -26.30   26.70
  16   7   0   19.10   37.30
  -7  16   0  -19.50   26.60
 -16  -7   0   -2.00   33.10
  16   7   0   46.10   32.90
   7 -16   0   43.60   34.90
  -7  16   0  -10.40   26.10
  -8  16   0    6.90   30.60
  16   8   0   10.30   33.50
   8 -16   0  -25.00   33.80
  -8  16   0   -1.60   29.80
  16   8   0  -23.20   27.40
   8 -16   0  -33.60   30.40
 -16  -8   0   25.30   33.30
 -16  -8   0    1.40   28.00
   9 -16   0   60.99   39.20
  -9  16   0  -32.80   31.00
  16   9   0  -26.00   29.30
 -16  -9   0   29.50   33.90
  -9  16   0   22.50   31.10
   9 -16   0   -2.40   33.60
  16   9   0  -33.00   30.80
 -16  -9   0  -12.50   30.70
 -16 -10   0   70.19   35.30
  10 -16   0    8.70   35.60
  16  10   0   43.60   34.00
 -16 -10   0   -3.00   37.60
  10 -16   0   46.80   42.00
  16  10   0  -63.39   29.80
 -10  16   0  -59.89   28.90
 -10  16   0   20.00   29.00
 -11  16   0   -2.70   35.30
  11 -16   0  -51.69   35.30
 -16 -11   0  -32.00   32.90
  11 -16   0   72.09   44.00
 -11  16   0   24.50   27.50
  16  11   0  -64.89   32.70
  16  11   0  -13.40   34.20
 -16 -11   0   34.80   36.90
  16  12   0   -2.90   36.80
  12 -16   0  -51.69   30.90
  16  12   0  -66.89   32.70
  12 -16   0  -73.69   33.20
 -16 -12   0  -36.80   39.40
 -16 -12   0  -88.49   31.70
 -12  16   0   30.90   33.50
  13 -16   0   39.10   41.70
 -16 -13   0  -54.29   33.20
  13 -16   0    0.60   40.40
  16  13   0  -65.29   32.80
  16  13   0  -58.29   42.70
 -13  16   0   -5.40   28.00
 -16 -13   0  -28.20   38.70
  14 -16   0  -90.69   36.40
 -16 -14   0  -24.70   42.30
  16  14   0  -48.80   38.00
  14 -16   0   31.70   72.09
  16  14   0   29.40   41.20
 -14  16   0  -15.50   30.70
 -16 -14   0  -72.69   36.30
  16  15   0  -59.49   41.60
  15 -16   0  -30.50   46.00
 -16 -15   0   15.50   41.00
  16  15   0  -33.20   35.60
 -15  16   0  -32.30   33.50
  16 -16   0  -54.49   48.50
  16 -16   0  -98.19   65.99
  17 -15   0  -81.39   48.70
  17 -14   0  -14.50   41.50
 -17  14   0    6.20   35.70
  14  17   0  -52.69   34.80
  17 -14   0  -63.79   45.80
 -14 -17   0  -22.40   38.00
 -14 -17   0  -51.39   41.10
  17 -13   0   12.50   42.80
 -17  13   0  -53.39   30.80
  13  17   0  -20.40   35.20
 -17  13   0  -59.29   23.00
 -13 -17   0  -77.49   40.00
 -13 -17   0   41.80   49.30
  13  17   0  -46.40   37.50
  17 -13   0   30.80   46.40
 -17  12   0  -36.60   28.30
  17 -12   0  -22.10   33.60
  12  17   0  -32.80   36.80
 -17  12   0  -31.60   29.40
  12  17   0  -58.79   34.40
 -12 -17   0  -79.49   33.10
  17 -12   0  -18.90   36.70
 -12 -17   0  -68.69   44.60
 -11 -17   0  -20.70   33.50
  11  17   0  -55.69   28.90
 -11 -17   0  -66.29   36.70
  17 -11   0  -61.19   31.30
  17 -11   0  -24.10   36.00
 -17  11   0   22.30   33.70
  10  17   0    2.20   33.70
 -10 -17   0   -7.40   33.70
  17 -10   0  -41.40   34.50
  17 -10   0  -22.10   32.90
 -17  10   0  -13.90   20.60
 -17  10   0    6.70   31.90
 -10 -17   0   26.60   38.20
  10  17   0  -48.50   31.00
  -9 -17   0  -35.80   32.40
   9  17   0  -60.89   31.10
  17  -9   0  -23.70   35.30
  17  -9   0  -39.00   31.00
  -9 -17   0  -15.40   36.70
 -17   9   0   15.20   24.90
 -17   9   0  -14.70   27.00
   9  17   0   61.29   33.50
  17  -8   0   17.50   35.00
  -8 -17   0   43.10   36.60
   8  17   0  -33.30   28.10
  17  -8   0    8.00   32.00
 -17   8   0  -28.00   18.60
   8  17   0   33.60   34.60
  -8 -17   0   -3.70   35.40
 -17   8   0  -14.50   25.60
 -17   7   0    5.00   22.80
 -17   7   0   17.30   28.20
   7  17   0   -1.90   29.70
  17  -7   0   26.20   36.10
  -7 -17   0   20.40   35.70
  -7 -17   0   -9.20   37.40
  17  -7   0  -11.20   28.40
   7  17   0   16.90   32.80
 -17   6   0    2.90   32.50
  17  -6   0   27.10   35.00
   6  17   0  -55.29   32.10
 -17   6   0    6.00   22.00
   6  17   0  -14.50   30.70
  -6 -17   0   10.90   37.30
  17  -6   0  -65.39   33.80
  -6 -17   0   -9.60   31.20
  17  -5   0    1.90   38.70
 -17   5   0    5.20   21.20
  -5 -17   0    2.50   33.40
  17  -5   0  -13.50   32.10
  -5 -17   0  -31.90   30.40
   5  17   0   -6.60   30.60
   5  17   0   10.00   31.80
 -17   4   0   19.10   27.80
  17  -4   0    1.00   30.40
   4  17   0   38.90   33.30
  -4 -17   0   62.79   36.70
  17  -4   0   61.29   35.60
 -17   4   0   49.80   24.50
   4  17   0  -39.20   29.50
  -4 -17   0   45.60   30.80
   3  17   0  -10.30   30.50
 -17   3   0   33.40   27.00
  17  -3   0  -38.70   31.60
  -3 -17   0  -23.80   29.20
  17  -3   0   -2.00   29.20
   3  17   0  -31.50   22.20
  -3 -17   0  -34.70   31.30
 -17   3   0    9.20   25.50
  17  -2   0   53.99   30.50
 -17   2   0   18.10   24.60
   2  17   0   31.90   29.50
  17  -2   0    3.30   32.40
   2  17   0   28.00   30.20
 -17   2   0   24.30   29.20
  -2 -17   0   68.89   35.40
  17  -1   0    1.20   26.10
   1  17   0   25.40   29.20
  17  -1   0   12.00   33.90
   1  17   0  -24.60   25.10
 -17   1   0   -8.60   25.40
  -1 -17   0  -19.20   30.40
 -17   1   0   37.80   29.50
   0  17   0   15.20   29.70
  17   0   0    5.40   40.30
   0  17   0   66.49   33.00
   0 -17   0   22.90   32.60
 -17   0   0   56.09   31.20
   0 -17   0   50.99   35.20
 -17   0   0  -20.40   27.30
  17   0   0   -5.20   26.60
 -17  -1   0   13.30   31.00
  -1  17   0   32.10   30.60
  17   1   0    9.10   29.40
  17   1   0   13.20   41.40
  -1  17   0   -9.50   27.90
   1 -17   0  -10.90   29.10
   1 -17   0  -51.59   28.40
 -17  -1   0   72.49   33.50
  -2  17   0   48.30   30.30
  17   2   0   28.90   38.10
 -17  -2   0   19.60   29.00
   2 -17   0   -0.50   31.60
  -2  17   0    6.20   31.30
  17   2   0   35.30   31.70
   2 -17   0  -21.10   28.40
 -17  -2   0   19.30   29.70
  17   3   0   29.00   33.00
   3 -17   0   23.60   36.20
   3 -17   0   72.09   35.40
  17   3   0  -48.60   32.70
 -17  -3   0    4.50   31.40
  -3  17   0   23.00   31.20
 -17  -3   0    7.80   37.70
  -3  17   0   40.50   28.30
  17   4   0   32.20   34.00
 -17  -4   0  -22.20   34.30
  -4  17   0  -51.79   26.20
   4 -17   0   31.80   32.40
 -17  -4   0   51.79   34.20
  -4  17   0   29.20   29.90
  17   4   0   62.99   33.20
   4 -17   0  -22.50   30.20
  17   5   0   38.50   30.90
   5 -17   0  -19.70   32.60
  17   5   0  -22.40   29.60
  -5  17   0   33.20   30.80
 -17  -5   0   47.00   31.80
   5 -17   0    8.30   32.20
 -17  -5   0   35.70   33.20
  -5  17   0    6.20   28.70
 -17  -6   0   20.50   30.60
   6 -17   0  -11.80   27.40
  17   6   0  -11.00   29.40
  17   6   0  -47.70   28.00
   6 -17   0  -33.20   31.90
  -6  17   0   10.30   38.10
 -17  -6   0  -30.10   27.30
  -6  17   0   -8.90   30.70
  17   7   0   38.60   33.50
 -17  -7   0   26.80   31.70
  17   7   0   90.59   40.50
  -7  17   0  -11.40   34.60
  -7  17   0   36.20   33.20
   7 -17   0   79.29   40.90
 -17  -7   0   29.70   35.70
   7 -17   0   79.19   38.80
  17   8   0   43.40   33.50
  -8  17   0   17.60   29.80
  17   8   0  -40.60   31.00
   8 -17   0   40.90   37.10
 -17  -8   0  -34.40   28.10
 -17  -8   0   46.30   34.30
  -8  17   0  -65.19   28.50
   8 -17   0   44.00   38.20
 -17  -9   0   91.19   37.70
 -17  -9   0  -56.29   31.70
  -9  17   0   56.29   30.40
  17   9   0   17.90   34.00
   9 -17   0   37.10   40.00
   9 -17   0   34.40   40.20
  17   9   0   38.00   34.20
 -10  17   0   62.59   34.80
  10 -17   0   -8.60   39.00
  17  10   0  -36.40   34.10
  17  10   0   35.80   36.40
 -17 -10   0   21.50   38.60
  10 -17   0   -1.10   39.40
 -17 -10   0   59.29   40.10
 -10  17   0  -44.50   32.20
  11 -17   0   24.40   39.40
  17  11   0   29.70   38.20
  17  11   0  -44.60   35.50
 -17 -11   0  -49.99   35.90
 -17 -11   0  -12.70   36.90
 -11  17   0  -60.79   24.80
  11 -17   0   49.40   39.60
 -11  17   0  -91.29   32.50
  17  12   0   -6.40   36.80
  17  12   0  -64.89   31.30
  12 -17   0  -52.99   38.20
  12 -17   0  -96.49   34.00
 -12  17   0   45.60   34.30
  17  13   0  -49.10   44.60
  17  13   0  -54.69   34.20
  13 -17   0   29.30   44.50
 -17 -13   0  -84.79   32.40
 -17 -13   0   68.79   41.60
 -13  17   0  -34.80   35.10
  13 -17   0   62.79   48.00
 -13  17   0   -9.30   29.10
  17  14   0  -27.50   45.50
  14 -17   0  -57.39   42.50
 -17 -14   0  -11.30   40.70
  14 -17   0  -50.59   47.90
  17  14   0   30.80   41.70
 -14  17   0   35.00   37.30
  15 -17   0 -110.99   46.50
  18 -14   0  -16.80   63.79
  18 -13   0   40.00   42.70
  13  18   0  -86.29   43.60
  18 -13   0  -94.59   38.40
 -13 -18   0  -79.89   39.70
 -13 -18   0   24.30   47.40
  18 -12   0   32.50   43.90
 -18  12   0  -47.20   26.60
 -12 -18   0  -14.30   41.20
 -12 -18   0  -43.30   38.50
  12  18   0  -34.40   39.90
 -18  12   0  -45.90   31.60
  12  18   0  -90.09   32.20
 -18  11   0   57.09   39.10
 -18  11   0  -15.50   30.70
 -11 -18   0   16.90   71.79
  11  18   0  -15.50   36.80
  18 -11   0  111.49   42.50
  11  18   0  -33.20   37.30
 -18  10   0   15.70   26.30
 -18  10   0   -7.30   30.00
  18 -10   0    5.40   37.70
  18 -10   0   13.50   34.40
 -10 -18   0  -21.30   30.60
 -10 -18   0   43.90   39.20
  10  18   0  -30.90   31.60
  10  18   0   -4.00   35.50
  -9 -18   0  -14.20   38.40
  18  -9   0  -25.20   28.90
   9  18   0   33.90   38.60
  18  -9   0  -38.10   35.00
  -9 -18   0  -36.70   30.80
   9  18   0  -41.40   53.89
 -18   9   0  -29.20   30.00
 -18   8   0    7.00   22.60
  -8 -18   0  -46.20   36.00
  -8 -18   0   11.50   37.30
  18  -8   0  -49.99   29.90
  18  -8   0   -1.80   36.70
 -18   8   0  -45.80   24.90
   8  18   0  -15.50   32.10
   8  18   0   41.50   34.60
  -7 -18   0    2.00   36.60
  18  -7   0  -16.90   39.70
  18  -7   0  -26.20   34.80
  -7 -18   0  -41.70   36.00
 -18   7   0   31.50   29.00
   7  18   0  -50.19   26.20
   7  18   0   12.50   36.20
 -18   7   0  -28.20   27.30
  -6 -18   0   13.30   36.70
  18  -6   0   -8.10   36.70
  18  -6   0  -43.40   31.80
   6  18   0    2.50   31.10
   6  18   0  -35.80   30.00
  -6 -18   0   26.80   38.30
 -18   6   0  -11.80   29.20
 -18   6   0   -3.20   23.90
 -18   5   0   29.40   29.90
 -18   5   0   -2.20   22.30
  -5 -18   0   31.90   32.90
   5  18   0   -1.60   27.30
  18  -5   0    8.90   34.70
  18  -5   0   60.79   41.90
  -5 -18   0  -16.10   35.60
  18  -4   0    6.80   38.80
 -18   4   0  -27.80   21.30
   4  18   0  -22.10   29.00
  -4 -18   0    1.90   36.10
  -4 -18   0   48.40   38.10
  18  -4   0    3.60   34.30
 -18   4   0   12.70   27.20
   4  18   0  -26.00   30.40
  -3 -18   0  -62.69   32.80
 -18   3   0   85.19   36.00
 -18   3   0    0.00   22.50
  18  -3   0    3.70   31.50
   3  18   0   30.60   34.70
  -3 -18   0   -1.60   33.30
   3  18   0   32.40   31.10
  18  -3   0  -17.60   34.80
  18  -2   0   26.20   35.50
   2  18   0   65.59   37.00
  18  -2   0   44.20   33.20
   2  18   0   53.09   54.39
  -2 -18   0   52.69   33.50
 -18   2   0   15.70   20.40
 -18   2   0   26.40   29.40
  18  -1   0   -1.00   32.50
  -1 -18   0  -12.90   30.50
   1  18   0   44.00   34.90
 -18   1   0   50.39   31.60
  18  -1   0   49.40   37.50
 -18   1   0   75.39   35.40
   0  18   0   57.09   47.70
   0 -18   0   60.69   34.70
   0  18   0   20.50   32.00
 -18   0   0   31.30   29.20
  18   0   0    5.20   34.80
  18   0   0    7.50   34.20
 -18   0   0   29.90   30.20
   0 -18   0   87.89   38.90
 -18  -1   0    8.60   30.30
 -18  -1   0    2.50   28.00
  18   1   0   26.90   34.70
  18   1   0    9.40   35.00
   1 -18   0   17.90   36.50
  -1  18   0  -12.60   29.90
   1 -18   0   15.50   31.40
  -1  18   0   22.00   42.60
  18   2   0    2.60   39.60
 -18  -2   0    7.70   28.10
   2 -18   0   76.09   37.40
  18   2   0  121.59   39.40
  -2  18   0   22.70   32.90
   2 -18   0   35.70   36.70
 -18  -2   0   52.79   34.20
 -18  -3   0    3.80   32.70
 -18  -3   0    7.60   26.80
  -3  18   0    2.70   38.80
  -3  18   0  -68.79   29.80
  18   3   0    0.00   35.00
  18   3   0   15.70   31.90
   3 -18   0  -27.50   32.90
   3 -18   0   -8.40   31.10
  18   4   0   49.70   37.90
 -18  -4   0   -1.60   32.20
 -18  -4   0   -4.80   30.00
   4 -18   0  -15.90   35.20
  18   4   0   -3.90   34.00
   4 -18   0   21.50   34.30
  -4  18   0   28.50   29.90
 -18  -5   0   16.10   34.50
  18   5   0  -45.30   30.10
   5 -18   0  -22.60   34.30
  -5  18   0  -18.60   27.90
 -18  -5   0    9.40   29.40
   5 -18   0  -11.20   35.60
  18   5   0   44.00   36.30
  18   6   0    6.50   33.10
  -6  18   0   53.19   31.60
 -18  -6   0    8.90   31.70
  -6  18   0   51.69   37.00
   6 -18   0  -41.60   32.30
  18   6   0  -22.10   30.30
   6 -18   0  -31.10   34.80
 -18  -6   0  -47.00   29.10
  -7  18   0   -5.70   25.50
   7 -18   0   68.49   39.60
   7 -18   0   31.60   36.70
  18   7   0  -51.89   31.40
  -7  18   0  -55.89   33.50
  18   7   0   43.50   34.50
 -18  -7   0  -21.70   31.90
 -18  -7   0   34.90   34.10
  -8  18   0   24.80   31.50
 -18  -8   0   36.50   38.20
  -8  18   0  -35.70   34.50
   8 -18   0  -10.50   36.80
 -18  -8   0   36.40   34.30
  18   8   0  -47.60   31.00
   8 -18   0  -29.80   34.90
  18   8   0   70.99   36.40
   9 -18   0  -56.09   34.90
  -9  18   0   27.60   50.59
  18   9   0  -47.40   33.00
 -18  -9   0  -14.60   35.50
  18   9   0   39.60   39.50
 -18  -9   0   -9.00   36.10
   9 -18   0   -6.60   36.00
  -9  18   0  -30.20   28.20
  10 -18   0  -16.10   36.30
  10 -18   0  -58.89   34.80
  18  10   0   -7.40   46.70
 -10  18   0   77.19   36.20
  18  10   0   63.09   39.60
 -18 -10   0   10.50   47.00
 -18 -10   0   26.40   38.30
 -10  18   0  -76.49   35.90
 -11  18   0   13.70   31.50
  11 -18   0   58.19   42.40
  11 -18   0    7.10   49.20
 -11  18   0  -50.19   36.10
  18  11   0    6.30   34.50
 -18 -11   0  -21.00   40.20
  18  11   0  -68.39   36.80
 -18 -11   0   17.50   40.30
  18  12   0  -59.69   40.80
  12 -18   0  -70.09   38.40
  12 -18   0  -18.10   42.70
 -12  18   0   15.50   35.00
 -12  18   0  -46.50   42.30
  18  12   0   40.50   41.80
 -18 -12   0 -100.79   37.60
 -18 -13   0  -67.19   39.10
  18  13   0  -53.49   37.70
  13 -18   0  -12.70   45.90
  13 -18   0   58.59   59.29
 -18 -13   0   23.10   45.30
 -12 -19   0  -62.69   43.90
  19 -12   0   90.09   50.29
  11  19   0   -2.90   38.70
  19 -11   0  -67.09   30.50
 -11 -19   0  -22.70   39.50
  19 -11   0  -85.49   44.20
 -11 -19   0 -101.79   37.40
  19 -10   0   -3.00   43.60
  10  19   0   28.90   38.30
  10  19   0  -11.70   42.20
 -19  10   0  -13.20   33.10
  19 -10   0  -54.89   31.10
 -10 -19   0   36.20   46.40
 -19  10   0  -24.10   25.00
 -10 -19   0   57.69   45.40
  -9 -19   0  -25.50   40.10
  19  -9   0   34.60   30.00
   9  19   0  -73.89   30.90
 -19   9   0  -17.30   27.00
 -19   9   0   35.00   32.60
  19  -8   0   21.10   34.70
 -19   8   0  -65.59   27.80
  -8 -19   0  -43.10   36.20
  19  -8   0   39.50   43.20
   8  19   0  -71.19   29.00
 -19   8   0   -6.20   24.30
  -8 -19   0   46.50   36.90
  19  -7   0  -55.89   36.50
  -7 -19   0  -29.00   36.20
  19  -7   0   -6.20   41.70
  -7 -19   0  -44.10   33.80
   7  19   0  -45.40   29.40
 -19   7   0  -12.00   31.30
   7  19   0  155.08   76.49
   6  19   0    6.20   35.70
 -19   6   0   26.40   31.40
  19  -6   0  -29.60   36.80
   6  19   0  101.09   41.10
  19  -6   0  -25.40   37.40
  -6 -19   0   -5.70   34.90
  -6 -19   0  -78.49   32.40
 -19   6   0   46.20   27.30
   5  19   0  -12.30   30.80
  -5 -19   0  -32.00   32.70
  19  -5   0  -30.70   36.90
 -19   5   0  -14.50   26.80
   5  19   0  -13.60   32.30
  19  -5   0  125.99   46.40
 -19   5   0   66.09   32.80
  -5 -19   0    4.90   37.00
 -19   4   0  -41.60   25.90
  -4 -19   0   13.60   39.70
   4  19   0  -26.20   26.40
 -19   4   0   10.30   29.30
  19  -4   0   -4.00   35.80
  19  -4   0  -76.09   30.00
   4  19   0  -25.00   33.00
  -4 -19   0  -58.39   31.30
 -19   3   0  -24.60   22.20
  -3 -19   0   22.10   34.70
  19  -3   0   15.10   35.20
   3  19   0   -7.40   28.90
  19  -3   0   18.40   40.10
 -19   3   0  -41.30   25.90
   3  19   0  -67.59   29.50
 -19   2   0  -37.80   24.60
  -2 -19   0   22.10   38.30
   2  19   0  -58.79   29.50
  19  -2   0    9.00   34.40
  19  -2   0   -7.50   35.40
   2  19   0  -19.30   28.10
 -19   2   0  -36.10   23.00
  19  -1   0   41.60   39.50
 -19   1   0  -30.40   31.00
  -1 -19   0  -24.20   33.60
 -19   1   0   -6.50   29.70
   1  19   0  -62.09   29.80
   1  19   0    2.80   32.30
  19  -1   0   14.00   32.70
   0 -19   0  -32.70   33.50
   0 -19   0  -68.29   30.70
 -19   0   0  -21.20   31.80
  19   0   0  -17.70   33.70
  19   0   0   16.30   36.70
   0  19   0  -42.40   26.50
 -19   0   0   14.90   30.20
   0  19   0  133.99   44.00
   1 -19   0   -8.80   34.60
  -1  19   0  -45.50   26.00
  19   1   0  -49.80   26.50
   1 -19   0  -15.20   34.00
  -1  19   0  -38.30   31.60
 -19  -1   0    2.90   30.10
 -19  -1   0  -17.20   31.10
  19   1   0   17.20   37.20
 -19  -2   0  -20.40   26.70
  19   2   0  -62.99   27.90
   2 -19   0   39.10   41.50
  -2  19   0    9.70   28.80
  19   2   0  -31.90   33.20
  -2  19   0  -48.30   29.60
   2 -19   0  -21.20   33.40
 -19  -2   0   55.19   38.10
   3 -19   0   -5.60   37.90
   3 -19   0  -20.70   32.20
  19   3   0  -40.40   32.10
 -19  -3   0    7.40   31.50
  -3  19   0  -43.00   31.80
 -19  -3   0  -18.10   29.80
  -3  19   0   10.80   28.60
  19   4   0   27.10   34.00
  -4  19   0   21.20   27.60
  -4  19   0  -45.70   31.60
   4 -19   0    4.20   39.50
  19   4   0  -47.20   32.70
 -19  -4   0  -54.49   29.10
   4 -19   0   -1.40   36.10
 -19  -4   0  -12.80   31.10
 -19  -5   0   61.99   41.70
   5 -19   0   80.69   41.40
  -5  19   0   33.30   31.40
  19   5   0    1.50   39.30
 -19  -5   0   67.09   37.80
   5 -19   0   -8.00   38.30
  19   5   0   46.00   36.90
  -5  19   0   -1.60   33.30
  -6  19   0   21.20   33.20
   6 -19   0   69.39   36.70
  19   6   0   52.09   39.60
  19   6   0  -73.49   34.80
  -6  19   0   90.69   64.09
 -19  -6   0  -21.20   37.40
   6 -19   0  -78.89   29.40
 -19  -6   0   78.19   38.20
 -19  -7   0  -85.99   31.60
  19   7   0  -14.20   32.80
  -7  19   0    1.10   32.30
  -7  19   0   49.80   41.60
   7 -19   0  -46.40   31.10
  19   7   0  -94.39   32.50
   7 -19   0   62.89   42.90
 -19  -7   0  -16.00   37.10
 -19  -8   0   -8.80   33.00
   8 -19   0   25.50   39.50
  19   8   0  -82.89   53.89
  -8  19   0   66.89   37.50
  19   8   0  -13.00   35.10
   8 -19   0   12.80   36.90
  -8  19   0 -100.69   36.10
   9 -19   0    0.70   44.60
 -19  -9   0    3.90   39.00
   9 -19   0  -87.29   34.00
  19   9   0   21.60   38.00
  -9  19   0   35.00   32.00
  19   9   0   -2.70   35.90
  19  10   0  -35.50   41.30
  19  10   0   50.89   40.60
 -19 -10   0    3.60   42.00
 -19 -10   0   29.80   40.90
  10 -19   0  -40.00   41.30
 -10  19   0  -14.40   34.20
  10 -19   0   24.30   49.10
 -19 -11   0   26.70   42.20
  19  11   0  -38.60   41.70
  19  11   0  -34.80   39.50
  11 -19   0  -27.20   42.50
 -11  19   0    7.90   34.40
 -19 -11   0 -104.29   38.20
  12 -19   0  -48.30   42.50
 -19 -12   0  -49.70   62.89
 -10 -20   0   69.09   47.00
  20 -10   0  -69.99   41.60
 -10 -20   0 -124.19   44.70
  20 -10   0  -82.59   48.20
   9  20   0  -41.10   30.90
 -20   9   0  -41.10   31.40
  -9 -20   0 -105.49   39.20
  20  -9   0   11.90   44.80
  20  -9   0 -112.49   40.60
  -8 -20   0  -70.39   38.50
  -8 -20   0    6.90   41.30
  20  -8   0   25.40   41.90
 -20   8   0  -52.19   24.10
 -20   8   0  -57.59   31.50
   8  20   0  -16.60   33.20
   7  20   0   49.70   40.50
  20  -7   0    6.50   43.50
  -7 -20   0  -46.00   35.50
 -20   7   0  -33.00   25.40
 -20   7   0   19.90   35.10
  20  -7   0  -66.09   50.19
   7  20   0   30.60   38.70
  -6 -20   0   -1.20   37.40
  20  -6   0   34.20   37.20
 -20   6   0   10.70   29.20
   6  20   0   27.50   43.80
  20  -6   0   60.29   54.29
   6  20   0  -23.90   34.00
 -20   6   0   94.29   37.80
  -6 -20   0   89.39   44.80
   5  20   0   -9.00   32.60
  -5 -20   0   53.19   37.70
   5  20   0  -30.00   35.00
 -20   5   0   -0.80   30.60
  20  -5   0  -33.90   36.20
 -20   5   0   -8.30   26.00
  20  -5   0  -16.90   35.50
  -5 -20   0   -8.90   38.70
  20  -4   0  -30.00   39.60
  -4 -20   0   11.80   34.40
   4  20   0  -19.70   36.30
 -20   4   0  -10.80   31.70
  20  -4   0  -55.59   34.10
   4  20   0    1.50   31.50
 -20   4   0  -39.80   34.10
   3  20   0  -40.80   48.70
 -20   3   0   -0.80   47.90
   3  20   0  -31.00   30.90
 -20   3   0    1.00   33.20
  -3 -20   0   -7.30   35.90
  20  -3   0   12.60   46.20
  20  -3   0   33.10   40.30
  20  -2   0   11.20   39.50
   2  20   0  -21.50   32.40
  -2 -20   0  -10.50   32.80
 -20   2   0   27.90   35.20
  20  -2   0   -3.70   40.60
 -20   2   0   31.50   28.70
 -20   1   0   26.80   31.00
   1  20   0  -30.40   33.20
  20  -1   0    4.40   35.40
  -1 -20   0   55.19   36.50
  -1 -20   0  -56.49   28.90
  20  -1   0  -49.50   39.20
   1  20   0  -36.00   60.29
 -20   1   0  -29.10   22.90
   0 -20   0  -43.90   30.50
 -20   0   0  -29.20   32.50
  20   0   0    2.30   42.60
  20   0   0   16.30   40.50
   0  20   0    0.80   36.60
 -20   0   0   38.00   31.50
   0 -20   0   26.20   35.00
  -1  20   0   -2.90   33.10
  20   1   0    0.30   35.10
 -20  -1   0   -5.20   30.50
   1 -20   0   -6.90   33.80
  20   1   0  -73.19   37.50
 -20  -1   0  -19.70   34.00
   1 -20   0   -9.00   34.00
 -20  -2   0  -14.60   30.30
   2 -20   0   12.80   34.30
  -2  20   0   48.20   37.30
 -20  -2   0  -67.89   31.90
   2 -20   0   29.80   37.10
  20   2   0    3.00   38.90
  20   2   0  -32.10   39.00
  20   3   0  -68.19   35.50
   3 -20   0  -61.89   31.00
 -20  -3   0   32.90   41.80
  -3  20   0   17.60   30.90
 -20  -3   0  -16.10   30.90
  -3  20   0  -10.10   40.20
   3 -20   0  -44.40   36.50
   4 -20   0   89.09   39.20
 -20  -4   0  -14.70   34.00
   4 -20   0    9.50   36.20
  20   4   0   11.90   39.80
  -4  20   0  -46.50   33.50
 -20  -4   0  -14.60   38.10
  -4  20   0   66.89   35.80
  -5  20   0   -9.10   30.00
 -20  -5   0   -6.80   35.80
   5 -20   0    0.90   39.80
  -5  20   0  -34.10   39.60
  20   5   0  -33.80   34.80
   5 -20   0   18.90   38.70
  20   6   0   64.19   41.90
 -20  -6   0   68.19   39.30
  20   6   0    2.70   35.10
 -20  -6   0    0.10   35.20
  -6  20   0  -24.80   40.60
   6 -20   0   86.59   46.10
  -6  20   0   67.59   37.00
   6 -20   0   73.59   38.30
 -20  -7   0   13.00   37.40
   7 -20   0   41.80   38.60
   7 -20   0   25.90   66.79
  -7  20   0   21.60   34.80
 -20  -7   0  -31.00   39.10
  20   7   0  -18.50   37.70
  20   7   0  -32.20   36.00
  -7  20   0  -83.69   33.20
  20   8   0   61.19   43.70
  -8  20   0  -44.80   32.20
 -20  -8   0 -111.09   37.00
   8 -20   0  -16.70   40.80
 -20  -8   0  -36.70   31.90
   8 -20   0  -96.59   40.10
  -8  20   0   88.19   45.70
  20   8   0   -5.00   40.10
  -9  20   0  -73.59   28.90
  20   9   0   15.80   39.90
  20   9   0  -11.30   37.80
 -20  -9   0  -68.19   36.50
   9 -20   0  -69.79   43.70
 -20  -9   0  -74.79   39.90
  20  10   0   -8.60   47.80
 -20 -10   0   -4.60   48.80
  10 -20   0 -160.98   59.99
  10 -20   0   70.19   43.70
 -20 -10   0 -120.69   70.09
  11 -20   0  -47.10   61.29
  21  -8   0    9.80   45.10
  -8 -21   0   75.59   48.30
  21  -8   0  -92.59   48.10
  -8 -21   0  -44.30   54.89
   7  21   0  -87.39   35.00
  21  -7   0   95.09   50.29
  -7 -21   0   52.79   49.60
 -21   7   0   30.60   40.10
  21  -7   0  -27.00   44.90
  21  -6   0  -27.20   42.90
  21  -6   0  -97.89   39.30
 -21   6   0  -46.50   32.10
  -6 -21   0 -101.89   39.40
  -6 -21   0  -44.80   42.00
 -21   6   0  -21.40   31.80
   6  21   0 -104.49   64.79
  -5 -21   0   20.70   40.80
  21  -5   0  -43.10   40.90
   5  21   0  -22.00   32.00
   5  21   0  -87.39   34.10
 -21   5   0  -32.50   29.90
 -21   5   0  -96.09   31.70
  21  -5   0   44.90   47.70
  -5 -21   0   -5.40   42.00
  21  -4   0  -59.99   39.40
 -21   4   0  -49.80   28.00
 -21   4   0  -36.50   35.00
   4  21   0  -10.40   38.20
  -4 -21   0   41.70   44.10
   4  21   0  -54.19   30.70
  21  -4   0 -104.59   37.10
   3  21   0  -19.40   32.40
 -21   3   0   12.20   34.90
   3  21   0   47.70   36.00
  21  -3   0  -37.60   41.10
 -21   3   0  -12.80   24.40
 -21   2   0  -27.50   34.70
  -2 -21   0   16.80   37.10
  21  -2   0  -94.19   39.20
   2  21   0  -41.40   35.90
   2  21   0   27.00   35.80
  21  -2   0   23.30   51.79
  -2 -21   0  -40.40   65.49
 -21   2   0   -1.00   26.60
  -1 -21   0  -10.10   37.10
 -21   1   0  -22.00   35.80
 -21   1   0    8.20   26.00
   1  21   0  -62.99   36.90
   1  21   0   14.20   31.50
  21  -1   0  -50.39   45.30
  21  -1   0  -45.60   37.00
  -1 -21   0  -36.70   41.00
  21   0   0   -4.20   37.40
   0 -21   0  -50.79   38.90
  21   0   0  -16.60   56.19
 -21   0   0  -49.50   30.20
   0 -21   0  -19.30   33.90
 -21   0   0  -72.69   32.30
   1 -21   0  -50.29   32.40
 -21  -1   0  -61.29   34.00
   1 -21   0   -7.70   46.60
 -21  -1   0  -71.79   31.20
  21   1   0   68.09   45.90
  -1  21   0 -105.49   35.70
  21   2   0   16.70   41.40
  -2  21   0  -38.00   27.50
 -21  -2   0  -27.80   30.90
  -2  21   0  -35.00   37.30
 -21  -2   0  -55.89   34.90
   2 -21   0  -31.90   41.90
   2 -21   0  -78.59   33.50
  21   2   0  -62.79   40.00
  -3  21   0   -1.70   32.10
 -21  -3   0   71.69   33.60
  21   3   0  -94.59   38.70
  21   3   0  -19.10   42.40
   3 -21   0   22.90   37.50
   3 -21   0   48.60   68.39
 -21  -3   0  -18.50   39.90
  21   4   0  -13.00   39.60
 -21  -4   0  -55.79   39.20
 -21  -4   0   31.90   38.00
   4 -21   0   82.29   77.49
  -4  21   0   48.60   36.20
  -4  21   0  -81.59   33.70
   4 -21   0  139.89   47.30
  -5  21   0  -36.00   30.20
   5 -21   0    0.40   41.60
  21   5   0  -97.59   39.90
 -21  -5   0  -18.40   36.20
 -21  -5   0  -21.40   39.00
  21   5   0  -16.60   38.30
  -5  21   0   -8.80   40.70
   5 -21   0  -45.90   37.40
   6 -21   0  -45.10   41.80
  21   6   0   36.90   44.70
   6 -21   0  160.48   49.20
 -21  -6   0   -1.70   41.70
  21   6   0   37.30   47.60
  -6  21   0    1.00   33.20
 -21  -6   0   -1.60   36.20
 -21  -7   0   20.20   39.10
  21   7   0   11.70   42.50
   7 -21   0   35.30   49.20
 -21  -7   0   41.80   46.40
  -7  21   0    3.70   46.90
   7 -21   0  -31.50   46.50
   8 -21   0   49.70   46.70
   9 -21   0  -95.39   69.29
  -6 -22   0   35.40   79.99
  -5 -22   0  -44.60   41.50
  22  -5   0  -26.70   61.19
  22  -4   0   -7.10   52.49
  -4 -22   0  110.99   45.70
  -3 -22   0   32.30   45.70
  22  -3   0  -66.49   40.00
 -22   3   0   10.30   41.30
  22  -3   0  -41.60   42.80
   2  22   0  -21.50   41.40
  22  -2   0    1.80   40.90
  -2 -22   0  -32.50   44.80
 -22   2   0  -69.39   32.00
  -2 -22   0   17.70   41.30
  22  -1   0  136.49   51.59
   1  22   0  -31.60   37.50
  -1 -22   0  -47.50   39.60
  22  -1   0 -108.19   38.90
 -22   1   0  -32.20   31.30
  -1 -22   0  -13.60   49.90
 -22   1   0  -62.19   34.90
   0  22   0  -83.29   34.70
  22   0   0   20.80   46.40
  22   0   0  -25.10   38.30
 -22   0   0  -34.60   34.40
   0 -22   0  -47.70   41.20
   0 -22   0 -118.49   43.70
  -1  22   0  -45.30   33.10
 -22  -1   0  -30.00   45.30
   1 -22   0  -26.00   42.50
  22   1   0  -93.19   35.40
  22   1   0  -48.10   40.90
   1 -22   0  -56.69   46.30
 -22  -1   0  -56.19   29.90
  22   2   0   20.60   43.50
  22   2   0    9.80   45.40
  -2  22   0  -47.60   37.80
 -22  -2   0  -80.09   50.59
 -22  -2   0   18.20   33.40
 -22  -3   0   14.70   39.30
  22   3   0  -26.70   43.70
   3 -22   0  -45.90   45.80
   3 -22   0  -25.00   47.30
  22   3   0  -45.10   39.30
 -22  -4   0    8.60   50.19
   4 -22   0   65.39   43.50
  22   4   0  -94.99   73.59
  22   4   0    8.60   47.50
   4 -22   0  -47.10   61.39
   5 -22   0   -9.90   48.50
   6 -22   0 -128.49   51.69
   2  -1   1   18.30    6.80
  -1  -2   1   25.90    7.40
  -2   1   1   18.60    6.90
   1   2   1   20.20    6.50
   0  -2   1   54.99    8.00
   0   2   1   49.70    8.00
  -2   0   1   60.09    8.50
   2   0   1   62.39    8.30
   2   1   1   23.90    7.10
   1  -2   1   44.10    8.00
  -2  -1   1   20.70    7.30
  -2  -2   1 1343.87   47.70
  -2   2   1 1225.18   46.30
   2  -2   1 1277.37   47.70
   2   2   1 1254.97   47.00
   2   2  -1 1205.78   47.30
  -2  -2  -1 1152.38   52.69
  -2  -2  -1 1328.97   48.20
   2   2  -1 1090.29   46.30
  -2   2  -1 1122.89   46.10
   2  -2  -1 1170.98   46.60
  -2   2  -1 1220.88   46.80
  -2  -3   1  719.73   37.40
  -3   2   1  675.03   41.10
   2   3   1  670.43   40.60
   2   3   1  722.43   36.80
  -3   2   1  705.83   35.40
   3  -2   1  710.23   36.70
  -2  -3   1  754.82   37.20
   3  -2   1  697.13   36.30
   2   3  -1  712.03   36.50
   2   3  -1  752.62   38.10
  -3   2  -1  743.73   37.20
  -2  -3  -1  693.33   37.10
   3  -2  -1  755.22   36.20
  -2  -3  -1  749.82   37.50
   3  -2  -1  712.93   36.50
  -3   2  -1  719.03   36.80
  -3   1   1  885.71   39.30
  -3   1   1 1009.90   40.80
   3  -1   1  946.31   40.60
   3  -1   1  905.61   40.70
   1   3   1  980.30   40.00
  -1  -3   1 1012.50   41.10
   1   3   1  954.70   40.30
  -1  -3   1  997.10   41.60
  -3   1  -1  974.60   41.00
  -1  -3  -1  760.12   38.60
   1   3  -1  928.31   41.40
   3  -1  -1  820.62   39.00
   1   3  -1  925.21   40.20
   3  -1  -1  901.01   40.30
  -3   1  -1  926.91   40.50
  -1  -3  -1  937.81   41.00
  -3   0   1 1414.66   58.09
   3   0   1 1292.27   49.40
   0  -3   1 1422.46   50.79
   0   3   1 1328.47   57.29
   0   3   1 1278.37   48.80
   3   0   1 1309.47   56.19
  -3   0   1 1324.07   49.60
   0  -3   1 1386.66   57.19
  -3   0  -1 1144.89   48.60
   0   3  -1 1258.57   49.20
  -3   0  -1 1315.07   49.90
   0  -3  -1 1295.67   49.60
   0   3  -1 1306.97   50.19
   3   0  -1 1128.39   48.20
   0  -3  -1 1126.29   49.99
   3   0  -1 1227.38   49.80
  -3  -1   1  941.51   40.10
   1  -3   1  901.71   39.00
  -1   3   1  856.11   37.90
  -1   3   1  832.02   37.20
  -3  -1   1  892.01   39.10
   1  -3   1  944.91   40.10
   3   1   1  878.61   38.70
   3   1   1  849.61   38.90
  -3  -1  -1  923.71   39.30
   3   1  -1  858.61   38.90
   3   1  -1  815.82   37.70
  -1   3  -1  888.61   39.20
   1  -3  -1  746.83   37.50
  -3  -1  -1  839.42   38.10
  -3  -2   1  663.43   35.70
  -2   3   1  643.94   34.70
   3   2   1  680.23   35.70
   2  -3   1  697.43   35.90
   2  -3   1  681.53   35.30
  -3  -2   1  676.63   36.20
  -2   3   1  645.64   40.90
   3   2   1  644.24   36.60
   3   2  -1  645.54   34.80
  -3  -2  -1  669.13   35.50
   2  -3  -1  658.33   35.80
   2  -3  -1  682.13   35.10
  -3  -2  -1  714.03   36.40
   3   2  -1  732.03   36.80
  -2   3  -1  750.42   36.80
  -2   3  -1  672.93   35.00
  -3  -3   1   10.70   14.70
   3  -3   1   -3.50   13.20
   3   3   1   18.10   14.30
  -3  -3   1    1.30   13.10
   3  -3   1   15.50   14.20
   3   3   1    5.10   13.40
  -3   3   1   20.20   13.30
  -3   3   1    0.90   12.10
   3  -3  -1   12.00   13.40
  -3  -3  -1   -1.20   15.00
  -3   3  -1   18.20   14.00
   3  -3  -1   25.40   18.20
  -3  -3  -1    9.00   13.90
   3   3  -1   -0.60   13.70
  -3   3  -1    5.90   13.50
   3   3  -1   19.10   14.80
  -4   3   1 2205.18   81.49
  -3  -4   1 2220.78   82.79
   3   4   1 2078.19   80.69
   4  -3   1 2055.79   81.49
   4  -3   1 2045.90   81.49
  -4   3   1 2098.69   80.99
   3   4   1 2108.59   81.69
  -3  -4   1 2195.78   82.89
   3   4  -1 2022.80   85.39
   4  -3  -1 1990.90   80.89
  -3  -4  -1 2102.89   81.79
  -4   3  -1 2205.98   92.49
  -4   3  -1 2219.98   82.19
   4  -3  -1 2118.79   81.69
   3   4  -1 2214.68   82.19
  -3  -4  -1 2135.59   82.59
  -2  -4   1 1650.83   66.39
  -4   2   1 1788.82   67.09
   4  -2   1 1550.94   65.29
   2   4   1 1661.33   65.59
   2   4   1 1578.84   65.29
  -2  -4   1 1742.53   66.99
  -4   2   1 1629.04   65.59
   4  -2   1 1635.84   66.29
  -4   2  -1 1652.03   65.99
   4  -2  -1 1667.03   65.59
   2   4  -1 1602.74   65.99
  -2  -4  -1 1593.84   66.09
   2   4  -1 1604.94   67.79
  -4   2  -1 1635.44   66.19
  -1  -4   1 2575.34   88.89
  -1  -4   1 2580.44   97.29
   4  -1   1 2478.85   95.29
  -4   1   1 2458.75   87.39
   4  -1   1 2491.15   88.69
   1   4   1 2375.96   87.39
  -4   1   1 2540.05   88.79
   1   4   1 2462.25   87.89
  -1  -4  -1 2439.96   87.99
   4  -1  -1 2441.76   89.39
  -4   1  -1 2437.06   88.19
   4  -1  -1 2355.56   87.39
   1   4  -1 2386.16   87.79
  -1  -4  -1 2702.73   90.89
   1   4  -1 2316.07   87.89
  -4   1  -1 2571.44   88.49
   4   0   1 3115.89  108.29
  -4   0   1 3194.58  107.79
   4   0   1 3375.16  123.59
   0  -4   1 3399.86  109.39
  -4   0   1 3174.98  115.59
   0   4   1 3279.57  109.59
   0   4   1 3103.49  107.39
  -4   0  -1 3105.19  107.99
   4   0  -1 3119.29  108.19
   0  -4  -1 3379.46  109.19
   0   4  -1 3206.08  108.79
   4   0  -1 3183.08  108.89
  -4   0  -1 3227.18  108.79
   0   4  -1 3177.28  108.09
   0  -4  -1 3129.39  107.79
   1  -4   1 2612.34  105.09
  -1   4   1 2465.65   87.09
  -4  -1   1 2523.05   92.09
   4   1   1 2354.96   89.49
   1  -4   1 2591.34   88.29
  -1   4   1 2350.26   86.09
   4   1   1 2464.25   87.99
  -4  -1   1 2496.75   87.69
   1  -4  -1 2395.26   87.19
  -1   4  -1 2496.15   87.89
   4   1  -1 2431.76   87.59
  -1   4  -1 2387.96   86.79
   4   1  -1 2320.37   87.59
  -4  -1  -1 2418.76   87.49
  -4  -1  -1 2502.65   88.49
  -4  -2   1 1602.54   65.69
  -4  -2   1 1634.94   65.39
   2  -4   1 1787.32   66.99
   4   2   1 1581.24   65.69
   4   2   1 1613.24   65.49
   2  -4   1 1670.93   66.19
  -2   4   1 1612.64   64.19
  -2   4  -1 1626.84   64.99
   4   2  -1 1598.94   73.59
   4   2  -1 1543.15   65.29
  -2   4  -1 1654.83   65.99
   2  -4  -1 1525.35   64.39
  -4  -2  -1 1593.84   72.79
   2  -4  -1 1607.04   78.29
  -4  -2  -1 1623.24   66.09
   4   3   1 2294.67   84.29
   3  -4   1 2267.97   84.29
  -3   4   1 2145.89   82.09
  -4  -3   1 2122.19   83.29
   4   3   1 2232.58   84.59
   3  -4   1 2183.98   83.69
  -4  -3   1 2199.98   83.59
  -3   4   1 2121.19   81.59
  -4  -3  -1 2085.89   82.99
  -3   4  -1 2146.89   82.59
   3  -4  -1 2131.29   82.59
   4   3  -1 2237.08   83.59
  -3   4  -1 2182.78   92.89
   4   3  -1 2208.18   85.69
  -4  -3  -1 2130.19   83.19
   3  -4  -1 2114.49   82.39
   4   4   1   41.20   16.70
  -4  -4   1    3.20   14.10
  -4   4   1    8.90   14.50
   4  -4   1   -9.70   14.70
   4  -4   1   12.70   15.70
   4   4   1   32.40   15.60
  -4  -4   1   10.50   15.30
  -4   4   1    2.00   12.50
   4   4  -1   14.20   16.10
  -4  -4  -1   18.70   15.60
  -4  -4  -1   11.50   15.70
  -4   4  -1    1.50   13.60
   4  -4  -1   -0.20   14.00
   4   4  -1   -0.50   14.30
  -4   4  -1   23.80   14.60
   4  -4  -1    4.90   16.10
  -5   4   1   33.40   15.20
  -5   4   1    7.00   15.40
   4   5   1   38.70   16.70
   4   5   1   27.00   15.90
  -4  -5   1    3.60   15.50
   5  -4   1   -0.70   15.90
  -4  -5   1   15.50   16.10
   5  -4   1   11.80   16.40
   5  -4  -1   -2.40   15.20
   5  -4  -1   46.00   17.20
  -4  -5  -1   14.50   16.30
  -4  -5  -1    4.90   16.20
   4   5  -1    8.80   17.00
  -5   4  -1   24.70   15.40
  -5   4  -1   20.40   15.50
   4   5  -1   28.90   17.10
   3   5   1 1428.46   65.39
   5  -3   1 1464.25   65.69
  -3  -5   1 1530.05   66.99
  -3  -5   1 1403.86   65.19
  -5   3   1 1461.85   64.39
   5  -3   1 1429.36   65.09
  -5   3   1 1524.95   64.89
   3   5   1 1371.96   64.19
  -3  -5  -1 1445.96   65.39
   5  -3  -1 1434.96   65.39
   3   5  -1 1472.45   66.39
  -5   3  -1 1498.85   65.09
  -5   3  -1 1446.36   64.49
  -3  -5  -1 1483.25   66.29
   3   5  -1 1461.95   65.79
   5  -3  -1 1400.46   64.59
   2   5   1  245.78   28.00
  -2  -5   1  170.38   22.70
   2   5   1  215.58   26.90
  -2  -5   1  146.99   21.70
   5  -2   1  215.58   24.40
   5  -2   1  249.97   29.20
  -5   2   1  226.28   26.60
  -5   2   1  221.98   26.90
   2   5  -1  233.28   28.70
  -5   2  -1  228.18   27.50
   2   5  -1  183.08   23.10
   5  -2  -1  251.27   29.70
  -2  -5  -1  249.38   28.50
  -2  -5  -1  155.68   22.30
  -5   2  -1  180.58   23.30
   5  -2  -1  164.88   21.40
  -1  -5   1 3552.64  121.29
   1   5   1 3532.75  120.89
  -1  -5   1 3657.03  122.59
  -5   1   1 3450.35  120.19
  -5   1   1 3351.16  119.39
   5  -1   1 3482.35  121.89
   1   5   1 3476.55  120.59
   5  -1   1 3495.65  120.99
  -5   1  -1 3472.45  121.19
  -5   1  -1 3540.65  121.49
  -1  -5  -1 3721.53  121.89
   1   5  -1 3463.75  126.09
   5  -1  -1 3644.34  121.59
   1   5  -1 3521.55  121.89
   5  -1  -1 3414.06  120.89
  -1  -5  -1 3338.57  120.69
   5   0   1  962.60   49.70
   0  -5   1 1061.79   50.79
  -5   0   1 1045.30   49.40
   0   5   1  968.20   48.70
   0   5   1 1024.00   49.70
  -5   0   1 1034.50   49.40
   5   0   1  990.50   49.70
   0  -5   1  996.90   49.70
  -5   0  -1 1045.00   50.29
   0  -5  -1 1028.50   50.79
   0   5  -1  947.51   57.79
  -5   0  -1 1104.59   54.89
   5   0  -1 1011.80   50.29
   5   0  -1  953.40   48.80
   0   5  -1 1052.59   50.49
   0  -5  -1 1031.00   50.39
   5   1   1 3561.44  123.29
   1  -5   1 3561.14  122.99
   1  -5   1 3735.03  123.09
  -5  -1   1 3453.05  122.39
  -1   5   1 3633.64  121.99
  -1   5   1 3554.64  121.79
  -5  -1   1 3651.03  123.79
   5   1   1 3370.36  121.39
   1  -5  -1 3393.56  121.59
  -1   5  -1 3605.84  122.59
   5   1  -1 3506.55  122.89
  -5  -1  -1 3694.33  123.89
  -1   5  -1 3717.33  127.59
  -5  -1  -1 3511.85  122.89
   5   1  -1 3499.35  122.99
  -5  -2   1  223.08   27.20
   5   2   1  176.58   23.20
  -2   5   1  184.18   22.70
   5   2   1  159.38   22.00
   2  -5   1  189.28   22.80
  -2   5   1  200.78   25.30
  -5  -2   1  162.18   21.50
   2  -5   1  196.58   23.50
   5   2  -1  185.48   23.60
  -2   5  -1  221.28   27.80
   2  -5  -1  225.58   27.90
   2  -5  -1  215.78   27.00
  -5  -2  -1  220.18   27.60
   5   2  -1  244.58   28.80
  -5  -2  -1  173.98   22.70
  -5  -3   1 1566.04   68.69
  -3   5   1 1617.34   67.69
  -5  -3   1 1441.66   66.99
   3  -5   1 1585.04   68.19
   3  -5   1 1640.54   68.59
  -3   5   1 1486.35   65.89
   5   3   1 1498.25   67.29
   5   3   1 1488.35   67.39
  -3   5  -1 1652.93   68.29
   5   3  -1 1604.24   69.59
  -5  -3  -1 1558.14   68.89
   3  -5  -1 1509.95   66.99
   3  -5  -1 1407.96   66.59
   5   3  -1 1414.26   67.19
  -5  -3  -1 1512.35   67.69
  -3   5  -1 1608.54   67.69
   5   4   1   10.30   15.60
  -5  -4   1   22.40   15.50
  -5  -4   1   27.30   17.30
   5   4   1   14.10   16.00
   4  -5   1   32.40   17.70
   4  -5   1   14.30   15.70
  -4   5   1   -2.20   14.70
  -4   5   1   25.70   14.70
  -5  -4  -1   -9.60   14.20
   5   4  -1   16.80   16.10
  -4   5  -1   13.60   14.60
   5   4  -1   37.90   17.80
  -4   5  -1   26.70   15.00
  -5  -4  -1   17.90   16.90
   4  -5  -1    9.90   15.90
   4  -5  -1  -10.30   14.80
   5  -5   1  -17.20   14.40
   5  -5   1   35.60   16.30
  -5  -5   1   11.80   16.10
  -5  -5   1   20.20   16.40
  -5   5   1    1.30   13.90
   5   5   1   14.80   15.40
  -5   5   1  -12.50   13.40
   5   5   1  -18.80   15.30
  -5  -5  -1   18.30   16.60
   5  -5  -1    9.00   16.50
  -5   5  -1    1.70   14.30
   5   5  -1   15.20   16.90
  -5  -5  -1   -2.90   15.50
   5  -5  -1   12.50   17.00
   5   5  -1   13.20   17.50
   6  -5   1  242.48   31.90
   5   6   1  302.27   36.10
  -6   5   1  301.77   34.60
   6  -5   1  275.37   34.50
  -6   5   1  317.27   33.30
  -5  -6   1  341.97   36.40
   5   6   1  305.87   35.80
  -5  -6   1  288.87   36.10
   5   6  -1  343.97   36.90
   6  -5  -1  311.87   36.50
  -6   5  -1  331.37   36.70
  -6   5  -1  232.78   29.20
  -5  -6  -1  248.88   37.80
   6  -5  -1  279.57   43.30
   5   6  -1  327.47   37.80
  -5  -6  -1  231.78   30.40
   4   6   1  387.96   37.60
  -4  -6   1  402.16   38.30
  -6   4   1  467.95   37.30
  -6   4   1  448.16   37.40
   6  -4   1  392.36   38.00
   6  -4   1  362.26   36.50
  -4  -6   1  454.05   38.80
   4   6   1  411.36   37.60
  -4  -6  -1  380.46   37.20
   6  -4  -1  423.56   37.90
  -4  -6  -1  373.36   37.30
   6  -4  -1  417.56   39.00
  -6   4  -1  368.36   42.90
  -6   4  -1  439.46   37.50
   4   6  -1  377.26   37.10
   3   6   1  184.98   24.20
  -3  -6   1  106.49   21.90
  -6   3   1  135.99   22.20
   6  -3   1  125.39   22.50
   6  -3   1  104.99   21.20
   3   6   1  128.59   21.00
  -3  -6   1  123.19   22.70
  -6   3   1  112.79   20.10
  -3  -6  -1  156.78   23.50
  -6   3  -1  148.69   22.70
   6  -3  -1  110.19   21.60
  -6   3  -1  120.79   21.30
  -3  -6  -1  134.69   23.40
   3   6  -1  139.39   22.80
   6  -3  -1  103.49   21.60
   3   6  -1  114.79   21.50
   6  -2   1  397.96   36.30
  -2  -6   1  390.16   34.50
   6  -2   1  347.27   34.00
  -6   2   1  450.75   35.40
   2   6   1  470.15   35.70
   2   6   1  380.76   35.10
  -6   2   1  439.66   35.70
  -2  -6   1  368.16   35.60
  -6   2  -1  408.16   34.60
  -2  -6  -1  428.16   36.10
  -2  -6  -1  424.86   36.60
   6  -2  -1  421.76   36.60
   2   6  -1  361.66   34.50
   6  -2  -1  373.36   35.10
   2   6  -1  404.36   35.90
  -6   2  -1  419.36   35.80
   6  -1   1 2826.22  105.49
   1   6   1 2754.42  103.89
  -6   1   1 2734.43  102.89
  -1  -6   1 2931.71  104.99
  -1  -6   1 2871.51  105.19
  -6   1   1 2703.03  102.69
   1   6   1 2739.53  103.19
   6  -1   1 2759.42  104.29
   6  -1  -1 2701.93  103.39
  -6   1  -1 2662.13  103.09
  -1  -6  -1 2942.21  105.69
  -1  -6  -1 2683.73  103.49
   1   6  -1 2842.22  105.49
   6  -1  -1 2801.02  104.79
  -6   1  -1 2783.32  103.69
   1   6  -1 2743.23  103.89
   0   6   1  899.91   48.50
   0  -6   1  993.70   51.59
  -6   0   1  891.91   48.90
   0  -6   1  918.31   49.30
   6   0   1  928.41   49.70
   6   0   1  848.02   49.99
   0   6   1  871.61   48.80
  -6   0   1  831.42   48.90
   0   6  -1  895.31   49.60
  -6   0  -1  922.31   50.29
   0  -6  -1  925.01   50.39
   6   0  -1  926.71   50.09
   0   6  -1  862.11   49.70
   6   0  -1  864.21   49.70
   0  -6  -1 1030.70   51.99
  -6   0  -1  896.81   49.60
  -6  -1   1 2907.11  108.99
   6   1   1 2921.91  109.39
  -1   6   1 3088.49  109.59
  -1   6   1 2888.11  106.99
  -6  -1   1 3072.89  109.29
   1  -6   1 3111.29  110.59
   6   1   1 2981.00  108.69
   1  -6  -1 2900.21  108.39
  -1   6  -1 2868.41  107.89
   6   1  -1 2823.72  108.59
  -6  -1  -1 2874.41  108.49
   6   1  -1 2863.41  109.59
  -6  -1  -1 2898.41  108.19
  -1   6  -1 2938.81  108.99
  -6  -2   1  429.36   36.30
  -2   6   1  391.66   34.00
   6   2   1  391.26   34.50
   6   2   1  388.76   35.50
  -2   6   1  405.16   34.60
  -6  -2   1  397.06   35.10
   2  -6   1  383.26   34.80
   2  -6   1  453.75   36.70
   6   2  -1  382.36   36.90
  -6  -2  -1  387.96   35.30
   2  -6  -1  413.26   35.90
   6   2  -1  371.76   35.10
  -2   6  -1  437.86   36.00
  -6  -2  -1  422.16   36.00
   2  -6  -1  454.65   35.60
  -6  -3   1  154.48   23.00
   3  -6   1  167.98   23.60
  -3   6   1  227.18   28.10
  -6  -3   1  177.88   24.10
   6   3   1  158.58   24.00
   6   3   1  175.18   23.50
   3  -6   1  137.49   23.40
  -6  -3  -1  139.19   23.60
  -6  -3  -1  179.28   25.30
   6   3  -1  159.88   25.00
   3  -6  -1  161.48   23.70
  -3   6  -1  197.48   25.00
   3  -6  -1  156.68   22.70
   6   3  -1  175.48   24.60
  -3   6  -1  175.18   24.20
   4  -6   1  462.15   38.50
   4  -6   1  408.46   37.80
  -6  -4   1  433.56   38.10
  -4   6   1  453.45   38.50
   6   4   1  400.56   37.80
   6   4   1  392.36   38.10
  -6  -4   1  356.66   36.20
  -4   6   1  412.76   36.70
   6   4  -1  378.76   38.00
   4  -6  -1  402.66   37.10
  -6  -4  -1  486.25   41.40
  -4   6  -1  473.65   38.60
   4  -6  -1  448.36   38.90
  -4   6  -1  443.66   42.20
   6   4  -1  372.66   45.10
  -6  -4  -1  434.56   38.80
  -5   6   1  249.58   31.30
   6   5   1  288.67   36.00
  -6  -5   1  260.77   31.50
   5  -6   1  226.48   31.00
  -5   6   1  302.07   35.20
   6   5   1  271.77   33.90
   5  -6   1  227.68   29.70
  -6  -5   1  230.48   30.10
   6   5  -1  236.78   30.80
   5  -6  -1  298.57   35.00
  -5   6  -1  283.47   34.60
  -5   6  -1  299.47   33.50
   6   5  -1  250.17   31.00
  -6  -5  -1  240.38   33.30
   5  -6  -1  340.67   47.30
  -6  -5  -1  252.37   30.50
   6   6   1  140.39   26.90
   6  -6   1  125.69   26.10
   6   6   1  125.39   25.10
   6  -6   1  123.09   27.10
  -6   6   1  185.58   28.30
  -6  -6   1  113.19   25.90
  -6   6   1  130.39   23.20
  -6  -6   1  101.59   34.60
  -6  -6  -1  156.58   25.90
  -6   6  -1  143.99   26.60
   6  -6  -1  118.29   25.10
   6   6  -1  133.29   26.20
  -6   6  -1  103.99   22.90
   6  -6  -1  122.09   25.90
  -6  -6  -1  129.49   26.40
   6   6  -1  108.19   25.20
  -7   6   1  266.97   45.80
   7  -6   1  251.67   33.80
  -6  -7   1  315.87   38.90
  -7   6   1  325.57   39.30
   6   7   1  324.77   38.90
  -6  -7   1  257.17   34.10
   6   7   1  253.57   41.30
   7  -6   1  237.18   33.90
  -6  -7  -1  308.77   38.60
   6   7  -1  285.97   35.70
  -6  -7  -1  230.18   32.90
  -7   6  -1  302.07   37.20
  -7   6  -1  343.67   37.80
   7  -6  -1  345.17   40.00
   6   7  -1  234.58   32.90
   7  -6  -1  260.87   33.40
  -7   5   1  298.67   35.90
   5   7   1  357.36   39.00
  -7   5   1  367.16   39.80
  -5  -7   1  343.27   42.20
  -5  -7   1  345.37   40.70
   7  -5   1  383.86   40.70
   5   7   1  354.76   39.90
   7  -5   1  267.97   33.90
   5   7  -1  400.76   40.60
   5   7  -1  342.27   39.80
  -5  -7  -1  349.27   39.70
   7  -5  -1  341.07   40.10
  -7   5  -1  394.16   39.70
  -7   5  -1  332.17   38.50
   7  -5  -1  423.46   41.80
  -5  -7  -1  374.56   40.60
   7  -4   1   97.59   22.30
   4   7   1  121.79   23.20
  -7   4   1   92.59   20.90
  -4  -7   1   79.49   21.90
   7  -4   1   54.99   25.40
  -7   4   1  123.69   24.00
  -4  -7   1   60.49   23.00
   4   7   1  109.29   23.20
  -7   4  -1  119.79   24.10
   4   7  -1  116.09   23.10
   7  -4  -1   50.79   21.90
  -4  -7  -1   88.89   24.10
   7  -4  -1   61.39   21.90
  -7   4  -1   81.79   20.50
  -4  -7  -1   71.39   22.70
   4   7  -1   88.89   22.40
   7  -3   1  683.23   47.10
  -7   3   1  643.34   45.60
  -3  -7   1  667.33   47.10
  -7   3   1  726.93   46.60
   7  -3   1  660.63   48.30
  -3  -7   1  655.83   47.60
   3   7   1  680.53   46.10
   3   7   1  651.53   46.40
  -7   3  -1  619.64   45.80
  -7   3  -1  617.24   44.70
  -3  -7  -1  654.73   56.49
  -3  -7  -1  709.53   48.10
   7  -3  -1  647.14   55.59
   3   7  -1  624.94   45.90
   7  -3  -1  668.63   47.80
   3   7  -1  598.54   46.20
   7  -2   1  364.46   36.70
  -2  -7   1  378.76   36.20
  -7   2   1  338.97   34.80
  -2  -7   1  393.76   36.80
  -7   2   1  378.26   34.80
   2   7   1  276.37   33.90
   7  -2   1  376.66   36.10
   2   7   1  311.77   35.50
  -7   2  -1  315.37   34.50
  -7   2  -1  360.66   44.50
   2   7  -1  342.97   39.80
  -2  -7  -1  335.57   35.40
  -2  -7  -1  301.37   35.50
   7  -2  -1  400.56   38.40
   7  -2  -1  322.27   35.00
   2   7  -1  328.57   34.80
   7  -1   1    0.40   16.20
   7  -1   1   36.60   17.30
  -1  -7   1   16.90   16.00
   1   7   1   -1.10   13.70
  -1  -7   1   19.60   17.40
   1   7   1   -3.50   13.90
  -7   1   1   17.30   13.80
  -7   1   1   22.20   16.60
  -7   1  -1   12.10   15.40
  -1  -7  -1   16.70   17.90
  -7   1  -1   27.30   19.90
   7  -1  -1   20.80   17.20
   1   7  -1   26.20   15.50
   7  -1  -1    8.10   16.80
  -1  -7  -1   26.40   18.20
   0   7   1  978.20   54.39
   7   0   1 1028.60   56.39
   0   7   1  986.70   55.19
   0  -7   1 1093.99   57.29
  -7   0   1  990.40   54.99
   7   0   1 1047.30   55.79
   0  -7   1  994.20   54.69
  -7   0   1 1063.89   55.69
   0  -7  -1  986.10   55.39
   0   7  -1 1040.70   56.19
   7   0  -1 1003.70   56.59
   0  -7  -1 1075.59   56.69
  -7   0  -1 1042.70   56.99
  -7   0  -1 1001.60   54.49
   7   0  -1  989.10   55.79
   7   1   1   36.20   17.40
   1  -7   1  -10.70   14.00
  -1   7   1    1.10   15.70
  -7  -1   1   18.30   17.00
  -7  -1   1   -4.80   12.60
  -1   7   1    0.30   13.60
   7   1   1   21.90   16.90
   1  -7  -1   -8.00   16.10
  -1   7  -1    6.90   13.90
   7   1  -1   32.00   17.30
  -7  -1  -1   25.50   16.40
  -1   7  -1  -14.80   23.00
  -7  -1  -1   36.00   18.10
   7   1  -1   24.40   17.70
  -2   7   1  341.87   34.70
   2  -7   1  404.46   36.80
  -7  -2   1  384.66   36.80
  -2   7   1  346.47   36.20
  -7  -2   1  355.76   35.50
   2  -7   1  385.56   36.40
   7   2   1  371.56   36.20
   7   2   1  354.86   36.40
   2  -7  -1  324.97   34.80
   7   2  -1  329.97   37.30
   7   2  -1  349.77   35.90
  -2   7  -1  308.67   34.00
  -2   7  -1  362.86   36.70
   2  -7  -1  374.16   36.00
  -7  -2  -1  366.46   36.30
  -7  -2  -1  309.87   38.40
   7   3   1  669.73   47.50
  -7  -3   1  648.54   47.10
   7   3   1  670.73   46.60
  -7  -3   1  676.73   46.70
  -3   7   1  557.74   42.80
   3  -7   1  715.63   47.40
  -3   7   1  677.93   46.00
   3  -7   1  593.24   46.00
  -3   7  -1  698.53   46.50
  -7  -3  -1  607.54   54.99
   7   3  -1  600.24   46.80
  -7  -3  -1  644.54   46.60
   3  -7  -1  587.24   45.80
   3  -7  -1  644.74   46.50
   7   3  -1  697.63   51.49
   7   4   1   80.09   22.80
   7   4   1   88.69   22.90
  -7  -4   1   92.29   23.20
  -4   7   1   92.49   20.60
   4  -7   1   84.99   21.60
  -7  -4   1   98.59   21.90
  -4   7  -1   97.49   21.80
  -7  -4  -1   86.79   23.40
   4  -7  -1   68.19   21.80
   7   4  -1  100.89   23.20
  -7  -4  -1   88.49   23.60
   7   4  -1  107.49   24.40
   4  -7  -1   80.69   27.50
  -4   7  -1   72.39   21.10
  -5   7   1  394.36   38.80
   7   5   1  424.66   45.70
   5  -7   1  410.96   41.90
   7   5   1  380.16   41.50
  -7  -5   1  412.06   42.50
   5  -7   1  372.46   41.30
  -5   7   1  387.06   39.50
   5  -7  -1  397.26   40.20
  -7  -5  -1  347.57   41.70
   5  -7  -1  398.26   41.40
  -5   7  -1  390.26   41.50
   7   5  -1  378.76   42.20
   7   5  -1  457.45   43.70
  -7  -5  -1  427.36   41.10
  -5   7  -1  451.75   41.10
   6  -7   1  267.07   34.20
  -6   7   1  387.26   39.90
  -6   7   1  366.66   44.10
  -7  -6   1  277.47   34.80
   6  -7   1  240.18   32.00
   7   6   1  317.17   38.60
  -7  -6   1  338.97   40.50
   7   6   1  224.18   34.00
  -6   7  -1  324.07   37.50
   6  -7  -1  335.67   39.50
  -6   7  -1  267.07   33.10
   7   6  -1  330.57   39.60
  -7  -6  -1  327.47   39.30
  -7  -6  -1  251.67   33.90
   7   6  -1  257.47   34.40
   6  -7  -1  318.07   39.10
  -7  -7   1  493.55   48.10
   7  -7   1  509.05   47.70
   7   7   1  469.45   46.10
  -7   7   1  538.25   45.60
   7  -7   1  517.75   48.30
  -7   7   1  595.74   47.40
   7   7   1  505.75   46.60
  -7  -7   1  516.05   47.90
   7  -7  -1  526.95   49.20
   7  -7  -1  554.04   49.90
  -7  -7  -1  476.45   47.70
   7   7  -1  514.65   47.90
  -7   7  -1  532.85   46.50
  -7  -7  -1  528.25   48.40
  -7   7  -1  488.95   46.60
   7   7  -1  517.15   49.00
  -8   7   1   13.30   16.50
   8  -7   1   -5.30   19.50
   8  -7   1    5.20   21.10
   7   8   1    1.60   17.90
  -7  -8   1   -5.00   18.50
  -7  -8   1   -2.60   16.60
  -8   7   1    5.00   14.30
   7   8   1   -2.10   17.00
  -7  -8  -1  -16.40   17.90
   7   8  -1   23.50   22.20
   7   8  -1    3.00   18.80
   8  -7  -1  -18.00   17.80
  -8   7  -1   20.20   17.90
   8  -7  -1   -9.40   21.10
  -7  -8  -1    9.90   20.60
  -8   7  -1    7.30   19.30
  -6  -8   1  446.96   46.00
  -8   6   1  458.75   43.30
  -8   6   1  456.05   43.10
   8  -6   1  418.86   45.60
   8  -6   1  501.55   46.30
   6   8   1  436.86   44.60
   6   8   1  487.15   46.90
  -6  -8   1  396.76   44.20
   8  -6  -1  447.06   45.80
   8  -6  -1  494.85   47.50
  -6  -8  -1  523.65   47.40
  -8   6  -1  470.25   44.30
  -6  -8  -1  395.66   45.60
  -8   6  -1  497.75   46.30
   6   8  -1  469.55   47.00
   6   8  -1  556.84   48.60
  -8   5   1   11.70   17.80
   8  -5   1   -7.10   19.50
  -8   5   1   14.10   23.40
   8  -5   1   29.20   21.60
  -5  -8   1   19.90   18.90
   5   8   1   18.90   18.10
   5   8   1    4.30   16.40
  -5  -8   1   -0.60   19.50
   5   8  -1   15.20   19.10
  -8   5  -1   26.50   18.50
  -5  -8  -1   23.50   20.30
   8  -5  -1    3.90   20.90
   8  -5  -1   20.30   19.20
  -5  -8  -1    9.70   18.50
  -8   5  -1   15.00   18.50
   5   8  -1   12.40   18.40
   8  -4   1  495.35   46.60
   8  -4   1  492.25   44.90
  -8   4   1  421.96   41.90
  -4  -8   1  466.75   44.80
   4   8   1  466.55   44.80
  -4  -8   1  449.16   44.00
   4   8   1  496.05   51.49
  -8   4   1  482.75   44.20
  -4  -8  -1  462.75   43.40
   4   8  -1  480.15   44.60
   4   8  -1  434.76   43.50
  -4  -8  -1  494.25   45.70
  -8   4  -1  451.85   43.00
  -8   4  -1  415.86   41.40
   8  -4  -1  451.05   44.40
   8  -4  -1  449.86   44.50
   3   8   1  782.52   53.09
  -8   3   1  803.12   52.99
   8  -3   1  683.03   51.59
  -3  -8   1  753.82   53.79
  -3  -8   1  752.72   53.09
  -8   3   1  700.73   49.50
   8  -3   1  812.42   61.19
   3   8   1  743.83   52.69
  -3  -8  -1  780.92   55.29
   8  -3  -1  704.73   51.99
   3   8  -1  745.23   53.89
  -8   3  -1  719.53   50.79
   8  -3  -1  781.82   52.89
  -8   3  -1  874.01   55.69
  -3  -8  -1  737.83   51.89
   3   8  -1  789.12   53.99
  -8   2   1  347.17   39.00
  -2  -8   1  315.17   47.40
   8  -2   1  409.36   41.00
  -8   2   1  378.46   37.10
   8  -2   1  299.87   40.70
   2   8   1  441.26   40.70
   2   8   1  546.65   42.40
  -2  -8   1  460.75   42.50
  -2  -8  -1  399.86   40.80
  -2  -8  -1  419.56   39.90
   8  -2  -1  422.56   41.60
   2   8  -1  485.15   42.40
   8  -2  -1  463.95   42.20
  -8   2  -1  437.66   40.60
   2   8  -1  404.26   40.50
  -8   2  -1  390.86   38.90
  -8   1   1  119.89   24.20
  -1  -8   1  101.29   23.60
   8  -1   1  164.48   26.40
   8  -1   1  121.49   25.90
  -1  -8   1   98.79   31.80
  -8   1   1  109.39   21.40
   1   8   1  153.58   25.50
   1   8   1  154.28   24.80
  -8   1  -1  153.08   24.80
  -1  -8  -1  134.49   30.30
   1   8  -1  124.19   24.90
   8  -1  -1  106.99   25.00
  -8   1  -1  139.29   25.30
  -1  -8  -1  125.49   24.90
   1   8  -1  125.19   23.80
   8  -1  -1  118.49   25.30
  -8   0   1   86.29   22.50
   8   0   1   64.59   20.20
   0   8   1   56.29   19.10
   0  -8   1   74.09   22.30
   8   0   1   72.49   21.80
   0   8   1  108.59   23.20
  -8   0   1   55.89   18.80
   0  -8   1   61.99   25.90
   8   0  -1   97.69   23.80
   0   8  -1   75.49   21.80
  -8   0  -1   78.79   21.30
   0   8  -1   84.79   21.00
   0  -8  -1   71.59   26.00
   0  -8  -1   62.69   21.30
  -8   0  -1   96.69   23.20
   8   0  -1   84.59   22.30
  -1   8   1  139.09   24.90
   1  -8   1  120.69   24.30
   8   1   1  118.29   24.40
   8   1   1  105.49   24.10
  -8  -1   1  224.38   30.30
  -1   8   1  146.09   23.80
  -8  -1   1  178.38   25.50
  -8  -1  -1  165.08   25.60
  -1   8  -1  165.08   27.00
   1  -8  -1  127.39   31.00
  -1   8  -1  159.58   25.50
  -8  -1  -1  174.88   27.90
   8   1  -1  162.78   27.10
   8   1  -1  156.98   26.90
  -2   8   1  520.15   41.40
  -8  -2   1  462.75   40.70
  -8  -2   1  395.86   41.30
  -2   8   1  491.25   41.80
   8   2   1  461.55   42.70
   2  -8   1  485.55   52.39
   8   2   1  457.15   43.90
   2  -8   1  474.15   43.00
   2  -8  -1  466.15   41.00
   8   2  -1  443.06   43.00
  -2   8  -1  410.16   40.40
  -8  -2  -1  466.45   41.80
  -8  -2  -1  467.85   42.60
   2  -8  -1  420.36   41.50
   8   2  -1  471.15   43.30
  -2   8  -1  481.25   42.40
  -8  -3   1  843.32   62.09
   3  -8   1  857.41   56.19
  -3   8   1  858.91   54.29
   3  -8   1  932.21   57.49
  -3   8   1  843.02   55.29
   8   3   1  889.71   67.09
   8   3   1  946.51   58.39
  -8  -3   1  877.01   56.19
  -3   8  -1  847.52   55.19
   3  -8  -1  866.01   56.99
  -3   8  -1  919.31   55.69
  -8  -3  -1  799.32   55.39
   3  -8  -1  839.22   55.59
   8   3  -1  846.12   57.09
   8   3  -1  858.71   56.49
  -8  -3  -1  918.11   57.29
   8   4   1  486.45   56.99
   4  -8   1  567.94   47.40
   4  -8   1  481.45   46.10
  -8  -4   1  428.66   45.30
  -4   8   1  510.55   43.20
  -8  -4   1  462.65   45.40
   8   4   1  526.25   46.20
   8   4  -1  401.56   42.60
   4  -8  -1  481.85   44.80
  -8  -4  -1  438.26   44.10
  -4   8  -1  465.85   42.70
   8   4  -1  466.45   43.40
  -8  -4  -1  522.65   45.50
   4  -8  -1  498.05   44.40
  -8  -5   1   21.40   18.30
   5  -8   1   39.80   22.50
   8   5   1    0.50   17.40
  -8  -5   1   57.19   22.50
   5  -8   1   26.70   20.80
   8   5   1   15.70   18.70
  -5   8   1   36.20   19.30
   5  -8  -1   31.70   22.40
  -8  -5  -1   47.10   20.80
  -5   8  -1   15.60   18.10
   5  -8  -1   13.40   18.40
   8   5  -1   10.70   19.30
   8   5  -1   -6.70   17.00
  -5   8  -1    3.50   18.20
  -8  -5  -1   26.30   19.70
   8   6   1  558.14   49.20
  -6   8   1  573.34   47.30
  -6   8   1  587.14   46.80
   6  -8   1  566.14   48.90
  -8  -6   1  582.74   49.80
   6  -8   1  542.85   49.10
   8   6   1  579.04   49.80
  -8  -6   1  568.94   49.80
  -6   8  -1  524.55   47.60
  -8  -6  -1  560.04   49.60
  -8  -6  -1  501.15   47.90
  -6   8  -1  533.55   47.20
   6  -8  -1  547.05   49.20
   8   6  -1  496.15   48.80
   6  -8  -1  519.05   49.80
   8   6  -1  449.76   46.50
  -7   8   1   26.50   16.40
  -7   8   1    1.50   16.00
   8   7   1   41.30   20.10
   8   7   1    8.30   17.30
   7  -8   1    9.10   20.70
   7  -8   1   -1.70   18.80
  -8  -7   1   -8.10   16.50
  -8  -7   1   17.40   20.50
  -7   8  -1  -14.10   14.70
   7  -8  -1   26.20   20.70
   8   7  -1    2.40   19.70
  -8  -7  -1    7.20   20.80
   7  -8  -1  -25.60   19.80
   8   7  -1   32.70   21.00
  -8  -7  -1   42.10   22.30
  -7   8  -1  -11.50   18.00
  -8  -8   1   22.70   21.20
   8  -8   1   32.70   23.30
   8  -8   1   12.00   20.80
  -8  -8   1   65.89   23.80
  -8   8   1   58.69   22.40
   8   8   1   40.10   20.30
   8   8   1   30.90   20.90
  -8   8   1   41.00   19.30
  -8  -8  -1   31.40   22.80
   8  -8  -1   48.10   22.90
  -8   8  -1   23.50   17.80
   8  -8  -1   28.10   22.70
  -8   8  -1   49.40   22.00
   8   8  -1   78.59   24.90
  -8  -8  -1   49.70   23.30
   8   8  -1   31.70   24.40
  -9   8   1   -3.90   14.60
   9  -8   1   10.30   22.80
  -9   8   1   -1.70   17.90
   8   9   1   32.30   20.10
  -8  -9   1   -1.70   23.10
   8   9   1   26.80   21.30
  -8  -9   1   10.00   22.30
   9  -8   1  -12.30   20.10
  -9   8  -1   -4.80   16.20
  -8  -9  -1    2.10   20.10
   8   9  -1   -5.70   21.80
   9  -8  -1    8.60   23.60
   8   9  -1   29.60   24.80
  -8  -9  -1    9.50   22.40
  -9   8  -1   28.90   19.90
   9  -8  -1   32.70   23.90
  -7  -9   1  187.38   32.50
  -9   7   1  147.79   26.40
   7   9   1  108.89   25.30
  -9   7   1  132.89   28.20
   9  -7   1  167.68   32.90
   7   9   1  140.89   28.90
  -7  -9   1  114.59   29.20
   9  -7   1   86.89   27.90
   7   9  -1  101.79   28.30
  -7  -9  -1  127.69   29.70
   9  -7  -1  149.19   29.60
  -7  -9  -1   98.99   28.70
   7   9  -1  137.29   30.80
  -9   7  -1  127.69   27.40
  -9   7  -1  163.88   29.30
   9  -7  -1  106.59   29.30
   6   9   1   98.39   26.50
  -9   6   1  145.99   28.00
  -9   6   1  118.29   25.20
   9  -6   1   61.39   25.00
   6   9   1  115.39   27.30
  -6  -9   1  101.29   26.00
  -6  -9   1  139.39   29.00
   9  -6   1   77.49   23.80
  -6  -9  -1  161.18   32.30
   6   9  -1  116.29   27.00
  -9   6  -1  129.09   26.90
   9  -6  -1   75.79   26.10
  -6  -9  -1  113.29   28.30
  -9   6  -1  156.18   28.50
   6   9  -1  103.09   26.70
   9  -6  -1  100.29   28.70
   9  -5   1   65.99   23.50
   5   9   1   77.89   23.30
  -9   5   1   94.69   24.40
  -5  -9   1   80.09   24.70
  -9   5   1   54.99   20.50
  -5  -9   1  104.79   25.40
   5   9   1   94.79   24.70
   9  -5   1   77.09   24.40
   5   9  -1   83.19   24.90
  -9   5  -1  116.39   26.00
   5   9  -1   99.59   25.10
   9  -5  -1   98.09   26.00
  -5  -9  -1  130.39   27.70
  -5  -9  -1  161.18   30.40
   9  -5  -1   81.29   26.00
  -9   5  -1  129.09   26.30
   9  -4   1  134.89   28.10
  -9   4   1  121.09   24.10
  -4  -9   1   96.09   26.70
   4   9   1  140.69   26.50
   4   9   1  116.49   26.90
  -4  -9   1  111.99   26.30
  -9   4   1  133.29   26.90
   9  -4   1  101.49   25.70
   4   9  -1   92.49   25.60
  -9   4  -1  148.19   27.60
   9  -4  -1   91.59   25.00
  -4  -9  -1  104.69   26.40
   4   9  -1   98.49   24.70
  -4  -9  -1   92.09   25.40
  -9   4  -1  163.28   28.90
   9  -4  -1  119.79   26.90
   9  -3   1  558.84   48.20
  -9   3   1  550.24   45.90
   3   9   1  547.95   47.60
   3   9   1  642.54   53.29
  -9   3   1  621.54   49.30
  -3  -9   1  534.45   47.50
   9  -3   1  577.74   50.39
  -3  -9   1  587.74   48.80
  -9   3  -1  560.94   47.50
   3   9  -1  616.94   48.80
   9  -3  -1  524.55   48.50
   9  -3  -1  568.64   48.50
  -3  -9  -1  546.25   48.20
  -9   3  -1  586.04   46.80
  -3  -9  -1  501.65   47.30
   3   9  -1  551.64   48.00
   2   9   1  479.35   57.29
   9  -2   1  435.56   45.70
   9  -2   1  464.15   45.30
  -2  -9   1  525.05   46.90
   2   9   1  538.95   46.60
  -9   2   1  510.25   45.70
  -2  -9   1  501.65   46.10
  -9   2   1  594.44   59.19
  -9   2  -1  523.05   45.30
  -2  -9  -1  581.64   47.40
  -2  -9  -1  481.85   45.40
  -9   2  -1  456.05   43.40
   2   9  -1  535.05   45.90
   2   9  -1  542.45   46.90
   9  -2  -1  547.45   49.80
   9  -2  -1  487.25   46.20
   9  -1   1  143.09   28.60
  -9   1   1  195.08   30.30
  -1  -9   1  119.49   27.60
  -1  -9   1  155.68   28.20
   9  -1   1  152.58   28.60
   1   9   1  193.68   30.00
   1   9   1  197.68   30.30
   9  -1  -1  150.88   26.50
  -9   1  -1  180.78   27.60
  -1  -9  -1  156.48   27.90
   1   9  -1  161.98   29.50
   1   9  -1  171.58   28.20
   9  -1  -1  167.38   28.40
  -1  -9  -1  168.28   27.70
  -9   1  -1  188.38   29.90
   9   0   1   18.20   20.10
   0   9   1   31.00   21.50
   9   0   1   -2.10   19.50
   0  -9   1   24.80   19.90
  -9   0   1   43.80   20.90
   0   9   1   43.50   18.90
  -9   0   1   28.10   24.60
   0  -9   1  -12.30   17.60
   0   9  -1   -5.30   17.70
   0  -9  -1   11.50   18.90
  -9   0  -1   27.20   17.00
   9   0  -1    6.20   18.00
   0   9  -1    8.80   18.20
   9   0  -1    2.60   18.00
  -9   0  -1   47.20   20.20
   0  -9  -1   57.39   20.20
   9   1   1  143.59   27.40
  -1   9   1  110.89   27.00
   1  -9   1  161.18   27.70
   9   1   1  101.09   25.90
  -9  -1   1  108.49   32.70
  -1   9   1   96.49   22.80
  -9  -1   1  153.28   28.30
   1  -9  -1  106.89   25.60
  -1   9  -1  156.68   28.50
   9   1  -1  132.69   26.10
  -1   9  -1  126.09   25.10
  -9  -1  -1  182.88   28.30
   9   1  -1  126.19   26.00
  -9  -1  -1  178.38   29.00
  -2   9   1  465.05   49.60
  -9  -2   1  526.25   47.10
   9   2   1  468.65   46.10
   9   2   1  509.65   45.40
   2  -9   1  539.85   47.40
  -2   9   1  557.04   46.90
   2  -9   1  512.15   47.20
  -9  -2   1  441.16   42.20
  -2   9  -1  456.35   44.80
   2  -9  -1  534.15   45.60
   9   2  -1  599.84   48.30
   2  -9  -1  502.25   45.60
   9   2  -1  481.35   46.10
  -9  -2  -1  499.85   46.70
  -9  -2  -1  497.95   44.70
  -2   9  -1  462.55   43.30
  -9  -3   1  561.54   47.60
   9   3   1  665.33   50.39
  -9  -3   1  486.25   45.70
  -3   9   1  574.04   65.09
   3  -9   1  649.34   51.29
   3  -9   1  682.63   51.99
   9   3   1  622.24   52.49
  -3   9   1  618.44   48.80
   9   3  -1  509.75   48.80
  -9  -3  -1  664.43   50.49
   9   3  -1  646.84   51.39
   3  -9  -1  605.64   51.09
  -3   9  -1  646.34   50.49
  -9  -3  -1  634.34   50.79
   3  -9  -1  626.54   50.19
  -3   9  -1  640.24   49.20
   9   4   1  118.29   26.40
   4  -9   1  112.19   26.50
  -9  -4   1  118.89   24.70
  -9  -4   1  113.99   27.40
   9   4   1  143.29   27.30
  -4   9   1  111.79   23.50
  -4   9   1  194.88   30.20
   4  -9   1  139.49   27.70
  -4   9  -1  161.98   27.50
   9   4  -1  144.69   28.20
  -9  -4  -1  152.88   27.70
   9   4  -1  110.69   26.50
   4  -9  -1   79.59   24.60
  -9  -4  -1  164.18   29.30
   4  -9  -1  167.08   30.70
   5  -9   1   77.79   24.60
   9   5   1  105.99   25.60
  -5   9   1  128.79   25.20
   9   5   1  160.38   29.30
  -9  -5   1  120.29   24.90
   5  -9   1  105.89   25.50
  -9  -5   1   85.39   25.20
  -5   9  -1   68.89   22.20
  -9  -5  -1  120.19   28.30
  -9  -5  -1  120.99   27.40
   5  -9  -1  103.99   25.70
   5  -9  -1  118.89   26.30
   9   5  -1  129.89   28.40
   9   5  -1  131.89   27.90
   6  -9   1   84.09   26.10
  -9  -6   1  112.39   26.90
   9   6   1  146.79   29.80
   6  -9   1  117.79   27.50
   9   6   1  120.99   25.80
  -6   9   1  115.09   26.00
  -6   9   1   99.89   26.00
  -9  -6   1  103.49   27.30
  -9  -6  -1  163.38   30.90
   6  -9  -1  133.09   28.80
  -6   9  -1  115.99   26.20
  -9  -6  -1  143.89   29.60
   9   6  -1   94.19   26.50
   6  -9  -1   98.49   26.10
  -6   9  -1  105.79   25.30
   9   6  -1  105.39   26.40
   7  -9   1  139.99   30.60
  -7   9   1  124.39   26.50
   9   7   1  175.28   30.70
  -9  -7   1  204.58   33.20
   9   7   1  173.38   31.20
   7  -9   1  137.59   30.80
  -9  -7   1  187.48   33.10
  -7   9   1  143.79   28.30
   7  -9  -1  116.39   29.70
   7  -9  -1  147.09   30.40
  -7   9  -1  202.68   32.00
  -7   9  -1  152.58   29.30
   9   7  -1  180.68   33.30
  -9  -7  -1  136.09   30.30
  -9  -7  -1  136.29   30.30
   9   7  -1  179.88   32.50
   9   8   1    6.60   22.90
  -9  -8   1    2.70   21.60
   8  -9   1   -6.40   19.60
  -8   9   1    3.20   19.60
  -8   9   1   -0.50   15.80
   9   8   1    2.30   18.20
   8  -9   1   24.40   23.10
  -9  -8   1  -14.70   19.40
   9   8  -1   23.30   22.80
  -9  -8  -1   24.00   22.00
   8  -9  -1   22.80   23.50
   8  -9  -1  -15.90   18.40
  -9  -8  -1  -11.40   20.90
  -8   9  -1   17.00   18.90
  -8   9  -1    0.70   16.90
   9   8  -1  -10.30   19.40
  -9   9   1   19.10   19.00
  -9   9   1   13.50   19.00
   9  -9   1   17.00   23.20
   9  -9   1  -10.00   20.80
   9   9   1   32.20   22.00
  -9  -9   1   16.50   21.70
  -9  -9   1   13.60   21.80
   9   9   1   44.60   23.60
  -9  -9  -1    3.40   24.20
   9  -9  -1   17.40   20.70
  -9  -9  -1    3.30   21.10
   9  -9  -1   15.10   22.00
  -9   9  -1   21.10   18.00
   9   9  -1    6.20   22.60
  -9   9  -1   23.40   20.10
   9   9  -1   28.00   20.90
 -10   9   1    6.00   20.70
   9  10   1   13.10   31.80
  -9 -10   1   18.70   24.70
 -10   9   1   28.80   18.70
  10  -9   1   24.00   26.00
  -9 -10   1   -0.90   22.20
   9  10   1   31.60   22.30
  10  -9   1  -32.50   20.30
  -9 -10  -1   14.00   23.60
   9  10  -1   35.70   25.90
  -9 -10  -1    9.10   26.40
   9  10  -1   31.90   24.30
 -10   9  -1   -6.30   20.50
  10  -9  -1  -28.40   23.80
 -10   9  -1   46.40   21.40
  10  -9  -1  -11.20   22.90
  10  -8   1    9.20   22.30
 -10   8   1  -22.90   16.00
   8  10   1   12.30   21.10
   8  10   1   -0.50   19.50
 -10   8   1   -7.10   16.60
  -8 -10   1   20.90   22.30
  10  -8   1   -9.00   20.40
  -8 -10   1   25.90   23.30
  -8 -10  -1   18.70   23.00
  -8 -10  -1   35.80   26.20
   8  10  -1    4.60   22.40
 -10   8  -1    4.10   18.70
   8  10  -1   27.10   23.70
 -10   8  -1   -8.10   17.60
  10  -8  -1  -14.40   20.80
  10  -8  -1   12.10   22.50
   7  10   1   23.60   20.20
 -10   7   1   28.00   19.10
  -7 -10   1   27.20   22.20
   7  10   1    5.00   20.90
  -7 -10   1   45.90   24.30
  10  -7   1   40.20   23.80
 -10   7   1   39.10   21.50
  10  -7   1   29.00   24.40
   7  10  -1   29.00   21.70
  10  -7  -1    4.20   18.90
   7  10  -1    1.60   20.10
  -7 -10  -1    7.20   21.00
  10  -7  -1   33.90   27.50
  -7 -10  -1   62.49   28.60
 -10   7  -1   22.40   20.40
 -10   7  -1   41.30   21.60
  10  -6   1  125.19   28.70
  -6 -10   1  189.58   32.70
   6  10   1  114.89   29.40
 -10   6   1  137.29   30.70
   6  10   1  142.39   29.10
 -10   6   1  145.39   27.70
  -6 -10   1  143.79   30.40
  10  -6   1  119.69   29.80
  10  -6  -1  129.79   29.50
 -10   6  -1   87.49   23.70
  10  -6  -1  133.29   30.20
   6  10  -1  204.68   36.00
 -10   6  -1  136.89   30.20
  -6 -10  -1  179.28   32.80
  -6 -10  -1  162.28   31.60
   6  10  -1  207.78   34.80
   5  10   1  105.39   26.20
   5  10   1   64.09   22.30
 -10   5   1  107.89   25.60
  -5 -10   1   94.29   27.70
  10  -5   1   88.69   26.60
  10  -5   1   75.59   26.00
  -5 -10   1   49.30   24.60
 -10   5   1   57.79   21.40
 -10   5  -1   97.49   25.10
 -10   5  -1   80.99   24.50
  10  -5  -1   84.49   27.30
  -5 -10  -1   79.59   26.30
   5  10  -1   85.09   25.30
  -5 -10  -1   64.89   26.20
   5  10  -1  112.39   27.50
  10  -5  -1   74.29   25.90
  10  -4   1   36.80   21.00
 -10   4   1   37.50   18.90
 -10   4   1   37.20   21.40
   4  10   1   43.30   21.10
   4  10   1   31.90   21.70
  -4 -10   1   49.60   22.40
  10  -4   1   73.89   25.20
  -4 -10   1   54.29   23.10
   4  10  -1   73.39   23.80
   4  10  -1   51.29   22.80
  10  -4  -1   52.39   23.30
  10  -4  -1   38.70   24.60
 -10   4  -1   30.50   19.80
 -10   4  -1   59.09   21.70
  -4 -10  -1   12.90   22.30
  -4 -10  -1   45.80   22.20
 -10   3   1   36.70   18.30
   3  10   1   41.00   20.10
 -10   3   1   31.10   19.90
  -3 -10   1   21.10   18.10
   3  10   1   44.10   21.10
  -3 -10   1   13.80   20.50
  10  -3   1   21.30   20.60
  10  -3   1   23.80   19.50
  10  -3  -1   13.70   20.20
  -3 -10  -1   25.50   20.50
 -10   3  -1   47.20   20.30
 -10   3  -1   30.00   20.00
  10  -3  -1   -9.00   18.80
   3  10  -1    4.90   19.40
   3  10  -1   63.69   22.10
  -3 -10  -1   35.50   22.90
   2  10   1  133.59   26.00
  10  -2   1  109.99   24.70
 -10   2   1   81.99   21.10
  -2 -10   1   66.09   22.40
   2  10   1   81.09   23.50
  10  -2   1  122.09   28.70
  -2 -10   1   90.39   24.90
 -10   2   1  109.79   25.70
   2  10  -1  101.79   26.50
  -2 -10  -1   90.69   23.80
 -10   2  -1   94.19   23.70
  10  -2  -1   46.70   21.10
  10  -2  -1  107.89   25.50
   2  10  -1  137.49   28.20
  -2 -10  -1   66.99   24.00
 -10   2  -1  158.68   29.70
 -10   1   1   70.89   21.00
  10  -1   1   81.49   23.80
   1  10   1   78.49   23.50
  -1 -10   1   94.59   25.80
  10  -1   1   67.99   23.30
 -10   1   1  111.29   25.20
  -1 -10   1   60.99   23.10
   1  10   1   69.99   22.60
  10  -1  -1  113.59   27.20
  -1 -10  -1   77.89   24.70
  -1 -10  -1   83.09   25.00
 -10   1  -1   79.69   23.50
   1  10  -1  120.39   27.50
  10  -1  -1  102.09   24.80
   1  10  -1   92.49   25.50
 -10   1  -1   54.09   20.80
 -10   0   1  455.85   44.90
   0 -10   1  504.05   46.50
  10   0   1  540.65   49.70
  10   0   1  479.95   46.80
   0  10   1  473.25   45.40
 -10   0   1  512.65   45.50
   0  10   1  497.35   44.70
   0  10  -1  515.45   47.20
  10   0  -1  486.65   48.30
   0  10  -1  505.95   46.70
 -10   0  -1  493.25   46.90
 -10   0  -1  489.65   45.40
   0 -10  -1  439.56   45.40
   0 -10  -1  479.95   45.70
  10   0  -1  483.55   45.80
   1 -10   1   97.39   24.90
  -1  10   1  106.99   25.20
  10   1   1   53.39   21.10
  10   1   1   87.59   24.80
 -10  -1   1   98.19   24.40
  -1  10   1   95.89   25.20
 -10  -1   1   88.79   22.20
  10   1  -1  103.69   25.30
  -1  10  -1  117.19   26.80
 -10  -1  -1  115.39   25.90
  10   1  -1   65.79   21.90
   1 -10  -1   80.99   25.30
  -1  10  -1   87.59   25.00
 -10  -1  -1  103.99   25.10
 -10  -2   1  106.19   23.00
   2 -10   1   99.59   24.60
 -10  -2   1   47.70   22.50
  10   2   1  118.69   26.70
  -2  10   1   92.89   23.40
  -2  10   1   89.19   24.30
   2 -10   1   71.19   23.00
  10   2   1   67.69   21.30
 -10  -2  -1   91.49   26.20
  10   2  -1   75.59   24.10
  -2  10  -1  118.39   27.30
  -2  10  -1   64.29   22.50
  10   2  -1   80.99   24.20
 -10  -2  -1   65.99   22.80
   2 -10  -1   93.49   23.70
   2 -10  -1   92.69   24.30
  -3  10   1   24.20   20.20
 -10  -3   1   31.80   21.80
  10   3   1   34.10   21.20
 -10  -3   1   11.30   16.10
   3 -10   1   86.89   24.00
  10   3   1    6.30   20.00
  -3  10   1   46.30   20.20
   3 -10   1   13.00   21.30
 -10  -3  -1   48.20   22.90
  -3  10  -1   33.60   20.20
   3 -10  -1   41.90   21.70
  10   3  -1   38.90   22.80
  -3  10  -1   40.70   22.70
 -10  -3  -1   28.80   21.20
   3 -10  -1   22.10   22.40
  10   3  -1   41.70   23.70
 -10  -4   1   91.29   25.50
  10   4   1   43.70   20.20
  -4  10   1   19.90   19.50
   4 -10   1   75.39   25.60
   4 -10   1   17.10   20.50
  -4  10   1   62.79   22.10
 -10  -4   1   58.29   19.80
  10   4   1   62.69   23.40
 -10  -4  -1   75.59   24.50
 -10  -4  -1   36.50   22.00
  -4  10  -1   48.40   22.60
  10   4  -1   16.50   22.80
  -4  10  -1  118.59   24.50
  10   4  -1   40.40   21.30
   4 -10  -1   28.20   22.20
   4 -10  -1   51.59   22.50
  10   5   1   88.99   25.40
  10   5   1  157.88   28.90
  -5  10   1   84.09   22.20
 -10  -5   1  116.89   26.50
 -10  -5   1   97.59   27.00
   5 -10   1   86.99   26.20
   5 -10   1   93.39   25.10
  -5  10   1  128.69   26.80
 -10  -5  -1  108.99   28.50
   5 -10  -1   64.49   24.90
  10   5  -1  116.09   29.00
  10   5  -1   70.89   24.00
  -5  10  -1   84.09   23.30
   5 -10  -1   53.89   25.00
 -10  -5  -1   77.89   25.70
 -10  -6   1  145.59   27.00
  10   6   1  151.98   29.30
  -6  10   1  177.58   29.90
   6 -10   1  130.19   28.70
   6 -10   1  175.28   31.20
 -10  -6   1  123.49   28.80
  10   6   1  188.08   33.00
 -10  -6  -1  169.78   32.50
  10   6  -1  166.38   31.50
 -10  -6  -1  155.68   31.10
   6 -10  -1  172.48   31.80
   6 -10  -1  163.28   31.10
  10   6  -1  182.78   34.00
  -6  10  -1  116.09   26.40
  10   7   1   51.99   24.80
 -10  -7   1   72.09   25.20
  -7  10   1   19.20   17.90
   7 -10   1   39.80   24.10
 -10  -7   1   13.70   23.80
   7 -10   1   41.10   23.90
  -7  10   1    9.80   19.00
  10   7   1   55.89   23.10
 -10  -7  -1   10.20   19.70
  10   7  -1   21.80   21.80
 -10  -7  -1   -9.10   21.40
  10   7  -1  -10.70   20.10
  -7  10  -1   11.90   18.20
  -7  10  -1   48.00   22.60
   7 -10  -1   45.10   21.40
   7 -10  -1   41.00   27.40
 -10  -8   1   41.00   23.00
  10   8   1  -10.40   18.20
   8 -10   1    3.30   20.80
  -8  10   1   29.10   21.70
   8 -10   1   21.80   23.30
 -10  -8   1   25.00   22.50
  10   8   1   50.49   24.00
  -8  10   1   10.40   18.00
  -8  10  -1   -8.50   17.30
 -10  -8  -1   -2.30   23.10
  -8  10  -1   38.70   19.90
  10   8  -1   39.30   22.30
 -10  -8  -1   21.90   20.90
  10   8  -1    3.40   21.30
   8 -10  -1   14.00   21.40
   8 -10  -1   12.80   23.00
   9 -10   1    4.50   23.40
  -9  10   1    9.20   20.50
  -9  10   1   25.00   19.30
  10   9   1   19.20   21.60
   9 -10   1   17.60   25.20
 -10  -9   1    6.60   24.10
 -10  -9   1   34.70   24.50
  10   9  -1   15.90   25.10
   9 -10  -1    2.60   23.90
   9 -10  -1   12.10   26.80
  -9  10  -1   17.70   19.20
 -10  -9  -1   17.30   26.40
  10   9  -1   -5.60   21.60
 -10  -9  -1   18.10   24.30
  -9  10  -1   -8.80   20.30
  10  10   1   94.89   31.10
  10  10   1   73.19   28.10
  10 -10   1   39.60   45.00
 -10 -10   1  162.88   36.10
 -10  10   1   94.09   28.80
 -10 -10   1   70.09   30.70
  10 -10   1  113.99   36.40
 -10  10   1   82.19   25.10
 -10  10  -1  116.29   30.50
  10  10  -1   83.79   29.10
  10 -10  -1   91.89   32.80
 -10  10  -1  104.79   29.40
 -10 -10  -1   87.79   33.40
 -10 -10  -1   70.69   30.80
  10 -10  -1   66.19   29.40
  10  10  -1   79.39   31.40
  11 -10   1   37.60   31.70
 -10 -11   1  159.78   35.40
  10  11   1  168.88   37.70
 -11  10   1  114.99   29.80
  11 -10   1   76.99   31.20
  10  11   1  130.39   34.40
 -11  10   1  158.78   34.00
 -10 -11   1  167.08   38.30
  11 -10  -1  112.79   34.90
 -11  10  -1   91.59   27.20
 -10 -11  -1  164.88   36.80
  11 -10  -1  121.39   44.80
  10  11  -1   97.49   31.40
 -10 -11  -1  124.69   43.90
 -11  10  -1   97.79   30.70
  10  11  -1  109.89   34.20
   9  11   1   41.60   26.90
 -11   9   1   25.30   20.20
  -9 -11   1   45.70   29.10
 -11   9   1   -6.80   18.30
  11  -9   1    2.90   29.80
  11  -9   1   -0.60   28.00
  -9 -11   1   56.49   28.10
   9  11   1   -5.20   21.10
 -11   9  -1   28.30   23.30
   9  11  -1   28.70   25.00
  11  -9  -1   -5.30   25.10
 -11   9  -1  -28.50   16.80
  -9 -11  -1   32.20   27.80
  -9 -11  -1  -44.70   23.90
  11  -9  -1   -7.20   26.80
   9  11  -1   21.00   26.50
  11  -8   1   -8.20   24.10
   8  11   1   48.40   23.70
 -11   8   1   39.70   23.60
   8  11   1   29.20   26.30
  -8 -11   1   23.40   24.70
  -8 -11   1   57.39   27.80
  11  -8   1   43.70   26.80
 -11   8   1   27.70   20.00
   8  11  -1   37.30   25.90
  -8 -11  -1    3.50   21.90
 -11   8  -1   52.69   26.50
  11  -8  -1   32.10   25.40
  -8 -11  -1   36.90   28.60
 -11   8  -1    3.20   17.00
  11  -8  -1   20.10   29.60
   8  11  -1   66.09   27.90
  11  -7   1  -18.20   23.90
  -7 -11   1   50.79   26.90
 -11   7   1    5.50   17.40
  11  -7   1   20.90   23.30
  -7 -11   1    1.00   23.40
 -11   7   1   33.60   34.00
   7  11   1   19.70   27.50
   7  11   1   81.49   26.80
 -11   7  -1   42.40   25.80
  11  -7  -1    4.40   25.60
  -7 -11  -1  -16.80   24.90
  11  -7  -1   52.49   24.50
  -7 -11  -1   61.09   27.10
   7  11  -1   61.69   29.00
   7  11  -1   37.40   24.20
 -11   7  -1   30.50   22.80
  -6 -11   1   86.59   27.10
  11  -6   1   11.10   22.40
 -11   6   1   57.89   22.80
 -11   6   1   40.40   19.50
  11  -6   1   59.09   25.60
   6  11   1   84.49   26.30
   6  11   1   39.10   21.30
  -6 -11   1   38.20   24.30
  11  -6  -1   69.99   30.30
 -11   6  -1   28.80   20.30
  11  -6  -1   63.09   24.70
  -6 -11  -1   35.60   26.50
   6  11  -1   33.40   24.30
   6  11  -1   80.49   26.90
  -6 -11  -1   47.30   22.40
 -11   6  -1   36.80   22.40
 -11   5   1    4.30   18.50
  11  -5   1   27.90   22.50
 -11   5   1   65.99   21.50
   5  11   1   13.70   21.90
  -5 -11   1   34.90   24.10
  11  -5   1    5.80   21.30
   5  11   1   19.20   18.00
  -5 -11   1   30.20   21.40
   5  11  -1   46.70   22.90
  -5 -11  -1   -7.30   19.10
   5  11  -1   10.90   20.40
 -11   5  -1   47.10   22.30
  -5 -11  -1   18.20   24.80
 -11   5  -1   51.29   21.30
  11  -5  -1   44.80   24.20
  11  -5  -1    0.70   22.60
   4  11   1   95.29   25.10
  -4 -11   1  128.99   30.30
 -11   4   1  100.89   24.50
   4  11   1   83.89   28.70
  11  -4   1  114.99   27.70
 -11   4   1   85.09   27.50
  11  -4   1   91.09   28.40
  -4 -11   1   80.89   24.90
  -4 -11  -1   56.89   24.70
   4  11  -1  127.59   30.10
 -11   4  -1  109.09   25.00
   4  11  -1   82.29   26.50
  -4 -11  -1   71.69   26.70
  11  -4  -1   85.19   25.50
  11  -4  -1   80.19   27.10
 -11   4  -1  100.19   26.80
  -3 -11   1   16.70   21.00
   3  11   1   23.00   18.80
   3  11   1   12.70   19.50
 -11   3   1    5.70   18.80
 -11   3   1    0.70   13.90
  11  -3   1   -1.60   18.80
  -3 -11   1   53.49   23.80
  11  -3   1   15.90   21.80
  11  -3  -1    0.30   19.50
 -11   3  -1   22.80   19.40
  -3 -11  -1    2.30   20.30
   3  11  -1   30.80   21.30
  -3 -11  -1   17.70   21.50
  11  -3  -1    4.20   21.50
   3  11  -1   15.20   21.30
 -11   3  -1  -13.50   17.20
 -11   2   1   34.20   21.40
  -2 -11   1   -9.60   21.00
  11  -2   1   17.60   22.20
  11  -2   1   18.40   20.10
 -11   2   1   19.40   17.10
   2  11   1   28.10   19.00
  -2 -11   1   29.00   21.70
   2  11   1   26.50   19.70
  -2 -11  -1   42.30   24.60
  11  -2  -1   34.90   22.30
 -11   2  -1    6.90   20.30
   2  11  -1    2.60   19.50
  -2 -11  -1   18.50   22.70
 -11   2  -1   32.00   21.30
  11  -2  -1    7.90   23.80
   2  11  -1   13.70   21.20
  11  -1   1   33.40   21.60
  11  -1   1   28.90   20.90
 -11   1   1   17.20   17.50
  -1 -11   1   11.10   19.30
  -1 -11   1   33.40   23.00
 -11   1   1   16.80   20.00
   1  11   1   57.39   22.70
   1  11   1   14.90   19.90
  11  -1  -1    6.20   20.30
 -11   1  -1   -1.00   18.20
  11  -1  -1    4.50   20.80
  -1 -11  -1   19.10   23.10
   1  11  -1    5.40   18.00
   1  11  -1    1.70   17.00
  -1 -11  -1   31.10   23.20
 -11   1  -1   15.60   19.50
   0 -11   1   15.20   20.40
 -11   0   1   42.90   23.50
   0  11   1   49.10   21.50
   0  11   1   -1.30   19.00
  11   0   1   15.10   19.90
 -11   0   1   22.10   16.40
  11   0   1   36.70   21.00
 -11   0  -1   33.00   22.40
   0  11  -1   42.60   21.50
  11   0  -1    1.90   18.90
  11   0  -1   21.70   22.30
 -11   0  -1   46.70   22.80
   0 -11  -1   -4.10   21.60
   0 -11  -1   60.49   23.80
   0  11  -1   61.29   22.00
  -1  11   1   28.50   20.40
   1 -11   1   12.00   19.40
  11   1   1    5.40   20.30
  11   1   1    0.40   17.10
 -11  -1   1   16.60   16.20
   1 -11   1   -6.30   20.00
  -1  11   1    3.50   18.40
 -11  -1   1    2.90   19.60
   1 -11  -1   41.50   24.10
  11   1  -1    9.70   20.50
 -11  -1  -1   23.00   20.50
 -11  -1  -1   10.70   19.60
  11   1  -1   53.69   24.50
  -1  11  -1   15.50   18.40
  -1  11  -1   -0.70   18.50
 -11  -2   1   40.70   21.60
  11   2   1   24.20   21.00
  11   2   1   38.60   21.80
   2 -11   1    6.90   21.90
  -2  11   1   16.20   18.20
  -2  11   1   21.90   17.00
   2 -11   1   18.60   20.30
 -11  -2   1   26.20   17.00
  -2  11  -1   34.70   19.50
 -11  -2  -1   15.70   20.20
  11   2  -1   19.70   20.60
   2 -11  -1   24.80   21.20
   2 -11  -1   51.79   25.10
  11   2  -1   18.30   22.00
  -2  11  -1  -11.70   19.40
 -11  -2  -1   39.90   23.60
   3 -11   1   16.70   21.80
  -3  11   1   20.70   21.60
 -11  -3   1    5.40   17.40
  -3  11   1   16.80   18.30
  11   3   1   52.39   25.30
   3 -11   1   22.10   23.00
  11   3   1   33.00   21.60
 -11  -3   1   34.50   21.10
  -3  11  -1   12.50   19.70
  -3  11  -1   18.10   20.40
 -11  -3  -1   25.60   21.00
  11   3  -1   -2.80   21.30
 -11  -3  -1   35.40   21.90
   3 -11  -1    8.10   20.10
   3 -11  -1   35.60   23.10
  11   3  -1    2.90   22.40
  11   4   1  103.89   26.00
 -11  -4   1  115.59   27.80
   4 -11   1   95.79   26.20
  -4  11   1   85.69   23.00
  -4  11   1   99.99   28.30
   4 -11   1   76.69   25.30
 -11  -4   1  113.99   24.80
  11   4   1   98.19   26.50
  -4  11  -1  156.58   29.50
   4 -11  -1   82.59   27.00
   4 -11  -1   91.29   27.50
 -11  -4  -1   75.49   25.70
 -11  -4  -1  127.59   29.80
  -4  11  -1   97.89   29.10
  11   4  -1  105.29   29.20
  11   4  -1   83.49   27.10
   5 -11   1   44.90   25.00
 -11  -5   1   22.60   24.50
   5 -11   1   28.10   21.50
  11   5   1    6.80   20.90
  -5  11   1   67.89   25.60
 -11  -5   1   14.10   18.80
  11   5   1   24.90   22.60
  -5  11   1   35.60   18.90
   5 -11  -1   47.10   24.20
   5 -11  -1   64.29   26.30
 -11  -5  -1   44.30   25.60
  -5  11  -1   11.60   20.10
  11   5  -1   25.90   23.00
 -11  -5  -1   44.40   23.80
  11   5  -1   25.50   23.80
  -5  11  -1   14.10   20.00
  11   6   1   73.69   24.50
  -6  11   1   43.30   19.60
   6 -11   1   58.39   25.00
 -11  -6   1   34.60   23.70
 -11  -6   1   24.10   19.30
   6 -11   1   78.49   25.00
  11   6   1   58.59   25.10
  -6  11   1   85.99   28.00
  11   6  -1   50.39   23.30
   6 -11  -1   50.39   26.90
   6 -11  -1   31.80   26.50
 -11  -6  -1   77.59   25.50
  11   6  -1   47.20   25.60
  -6  11  -1   33.00   20.90
 -11  -6  -1   69.19   27.40
  -7  11   1   27.80   20.20
 -11  -7   1   53.09   24.20
 -11  -7   1   33.30   23.80
  11   7   1   50.59   23.50
   7 -11   1    5.80   22.70
  11   7   1   34.70   26.20
   7 -11   1   36.00   23.60
 -11  -7  -1   41.20   26.70
  11   7  -1   40.20   25.30
 -11  -7  -1   40.30   23.70
   7 -11  -1   10.60   22.40
  -7  11  -1   71.69   26.90
   7 -11  -1   12.90   24.70
  11   7  -1   52.99   26.40
  11   8   1  -18.80   29.00
  -8  11   1   19.90   18.70
 -11  -8   1   75.39   37.50
   8 -11   1   14.20   23.80
  11   8   1   28.90   23.70
   8 -11   1   64.09   28.10
 -11  -8   1    8.50   23.70
  11   8  -1   63.49   26.00
 -11  -8  -1   31.40   23.90
 -11  -8  -1   -7.00   24.80
  -8  11  -1   20.70   22.40
   8 -11  -1    3.40   27.80
   8 -11  -1    6.30   23.80
  -8  11  -1   36.30   20.60
  11   8  -1   54.09   29.40
  -9  11   1    4.20   18.60
 -11  -9   1  -10.20   23.90
   9 -11   1   31.10   29.50
   9 -11   1   11.20   44.30
  11   9   1   10.30   23.50
  -9  11   1   26.30   23.50
 -11  -9   1   30.00   26.10
  11   9   1   27.60   26.70
  -9  11  -1   34.70   24.70
  -9  11  -1   51.09   24.70
  11   9  -1   51.39   29.60
 -11  -9  -1    3.50   24.90
   9 -11  -1   32.90   26.60
 -11  -9  -1   39.10   28.40
   9 -11  -1   15.70   29.20
  11   9  -1   28.50   25.30
 -10  11   1   74.59   28.00
  11  10   1  130.09   36.30
 -11 -10   1  134.19   34.70
  10 -11   1  117.19   33.40
  11  10   1   67.69   30.20
 -10  11   1  153.48   33.40
 -11 -10   1   69.09   31.50
  10 -11   1   79.59   34.80
  11  10  -1  132.79   35.50
 -11 -10  -1  111.69   33.60
  11  10  -1  115.99   34.10
  10 -11  -1  122.89   34.40
 -10  11  -1  141.59   31.30
 -11 -10  -1   90.89   39.10
 -10  11  -1  160.78   35.00
  10 -11  -1   96.79   42.50
  11  11   1   39.90   30.60
  11 -11   1   22.40   31.50
  11 -11   1   60.49   38.90
  11  11   1   56.29   28.20
 -11 -11   1   33.50   34.00
 -11  11   1   73.79   27.50
 -11 -11   1   86.39   33.90
 -11  11   1   45.10   23.30
  11  11  -1   73.19   33.10
  11 -11  -1   64.79   34.30
 -11 -11  -1   37.80   32.60
  11  11  -1   21.30   35.40
 -11 -11  -1   87.29   35.40
 -11  11  -1   78.89   29.10
  11 -11  -1   40.50   35.10
  12 -11   1   78.79   34.00
  11  12   1   13.70   30.00
 -11 -12   1   50.99   30.40
 -12  11   1   36.30   26.20
  11  12   1   39.30   31.10
  12 -11   1   32.80   35.40
 -11 -12   1   31.20   33.40
 -12  11   1   -1.30   23.80
 -12  11  -1   25.20   25.20
 -11 -12  -1   20.90   33.20
  11  12  -1   39.30   34.40
  12 -11  -1   23.90   30.90
  11  12  -1   28.20   33.10
 -12  11  -1   57.69   36.00
 -11 -12  -1   70.59   34.30
  12 -11  -1   31.50   36.10
  10  12   1   98.79   32.10
  10  12   1   89.49   32.60
 -10 -12   1  148.59   41.00
  12 -10   1  115.19   38.00
 -10 -12   1   92.59   35.20
 -12  10   1   74.19   26.30
  12 -10   1   64.39   36.80
 -12  10   1   82.09   27.20
  12 -10  -1   21.10   30.40
  10  12  -1   97.69   34.80
  10  12  -1   81.19   40.30
 -10 -12  -1  139.79   37.60
 -12  10  -1  128.59   32.80
 -10 -12  -1  102.59   36.80
  12 -10  -1  107.89   40.10
   9  12   1   65.29   30.40
  -9 -12   1   57.39   32.30
 -12   9   1   48.00   24.90
   9  12   1   41.00   28.10
  12  -9   1   54.79   33.20
 -12   9   1   29.40   22.40
  -9 -12   1   75.39   28.80
  12  -9   1   12.80   23.10
  -9 -12  -1   55.89   29.40
 -12   9  -1   31.70   24.70
   9  12  -1   31.50   27.70
  12  -9  -1  -11.00   26.70
  -9 -12  -1   34.20   45.60
   9  12  -1   66.89   31.70
  12  -9  -1   54.89   38.20
 -12   9  -1   59.59   28.10
 -12   8   1  101.89   28.30
  -8 -12   1  155.08   37.30
  -8 -12   1   90.69   30.50
   8  12   1   57.09   28.20
  12  -8   1   99.09   32.70
  12  -8   1    6.70   29.50
 -12   8   1   74.79   24.60
   8  12   1   90.49   30.10
  -8 -12  -1  109.89   36.40
   8  12  -1   62.69   31.60
  -8 -12  -1  127.99   32.30
  12  -8  -1   94.89   27.50
 -12   8  -1   83.69   27.70
  12  -8  -1  102.39   37.20
   8  12  -1  111.09   33.30
 -12   8  -1   95.99   27.40
  12  -7   1   87.59   31.80
   7  12   1   54.49   27.20
  -7 -12   1   48.30   29.90
   7  12   1   61.59   26.80
 -12   7   1   20.60   20.70
  12  -7   1   49.90   39.40
 -12   7   1   42.80   25.20
  -7 -12  -1   44.10   28.00
  12  -7  -1   34.30   30.30
  12  -7  -1   32.40   26.00
   7  12  -1   46.70   28.00
   7  12  -1   42.20   27.60
 -12   7  -1   37.20   23.30
  -7 -12  -1   90.09   32.90
 -12   7  -1   79.69   28.20
  12  -6   1   33.10   25.70
  12  -6   1   52.09   25.60
 -12   6   1   23.60   23.10
   6  12   1    6.20   22.10
 -12   6   1   46.30   20.40
   6  12   1    7.40   19.70
  -6 -12   1   -9.70   22.40
  -6 -12   1   -1.40   22.10
  12  -6  -1  -30.40   19.30
 -12   6  -1   47.60   20.80
  12  -6  -1   20.20   28.50
   6  12  -1    3.10   21.40
   6  12  -1  -10.80   18.10
  -6 -12  -1   21.60   22.80
  -6 -12  -1   14.90   27.70
 -12   6  -1   28.40   23.60
  -5 -12   1  128.39   32.00
  -5 -12   1  136.09   32.40
   5  12   1  147.99   30.90
  12  -5   1  183.88   35.50
 -12   5   1  205.48   35.60
  12  -5   1  140.09   31.60
 -12   5   1  162.28   30.10
   5  12   1  202.68   41.60
 -12   5  -1  151.18   33.20
  -5 -12  -1  118.39   30.00
  12  -5  -1  139.39   33.70
  12  -5  -1  134.59   31.90
   5  12  -1  114.59   31.90
  -5 -12  -1  136.99   33.70
 -12   5  -1  137.09   29.70
   5  12  -1  199.48   35.80
   4  12   1   65.99   26.30
  12  -4   1   32.90   24.10
   4  12   1   31.00   21.20
  12  -4   1   39.90   24.80
 -12   4   1   34.40   22.60
  -4 -12   1   19.00   22.50
 -12   4   1   36.20   19.80
 -12   4  -1   31.50   20.70
  12  -4  -1    6.50   18.90
  12  -4  -1    1.10   22.30
  -4 -12  -1   -0.50   22.70
   4  12  -1   11.80   21.70
   4  12  -1   13.60   21.90
 -12   4  -1   37.50   23.20
  -4 -12  -1   10.40   19.40
  12  -3   1   -8.10   20.80
 -12   3   1  -12.60   16.30
  -3 -12   1   19.30   22.60
  -3 -12   1  -29.50   18.00
   3  12   1  -11.00   18.00
  12  -3   1  -11.70   20.30
 -12   3   1  -10.00   16.80
   3  12   1   18.60   21.30
  -3 -12  -1   22.10   21.50
 -12   3  -1   23.70   21.60
   3  12  -1  -27.20   17.50
  12  -3  -1   18.70   20.10
  12  -3  -1    9.00   22.00
 -12   3  -1   -8.60   17.50
  -3 -12  -1  -43.00   19.90
   3  12  -1  -16.90   18.60
  12  -2   1   32.40   23.10
  -2 -12   1   30.30   22.50
  -2 -12   1   -5.30   20.90
   2  12   1   24.00   20.10
  12  -2   1   27.00   24.60
 -12   2   1   34.70   21.80
 -12   2   1   32.60   18.20
   2  12   1   48.00   24.60
   2  12  -1   64.89   24.40
  12  -2  -1   78.39   25.80
   2  12  -1   14.50   21.70
  -2 -12  -1   25.50   24.80
 -12   2  -1   20.30   21.70
 -12   2  -1   31.00   21.70
  12  -2  -1   33.00   27.40
  -2 -12  -1   -7.80   19.50
  12  -1   1   26.50   23.20
  12  -1   1   31.20   24.40
  -1 -12   1  -23.70   17.40
  -1 -12   1   33.80   23.90
   1  12   1   19.50   17.00
 -12   1   1   22.40   15.30
 -12   1   1   14.10   21.20
   1  12   1   41.60   24.00
  -1 -12  -1   41.50   23.00
   1  12  -1   39.20   22.40
   1  12  -1   46.40   22.90
  -1 -12  -1   54.79   25.50
  12  -1  -1   22.10   21.10
  12  -1  -1   54.89   25.30
 -12   1  -1   27.90   23.10
 -12   1  -1   32.90   21.60
   0  12   1   13.00   17.60
   0  12   1  -34.20   17.00
   0 -12   1  -23.70   20.30
 -12   0   1  -12.60   16.50
 -12   0   1    2.70   20.00
  12   0   1    4.20   20.00
  12   0   1   40.10   23.40
 -12   0  -1  -23.00   16.10
   0 -12  -1  -24.20   18.90
   0  12  -1  -10.10   18.70
  12   0  -1   -7.90   20.00
 -12   0  -1   38.90   22.90
   0  12  -1   -7.60   18.10
  12   0  -1   39.80   25.50
  -1  12   1   47.70   23.90
  12   1   1   34.30   25.20
 -12  -1   1   12.80   22.90
 -12  -1   1   10.90   17.80
   1 -12   1   48.10   23.40
  -1  12   1   50.69   20.40
  12   1   1   17.90   23.20
   1 -12   1   47.50   25.00
  12   1  -1   14.00   24.40
  -1  12  -1   20.30   20.70
 -12  -1  -1   41.60   24.60
  -1  12  -1   46.70   22.60
 -12  -1  -1   -3.20   19.40
  12   1  -1  -13.10   18.50
   1 -12  -1   72.59   26.80
  12   2   1   30.90   22.30
   2 -12   1   23.90   21.50
  12   2   1   28.10   24.00
  -2  12   1    3.30   16.00
   2 -12   1   53.09   23.60
 -12  -2   1   49.60   25.40
 -12  -2   1   15.50   17.20
  -2  12   1    1.30   21.10
  -2  12  -1   51.39   23.20
 -12  -2  -1   11.90   21.20
  -2  12  -1   40.10   22.40
   2 -12  -1    8.30   18.00
   2 -12  -1   14.20   23.10
 -12  -2  -1   27.10   23.30
  12   2  -1   48.00   20.50
  12   2  -1   17.00   22.10
 -12  -3   1  -13.20   14.70
   3 -12   1   -6.90   19.00
  12   3   1   -1.20   19.70
  12   3   1   22.10   21.60
  -3  12   1    6.70   22.30
  -3  12   1   -0.80   17.10
 -12  -3   1   30.10   22.50
   3 -12   1   45.40   23.70
  -3  12  -1   19.20   21.00
  -3  12  -1   -6.90   19.30
 -12  -3  -1   23.60   21.00
  12   3  -1   17.90   24.10
   3 -12  -1  -15.00   16.80
  12   3  -1   38.20   21.80
   3 -12  -1    5.80   23.80
 -12  -3  -1   14.30   22.20
  12   4   1   82.69   26.00
   4 -12   1   41.30   24.00
  -4  12   1   44.40   21.00
 -12  -4   1   45.80   23.60
   4 -12   1   64.69   25.80
  12   4   1   58.79   24.60
 -12  -4   1   12.10   15.80
  -4  12   1   11.80   23.20
 -12  -4  -1   26.50   23.30
  12   4  -1   11.70   24.50
  12   4  -1   40.70   24.80
 -12  -4  -1   36.40   24.50
  -4  12  -1    6.90   21.30
   4 -12  -1    0.70   21.10
  -4  12  -1   36.70   21.30
   4 -12  -1   26.00   25.90
  -5  12   1  126.39   51.19
   5 -12   1  211.98   36.80
 -12  -5   1  206.28   35.60
  -5  12   1  178.28   31.20
   5 -12   1  138.59   31.50
  12   5   1  165.98   32.20
 -12  -5   1  163.38   29.10
  12   5   1  180.48   35.10
  12   5  -1  120.99   32.20
   5 -12  -1  148.49   31.90
 -12  -5  -1  225.68   36.70
  -5  12  -1  227.28   37.70
   5 -12  -1  193.88   37.00
  -5  12  -1  220.98   38.20
 -12  -5  -1  206.28   35.80
  12   5  -1  173.58   33.30
  -6  12   1   81.69   28.10
  -6  12   1   31.80   22.00
 -12  -6   1    5.40   17.50
  12   6   1   40.40   30.40
   6 -12   1   29.50   24.90
 -12  -6   1   49.99   29.00
   6 -12   1   18.90   23.10
  12   6   1   29.80   24.30
  12   6  -1   41.40   26.10
   6 -12  -1   46.00   28.30
  -6  12  -1   63.09   26.60
 -12  -6  -1   45.10   28.00
   6 -12  -1   35.60   27.10
  12   6  -1   80.99   29.70
  -6  12  -1   23.00   23.00
 -12  -6  -1   46.60   25.10
 -12  -7   1   11.70   28.00
   7 -12   1   44.00   29.30
   7 -12   1   52.19   30.20
  12   7   1   58.79   27.80
  12   7   1   33.20   25.60
 -12  -7   1   36.90   28.80
  -7  12   1   42.10   21.80
 -12  -7  -1   18.20   27.60
   7 -12  -1   -4.30   26.50
  -7  12  -1   16.40   22.90
   7 -12  -1   55.49   30.10
  12   7  -1   46.50   25.30
  12   7  -1   66.99   30.70
 -12  -7  -1    4.40   23.90
 -12  -8   1   74.49   31.80
 -12  -8   1   31.30   28.30
  12   8   1   73.39   27.60
   8 -12   1   78.69   30.30
  12   8   1  113.69   32.60
   8 -12   1   84.19   34.40
  -8  12   1   81.79   26.70
   8 -12  -1   73.59   37.60
  12   8  -1   78.89   32.40
 -12  -8  -1    7.20   29.10
  12   8  -1   54.79   30.90
  -8  12  -1   50.09   25.30
   8 -12  -1   29.40   25.30
 -12  -8  -1   91.69   30.70
  -9  12   1   47.40   25.40
  12   9   1   67.49   32.30
   9 -12   1   45.90   33.20
   9 -12   1   25.70   26.90
 -12  -9   1   48.70   31.00
  12   9   1   68.59   30.70
 -12  -9   1   30.60   27.20
  -9  12  -1   64.49   28.30
   9 -12  -1   80.89   36.20
 -12  -9  -1   72.59   39.00
 -12  -9  -1   65.89   30.70
  12   9  -1   13.40   26.70
  12   9  -1   92.29   34.20
  -9  12  -1   43.30   23.10
   9 -12  -1   27.60   28.10
  10 -12   1   49.10   35.80
 -12 -10   1  122.79   35.70
  10 -12   1   92.39   36.00
  12  10   1   92.59   31.00
 -10  12   1   52.19   25.40
  12  10   1  121.79   35.00
 -12 -10   1  101.09   38.60
 -10  12   1  106.89   29.50
  10 -12  -1  102.59   37.50
  12  10  -1  164.48   38.30
 -12 -10  -1  114.19   35.60
 -10  12  -1   94.79   31.50
 -12 -10  -1  151.38   38.30
  10 -12  -1  106.89   35.60
 -12 -11   1   55.89   32.30
  12  11   1   45.50   31.40
 -12 -11   1   74.59   29.60
  12  11   1   23.30   31.00
  11 -12   1   30.00   28.40
 -11  12   1   -4.90   23.70
  11 -12   1   27.50   35.70
 -11  12   1   19.00   23.80
  11 -12  -1   37.60   31.70
 -12 -11  -1    2.10   30.50
 -11  12  -1  -16.10   27.90
  11 -12  -1   58.59   35.50
  12  11  -1    0.20   31.60
 -12 -11  -1   39.30   32.10
 -11  12  -1   43.80   28.20
  12  11  -1   46.40   32.90
 -12 -12   1   14.00   33.10
  12  12   1   12.30   30.20
 -12 -12   1   30.20   27.80
  12 -12   1    3.70   29.00
  12 -12   1  -68.59   31.00
  12  12   1  -23.30   27.00
 -12  12   1    4.50   21.10
 -12  12   1   -2.00   21.10
 -12  12  -1  -16.00   22.00
  12  12  -1   25.80   33.20
 -12 -12  -1   -0.50   29.40
  12 -12  -1   30.80   58.19
 -12 -12  -1  -21.70   31.60
 -12  12  -1  -11.80   24.20
  12 -12  -1   15.80   36.80
  12  12  -1  -47.40   26.10
 -12 -13   1   54.49   35.50
 -13  12   1   19.60   25.40
  12  13   1   27.70   29.60
  12  13   1   -2.30   27.70
  13 -12   1  -15.10   29.00
 -12 -13   1    4.90   34.90
 -13  12   1   10.30   23.40
  13 -12   1   -1.90   42.10
 -12 -13  -1   -1.80   32.60
 -12 -13  -1   10.80   31.60
 -13  12  -1   61.69   32.10
 -13  12  -1   25.50   26.40
  13 -12  -1   23.00   37.50
  13 -12  -1   13.30   34.50
  12  13  -1    6.30   31.90
  12  13  -1   48.70   37.80
 -11 -13   1   68.79   34.10
 -13  11   1   56.49   28.80
  11  13   1   72.19   32.70
  13 -11   1   -1.60   35.30
 -11 -13   1   59.69   36.30
 -13  11   1   43.00   24.90
  13 -11   1   27.80   31.90
  11  13   1   50.09   31.60
 -13  11  -1   45.40   30.30
  13 -11  -1   23.10   46.70
 -11 -13  -1   58.09   36.10
  11  13  -1   66.79   34.10
 -13  11  -1   42.00   28.00
  13 -11  -1   90.79   39.50
 -11 -13  -1   30.50   31.30
  11  13  -1   51.19   34.20
  13 -10   1  -40.60   31.30
  13 -10   1   67.19   31.00
 -13  10   1    5.40   24.70
 -10 -13   1    4.20   30.60
 -13  10   1   38.50   25.40
  10  13   1    4.30   29.60
 -10 -13   1   40.90   29.70
  10  13   1   60.69   31.90
  10  13  -1   51.19   30.50
 -13  10  -1   17.40   25.20
  13 -10  -1  -35.80   27.00
  13 -10  -1   33.40   34.20
 -13  10  -1  112.49   35.70
 -10 -13  -1   41.40   32.50
  10  13  -1   29.50   30.20
 -10 -13  -1   68.79   39.10
  -9 -13   1   66.79   29.30
  -9 -13   1   60.79   33.40
  13  -9   1   31.50   34.10
   9  13   1   73.19   30.80
  13  -9   1  -25.10   26.90
 -13   9   1   47.10   25.40
   9  13   1   72.19   33.10
 -13   9   1   19.50   24.00
 -13   9  -1   32.00   28.20
  -9 -13  -1   29.50   32.10
  13  -9  -1   30.70   32.60
  -9 -13  -1   58.39   32.50
 -13   9  -1   11.60   26.60
  13  -9  -1    8.90   33.60
   8  13   1   73.89   29.80
   8  13   1   18.40   25.30
  -8 -13   1   30.60   29.50
  13  -8   1    2.30   30.10
 -13   8   1   62.59   27.60
  -8 -13   1    1.60   30.10
  13  -8   1   14.40   29.30
 -13   8   1   33.00   23.70
  13  -8  -1   79.29   33.90
  -8 -13  -1   19.70   30.60
   8  13  -1   30.10   28.20
  -8 -13  -1   48.70   31.20
  13  -8  -1   32.60   32.90
   8  13  -1   36.40   30.90
 -13   8  -1    2.80   25.40
 -13   8  -1   12.00   23.20
   7  13   1   54.99   26.30
 -13   7   1   37.60   23.40
  -7 -13   1   33.60   29.50
  13  -7   1   18.10   28.00
   7  13   1   24.50   26.70
  -7 -13   1   37.40   27.90
 -13   7   1    9.50   23.00
  13  -7   1   15.20   27.70
 -13   7  -1   56.79   27.30
  -7 -13  -1  -47.00   39.70
 -13   7  -1   63.89   26.00
  -7 -13  -1  -26.30   22.20
   7  13  -1   -8.10   24.60
  13  -7  -1   51.89   28.20
  13  -7  -1   81.79   40.50
   7  13  -1   33.40   27.50
  -6 -13   1  116.79   34.50
 -13   6   1  123.09   30.90
  -6 -13   1  118.59   34.10
   6  13   1  144.99   31.90
 -13   6   1  126.39   27.60
   6  13   1  122.99   33.30
  13  -6   1   48.90   28.80
  13  -6   1   75.79   33.90
   6  13  -1   79.99   30.10
  13  -6  -1  150.18   38.20
  -6 -13  -1  141.99   37.00
  -6 -13  -1  124.89   32.30
 -13   6  -1  176.98   36.10
  13  -6  -1   84.89   30.20
 -13   6  -1  159.78   32.40
   6  13  -1  122.49   34.40
   5  13   1  142.59   33.90
   5  13   1   96.09   29.30
  -5 -13   1  141.39   36.20
  13  -5   1   70.89   29.80
  -5 -13   1  165.28   53.79
 -13   5   1   71.19   24.10
 -13   5   1  160.18   32.90
  -5 -13  -1  141.39   35.60
 -13   5  -1  192.98   36.10
   5  13  -1  114.39   31.70
 -13   5  -1  191.48   35.00
  -5 -13  -1  139.69   36.60
   5  13  -1  126.79   34.60
  13  -5  -1   98.59   31.40
  13  -5  -1  101.69   33.10
  13  -4   1  -17.50   20.50
   4  13   1   39.90   21.80
  -4 -13   1   65.79   27.90
   4  13   1   68.89   29.00
  -4 -13   1   40.20   25.50
  13  -4   1   62.19   28.00
 -13   4   1   55.49   24.60
 -13   4   1   49.40   22.20
  13  -4  -1   31.20   26.60
 -13   4  -1   56.49   23.60
   4  13  -1   45.40   26.00
   4  13  -1   76.79   28.50
  13  -4  -1   17.40   24.10
 -13   4  -1   29.80   24.50
  -4 -13  -1   41.80   30.90
  -4 -13  -1   50.49   27.40
  13  -3   1   13.80   22.60
  13  -3   1   46.60   27.80
  -3 -13   1   32.90   25.30
   3  13   1    2.10   20.90
   3  13   1   26.60   28.70
 -13   3   1   30.30   26.50
  -3 -13   1   12.20   22.70
 -13   3   1   31.50   20.80
   3  13  -1    1.80   21.80
  13  -3  -1   10.00   28.30
  -3 -13  -1    3.20   23.40
 -13   3  -1   45.60   21.60
  -3 -13  -1   40.10   27.40
  13  -3  -1    9.10   21.30
   3  13  -1   32.20   22.80
 -13   3  -1   19.40   24.70
 -13   2   1   68.09   30.00
  -2 -13   1   51.89   27.00
   2  13   1   62.89   23.70
  13  -2   1   62.79   27.70
 -13   2   1   72.39   22.90
  13  -2   1   69.89   25.90
  -2 -13   1   80.99   29.00
   2  13  -1   87.09   29.80
  -2 -13  -1   41.40   28.10
  13  -2  -1   92.79   32.90
 -13   2  -1   74.79   25.40
  -2 -13  -1   45.50   26.20
 -13   2  -1   57.99   26.50
   2  13  -1   62.49   26.20
  13  -2  -1   74.29   27.80
 -13   1   1  132.09   27.00
   1  13   1  138.09   29.60
  -1 -13   1  136.19   31.10
  13  -1   1  114.29   30.10
  -1 -13   1   84.99   29.20
 -13   1   1  123.39   32.40
  13  -1   1  139.99   33.00
 -13   1  -1  189.48   35.20
  -1 -13  -1   96.09   28.90
  13  -1  -1  120.19   32.70
  13  -1  -1  140.79   32.80
  -1 -13  -1   88.89   31.90
   1  13  -1  156.78   33.20
   1  13  -1   87.79   29.40
 -13   1  -1  139.29   31.60
 -13   0   1    3.10   16.50
  13   0   1    0.10   22.40
  13   0   1   23.00   23.10
   0  13   1  -11.70   24.00
   0 -13   1   -3.10   21.80
 -13   0   1    4.80   23.50
   0  13   1   15.80   19.10
  13   0  -1    2.70   21.20
   0  13  -1    1.20   21.50
  13   0  -1   28.80   25.60
 -13   0  -1  -36.50   19.20
   0  13  -1  -12.80   19.80
   0 -13  -1   -6.80   20.80
 -13   0  -1   14.20   22.40
  13   1   1  109.09   29.70
  13   1   1  108.09   29.70
   1 -13   1  121.59   31.10
   1 -13   1   87.09   26.90
  -1  13   1  100.69   49.10
 -13  -1   1  109.09   25.90
 -13  -1   1  152.08   34.90
  -1  13   1  128.09   29.20
  -1  13  -1  119.69   30.50
 -13  -1  -1  163.88   33.80
  13   1  -1  131.69   33.50
  13   1  -1  125.89   30.20
   1 -13  -1  100.59   28.90
 -13  -1  -1  111.09   30.80
  -1  13  -1  173.28   35.40
  13   2   1   89.39   28.10
   2 -13   1   53.69   26.20
 -13  -2   1   40.90   26.90
   2 -13   1   51.09   25.60
  -2  13   1   46.20   42.20
  13   2   1   46.00   26.90
  -2  13   1   13.90   19.90
 -13  -2   1   65.49   21.90
  -2  13  -1   76.59   27.60
   2 -13  -1   75.79   27.30
 -13  -2  -1  117.69   29.90
 -13  -2  -1   75.19   28.80
  -2  13  -1   58.69   25.80
  13   2  -1    7.60   20.80
  13   2  -1   60.99   29.80
   2 -13  -1   53.59   25.80
  13   3   1  -20.30   20.00
  13   3   1   -9.80   22.40
   3 -13   1   32.40   25.40
  -3  13   1   23.60   21.30
 -13  -3   1    2.30   26.00
   3 -13   1   18.80   23.60
  -3  13   1  -10.80   22.00
 -13  -3   1    4.80   17.50
   3 -13  -1  -17.80   22.10
 -13  -3  -1   38.10   24.20
  -3  13  -1   15.70   22.40
 -13  -3  -1   10.10   23.60
  -3  13  -1  -16.20   21.00
   3 -13  -1   26.40   25.30
  13   3  -1   25.00   23.10
  13   3  -1   27.60   27.80
   4 -13   1   95.99   30.40
  -4  13   1   43.50   27.60
 -13  -4   1   34.50   19.70
  -4  13   1   56.29   22.10
  13   4   1   49.50   24.50
   4 -13   1    0.20   24.20
 -13  -4   1   80.59   45.50
   4 -13  -1   54.29   26.20
 -13  -4  -1   28.20   26.50
  13   4  -1   47.00   24.80
  13   4  -1   13.90   26.00
 -13  -4  -1   61.79   25.80
  -4  13  -1   94.99   28.70
  -4  13  -1   34.90   26.10
   4 -13  -1   38.00   30.70
   5 -13   1  132.09   35.70
   5 -13   1   83.19   39.20
  13   5   1  127.79   33.50
  -5  13   1  176.08   38.10
  13   5   1   93.39   31.80
  -5  13   1  179.68   32.00
 -13  -5   1  113.69   33.80
 -13  -5   1  108.39   27.80
 -13  -5  -1  182.18   36.50
  13   5  -1  165.68   36.10
  -5  13  -1  151.38   31.70
 -13  -5  -1  161.68   36.20
   5 -13  -1  113.59   34.20
  13   5  -1  124.19   32.10
   5 -13  -1  117.29   34.70
  -5  13  -1  188.08   38.40
 -13  -6   1  147.99   31.10
  -6  13   1  163.38   35.90
  13   6   1  106.79   30.10
 -13  -6   1  143.99   33.80
  -6  13   1  132.19   30.90
   6 -13   1  135.79   43.90
  13   6   1  111.19   33.20
   6 -13   1  108.99   34.50
 -13  -6  -1  158.28   34.10
  -6  13  -1  185.28   38.30
   6 -13  -1  115.19   35.40
  -6  13  -1  126.89   30.50
 -13  -6  -1  145.39   36.40
  13   6  -1  131.89   33.70
  13   6  -1  172.48   38.60
   6 -13  -1  109.99   31.20
  13   7   1   27.60   27.90
   7 -13   1   24.80   29.70
   7 -13   1   13.30   25.80
 -13  -7   1   20.40   24.30
 -13  -7   1   36.90   29.90
  -7  13   1   66.09   30.40
  -7  13   1   30.20   25.40
  13   7   1   47.10   30.00
   7 -13  -1   47.30   27.50
  13   7  -1  -15.20   24.40
  -7  13  -1   61.89   27.10
  -7  13  -1   46.70   29.40
 -13  -7  -1   38.60   29.40
 -13  -7  -1   23.90   28.00
   7 -13  -1    8.00   35.60
  13   7  -1    2.00   26.30
 -13  -8   1   64.89   29.90
 -13  -8   1   27.30   28.50
  13   8   1   70.29   29.30
  -8  13   1   29.10   22.90
  -8  13   1    1.60   23.70
   8 -13   1   45.10   31.00
   8 -13   1    6.40   31.70
  13   8   1   47.20   30.80
  -8  13  -1   18.00   25.30
  13   8  -1  -11.20   23.70
 -13  -8  -1   49.90   45.60
   8 -13  -1   51.09   30.50
  13   8  -1   45.80   32.90
   8 -13  -1   -3.00   28.90
 -13  -8  -1  -10.40   24.60
 -13  -9   1   82.99   34.60
  -9  13   1   22.10   24.20
 -13  -9   1    8.40   26.40
  13   9   1   62.99   32.30
  13   9   1   27.80   29.50
   9 -13   1   -0.70   29.40
   9 -13   1   53.49   35.20
 -13  -9  -1  -20.60   28.00
   9 -13  -1   31.30   35.80
  -9  13  -1   61.29   29.20
  13   9  -1   39.60   31.30
 -13  -9  -1  100.49   37.20
  13   9  -1   36.40   34.70
   9 -13  -1   49.60   33.30
  10 -13   1    4.50   33.80
  13  10   1   21.40   29.80
  13  10   1   31.10   31.60
  10 -13   1   46.20   31.50
 -13 -10   1   16.40   31.40
 -13 -10   1   73.39   33.70
 -10  13   1    7.20   26.10
 -13 -10  -1   30.80   33.40
 -10  13  -1  -12.60   28.90
  10 -13  -1   82.79   38.40
  13  10  -1  -13.50   28.30
  13  10  -1   33.40   30.80
 -13 -10  -1    8.60   45.70
  10 -13  -1   28.80   33.20
  11 -13   1   49.80   36.90
  11 -13   1  -30.80   29.40
 -13 -11   1   16.10   33.30
 -11  13   1   18.70   24.40
  13  11   1   18.80   33.20
  13  11   1  -10.70   25.20
 -13 -11   1   43.40   33.20
  11 -13  -1  -12.80   34.50
  13  11  -1   76.19   36.60
 -13 -11  -1   -5.80   33.00
 -11  13  -1   65.49   30.60
  11 -13  -1   73.09   57.69
 -13 -11  -1   53.09   34.20
 -11  13  -1   45.70   28.80
  13  11  -1   76.89   35.00
 -12  13   1    5.90   21.40
  13  12   1  -16.40   26.60
 -13 -12   1  -41.60   29.90
 -12  13   1   -4.00   21.30
  12 -13   1  -14.20   31.10
  12 -13   1   19.00   43.30
  13  12   1  -37.20   26.30
 -13 -12   1   22.10   31.80
 -12  13  -1  -36.80   24.10
  13  12  -1   31.50   30.20
  12 -13  -1  -16.60   30.50
 -13 -12  -1   15.00   30.40
 -12  13  -1  -15.10   22.80
  13  12  -1   -7.10   33.60
 -13 -12  -1   23.10   32.90
  12 -13  -1  -12.70   34.50
 -13  13   1   31.10   25.80
  13  13   1  -71.79   24.70
 -13  13   1    6.50   24.00
  13  13   1   -9.60   31.90
  13 -13   1   16.50   36.70
 -13 -13   1  -67.89   25.10
  13 -13   1  -18.10   32.20
 -13 -13   1   35.80   48.60
  13  13  -1  -34.30   30.90
 -13  13  -1  -20.10   26.60
 -13 -13  -1   22.50   37.10
  13 -13  -1   33.80   32.00
  13 -13  -1    0.60   37.80
  13  13  -1  -11.70   30.50
 -13 -13  -1   17.60   32.10
 -13  13  -1  -27.90   22.70
  14 -13   1  -57.39   33.10
 -14  13   1  -12.60   24.90
 -13 -14   1  -47.00   32.20
 -13 -14   1  -52.29   29.30
  14 -13   1  -66.49   33.60
  13  14   1  -35.40   30.20
  13  14   1  -17.90   33.80
 -14  13  -1   -8.70   24.70
 -14  13  -1   13.40   30.50
  14 -13  -1   -4.40   35.90
 -13 -14  -1  -31.00   31.30
  13  14  -1  -20.90   34.00
  14 -13  -1   -3.00   37.50
  13  14  -1  -27.50   31.30
 -13 -14  -1   -4.60   32.40
  12  14   1  -25.10   29.00
 -12 -14   1    5.90   57.59
 -14  12   1    2.40   23.30
  14 -12   1   24.00   37.90
 -14  12   1   -4.40   22.00
 -12 -14   1   36.10   34.20
  14 -12   1  -13.40   32.90
  12  14   1   14.80   34.10
  14 -12  -1   25.50   36.90
 -12 -14  -1  -12.40   33.20
 -12 -14  -1   19.00   32.10
 -14  12  -1   33.30   28.30
  12  14  -1  -23.30   28.70
  14 -12  -1   66.89   34.10
  12  14  -1    3.90   31.00
 -14  12  -1   -9.50   27.00
  11  14   1   17.50   29.80
 -11 -14   1   96.19   41.00
 -11 -14   1  -16.60   31.20
 -14  11   1    8.80   24.80
  11  14   1   94.79   34.20
  14 -11   1   17.80   40.40
 -14  11   1   29.80   25.80
  14 -11   1   34.10   32.60
 -11 -14  -1   61.09   40.90
  14 -11  -1   28.80   35.80
 -11 -14  -1   33.80   34.00
 -14  11  -1   51.49   32.50
  11  14  -1   51.99   36.40
  11  14  -1   66.09   38.40
 -14  11  -1   11.60   27.10
  14 -11  -1   -9.30   35.10
 -10 -14   1   41.40   36.60
 -14  10   1  -43.40   19.50
  14 -10   1  -52.09   27.20
  10  14   1   31.70   30.60
  10  14   1    0.70   24.90
 -10 -14   1  -17.30   29.70
 -14  10   1   -1.10   25.50
  14 -10   1   15.40   37.80
  10  14  -1   -1.50   28.50
 -14  10  -1  -12.20   19.10
 -10 -14  -1    2.80   30.00
 -10 -14  -1    8.80   33.00
  10  14  -1  -35.50   24.70
  14 -10  -1  -18.70   31.80
  14 -10  -1   52.69   36.70
 -14  10  -1   -5.90   28.50
 -14   9   1   -2.00   22.30
  14  -9   1  -26.60   25.10
   9  14   1   36.10   27.80
  -9 -14   1    9.20   27.60
  14  -9   1  -45.60   28.90
  -9 -14   1   38.70   36.30
   9  14   1  -33.70   23.80
 -14   9   1  -34.20   21.70
  -9 -14  -1   16.30   36.00
  14  -9  -1    2.10   35.90
   9  14  -1  -37.50   24.40
  14  -9  -1   -3.60   35.50
 -14   9  -1  -19.00   23.30
 -14   9  -1   16.40   23.00
   9  14  -1   30.80   30.60
 -14   8   1   10.10   22.50
 -14   8   1   40.80   25.90
  -8 -14   1   -6.50   23.00
   8  14   1    3.20   28.80
  -8 -14   1   45.30   33.90
  14  -8   1   11.90   26.50
  14  -8   1    7.60   30.00
   8  14   1   23.40   27.40
 -14   8  -1  -12.10   41.10
  -8 -14  -1   27.40   34.80
  14  -8  -1   35.70   28.20
  -8 -14  -1    2.20   27.70
   8  14  -1   23.00   29.40
  14  -8  -1    9.10   31.80
   8  14  -1   19.20   31.70
 -14   8  -1    5.50   24.80
 -14   7   1   45.20   26.40
 -14   7   1   43.40   24.80
   7  14   1   43.80   29.60
   7  14   1   49.80   28.50
  14  -7   1   11.80   30.90
  -7 -14   1   96.99   33.80
  14  -7   1   67.39   32.40
  -7 -14   1  101.69   36.00
  -7 -14  -1   81.09   33.80
   7  14  -1   53.39   51.69
  14  -7  -1   79.89   32.60
 -14   7  -1   60.99   28.20
  -7 -14  -1   56.69   32.90
   7  14  -1  153.68   39.70
  14  -7  -1  102.19   35.80
  -6 -14   1   83.19   34.60
  14  -6   1  119.09   37.70
 -14   6   1  138.29   33.10
   6  14   1  135.49   36.00
  -6 -14   1  118.09   35.30
 -14   6   1  101.79   30.40
   6  14   1  118.89   33.20
  14  -6   1  116.69   35.30
  14  -6  -1   48.30   38.40
  14  -6  -1   82.79   33.30
 -14   6  -1   85.59   33.10
  -6 -14  -1   62.99   33.00
  -6 -14  -1  123.69   35.50
   6  14  -1   87.89   34.20
 -14   6  -1   56.49   26.90
   6  14  -1   98.29   32.40
 -14   5   1   81.59   28.90
  -5 -14   1   97.59   32.70
  14  -5   1   68.29   29.20
   5  14   1   71.09   29.30
  14  -5   1   69.19   31.10
  -5 -14   1   90.99   33.00
 -14   5   1   69.89   23.70
   5  14   1   60.79   30.90
  14  -5  -1   29.30   32.80
 -14   5  -1   35.70   25.70
   5  14  -1   65.49   32.30
   5  14  -1  135.99   35.70
  14  -5  -1   -0.90   25.00
 -14   5  -1   76.99   27.60
  -5 -14  -1   84.89   32.50
  -5 -14  -1   50.49   47.20
  -4 -14   1    6.10   24.50
  -4 -14   1   -8.60   28.00
  14  -4   1   -7.50   26.30
  14  -4   1  -23.20   27.90
   4  14   1  -11.10   23.10
 -14   4   1   27.40   22.10
   4  14   1   -4.50   21.30
 -14   4   1   -6.20   18.20
  14  -4  -1   10.50   23.90
   4  14  -1   19.50   21.90
 -14   4  -1  -14.20   19.60
 -14   4  -1   31.90   26.00
  -4 -14  -1  -49.70   32.20
  -4 -14  -1  -12.70   23.80
   4  14  -1   -8.90   26.00
  14  -4  -1  -11.90   28.50
   3  14   1   26.10   23.00
  -3 -14   1   21.80   29.30
   3  14   1  -13.10   23.70
 -14   3   1   16.00   20.50
  -3 -14   1   81.59   33.60
  14  -3   1   16.20   29.00
  14  -3   1   60.69   31.10
 -14   3   1    0.80   21.30
   3  14  -1   39.00   26.20
   3  14  -1  -32.70   23.30
 -14   3  -1   12.50   22.40
  14  -3  -1    6.20   23.40
  -3 -14  -1   42.20   26.30
  14  -3  -1  -14.20   28.80
  -3 -14  -1   22.30   29.40
 -14   3  -1   -1.70   23.40
 -14   2   1   12.40   18.60
  14  -2   1   62.99   29.80
  14  -2   1   75.79   30.80
  -2 -14   1    9.20   39.90
 -14   2   1   16.70   24.50
   2  14   1   70.79   25.50
  -2 -14   1    2.90   26.50
   2  14   1   46.70   28.30
  -2 -14  -1   21.30   27.70
 -14   2  -1   34.90   24.10
  14  -2  -1   25.00   28.10
  -2 -14  -1   14.30   24.60
 -14   2  -1   14.60   25.50
  14  -2  -1   25.20   24.80
   2  14  -1   12.60   27.00
   2  14  -1   14.90   25.00
   1  14   1   39.20   23.10
  14  -1   1   18.00   25.90
  14  -1   1   52.19   28.00
   1  14   1   10.50   25.00
  -1 -14   1   -3.40   48.10
 -14   1   1   46.10   26.00
 -14   1   1   31.30   19.90
  -1 -14  -1    9.80   25.10
 -14   1  -1   18.10   25.00
  14  -1  -1   16.20   28.50
   1  14  -1   -1.90   23.10
   1  14  -1   54.69   29.00
  14  -1  -1   65.39   28.80
  -1 -14  -1   12.70   24.70
 -14   1  -1   21.00   23.90
 -14   0   1   55.29   25.90
   0  14   1    1.60   19.20
   0 -14   1   18.20   32.00
 -14   0   1   26.60   19.70
  14   0   1   63.89   29.80
  14   0   1   39.90   29.20
   0  14   1   50.39   26.80
  14   0  -1   16.40   29.80
 -14   0  -1   69.19   28.50
   0  14  -1   21.60   24.80
 -14   0  -1   24.70   24.80
  14   0  -1   31.30   25.90
   0 -14  -1   30.10   26.10
   0  14  -1   35.40   27.80
 -14  -1   1   18.60   21.20
  14   1   1   54.39   28.90
   1 -14   1  -13.40   42.30
  -1  14   1   64.59   29.30
   1 -14   1   74.29   31.80
 -14  -1   1   31.80   26.80
  -1  14   1   17.50   21.40
  14   1   1    5.90   23.90
  14   1  -1   37.50   28.00
  -1  14  -1   50.89   28.80
 -14  -1  -1   13.50   24.40
   1 -14  -1   25.70   26.20
  14   1  -1   35.90   30.00
  -1  14  -1   47.20   27.00
 -14  -1  -1   25.40   23.90
   1 -14  -1    5.10   24.60
  -2  14   1   51.79   27.90
  14   2   1    1.90   22.90
   2 -14   1   63.39   29.50
  -2  14   1   43.10   24.00
  14   2   1   47.50   27.60
 -14  -2   1   19.40   24.00
 -14  -2   1   40.70   21.70
   2 -14  -1   10.00   24.40
 -14  -2  -1   48.60   28.40
  -2  14  -1   38.80   25.70
  14   2  -1   22.00   25.60
   2 -14  -1   79.69   31.70
  14   2  -1   49.30   30.10
 -14  -2  -1   55.99   26.30
  -2  14  -1   14.30   25.90
  -3  14   1   26.70   25.30
 -14  -3   1   19.80   22.50
   3 -14   1   19.90   35.80
 -14  -3   1   12.00   23.40
  14   3   1   -0.50   25.70
  -3  14   1   43.90   24.20
  14   3   1   41.80   26.30
   3 -14   1   11.70   28.50
 -14  -3  -1   11.60   25.00
  14   3  -1   -3.10   27.90
  -3  14  -1    8.20   21.70
   3 -14  -1   39.00   31.40
  14   3  -1   -6.80   23.20
 -14  -3  -1   24.10   26.80
   3 -14  -1   39.60   27.10
  -3  14  -1  -11.90   24.50
  -4  14   1  -27.80   16.20
 -14  -4   1   21.40   27.90
   4 -14   1    3.80   29.10
  -4  14   1   20.80   25.10
  14   4   1   16.50   27.50
  14   4   1  -35.60   22.40
 -14  -4   1  -14.90   18.30
   4 -14   1   -4.20   24.90
   4 -14  -1  -15.20   23.20
 -14  -4  -1    7.80   25.30
  -4  14  -1   -4.80   27.40
  14   4  -1   -8.60   23.50
   4 -14  -1   20.70   38.20
  14   4  -1   -5.30   26.30
 -14  -4  -1   61.99   29.70
  -4  14  -1   48.70   23.60
   5 -14   1   89.99   32.00
  -5  14   1   58.49   30.00
  -5  14   1   45.30   27.00
 -14  -5   1   76.89   28.90
  14   5   1  111.29   33.50
   5 -14   1  122.09   36.60
 -14  -5   1  101.09   34.60
  14   5   1   86.09   32.60
  14   5  -1   81.29   31.90
 -14  -5  -1   21.60   28.60
  14   5  -1   63.99   31.30
 -14  -5  -1  116.59   32.40
   5 -14  -1   10.00   25.70
  -5  14  -1   23.50   25.30
   5 -14  -1   24.90   33.90
  -5  14  -1  100.69   28.90
  -6  14   1  100.29   28.20
 -14  -6   1   86.59   31.40
  -6  14   1  161.08   38.20
   6 -14   1   79.29   33.90
 -14  -6   1  140.89   34.30
  14   6   1   99.19   35.50
   6 -14   1  116.79   35.20
  14   6   1   80.59   32.00
 -14  -6  -1  123.69   35.50
  14   6  -1  148.89   37.70
 -14  -6  -1   79.79   47.50
  -6  14  -1  124.09   36.00
  14   6  -1  115.49   45.60
  -6  14  -1  101.09   32.60
   6 -14  -1  101.59   34.60
   6 -14  -1  101.69   36.80
  -7  14   1   31.80   26.70
  14   7   1   41.80   29.60
 -14  -7   1  133.39   35.40
 -14  -7   1   48.00   28.70
  -7  14   1   66.99   27.80
   7 -14   1   74.79   35.80
  14   7   1   81.69   31.10
   7 -14   1   21.40   32.10
  -7  14  -1   69.99   29.60
   7 -14  -1   78.79   36.40
 -14  -7  -1   97.49   31.70
 -14  -7  -1   34.70   31.10
   7 -14  -1   73.09   35.90
  14   7  -1    6.10   37.70
  -7  14  -1   81.39   45.00
  14   7  -1   28.10   29.40
  -8  14   1    4.60   22.90
   8 -14   1   -2.80   28.90
   8 -14   1  -28.50   26.80
  14   8   1  -39.70   25.30
  14   8   1   71.59   33.90
 -14  -8   1   -7.10   29.20
 -14  -8   1   30.40   29.00
  -8  14   1  -61.79   24.00
  -8  14  -1   17.00   38.80
   8 -14  -1   34.80   33.50
   8 -14  -1   13.70   29.10
 -14  -8  -1    2.20   29.10
  -8  14  -1   -1.60   27.60
  14   8  -1   32.80   33.30
 -14  -8  -1   18.70   29.80
   9 -14   1    6.00   32.30
 -14  -9   1  -16.40   25.30
 -14  -9   1   67.29   36.70
  -9  14   1   -3.80   23.30
   9 -14   1   -5.30   25.60
  -9  14   1  -12.30   26.60
  14   9   1  -49.10   25.70
  14   9   1   -0.60   28.90
   9 -14  -1   26.70   35.10
  -9  14  -1    8.90   26.00
 -14  -9  -1   39.10   34.80
 -14  -9  -1  -19.40   28.10
   9 -14  -1    3.60   29.40
  14   9  -1   36.20   34.10
  14   9  -1    7.70   27.20
 -10  14   1   11.50   24.50
  10 -14   1  -16.40   33.70
  14  10   1   22.80   31.50
  10 -14   1  -25.30   27.60
 -14 -10   1  -26.50   24.30
  14  10   1  -44.00   26.80
 -14 -10   1   15.40   30.60
  10 -14  -1    6.40   30.50
 -14 -10  -1   -7.70   28.60
  14  10  -1   17.90   30.60
 -10  14  -1   -2.10   24.70
 -14 -10  -1    5.90   29.10
  10 -14  -1   10.20   33.20
  14  10  -1   41.00   32.10
 -14 -11   1   27.70   29.00
  14  11   1   82.29   34.00
 -11  14   1   30.90   26.00
 -14 -11   1  -68.59   30.60
  11 -14   1   46.40   32.70
  14  11   1  -16.30   27.90
  11 -14   1   19.60   55.59
 -14 -11  -1  -17.70   28.90
  11 -14  -1  -42.70   32.70
  14  11  -1  -12.30   30.20
  14  11  -1   26.70   32.90
 -14 -11  -1  -61.99   32.20
 -11  14  -1   54.59   30.20
  11 -14  -1    0.20   32.70
  12 -14   1   27.00   37.40
  12 -14   1   -2.20   32.60
 -14 -12   1   -7.20   44.20
 -12  14   1   -2.00   21.40
  14  12   1  -13.20   29.00
 -14 -12   1   -6.50   27.60
  14  12   1  -27.60   29.20
 -12  14  -1   -8.90   27.10
 -12  14  -1  -12.70   23.80
 -14 -12  -1   49.70   37.50
  12 -14  -1    8.60   33.50
 -14 -12  -1  -13.40   32.70
  14  12  -1  -42.10   29.90
  14  12  -1    2.80   31.70
  12 -14  -1  -10.00   35.80
  13 -14   1  -61.79   33.30
  13 -14   1  -13.30   38.60
 -14 -13   1  -19.50   34.20
  14  13   1   36.70   35.60
 -13  14   1    6.50   24.60
 -14 -13   1  -10.80   36.30
  14  13   1  -66.89   30.60
 -14 -13  -1   -0.30   29.70
  14  13  -1  -16.50   31.30
  13 -14  -1   34.70   40.10
 -13  14  -1   -2.60   27.20
  13 -14  -1   -3.20   36.40
  14  13  -1  -38.10   31.30
 -13  14  -1    2.10   24.70
 -14  14   1   -4.30   22.30
 -14 -14   1   54.69   59.79
 -14  14   1  -20.10   30.00
  14  14   1  -35.40   31.00
  14 -14   1   32.70   38.70
  14  14   1  -26.80   32.50
  14 -14   1  -17.50   40.70
 -14 -14   1  -27.30   37.10
  14 -14  -1  -61.99   36.10
  14  14  -1    3.20   35.70
 -14 -14  -1   -4.50   39.70
  14 -14  -1  -87.89   30.80
 -14  14  -1   19.60   27.70
 -14  14  -1  -17.30   28.00
  14  14  -1   37.90   36.20
 -14 -14  -1  -14.00   30.50
 -14 -15   1  -84.39   32.20
 -15  14   1   31.30   28.30
 -14 -15   1  -48.50   38.60
  14  15   1  -40.80   32.20
  14  15   1   18.40   40.90
 -15  14   1   -9.20   29.40
  15 -14   1   16.90   41.30
  15 -14   1  -10.30   36.30
 -14 -15  -1  -85.99   32.80
  15 -14  -1  -32.70   40.80
 -15  14  -1  -32.50   25.30
 -14 -15  -1  -85.29   31.90
  15 -14  -1  -23.50   37.30
 -15  14  -1   35.30   28.60
  14  15  -1  -50.09   34.80
  14  15  -1  -67.59   27.00
  13  15   1    6.80   36.20
  15 -13   1   30.40   37.90
 -15  13   1   10.00   35.80
 -15  13   1   24.20   29.10
 -13 -15   1  -43.60   53.69
 -13 -15   1   82.69   46.80
  15 -13   1  -10.70   40.50
 -13 -15  -1  -39.00   37.70
  13  15  -1   -7.20   33.90
 -13 -15  -1   -1.10   31.60
  15 -13  -1  -10.30   37.30
 -15  13  -1  -25.70   27.20
 -15  13  -1  -16.40   23.90
  15 -13  -1  -32.90   34.70
  13  15  -1   -5.50   32.20
  15 -12   1    7.30   36.60
 -15  12   1    3.20   25.20
 -12 -15   1   -4.40   33.20
  15 -12   1  -84.09   31.00
  12  15   1   14.30   39.00
 -12 -15   1  -38.50   31.50
  12  15   1   10.30   29.80
 -12 -15  -1   21.50   35.90
 -15  12  -1    3.10   26.70
  15 -12  -1  -18.60   34.70
  15 -12  -1  -58.79   31.40
 -12 -15  -1  -90.39   30.70
 -15  12  -1   -2.60   30.60
  12  15  -1   63.39   40.60
  12  15  -1    1.70   31.10
 -15  11   1   16.90   25.50
 -15  11   1   17.20   25.30
  11  15   1   36.00   34.50
  15 -11   1  -30.70   30.80
  15 -11   1   36.40   38.10
  11  15   1   -5.60   28.50
 -11 -15   1   17.20   39.00
 -11 -15   1  -43.40   27.90
  11  15  -1   24.30   33.00
 -15  11  -1   41.50   26.00
 -11 -15  -1    9.20   33.80
  11  15  -1   53.59   33.90
 -11 -15  -1   16.20   33.00
  15 -11  -1   -1.20   32.60
 -15  11  -1    5.80   28.30
  15 -11  -1  -22.70   32.00
  10  15   1  -13.10   26.40
 -10 -15   1   -4.70   29.10
  15 -10   1   -1.70   27.50
  10  15   1  -15.50   26.00
 -15  10   1   -6.30   21.30
 -15  10   1    7.20   24.10
  15 -10   1   92.19   50.49
  10  15  -1  -31.90   31.10
 -10 -15  -1   12.50   32.80
  15 -10  -1  -19.60   33.00
  10  15  -1   -2.00   27.80
  15 -10  -1  -28.30   30.20
 -15  10  -1  -24.10   26.30
 -10 -15  -1  -51.49   31.70
 -15  10  -1    8.70   26.90
   9  15   1   62.39   32.50
  15  -9   1   97.69   38.00
  15  -9   1   34.10   35.40
  -9 -15   1  103.29   34.20
 -15   9   1   40.80   27.50
   9  15   1   45.20   31.40
 -15   9   1   37.50   26.10
  -9 -15   1   16.70   33.60
 -15   9  -1   85.69   28.00
   9  15  -1   36.50   29.70
  -9 -15  -1   73.19   36.30
 -15   9  -1   59.99   30.70
   9  15  -1   88.79   39.40
  -9 -15  -1   92.49   40.30
  15  -9  -1   89.19   38.40
  15  -9  -1   83.99   36.80
  15  -8   1  -36.50   24.80
 -15   8   1   16.00   23.90
 -15   8   1   10.40   24.80
  15  -8   1   -1.30   31.70
  -8 -15   1  -23.10   26.20
   8  15   1   -2.80   25.80
   8  15   1  -41.50   25.30
  -8 -15   1   57.59   36.30
   8  15  -1   53.29   33.80
  -8 -15  -1   16.40   28.80
 -15   8  -1   31.10   26.00
   8  15  -1   48.20   32.80
 -15   8  -1  -15.80   26.50
  15  -8  -1   27.20   35.90
  -8 -15  -1   19.90   32.10
  15  -8  -1   88.29   39.70
  -7 -15   1   57.19   30.70
  -7 -15   1   72.59   36.80
 -15   7   1   64.99   26.40
  15  -7   1   38.90   33.10
 -15   7   1   47.90   29.00
   7  15   1   -3.90   28.10
  15  -7   1   49.99   30.40
   7  15   1   74.99   32.90
   7  15  -1   29.10   29.90
  15  -7  -1   17.30   31.40
   7  15  -1   61.39   33.00
  15  -7  -1  -26.70   31.40
  -7 -15  -1   46.00   35.20
  -7 -15  -1   65.99   37.00
 -15   7  -1   45.40   29.80
 -15   7  -1   49.80   27.30
  -6 -15   1   99.49   33.80
  15  -6   1  203.08   40.30
   6  15   1  129.09   35.10
 -15   6   1  106.29   29.60
 -15   6   1   88.99   28.40
  -6 -15   1   84.09   36.80
  15  -6   1   82.69   31.60
   6  15   1   74.99   34.30
  -6 -15  -1  142.89   38.40
  -6 -15  -1  131.49   39.50
 -15   6  -1  115.59   33.20
  15  -6  -1  158.38   39.40
 -15   6  -1  194.78   49.60
   6  15  -1  142.79   38.80
   6  15  -1  125.89   45.80
  15  -6  -1   70.89   32.00
  15  -5   1  -34.80   22.90
  -5 -15   1  -45.90   25.40
 -15   5   1  -11.60   21.30
 -15   5   1  -24.00   20.80
   5  15   1  -16.00   23.50
  -5 -15   1   21.20   30.00
   5  15   1   27.80   27.60
  15  -5   1  -51.39   27.10
 -15   5  -1    9.50   33.80
  15  -5  -1   19.60   26.80
  -5 -15  -1  -23.50   32.50
   5  15  -1   47.10   48.00
  -5 -15  -1   14.00   29.10
  15  -5  -1   -8.90   27.30
   5  15  -1   -1.90   31.50
  -4 -15   1   16.70   29.00
  15  -4   1   63.59   40.50
 -15   4   1   74.79   27.60
   4  15   1   83.39   29.90
   4  15   1   39.10   29.70
 -15   4   1   64.79   27.80
  15  -4   1   36.60   31.60
  -4 -15   1   63.39   34.50
  -4 -15  -1   89.59   36.50
 -15   4  -1   57.99   30.40
  -4 -15  -1   64.19   33.90
 -15   4  -1   29.20   24.90
   4  15  -1   83.19   39.60
   4  15  -1   33.40   27.70
  15  -4  -1   29.60   32.10
  15  -4  -1   39.50   35.30
  -3 -15   1   12.10   29.10
   3  15   1   44.90   27.90
  -3 -15   1   27.70   31.20
 -15   3   1   37.20   25.00
   3  15   1   17.40   26.20
  15  -3   1   10.30   31.00
 -15   3   1    6.80   21.90
  15  -3   1  -10.50   26.80
 -15   3  -1   41.40   28.80
  15  -3  -1   61.49   30.40
 -15   3  -1   22.90   22.30
   3  15  -1   43.70   30.00
  -3 -15  -1   -0.30   28.00
   3  15  -1   29.80   27.70
  -3 -15  -1   47.80   31.30
  15  -3  -1   53.69   36.30
   2  15   1   96.19   32.70
  15  -2   1  127.69   37.30
   2  15   1  120.59   31.60
  15  -2   1   66.49   31.70
 -15   2   1  113.99   28.00
  -2 -15   1   61.69   32.40
 -15   2   1   73.49   26.40
  -2 -15   1   57.19   31.50
 -15   2  -1  141.99   37.00
  15  -2  -1   92.59   32.50
 -15   2  -1  132.49   33.60
  -2 -15  -1  115.99   35.20
   2  15  -1   71.99   31.70
  -2 -15  -1   60.39   33.20
   2  15  -1   62.59   30.10
  15  -2  -1   51.79   51.09
  15  -1   1  123.49   36.30
   1  15   1   83.99   27.50
   1  15   1   76.39   31.60
  -1 -15   1  134.49   34.50
  15  -1   1  105.39   33.00
 -15   1   1   66.29   26.00
 -15   1   1  127.79   33.50
   1  15  -1   39.90   29.60
  15  -1  -1  137.99   47.30
 -15   1  -1   85.09   30.50
   1  15  -1  121.89   32.80
  -1 -15  -1   95.89   33.50
  15  -1  -1  100.49   34.50
 -15   1  -1  109.29   34.10
  15   0   1   70.79   33.60
 -15   0   1   28.90   27.10
   0  15   1   60.49   29.80
   0  15   1   29.30   24.10
  15   0   1   50.39   29.90
 -15   0   1   24.20   22.00
   0 -15   1    9.70   27.50
  15   0  -1   79.99   32.70
   0  15  -1    6.00   26.30
  15   0  -1    0.70   35.10
 -15   0  -1   49.30   29.60
 -15   0  -1   59.39   28.80
   0 -15  -1   26.60   28.40
   0  15  -1   20.30   24.70
   1 -15   1   58.19   31.70
 -15  -1   1  142.29   36.40
   1 -15   1   58.59   30.20
  -1  15   1  129.29   36.30
 -15  -1   1   89.49   27.60
  15   1   1  105.19   32.70
  15   1   1   44.30   30.70
  -1  15   1   59.79   26.30
  -1  15  -1   79.09   29.60
  15   1  -1   81.79   40.60
  -1  15  -1   53.19   31.80
 -15  -1  -1   98.39   32.90
  15   1  -1  171.38   38.30
 -15  -1  -1   86.69   31.50
   1 -15  -1    3.00   25.80
   1 -15  -1   51.29   32.50
   2 -15   1  112.69   36.90
 -15  -2   1   77.79   30.80
 -15  -2   1   49.10   26.20
  15   2   1   86.89   29.70
  -2  15   1   56.89   25.80
  -2  15   1   71.19   30.20
  15   2   1   30.00   30.80
   2 -15   1  105.89   34.30
  -2  15  -1  118.09   32.30
 -15  -2  -1   83.29   31.80
  15   2  -1   81.29   32.10
  15   2  -1   62.59   42.50
 -15  -2  -1   90.69   32.30
   2 -15  -1   43.30   30.90
   2 -15  -1   44.70   31.40
  -2  15  -1  111.79   34.90
   3 -15   1   56.29   35.00
 -15  -3   1   61.89   28.30
  -3  15   1   71.09   30.70
   3 -15   1   48.80   30.10
  15   3   1   16.70   26.10
  15   3   1   15.70   30.20
  -3  15   1    8.90   22.30
 -15  -3   1   22.80   29.20
   3 -15  -1   56.19   33.10
 -15  -3  -1   44.50   29.10
  -3  15  -1  -13.60   21.90
  15   3  -1   23.50   29.90
   3 -15  -1   11.70   29.00
  -3  15  -1  -17.30   24.40
  15   3  -1   15.90   44.80
 -15  -3  -1   -7.00   26.80
  -4  15   1   34.10   24.50
  15   4   1   88.09   33.60
   4 -15   1   25.40   34.50
 -15  -4   1   70.69   29.60
  -4  15   1  127.19   35.40
   4 -15   1   88.19   37.30
 -15  -4   1  105.09   32.80
  15   4   1   58.49   29.40
   4 -15  -1   21.70   31.70
  15   4  -1   24.70   27.80
 -15  -4  -1   52.39   43.60
  -4  15  -1   60.19   30.40
 -15  -4  -1   34.10   28.10
   4 -15  -1   39.00   33.50
  15   4  -1   42.40   38.10
  -5  15   1  -17.60   25.10
 -15  -5   1   14.60   24.60
   5 -15   1    9.40   32.00
  15   5   1   14.90   28.80
  -5  15   1   -1.10   23.60
  15   5   1   -6.80   23.70
 -15  -5   1   -3.30   26.80
   5 -15   1    4.70   29.20
  15   5  -1   39.40   30.70
  15   5  -1    2.50   27.80
   5 -15  -1  -59.59   29.80
  -5  15  -1    9.30   28.50
   5 -15  -1   -9.60   26.70
  -5  15  -1    7.00   24.60
 -15  -5  -1   25.20   29.50
 -15  -5  -1   10.40   26.20
  -6  15   1  153.88   41.10
  15   6   1  121.29   37.90
 -15  -6   1   90.19   31.90
  -6  15   1  138.69   34.90
 -15  -6   1  102.09   36.50
   6 -15   1  138.49   37.80
  15   6   1  158.18   40.50
   6 -15   1  119.19   34.70
  -6  15  -1  101.89   37.50
  15   6  -1  205.48   44.30
   6 -15  -1   64.99   33.30
  -6  15  -1  143.69   52.59
 -15  -6  -1  228.58   70.59
 -15  -6  -1  163.18   40.40
   6 -15  -1   79.89   36.50
   7 -15   1  120.09   38.20
  -7  15   1   50.09   29.00
  -7  15   1   20.40   29.70
  15   7   1   -6.10   29.90
  15   7   1   90.29   35.50
   7 -15   1   63.39   32.40
 -15  -7   1    8.30   26.30
 -15  -7   1   70.59   33.00
  15   7  -1   69.49   32.60
   7 -15  -1   80.49   36.60
  -7  15  -1   98.49   38.80
  -7  15  -1   73.89   34.50
 -15  -7  -1   52.69   34.50
  15   7  -1   65.89   35.20
   7 -15  -1    9.60   32.40
 -15  -7  -1   16.00   30.90
  15   8   1  -11.10   28.40
  -8  15   1   17.30   25.10
  -8  15   1  -41.10   23.80
   8 -15   1   60.39   37.90
 -15  -8   1   77.89   32.60
   8 -15   1  -10.60   31.80
  15   8   1  -36.40   25.60
 -15  -8   1   44.50   33.70
   8 -15  -1   42.50   35.40
 -15  -8  -1   17.10   26.70
  15   8  -1   72.09   36.10
  -8  15  -1    9.40   31.80
 -15  -8  -1  -48.50   27.40
  -8  15  -1   11.70   26.20
  15   8  -1    1.20   29.70
  -9  15   1   98.49   35.90
  15   9   1  -18.00   24.70
   9 -15   1   75.59   36.40
   9 -15   1   58.89   42.30
 -15  -9   1   67.09   36.10
  15   9   1   69.19   34.30
  -9  15   1   78.29   29.70
 -15  -9   1   96.39   37.30
   9 -15  -1   55.39   36.20
  -9  15  -1  151.88   39.10
   9 -15  -1  108.49   38.20
  15   9  -1    2.70   30.50
 -15  -9  -1   70.19   37.50
 -15  -9  -1  137.49   40.60
  15   9  -1   93.09   38.70
  -9  15  -1  117.69   37.40
 -15 -10   1  -19.60   30.40
  10 -15   1  -50.99   44.40
  10 -15   1   -7.60   30.70
  15  10   1   69.39   34.90
 -10  15   1  -18.70   22.80
  15  10   1  -16.00   30.70
 -15 -10   1   13.00   32.20
 -10  15   1   -9.50   26.50
 -15 -10  -1  -34.30   32.30
  15  10  -1   68.79   38.60
  10 -15  -1   59.09   41.40
 -15 -10  -1   19.30   34.30
  10 -15  -1   21.40   34.20
 -10  15  -1    9.80   29.10
  15  10  -1   38.00   30.00
  15  11   1   28.10   31.60
 -15 -11   1    3.50   32.30
 -11  15   1   -2.90   23.40
  15  11   1    6.90   32.60
  11 -15   1  -42.60   30.20
  11 -15   1  -44.80   32.40
 -15 -11  -1   65.19   38.00
 -11  15  -1  -14.20   27.40
  15  11  -1    3.40   33.00
 -15 -11  -1   -1.40   34.70
  11 -15  -1    4.40   33.10
  15  11  -1  -70.69   28.20
  11 -15  -1  -30.80   31.30
 -15 -12   1  -15.90   34.40
  15  12   1  -18.20   30.30
 -15 -12   1  -54.69   30.80
 -12  15   1  -28.90   22.80
  12 -15   1  -54.69   36.70
  15  12   1   34.40   48.70
  12 -15   1  -19.20   35.80
 -12  15  -1   -0.30   27.50
  15  12  -1  -72.79   29.90
  15  12  -1  -64.39   31.00
  12 -15  -1   -7.70   35.00
 -15 -12  -1   12.40   31.70
 -15 -12  -1  -68.99   30.70
  12 -15  -1  -63.69   32.80
  13 -15   1   29.70   38.00
 -15 -13   1  -11.70   37.80
  15  13   1  -66.69   31.30
  13 -15   1  -23.80   38.80
 -13  15   1    5.00   31.70
  15  13   1   -3.90   32.20
  13 -15  -1   -6.90   38.60
  15  13  -1  -20.00   35.00
  15  13  -1   -8.50   32.00
 -13  15  -1   -2.70   28.70
 -15 -13  -1  -40.00   36.80
 -15 -13  -1   12.80   34.10
  13 -15  -1   41.40   40.30
  14 -15   1   11.50   35.70
  15  14   1  -41.80   36.80
 -15 -14   1  -65.39   34.90
 -14  15   1  -15.50   27.90
 -15 -14   1  -44.30   37.10
  15  14   1   -4.70   33.10
  14 -15   1   16.30   42.90
 -15 -14  -1  -32.40   37.50
 -15 -14  -1  -58.59   37.20
  14 -15  -1  -39.00   37.00
  15  14  -1   40.50   35.40
  14 -15  -1  -47.30   37.30
  15  14  -1  -75.59   34.40
 -14  15  -1  -64.69   21.50
  15  15   1   42.10   36.60
 -15  15   1  -23.10   30.50
  15 -15   1   -1.30   45.50
 -15 -15   1  -48.80   42.20
  15 -15   1   11.80   40.30
 -15 -15   1  -44.20   38.40
  15  15  -1   35.80   37.70
 -15 -15  -1  -73.09   31.30
  15 -15  -1    8.80   42.20
  15 -15  -1  -60.59   48.40
  15  15  -1  -34.20   61.59
 -15  15  -1  -27.00   27.80
 -15  15  -1  -45.50   30.80
 -15 -15  -1    1.40   38.20
 -15 -16   1   31.50   48.40
  16 -15   1  -91.39   40.20
  16 -15  -1 -107.59   39.90
 -15 -16  -1  -41.30   41.10
  15  16  -1  -38.20   38.20
 -16  15  -1   39.10   32.90
  15  16  -1  -40.60   30.50
 -16  15  -1  -58.69   27.60
 -14 -16   1   -8.20   37.10
  14  16   1   44.30   36.80
  16 -14   1  -12.80   41.10
 -16  14   1  -14.80   29.80
  16 -14   1  -33.20   43.80
 -14 -16   1  -75.39   40.40
  14  16  -1   29.50   35.20
 -16  14  -1  -54.39   30.20
  16 -14  -1  -55.59   40.00
  16 -14  -1  -42.70   50.89
 -16  14  -1   -0.30   31.60
 -14 -16  -1  -67.29   32.70
 -14 -16  -1   -8.00   37.10
 -13 -16   1   -0.20   41.60
 -16  13   1   -3.40   26.70
  16 -13   1    4.30   42.10
  13  16   1   -6.30   36.20
  13  16   1  -20.00   37.50
 -13 -16   1   21.80   43.50
  16 -13   1  -10.60   39.30
 -16  13   1  -22.70   26.60
 -16  13  -1  -65.29   23.90
  13  16  -1    3.90   29.60
  16 -13  -1  -38.20   35.50
 -13 -16  -1  -57.59   35.60
  16 -13  -1  -49.70   42.10
 -13 -16  -1  -46.30   35.60
  13  16  -1  -69.19   33.90
 -16  13  -1  -18.50   22.60
  12  16   1  -39.10   32.10
 -16  12   1  -16.00   22.20
  16 -12   1   59.49   46.40
 -12 -16   1   18.40   76.89
  16 -12   1   41.00   48.30
 -16  12   1   57.59   42.40
 -12 -16   1   40.70   45.80
  12  16   1  -36.50   37.30
  12  16  -1   16.00   28.80
 -16  12  -1  -35.80   25.00
 -12 -16  -1  -48.00   31.10
  16 -12  -1  -41.10   33.80
  12  16  -1   13.00   33.80
 -12 -16  -1  -50.79   38.50
 -16  12  -1  -10.40   28.30
  16 -12  -1  -13.10   35.70
  11  16   1   16.90   35.80
  11  16   1  -28.80   46.20
 -16  11   1   30.30   30.50
  16 -11   1  -10.00   34.40
 -11 -16   1    4.30   32.40
  16 -11   1    0.60   37.10
 -11 -16   1   -9.60   36.60
 -16  11   1  -15.70   25.90
  11  16  -1   25.60   32.30
  11  16  -1   11.30   35.70
 -11 -16  -1  -51.49   35.40
 -11 -16  -1   14.10   36.60
 -16  11  -1    4.00   30.00
  16 -11  -1    0.90   36.80
  16 -11  -1  -23.30   33.80
 -16  11  -1  -12.90   25.10
 -16  10   1   29.20   28.30
 -10 -16   1    2.60   35.00
  16 -10   1   19.80   37.60
  16 -10   1  -25.90   32.00
  10  16   1  -23.40   31.00
 -16  10   1   -3.90   24.90
 -10 -16   1   -1.10   32.70
  10  16   1    1.80   30.60
 -10 -16  -1    9.50   33.30
  10  16  -1  -32.20   30.30
  10  16  -1  -19.00   34.10
  16 -10  -1  -49.10   31.00
 -16  10  -1  -24.70   26.30
 -16  10  -1   16.20   26.70
  16 -10  -1  -45.90   32.20
  -9 -16   1  -39.20   29.80
 -16   9   1   21.80   23.60
   9  16   1   24.10   32.60
   9  16   1  -16.10   30.20
  16  -9   1    9.70   37.70
 -16   9   1    6.50   24.00
  -9 -16   1   24.70   47.40
  16  -9   1  -20.30   45.00
   9  16  -1  -10.10   29.00
  -9 -16  -1   -1.00   35.40
   9  16  -1   54.49   36.90
 -16   9  -1   32.00   31.50
 -16   9  -1   34.10   27.70
  -9 -16  -1   47.60   39.40
  16  -9  -1   37.70   38.00
  16  -9  -1   32.70   35.90
 -16   8   1  -25.70   23.00
 -16   8   1   -9.00   23.40
  16  -8   1  -44.10   30.30
   8  16   1  -30.80   25.30
  -8 -16   1  -25.10   29.00
  16  -8   1    2.70   32.00
  -8 -16   1    7.70   40.30
   8  16   1   -0.20   29.80
   8  16  -1    8.40   31.90
 -16   8  -1   56.99   27.30
  16  -8  -1  -30.30   29.30
  -8 -16  -1   -8.10   30.70
   8  16  -1    9.70   31.70
  16  -8  -1  -58.59   29.20
 -16   8  -1   -8.10   28.90
  -8 -16  -1  -35.70   31.40
 -16   7   1  -20.00   21.90
   7  16   1   20.20   30.50
  16  -7   1   71.49   33.00
  -7 -16   1  -17.00   35.30
  -7 -16   1    3.50   27.60
 -16   7   1   18.80   22.10
  16  -7   1   33.30   30.10
   7  16   1   26.00   29.00
 -16   7  -1   10.00   26.50
 -16   7  -1  -13.00   22.30
  16  -7  -1   13.50   31.80
  -7 -16  -1   11.50   30.90
   7  16  -1    3.60   26.20
  -7 -16  -1  -52.09   28.50
   7  16  -1   19.40   29.80
  16  -7  -1  -25.70   23.90
  -6 -16   1  -16.30   26.60
  16  -6   1    7.50   37.70
  16  -6   1  -20.60   27.90
 -16   6   1   20.70   23.30
  -6 -16   1  -31.20   33.10
   6  16   1  -39.00   24.10
   6  16   1   -8.50   25.40
 -16   6   1    5.60   23.70
  16  -6  -1   41.40   36.30
 -16   6  -1   12.10   26.10
  -6 -16  -1   41.70   35.70
  -6 -16  -1   -8.30   33.80
   6  16  -1  -29.50   26.60
 -16   6  -1  -13.70   24.20
   6  16  -1  -45.40   26.60
  16  -6  -1   13.60   28.80
  -5 -16   1  -22.30   25.50
  16  -5   1   20.90   30.90
  16  -5   1  -23.10   31.20
 -16   5   1  -23.00   19.80
 -16   5   1   10.80   22.40
   5  16   1   -9.90   28.10
   5  16   1    4.40   26.90
  -5 -16   1   60.19   36.30
  16  -5  -1   70.99   39.90
   5  16  -1   16.80   29.70
 -16   5  -1   30.80   26.80
  16  -5  -1  -20.20   35.10
  -5 -16  -1  -34.40   30.20
 -16   5  -1  -54.89   25.10
   5  16  -1  -19.90   29.60
   4  16   1   50.19   34.60
  16  -4   1   38.80   35.60
  16  -4   1   14.50   30.40
  -4 -16   1  -13.90   32.10
  -4 -16   1  -18.00   26.40
 -16   4   1   24.20   25.80
   4  16   1  -19.80   26.40
 -16   4   1   45.10   29.10
 -16   4  -1    1.80   22.40
   4  16  -1    2.50   26.80
 -16   4  -1   58.99   30.20
  16  -4  -1   42.20   39.10
  -4 -16  -1   14.80   32.40
   4  16  -1   56.69   33.80
  -4 -16  -1    3.90   31.50
  16  -4  -1    8.20   33.50
   3  16   1   -6.60   27.10
  -3 -16   1  -16.10   29.30
 -16   3   1    9.80   26.00
  -3 -16   1   32.40   30.40
   3  16   1   -8.80   26.90
  16  -3   1   39.40   33.10
 -16   3   1   29.50   25.90
  16  -3   1   34.80   29.00
   3  16  -1   18.60   28.20
   3  16  -1   -5.00   33.20
  -3 -16  -1   45.30   33.70
  16  -3  -1   -5.20   32.10
 -16   3  -1    0.40   19.80
 -16   3  -1   64.69   31.90
  16  -3  -1   77.59   34.60
  -3 -16  -1   85.79   37.20
 -16   2   1   46.30   24.60
  16  -2   1   15.00   25.10
  16  -2   1   22.90   30.00
   2  16   1   35.90   30.20
  -2 -16   1   11.70   28.80
 -16   2   1   45.30   26.00
   2  16   1   17.00   25.60
 -16   2  -1   43.90   29.00
  16  -2  -1   59.19   30.50
  16  -2  -1   75.49   36.30
 -16   2  -1  110.49   45.50
   2  16  -1   65.69   34.70
  -2 -16  -1    6.40   29.20
  -2 -16  -1   56.99   31.60
 -16   1   1   61.09   27.70
  16  -1   1   27.10   24.60
  16  -1   1   80.69   34.80
  -1 -16   1   33.30   33.60
   1  16   1   68.19   33.10
 -16   1   1   68.69   28.50
   1  16   1   53.59   29.30
  16  -1  -1   71.69   36.00
 -16   1  -1   22.90   46.00
   1  16  -1   35.20   38.40
  16  -1  -1   78.29   31.10
   1  16  -1   42.20   32.10
 -16   1  -1   74.39   33.10
  -1 -16  -1   77.79   32.10
   0 -16   1  153.98   36.80
   0 -16   1  159.48   40.30
  16   0   1  169.88   37.50
  16   0   1  169.48   39.80
 -16   0   1  160.98   33.30
 -16   0   1  180.28   38.30
   0  16   1  160.78   38.90
   0  16   1  156.68   37.80
   0 -16  -1  177.58   40.90
  16   0  -1  139.19   40.60
   0  16  -1  125.79   42.30
  16   0  -1  153.08   37.20
   0  16  -1  146.39   39.60
 -16   0  -1  203.48   39.50
 -16  -1   1   34.10   24.90
  16   1   1   48.70   31.50
 -16  -1   1   79.79   33.50
  -1  16   1    5.90   29.30
   1 -16   1  103.39   34.00
   1 -16   1   66.69   34.10
  -1  16   1   32.20   27.30
  16   1   1   66.69   31.50
   1 -16  -1   62.99   35.30
  -1  16  -1   39.00   34.80
 -16  -1  -1   74.19   32.10
  16   1  -1   52.39   34.40
   1 -16  -1   -7.90   30.00
  -1  16  -1   76.19   35.70
  16   1  -1   99.79   34.20
  16   2   1   37.70   29.50
 -16  -2   1   17.30   21.90
  -2  16   1   -2.30   28.80
  16   2   1   55.79   32.60
   2 -16   1   41.00   31.30
  -2  16   1   33.70   26.60
 -16  -2   1   -4.90   27.60
   2 -16   1   49.30   32.50
   2 -16  -1   -4.00   30.20
   2 -16  -1   33.00   32.50
  -2  16  -1   57.19   45.60
 -16  -2  -1   50.09   31.30
 -16  -2  -1   57.19   55.49
  -2  16  -1   38.60   31.50
  16   2  -1    9.50   31.40
  16   2  -1   14.80   28.40
   3 -16   1    1.20   26.90
  16   3   1    9.70   30.00
  -3  16   1  -20.00   28.00
   3 -16   1  -27.20   29.80
 -16  -3   1  -37.10   24.10
  16   3   1  -24.90   24.30
  -3  16   1   41.10   27.40
 -16  -3   1   20.50   23.70
 -16  -3  -1   19.30   28.80
 -16  -3  -1  -16.60   31.40
  -3  16  -1   25.40   30.40
   3 -16  -1  -24.60   25.40
   3 -16  -1   19.00   29.90
  -3  16  -1  -22.60   38.50
  16   3  -1   20.10   32.90
  -4  16   1  -16.60   22.80
  16   4   1    8.10   32.10
 -16  -4   1   16.90   26.40
  -4  16   1  -31.40   25.00
  16   4   1   -2.10   29.80
 -16  -4   1   49.00   31.40
   4 -16   1  -27.60   32.20
   4 -16   1   -1.20   27.50
 -16  -4  -1   27.10   30.90
 -16  -4  -1    3.50   26.30
  -4  16  -1   14.50   29.50
  16   4  -1   48.10   34.60
   4 -16  -1   17.10   32.80
   4 -16  -1   -8.70   30.20
  -4  16  -1   47.00   31.60
  16   4  -1  -15.90   33.70
 -16  -5   1  -15.00   25.80
 -16  -5   1    6.50   30.40
   5 -16   1   23.70   36.30
  -5  16   1   16.50   26.20
  16   5   1   -1.90   29.80
   5 -16   1   19.40   31.50
  16   5   1  -35.10   25.00
  -5  16   1   -7.80   30.70
  16   5  -1    1.00   26.70
  -5  16  -1    8.30   31.30
  16   5  -1   31.30   31.70
   5 -16  -1   44.00   39.20
 -16  -5  -1   35.00   30.50
   5 -16  -1    9.90   30.40
  -5  16  -1   14.20   24.90
 -16  -5  -1   79.99   35.20
   6 -16   1  -10.20   30.20
 -16  -6   1   29.00   28.40
   6 -16   1   40.80   35.50
  -6  16   1   -4.50   30.40
  16   6   1   37.70   28.60
  -6  16   1  -12.80   23.10
  16   6   1   64.69   37.20
 -16  -6   1   11.80   27.60
  16   6  -1   50.69   33.20
   6 -16  -1   42.40   36.40
 -16  -6  -1   33.80   31.30
   6 -16  -1   48.60   59.09
 -16  -6  -1   25.00   31.90
  -6  16  -1  -49.00   26.40
  16   6  -1   -3.00   32.20
  -6  16  -1    6.80   25.90
  -7  16   1    1.80   24.60
  16   7   1   64.89   33.30
   7 -16   1   63.99   39.10
   7 -16   1   36.40   32.30
  16   7   1   14.20   31.50
 -16  -7   1  -37.50   27.30
 -16  -7   1   33.50   29.40
  -7  16   1   47.70   32.30
   7 -16  -1   91.99   37.90
  16   7  -1   11.80   29.90
   7 -16  -1   59.19   35.60
 -16  -7  -1   48.20   34.30
  16   7  -1   43.40   36.80
  -7  16  -1   -0.20   30.30
  -7  16  -1   14.90   28.20
 -16  -7  -1   61.39   35.60
  -8  16   1  -18.40   23.50
 -16  -8   1   45.50   35.20
  16   8   1  -37.20   27.90
 -16  -8   1  -37.70   27.60
   8 -16   1   -9.30   28.50
   8 -16   1   73.99   51.19
  16   8   1   21.60   33.00
  -8  16  -1    5.70   32.80
 -16  -8  -1   20.50   33.60
   8 -16  -1   12.60   34.80
  16   8  -1   44.10   33.30
  -8  16  -1   10.50   29.00
  16   8  -1    9.50   32.50
   8 -16  -1  -51.69   28.70
 -16  -8  -1  -65.39   26.20
 -16  -9   1   -7.70   34.30
  16   9   1   22.70   30.60
   9 -16   1   46.00   38.50
  -9  16   1   -4.00   23.70
  16   9   1  -25.10   25.80
   9 -16   1  -12.20   33.90
 -16  -9   1   42.70   32.10
  -9  16   1   36.10   35.00
   9 -16  -1    7.40   36.30
  -9  16  -1   76.29   34.10
 -16  -9  -1   73.49   37.00
 -16  -9  -1   49.10   35.00
  16   9  -1   50.29   33.80
  -9  16  -1  -37.10   32.60
   9 -16  -1   31.90   33.90
  16   9  -1   42.90   34.90
 -16 -10   1    2.30   38.40
  16  10   1  -22.90   31.90
  10 -16   1   29.80   39.80
 -16 -10   1   -2.40   32.40
 -10  16   1  -14.50   25.30
  16  10   1  -81.59   29.20
 -10  16   1  -47.20   29.10
  10 -16   1   16.90   34.50
  16  10  -1   52.19   34.90
 -10  16  -1  -69.19   30.90
 -16 -10  -1   85.89   35.70
  10 -16  -1    6.80   37.30
  16  10  -1   49.99   35.40
 -16 -10  -1   15.40   37.20
  10 -16  -1   -8.90   32.40
 -10  16  -1   59.39   33.90
 -11  16   1   28.80   28.20
  11 -16   1   26.50   43.20
  16  11   1  -57.89   46.20
 -16 -11   1  -48.70   34.70
 -16 -11   1  -35.20   29.40
 -11  16   1  -42.00   32.90
  11 -16   1  -31.20   33.80
  16  11   1   31.20   40.60
 -16 -11  -1    4.10   33.40
  16  11  -1   14.10   38.20
  11 -16  -1   68.39   38.30
  11 -16  -1  -70.19   31.20
 -11  16  -1  -15.90   25.00
 -11  16  -1  -38.60   32.40
  16  11  -1   18.30   32.50
 -16 -11  -1  -52.89   27.30
  16  12   1  -30.20   33.80
 -12  16   1   -7.20   32.40
 -12  16   1   15.90   39.10
  16  12   1  -45.00   29.50
  12 -16   1  -38.00   40.70
  12 -16   1  -53.09   33.30
 -16 -12   1   31.70   40.10
 -16 -12   1   26.60   40.90
  12 -16  -1  -49.90   33.90
  16  12  -1  -21.70   31.30
 -16 -12  -1   30.50   35.00
  16  12  -1   17.80   34.90
  12 -16  -1  -64.09   38.50
 -12  16  -1   25.70   29.90
  13 -16   1   37.20   42.70
 -16 -13   1   -1.30   39.80
 -16 -13   1  -29.60   35.40
  13 -16   1 -104.99   37.60
  16  13   1  -43.60   32.80
 -13  16   1   10.90   28.00
  16  13   1  -32.60   38.40
  13 -16  -1  -18.70   39.90
  16  13  -1  -86.19   34.00
  16  13  -1  -48.30   30.10
 -16 -13  -1  -50.89   34.00
 -13  16  -1  -39.90   27.40
  13 -16  -1   38.30   43.70
 -16 -14   1  -86.79   33.50
 -14  16   1   24.50   31.80
  16  14   1   -5.80   36.10
 -16 -14   1  -37.60   43.80
  14 -16   1  -18.10   38.40
 -16 -14  -1   -9.80   36.50
 -16 -14  -1  -54.89   34.90
  16  14  -1   20.30   37.80
  14 -16  -1   -7.40   41.30
  15 -16   1 -104.39   41.50
 -16 -15   1  -48.40   42.70
  15 -16  -1   -5.60   44.80
  16  15  -1  -62.49   40.70
 -16 -15  -1   -1.30   67.99
 -15  16  -1  -59.49   30.70
  16  15  -1  -44.00   33.20
 -16 -15  -1  -11.40   48.70
  16 -16  -1  -53.39   53.19
 -16 -16  -1  -53.29   51.29
  16 -16  -1  -73.29   42.90
 -16 -16  -1  -42.60   42.10
  16  16  -1  -83.79   44.90
  16  16  -1  -80.69   43.60
  15  17  -1  -63.79   51.09
  17 -15  -1  -77.39   46.70
 -15 -17  -1  -61.59   51.19
  15  17  -1  -99.89   47.00
 -15 -17  -1  -98.09   42.30
  17 -15  -1  -19.50   57.39
  17 -14   1    4.40   50.39
  14  17  -1 -116.49   39.90
 -17  14  -1  -10.90   25.80
  14  17  -1  -14.20   34.00
  17 -14  -1  -27.10   50.59
  17 -14  -1  -85.49   42.20
 -17  14  -1  -23.60   32.60
 -14 -17  -1  -61.69   42.70
  17 -13   1  -10.70   42.10
  13  17   1  -21.10   33.90
 -17  13   1   10.10   34.90
 -13 -17   1  -58.59   32.20
  17 -13   1  -87.29   38.10
  17 -13  -1   -2.50   46.50
  13  17  -1   47.30   36.20
 -13 -17  -1 -117.19   48.80
 -17  13  -1  -17.80   35.40
 -13 -17  -1   -9.80   42.10
  13  17  -1  -29.40   44.00
  17 -13  -1   15.20   48.40
 -17  13  -1  -21.60   29.60
  17 -12   1   -0.80   39.50
 -17  12   1  -46.50   28.10
  12  17   1   53.89   40.70
 -12 -17   1  -47.30   40.30
 -17  12   1   -4.70   31.00
  17 -12   1  -73.49   39.50
 -12 -17   1  -84.99   35.80
  12  17   1  -41.80   33.60
 -12 -17  -1  -86.89   33.90
 -17  12  -1  -61.19   24.50
  17 -12  -1    0.00   38.50
  12  17  -1   43.00   38.20
 -12 -17  -1  -58.49   37.60
  12  17  -1   -6.70   30.10
 -17  12  -1  -30.70   25.90
  17 -12  -1   54.29   43.10
  11  17   1   17.70   38.60
 -11 -17   1  -22.80   34.60
 -17  11   1  -58.09   21.60
 -17  11   1    0.90   28.30
 -11 -17   1   32.50   44.30
  17 -11   1   36.40   44.60
  11  17   1   12.00   33.70
  17 -11   1  -31.90   36.20
 -17  11  -1  -25.80   24.80
  17 -11  -1  -22.50   37.20
  11  17  -1  -27.50   32.40
  11  17  -1  -15.30   28.80
 -17  11  -1  -29.80   25.90
 -11 -17  -1  -38.50   35.80
  17 -11  -1    7.40   36.70
 -11 -17  -1   16.00   39.70
  17 -10   1  -75.19   31.70
  10  17   1  -85.59   48.00
 -10 -17   1    2.70   34.40
 -10 -17   1   26.10   41.60
  10  17   1  -24.40   38.20
 -17  10   1    6.60   34.50
  17 -10   1  -27.10   33.40
 -17  10   1   -0.60   28.70
  10  17  -1  -25.30   33.10
 -17  10  -1    0.20   24.90
 -17  10  -1   41.40   34.00
  17 -10  -1  -35.40   31.90
 -10 -17  -1  -40.40   32.20
  10  17  -1  -12.10   29.40
  17 -10  -1   21.20   40.40
 -10 -17  -1  -43.30   32.90
   9  17   1   30.60   32.90
  17  -9   1  -26.50   33.50
  -9 -17   1  -55.39   31.60
  17  -9   1  -50.39   32.50
  -9 -17   1  -73.99   29.80
  -9 -17  -1  -46.90   32.20
  -9 -17  -1  -60.89   32.20
 -17   9  -1   26.20   24.60
  17  -9  -1   38.40   37.00
   9  17  -1  -30.20   29.80
  17  -9  -1  -42.00   26.70
   9  17  -1  -57.79   32.20
 -17   9  -1  -53.69   27.80
  -8 -17   1  -16.90   32.00
 -17   8   1   -6.00   22.70
  -8 -17   1  -48.60   35.60
  17  -8   1   -8.00   27.90
  17  -8   1    9.70   33.60
 -17   8   1  -40.00   21.30
   8  17   1   38.50   32.40
  -8 -17  -1  -37.70   33.50
  -8 -17  -1   40.50   38.30
   8  17  -1    4.20   33.80
   8  17  -1   24.40   31.40
  17  -8  -1   42.50   38.00
 -17   8  -1   -3.90   29.00
 -17   8  -1   11.00   23.90
  17  -8  -1  -14.30   26.40
 -17   7   1   38.30   26.80
  17  -7   1  -64.49   29.90
 -17   7   1  -50.99   20.00
  -7 -17   1  -16.50   33.80
  -7 -17   1    1.70   37.80
   7  17   1   -5.20   27.30
  17  -7   1  -59.49   44.80
   7  17   1   12.70   32.90
 -17   7  -1   25.70   28.60
   7  17  -1   -0.30   28.50
  -7 -17  -1    0.80   31.10
 -17   7  -1   19.70   25.30
   7  17  -1   32.10   34.00
  -7 -17  -1   16.90   37.40
  17  -7  -1   19.90   29.50
  17  -7  -1   53.39   39.40
  17  -6   1    6.50   31.20
  -6 -17   1    3.70   29.80
  17  -6   1  -61.49   36.70
 -17   6   1   15.00   20.70
 -17   6   1   -3.20   21.70
   6  17   1  -13.30   25.50
   6  17   1    5.80   26.60
 -17   6  -1  -17.90   27.20
  17  -6  -1    6.60   33.00
   6  17  -1  -47.00   28.00
  -6 -17  -1   20.50   32.50
   6  17  -1  -23.20   28.20
  17  -6  -1  -36.60   33.70
 -17   6  -1   -5.30   23.20
  -6 -17  -1    5.50   35.50
  17  -5   1  -17.40   33.50
  -5 -17   1   -5.60   36.00
   5  17   1  -23.20   28.60
  17  -5   1   -0.50   31.90
   5  17   1   28.10   28.00
  -5 -17   1   -1.70   29.00
 -17   5   1   -7.90   21.50
 -17   5   1    6.90   24.60
  17  -5  -1  -45.70   30.90
 -17   5  -1   -7.60   29.80
  -5 -17  -1  -11.40   32.50
  17  -5  -1   44.20   40.40
  -5 -17  -1   40.40   36.30
   5  17  -1   21.00   33.90
   5  17  -1    1.80   27.60
 -17   5  -1   -8.60   21.80
  -4 -17   1   26.90   31.10
   4  17   1  -30.90   24.20
 -17   4   1   -3.20   24.10
  17  -4   1    6.40   33.80
   4  17   1  -35.20   24.80
 -17   4   1  -23.10   20.30
  -4 -17   1  -22.50   34.00
  17  -4   1  -16.10   27.80
  17  -4  -1   42.40   33.30
  17  -4  -1  -25.20   29.80
   4  17  -1   42.70   28.70
 -17   4  -1   19.90   28.10
  -4 -17  -1   52.79   35.40
   4  17  -1   18.00   29.10
  -4 -17  -1   17.50   32.20
 -17   4  -1    1.60   20.50
   3  17   1   -1.30   28.00
 -17   3   1    0.50   19.70
  17  -3   1  -21.50   32.10
  17  -3   1   17.70   30.90
  -3 -17   1  -15.60   33.70
  -3 -17   1   11.30   31.10
   3  17   1   50.59   30.20
 -17   3   1   -4.80   23.50
 -17   3  -1    5.30   18.90
  -3 -17  -1  -46.70   27.80
   3  17  -1  -31.60   25.60
   3  17  -1  -29.30   27.90
 -17   3  -1   -7.40   26.10
  -3 -17  -1    7.80   30.70
  17  -3  -1  -10.50   32.60
  17  -3  -1   30.90   32.10
   2  17   1  -32.80   24.70
 -17   2   1   23.80   22.50
  17  -2   1   15.80   33.70
  -2 -17   1   -5.20   27.50
   2  17   1   49.60   29.20
  17  -2   1   33.20   31.10
 -17   2   1   38.40   28.00
  17  -2  -1   34.00   34.20
   2  17  -1   -4.10   30.90
 -17   2  -1   18.50   24.80
  -2 -17  -1   -5.10   31.80
   2  17  -1   28.60   29.50
  -2 -17  -1   27.00   37.30
 -17   2  -1   43.10   30.50
  17  -2  -1   35.20   34.50
   1  17   1   70.89   30.90
  17  -1   1  -15.90   29.90
   1  17   1  -34.40   25.60
 -17   1   1   47.40   27.80
  -1 -17   1  -40.00   29.20
  17  -1   1   43.80   31.90
 -17   1   1  -19.80   24.50
 -17   1  -1  -24.30   26.20
   1  17  -1   46.70   31.90
  17  -1  -1  -46.90   29.00
  17  -1  -1   56.89   37.60
   1  17  -1  -23.60   30.10
 -17   1  -1   -5.10   27.00
  -1 -17  -1   -3.20   55.09
   0 -17   1   -7.60   32.10
   0  17   1   17.50   30.50
 -17   0   1   10.40   27.40
 -17   0   1   50.09   24.40
   0 -17   1   37.30   32.30
   0  17   1   17.90   26.80
  17   0   1   56.69   33.00
  17   0   1   97.09   37.20
  17   0  -1   28.80   35.50
   0  17  -1   56.49   32.10
  17   0  -1  110.89   41.50
 -17   0  -1   47.40   32.20
   0  17  -1  -15.80   29.90
 -17   0  -1   88.69   34.00
   1 -17   1  -33.40   26.90
 -17  -1   1   52.79   25.80
  -1  17   1   -8.60   24.20
 -17  -1   1  -30.80   23.00
  17   1   1    3.60   27.80
  -1  17   1  -49.20   24.40
   1 -17   1   -3.30   32.70
  17   1   1   30.90   31.60
  17   1  -1   26.10   32.70
   1 -17  -1   34.20   42.30
 -17  -1  -1   13.80   29.70
  -1  17  -1  -66.79   28.30
  -1  17  -1   -2.90   25.80
  17   1  -1   15.50   31.30
 -17  -1  -1   14.40   28.80
   1 -17  -1   -0.70   32.90
  -2  17   1   17.90   26.80
   2 -17   1    0.00   30.30
  17   2   1   14.10   29.00
 -17  -2   1   -6.40   26.80
  17   2   1   -2.90   32.10
 -17  -2   1   10.30   24.60
  -2  17   1  -42.20   24.90
   2 -17   1   26.70   33.20
   2 -17  -1   21.30   34.90
 -17  -2  -1  -10.30   28.40
 -17  -2  -1  -10.70   27.10
  17   2  -1  -12.40   30.60
  -2  17  -1   11.20   32.90
   2 -17  -1    3.80   40.70
  -2  17  -1   31.30   29.10
  17   2  -1   84.29   36.30
   3 -17   1   10.70   30.90
  -3  17   1  -37.40   26.20
 -17  -3   1   29.70   26.50
   3 -17   1   19.90   35.90
  17   3   1   24.10   32.40
 -17  -3   1   20.80   29.10
  17   3   1  -29.90   24.80
  -3  17   1    2.10   26.00
 -17  -3  -1   25.80   31.10
  -3  17  -1   21.60   28.10
  17   3  -1  -27.30   32.20
   3 -17  -1   -3.80   30.80
  -3  17  -1  -14.60   27.10
 -17  -3  -1  -19.70   28.50
   3 -17  -1   -3.20   30.60
  17   3  -1  -26.20   27.90
   4 -17   1   15.10   31.40
  -4  17   1  -27.30   22.00
   4 -17   1  -87.69   30.10
 -17  -4   1   19.70   29.20
 -17  -4   1  -17.10   23.70
  17   4   1   23.80   32.40
  17   4   1   61.49   34.60
  17   4  -1  -11.40   30.10
   4 -17  -1  -13.30   30.40
  -4  17  -1   -5.30   26.30
   4 -17  -1  -40.70   26.40
  -4  17  -1   -7.30   26.40
  17   4  -1   25.70   36.80
 -17  -4  -1   -8.50   29.90
 -17  -4  -1   15.10   30.80
   5 -17   1  -31.40   28.00
  -5  17   1   -8.30   24.30
  17   5   1   43.20   29.80
 -17  -5   1   -5.10   26.10
  17   5   1   27.70   33.90
 -17  -5   1  -38.90   23.00
  -5  17   1  -42.20   26.90
   5 -17   1  -29.20   41.70
   5 -17  -1  -42.40   32.60
 -17  -5  -1   14.90   30.30
  -5  17  -1   24.30   29.10
  -5  17  -1   -1.70   32.50
   5 -17  -1  -63.59   28.40
  17   5  -1  -37.80   24.70
 -17  -5  -1   12.80   34.60
  17   5  -1  -12.80   32.00
 -17  -6   1   15.50   27.80
  -6  17   1    4.10   28.20
  -6  17   1   15.60   26.50
  17   6   1  -47.30   25.30
 -17  -6   1  -43.70   29.80
   6 -17   1   59.49   36.00
  17   6   1   23.90   33.00
   6 -17   1   55.39   45.40
   6 -17  -1  -41.20   32.70
   6 -17  -1  -42.40   27.80
 -17  -6  -1   48.80   34.80
 -17  -6  -1  -15.50   26.50
  17   6  -1   10.10   30.60
  17   6  -1   42.10   33.10
  -6  17  -1   11.80   27.20
  -7  17   1  -15.30   23.70
  17   7   1   22.90   34.20
   7 -17   1   -4.50   34.30
  17   7   1    4.70   27.80
   7 -17   1  -37.20   29.00
  -7  17   1  -23.80   33.00
 -17  -7   1   64.69   33.20
 -17  -7   1  -18.80   25.90
  17   7  -1   77.59   37.20
  -7  17  -1   16.40   30.90
  -7  17  -1  -19.90   33.70
   7 -17  -1   46.50   36.10
  17   7  -1  -17.20   33.30
 -17  -7  -1  -35.30   30.90
   7 -17  -1   89.49   37.70
 -17  -7  -1   11.70   31.60
  17   8   1   -3.80   35.10
 -17  -8   1   10.70   32.60
   8 -17   1  -41.40   34.50
  -8  17   1   14.50   27.30
  -8  17   1  -78.29   29.50
  17   8   1  -42.50   31.90
   8 -17   1  -28.50   30.10
  -8  17  -1   14.30   27.20
   8 -17  -1   16.30   35.10
  17   8  -1   40.50   35.90
   8 -17  -1  -65.49   31.30
 -17  -8  -1   58.79   38.40
  -8  17  -1  -56.39   32.50
  17   8  -1  -37.60   33.50
 -17  -8  -1   -8.70   33.10
 -17  -9   1  -42.10   33.30
   9 -17   1    0.20   34.90
  -9  17   1   -4.70   27.00
   9 -17   1  -32.10   34.40
 -17  -9   1   -6.10   30.70
  17   9   1   21.50   47.90
  17   9   1   -4.10   32.20
  -9  17   1  -30.80   41.10
  17   9  -1  -45.20   34.70
  -9  17  -1  -65.29   30.90
   9 -17  -1  -76.89   32.90
  17   9  -1   -0.30   34.20
 -17  -9  -1  -37.10   30.50
  -9  17  -1   28.40   31.90
   9 -17  -1  -19.00   38.20
 -10  17   1  -72.09   31.10
  10 -17   1   13.30   42.80
  10 -17   1  -53.19   32.90
 -17 -10   1    5.80   37.60
 -10  17   1   36.00   28.90
  17  10   1   35.60   36.00
  17  10   1  -71.69   30.50
  17  10  -1  -32.10   34.50
  10 -17  -1  -71.39   34.20
  17  10  -1  -18.10   29.70
  10 -17  -1  -75.39   31.30
 -10  17  -1  -51.69   34.30
 -17 -10  -1   -2.60   35.50
 -10  17  -1   36.70   34.00
 -17 -10  -1  -45.00   32.90
  17  11   1  -34.10   37.00
 -17 -11   1    2.80   34.80
  11 -17   1 -103.49   36.00
 -11  17   1  -48.10   32.10
 -17 -11   1  148.69   49.80
  17  11   1   -1.10   34.50
 -11  17   1   28.80   41.70
 -17 -11  -1  -51.29   35.60
  11 -17  -1   42.30   39.30
 -11  17  -1  -58.29   37.60
  17  11  -1   61.49   37.50
 -17 -11  -1   59.99   38.90
 -11  17  -1  -12.70   24.60
  11 -17  -1  -82.09   32.90
  17  12   1  -91.79   35.80
  12 -17   1    9.40   41.20
  17  12   1    8.70   38.70
 -17 -12   1   -7.00   39.10
 -12  17   1   28.20   30.60
 -17 -12   1  -52.49   36.50
  12 -17   1  -85.79   41.90
  12 -17  -1 -108.69   37.10
  12 -17  -1   24.60   42.20
 -17 -12  -1  -22.20   38.40
 -17 -12  -1  -86.99   33.60
 -12  17  -1    7.00   50.39
  17  12  -1   46.50   37.40
 -12  17  -1  -40.10   26.70
  17  12  -1  -67.19   35.10
 -17 -13   1  -92.39   41.80
 -13  17   1  -35.80   27.70
 -17 -13   1  108.89   53.09
  13 -17   1  -50.29   43.30
  17  13   1  -91.49   33.80
 -13  17  -1  -39.10   37.60
  13 -17  -1  -15.20   50.69
 -17 -13  -1  -38.40   36.60
  17  13  -1  -86.29   33.40
  13 -17  -1  -89.89   36.90
 -17 -13  -1    3.60   43.20
 -13  17  -1  -43.70   28.20
 -17 -14   1  -81.09   54.19
  14 -17   1  -91.99   41.20
 -14  17  -1   -2.00   32.70
 -17 -14  -1  -37.00   43.60
  14 -17  -1   -4.30   49.30
  17  14  -1  -55.89   43.70
  17  14  -1  -15.70   38.30
  14 -17  -1  -79.79   44.40
 -17 -14  -1  -62.19   41.80
  17  15  -1  -68.39   43.50
 -17 -15  -1  -50.69   44.90
 -17 -15  -1 -118.29   51.29
  15 -17  -1  -71.19   53.19
  18 -14  -1  -13.10   46.80
  18 -14  -1  -92.19   62.19
 -14 -18  -1  -57.99   51.19
 -14 -18  -1 -121.29   43.90
  18 -13   1  -93.89   46.10
  18 -13  -1   39.00   61.69
 -13 -18  -1 -101.69   40.40
 -13 -18  -1  -34.60   41.60
  13  18  -1   17.70   41.60
  18 -13  -1  -43.00   41.10
 -18  13  -1  -23.70   31.10
  13  18  -1   -4.90   40.10
 -18  13  -1  -69.59   32.20
 -12 -18   1 -114.69   38.40
  18 -12   1  -42.30   38.80
 -12 -18   1  -81.19   37.40
  18 -12   1  -46.90   41.70
  12  18   1  -61.19   36.00
 -18  12   1  -27.00   32.50
  12  18  -1  -18.60   40.30
 -18  12  -1  -18.50   29.50
  12  18  -1   -6.10   38.60
  18 -12  -1    2.70   43.20
 -12 -18  -1   24.70   43.60
 -12 -18  -1  -41.60   47.30
 -18  12  -1  -51.39   31.90
  18 -12  -1   -9.30   52.49
 -11 -18   1  -19.80   37.80
  11  18   1  -38.70   32.70
 -11 -18   1    6.30   41.90
 -18  11   1  -25.00   28.30
  18 -11   1  -88.19   34.00
  18 -11   1  -97.59   35.00
 -18  11  -1  -27.40   28.80
  11  18  -1  -55.09   28.80
 -11 -18  -1  -58.99   37.70
 -11 -18  -1  -19.30   36.60
  18 -11  -1   62.79   44.60
  18 -11  -1   27.30   42.60
  18 -10   1  -32.10   32.10
  10  18   1   34.30   40.50
  10  18   1   -1.00   38.10
 -18  10   1   10.80   30.50
 -10 -18   1  -80.69   33.40
  18 -10   1   10.30   39.80
 -10 -18   1  -43.10   38.80
 -18  10   1  -24.80   24.50
  18 -10  -1  -29.30   40.60
  18 -10  -1   -2.50   32.90
  10  18  -1  -46.50   34.10
 -10 -18  -1  -48.00   34.20
  10  18  -1  -10.10   28.80
 -18  10  -1  -38.90   26.00
 -10 -18  -1   66.89   43.60
 -18  10  -1   21.10   25.20
   9  18   1   37.30   34.20
  18  -9   1    1.90   35.10
 -18   9   1  -34.60   22.50
 -18   9   1  -37.80   24.30
  -9 -18   1  -28.10   43.20
   9  18   1   22.30   38.50
   9  18  -1  -42.70   24.80
 -18   9  -1   23.40   27.50
  -9 -18  -1  -43.00   35.90
  18  -9  -1  -14.50   34.60
   9  18  -1  -47.70   32.50
  -9 -18  -1   22.10   37.00
  18  -9  -1   19.20   38.50
 -18   9  -1  -27.70   24.50
  -8 -18   1  -17.70   42.20
  -8 -18   1   44.70   37.90
  18  -8   1   18.80   36.10
 -18   8   1  -14.60   30.00
 -18   8   1   27.50   32.70
   8  18   1   19.90   51.09
  18  -8   1    8.70   43.10
   8  18  -1   -4.70   34.80
  -8 -18  -1  -21.30   35.00
  18  -8  -1  -19.60   25.70
   8  18  -1    1.30   31.10
  -8 -18  -1   88.69   42.50
 -18   8  -1   37.00   27.40
 -18   8  -1    4.40   28.70
  18  -8  -1  -10.90   36.00
   7  18   1   37.90   46.60
  18  -7   1  -56.59   36.10
  -7 -18   1  -22.20   35.10
   7  18   1  -31.50   29.90
 -18   7   1  -39.60   22.50
  -7 -18   1  -53.29   32.50
  18  -7   1  -46.80   36.10
  18  -7  -1  -14.40   35.40
  -7 -18  -1  -15.30   36.00
 -18   7  -1  -17.30   23.30
   7  18  -1   39.60   37.30
 -18   7  -1  -49.40   27.10
  18  -7  -1    0.00   36.60
  -7 -18  -1  -20.20   33.70
   7  18  -1  -27.10   28.20
   6  18   1  -10.60   27.80
  -6 -18   1  -32.20   29.40
  18  -6   1  -40.40   35.80
 -18   6   1   -5.20   21.90
  -6 -18   1  -49.00   32.30
  18  -6   1  -14.60   35.90
   6  18   1  -10.50   32.20
 -18   6   1   -8.40   22.70
   6  18  -1    3.10   29.50
  -6 -18  -1  -11.90   34.20
  18  -6  -1  -50.49   30.70
  18  -6  -1   48.90   38.40
  -6 -18  -1  -70.59   32.50
   6  18  -1    9.30   34.50
 -18   6  -1   22.80   26.50
 -18   6  -1   -9.70   33.20
   5  18   1  -19.50   27.00
  18  -5   1   31.80   40.00
 -18   5   1   -8.80   25.30
  -5 -18   1  -54.19   32.70
   5  18   1  -63.09   29.20
 -18   5   1   13.40   25.70
  -5 -18   1  -29.70   29.30
  18  -5   1  -49.80   31.00
   5  18  -1   31.90   35.60
  -5 -18  -1  -52.39   29.00
 -18   5  -1  -10.70   29.60
   5  18  -1   19.30   31.40
  -5 -18  -1  -19.30   34.00
 -18   5  -1   27.40   25.30
  18  -5  -1   21.10   38.20
  18  -5  -1    0.50   36.60
  18  -4   1   -4.20   30.60
  18  -4   1  -48.30   46.60
 -18   4   1  -15.30   23.30
   4  18   1   27.50   34.90
  -4 -18   1   -9.20   32.50
  -4 -18   1    9.20   37.10
 -18   4   1   27.00   28.30
   4  18   1    3.70   29.20
 -18   4  -1   48.50   32.20
   4  18  -1    6.20   33.60
   4  18  -1   22.00   35.10
  -4 -18  -1   45.60   38.40
  -4 -18  -1  -30.70   27.60
  18  -4  -1   20.00   35.30
 -18   4  -1  -14.80   18.70
  18  -4  -1   63.19   38.20
   3  18   1   66.09   36.30
 -18   3   1   -1.80   25.10
 -18   3   1    0.60   21.50
   3  18   1    5.30   24.80
  -3 -18   1   33.40   32.80
  18  -3   1  -39.40   30.30
  18  -3   1   10.60   44.60
  18  -3  -1    3.20   31.90
  18  -3  -1  -24.50   30.30
   3  18  -1  -35.60   32.00
 -18   3  -1   12.30   27.90
  -3 -18  -1   27.40   36.80
  -3 -18  -1   25.80   38.20
 -18   3  -1   26.90   28.70
   3  18  -1  -53.39   27.50
 -18   2   1   18.70   22.50
   2  18   1   82.09   34.50
  18  -2   1   24.60   33.90
   2  18   1   -0.30   28.30
  -2 -18   1   24.70   32.20
 -18   2   1   43.00   26.30
  18  -2   1   40.30   36.30
   2  18  -1  -33.50   24.60
  -2 -18  -1   35.30   34.00
  18  -2  -1   31.00   33.60
 -18   2  -1   10.80   22.40
 -18   2  -1   32.70   30.70
  18  -2  -1   29.50   34.60
  -1 -18   1  -59.49   26.10
   1  18   1   -9.60   25.40
 -18   1   1   18.70   24.10
 -18   1   1   31.70   32.10
   1  18   1   13.60   29.00
  18  -1   1   40.80   31.60
  18  -1   1    9.80   32.90
   1  18  -1    1.10   28.70
  18  -1  -1   32.80   34.50
  -1 -18  -1  -66.69   26.80
  18  -1  -1   37.40   34.10
   1  18  -1  -69.99   27.80
 -18   1  -1   48.10   30.30
 -18   1  -1  -19.70   30.20
   0  18   1   -8.30   26.70
   0 -18   1  224.08   71.39
  18   0   1   13.70   32.80
 -18   0   1   31.70   24.00
   0  18   1   48.60   32.50
   0 -18   1   17.60   30.20
 -18   0   1   79.19   36.10
  18   0   1   -2.90   31.50
   0 -18  -1   59.49   39.30
 -18   0  -1   83.99   34.30
 -18   0  -1   35.30   34.70
  18   0  -1    4.90   32.60
   0 -18  -1   43.50   34.90
   0  18  -1   40.10   31.50
  18   0  -1   27.80   36.30
   0  18  -1   73.09   38.30
  18   1   1   23.80   33.70
 -18  -1   1   32.40   27.40
   1 -18   1   -0.30   44.40
  -1  18   1   -9.00   25.30
  -1  18   1   -0.80   27.30
 -18  -1   1  -53.09   26.10
  18   1   1   26.70   34.30
   1 -18   1   35.00   33.30
  -1  18  -1  -17.00   26.90
   1 -18  -1   21.80   36.40
  -1  18  -1  -30.00   29.40
   1 -18  -1    4.10   32.40
 -18  -1  -1  -22.90   29.10
 -18  -1  -1   45.40   30.40
  18   1  -1  -21.00   31.40
  18   1  -1   69.59   35.80
 -18  -2   1  -35.10   27.30
  18   2   1    3.10   33.20
  -2  18   1   26.50   26.20
   2 -18   1   59.49   45.70
 -18  -2   1   19.30   25.80
  -2  18   1  -53.09   27.60
  18   2   1  -19.90   29.40
   2 -18   1   32.90   31.80
 -18  -2  -1   -1.50   33.00
  18   2  -1   11.70   32.80
   2 -18  -1   -8.60   34.00
  -2  18  -1  -10.80   29.10
 -18  -2  -1   57.39   32.70
  18   2  -1   56.09   35.30
   2 -18  -1   14.80   36.70
  -3  18   1  -40.70   28.10
  18   3   1   16.90   34.80
   3 -18   1  -25.40   29.70
   3 -18   1   34.00   39.00
 -18  -3   1    5.70   30.20
  -3  18   1   34.70   28.30
 -18  -3   1   11.40   25.40
  -3  18  -1   -8.00   27.60
  -3  18  -1   -8.50   32.40
  18   3  -1    6.10   30.10
   3 -18  -1  -17.10   31.80
 -18  -3  -1   13.10   29.20
  18   3  -1   37.50   32.90
 -18  -3  -1  -17.10   29.10
   3 -18  -1    7.70   37.70
  18   4   1   33.20   30.50
   4 -18   1  -73.99   26.70
  18   4   1   15.60   34.80
  -4  18   1  -22.50   31.60
  -4  18   1   31.80   25.70
 -18  -4   1   10.80   29.70
 -18  -4   1  -27.30   22.50
   4 -18   1  -12.50   34.00
   4 -18  -1   -4.70   32.90
   4 -18  -1   -7.50   31.20
 -18  -4  -1  -36.40   31.60
  -4  18  -1   26.90   32.70
  -4  18  -1  -32.00   32.00
  18   4  -1  -23.00   34.00
 -18  -4  -1   19.40   31.60
  18   4  -1   51.79   37.50
 -18  -5   1    7.50   28.20
 -18  -5   1   40.30   31.30
  -5  18   1  -43.20   31.10
   5 -18   1  -11.80   31.90
   5 -18   1  -43.80   34.90
  18   5   1   -4.90   35.30
  18   5   1   69.69   36.20
  -5  18   1   57.59   28.90
  18   5  -1  -17.90   31.00
 -18  -5  -1  -25.30   33.30
  -5  18  -1    9.70   30.60
   5 -18  -1   40.10   36.30
 -18  -5  -1  -34.60   28.30
  -5  18  -1  -38.70   30.90
  18   5  -1  117.19   40.50
   5 -18  -1  -49.20   30.20
  -6  18   1   31.80   29.00
 -18  -6   1  -31.10   29.40
  18   6   1   75.59   56.89
 -18  -6   1  -47.70   30.70
  -6  18   1   37.00   58.99
  18   6   1  -31.30   29.70
   6 -18   1   10.30   36.60
   6 -18   1  -30.20   34.70
  -6  18  -1   46.80   35.70
   6 -18  -1   16.60   33.90
  18   6  -1   -1.60   34.90
   6 -18  -1  -21.40   33.80
 -18  -6  -1   -8.70   31.60
  -6  18  -1   20.80   27.30
  18   6  -1  -27.70   31.80
 -18  -6  -1   24.00   35.60
  18   7   1   42.80   34.70
   7 -18   1  -19.70   34.70
 -18  -7   1  -41.80   28.80
   7 -18   1  -17.90   36.70
  -7  18   1  -65.89   34.60
  -7  18   1  -26.60   25.00
 -18  -7   1  -35.50   30.40
  18   7   1   -4.00   34.30
 -18  -7  -1   -3.70   35.70
   7 -18  -1   -6.70   34.50
  -7  18  -1  -51.09   33.60
  18   7  -1  -24.40   31.40
  -7  18  -1   14.30   30.30
   7 -18  -1   16.90   38.00
  18   7  -1   39.50   37.70
  -8  18   1  -65.69   31.90
  -8  18   1   25.60   31.20
   8 -18   1  -30.20   35.20
  18   8   1   57.69   61.09
  18   8   1   69.59   38.70
 -18  -8   1  -14.20   38.00
   8 -18   1   -5.80   39.80
   8 -18  -1  -23.20   34.40
  18   8  -1   -9.80   35.10
 -18  -8  -1    0.40   39.10
  -8  18  -1  -59.09   35.50
 -18  -8  -1  -11.00   33.50
   8 -18  -1   10.60   39.40
  -8  18  -1   -2.60   30.20
  18   8  -1  -50.89   26.50
   9 -18   1   17.80   57.59
  18   9   1  -42.30   30.30
 -18  -9   1  -14.40   37.10
  18   9   1   21.50   36.40
  -9  18   1   -4.50   34.50
   9 -18   1   -3.50   39.90
 -18  -9   1   18.60   34.50
  -9  18  -1  -34.50   25.70
   9 -18  -1  -61.69   35.30
  18   9  -1  -55.49   36.20
  18   9  -1  -25.60   34.60
   9 -18  -1   -5.10   39.80
 -18  -9  -1  -80.89   29.90
 -18  -9  -1  -62.49   31.50
  18  10   1  -38.80   33.60
 -10  18   1  -23.70   28.60
  18  10   1  -49.30   37.10
 -18 -10   1   59.69   43.00
 -18 -10   1  -13.80   38.90
  10 -18   1   11.90   42.80
 -10  18   1  -56.79   33.20
  10 -18   1  -32.90   37.80
  10 -18  -1  -23.80   42.10
  18  10  -1  -87.39   35.10
 -18 -10  -1  -60.89   33.00
 -10  18  -1  -28.00   36.10
 -18 -10  -1  -33.80   34.00
 -10  18  -1  -53.49   25.20
  10 -18  -1  -26.10   38.20
  18  10  -1  -18.50   33.00
  18  11   1  -77.89   35.70
 -18 -11   1  -28.10   39.50
  18  11   1  -18.90   35.60
 -18 -11   1    7.50   42.60
  11 -18   1  -79.79   35.20
 -11  18   1   25.80   34.00
  11 -18   1  -48.90   41.40
  18  11  -1    0.40   43.20
  11 -18  -1  110.39   66.79
 -18 -11  -1  -37.00   38.30
  11 -18  -1  -31.50   41.70
 -18 -11  -1   -1.70   37.00
 -11  18  -1  -22.30   29.40
  18  11  -1    3.90   34.20
  18  12   1  -21.80   38.50
  12 -18   1 -105.69   42.70
  12 -18   1  -95.99   40.10
 -12  18   1  -16.60   35.00
  18  12  -1   65.79   41.20
  12 -18  -1  -96.29   40.00
  12 -18  -1  -15.10   41.60
 -18 -12  -1  -97.79   57.79
 -18 -12  -1  -21.20   49.20
  13 -18   1   -4.00   61.49
 -18 -13  -1  -54.19   44.10
  18  13  -1 -105.79   55.19
 -13  18  -1  -33.70   33.70
 -18 -13  -1 -102.89   39.40
 -13  18  -1  -70.79   38.00
  13 -18  -1  -19.50   49.50
  14 -18  -1  -51.19   60.09
  14 -18  -1  -24.20   48.90
 -18 -14  -1  -39.20   55.19
 -13 -19  -1   -7.30   45.80
 -13 -19  -1 -116.59   64.89
  12  19  -1  -96.69   56.59
 -12 -19  -1  -37.70   41.90
  12  19  -1   78.89   45.70
 -12 -19  -1  -54.79   49.40
 -19  12  -1  -13.60   35.30
  19 -12  -1   50.99   53.19
  19 -12  -1  -49.80   34.90
 -19  12  -1  -47.90   39.40
  19 -11   1  -56.09   33.20
 -11 -19   1  -70.29   42.30
  19 -11  -1  -26.10   52.29
 -19  11  -1  -65.69   32.50
  11  19  -1  -27.70   45.10
 -19  11  -1  -41.90   27.40
  11  19  -1  -10.50   35.70
 -10 -19   1  -80.19   35.30
  19 -10   1  -17.80   37.00
 -19  10   1  -29.00   26.50
 -10 -19   1 -112.89   38.60
  19 -10   1   26.30   46.50
  10  19   1    5.70   36.60
 -10 -19  -1    5.70   62.79
 -10 -19  -1   69.59   47.10
  19 -10  -1  -24.20   46.40
  19 -10  -1  -33.80   45.50
  10  19  -1   -1.60   40.60
  10  19  -1   21.90   38.10
 -19  10  -1  -54.09   29.50
 -19  10  -1  -19.70   31.70
 -19   9   1  -60.79   26.20
  19  -9   1  -69.49   43.90
  -9 -19   1  -49.00   36.40
  -9 -19   1  -58.79   38.80
  19  -9   1  -69.89   36.70
   9  19  -1  -23.20   33.20
 -19   9  -1   11.90   31.40
  19  -9  -1   38.40   34.80
  19  -9  -1  -26.30   41.00
   9  19  -1  -72.89   63.29
  -9 -19  -1  -35.40   40.40
  -9 -19  -1  -10.90   38.80
   8  19   1  -63.79   34.50
 -19   8   1  -28.00   25.00
  -8 -19   1   -7.70   37.10
  19  -8   1  -35.30   42.90
 -19   8   1  -24.90   27.40
   8  19   1  -16.90   33.10
  -8 -19   1  -13.60   40.50
  19  -8   1  -23.00   36.20
  19  -8  -1  -98.49   37.50
   8  19  -1  -10.20   29.10
 -19   8  -1  -28.60   29.40
  -8 -19  -1   20.50   42.00
   8  19  -1    4.50   35.10
  -8 -19  -1  -57.19   36.20
 -19   8  -1  -16.60   26.70
  19  -8  -1   -1.60   41.30
 -19   7   1  -29.30   24.30
  -7 -19   1   50.69   46.80
  19  -7   1   -9.90   41.60
   7  19   1    3.00   31.60
  19  -7   1  -63.89   40.20
 -19   7   1   14.40   26.50
   7  19   1  -47.10   36.20
  -7 -19   1  -50.29   34.20
  19  -7  -1    1.20   36.60
  19  -7  -1    4.80   39.10
   7  19  -1   20.90   34.10
   7  19  -1  -11.50   28.10
 -19   7  -1  -18.60   24.70
  -7 -19  -1    1.50   35.30
  -7 -19  -1  -91.59   32.10
 -19   7  -1  -26.30   28.00
   6  19   1  -52.69   34.00
  -6 -19   1    5.30   43.40
   6  19   1   16.10   52.89
 -19   6   1   -0.90   35.50
 -19   6   1  -13.00   26.90
  -6 -19   1  -15.80   38.30
  19  -6   1    5.50   42.40
  -6 -19  -1  -65.99   30.10
  19  -6  -1    2.80   41.40
 -19   6  -1    0.00   29.70
   6  19  -1  -30.50   34.60
 -19   6  -1  -29.00   20.70
   6  19  -1  -21.90   28.60
  -6 -19  -1  -35.70   37.60
  19  -6  -1   31.00   37.90
 -19   5   1  -15.70   46.80
   5  19   1   -4.70   40.20
  19  -5   1   35.90   38.20
  -5 -19   1  -14.80   38.00
   5  19   1  -42.10   35.10
  -5 -19   1   18.70   32.80
  19  -5   1   28.50   41.10
 -19   5   1    7.20   41.80
   5  19  -1   88.99   40.80
  -5 -19  -1  -17.10   34.20
 -19   5  -1    8.40   30.50
  19  -5  -1   74.09   38.30
   5  19  -1  -30.80   33.60
  19  -5  -1  -18.20   35.70
  -5 -19  -1   -4.10   34.10
 -19   5  -1  -10.50   24.40
  -4 -19   1  -28.00   33.50
 -19   4   1  -31.00   27.30
  19  -4   1  -27.90   37.60
   4  19   1  -78.29   31.70
  19  -4   1   21.20   32.60
   4  19   1  -17.60   29.80
  -4 -19   1  -86.59   30.20
 -19   4   1   25.40   33.30
   4  19  -1  -58.69   24.90
  19  -4  -1  -30.90   34.70
  -4 -19  -1  -52.29   32.40
 -19   4  -1    1.10   27.10
  -4 -19  -1  -26.80   34.10
   4  19  -1  -21.10   35.90
 -19   4  -1   34.80   32.60
  19  -4  -1  -79.79   28.50
  -3 -19   1  -15.70   35.20
 -19   3   1  -10.60   24.40
  19  -3   1   91.09   42.10
 -19   3   1   -0.50   40.70
  19  -3   1    5.40   35.90
   3  19   1  -38.90   24.50
  -3 -19  -1  -22.00   33.60
   3  19  -1  -39.30   29.50
   3  19  -1    2.60   30.00
  19  -3  -1  -14.20   35.50
  19  -3  -1  -84.29   30.10
 -19   3  -1   -3.60   20.90
 -19   3  -1    5.90   31.40
  -2 -19   1  -66.49   30.80
 -19   2   1   11.10   22.30
   2  19   1   27.60   30.30
 -19   2   1  -11.70   25.50
  19  -2   1  -61.29   29.60
  19  -2   1  -47.30   28.50
 -19   2  -1  -25.70   21.80
  19  -2  -1   13.20   33.20
   2  19  -1   16.30   35.70
 -19   2  -1  -16.70   33.40
   2  19  -1  -18.80   28.40
  -2 -19  -1   25.20   36.70
 -19   1   1  -18.30   23.80
  -1 -19   1   -6.90   35.20
   1  19   1   46.50   32.90
  19  -1   1  -52.29   31.10
  19  -1   1   13.60   35.60
 -19   1   1  -34.10   19.50
  -1 -19  -1   -5.40   36.80
   1  19  -1   18.50   30.30
  19  -1  -1  -26.10   33.10
 -19   1  -1  -54.79   27.10
   1  19  -1  -54.59   30.60
 -19   1  -1  -45.30   28.40
  19  -1  -1  -36.80   30.80
   0  19   1  -30.30   49.80
 -19   0   1   -3.40   26.00
   0 -19   1  -36.90   31.90
 -19   0   1  -22.90   31.00
  19   0   1  -79.59   29.50
   0  19   1    4.20   29.60
   0 -19   1  -78.09   31.50
  19   0   1   50.89   39.10
   0  19  -1  -59.39   32.50
   0 -19  -1   17.50   34.20
  19   0  -1    2.70   34.30
   0 -19  -1  -32.70   32.20
   0  19  -1    6.30   29.20
 -19   0  -1  -20.60   30.70
 -19   0  -1  -17.90   29.60
  19   1   1   -2.20   37.20
  19   1   1   -8.10   36.00
  -1  19   1  -21.30   53.09
 -19  -1   1   19.40   28.00
   1 -19   1   22.70   39.90
  -1  19   1  -14.70   27.00
 -19  -1   1  -23.70   32.00
   1 -19   1  -22.40   34.30
 -19  -1  -1   -7.50   31.30
  -1  19  -1   17.60   29.20
  -1  19  -1  -42.60   30.80
  19   1  -1   24.30   36.30
   1 -19  -1  -44.10   31.20
   1 -19  -1    2.00   35.80
 -19  -1  -1   18.10   32.40
  19   1  -1  -34.30   30.10
 -19  -2   1  -35.70   29.40
  -2  19   1   -7.40   26.80
  19   2   1   10.00   38.00
 -19  -2   1  -37.60   26.40
  19   2   1  -14.90   32.60
   2 -19   1  -62.39   29.90
   2 -19   1   33.40   37.40
   2 -19  -1  -12.80   34.20
  -2  19  -1    5.30   29.10
  19   2  -1   97.29   40.30
  -2  19  -1  -46.90   32.40
 -19  -2  -1  -22.00   33.50
 -19  -2  -1  -67.09   28.00
   2 -19  -1   -0.30   34.40
  19   2  -1  -19.60   31.50
  19   3   1   16.60   37.00
  -3  19   1  -56.39   48.90
 -19  -3   1  -87.59   39.80
  19   3   1  -43.10   33.10
   3 -19   1  -18.90   37.90
  -3  19   1   40.80   29.80
   3 -19   1  -39.40   33.20
 -19  -3   1  -43.00   30.60
  -3  19  -1  -88.19   29.70
 -19  -3  -1  -26.10   29.30
  -3  19  -1   23.70   32.80
   3 -19  -1    8.50   37.40
   3 -19  -1  -49.10   31.80
 -19  -3  -1  -22.80   31.70
  19   3  -1  -32.10   31.20
  19   3  -1  -28.90   33.80
  19   4   1   55.59   38.20
   4 -19   1  -62.19   30.60
 -19  -4   1    7.90   30.00
  -4  19   1   26.60   31.60
  -4  19   1  -52.39   34.40
 -19  -4   1    5.10   41.00
   4 -19   1  -31.00   35.10
 -19  -4  -1   -6.60   35.90
  -4  19  -1   25.40   27.30
 -19  -4  -1   -9.30   30.10
   4 -19  -1   53.99   38.40
  19   4  -1  -49.50   27.60
   4 -19  -1   14.80   36.70
  -4  19  -1  -32.40   35.00
  19   4  -1  -44.00   34.50
   5 -19   1    1.80   38.90
  -5  19   1    3.80   26.80
 -19  -5   1   49.00   30.20
  -5  19   1  -34.50   34.20
  19   5   1   91.99   41.00
   5 -19   1  -48.00   35.20
  -5  19  -1  -51.49   37.80
   5 -19  -1   42.90   39.40
  19   5  -1   55.09   36.50
 -19  -5  -1   30.70   31.20
 -19  -5  -1   27.00   39.00
   5 -19  -1   42.70   38.70
  -5  19  -1   41.40   33.20
  19   5  -1   42.80   38.50
 -19  -6   1  -14.70   28.90
   6 -19   1   -8.30   39.20
 -19  -6   1    9.60   34.60
  19   6   1    5.10   31.90
  -6  19   1    2.30   32.00
   6 -19   1  -49.80   29.90
  19   6   1  -39.20   36.60
 -19  -6  -1   -6.10   33.70
  19   6  -1  -32.20   32.30
   6 -19  -1  -25.60   33.70
  -6  19  -1  -63.79   33.20
  -6  19  -1  -19.00   25.30
  19   6  -1   21.00   34.30
 -19  -6  -1   -2.90   33.60
   6 -19  -1  -63.29   32.50
  19   7   1   57.89   40.00
 -19  -7   1    8.30   29.70
   7 -19   1  -19.10   37.20
  19   7   1   -9.20   35.80
  -7  19   1  -18.30   32.60
 -19  -7   1  -15.10   36.20
  -7  19   1   -4.80   39.80
  19   7  -1  -28.80   36.60
 -19  -7  -1   18.50   37.00
  19   7  -1    5.00   36.40
  -7  19  -1  -41.10   23.40
 -19  -7  -1  -38.10   36.00
   7 -19  -1   23.90   37.30
   7 -19  -1    6.20   39.20
  -7  19  -1  -86.89   34.20
  -8  19   1  -50.79   35.20
  19   8   1    1.60   38.20
  -8  19   1  -24.30   29.30
 -19  -8   1  -89.79   33.70
 -19  -8   1    1.60   41.10
  19   8   1   33.40   41.20
   8 -19   1   86.89   46.80
   8 -19   1  -32.10   40.00
  19   8  -1  -32.50   34.50
  19   8  -1  -59.89   33.20
  -8  19  -1  -25.20   27.10
   8 -19  -1   34.30   42.10
 -19  -8  -1  -40.70   33.70
   8 -19  -1   -8.60   38.80
 -19  -8  -1  -57.39   32.90
  -8  19  -1  -84.59   32.20
 -19  -9   1   -5.90   39.70
  19   9   1   22.50   39.30
   9 -19   1    3.70   38.10
  -9  19   1   -9.80   30.60
 -19  -9   1  -43.70   38.90
  19   9   1   45.30   41.60
   9 -19   1   49.90   48.80
   9 -19  -1  -83.19   49.40
  -9  19  -1 -129.49   43.70
   9 -19  -1  -16.80   40.90
  19   9  -1   28.90   33.50
  19   9  -1  -20.40   42.00
  -9  19  -1  -55.29   27.90
 -19  -9  -1  -53.89   38.10
  10 -19   1  -72.19   40.10
 -19 -10   1  -69.89   41.00
 -19 -10   1   48.60   69.79
 -10  19   1   -1.50   31.50
  10 -19   1  -43.30   41.90
  19  10   1  -54.99   35.90
  19  10  -1  -16.30   35.10
  10 -19  -1  -86.59   37.80
 -19 -10  -1  -68.49   41.60
 -10  19  -1    4.60   32.90
 -10  19  -1  -87.59   36.00
  10 -19  -1  -95.29   35.90
 -19 -10  -1   17.40   41.10
  11 -19   1   10.70   47.70
 -19 -11   1   11.40   56.89
  11 -19   1  -69.09   72.79
 -19 -11  -1  -38.00   46.80
 -11  19  -1  -82.29   28.10
 -11  19  -1  -82.49   37.20
 -19 -11  -1   -8.80   61.39
  11 -19  -1   -7.20   47.70
  19  11  -1  -30.50   45.50
  11 -19  -1  -27.50   44.60
  12 -19  -1  -60.09   41.80
  12 -19  -1   -9.20   57.99
 -19 -12  -1  -87.29   39.90
  19  12  -1  -64.69   42.20
 -19 -12  -1   16.30   50.29
  19  12  -1 -105.19   38.40
 -12  19  -1  -79.09   37.50
  19  13  -1 -205.48   76.19
 -19 -13  -1    1.70   53.79
  20 -11  -1  -80.89   34.80
 -11 -20  -1  -71.09   50.59
 -11 -20  -1   -5.90   50.89
  20 -11  -1  -93.79   55.09
  20 -10  -1  -98.29   46.70
 -10 -20  -1  -44.70   43.60
 -20  10  -1    5.60   31.90
  10  20  -1  -58.79   38.10
  20 -10  -1   -8.00   29.70
  10  20  -1  -24.20   42.70
 -10 -20  -1    2.40   48.40
 -20  10  -1  -61.49   35.30
  20  -9   1  -35.00   46.30
  20  -9  -1  101.59   68.59
 -20   9  -1  -37.40   34.30
  -9 -20  -1 -105.09   39.20
  -9 -20  -1   38.60   54.59
  20  -9  -1   13.30   49.20
 -20   9  -1  -24.90   26.90
   9  20  -1   -6.50   36.20
   8  20   1   19.20   39.40
  -8 -20   1  -17.50   40.00
 -20   8   1  -34.40   28.80
  20  -8   1  -75.69   39.20
  -8 -20   1  -66.39   40.60
 -20   8  -1  -30.70   35.80
  -8 -20  -1  -96.99   39.70
  20  -8  -1  -83.99   55.59
  -8 -20  -1    2.80   44.20
   8  20  -1   14.40   37.10
 -20   8  -1  -65.09   23.40
  20  -8  -1   -3.00   44.10
   8  20  -1  -17.50   39.60
  20  -7   1  -84.79   32.10
  -7 -20   1  -73.59   37.60
 -20   7   1    6.00   27.10
  20  -7   1  -86.39   38.60
  -7 -20   1   -3.30   36.00
   7  20   1  -18.90   36.50
  -7 -20  -1  -40.20   47.80
   7  20  -1    8.90   50.09
  20  -7  -1  -30.80   41.60
 -20   7  -1  -76.19   26.20
   7  20  -1  -72.29   31.10
  -7 -20  -1   50.19   44.80
  20  -7  -1  -14.50   41.10
  -6 -20   1   50.89   45.60
  -6 -20   1  -38.00   36.60
   6  20   1   16.10   41.20
  20  -6   1   63.19   45.20
   6  20   1  -33.50   33.10
 -20   6   1   28.40   29.30
 -20   6   1   33.80   33.10
  20  -6   1  -94.59   37.20
  20  -6  -1  -18.80   36.50
 -20   6  -1   -5.80   27.90
  -6 -20  -1   13.00   42.10
   6  20  -1  -11.60   37.30
   6  20  -1  -55.19   28.50
  20  -6  -1  -91.49   40.90
  -6 -20  -1  -59.39   34.60
 -20   6  -1   10.20   32.60
  20  -5   1  -35.00   38.00
   5  20   1  -36.70   30.70
  20  -5   1   42.30   43.40
 -20   5   1    3.30   30.60
  -5 -20   1   67.09   40.90
 -20   5   1   19.40   29.30
   5  20   1   46.10   42.20
  -5 -20  -1  -80.19   34.40
   5  20  -1  -42.50   37.10
   5  20  -1    6.30   31.00
 -20   5  -1  -43.70   29.50
  -5 -20  -1   14.30   42.40
 -20   5  -1  -38.20   24.70
  20  -5  -1  -63.09   36.90
  20  -5  -1  -47.60   39.00
   4  20   1  -28.00   35.90
  20  -4   1   28.40   43.10
  -4 -20   1   29.50   36.10
 -20   4   1    7.30   30.80
   4  20   1  -27.50   30.20
 -20   4   1  -35.90   27.80
  20  -4   1  -27.40   37.60
  -4 -20  -1  -30.20   34.20
   4  20  -1  -15.80   28.30
  20  -4  -1  -69.59   33.30
 -20   4  -1  -26.80   22.20
   4  20  -1    9.00   38.90
  -4 -20  -1  -21.40   36.00
   3  20   1   -4.00   31.30
 -20   3   1   -5.40   24.70
  20  -3   1  -16.10   39.40
 -20   3   1  -44.90   24.30
   3  20   1   43.30   39.20
  20  -3   1   -9.70   34.90
  20  -3  -1  -40.80   35.20
 -20   3  -1   -7.50   31.40
   3  20  -1  -14.50   38.60
  20  -3  -1  -15.80   32.20
   3  20  -1  -28.70   23.70
  -3 -20  -1  -42.70   35.20
 -20   3  -1   12.10   21.50
  20  -2   1   -4.00   38.60
 -20   2   1  -16.30   27.90
   2  20   1   12.40   43.70
  20  -2   1   43.90   41.10
 -20   2   1   -4.20   26.40
  -2 -20   1   44.00   61.69
   2  20   1  -14.40   31.90
  20  -2  -1  -75.09   33.40
 -20   2  -1    8.40   25.20
  20  -2  -1   16.60   36.90
 -20   2  -1   21.80   32.20
   2  20  -1  -41.00   22.40
  -2 -20  -1   -4.30   40.90
   2  20  -1  -34.30   36.40
 -20   1   1  -36.50   21.10
  -1 -20   1    4.90   38.80
 -20   1   1   -2.40   28.70
   1  20   1   11.30   52.99
  20  -1   1   15.00   38.60
  20  -1   1  -57.49   33.90
   1  20   1   17.70   35.60
  -1 -20   1   10.70   40.30
  20  -1  -1  -72.09   33.20
   1  20  -1   67.59   32.90
  20  -1  -1   -4.60   31.70
  -1 -20  -1   21.50   36.20
 -20   1  -1   -6.50   27.80
  -1 -20  -1  -22.90   35.30
   1  20  -1  -58.99   35.00
 -20   1  -1  -41.10   33.70
  20   0   1    1.30   43.50
  20   0   1   82.09   42.60
   0 -20   1  -27.40   42.40
   0  20   1  -42.90   30.30
 -20   0   1    8.60   26.10
   0 -20   1   92.59   45.10
 -20   0   1  -54.69   32.20
   0  20  -1  -60.49   34.60
   0 -20  -1  -11.00   33.60
  20   0  -1    7.00   33.80
   0  20  -1   -9.10   29.80
  20   0  -1   18.30   36.70
   0 -20  -1  -37.50   34.60
 -20   0  -1  -28.80   27.20
 -20   0  -1   47.20   35.80
  -1  20   1   -0.10   34.90
   1 -20   1   58.99   44.10
 -20  -1   1  -49.40   31.10
 -20  -1   1  -12.50   26.70
  20   1   1   43.20   41.70
   1 -20   1   69.19   45.40
  20   1   1  -47.10   34.70
  20   1  -1   21.10   36.80
   1 -20  -1   -0.40   35.60
  -1  20  -1  -46.10   36.00
   1 -20  -1  -47.20   36.40
  20   1  -1  -23.10   34.20
 -20  -1  -1   -3.00   33.90
 -20  -1  -1    3.30   30.60
  -1  20  -1   20.20   32.40
 -20  -2   1    4.60   26.10
 -20  -2   1  -23.70   30.90
   2 -20   1   28.10   43.80
  20   2   1   41.20   43.70
   2 -20   1   48.60   60.29
  -2  20   1   15.50   45.70
  20   2   1  -27.70   38.00
  -2  20   1   -8.50   34.20
  -2  20  -1  -36.60   23.30
   2 -20  -1  -22.90   35.40
  -2  20  -1  -38.20   38.00
 -20  -2  -1  -56.19   26.20
   2 -20  -1  -70.29   29.00
  20   2  -1  -53.19   33.20
 -20  -2  -1  -39.10   31.80
  20   2  -1  -75.89   30.20
  -3  20   1  -31.80   35.10
  -3  20   1   31.60   42.70
  20   3   1  -24.50   37.40
   3 -20   1  -22.60   38.60
 -20  -3   1  -36.60   28.10
  20   3   1   -7.60   38.80
 -20  -3   1   -1.90   35.40
  20   3  -1    2.40   36.70
   3 -20  -1   10.80   38.20
   3 -20  -1  -71.99   33.70
 -20  -3  -1  -51.69   28.70
 -20  -3  -1  -42.80   34.00
  -3  20  -1    4.80   28.30
  20   4   1  -60.29   35.00
  -4  20   1  -38.90   35.80
  -4  20   1    4.60   33.10
   4 -20   1  -44.20   47.60
  20   4   1  -21.90   35.90
 -20  -4   1   -5.60   30.30
   4 -20   1    9.40   41.20
 -20  -4   1    6.10   38.30
  20   4  -1  -18.20   35.80
  -4  20  -1  -58.39   24.40
  -4  20  -1  -61.49   36.50
 -20  -4  -1  -46.30   30.00
   4 -20  -1   44.30   37.60
   4 -20  -1   -7.30   36.90
 -20  -4  -1  -66.69   33.30
  20   5   1  -78.19   31.30
  20   5   1   26.60   37.10
  -5  20   1  -25.80   38.00
  -5  20   1  -16.90   30.30
 -20  -5   1   61.29   46.60
 -20  -5   1    1.90   31.30
   5 -20   1  -10.20   38.10
   5 -20   1  -25.10   38.30
  20   5  -1  -70.69   31.80
   5 -20  -1    5.30   41.60
 -20  -5  -1  -52.09   34.60
  20   5  -1   15.50   37.60
  -5  20  -1  103.49   37.90
 -20  -5  -1  -19.10   37.50
   5 -20  -1  -39.10   35.50
  -5  20  -1  -68.89   32.90
  -6  20   1   -1.60   29.00
  20   6   1    2.80   38.80
   6 -20   1  -42.90   36.30
   6 -20   1   10.40   43.00
  20   6   1   88.29   44.50
 -20  -6   1  -20.90   30.00
 -20  -6   1  -56.69   34.60
  20   6  -1  -52.29   34.90
  -6  20  -1  -19.00   26.10
   6 -20  -1  -66.49   38.40
   6 -20  -1  -34.00   40.50
 -20  -6  -1  -52.79   38.00
  20   6  -1  -42.00   37.20
 -20  -6  -1    5.50   35.70
  20   7   1  -65.19   39.20
   7 -20   1   10.40   42.10
  20   7   1   13.90   42.50
   7 -20   1  -73.99   34.20
  -7  20   1  -21.10   33.10
 -20  -7   1  -82.89   41.20
 -20  -7   1   -4.40   36.00
  -7  20  -1   33.10   43.70
  20   7  -1   55.89   36.90
  20   7  -1  -10.20   40.40
 -20  -7  -1   34.20   36.80
  -7  20  -1  -70.89   29.50
   7 -20  -1  -26.50   39.50
 -20  -7  -1  -29.10   39.60
   8 -20   1  -97.29   37.00
  20   8   1    1.60   42.20
   8 -20   1  -62.49   41.70
  -8  20   1   -8.70   32.80
 -20  -8  -1   65.59   40.50
  -8  20  -1   27.20   33.90
  20   8  -1   16.50   39.40
  -8  20  -1  -10.90   38.70
   8 -20  -1  -39.90   37.80
   8 -20  -1   31.20   40.70
   9 -20   1  -92.29   66.89
 -20  -9   1   29.30   55.09
  20   9   1   25.60   56.99
   9 -20   1 -118.39   40.40
  -9  20  -1  -43.90   37.40
  -9  20  -1  -47.90   32.70
  20   9  -1   24.90   39.80
  20   9  -1   49.70   50.59
   9 -20  -1  -75.49   42.20
 -20  -9  -1  -15.10   40.90
 -20  -9  -1 -146.19   63.59
 -20 -10  -1    3.20   46.30
  20  10  -1  -62.29   41.70
 -10  20  -1   10.70   36.10
 -20 -10  -1  -93.19   41.70
  20  10  -1   46.30   45.00
 -20 -11  -1  -47.70   56.49
  11 -20  -1  -75.19   47.10
  11 -20  -1   60.29   74.69
  20  11  -1  -74.69   49.80
  21  -9  -1  -26.20   58.49
  -9 -21  -1 -115.29   41.40
  -9 -21  -1  -11.20   57.29
  21  -9  -1 -130.89   46.90
   8  21  -1  -76.09   39.90
  -8 -21  -1   -1.00   48.10
 -21   8  -1  -52.39   26.20
   8  21  -1  -16.40   44.00
 -21   8  -1  -76.49   41.60
  -8 -21  -1  -72.79   39.50
  21  -8  -1 -112.59   47.20
  21  -8  -1   20.20   47.10
  -7 -21   1 -105.09   54.19
  21  -7  -1 -113.79   43.20
   7  21  -1   38.10   42.40
 -21   7  -1  -10.40   37.30
  21  -7  -1    3.90   45.90
 -21   7  -1  -21.30   31.70
   7  21  -1  -10.60   41.40
  -7 -21  -1  -31.70   42.80
  21  -6   1  -84.39   40.40
  -6 -21   1  -80.19   37.30
  -6 -21   1   -7.00   65.49
   6  21  -1  -75.09   32.40
   6  21  -1  -94.79   37.50
  -6 -21  -1  -49.60   39.50
 -21   6  -1  -57.19   31.90
  -6 -21  -1  -46.60   40.20
 -21   6  -1  -23.60   26.50
  21  -6  -1   21.80   50.89
  21  -6  -1  -53.09   43.50
  21  -5   1  -69.49   40.60
   5  21   1  -27.10   36.20
  -5 -21   1  -78.79   38.20
 -21   5   1   -3.50   35.90
  21  -5   1 -102.89   40.00
   5  21  -1  -25.70   33.90
  -5 -21  -1  -45.70   33.00
  -5 -21  -1   -3.20   43.40
 -21   5  -1 -100.99   33.80
  21  -5  -1  -41.00   41.50
 -21   5  -1  -45.00   27.40
   5  21  -1  -38.40   38.30
   4  21   1  -34.30   33.90
  -4 -21   1  -13.90   40.00
  21  -4   1  -33.50   37.60
 -21   4   1  -29.20   27.00
  21  -4   1   15.70   44.80
  21  -4  -1  -17.10   40.90
  21  -4  -1    0.80   44.40
 -21   4  -1  -41.50   26.50
   4  21  -1  -29.90   35.00
  -4 -21  -1   41.90   43.40
   4  21  -1  -52.69   42.10
 -21   4  -1    3.00   34.70
  -3 -21   1   33.70   37.50
  21  -3   1    3.60   40.00
  21  -3   1   -7.50   42.40
   3  21   1   32.20   37.10
 -21   3   1  -11.90   28.00
  -3 -21  -1   25.90   44.50
   3  21  -1   -5.50   45.30
  21  -3  -1   59.29   39.30
 -21   3  -1   51.89   36.40
  21  -3  -1    4.50   37.90
   3  21  -1  -85.39   28.30
  21  -2   1  -36.70   36.80
   2  21   1   13.20   33.90
  -2 -21   1   27.60   39.10
  21  -2   1   13.00   44.00
 -21   2   1   14.60   28.40
 -21   2   1   66.59   32.00
  -2 -21   1   62.49   47.90
  -2 -21  -1   74.29   46.00
  21  -2  -1   81.69   43.10
   2  21  -1   23.30   37.10
 -21   2  -1  -11.00   29.20
  21  -2  -1  -61.59   35.40
   2  21  -1  -71.09   44.80
 -21   2  -1  -27.40   42.10
   1  21   1   -6.50   32.60
 -21   1   1   40.90   33.20
  -1 -21   1   34.30   42.40
 -21   1   1  -22.80   26.00
  -1 -21   1  -21.80   36.20
  21  -1   1  -54.99   37.20
  21  -1   1   16.20   42.00
  21  -1  -1  -41.80   37.60
   1  21  -1  -34.80   45.20
   1  21  -1   25.70   34.40
 -21   1  -1    2.80   30.90
  21  -1  -1   59.99   44.30
  -1 -21  -1    6.20   46.20
 -21   0   1   -8.40   28.80
 -21   0   1  -61.59   33.80
  21   0   1   23.00   42.70
   0 -21   1   80.39   48.10
  21   0   1  -48.50   35.40
   0  21   1   41.50   36.90
   0  21  -1   -1.30   31.30
 -21   0  -1   77.59   34.90
 -21   0  -1  -54.89   37.30
   0 -21  -1   11.80   44.90
  21   0  -1  -33.90   34.50
   0 -21  -1  -31.20   38.20
  21   0  -1    0.60   41.10
   1 -21   1   48.70   47.80
  -1  21   1  -15.00   31.90
  21   1   1   98.89   49.00
 -21  -1   1  -62.19   35.40
   1 -21   1  -97.79   33.90
  21   1   1  -33.80   40.40
 -21  -1   1   68.49   34.80
 -21  -1  -1   17.50   32.70
   1 -21  -1   17.70   39.00
  -1  21  -1 -139.59   65.29
  -1  21  -1  -46.30   31.70
  21   1  -1  -19.10   41.50
   1 -21  -1   -5.50   45.20
 -21  -1  -1   -0.80   41.40
  21   1  -1   31.60   39.00
 -21  -2   1    1.50   39.30
  21   2   1    2.60   41.50
  -2  21   1    4.50   34.50
   2 -21   1  -14.40   44.00
 -21  -2   1   11.10   32.60
  -2  21  -1 -112.29   38.20
   2 -21  -1  -17.60   55.89
   2 -21  -1   54.99   47.10
 -21  -2  -1  -24.50   37.10
  21   2  -1   11.60   41.40
 -21  -2  -1   40.00   34.10
  -2  21  -1   50.39   35.60
  21   2  -1   -8.00   37.70
 -21  -3   1  -21.30   33.30
   3 -21   1  -34.60   35.80
 -21  -3   1    1.70   42.80
  21   3   1   56.29   45.10
  21   3   1  -91.99   41.50
  -3  21   1   -6.50   32.50
   3 -21   1   27.30   46.20
 -21  -3  -1   56.49   33.00
  21   3  -1    2.80   38.30
 -21  -3  -1  -59.39   37.40
  -3  21  -1  -68.49   30.10
   3 -21  -1   41.80   45.40
  21   3  -1  -54.29   38.60
   4 -21   1    9.50   44.10
  21   4   1  -91.59   46.80
   4 -21   1  -74.89   38.70
 -21  -4   1   27.80   35.30
  21   4   1   85.19   43.80
  -4  21   1   11.30   33.50
  21   4  -1   51.29   40.70
  -4  21  -1  -37.40   38.40
 -21  -4  -1   59.59   40.70
   4 -21  -1  -15.80   40.00
  -4  21  -1  -30.30   31.50
   4 -21  -1  181.38   60.29
 -21  -4  -1  -71.19   60.69
  21   5   1   88.49   47.60
   5 -21   1  -62.99   38.40
 -21  -5   1   64.79   44.40
  -5  21   1   -8.20   36.90
   5 -21   1  -94.89   39.00
  -5  21  -1  -15.70   43.50
  -5  21  -1   37.30   34.10
   5 -21  -1  -64.89   38.00
   5 -21  -1  -60.49   36.20
  21   5  -1   62.89   40.40
 -21  -5  -1  -10.60   69.89
 -21  -5  -1  -18.50   38.20
 -21  -6   1  -15.40   37.60
   6 -21   1   55.59   43.50
  21   6   1   24.30   52.69
  21   6  -1    6.60   58.39
  -6  21  -1  -36.80   30.90
  21   6  -1   -3.30   41.80
   6 -21  -1   -5.40   43.80
 -21  -6  -1   31.80   46.40
  -6  21  -1  -81.69   35.20
 -21  -6  -1   15.50   43.00
   6 -21  -1 -110.79   39.60
   7 -21   1   -5.20   48.00
   7 -21  -1  -19.90   47.50
 -21  -7  -1  -74.29   54.99
 -21  -7  -1  -79.49   38.40
  21   7  -1    5.60   39.30
  21   7  -1  -76.69   51.59
  -7  21  -1  -87.89   36.70
   7 -21  -1   67.69   56.89
  -7  21  -1  -50.19   30.40
   8 -21  -1  -35.60   69.49
  21   8  -1  -76.49   40.80
  -8  21  -1  -34.20   39.10
 -21  -8  -1  -69.09   42.60
   8 -21  -1  -77.59   38.90
 -21  -8  -1  -55.09   41.90
  21   8  -1  -27.50   41.00
  21   9  -1 -113.79   51.99
 -21  -9  -1 -161.18   54.89
 -21  -9  -1 -140.69   48.90
  21   9  -1   17.80   53.29
   9 -21  -1  -41.40   69.99
  -7 -22  -1  -81.99   61.49
  -6 -22  -1   -8.90   59.59
  22  -6  -1  -81.79   46.40
  -6 -22  -1 -114.59   40.20
  22  -6  -1   21.10   56.59
  -5 -22  -1  -31.70   49.40
  22  -5  -1  -91.19   42.20
 -22   5  -1   -4.10   32.90
   5  22  -1  -97.79   44.30
  22  -5  -1  -63.99   55.89
   4  22  -1  -27.40   45.80
  22  -4  -1  -64.59   49.40
   4  22  -1   43.40   39.00
 -22   4  -1   10.30   47.20
  -4 -22  -1   -1.90   55.89
  22  -4  -1  -54.99   45.50
 -22   4  -1    9.30   33.40
  22  -3  -1  -77.59   42.00
  22  -3  -1  -79.59   39.60
   3  22  -1  -40.20   36.90
 -22   3  -1    9.50   41.90
 -22   3  -1    1.90   27.80
   3  22  -1   -1.50   41.70
  -2 -22   1  -20.10   43.70
  22  -2  -1   54.69   49.80
  -2 -22  -1  -82.49   48.10
   2  22  -1  -20.60   35.10
  -2 -22  -1   55.89   50.29
 -22   2  -1  -38.20   30.90
 -22   2  -1   -1.00   36.40
  22  -2  -1  -92.09   38.20
   2  22  -1   28.70   39.40
  -1 -22   1  -25.50   42.50
  22  -1   1 -100.79   43.10
   1  22  -1   -4.00   34.60
  -1 -22  -1  -32.00   50.49
   1  22  -1  -64.99   35.10
  22  -1  -1 -111.39   37.30
  -1 -22  -1  -42.30   42.30
  22  -1  -1    1.40   45.00
 -22   1  -1  -81.89   30.30
 -22   1  -1  -78.99   27.60
  22   0   1   18.90   55.49
   0 -22   1  -39.80   42.80
   0 -22   1  -47.90   77.19
   0 -22  -1  -25.00   56.49
   0  22  -1   29.60   40.00
  22   0  -1  -16.40   42.30
   0  22  -1  -54.19   31.80
  22   0  -1  -41.50   46.40
 -22   0  -1   -7.90   38.50
   0 -22  -1  -84.69   43.90
  22   1   1 -101.29   50.19
   1 -22   1  -23.60   43.30
  -1  22  -1  -76.19   30.10
  22   1  -1 -110.09   38.40
   1 -22  -1  -73.99   44.20
  22   1  -1  -45.00   49.70
  -1  22  -1  -16.40   37.90
   1 -22  -1   47.80   51.79
   2 -22   1 -106.49   41.10
   2 -22  -1    5.90   52.09
  -2  22  -1  -31.50   39.10
 -22  -2  -1  -47.90   42.50
   2 -22  -1  -72.19   43.90
  22   2  -1   52.29   49.30
  -2  22  -1  -34.50   33.00
  22   2  -1  -25.70   44.10
   3 -22   1  162.88   65.79
   3 -22  -1   83.39   77.19
   3 -22  -1   18.20   45.10
  -3  22  -1  -16.20   43.40
 -22  -3  -1 -114.79   39.10
  22   3  -1  -25.30   41.30
  22   3  -1  -29.50   40.60
  22   4  -1  -30.10   46.10
 -22  -4  -1  -44.80   43.50
 -22  -4  -1    9.20   52.89
  -4  22  -1   44.20   39.40
  22   4  -1  -38.40   40.10
   4 -22  -1  -45.60   56.59
   4 -22  -1  115.69   48.20
 -22  -5  -1  -24.40   44.10
   5 -22  -1  -30.50   39.60
 -22  -5  -1  -71.29   44.60
   5 -22  -1 -130.39   52.29
  22   5  -1  -34.80   42.80
   6 -22  -1  -87.89   62.69
  22   6  -1   -3.40   51.09
   6 -22  -1   58.29   51.49
 -22  -6  -1 -102.19   45.30
  22   6  -1 -133.39   48.90
 -22  -6  -1   18.20   55.49
  22   7  -1  -26.00   58.49
  23  -2  -1   -9.00   83.59
  -2 -23  -1 -109.49   55.39
  -1 -23  -1 -148.29   50.89
  23  -1  -1  -31.70   56.69
  23   0  -1  -62.89   50.49
  23   1  -1  -82.29   55.39
   1 -23  -1  -95.79   60.49
  23   2  -1  -90.99   66.59
   1   0   2 6312.87  203.98
   0   1   2 6651.33  203.38
   0  -1   2 7132.29  204.78
  -1   0   2 6195.28  203.48
   0  -1  -2 7290.17  204.48
   0  -1  -2 7300.27  204.48
  -1   0  -2 7326.37  205.18
   1   0  -2 7575.84  205.08
   1   0  -2 7214.38  204.78
  -1   0  -2 7656.53  205.58
   0   1  -2 7397.96  205.68
  -1  -1   2 1345.57   51.59
  -1  -1   2 1279.37   43.60
   1  -1   2 1257.47   43.60
  -1   1   2 1300.27   46.40
   1   1   2 1312.27   43.00
   1   1   2 1382.66   50.29
   1   1  -2 1318.07   44.40
  -1  -1  -2 1405.16   44.30
   1  -1  -2 1315.37   43.40
  -1   1  -2 1305.07   44.40
   1   1  -2 1371.46   44.50
   1  -1  -2 1308.77   43.40
  -1   1  -2 1392.56   44.70
  -1  -1  -2 1374.86   44.20
  -1  -2   2  850.21   35.50
   1   2   2  827.72   32.50
   2  -1   2  902.31   34.20
  -2   1   2  853.81   32.70
   1   2   2  818.12   33.70
  -2   1   2  826.62   34.00
  -1  -2   2  790.52   33.10
   2  -1   2  876.11   35.30
  -1  -2  -2  762.72   33.00
   2  -1  -2  755.82   32.50
   1   2  -2  739.53   33.10
   1   2  -2  761.22   33.90
  -2   1  -2  782.12   33.20
  -1  -2  -2  797.52   33.20
  -2   1  -2  854.81   34.10
   2  -1  -2  783.02   33.10
   2   0   2  355.36   19.70
   0   2   2  377.66   24.90
  -2   0   2  363.56   19.30
   0   2   2  353.16   18.40
   0  -2   2  374.56   19.80
   0   2  -2  339.57   19.90
   0  -2  -2  348.17   19.40
   0   2  -2  354.36   20.40
  -2   0  -2  368.16   20.10
   2   0  -2  364.66   20.20
   2   0  -2  378.96   19.80
  -2   0  -2  366.96   20.30
   0  -2  -2  353.36   19.60
   1  -2   2  911.71   35.70
   2   1   2  886.51   35.80
  -1   2   2  843.42   34.80
  -2  -1   2  873.81   36.70
  -1   2   2  855.41   34.00
   1  -2   2  955.90   37.50
   2   1   2  797.82   34.50
  -2  -1   2  846.22   34.70
  -2  -1  -2  925.31   35.80
  -2  -1  -2  890.41   35.70
   1  -2  -2  834.72   34.20
  -1   2  -2  833.72   34.90
   2   1  -2  908.01   36.00
  -1   2  -2  973.40   36.20
   2   1  -2  870.41   35.40
   1  -2  -2  880.31   34.70
   2  -2   2 8524.25  233.58
  -2  -2   2 7536.75  231.68
   2   2   2 7435.36  231.28
  -2   2   2 7484.85  230.58
   2   2   2 7549.24  231.28
  -2  -2   2 7779.42  232.18
   2  -2   2 8359.96  233.08
  -2   2   2 7267.17  230.28
  -2  -2  -2 7825.32  236.58
   2  -2  -2 7358.86  233.08
   2   2  -2 7605.74  238.78
  -2   2  -2 8490.95  240.28
  -2  -3   2  256.87   23.70
   3  -2   2  223.28   22.00
  -2  -3   2  181.88   21.70
   2   3   2  234.58   22.80
   3  -2   2  284.87   25.80
   2   3   2  226.18   22.10
  -3   2   2  219.58   22.60
  -3   2   2  212.18   22.80
  -2  -3  -2  177.18   21.70
   2   3  -2  210.28   24.20
  -3   2  -2  220.38   24.30
   3  -2  -2  213.18   23.60
   1   3   2 2559.34   84.09
  -3   1   2 2490.25   83.49
  -1  -3   2 2481.15   84.59
   3  -1   2 2556.84   84.79
   3  -1   2 2472.05   84.89
  -1  -3   2 2566.24   85.39
  -3   1   2 2426.76   83.49
   1   3   2 2492.05   83.69
   1   3  -2 2492.95   85.59
  -1  -3  -2 2423.36   83.99
   3  -1  -2 2348.36   83.89
  -3   1  -2 2612.84   85.29
   3   0   2 3803.02  118.79
  -3   0   2 3749.43  118.19
   3   0   2 3670.03  118.69
   0  -3   2 3679.03  118.79
   0   3   2 3690.13  117.49
   0   3   2 3570.54  116.89
  -3   0   2 3667.93  117.89
   0   3  -2 3848.21  122.69
   3   0  -2 3826.42  120.29
  -3   0  -2 3807.52  119.29
   0  -3  -2 3695.13  118.19
   1  -3   2 2154.08   73.09
  -1   3   2 1972.30   70.89
  -3  -1   2 2076.59   72.19
  -1   3   2 2019.90   71.29
   3   1   2 2082.09   72.79
   1  -3   2 2274.17   73.99
  -3  -1   2 2113.09   72.49
   3   1   2 2048.79   71.99
  -1   3  -2 2045.90   72.99
  -3  -1  -2 1972.10   72.39
   3   1  -2 1958.50   72.69
   3   2   2  210.98   22.00
  -3  -2   2  200.28   21.80
   3   2   2  207.48   23.10
  -2   3   2  183.48   21.40
   2  -3   2  225.58   21.90
  -3  -2   2  218.78   21.90
   2  -3   2  263.87   25.40
   3   2  -2  225.08   25.00
  -3  -2  -2  193.98   23.70
  -2   3  -2  240.68   24.30
   2  -3  -2  204.18   23.70
   3  -3   2  251.47   25.00
   3   3   2  222.88   25.20
   3  -3   2  283.67   27.80
  -3  -3   2  267.57   26.30
  -3  -3   2  282.47   25.30
   3   3   2  266.47   24.50
  -3   3   2  288.57   24.50
  -3   3   2  294.57   24.40
   3  -3  -2  288.87   26.40
  -3   3  -2  236.58   27.50
   3   3  -2  301.07   28.00
  -3  -3  -2  258.47   25.60
  -3   3  -2  270.77   25.40
   4  -3   2  857.01   45.90
   3   4   2  902.41   45.40
   4  -3   2  843.62   44.60
   3   4   2  839.92   44.70
  -4   3   2  842.12   43.10
  -3  -4   2  926.21   46.00
  -4   3   2  865.81   44.40
  -3  -4   2  938.61   46.40
   4  -3  -2  819.82   46.20
  -3  -4  -2  855.11   45.10
   3   4  -2  819.62   45.80
  -4   3  -2  923.21   46.10
  -4   3  -2  912.71   45.20
   4  -3  -2  829.32   44.30
   3   4  -2  885.31   45.10
  -3  -4  -2  814.12   44.70
  -4   2   2  450.35   30.70
   4  -2   2  471.45   31.50
   2   4   2  442.06   30.80
   2   4   2  461.65   30.50
  -2  -4   2  492.15   32.30
  -2  -4   2  473.25   32.00
   4  -2   2  437.26   32.30
  -4   2   2  438.86   31.30
   2   4  -2  463.55   32.50
   2   4  -2  410.16   30.80
  -4   2  -2  430.96   30.80
  -4   2  -2  381.56   30.30
  -2  -4  -2  442.56   31.90
   4  -2  -2  436.06   30.70
   1   4   2 2102.79   75.59
  -4   1   2 2065.99   74.79
   4  -1   2 2043.90   75.59
  -1  -4   2 1997.20   75.19
  -4   1   2 2021.50   74.69
   4  -1   2 2010.80   76.29
   1   4   2 2071.09   75.29
  -1  -4   2 2154.08   76.79
  -4   1  -2 2018.30   75.69
  -1  -4  -2 2057.59   76.39
   4  -1  -2 2014.10   75.59
   1   4  -2 2049.99   76.59
   4   0   2 6558.04  201.78
   0  -4   2 6406.66  201.68
   0   4   2 6434.16  200.28
   4   0   2 6521.35  201.98
  -4   0   2 6437.26  200.78
  -4   0   2 6762.82  201.88
   0   4   2 6564.94  200.98
  -4   0  -2 6535.85  201.78
   4   0  -2 6633.34  202.38
   0  -4  -2 6396.46  201.08
   0   4  -2 6455.95  202.38
  -4  -1   2 1920.21   72.79
   1  -4   2 1977.40   73.29
  -1   4   2 1860.01   71.19
  -1   4   2 1901.01   71.49
  -4  -1   2 1937.31   72.59
   4   1   2 1920.71   73.09
   1  -4   2 1919.81   73.09
   4   1   2 1990.10   73.09
   4   1  -2 1994.50   73.89
  -4  -1  -2 2026.20   73.89
  -1   4  -2 2007.60   73.79
  -4  -2   2  407.16   29.60
  -2   4   2  385.96   29.10
  -4  -2   2  423.06   31.20
   2  -4   2  427.36   31.60
   2  -4   2  351.56   28.40
   4   2   2  448.46   30.00
   4   2   2  411.66   30.70
  -4  -2  -2  423.16   30.40
  -2   4  -2  407.16   29.90
   2  -4  -2  344.67   28.00
  -2   4  -2  355.56   28.80
   4   2  -2  375.16   30.40
  -3   4   2  885.11   44.20
  -4  -3   2  938.71   46.50
  -3   4   2  836.72   44.30
   3  -4   2  944.01   46.50
   3  -4   2  975.10   47.90
  -4  -3   2  888.11   45.70
   4   3   2  964.30   47.60
   4   3   2  930.81   46.20
   4   3  -2  894.51   45.90
   3  -4  -2  861.01   45.50
  -3   4  -2  938.11   46.80
  -3   4  -2  983.40   46.80
  -4  -3  -2  769.72   43.90
   4   3  -2  979.10   48.60
   3  -4  -2  734.03   49.40
  -4  -3  -2  966.10   47.30
  -4  -4   2  125.49   20.70
  -4   4   2  119.79   19.30
   4  -4   2  144.09   20.90
   4  -4   2  144.49   21.50
  -4  -4   2  142.49   21.00
   4   4   2  174.68   21.80
   4   4   2   98.39   19.00
  -4   4   2  105.99   18.20
  -4  -4  -2  135.09   21.30
   4   4  -2  152.98   21.80
  -4   4  -2  152.38   21.50
   4  -4  -2  115.39   19.90
  -4  -4  -2  134.29   21.30
   4   4  -2  147.19   21.80
   4  -4  -2  129.39   19.80
  -4   4  -2  134.69   20.30
  -4  -5   2  142.79   21.90
  -5   4   2   98.59   18.50
   5  -4   2  118.59   21.40
   4   5   2  186.28   23.60
   4   5   2  127.49   21.20
  -4  -5   2  138.09   22.20
   5  -4   2  131.59   22.20
  -5   4   2  139.19   21.30
  -5   4  -2  154.68   22.30
   5  -4  -2  117.79   21.50
   5  -4  -2  106.39   20.40
   4   5  -2  119.69   22.70
  -4  -5  -2  123.19   21.90
  -5   4  -2  111.49   20.90
  -4  -5  -2  126.09   22.10
   4   5  -2   72.39   19.20
  -5   3   2  602.34   37.80
  -3  -5   2  616.64   39.70
  -3  -5   2  581.24   39.70
   5  -3   2  592.64   39.40
   3   5   2  664.13   40.50
   5  -3   2  646.24   41.50
  -5   3   2  556.94   38.10
   3   5   2  586.64   38.60
  -5   3  -2  617.44   39.80
   5  -3  -2  570.94   39.10
   5  -3  -2  547.45   38.30
   3   5  -2  515.45   38.80
  -3  -5  -2  557.24   40.20
  -5   3  -2  587.54   39.50
  -3  -5  -2  580.44   39.50
   3   5  -2  594.74   39.40
   2   5   2  147.49   20.30
  -2  -5   2  117.29   19.00
   2   5   2  141.19   19.70
  -2  -5   2  148.09   21.00
  -5   2   2  146.49   20.50
   5  -2   2  158.58   21.10
   5  -2   2  104.69   18.90
  -5   2   2  136.29   18.80
  -2  -5  -2  147.79   21.10
   2   5  -2  130.19   20.40
   5  -2  -2  135.79   20.80
  -5   2  -2  164.38   21.50
   5  -2  -2  153.88   20.40
   2   5  -2  149.19   21.50
  -5   2  -2  140.49   21.20
  -2  -5  -2  158.28   20.90
  -1  -5   2 1183.78   54.49
   1   5   2 1123.99   52.39
   1   5   2 1135.19   51.89
   5  -1   2 1203.38   54.29
   5  -1   2 1173.78   53.99
  -5   1   2 1129.59   52.69
  -1  -5   2 1154.58   52.79
  -5   1   2 1139.69   51.59
  -5   1  -2 1121.79   52.39
  -1  -5  -2  966.60   51.49
   5  -1  -2 1150.78   53.09
   1   5  -2 1189.78   54.39
   5  -1  -2 1041.30   51.19
   1   5  -2 1153.08   53.79
  -1  -5  -2 1156.28   52.99
  -5   1  -2 1160.68   53.49
  -5   0   2  249.28   26.30
   5   0   2  291.97   28.10
   0  -5   2  267.77   26.90
   0   5   2  278.27   26.20
  -5   0   2  254.37   25.70
   0   5   2  279.17   26.70
   5   0   2  295.87   27.20
   5   0  -2  267.17   27.40
   0  -5  -2  246.88   26.30
   0   5  -2  258.97   28.10
  -5   0  -2  290.67   28.80
   5   0  -2  269.67   26.00
   0   5  -2  223.88   25.90
  -5   0  -2  247.78   27.30
   0  -5  -2  181.48   26.10
   5   1   2 1307.97   58.09
  -1   5   2 1244.18   55.39
   5   1   2 1267.07   56.59
   1  -5   2 1228.68   55.79
   1  -5   2 1234.98   56.19
  -1   5   2 1272.47   55.59
  -5  -1   2 1280.27   56.39
  -5  -1   2 1298.27   56.19
  -1   5  -2 1290.47   57.19
  -1   5  -2 1301.57   57.59
  -5  -1  -2 1200.68   55.99
   1  -5  -2 1081.29   57.59
   5   1  -2 1230.48   56.39
  -5  -1  -2 1244.48   56.29
   5   1  -2 1286.37   57.79
   2  -5   2  136.89   20.30
  -5  -2   2  152.78   21.40
  -5  -2   2  109.99   17.50
   5   2   2  139.49   20.00
  -2   5   2  150.58   20.60
  -2   5   2  144.99   18.90
   5   2   2  145.89   20.40
   2  -5   2  117.39   19.50
   5   2  -2  137.79   20.60
   5   2  -2  146.09   21.60
  -5  -2  -2  165.58   21.60
  -5  -2  -2  148.09   21.20
   2  -5  -2  129.69   19.20
   2  -5  -2  137.59   20.30
  -2   5  -2  156.58   21.10
   5   3   2  654.23   41.50
  -3   5   2  605.94   39.00
   3  -5   2  640.54   41.20
   5   3   2  636.54   41.90
  -5  -3   2  664.83   41.10
   3  -5   2  660.33   41.70
  -5  -3   2  676.13   41.10
  -5  -3  -2  622.24   41.30
   5   3  -2  574.94   40.50
  -5  -3  -2  664.33   41.60
  -3   5  -2  608.24   40.60
   3  -5  -2  631.74   40.20
  -3   5  -2  644.74   41.50
   3  -5  -2  662.43   42.00
   5   3  -2  610.74   41.40
   5   4   2  125.49   21.00
   4  -5   2  142.79   22.50
  -5  -4   2  137.19   22.50
  -4   5   2  127.79   20.80
  -4   5   2   91.29   18.50
  -5  -4   2  160.58   22.70
   5   4   2  142.79   21.80
   4  -5   2  132.09   21.40
  -5  -4  -2  149.09   23.20
   5   4  -2  141.89   23.20
  -5  -4  -2  190.98   25.30
   5   4  -2  138.49   22.30
  -4   5  -2  168.48   23.60
   4  -5  -2  135.69   21.40
  -4   5  -2  228.58   28.00
   4  -5  -2  134.59   22.20
  -5   5   2   19.10   16.10
  -5  -5   2   -3.10   14.50
  -5   5   2   11.70   12.80
   5  -5   2    2.50   16.90
   5   5   2    7.80   15.70
   5   5   2   12.70   16.50
  -5  -5   2   18.40   16.90
   5  -5   2   11.30   15.80
  -5  -5  -2   48.30   18.70
   5   5  -2   20.40   16.60
  -5  -5  -2   13.50   16.70
  -5   5  -2   -0.20   13.80
   5  -5  -2   14.90   16.60
   5   5  -2   22.20   16.90
   5  -5  -2    7.80   16.00
  -5   5  -2   -2.80   14.20
  -6   5   2  960.20   54.69
   5   6   2  984.30   56.39
   6  -5   2  980.90   59.29
  -5  -6   2 1015.60   58.39
  -6   5   2  933.11   56.29
   6  -5   2  947.21   58.79
  -5  -6   2  958.00   56.79
   5   6   2  966.30   56.69
  -6   5  -2  916.21   56.09
  -5  -6  -2  859.81   57.09
  -5  -6  -2  974.60   58.09
   5   6  -2 1087.49   59.19
   6  -5  -2  919.21   55.79
  -6   5  -2 1046.80   58.59
   6  -5  -2 1056.79   59.89
   5   6  -2 1002.70   58.99
  -6   4   2   71.59   17.50
   4   6   2   98.59   21.70
   6  -4   2   60.99   20.40
  -4  -6   2  102.19   21.00
  -4  -6   2   85.59   21.50
   4   6   2   92.89   20.70
   6  -4   2   97.59   20.80
  -6   4   2   79.79   20.20
   6  -4  -2  108.79   21.80
  -4  -6  -2   71.49   21.20
  -4  -6  -2   88.09   21.00
  -6   4  -2   82.59   20.70
   4   6  -2   81.49   20.50
  -6   4  -2  102.39   21.50
   6  -4  -2   80.19   20.50
   4   6  -2   78.29   20.40
   3   6   2   44.20   16.80
  -3  -6   2   -9.50   15.50
  -6   3   2   18.50   14.90
  -6   3   2   13.90   13.60
   3   6   2   11.30   14.50
   6  -3   2   15.20   15.80
  -3  -6   2   46.80   16.80
   6  -3   2   22.80   16.70
  -3  -6  -2   19.10   16.30
   3   6  -2    1.60   15.00
   6  -3  -2   34.90   17.60
  -6   3  -2   43.80   16.90
  -6   3  -2   29.60   15.50
  -3  -6  -2   18.20   16.00
   6  -3  -2   32.50   16.60
   3   6  -2   27.60   16.10
  -2  -6   2  352.16   33.60
  -6   2   2  338.27   33.10
  -6   2   2  362.86   31.60
  -2  -6   2  379.36   34.10
   2   6   2  385.16   32.50
   6  -2   2  388.56   33.80
   6  -2   2  379.36   34.20
   2   6   2  376.06   33.50
   2   6  -2  373.26   35.40
   6  -2  -2  342.67   35.20
  -6   2  -2  382.56   33.10
   6  -2  -2  387.66   33.70
  -2  -6  -2  355.96   35.00
  -2  -6  -2  339.77   34.90
  -6   2  -2  378.26   33.80
   2   6  -2  364.16   33.60
   6  -1   2 1055.49   53.39
   1   6   2  896.71   48.60
   1   6   2  871.71   49.20
   6  -1   2  937.11   50.89
  -1  -6   2  988.60   52.09
  -6   1   2  877.11   48.60
  -6   1   2  971.00   50.69
  -1  -6   2  923.31   49.80
   1   6  -2 1025.80   52.79
  -6   1  -2  992.50   51.19
   6  -1  -2  894.51   50.89
  -1  -6  -2  969.60   51.19
  -1  -6  -2  985.90   51.29
  -6   1  -2  961.70   50.99
   6  -1  -2  997.80   51.19
   1   6  -2  950.90   51.69
  -6   0   2  890.61   48.80
   0   6   2  917.81   49.10
  -6   0   2  914.71   49.40
   0  -6   2  989.90   50.99
   6   0   2  988.20   51.59
   0   6   2  878.91   48.90
   6   0   2 1028.60   51.79
   0   6  -2 1018.20   52.59
   0  -6  -2  944.01   50.59
   0   6  -2  972.20   50.69
   6   0  -2  932.41   50.19
   0  -6  -2  960.50   50.79
   6   0  -2 1013.40   53.19
  -6   0  -2  974.00   51.89
  -6   0  -2  973.00   51.29
  -6  -1   2  940.21   49.30
  -1   6   2  875.21   47.40
   6   1   2  867.71   47.80
   6   1   2  861.21   48.30
   1  -6   2  918.31   48.20
  -6  -1   2  836.22   46.80
   1  -6   2  906.81   48.90
  -1   6   2  889.51   47.80
   1  -6  -2  767.72   46.40
  -1   6  -2  879.21   48.50
   6   1  -2  870.41   49.20
  -6  -1  -2  853.91   49.10
  -1   6  -2  882.21   48.30
   6   1  -2  840.22   49.70
  -6  -1  -2  917.31   49.99
  -6  -2   2  429.06   34.40
  -6  -2   2  418.76   35.70
   6   2   2  414.46   35.70
  -2   6   2  422.46   35.00
  -2   6   2  376.36   31.80
   6   2   2  417.06   35.00
   2  -6   2  442.16   35.40
   2  -6   2  450.15   36.50
  -6  -2  -2  427.16   36.10
  -2   6  -2  393.46   35.20
  -6  -2  -2  425.86   36.40
   2  -6  -2  428.96   36.20
   6   2  -2  407.26   36.20
   2  -6  -2  326.57   32.50
   6   2  -2  426.96   36.10
   3  -6   2   21.40   15.60
  -6  -3   2   30.40   13.90
   3  -6   2   30.30   16.80
  -3   6   2   35.60   15.00
   6   3   2   45.80   16.20
  -6  -3   2   36.30   16.80
   6   3   2   36.60   16.30
   6   3  -2   17.40   15.10
  -6  -3  -2   32.60   17.10
  -3   6  -2   34.90   15.90
   3  -6  -2   10.50   15.60
   6   3  -2   52.39   18.10
  -3   6  -2   29.60   15.10
   3  -6  -2   29.20   17.40
  -6  -3  -2   31.50   16.80
   6   4   2   96.69   21.70
  -6  -4   2   99.99   21.10
  -4   6   2  119.59   20.60
   4  -6   2   95.59   21.00
   6   4   2  114.39   22.40
  -4   6   2  121.89   22.10
   4  -6   2   90.69   22.30
  -6  -4   2   56.29   19.80
  -6  -4  -2   80.89   22.00
   4  -6  -2   92.29   21.30
   6   4  -2  130.39   24.00
   4  -6  -2   81.09   20.20
  -4   6  -2   92.79   20.90
  -6  -4  -2  106.69   22.30
   6   4  -2  100.39   21.70
  -4   6  -2  108.79   22.30
   5  -6   2  986.00   59.09
  -5   6   2 1010.00   55.89
   5  -6   2  943.91   58.29
  -6  -5   2 1040.10   59.29
   6   5   2  998.60   57.79
  -5   6   2 1008.00   56.59
  -6  -5   2  965.80   57.09
   6   5   2  972.60   58.19
   5  -6  -2 1075.39   59.09
  -5   6  -2  971.20   57.39
   6   5  -2  892.51   56.09
   5  -6  -2  954.00   57.69
   6   5  -2  948.21   58.19
  -6  -5  -2  965.30   58.09
  -6  -5  -2 1007.10   59.19
  -5   6  -2  950.50   57.19
   6  -6   2   38.00   21.80
   6   6   2   62.79   21.70
  -6   6   2   91.49   21.70
  -6  -6   2   84.69   23.30
  -6   6   2  141.59   24.00
   6  -6   2   76.29   22.60
   6   6   2   77.59   21.80
  -6  -6   2   45.20   21.20
  -6  -6  -2   53.09   23.20
   6  -6  -2   69.19   22.40
   6   6  -2   57.29   22.30
  -6   6  -2   61.89   20.70
   6  -6  -2   73.59   22.20
  -6   6  -2   76.69   29.00
  -6  -6  -2   45.90   20.30
   6   6  -2   40.60   21.20
  -6  -7   2  229.48   31.80
  -7   6   2  265.27   33.00
   6   7   2  207.38   30.50
   6   7   2  215.28   30.30
   7  -6   2  189.58   30.20
  -7   6   2  278.67   32.70
   7  -6   2  221.38   31.90
  -6  -7   2  318.87   38.60
   7  -6  -2  177.38   29.10
  -6  -7  -2  209.28   31.80
   6   7  -2  249.58   33.70
  -6  -7  -2  248.48   34.00
  -7   6  -2  224.98   31.10
  -7   6  -2  308.17   36.50
   6   7  -2  189.78   30.90
   7  -6  -2  233.58   32.30
   5   7   2  495.95   44.40
   7  -5   2  608.04   48.20
   7  -5   2  497.45   45.40
  -7   5   2  512.15   42.40
  -5  -7   2  438.76   44.50
  -7   5   2  556.34   44.20
   5   7   2  619.84   47.50
  -5  -7   2  456.85   43.10
  -5  -7  -2  499.35   45.10
   5   7  -2  511.65   45.60
   5   7  -2  525.35   48.40
  -7   5  -2  399.96   56.09
   7  -5  -2  587.44   48.20
  -7   5  -2  505.95   43.30
  -5  -7  -2  560.04   46.00
   7  -5  -2  500.35   44.30
  -4  -7   2  416.36   40.40
   7  -4   2  483.55   44.30
   4   7   2  495.85   41.30
  -7   4   2  473.25   40.70
   7  -4   2  479.95   42.70
   4   7   2  486.05   42.50
  -4  -7   2  470.05   42.70
  -7   4   2  432.26   40.70
   7  -4  -2  408.66   39.90
  -7   4  -2  411.46   40.10
   7  -4  -2  455.45   42.60
   4   7  -2  486.05   42.40
  -4  -7  -2  492.35   44.80
  -7   4  -2  497.65   42.70
   4   7  -2  452.65   42.30
  -4  -7  -2  385.46   41.40
   3   7   2  402.66   37.40
   7  -3   2  351.16   38.40
  -7   3   2  455.55   37.30
   7  -3   2  406.06   40.00
  -7   3   2  445.46   38.40
  -3  -7   2  396.46   39.30
   3   7   2  469.35   38.60
  -3  -7   2  438.06   40.10
   7  -3  -2  480.55   41.50
   3   7  -2  403.66   40.10
  -7   3  -2  403.76   38.90
   7  -3  -2  424.06   38.50
  -7   3  -2  416.56   38.90
   3   7  -2  518.55   42.10
  -3  -7  -2  452.65   41.40
  -3  -7  -2  443.96   40.10
  -7   2   2  262.27   29.90
   2   7   2  288.17   32.40
  -2  -7   2  305.07   33.60
  -7   2   2  294.87   31.70
  -2  -7   2  300.67   34.40
   7  -2   2  296.87   33.90
   2   7   2  293.87   32.20
   7  -2   2  300.97   35.60
  -2  -7  -2  283.97   33.90
   2   7  -2  290.17   34.30
  -7   2  -2  323.87   33.30
   7  -2  -2  318.27   36.30
   2   7  -2  279.97   34.70
  -2  -7  -2  324.77   35.00
  -7   2  -2  276.37   32.60
   7  -2  -2  202.68   27.10
  -1  -7   2  520.35   40.10
  -7   1   2  495.75   39.00
   7  -1   2  535.05   40.50
   1   7   2  536.85   39.70
   1   7   2  508.85   39.00
  -7   1   2  500.05   37.90
   7  -1   2  568.14   42.10
  -1  -7   2  479.45   39.90
   7  -1  -2  550.84   42.30
   1   7  -2  530.15   41.00
  -1  -7  -2  508.35   41.00
   7  -1  -2  473.85   38.90
  -7   1  -2  521.15   39.80
   1   7  -2  530.15   41.50
  -7   1  -2  512.35   40.00
  -1  -7  -2  460.85   39.10
  -7   0   2  464.35   37.80
   0   7   2  428.46   35.50
   7   0   2  440.36   38.00
   7   0   2  484.95   38.90
   0   7   2  460.15   37.60
  -7   0   2  554.54   38.90
   0  -7   2  528.75   39.80
  -7   0  -2  416.86   37.00
  -7   0  -2  486.45   39.10
   7   0  -2  463.45   38.00
   0   7  -2  492.15   40.00
   0  -7  -2  457.15   39.10
   7   0  -2  506.45   40.50
   0  -7  -2  495.15   40.00
   0   7  -2  492.35   38.80
   1  -7   2  443.86   39.80
  -7  -1   2  515.55   40.50
  -1   7   2  524.85   38.40
   7   1   2  527.05   42.00
  -1   7   2  516.15   39.40
  -7  -1   2  508.45   39.10
   7   1   2  551.04   41.10
   1  -7   2  541.85   41.30
  -1   7  -2  562.94   41.40
   7   1  -2  584.94   43.10
  -1   7  -2  564.84   42.20
  -7  -1  -2  539.45   41.30
   1  -7  -2  504.25   41.30
  -7  -1  -2  537.55   41.20
   7   1  -2  564.54   41.40
  -7  -2   2  381.66   34.80
   7   2   2  316.57   35.90
   2  -7   2  360.66   37.40
  -7  -2   2  342.37   35.30
   7   2   2  328.77   34.50
  -2   7   2  348.07   34.30
   2  -7   2  344.07   35.80
  -2   7   2  362.16   33.30
  -7  -2  -2  352.56   36.30
   2  -7  -2  308.77   34.00
   2  -7  -2  333.67   34.50
  -2   7  -2  344.17   35.10
   7   2  -2  331.07   36.10
   7   2  -2  326.17   36.60
  -2   7  -2  375.86   36.20
  -7  -2  -2  328.17   35.50
   7   3   2  555.14   42.50
   3  -7   2  467.75   40.50
  -7  -3   2  460.95   40.40
   7   3   2  531.35   42.00
  -3   7   2  452.05   38.00
  -3   7   2  457.55   40.00
   3  -7   2  490.45   41.10
  -7  -3   2  454.55   38.90
  -7  -3  -2  547.45   42.50
  -3   7  -2  451.65   39.60
   3  -7  -2  422.06   40.40
   3  -7  -2  413.86   39.50
  -7  -3  -2  480.55   42.20
   7   3  -2  502.45   42.10
   7   3  -2  480.35   43.40
   4  -7   2  511.65   43.40
  -7  -4   2  451.15   41.00
  -4   7   2  521.45   41.70
   7   4   2  518.25   45.80
   4  -7   2  477.75   44.50
   7   4   2  459.65   43.50
  -7  -4   2  548.55   45.20
   7   4  -2  447.76   42.90
  -4   7  -2  531.45   43.40
  -4   7  -2  441.26   41.70
  -7  -4  -2  451.35   43.10
   7   4  -2  447.46   41.80
  -7  -4  -2  545.95   44.10
   4  -7  -2  566.54   46.00
   4  -7  -2  500.95   43.70
   5  -7   2  550.14   46.10
  -7  -5   2  469.05   44.10
  -7  -5   2  477.95   44.50
  -5   7   2  553.34   44.50
   7   5   2  550.94   46.80
  -5   7   2  519.55   43.50
   5  -7   2  499.85   46.30
   7   5   2  550.64   45.70
  -7  -5  -2  560.04   47.90
   5  -7  -2  497.15   44.60
   7   5  -2  580.34   47.90
   7   5  -2  567.24   47.70
   5  -7  -2  576.94   45.70
  -5   7  -2  569.94   45.10
  -7  -5  -2  559.34   47.80
   6  -7   2  217.08   31.50
  -6   7   2  276.57   32.60
  -6   7   2  250.77   32.00
  -7  -6   2  259.97   33.80
   7   6   2  258.07   33.00
   7   6   2  186.28   29.50
  -7  -6   2  183.38   29.50
   6  -7   2  207.88   31.70
   7   6  -2  201.88   31.90
   6  -7  -2  312.27   37.70
  -7  -6  -2  252.07   33.70
  -6   7  -2  207.88   30.70
   6  -7  -2  344.47   39.80
  -6   7  -2  230.78   31.80
  -7  -6  -2  254.47   39.00
   7   6  -2  175.48   29.20
   7   7   2    3.20   17.50
   7   7   2  -21.20   16.40
   7  -7   2    6.10   19.20
  -7  -7   2   10.10   19.30
  -7  -7   2   -5.70   16.40
  -7   7   2   15.40   15.60
  -7   7   2   12.10   16.80
   7  -7   2  -28.10   20.00
  -7   7  -2  -12.50   14.80
   7  -7  -2   11.00   17.80
   7   7  -2    4.30   18.70
  -7  -7  -2   20.20   20.50
  -7  -7  -2  -23.10   16.90
  -7   7  -2  -14.00   15.40
   7   7  -2   11.10   19.60
   7  -7  -2   -5.80   20.20
  -8   7   2  319.17   40.30
  -7  -8   2  346.07   41.80
   7   8   2  265.67   35.40
   7   8   2  328.67   40.60
   8  -7   2  244.58   34.30
   8  -7   2  219.58   33.50
  -8   7   2  360.86   38.60
  -7  -8   2  290.77   47.10
  -7  -8  -2  224.58   33.80
   8  -7  -2  358.76   43.60
   7   8  -2  273.17   37.60
  -8   7  -2  242.88   34.20
   7   8  -2  231.08   36.20
  -8   7  -2  274.97   36.70
   8  -7  -2  228.68   33.40
  -7  -8  -2  396.16   43.10
  -8   6   2  194.88   27.60
  -8   6   2  230.98   31.60
   8  -6   2  150.98   37.30
   6   8   2  191.88   30.60
   6   8   2  239.18   33.40
   8  -6   2  208.08   32.20
  -6  -8   2  205.88   32.20
  -6  -8   2  265.97   34.80
  -8   6  -2  263.97   33.70
  -6  -8  -2  202.88   33.00
  -8   6  -2  255.27   33.90
   8  -6  -2  197.38   32.00
   8  -6  -2  186.98   31.70
  -6  -8  -2  172.48   30.70
   6   8  -2  196.38   32.30
   6   8  -2  167.78   30.20
  -8   5   2   14.10   19.10
   8  -5   2   35.80   22.40
   5   8   2   34.70   20.60
   8  -5   2   18.70   21.30
  -5  -8   2   15.00   20.10
  -5  -8   2    7.60   19.80
  -8   5   2   13.50   14.50
   5   8   2   18.80   17.50
   5   8  -2   15.30   19.10
  -8   5  -2    8.10   16.70
   8  -5  -2   13.60   23.00
  -5  -8  -2   31.40   19.20
  -5  -8  -2    0.60   26.90
   5   8  -2   20.70   19.60
   8  -5  -2    4.90   17.80
  -8   5  -2   13.20   18.00
  -8   4   2  332.37   37.60
   4   8   2  323.47   37.20
  -4  -8   2  305.97   38.70
   4   8   2  345.47   37.50
  -8   4   2  351.46   36.60
   8  -4   2  329.97   41.10
  -4  -8   2  320.87   38.70
   8  -4   2  380.96   42.00
  -4  -8  -2  328.97   40.00
  -4  -8  -2  329.07   41.40
   8  -4  -2  358.96   39.10
  -8   4  -2  334.47   37.60
   4   8  -2  344.17   40.50
  -8   4  -2  398.66   45.00
   4   8  -2  334.57   41.40
   8  -4  -2  362.36   39.80
   3   8   2  657.03   48.40
  -8   3   2  610.94   46.90
   8  -3   2  653.83   49.80
  -3  -8   2  605.64   48.40
   8  -3   2  703.73   52.49
  -8   3   2  686.43   48.20
   3   8   2  676.03   48.40
  -3  -8   2  674.53   49.40
  -3  -8  -2  680.83   51.49
  -8   3  -2  635.24   48.50
   3   8  -2  693.23   50.19
   3   8  -2  654.63   58.39
   8  -3  -2  623.04   49.50
  -3  -8  -2  524.55   46.50
  -8   3  -2  666.03   54.29
   8  -3  -2  596.24   48.60
   8  -2   2   87.69   21.70
  -8   2   2   92.59   22.20
  -2  -8   2   56.19   20.80
   2   8   2   88.09   22.70
  -2  -8   2   49.30   21.30
   2   8   2  100.79   23.40
  -8   2   2   69.69   18.90
   8  -2   2   66.39   22.10
   8  -2  -2   72.89   21.60
   2   8  -2   51.49   20.20
   8  -2  -2   55.69   23.30
  -2  -8  -2   68.69   21.50
   2   8  -2   67.99   21.90
  -8   2  -2   90.09   22.70
  -2  -8  -2   89.99   23.20
  -8   2  -2  119.29   22.90
  -8   1   2  149.49   25.70
   1   8   2  163.08   25.60
   8  -1   2   88.69   24.30
   8  -1   2  136.39   24.60
   1   8   2  126.79   23.50
  -1  -8   2  134.19   25.40
  -1  -8   2  123.89   24.20
  -8   1   2  126.09   21.20
  -1  -8  -2  118.89   24.60
   1   8  -2  130.49   25.70
   8  -1  -2  150.28   27.10
   1   8  -2  125.99   25.20
  -1  -8  -2  130.79   25.60
  -8   1  -2  152.78   25.60
   8  -1  -2  140.69   24.10
  -8   1  -2  116.89   23.90
  -8   0   2   62.49   18.00
   8   0   2   62.59   21.80
   8   0   2   65.19   22.10
  -8   0   2   53.99   20.20
   0   8   2   45.00   19.40
   0   8   2   58.19   18.80
   0  -8   2   52.69   20.50
   0  -8  -2   42.50   20.40
   8   0  -2   62.89   22.10
  -8   0  -2   84.59   22.10
   0   8  -2   70.09   21.60
   0  -8  -2   63.19   21.50
   8   0  -2   73.49   21.90
   0   8  -2   47.90   20.30
  -8   0  -2  104.59   22.70
   1  -8   2   99.69   23.00
  -1   8   2  125.79   23.50
   8   1   2   98.49   24.50
   8   1   2  121.99   23.80
  -8  -1   2   75.79   19.10
  -8  -1   2  107.29   23.70
  -1   8   2  102.39   22.00
   1  -8   2  112.19   23.60
  -1   8  -2  113.49   24.50
   8   1  -2  142.39   25.20
  -1   8  -2  155.18   26.30
  -8  -1  -2  121.39   24.90
   8   1  -2  118.69   25.50
   1  -8  -2  121.59   24.60
  -8  -1  -2  152.88   26.30
   8   2   2  144.89   26.20
  -2   8   2  166.48   26.90
  -2   8   2  134.09   24.00
   2  -8   2  159.78   25.80
  -8  -2   2  103.69   21.40
   2  -8   2  143.19   26.80
   8   2   2  132.09   26.20
  -8  -2   2  177.28   28.00
  -8  -2  -2  194.48   28.50
  -8  -2  -2  123.39   25.80
   2  -8  -2  130.39   24.80
  -2   8  -2  183.98   28.50
   2  -8  -2  166.18   26.90
   8   2  -2  170.88   28.00
  -2   8  -2  146.99   26.30
   8   2  -2  165.98   27.40
   3  -8   2  674.33   50.89
  -3   8   2  578.14   44.70
  -8  -3   2  609.74   46.00
  -8  -3   2  620.14   47.30
   8   3   2  620.24   48.40
   3  -8   2  628.24   48.20
  -3   8   2  573.54   45.90
   8   3   2  603.04   46.90
  -8  -3  -2  678.73   49.20
   3  -8  -2  657.43   50.09
   3  -8  -2  626.64   47.80
   8   3  -2  652.53   50.59
   8   3  -2  640.24   49.00
  -3   8  -2  656.03   49.40
  -8  -3  -2  645.24   48.80
   4  -8   2  330.77   40.70
   8   4   2  330.77   37.90
  -8  -4   2  301.07   36.30
   4  -8   2  375.86   39.70
  -4   8   2  332.37   37.20
  -8  -4   2  298.07   35.50
   8   4   2  405.26   41.50
  -4   8   2  309.07   34.80
   8   4  -2  384.56   40.00
  -4   8  -2  410.46   40.10
  -8  -4  -2  361.66   42.30
   8   4  -2  286.07   41.70
   4  -8  -2  252.37   32.30
   4  -8  -2  350.66   41.40
  -8  -4  -2  329.17   37.70
  -8  -5   2   -9.50   12.70
  -8  -5   2    6.90   18.70
  -5   8   2   24.00   16.40
   8   5   2   22.70   19.30
   8   5   2    9.10   17.30
   5  -8   2    3.50   19.50
   5  -8   2   10.80   19.50
  -8  -5  -2  -18.10   16.80
   8   5  -2   49.80   21.60
  -5   8  -2    9.00   16.00
  -8  -5  -2   22.10   24.30
   5  -8  -2   14.60   19.90
   8   5  -2   10.10   19.50
  -5   8  -2   24.60   18.70
   5  -8  -2   22.20   18.20
  -6   8   2  184.48   27.10
  -8  -6   2  175.38   30.50
   8   6   2  193.68   30.20
   6  -8   2  149.99   28.40
   8   6   2  163.38   29.00
  -8  -6   2  200.88   30.70
  -6   8   2  178.18   28.80
   6  -8   2  168.38   41.60
  -8  -6  -2  174.98   29.50
   8   6  -2  164.48   30.60
   6  -8  -2  192.28   30.00
  -6   8  -2  193.18   29.60
  -6   8  -2  173.98   29.10
   8   6  -2  176.98   29.80
   6  -8  -2  147.59   31.90
  -8  -6  -2  168.78   29.20
  -8  -7   2  228.78   49.40
   7  -8   2  257.97   36.10
  -7   8   2  331.27   38.30
   8   7   2  343.07   42.90
   7  -8   2  357.66   42.30
   8   7   2  340.97   42.60
  -8  -7   2  288.57   38.40
  -7   8   2  363.46   41.00
   8   7  -2  296.17   38.10
  -7   8  -2  328.37   40.80
  -8  -7  -2  260.17   36.40
   8   7  -2  378.16   44.80
  -7   8  -2  375.16   42.50
   7  -8  -2  405.86   44.40
   7  -8  -2  233.48   34.10
  -8  -7  -2  338.87   42.90
   8  -8   2   -7.00   20.20
   8   8   2   36.10   33.70
   8  -8   2    6.60   19.00
   8   8   2    6.20   20.30
  -8   8   2  -15.20   15.20
  -8   8   2   -0.70   14.30
  -8  -8   2   38.20   23.10
  -8  -8   2   41.50   21.90
  -8   8  -2    0.00   18.70
   8  -8  -2   49.50   23.60
   8  -8  -2  -10.80   20.20
   8   8  -2   21.00   22.40
   8   8  -2   43.10   23.40
  -8   8  -2   30.50   19.80
  -8  -8  -2  -12.70   20.60
  -8  -8  -2   18.50   19.40
   9  -8   2  105.69   29.80
   8   9   2   82.99   45.00
   9  -8   2   59.09   27.60
  -8  -9   2   85.19   26.70
  -9   8   2   82.89   26.60
  -9   8   2  165.38   32.00
   8   9   2  123.39   28.30
  -8  -9   2  101.99   30.10
   8   9  -2  113.09   29.60
   9  -8  -2  148.89   29.80
  -8  -9  -2   81.69   28.00
   9  -8  -2   98.49   29.90
  -9   8  -2  146.09   28.90
  -9   8  -2  135.89   28.60
   8   9  -2  168.98   31.60
  -8  -9  -2   70.59   26.30
  -7  -9   2   20.00   22.20
  -7  -9   2   25.50   20.70
   7   9   2   18.50   19.90
  -9   7   2   18.00   18.90
  -9   7   2   32.80   17.30
   9  -7   2   62.69   25.40
   9  -7   2   -1.50   19.80
   9  -7  -2   21.50   20.80
  -7  -9  -2   14.50   19.10
  -9   7  -2   34.50   21.70
  -7  -9  -2    6.00   20.30
   7   9  -2    2.60   20.10
  -9   7  -2   48.30   23.20
   7   9  -2   17.50   21.90
   9  -7  -2   -0.40   22.60
  -9   6   2  440.16   45.40
  -6  -9   2  391.46   46.80
   9  -6   2  389.86   45.70
  -9   6   2  435.06   44.10
   6   9   2  423.76   44.90
   9  -6   2  454.85   46.90
  -6  -9   2  515.65   48.40
   6   9   2  436.76   46.00
   9  -6  -2  503.85   48.20
   6   9  -2  418.76   47.20
  -6  -9  -2  441.06   48.40
  -6  -9  -2  371.26   45.20
  -9   6  -2  421.16   45.50
  -9   6  -2  507.75   47.90
   6   9  -2  461.75   48.10
   9  -6  -2  460.35   47.50
   5   9   2   29.40   20.40
  -9   5   2    0.50   15.10
   5   9   2    0.70   16.90
  -9   5   2   30.70   19.50
  -5  -9   2   47.20   21.30
   9  -5   2    1.60   19.20
   5   9  -2   37.40   21.70
  -5  -9  -2   23.20   20.00
   9  -5  -2   24.20   21.60
  -9   5  -2   43.10   19.10
  -5  -9  -2   15.90   20.00
  -9   5  -2   16.40   17.90
   5   9  -2    0.60   17.00
   9  -5  -2   38.40   20.90
   9  -4   2   39.80   21.80
  -4  -9   2   32.00   20.20
  -9   4   2   46.20   19.00
   4   9   2   54.59   21.40
  -9   4   2   61.69   21.40
   9  -4   2   40.90   21.90
  -4  -9   2   21.80   21.40
   4   9   2   41.80   19.30
  -4  -9  -2   14.90   22.40
  -9   4  -2   39.60   19.70
   9  -4  -2   49.99   22.50
   4   9  -2   25.90   20.90
  -4  -9  -2   41.90   21.90
   9  -4  -2   28.10   22.20
  -9   4  -2   57.59   21.30
   4   9  -2   39.30   21.70
   3   9   2 1066.79   63.59
  -3  -9   2 1099.19   65.59
  -9   3   2  937.31   59.39
   9  -3   2 1056.39   65.59
  -9   3   2 1068.59   64.29
   9  -3   2 1102.19   66.19
   3   9   2 1019.70   62.69
  -3  -9   2 1058.99   64.59
   3   9  -2 1103.29   66.19
   3   9  -2 1024.00   63.29
   9  -3  -2 1100.79   66.19
  -9   3  -2  984.80   62.59
  -3  -9  -2 1137.49   65.09
  -3  -9  -2 1037.00   75.69
  -9   3  -2 1078.79   63.89
   9  -2   2  176.68   28.60
  -9   2   2  282.17   34.30
   2   9   2  197.18   30.30
  -9   2   2  235.88   32.10
  -2  -9   2  205.68   30.30
   9  -2   2  139.89   27.90
  -2  -9   2  216.28   31.10
   2   9   2  187.78   28.20
   2   9  -2  205.98   30.90
  -2  -9  -2  216.08   31.00
  -2  -9  -2  206.38   30.50
  -9   2  -2  242.48   32.00
   9  -2  -2  228.28   31.00
   2   9  -2  203.38   30.20
  -9   2  -2  234.98   31.70
   9  -2  -2  174.98   29.70
   9  -1   2  447.66   44.10
   1   9   2  418.66   40.30
   1   9   2  440.56   41.70
  -9   1   2  467.45   41.60
  -9   1   2  493.05   43.20
   9  -1   2  453.75   42.90
  -1  -9   2  475.05   44.20
  -1  -9   2  401.66   41.00
   1   9  -2  434.26   43.30
  -1  -9  -2  377.46   40.70
   9  -1  -2  438.06   43.30
  -9   1  -2  459.95   53.19
  -1  -9  -2  523.75   46.60
   9  -1  -2  448.26   44.50
   1   9  -2  455.75   44.40
  -9   1  -2  468.35   43.00
  -9   0   2   47.40   16.30
  -9   0   2   46.90   20.50
   0   9   2   20.20   16.00
   0  -9   2   22.30   19.60
   9   0   2   39.60   20.30
   9   0   2   30.90   19.70
   0   9   2   -2.70   16.70
  -9   0  -2   46.80   20.00
   0   9  -2   30.70   18.90
   0  -9  -2   44.60   21.00
   9   0  -2    2.20   17.10
  -9   0  -2   15.70   29.10
   0  -9  -2   13.10   19.80
   0   9  -2   18.60   18.70
   9   0  -2   41.60   19.70
  -1   9   2  427.36   42.30
   1  -9   2  492.15   44.40
   9   1   2  471.45   43.10
   9   1   2  494.65   44.70
  -1   9   2  409.86   39.70
  -9  -1   2  455.25   40.80
   1  -9   2  520.35   46.50
  -9  -1   2  450.85   43.40
   1  -9  -2  412.76   43.00
   9   1  -2  425.96   42.40
  -9  -1  -2  404.96   58.29
  -1   9  -2  462.05   43.70
   9   1  -2  375.26   45.00
  -1   9  -2  423.06   41.60
  -9  -1  -2  479.45   42.90
   2  -9   2  206.28   30.10
   2  -9   2  342.57   39.90
  -2   9   2  201.68   31.20
  -9  -2   2  228.88   32.50
   9   2   2  220.78   30.90
  -2   9   2  271.87   33.50
  -9  -2   2  269.47   33.60
   9   2   2  317.77   38.00
  -2   9  -2  210.58   31.60
  -9  -2  -2  276.77   42.50
   9   2  -2  231.78   32.40
  -2   9  -2  246.58   32.60
   2  -9  -2  204.98   30.00
  -9  -2  -2  225.88   31.70
   2  -9  -2  179.88   29.40
  -3   9   2  998.80   62.49
  -9  -3   2  976.50   62.29
  -3   9   2  919.81   57.79
   3  -9   2 1131.19   64.89
   9   3   2 1066.29   64.19
   9   3   2  998.00   62.99
  -9  -3   2  887.11   57.59
   3  -9   2  998.60   63.09
   9   3  -2  893.01   60.89
  -3   9  -2  979.80   62.79
  -9  -3  -2  923.21   61.89
   9   3  -2  855.21   60.49
  -3   9  -2  982.90   60.59
  -9  -3  -2  928.71   61.19
   3  -9  -2  995.60   65.99
   3  -9  -2 1066.99   62.69
   4  -9   2   88.59   29.00
   9   4   2   70.19   23.30
   9   4   2   57.19   20.50
  -9  -4   2   56.39   17.80
  -4   9   2   74.19   23.30
  -9  -4   2   79.09   25.00
   4  -9   2   20.10   20.70
  -4   9   2   39.50   17.70
   9   4  -2   76.79   24.30
   9   4  -2   73.39   23.20
  -9  -4  -2  104.59   24.60
   4  -9  -2   60.89   22.20
  -9  -4  -2   92.99   25.40
  -4   9  -2   65.99   22.10
   4  -9  -2   42.10   31.10
  -9  -5   2   -2.20   18.30
  -5   9   2   -2.20   14.20
   5  -9   2   55.59   24.20
  -9  -5   2   22.10   16.10
   9   5   2   40.40   21.10
   9   5   2  -18.40   17.30
   5  -9   2   26.30   20.10
   9   5  -2   41.00   21.90
   5  -9  -2  -18.20   15.30
  -9  -5  -2   -0.80   18.30
   5  -9  -2    1.70   19.70
  -9  -5  -2   13.90   18.80
   9   5  -2  -10.10   19.30
  -5   9  -2  -11.30   16.30
  -9  -6   2  438.16   55.49
  -9  -6   2  443.36   47.30
   6  -9   2  446.76   45.20
  -6   9   2  422.06   43.70
   9   6   2  390.16   49.00
   6  -9   2  503.45   50.59
   9   6   2  474.95   48.00
   9   6  -2  457.35   49.50
  -9  -6  -2  402.86   45.80
   6  -9  -2  466.85   48.30
  -9  -6  -2  504.65   49.30
  -6   9  -2  484.55   47.80
   9   6  -2  416.06   46.80
  -6   9  -2  535.65   48.80
   6  -9  -2  464.15   48.10
   9   7   2    9.80   20.50
  -7   9   2    1.70   16.60
   9   7   2    7.90   17.90
   7  -9   2    4.10   20.30
  -9  -7   2   15.00   19.80
  -7   9   2   25.40   16.30
  -9  -7   2   30.40   21.70
   7  -9   2   15.20   22.00
   9   7  -2    5.90   19.90
  -9  -7  -2   21.70   20.70
   7  -9  -2   34.30   24.60
   7  -9  -2    0.70   19.40
   9   7  -2   14.60   22.60
  -7   9  -2   20.60   20.90
  -9  -7  -2    4.00   20.70
  -7   9  -2    5.60   19.50
   9   8   2  141.99   45.90
   8  -9   2  172.58   33.40
  -9  -8   2  148.59   33.90
  -9  -8   2  126.69   28.70
   9   8   2  115.69   28.60
   8  -9   2  135.09   31.00
  -8   9   2  158.78   30.40
  -8   9   2  146.79   31.20
   9   8  -2  104.99   29.30
  -8   9  -2  101.19   25.90
  -9  -8  -2  141.89   32.40
   8  -9  -2  115.79   30.40
  -9  -8  -2  103.89   27.80
   8  -9  -2   64.09   23.60
   9   8  -2  160.18   32.80
  -8   9  -2  103.09   26.00
   9   9   2    1.30   19.80
   9  -9   2   10.60   27.60
   9  -9   2   12.40   23.10
  -9   9   2   -3.90   18.30
   9   9   2  -28.00   17.90
  -9  -9   2   21.10   23.80
  -9   9   2   -7.70   14.70
  -9  -9   2  -31.80   19.20
   9   9  -2    3.70   22.50
   9  -9  -2  -20.90   22.10
  -9   9  -2   -1.30   18.40
   9   9  -2   -9.60   22.00
  -9  -9  -2  -11.60   23.80
   9  -9  -2    1.90   21.80
  -9  -9  -2    4.10   22.70
  -9   9  -2   -9.70   18.30
  10  -9   2   44.70   28.90
  10  -9   2   49.90   28.70
  -9 -10   2   30.30   25.10
 -10   9   2   50.29   19.90
   9  10   2   77.79   27.70
  -9 -10   2   13.80   23.90
   9  10   2   90.99   28.40
 -10   9   2   73.29   26.70
 -10   9  -2   33.70   23.10
  10  -9  -2   56.59   31.30
  -9 -10  -2  109.79   41.20
  -9 -10  -2   23.10   25.70
   9  10  -2   51.99   27.90
  10  -9  -2   69.59   29.70
 -10   9  -2   57.99   27.20
   9  10  -2   64.29   29.00
  -8 -10   2   55.99   27.40
  10  -8   2    7.10   23.70
   8  10   2   40.50   22.90
 -10   8   2   10.90   16.70
 -10   8   2   37.70   23.70
   8  10   2   12.50   22.00
  -8 -10   2   58.69   25.50
  10  -8   2   43.30   25.00
  -8 -10  -2    4.80   23.50
  -8 -10  -2   48.70   27.20
  10  -8  -2   45.20   24.40
 -10   8  -2   32.30   21.70
   8  10  -2   50.89   27.70
   8  10  -2   44.90   24.30
  10  -8  -2   40.50   27.80
 -10   8  -2   20.00   20.60
 -10   7   2  146.39   29.50
   7  10   2  104.89   29.80
   7  10   2  111.29   27.60
 -10   7   2  116.89   25.10
  10  -7   2   89.39   28.90
  -7 -10   2  138.99   36.40
  10  -7   2   89.69   28.90
  -7 -10   2  116.79   28.40
   7  10  -2  115.29   28.60
  10  -7  -2  139.39   32.30
  -7 -10  -2  133.19   32.50
  -7 -10  -2  132.39   31.00
 -10   7  -2  177.38   31.10
  10  -7  -2  104.99   28.70
   7  10  -2  165.58   32.40
 -10   7  -2  119.09   27.50
  10  -6   2   55.69   22.00
   6  10   2   27.30   22.70
 -10   6   2   37.10   24.40
  10  -6   2   -8.80   20.10
  -6 -10   2   39.30   23.30
   6  10   2   56.59   28.80
  -6 -10   2    2.30   20.10
  -6 -10  -2    7.90   19.60
   6  10  -2   12.20   22.20
  10  -6  -2   14.30   21.70
  10  -6  -2   25.80   24.10
 -10   6  -2   17.30   21.80
 -10   6  -2   24.70   18.10
   6  10  -2   20.40   22.20
  -6 -10  -2   62.89   26.10
  -5 -10   2  228.18   34.50
  10  -5   2  262.47   36.30
  10  -5   2  236.18   35.10
 -10   5   2  205.98   33.40
 -10   5   2  186.28   28.70
  -5 -10   2  202.08   32.70
   5  10   2  209.58   32.90
   5  10   2  216.48   34.90
   5  10  -2  252.87   36.80
 -10   5  -2  227.48   33.50
 -10   5  -2  283.37   37.50
   5  10  -2  216.08   36.30
  -5 -10  -2  232.78   35.70
  -5 -10  -2  185.18   34.90
  10  -5  -2  212.18   33.00
  10  -5  -2  272.57   38.50
  -4 -10   2  352.06   41.70
  10  -4   2  239.28   34.10
 -10   4   2  222.88   30.30
   4  10   2  290.07   37.50
   4  10   2  212.88   32.40
 -10   4   2  303.07   36.60
  -4 -10   2  170.68   31.80
  10  -4   2  220.48   32.80
  10  -4  -2  350.76   42.70
  -4 -10  -2  254.57   36.00
 -10   4  -2  336.27   42.20
 -10   4  -2  290.27   37.20
   4  10  -2  290.37   37.90
  10  -4  -2  192.98   30.70
   4  10  -2  224.68   34.60
  -4 -10  -2  220.88   34.70
  10  -3   2   26.80   21.70
   3  10   2   42.80   19.70
 -10   3   2   55.69   22.60
  10  -3   2   58.89   27.10
   3  10   2   65.69   22.60
 -10   3   2   48.10   17.80
  -3 -10   2   77.19   23.30
  -3 -10   2   18.40   20.30
  10  -3  -2   42.40   22.10
  -3 -10  -2   46.20   23.00
 -10   3  -2   25.60   18.50
   3  10  -2    1.70   19.90
   3  10  -2   39.30   21.10
  -3 -10  -2   24.70   20.70
 -10   3  -2   60.99   22.90
  10  -3  -2   22.50   22.00
 -10   2   2  574.54   48.00
  -2 -10   2  489.95   46.40
 -10   2   2  485.35   44.70
   2  10   2  512.45   45.70
   2  10   2  445.86   45.00
  10  -2   2  522.95   48.00
  -2 -10   2  600.44   66.19
  10  -2   2  414.86   50.09
  -2 -10  -2  432.26   47.60
 -10   2  -2  511.85   46.60
  10  -2  -2  582.24   52.29
  10  -2  -2  463.55   46.40
   2  10  -2  541.05   48.00
 -10   2  -2  464.35   44.50
  -2 -10  -2  448.66   45.50
   2  10  -2  436.86   47.10
  10  -1   2  189.98   30.20
  -1 -10   2  232.68   33.20
  10  -1   2  228.78   31.80
 -10   1   2  190.48   26.70
   1  10   2  309.67   37.10
   1  10   2  246.78   34.40
 -10   1   2  225.88   32.30
  -1 -10   2  217.78   43.30
  -1 -10  -2  191.48   30.90
   1  10  -2  260.77   35.00
 -10   1  -2  254.27   34.10
   1  10  -2  242.38   34.60
 -10   1  -2  247.48   33.40
  -1 -10  -2  211.48   33.90
  10  -1  -2  201.18   31.80
  10  -1  -2  181.58   31.20
   0  10   2   15.50   16.50
 -10   0   2   -9.80   18.50
   0  10   2  -27.70   15.80
  10   0   2   16.30   18.70
  10   0   2    4.90   18.20
 -10   0   2    9.50   16.20
   0 -10   2   -2.90   18.90
 -10   0  -2   14.00   18.10
 -10   0  -2    8.50   17.90
  10   0  -2  -16.40   17.10
   0  10  -2  -25.30   15.00
  10   0  -2    5.80   18.70
   0 -10  -2   20.50   22.20
   0 -10  -2   -8.30   18.30
   0  10  -2  -20.20   17.30
  -1  10   2  227.18   31.20
 -10  -1   2  270.77   35.60
  10   1   2  235.98   32.40
 -10  -1   2  302.27   35.90
  -1  10   2  255.57   34.10
  10   1   2  197.78   31.00
   1 -10   2  220.78   32.70
  -1  10  -2  214.88   32.80
 -10  -1  -2  277.87   35.40
  10   1  -2  249.97   33.00
  -1  10  -2  217.58   32.20
   1 -10  -2  225.08   34.00
 -10  -1  -2  299.97   37.10
  10   1  -2  221.88   32.90
  10   2   2  352.76   42.40
   2 -10   2  372.16   43.80
  10   2   2  413.06   43.70
  -2  10   2  427.46   42.50
  -2  10   2  407.46   43.60
 -10  -2   2  430.36   45.60
 -10  -2   2  398.46   40.70
   2 -10   2  463.45   56.09
 -10  -2  -2  373.76   43.40
  10   2  -2  390.06   43.80
 -10  -2  -2  390.76   43.90
  -2  10  -2  441.96   45.70
  10   2  -2  460.45   44.70
   2 -10  -2  411.86   43.50
  -2  10  -2  552.64   47.20
  -3  10   2   29.10   17.30
   3 -10   2   57.29   22.60
  -3  10   2   40.30   21.10
  10   3   2   15.00   19.40
  10   3   2   53.09   23.00
 -10  -3   2   42.20   17.80
   3 -10   2   64.19   22.80
 -10  -3   2   46.50   23.60
  10   3  -2   62.39   22.90
 -10  -3  -2   69.89   23.80
  10   3  -2   75.69   25.60
   3 -10  -2   50.39   23.30
 -10  -3  -2   37.90   20.80
   3 -10  -2   83.59   23.40
  -3  10  -2   49.90   22.80
  -3  10  -2   64.09   22.40
 -10  -4   2  239.48   34.10
 -10  -4   2  131.89   30.60
  -4  10   2  204.48   30.30
   4 -10   2  207.08   32.30
  10   4   2  197.68   36.20
   4 -10   2  209.18   31.90
  -4  10   2  268.97   37.00
  10   4   2  220.78   31.70
  10   4  -2  264.87   36.70
 -10  -4  -2  213.38   33.10
   4 -10  -2  183.18   31.50
  -4  10  -2  235.48   33.60
  10   4  -2  156.08   31.10
  -4  10  -2  266.07   36.00
 -10  -4  -2  205.38   33.90
   4 -10  -2  146.79   29.00
   5 -10   2  364.46   45.00
  -5  10   2  216.18   30.30
  -5  10   2  366.26   43.60
 -10  -5   2  316.57   39.30
  10   5   2  232.78   35.60
 -10  -5   2  288.77   38.50
  10   5   2  285.37   48.40
   5 -10   2  357.16   44.10
   5 -10  -2  242.18   36.40
  10   5  -2  362.56   43.90
  10   5  -2  281.47   38.60
  -5  10  -2  385.66   44.20
 -10  -5  -2  275.97   37.30
   5 -10  -2  360.86   44.00
 -10  -5  -2  298.17   40.50
  -6  10   2   30.90   20.40
   6 -10   2   82.09   24.50
  10   6   2   39.70   21.40
   6 -10   2   11.80   20.60
  10   6   2   18.70   23.70
 -10  -6   2   75.69   25.70
 -10  -6   2   31.10   23.00
 -10  -6  -2   33.80   21.50
  10   6  -2   18.20   20.50
  10   6  -2   49.90   25.30
   6 -10  -2   77.39   26.20
 -10  -6  -2   23.70   24.20
  -6  10  -2   64.59   24.90
   6 -10  -2   48.40   25.00
 -10  -7   2  146.29   29.80
  10   7   2  156.78   30.00
 -10  -7   2   95.79   50.29
   7 -10   2  139.59   31.00
  -7  10   2  141.89   27.60
   7 -10   2  104.59   30.00
  10   7   2  111.99   40.50
  10   7  -2   89.49   27.50
  -7  10  -2  110.79   25.10
 -10  -7  -2  158.48   31.70
 -10  -7  -2  119.29   31.40
  -7  10  -2  140.89   29.30
   7 -10  -2  163.68   33.10
   7 -10  -2  133.79   30.90
  10   7  -2  153.58   33.10
  -8  10   2   16.30   16.80
  10   8   2   32.60   23.00
 -10  -8   2  -27.40   19.30
   8 -10   2   10.50   25.30
  -8  10   2   29.10   21.20
  10   8   2   86.09   26.50
   8 -10   2   -8.10   21.90
 -10  -8   2   40.40   24.80
  -8  10  -2   42.10   23.60
   8 -10  -2   58.79   27.20
   8 -10  -2   15.40   26.20
  -8  10  -2   24.00   20.20
  10   8  -2   80.69   27.10
 -10  -8  -2    8.50   25.20
 -10  -8  -2   50.89   26.00
  10   8  -2   31.40   25.50
 -10  -9   2   31.80   25.80
  -9  10   2   39.20   19.80
   9 -10   2   48.40   27.70
  10   9   2   51.39   26.40
   9 -10   2   15.50   27.30
 -10  -9   2   30.70   24.30
  -9  10   2    7.50   21.00
  10   9   2   52.69   25.90
   9 -10  -2   30.90   27.60
  -9  10  -2   48.80   26.50
  10   9  -2   88.79   31.40
   9 -10  -2   61.29   31.20
 -10  -9  -2   -4.90   25.10
  10   9  -2   23.60   27.30
  -9  10  -2   47.00   25.30
 -10  -9  -2   45.50   41.80
  10 -10   2   30.10   28.10
 -10  10   2   35.30   24.10
  10  10   2   90.69   29.70
  10 -10   2   56.79   28.00
  10  10   2   26.30   23.80
 -10 -10   2  105.69   31.80
 -10  10   2    5.90   17.60
 -10 -10   2   81.69   27.70
 -10 -10  -2  -25.10   27.10
 -10  10  -2   46.00   22.60
  10 -10  -2   45.00   27.80
  10  10  -2   56.29   36.70
 -10  10  -2   18.80   37.00
  10 -10  -2   69.39   33.80
  10  10  -2   44.80   27.20
 -10 -10  -2   79.49   31.30
 -11  10   2   57.99   25.60
  10  11   2   49.99   30.20
  10  11   2   75.09   28.70
  11 -10   2   54.49   29.90
 -10 -11   2  137.39   33.50
 -10 -11   2   45.30   29.90
 -11  10   2   43.30   22.30
  11 -10   2   12.90   25.70
 -11  10  -2   51.49   23.80
 -10 -11  -2  101.69   34.20
  10  11  -2   26.30   28.30
  11 -10  -2   27.20   28.30
  11 -10  -2   43.70   35.50
 -10 -11  -2   84.89   35.40
 -11  10  -2   97.69   28.60
  10  11  -2   48.40   29.50
  11  -9   2   14.70   24.50
   9  11   2   16.30   23.90
  -9 -11   2   22.90   27.10
  -9 -11   2   22.40   25.00
 -11   9   2   26.60   24.60
  11  -9   2   70.99   29.60
   9  11   2   38.20   26.00
 -11   9   2   64.19   22.20
  11  -9  -2   -2.50   31.30
  -9 -11  -2    6.80   30.30
 -11   9  -2   22.30   20.90
   9  11  -2   -9.00   24.40
   9  11  -2   67.49   33.50
  -9 -11  -2   27.60   26.80
  11  -9  -2   57.19   29.30
  11  -8   2   68.59   29.90
 -11   8   2   44.00   24.20
  11  -8   2   14.10   25.20
   8  11   2   64.19   28.00
 -11   8   2   65.09   22.90
  -8 -11   2   58.59   26.80
   8  11   2   36.10   24.10
  -8 -11   2   36.70   27.40
  -8 -11  -2   69.09   33.10
  -8 -11  -2   49.70   28.60
   8  11  -2   48.20   28.80
   8  11  -2   30.40   26.60
  11  -8  -2   42.40   27.80
 -11   8  -2   45.80   23.70
 -11   8  -2   31.00   23.80
  11  -8  -2   61.19   31.40
   7  11   2  180.38   33.30
  11  -7   2  180.88   34.70
 -11   7   2  203.08   33.70
 -11   7   2  144.29   26.90
  11  -7   2  172.08   34.80
   7  11   2  234.08   37.30
  -7 -11   2  222.88   37.30
  -7 -11   2  185.18   36.10
   7  11  -2  190.58   36.60
 -11   7  -2  213.98   36.50
 -11   7  -2  149.19   30.20
  11  -7  -2   92.79   30.50
  -7 -11  -2  129.89   32.90
  11  -7  -2  199.58   52.19
   7  11  -2  158.78   34.90
  -7 -11  -2  167.18   40.00
   6  11   2   44.40   21.70
 -11   6   2   19.30   21.00
  11  -6   2   43.40   24.40
  -6 -11   2    5.90   22.40
   6  11   2   34.30   21.50
 -11   6   2   30.00   18.10
  11  -6   2   19.20   35.70
  -6 -11  -2   40.30   27.70
  -6 -11  -2   57.19   27.00
   6  11  -2   46.40   24.50
  11  -6  -2   11.10   22.00
  11  -6  -2   51.99   27.80
 -11   6  -2   18.70   20.60
 -11   6  -2   14.40   21.30
   6  11  -2   42.40   25.50
   5  11   2   22.20   20.00
  11  -5   2   40.60   24.00
  -5 -11   2   23.20   21.30
   5  11   2   38.90   25.80
 -11   5   2   25.50   22.50
 -11   5   2   46.90   20.00
  11  -5   2   32.80   24.10
  -5 -11   2   22.50   23.40
   5  11  -2   42.20   21.30
 -11   5  -2   30.50   20.50
  -5 -11  -2   48.70   22.70
 -11   5  -2   15.40   20.20
   5  11  -2   42.50   25.20
  11  -5  -2   39.00   25.50
  -5 -11  -2    5.80   24.70
  11  -5  -2   15.10   21.20
  11  -4   2   96.19   26.90
 -11   4   2   65.09   28.30
   4  11   2   80.09   39.60
  -4 -11   2   47.20   22.70
  11  -4   2  101.89   25.80
  -4 -11   2   38.70   23.60
 -11   4   2   76.49   25.70
   4  11   2  105.49   39.40
  -4 -11  -2   62.59   26.50
   4  11  -2   65.69   25.10
  -4 -11  -2   58.49   25.80
   4  11  -2   65.49   25.60
 -11   4  -2   82.19   22.90
 -11   4  -2   53.79   25.20
  11  -4  -2   51.29   22.60
  11  -4  -2   69.89   27.20
  11  -3   2  484.15   51.89
  -3 -11   2  473.25   49.90
   3  11   2  407.46   46.70
   3  11   2  416.26   45.30
  11  -3   2  458.55   47.60
 -11   3   2  537.85   49.80
  -3 -11   2  510.45   49.40
  11  -3  -2  450.65   47.10
  -3 -11  -2  498.65   50.29
   3  11  -2  449.46   50.99
   3  11  -2  554.84   53.69
  -3 -11  -2  503.25   51.69
 -11   3  -2  451.85   47.90
 -11   3  -2  446.86   48.50
  11  -3  -2  415.16   49.40
 -11   2   2   56.59   20.50
  -2 -11   2   42.40   23.30
  11  -2   2   72.39   26.00
 -11   2   2   33.20   21.70
   2  11   2   93.19   27.30
   2  11   2   43.00   19.50
  -2 -11   2   76.59   24.20
  11  -2   2   79.99   25.30
   2  11  -2   51.89   25.10
 -11   2  -2  118.99   28.60
  11  -2  -2   74.49   24.80
  -2 -11  -2   65.99   25.80
   2  11  -2   62.69   25.30
  11  -2  -2   71.29   27.90
 -11   2  -2   75.49   25.30
  -2 -11  -2   21.10   22.50
  -1 -11   2   67.79   23.80
 -11   1   2   32.10   17.70
   1  11   2   72.89   25.80
  11  -1   2   36.60   23.10
  11  -1   2   63.89   23.00
 -11   1   2   82.69   24.70
   1  11   2   67.99   20.90
  -1 -11   2  100.89   26.00
 -11   1  -2   50.69   23.30
  11  -1  -2   44.30   21.10
  -1 -11  -2   71.29   26.50
   1  11  -2   41.70   24.00
 -11   1  -2   74.89   24.80
  -1 -11  -2   62.59   25.20
   1  11  -2   66.09   24.50
  11  -1  -2   51.19   24.70
 -11   0   2  118.29   27.50
  11   0   2  107.19   26.70
  11   0   2  107.29   27.40
   0  11   2  126.39   29.30
   0 -11   2  114.39   27.00
 -11   0   2   92.39   23.40
   0  11   2   78.49   23.20
 -11   0  -2  135.19   28.40
  11   0  -2  107.89   28.20
   0 -11  -2   84.39   25.60
  11   0  -2  101.69   26.60
   0  11  -2  101.99   27.30
   0 -11  -2   80.69   26.20
 -11   0  -2   98.09   26.90
   0  11  -2   91.09   27.20
   1 -11   2   86.99   25.50
  -1  11   2   84.49   26.80
  11   1   2   71.49   24.10
   1 -11   2   88.79   25.30
 -11  -1   2   68.19   25.10
 -11  -1   2   42.70   22.10
  11   1   2   88.89   24.40
  -1  11   2   72.59   21.80
  -1  11  -2   25.80   24.30
  11   1  -2  106.19   28.90
 -11  -1  -2  107.49   27.10
  -1  11  -2   92.29   25.70
 -11  -1  -2   49.99   24.00
   1 -11  -2   93.39   25.70
  11   1  -2   92.59   25.40
 -11  -2   2   84.29   26.50
   2 -11   2  110.99   28.00
  11   2   2   55.49   23.70
  -2  11   2   73.79   21.80
   2 -11   2   84.39   25.00
  -2  11   2   76.19   26.10
  11   2   2   86.89   25.70
 -11  -2   2   59.29   32.00
 -11  -2  -2   72.39   24.70
  11   2  -2   27.70   22.00
  11   2  -2   41.90   23.70
  -2  11  -2   81.69   26.40
  -2  11  -2  101.49   29.00
 -11  -2  -2   78.49   26.10
   2 -11  -2   98.89   27.00
   2 -11  -2   36.80   23.90
  11   3   2  390.26   44.80
   3 -11   2  372.86   45.00
  -3  11   2  392.36   44.40
   3 -11   2  396.06   46.00
  11   3   2  262.67   35.80
  -3  11   2  412.06   42.50
 -11  -3   2  355.86   40.90
 -11  -3   2  383.96   44.80
 -11  -3  -2  434.96   47.60
 -11  -3  -2  309.77   40.30
   3 -11  -2  231.68   35.80
  11   3  -2  392.86   47.70
   3 -11  -2  285.67   38.00
  11   3  -2  395.96   45.70
  -3  11  -2  373.46   46.00
  -3  11  -2  309.07   41.80
 -11  -4   2   64.99   18.60
  11   4   2   96.99   26.40
  11   4   2   75.39   26.00
 -11  -4   2  109.79   29.10
  -4  11   2   82.49   25.60
   4 -11   2  108.29   28.60
   4 -11   2   85.49   26.70
  -4  11  -2   87.19   26.40
  11   4  -2  106.49   27.80
  -4  11  -2  114.19   28.00
 -11  -4  -2  121.49   28.90
   4 -11  -2  100.59   29.50
 -11  -4  -2  124.19   28.50
  11   4  -2   80.59   25.60
   4 -11  -2   42.20   24.70
  -5  11   2   16.70   22.10
 -11  -5   2   37.40   18.60
   5 -11   2   46.20   26.40
  11   5   2   27.80   37.70
  -5  11   2   61.39   29.90
 -11  -5   2   57.49   38.70
   5 -11   2   31.60   24.70
  11   5   2   55.09   23.90
  -5  11  -2   31.20   22.90
  -5  11  -2   99.79   26.40
 -11  -5  -2   58.29   24.90
   5 -11  -2   94.49   28.70
  11   5  -2   81.19   26.70
  11   5  -2   32.20   22.70
   5 -11  -2   23.80   20.80
 -11  -5  -2   45.00   25.10
   6 -11   2   96.79   27.70
 -11  -6   2   29.30   17.70
  -6  11   2   70.79   22.00
  -6  11   2   26.20   21.30
  11   6   2   22.30   21.50
  11   6   2   59.79   23.90
   6 -11   2   55.19   40.20
 -11  -6   2   58.79   26.10
   6 -11  -2   83.89   27.60
  11   6  -2   44.70   26.70
  -6  11  -2   39.40   23.10
  11   6  -2   20.60   25.70
   6 -11  -2   33.60   26.50
 -11  -6  -2   53.29   26.10
 -11  -6  -2   50.29   23.80
   7 -11   2  158.18   33.50
 -11  -7   2  171.48   34.80
  11   7   2  198.78   34.80
  -7  11   2  200.88   31.80
 -11  -7   2  202.88   37.00
   7 -11   2  174.58   34.10
  11   7   2  235.78   37.00
 -11  -7  -2  231.78   38.90
  11   7  -2  180.48   34.60
  -7  11  -2  255.57   38.70
 -11  -7  -2  172.58   36.00
  11   7  -2  185.58   35.50
   7 -11  -2  151.98   34.20
   8 -11   2    7.50   25.70
 -11  -8   2    2.40   23.30
  -8  11   2   28.80   18.60
 -11  -8   2    9.60   25.90
   8 -11   2    5.10   24.60
  11   8   2   12.70   25.30
  11   8   2  104.59   28.20
  11   8  -2   53.09   36.50
   8 -11  -2   28.10   26.90
  -8  11  -2   32.00   24.00
  11   8  -2   43.50   27.40
 -11  -8  -2   29.10   25.10
 -11  -8  -2   39.30   38.10
  -8  11  -2   25.10   22.00
   8 -11  -2   63.59   31.80
 -11  -9   2   23.30   26.30
  -9  11   2   15.00   23.00
   9 -11   2   94.69   29.20
  11   9   2   58.19   28.00
   9 -11   2   75.79   32.50
  11   9   2   66.59   28.40
 -11  -9   2   44.70   25.70
  -9  11   2   45.90   20.90
  -9  11  -2  125.69   47.10
   9 -11  -2   73.49   35.20
  11   9  -2   64.59   31.30
 -11  -9  -2   23.20   28.30
 -11  -9  -2   75.39   34.50
  -9  11  -2   62.99   25.20
   9 -11  -2    3.60   25.10
  11   9  -2   50.49   28.50
  10 -11   2   84.59   29.10
 -10  11   2   49.40   22.20
  10 -11   2   38.70   31.40
  11  10   2   35.80   28.40
  11  10   2   68.49   28.60
 -10  11   2   75.49   27.00
 -11 -10   2   65.29   29.70
 -11 -10   2   61.69   27.80
  10 -11  -2   29.60   31.90
  11  10  -2   19.40   27.40
 -10  11  -2  103.29   29.80
  10 -11  -2   28.00   26.60
 -10  11  -2   36.80   23.50
  11  10  -2   16.80   28.30
 -11 -10  -2   54.69   34.20
 -11 -10  -2   37.60   30.00
 -11  11   2   25.40   23.50
 -11  11   2   13.70   21.50
 -11 -11   2   40.20   26.60
  11 -11   2   43.00   29.20
  11  11   2   14.40   26.00
  11  11   2  -11.10   25.30
 -11 -11   2  -19.30   25.60
  11 -11   2   14.10   30.40
 -11  11  -2    0.20   24.70
  11 -11  -2   26.00   29.20
  11 -11  -2   29.60   33.50
 -11 -11  -2   20.70   29.70
  11  11  -2  -18.40   25.60
  11  11  -2   -6.10   28.90
 -11 -11  -2    8.80   31.20
 -11  11  -2    7.70   23.90
  11  12   2   91.19   30.10
  12 -11   2   70.69   32.80
  12 -11   2   44.10   36.50
 -12  11   2   28.80   22.70
 -12  11   2   38.60   23.40
 -11 -12   2   33.30   32.10
 -11 -12   2   62.19   26.80
  11  12   2   32.90   32.70
  12 -11  -2   -5.40   27.70
 -12  11  -2   27.40   25.90
 -11 -12  -2   96.29   31.30
 -11 -12  -2   76.29   35.60
  11  12  -2   57.49   34.80
 -12  11  -2   42.70   27.50
  11  12  -2   71.69   36.10
  12 -11  -2    7.20   34.20
 -10 -12   2  -18.40   24.00
  12 -10   2   54.89   31.00
  10  12   2   11.20   25.30
 -10 -12   2   25.00   24.90
  10  12   2   33.20   25.60
 -12  10   2  -17.20   18.70
 -12  10   2   11.20   22.00
  12 -10   2   22.10   31.70
 -12  10  -2   17.00   25.70
  12 -10  -2   -4.30   29.60
  10  12  -2    1.40   28.90
 -10 -12  -2   40.40   29.70
 -12  10  -2   -6.70   21.50
  12 -10  -2  -21.10   30.00
 -10 -12  -2   15.00   29.20
  10  12  -2   47.80   29.80
  12  -9   2   28.20   29.80
   9  12   2   18.00   25.60
  12  -9   2  -10.90   25.10
 -12   9   2   51.19   24.30
 -12   9   2   19.50   20.50
  -9 -12   2   24.20   24.70
   9  12   2   32.40   24.70
  -9 -12   2   15.70   28.50
   9  12  -2   25.00   26.30
 -12   9  -2   49.20   27.50
   9  12  -2   15.80   26.00
 -12   9  -2   26.40   24.60
  12  -9  -2    9.20   28.20
  12  -9  -2   22.80   33.50
  -9 -12  -2   12.10   27.90
  -9 -12  -2   13.70   29.50
  12  -8   2   56.29   29.30
 -12   8   2   62.59   23.40
 -12   8   2   41.60   26.30
  12  -8   2   64.79   31.20
   8  12   2   59.39   28.60
   8  12   2  104.49   30.70
  -8 -12   2   85.39   32.30
  -8 -12   2   79.69   31.80
  -8 -12  -2  100.09   32.20
 -12   8  -2   74.89   26.70
  -8 -12  -2  111.69   37.80
  12  -8  -2   88.79   36.90
   8  12  -2  107.09   32.00
 -12   8  -2  123.09   34.20
  12  -8  -2   95.39   32.20
   8  12  -2  120.89   35.20
 -12   7   2   94.19   28.30
  -7 -12   2   78.39   27.70
   7  12   2   57.69   24.60
 -12   7   2   54.19   21.40
  12  -7   2   48.00   26.50
   7  12   2   65.79   27.60
  12  -7   2   64.99   29.60
  -7 -12   2   95.19   31.60
 -12   7  -2  130.39   33.80
  12  -7  -2   60.79   32.00
   7  12  -2   91.49   30.30
  12  -7  -2   86.39   29.40
 -12   7  -2   77.89   24.30
  -7 -12  -2  108.89   31.40
  -7 -12  -2   93.49   35.70
   7  12  -2  102.09   39.20
  -6 -12   2  177.78   36.10
   6  12   2  208.38   36.10
  12  -6   2  166.88   35.90
 -12   6   2  107.99   24.40
  -6 -12   2  125.49   32.90
   6  12   2  157.48   30.00
  12  -6   2  133.99   34.30
 -12   6   2  164.48   32.80
   6  12  -2  160.68   35.40
  12  -6  -2  130.19   34.40
  -6 -12  -2  179.68   40.60
   6  12  -2  170.38   36.50
  12  -6  -2  168.98   41.40
  -6 -12  -2  155.48   35.70
 -12   6  -2  161.68   34.70
 -12   6  -2  150.48   29.70
  12  -5   2   57.19   26.20
  12  -5   2   58.39   25.20
  -5 -12   2   38.30   25.90
 -12   5   2   34.50   23.20
  -5 -12   2   45.60   24.80
   5  12   2   56.79   24.30
   5  12   2   35.20   22.00
 -12   5   2   37.40   18.70
  -5 -12  -2    4.70   25.30
   5  12  -2   66.49   28.40
  12  -5  -2   62.19   28.80
 -12   5  -2   62.89   23.10
  -5 -12  -2   69.29   34.50
  12  -5  -2   25.90   29.90
 -12   5  -2   41.10   22.90
   5  12  -2   24.50   24.40
  -4 -12   2   -4.20   21.80
 -12   4   2   16.60   18.90
   4  12   2   20.60   21.60
  12  -4   2    3.70   19.20
  12  -4   2   28.70   25.70
 -12   4   2   22.80   19.60
   4  12   2    7.30   18.70
  -4 -12   2   34.20   29.80
  -4 -12  -2    4.00   24.30
 -12   4  -2   19.40   21.40
  -4 -12  -2   51.69   26.10
   4  12  -2  -22.60   19.10
  12  -4  -2   -2.40   20.70
 -12   4  -2    9.00   20.00
  12  -4  -2   34.20   27.30
   4  12  -2   16.50   22.30
  -3 -12   2  116.89   29.60
 -12   3   2   59.29   20.10
   3  12   2   55.89   22.30
  12  -3   2   75.79   27.50
 -12   3   2   76.69   24.90
   3  12   2   55.09   25.60
  -3 -12   2   81.99   32.70
 -12   3  -2   59.39   22.20
  12  -3  -2   92.49   28.80
  12  -3  -2   77.89   29.10
   3  12  -2   73.69   27.00
  -3 -12  -2   49.40   26.00
   3  12  -2   26.00   23.60
 -12   3  -2   86.49   25.70
  -3 -12  -2   76.19   27.70
   2  12   2   71.39   24.70
  12  -2   2   42.30   26.60
  -2 -12   2   55.69   24.50
 -12   2   2   76.99   25.60
   2  12   2   57.89   25.60
  -2 -12   2  114.89   30.70
  12  -2   2   43.50   23.90
 -12   2   2   36.90   19.30
   2  12  -2   59.39   26.00
  -2 -12  -2   66.19   26.60
 -12   2  -2   87.99   27.60
   2  12  -2   83.59   25.70
  12  -2  -2   53.79   23.70
  -2 -12  -2   41.70   25.60
  12  -2  -2   42.00   28.60
 -12   2  -2   88.09   26.30
  -1 -12   2   63.99   26.20
  -1 -12   2   42.20   24.00
 -12   1   2   36.80   19.60
  12  -1   2   51.59   24.00
   1  12   2   71.79   28.00
 -12   1   2   53.49   41.20
  12  -1   2   56.09   28.00
   1  12   2   98.79   30.50
  12  -1  -2   59.59   26.90
   1  12  -2   79.49   25.90
 -12   1  -2   43.30   22.30
   1  12  -2   17.90   22.30
  12  -1  -2   26.10   22.70
  -1 -12  -2   63.89   24.50
 -12   1  -2   53.49   24.20
  -1 -12  -2   10.50   24.50
  12   0   2  225.78   36.80
  12   0   2  151.88   29.40
 -12   0   2  109.39   24.80
   0  12   2  152.18   34.20
   0  12   2  167.38   41.00
   0 -12   2  151.38   32.60
  12   0  -2   99.09   27.20
   0  12  -2  135.99   29.60
   0  12  -2  156.48   32.80
 -12   0  -2  144.89   31.20
   0 -12  -2  124.69   28.90
 -12   0  -2  132.49   30.00
  12   0  -2  153.88   32.50
   0 -12  -2  128.19   31.10
   1 -12   2   66.19   26.70
  -1  12   2   59.39   30.60
 -12  -1   2   35.50   17.50
  12   1   2   59.49   23.70
  12   1   2   49.99   25.90
   1 -12   2   74.29   25.90
  -1  12   2   46.30   25.40
   1 -12  -2   75.89   24.80
  -1  12  -2    3.70   21.00
  12   1  -2   46.30   26.00
 -12  -1  -2   65.79   26.10
  12   1  -2   32.90   21.40
  -1  12  -2   50.89   23.70
 -12  -1  -2   48.90   23.70
   2 -12   2   61.59   26.50
   2 -12   2   30.30   25.20
 -12  -2   2   29.40   15.80
  -2  12   2   11.70   21.20
  12   2   2  -23.10   36.70
  -2  12   2   52.09   24.60
  12   2   2   28.20   22.60
   2 -12  -2   53.69   24.10
 -12  -2  -2   76.19   25.70
  12   2  -2   48.80   25.10
  12   2  -2   29.40   22.80
  -2  12  -2   26.80   20.80
  -2  12  -2   62.39   24.20
   2 -12  -2   10.80   22.60
 -12  -2  -2   43.10   25.10
 -12  -3   2   30.00   15.90
  -3  12   2   63.99   27.20
  -3  12   2   59.39   21.40
 -12  -3   2   83.29   29.10
   3 -12   2   39.90   24.60
  12   3   2   33.60   28.30
   3 -12   2   63.09   27.90
  12   3   2   69.09   22.50
 -12  -3  -2   57.09   27.00
  -3  12  -2   91.19   27.90
   3 -12  -2   72.49   28.00
  -3  12  -2   83.79   26.50
  12   3  -2  109.39   29.20
 -12  -3  -2   91.09   26.50
   3 -12  -2   82.99   25.60
  12   3  -2   58.09   28.50
  12   4   2   25.40   23.10
  -4  12   2   30.00   19.60
  -4  12   2    8.80   20.30
   4 -12   2    4.60   21.30
  12   4   2   38.30   23.60
 -12  -4   2    3.30   17.60
 -12  -4   2    3.40   21.10
 -12  -4  -2   45.00   23.40
  -4  12  -2   35.40   23.00
   4 -12  -2   22.30   25.20
   4 -12  -2   -8.60   24.60
  -4  12  -2   25.80   22.50
  12   4  -2   23.80   24.00
  12   4  -2  -19.60   22.40
 -12  -4  -2   46.70   24.30
 -12  -5   2  129.89   32.60
  -5  12   2    4.50   20.80
   5 -12   2   27.30   24.30
  12   5   2   73.69   26.60
  -5  12   2   28.90   18.30
 -12  -5   2   43.70   20.60
  12   5   2   23.80   24.10
  -5  12  -2   67.29   24.70
 -12  -5  -2   93.49   28.90
  12   5  -2   21.00   23.80
 -12  -5  -2   54.39   26.30
  -5  12  -2   53.39   26.90
   5 -12  -2   35.50   25.80
  12   5  -2   40.30   26.70
  -6  12   2  164.38   29.30
  12   6   2  161.08   33.90
 -12  -6   2  126.59   26.30
  12   6   2  202.28   36.00
  -6  12   2  150.78   33.80
 -12  -6   2  170.78   33.60
   6 -12   2  140.79   33.80
   6 -12   2  194.88   36.80
  12   6  -2  141.29   36.00
   6 -12  -2  150.38   33.10
   6 -12  -2  215.78   39.90
 -12  -6  -2  155.98   40.50
  12   6  -2  163.18   39.70
  -6  12  -2  209.98   37.40
 -12  -6  -2  223.78   39.40
  -6  12  -2  162.68   37.00
  12   7   2   79.39   27.30
  -7  12   2  124.99   32.40
   7 -12   2   86.49   31.90
 -12  -7   2   88.59   30.90
  -7  12   2   50.69   20.30
   7 -12   2   56.59   27.30
 -12  -7   2  105.59   31.60
  12   7   2   67.49   26.50
  12   7  -2  122.29   42.10
 -12  -7  -2   42.70   30.40
  -7  12  -2   58.59   26.30
   7 -12  -2   76.99   33.10
   7 -12  -2   42.70   28.50
  12   7  -2   89.69   30.70
 -12  -7  -2   79.09   28.80
 -12  -8   2  121.89   34.00
  12   8   2  147.49   36.40
  -8  12   2   91.89   25.10
   8 -12   2  131.59   34.30
  12   8   2   88.69   31.00
 -12  -8   2  103.49   33.50
   8 -12   2  107.79   33.80
  12   8  -2   58.39   28.40
  12   8  -2   96.99   32.70
 -12  -8  -2   98.79   33.60
 -12  -8  -2  203.48   39.40
   8 -12  -2  103.39   36.00
   8 -12  -2  110.79   31.70
  -8  12  -2  145.29   41.80
  12   9   2   -5.30   20.90
   9 -12   2  -18.30   25.80
   9 -12   2  -36.70   27.50
 -12  -9   2   14.10   22.70
 -12  -9   2   -5.80   24.70
  12   9   2   18.70   26.40
  -9  12   2   17.60   19.70
  -9  12  -2   -9.90   19.50
  12   9  -2    2.80   28.30
 -12  -9  -2   20.50   26.70
 -12  -9  -2   14.90   27.90
  12   9  -2   -0.40   23.10
   9 -12  -2   34.40   29.50
   9 -12  -2  -12.30   28.50
  -9  12  -2    4.80   22.10
  10 -12   2   14.20   27.20
  12  10   2   44.10   29.80
 -12 -10   2   -7.90   25.20
 -10  12   2   22.90   21.30
 -12 -10   2   24.50   26.90
  10 -12   2  -31.90   28.90
  12  10   2    3.50   25.90
  12  10  -2   28.40   28.90
 -10  12  -2   22.70   26.00
  12  10  -2   31.20   30.90
 -12 -10  -2   21.00   26.50
  10 -12  -2   22.20   29.20
  10 -12  -2  -27.50   26.90
 -12 -10  -2   24.10   30.50
 -10  12  -2   11.50   22.20
  11 -12   2   28.60   35.20
 -11  12   2   25.20   20.70
  11 -12   2    6.10   29.40
 -11  12   2   44.00   22.40
 -12 -11   2   40.60   28.30
 -12 -11   2   75.99   35.80
  12  11   2   48.10   30.20
  12  11   2   50.39   27.40
  11 -12  -2   56.59   31.80
  11 -12  -2   46.50   36.80
  12  11  -2    8.00   29.10
 -11  12  -2   24.80   24.70
  12  11  -2    3.80   31.20
 -11  12  -2   41.60   25.60
 -12 -11  -2   62.09   28.50
 -12 -11  -2   36.10   34.30
 -12 -12   2   26.00   28.30
 -12 -12   2   57.59   35.80
 -12  12   2   50.59   24.00
  12 -12   2  -35.00   24.90
  12  12   2   71.69   32.50
  12 -12   2   85.69   39.90
  12  12   2   46.30   31.80
 -12  12   2   43.70   23.90
 -12 -12  -2   -3.00   28.30
  12 -12  -2    5.30   32.20
 -12  12  -2   21.50   27.30
 -12 -12  -2   51.19   37.70
  12  12  -2  -21.10   28.70
  12  12  -2   45.00   35.90
 -12  12  -2    0.70   24.50
  12 -12  -2    8.40   33.00
 -13  12   2   -7.50   20.20
 -13  12   2  -19.20   19.00
 -12 -13   2  -41.80   23.80
  13 -12   2  -18.30   29.00
  12  13   2   25.30   29.00
  13 -12   2  -63.19   30.30
 -12 -13   2   -8.90   30.50
  12  13   2  -21.40   27.40
  13 -12  -2  -31.90   29.30
  12  13  -2    4.20   33.10
 -13  12  -2   12.20   26.20
 -12 -13  -2   24.30   36.40
  12  13  -2   35.70   34.50
  13 -12  -2  -18.20   33.50
 -12 -13  -2   -6.50   29.40
 -13  12  -2    3.70   25.70
  13 -11   2   21.20   34.70
  13 -11   2  -66.99   24.30
  11  13   2    2.60   26.10
 -13  11   2  -13.90   16.60
 -11 -13   2   -0.50   31.80
 -11 -13   2  -25.00   24.80
 -13  11   2  -14.50   19.70
  11  13   2    4.10   26.50
  11  13  -2  -40.00   41.60
  11  13  -2   23.80   33.40
 -11 -13  -2   18.90   30.30
  13 -11  -2   -9.80   30.70
 -13  11  -2   66.59   29.30
 -13  11  -2   61.29   31.80
 -11 -13  -2   42.40   36.30
  13 -11  -2   21.20   31.90
 -10 -13   2   47.40   30.30
  13 -10   2    7.60   27.70
 -13  10   2   17.70   21.90
  10  13   2   23.10   29.90
 -10 -13   2   26.20   31.40
 -13  10   2    7.50   19.60
  13 -10   2  -19.90   29.50
  10  13   2   22.40   25.80
 -13  10  -2   16.30   24.90
  10  13  -2   -8.70   29.00
  10  13  -2   14.40   28.60
 -10 -13  -2   26.50   34.50
  13 -10  -2  -15.20   31.50
  13 -10  -2  -63.69   23.90
 -10 -13  -2   47.00   28.90
 -13  10  -2   27.30   25.60
   9  13   2   51.49   28.90
  -9 -13   2   49.80   31.60
  13  -9   2   52.59   29.10
  -9 -13   2   54.99   30.00
   9  13   2   39.30   26.10
 -13   9   2   55.89   25.60
  13  -9   2  -23.20   28.80
 -13   9   2   27.30   22.20
   9  13  -2   53.09   32.90
  -9 -13  -2   66.89   33.00
 -13   9  -2   80.09   28.30
   9  13  -2   37.10   30.20
  13  -9  -2   47.50   30.70
  13  -9  -2  105.29   34.00
 -13   9  -2  109.19   32.80
  -9 -13  -2   45.60   28.80
 -13   8   2    0.60   23.40
  -8 -13   2   37.10   30.20
  -8 -13   2   29.90   29.30
  13  -8   2   40.90   32.70
   8  13   2   24.60   23.70
  13  -8   2   79.99   32.00
   8  13   2   19.50   28.60
 -13   8   2   13.10   20.60
  -8 -13  -2   64.39   34.80
   8  13  -2   25.40   29.70
 -13   8  -2   27.60   24.00
  13  -8  -2   47.60   33.80
  -8 -13  -2   48.10   34.20
   8  13  -2   41.10   30.40
 -13   8  -2   43.20   28.20
  13  -8  -2   70.39   30.90
   7  13   2   42.10   24.90
 -13   7   2   12.40   24.10
  13  -7   2   29.40   27.20
  -7 -13   2   60.39   27.30
  -7 -13   2   61.39   30.00
   7  13   2   50.99   27.80
  13  -7   2   77.99   28.50
 -13   7   2   32.80   20.70
 -13   7  -2   30.60   22.40
  -7 -13  -2   26.20   27.60
  13  -7  -2    3.70   31.20
  13  -7  -2   22.10   25.90
  -7 -13  -2   -6.10   28.90
   7  13  -2   41.40   28.60
 -13   7  -2   19.00   26.10
   7  13  -2   36.10   27.80
  13  -6   2   44.00   28.90
 -13   6   2   11.20   17.10
  -6 -13   2  -10.40   23.00
  13  -6   2   33.40   27.00
  -6 -13   2   -0.40   24.50
   6  13   2   33.60   25.40
   6  13   2   50.99   26.50
 -13   6   2   18.30   24.30
 -13   6  -2   68.19   32.70
  13  -6  -2   43.40   32.10
   6  13  -2   29.80   26.80
  -6 -13  -2   73.69   37.20
   6  13  -2    6.40   24.60
  -6 -13  -2   43.40   29.30
  13  -6  -2   17.20   25.20
 -13   6  -2   29.50   23.30
  13  -5   2   56.59   29.60
  -5 -13   2   89.59   29.40
  13  -5   2   19.90   24.30
   5  13   2   80.29   28.50
 -13   5   2   79.79   26.10
  -5 -13   2   50.09   25.80
   5  13   2   17.30   21.30
 -13   5   2   36.20   17.50
   5  13  -2   36.40   25.40
  13  -5  -2  -24.70   25.70
  -5 -13  -2   14.60   25.60
  13  -5  -2    4.90   23.50
   5  13  -2   30.50   31.50
 -13   5  -2   79.39   35.40
 -13   5  -2   40.90   23.80
  -5 -13  -2   24.80   29.80
 -13   4   2  122.49   25.80
  -4 -13   2  232.98   39.30
 -13   4   2  192.58   35.30
  -4 -13   2  181.98   35.60
  13  -4   2  136.99   33.50
  13  -4   2  139.29   34.20
   4  13   2  127.49   29.00
   4  13   2  158.78   35.10
  -4 -13  -2  134.89   34.80
 -13   4  -2  215.58   38.80
  -4 -13  -2  128.99   34.50
  13  -4  -2  126.19   35.00
  13  -4  -2  212.18   46.50
   4  13  -2  169.98   37.50
 -13   4  -2  121.29   27.80
   4  13  -2  187.78   38.00
  13  -3   2   29.70   26.80
   3  13   2   36.40   20.40
  -3 -13   2   13.30   24.70
  -3 -13   2   24.30   24.80
 -13   3   2    7.80   16.90
  13  -3   2   19.80   25.70
 -13   3   2   14.60   21.20
   3  13   2   20.70   24.80
  -3 -13  -2   -4.30   24.10
  13  -3  -2   -0.80   24.10
  13  -3  -2   -9.40   34.70
 -13   3  -2   22.40   21.70
   3  13  -2   21.90   24.30
  -3 -13  -2   26.40   26.70
   3  13  -2   19.40   23.80
 -13   3  -2  -23.70   19.50
  -2 -13   2   43.10   27.00
 -13   2   2   37.40   18.60
   2  13   2   80.39   27.50
   2  13   2   90.29   25.10
 -13   2   2   55.99   25.70
  13  -2   2   24.20   22.90
  13  -2   2   31.90   24.10
  -2 -13   2  106.29   30.20
  13  -2  -2   36.70   26.50
  13  -2  -2   25.00   32.60
   2  13  -2   99.89   31.80
 -13   2  -2   86.29   29.10
  -2 -13  -2   43.40   37.30
 -13   2  -2   42.30   25.60
  -2 -13  -2   76.79   30.70
   2  13  -2   87.29   28.30
   1  13   2   16.70   19.20
  -1 -13   2   39.90   25.00
  13  -1   2  -25.50   20.00
 -13   1   2  -25.20   18.10
   1  13   2  -15.30   17.90
 -13   1   2    0.40   16.10
  13  -1   2   35.50   23.60
 -13   1  -2    7.70   22.50
   1  13  -2   -8.20   23.90
  13  -1  -2  -16.30   21.60
   1  13  -2   53.99   25.20
 -13   1  -2  -14.20   21.40
  13  -1  -2   16.70   27.00
  -1 -13  -2   18.10   26.40
  13   0   2   90.89   29.10
 -13   0   2   69.39   25.70
   0  13   2   85.29   27.00
 -13   0   2   71.79   21.30
   0  13   2   83.79   25.80
   0 -13   2   93.49   27.10
  13   0   2   72.09   25.70
   0 -13  -2   57.29   27.30
 -13   0  -2   84.19   28.40
  13   0  -2   44.90   26.80
 -13   0  -2   91.49   28.60
  13   0  -2   49.00   25.80
   0  13  -2  104.29   29.70
   0  13  -2  135.49   34.00
  -1  13   2  -32.40   18.50
  13   1   2   29.80   23.80
 -13  -1   2    2.20   20.60
  -1  13   2  -11.20   16.30
 -13  -1   2   -8.90   13.90
   1 -13   2   -4.90   20.60
  13   1   2   26.50   24.40
   1 -13   2   -5.50   21.90
 -13  -1  -2   19.30   22.00
  -1  13  -2    2.00   20.30
 -13  -1  -2  -34.60   21.40
   1 -13  -2   40.60   25.70
  13   1  -2  -29.80   21.80
  -1  13  -2   -7.20   22.90
  13   1  -2   17.20   24.60
  13   2   2   55.59   27.30
  13   2   2   44.30   27.30
 -13  -2   2   47.30   19.80
 -13  -2   2   38.10   25.90
   2 -13   2   74.19   28.50
   2 -13   2   49.40   26.90
  -2  13   2   55.39   27.10
  -2  13   2   79.39   24.70
  -2  13  -2   77.09   27.50
   2 -13  -2   57.29   38.00
   2 -13  -2   95.99   31.10
  -2  13  -2   61.19   28.50
 -13  -2  -2   65.69   27.80
  13   2  -2  101.29   30.80
 -13  -2  -2   56.79   27.20
  13   2  -2   65.79   29.80
 -13  -3   2   12.80   18.20
   3 -13   2   30.20   25.10
  13   3   2   35.00   23.70
  -3  13   2   15.20   19.60
  13   3   2  -15.80   21.50
 -13  -3   2    4.90   23.80
  -3  13   2  -18.60   22.40
   3 -13   2   46.10   26.80
  13   3  -2   27.50   25.70
  13   3  -2    4.60   30.80
   3 -13  -2   17.60   26.50
  -3  13  -2    6.20   23.20
  -3  13  -2   15.60   24.00
 -13  -3  -2    9.80   25.20
   3 -13  -2   -0.50   23.50
 -13  -3  -2   -3.00   22.20
   4 -13   2  189.98   35.60
   4 -13   2  150.18   35.00
 -13  -4   2  110.69   25.00
  -4  13   2  198.28   37.60
  13   4   2  148.69   31.40
  13   4   2  135.09   32.40
  -4  13   2  195.08   33.40
 -13  -4   2  182.58   35.80
   4 -13  -2  126.69   32.40
  -4  13  -2  214.48   37.50
   4 -13  -2  200.58   39.20
 -13  -4  -2  198.78   36.70
 -13  -4  -2  151.18   50.59
  13   4  -2  136.19   33.80
  -4  13  -2  198.08   39.40
 -13  -5   2   40.50   21.70
  13   5   2   93.09   29.80
 -13  -5   2   60.19   27.60
   5 -13   2   60.39   27.70
  -5  13   2   32.00   20.00
  -5  13   2   36.80   27.70
  13   5   2   30.60   26.40
   5 -13   2   84.29   29.40
  13   5  -2   77.99   32.70
  13   5  -2   45.40   25.40
 -13  -5  -2   42.30   28.80
 -13  -5  -2   83.29   29.60
  -5  13  -2   40.10   27.80
   5 -13  -2   17.30   25.90
  -5  13  -2   25.10   23.90
   5 -13  -2   28.90   31.60
  13   6   2   41.80   28.50
  13   6   2   38.40   26.00
 -13  -6   2   48.10   22.10
  -6  13   2   39.30   22.40
  -6  13   2   64.49   29.90
 -13  -6   2   24.50   27.70
   6 -13   2    1.70   25.70
   6 -13   2   23.40   27.80
  -6  13  -2   74.39   29.80
   6 -13  -2  -17.70   23.20
 -13  -6  -2   52.99   29.80
 -13  -6  -2   49.99   31.90
  13   6  -2   67.49   30.50
  13   6  -2   55.39   30.40
   6 -13  -2   47.10   33.10
   7 -13   2   20.90   28.70
 -13  -7   2   48.50   29.60
  13   7   2   44.10   30.40
  -7  13   2   45.00   29.30
  -7  13   2   54.69   23.50
  13   7   2   16.40   24.80
   7 -13   2   20.00   25.90
 -13  -7   2   59.09   29.70
   7 -13  -2   68.19   34.20
   7 -13  -2   36.70   28.50
  -7  13  -2   20.40   25.60
  13   7  -2   30.90   26.40
 -13  -7  -2   70.69   31.30
  13   7  -2   39.90   28.50
 -13  -7  -2   21.70   30.40
  -7  13  -2   82.59   29.10
   8 -13   2   76.89   32.00
   8 -13   2   40.50   29.80
  13   8   2   66.39   29.10
  -8  13   2   18.60   20.00
 -13  -8   2   34.50   26.60
  -8  13   2   25.10   29.60
  13   8   2   72.79   28.30
 -13  -8   2   54.19   29.00
   8 -13  -2   -1.20   26.00
 -13  -8  -2   24.50   26.80
  13   8  -2   60.79   29.90
  13   8  -2   17.00   28.80
 -13  -8  -2   55.09   31.10
   8 -13  -2   92.59   36.30
  -8  13  -2   36.30   25.30
  13   9   2   97.59   33.50
 -13  -9   2   69.49   32.30
   9 -13   2  116.69   38.50
  13   9   2   37.00   26.60
  -9  13   2   42.60   25.00
 -13  -9   2   48.00   26.90
   9 -13   2   74.39   32.40
 -13  -9  -2   30.80   33.90
   9 -13  -2   75.29   32.40
 -13  -9  -2   86.69   33.40
   9 -13  -2   59.09   34.80
  -9  13  -2   93.39   35.10
  13   9  -2   41.00   31.20
  13   9  -2   43.30   33.00
 -13 -10   2   -1.60   24.30
  13  10   2  -16.30   25.50
  10 -13   2   31.80   29.20
 -10  13   2   -2.50   19.00
  13  10   2   22.60   25.60
  10 -13   2   26.00   35.10
 -13 -10   2  -20.40   28.50
 -13 -10  -2  -33.00   23.50
  10 -13  -2    1.30   33.20
  10 -13  -2  -12.50   28.40
 -10  13  -2   24.40   27.00
  13  10  -2    0.80   28.50
  13  10  -2  -18.50   28.70
 -10  13  -2  -10.10   23.40
 -13 -10  -2   37.20   33.60
  11 -13   2   -2.00   27.10
 -13 -11   2   17.20   31.60
  13  11   2   19.70   31.00
 -11  13   2   32.40   22.00
 -13 -11   2  -30.30   21.80
  13  11   2   -6.90   28.90
  11 -13   2   21.40   37.70
  11 -13  -2   -4.60   31.10
 -11  13  -2   12.60   25.00
  13  11  -2  -34.70   28.80
 -13 -11  -2   23.90   28.80
 -11  13  -2   24.90   27.70
 -13 -11  -2   15.00   34.20
  13  11  -2   25.70   34.30
  11 -13  -2  -21.50   29.50
 -13 -12   2   -4.10   32.50
  13  12   2    9.80   28.80
  12 -13   2  -41.00   28.00
  13  12   2  -29.10   26.70
 -12  13   2  -21.00   19.60
 -12  13   2   17.00   23.30
 -13 -12   2  -44.60   23.20
  12 -13   2  -21.10   31.70
  13  12  -2  -38.70   28.00
 -12  13  -2   -6.20   23.80
 -13 -12  -2  -41.50   28.10
 -13 -12  -2   55.19   45.80
  13  12  -2   27.80   35.00
  12 -13  -2  -33.80   27.60
 -12  13  -2   16.20   24.10
  12 -13  -2  -45.10   32.20
  13  13   2  -29.20   28.40
  13 -13   2   -1.90   35.30
 -13 -13   2   40.30   33.20
 -13 -13   2  -51.99   26.50
  13 -13   2   -7.70   34.10
 -13  13   2    4.00   20.10
 -13  13   2   -0.90   18.60
 -13  13  -2   14.40   26.00
  13  13  -2  -37.50   26.70
  13  13  -2  -47.00   31.30
 -13 -13  -2  -18.10   29.70
  13 -13  -2    1.80   36.10
  13 -13  -2   -9.20   36.30
 -13  13  -2   11.10   25.60
 -13 -13  -2  -24.10   31.70
  13  14   2   -3.30   31.30
  13  14   2   -0.60   32.10
 -13 -14   2  -48.00   35.10
  14 -13   2  -33.20   35.40
 -14  13   2    5.10   21.40
 -14  13   2    0.80   23.00
 -13 -14  -2  -17.40   35.30
 -14  13  -2    5.20   28.70
  14 -13  -2  -16.70   33.30
  13  14  -2   -3.90   31.00
  13  14  -2   -7.90   30.40
 -14  13  -2  -69.09   23.10
 -13 -14  -2   69.59   34.50
  14 -13  -2  -18.70   30.30
  12  14   2  -25.10   27.60
 -14  12   2   -3.30   20.40
  14 -12   2  -26.60   34.70
 -12 -14   2  -63.39   28.70
  14 -12   2  -64.19   29.70
 -14  12   2    2.30   24.20
 -12 -14   2   34.10   32.80
 -12 -14  -2   28.60   35.70
  14 -12  -2   63.59   40.30
 -14  12  -2   49.70   29.50
  12  14  -2   45.00   31.00
  14 -12  -2   36.60   37.90
 -14  12  -2   11.10   26.30
 -12 -14  -2  -37.80   32.60
  12  14  -2  -25.80   34.00
  14 -11   2  -15.00   28.20
 -11 -14   2  -21.60   27.10
 -14  11   2   -6.80   20.60
  11  14   2   16.00   29.80
 -11 -14   2   41.80   37.10
  11  14   2   -5.60   24.40
 -14  11   2    6.20   18.70
  14 -11  -2  -36.50   34.30
  11  14  -2   35.20   33.70
  11  14  -2   41.70   34.50
  14 -11  -2  -41.60   28.20
 -14  11  -2   -3.70   28.90
 -11 -14  -2   34.10   53.39
 -14  11  -2   23.30   24.50
 -11 -14  -2  -40.60   31.00
 -14  10   2  -12.20   21.70
 -10 -14   2  -39.10   22.80
  14 -10   2    7.60   33.90
 -14  10   2   22.00   21.50
  14 -10   2   34.50   29.50
  10  14   2   22.50   28.00
 -10 -14   2  -13.90   31.90
  10  14   2   63.69   34.00
 -10 -14  -2   31.90   35.10
 -10 -14  -2   24.20   30.60
 -14  10  -2  -10.20   22.80
  14 -10  -2    2.90   33.30
  10  14  -2   44.90   33.20
  10  14  -2   -7.20   36.30
  14 -10  -2   -9.30   33.90
 -14  10  -2   25.30   26.40
 -14   9   2   65.99   27.50
  14  -9   2   85.19   35.00
   9  14   2   67.49   32.00
   9  14   2   51.99   26.80
  -9 -14   2   57.69   35.80
  -9 -14   2   97.59   36.00
  14  -9   2   78.89   36.70
 -14   9   2   88.09   27.40
   9  14  -2  126.19   37.60
  14  -9  -2  101.99   36.10
   9  14  -2  107.09   36.10
  -9 -14  -2   54.19   28.20
 -14   9  -2   74.09   34.00
  -9 -14  -2   62.09   37.50
  14  -9  -2  101.19   39.10
 -14   9  -2   81.49   30.60
 -14   8   2   98.69   28.10
  14  -8   2   73.39   32.10
   8  14   2  116.39   31.90
 -14   8   2  125.59   29.90
  -8 -14   2  118.39   38.80
  -8 -14   2   68.59   32.10
   8  14   2  148.49   37.50
  14  -8   2   70.29   35.70
  -8 -14  -2   94.69   41.50
   8  14  -2   83.59   34.10
 -14   8  -2  156.78   37.40
  -8 -14  -2  135.89   37.10
   8  14  -2   82.89   33.70
 -14   8  -2  157.18   33.00
  14  -8  -2  169.48   39.90
  14  -8  -2   94.69   38.70
 -14   7   2   31.50   21.10
  14  -7   2   20.10   30.20
   7  14   2   22.00   27.40
  -7 -14   2    7.60   27.80
  14  -7   2   34.90   24.80
 -14   7   2   28.60   22.00
   7  14   2   19.00   25.80
  -7 -14   2   65.39   29.70
 -14   7  -2   15.50   25.10
  14  -7  -2   25.60   29.20
  -7 -14  -2  -28.80   28.60
  -7 -14  -2   -1.90   27.20
   7  14  -2    5.30   26.40
   7  14  -2    7.00   30.10
 -14   7  -2    1.00   23.90
  14  -7  -2   22.00   31.40
  -6 -14   2   23.60   30.70
  14  -6   2   27.40   29.40
   6  14   2  -10.30   27.10
 -14   6   2  -35.80   19.20
   6  14   2    5.70   21.90
  -6 -14   2    2.80   26.40
 -14   6   2    2.20   17.80
  14  -6   2   23.90   27.40
  14  -6  -2   16.20   26.10
  14  -6  -2  -10.90   29.20
   6  14  -2  -20.60   25.30
   6  14  -2  -31.00   26.00
 -14   6  -2   21.60   28.10
 -14   6  -2   19.60   23.40
  -6 -14  -2  -25.40   26.30
  -6 -14  -2  -23.20   25.80
 -14   5   2   15.40   18.10
  -5 -14   2   10.20   26.90
   5  14   2   -5.30   21.20
 -14   5   2   62.99   26.70
  14  -5   2   98.09   30.20
   5  14   2   41.40   28.30
  14  -5   2   -2.50   21.60
  -5 -14   2  -13.20   22.00
  14  -5  -2    9.80   28.50
  -5 -14  -2  -23.70   24.00
  14  -5  -2  -18.10   24.10
 -14   5  -2   49.20   22.30
 -14   5  -2   13.50   24.20
   5  14  -2   59.29   27.00
  -5 -14  -2   21.20   32.10
   5  14  -2   48.90   27.90
  -4 -14   2  188.48   38.30
   4  14   2  128.39   34.20
   4  14   2  133.59   30.60
 -14   4   2   65.49   22.30
  -4 -14   2  116.09   33.70
  14  -4   2  118.09   34.40
 -14   4   2  120.29   30.90
  14  -4   2  123.59   34.30
  14  -4  -2  100.59   32.10
   4  14  -2  115.79   32.70
  14  -4  -2  114.19   39.20
 -14   4  -2  164.38   37.50
  -4 -14  -2  101.29   34.00
  -4 -14  -2  141.89   40.60
 -14   4  -2  120.59   29.10
   4  14  -2  162.78   35.90
  14  -3   2   87.99   33.10
  14  -3   2  104.79   32.20
 -14   3   2   61.39   25.20
  -3 -14   2   82.29   29.90
 -14   3   2   37.50   19.60
   3  14   2   65.49   30.40
   3  14   2   70.59   26.50
  -3 -14   2   70.39   30.70
  14  -3  -2   65.99   29.30
  14  -3  -2   93.09   36.50
 -14   3  -2   75.69   30.30
 -14   3  -2   55.49   24.50
  -3 -14  -2   81.89   31.90
   3  14  -2   87.89   29.80
  -3 -14  -2   75.49   35.20
   3  14  -2  134.49   42.90
 -14   2   2   61.09   25.60
  14  -2   2   48.80   26.50
  -2 -14   2   88.69   29.60
   2  14   2  104.09   28.90
  14  -2   2   75.69   29.90
 -14   2   2   89.79   21.80
  -2 -14   2   71.29   26.80
   2  14   2   99.19   32.70
  -2 -14  -2   80.09   31.00
   2  14  -2   54.39   43.10
 -14   2  -2   72.69   28.80
  -2 -14  -2  115.69   34.60
   2  14  -2   66.89   29.40
 -14   2  -2  152.48   46.60
  14  -2  -2  134.29   37.40
  14  -2  -2   89.89   31.40
   1  14   2   33.90   26.90
  -1 -14   2   15.20   25.50
  14  -1   2   46.60   28.10
   1  14   2   40.50   21.60
 -14   1   2   58.09   19.10
  14  -1   2   36.50   26.20
 -14   1   2   33.80   25.30
  14  -1  -2   39.10   28.30
  14  -1  -2   76.79   33.70
  -1 -14  -2   27.60   26.60
   1  14  -2   18.40   29.30
 -14   1  -2   62.79   40.80
  -1 -14  -2  -14.40   25.30
   1  14  -2   59.09   26.40
 -14   1  -2    9.00   23.20
 -14   0   2  153.78   27.80
  14   0   2  145.09   35.60
   0  14   2  201.78   34.80
 -14   0   2  223.98   38.90
   0  14   2  161.28   35.70
   0 -14   2  169.78   36.50
  14   0   2  192.68   36.00
   0  14  -2  187.28   38.10
  14   0  -2  146.99   38.20
   0  14  -2  207.18   41.10
 -14   0  -2  242.28   39.80
 -14   0  -2  287.87   62.09
  14   0  -2  153.68   34.00
   0 -14  -2  213.08   39.30
  14   1   2   47.20   25.50
   1 -14   2   46.60   26.60
  14   1   2   10.20   23.40
   1 -14   2   18.90   22.50
  -1  14   2   17.90   21.40
  -1  14   2    5.90   24.80
 -14  -1   2   57.29   28.40
 -14  -1   2   21.70   16.10
 -14  -1  -2   44.90   31.60
  14   1  -2   13.60   27.20
  -1  14  -2   53.89   28.90
  14   1  -2   60.69   32.00
 -14  -1  -2   29.30   24.20
  -1  14  -2   50.79   28.00
   1 -14  -2   40.10   27.70
  14   2   2  110.79   31.10
  14   2   2   80.19   30.20
   2 -14   2  115.59   31.90
 -14  -2   2  131.29   33.70
 -14  -2   2   31.60   18.60
  -2  14   2  100.69   28.10
   2 -14   2   83.69   28.60
  -2  14   2  112.49   32.30
  14   2  -2  143.59   37.30
 -14  -2  -2   77.09   29.40
  -2  14  -2  123.59   31.90
  -2  14  -2   61.79   33.60
  14   2  -2  102.69   34.10
 -14  -2  -2  192.18   37.30
   2 -14  -2  152.88   37.60
   2 -14  -2  112.79   34.00
   3 -14   2   72.89   28.90
  -3  14   2   97.99   32.80
  14   3   2  122.49   33.50
  14   3   2   40.80   29.10
  -3  14   2   70.29   25.20
   3 -14   2  118.49   32.20
 -14  -3   2   81.39   24.70
 -14  -3   2   94.29   33.00
   3 -14  -2   93.89   36.70
   3 -14  -2  100.49   31.40
  -3  14  -2   66.09   29.10
  14   3  -2  127.59   35.40
 -14  -3  -2   53.79   29.90
 -14  -3  -2  131.89   34.40
  14   3  -2   99.09   35.00
 -14  -4   2  171.38   39.30
 -14  -4   2   86.99   26.00
   4 -14   2  153.38   38.50
  -4  14   2  106.29   33.10
   4 -14   2  210.88   39.40
  14   4   2  154.28   33.80
  14   4   2   80.19   31.90
  -4  14   2  115.19   26.90
   4 -14  -2  162.98   39.60
  14   4  -2  147.49   39.90
 -14  -4  -2  133.89   34.80
  -4  14  -2  131.29   34.10
   4 -14  -2  113.69   33.00
 -14  -4  -2  138.49   35.30
  -4  14  -2  171.68   36.90
  14   4  -2  151.18   35.00
  -5  14   2  -18.50   24.30
 -14  -5   2   70.19   30.90
  14   5   2   23.60   27.70
   5 -14   2   38.40   27.80
  -5  14   2   20.80   21.30
  14   5   2   60.29   28.50
 -14  -5   2   40.60   22.10
   5 -14   2   18.90   27.80
  14   5  -2   49.80   29.70
 -14  -5  -2   40.10   30.80
 -14  -5  -2   57.09   29.90
  -5  14  -2   77.39   27.00
   5 -14  -2  -31.50   23.20
  -5  14  -2  -41.20   20.20
   5 -14  -2   17.50   32.10
  14   5  -2   41.30   31.70
   6 -14   2   40.70   29.40
  -6  14   2   -9.40   27.00
 -14  -6   2   29.60   27.00
  14   6   2   64.99   30.00
  -6  14   2   89.69   27.60
  14   6   2   36.50   27.40
 -14  -6   2   18.50   20.20
   6 -14   2    9.60   28.40
 -14  -6  -2   19.70   27.30
 -14  -6  -2   14.40   25.50
  14   6  -2  -25.80   24.50
   6 -14  -2   52.39   32.00
  -6  14  -2    5.00   29.70
  -6  14  -2    0.60   24.20
  14   6  -2   30.90   28.40
   6 -14  -2   49.80   33.20
 -14  -7   2   31.90   29.50
  14   7   2   73.89   30.60
   7 -14   2  -28.80   25.10
 -14  -7   2   41.00   23.60
  -7  14   2    6.50   26.60
   7 -14   2  -17.90   26.40
  -7  14   2   15.10   23.20
  14   7   2  -17.70   26.40
 -14  -7  -2   14.30   26.80
 -14  -7  -2   16.40   32.10
   7 -14  -2   36.60   30.60
  -7  14  -2  -31.70   25.90
   7 -14  -2  -40.50   24.80
  -7  14  -2  -39.60   23.70
  14   7  -2   38.80   31.60
  14   7  -2  -32.40   27.60
 -14  -8   2  105.29   33.00
  -8  14   2  116.79   35.80
  -8  14   2   71.99   26.30
   8 -14   2  103.69   38.90
  14   8   2  165.78   37.40
   8 -14   2  132.39   38.30
 -14  -8   2  133.69   37.80
  14   8   2  120.29   36.50
  14   8  -2   77.69   35.40
 -14  -8  -2  100.39   38.90
   8 -14  -2  125.99   36.90
  14   8  -2  174.68   41.80
  -8  14  -2  145.79   35.90
   8 -14  -2   67.49   37.00
 -14  -8  -2  125.89   38.10
  -8  14  -2   89.29   34.70
  14   9   2   66.09   30.00
  -9  14   2   36.30   31.10
   9 -14   2   79.89   37.60
 -14  -9   2  100.49   33.30
  -9  14   2   83.59   25.30
  14   9   2   44.10   30.50
 -14  -9   2  138.19   39.60
   9 -14   2   49.80   33.50
  14   9  -2   54.49   30.30
   9 -14  -2   33.60   29.30
 -14  -9  -2  104.49   35.50
  14   9  -2  142.69   38.90
   9 -14  -2  139.39   40.00
  -9  14  -2   99.09   36.40
 -14  -9  -2   76.39   35.00
  10 -14   2  -34.30   26.40
  10 -14   2  -45.20   30.40
 -10  14   2   31.30   22.10
 -14 -10   2   64.19   29.70
  14  10   2  -35.10   26.20
  14  10   2   40.30   31.30
 -14 -10   2   60.69   34.20
  10 -14  -2  117.19   38.70
 -14 -10  -2   21.80   35.40
 -14 -10  -2   36.60   30.60
  10 -14  -2  -15.40   27.50
  14  10  -2   15.20   30.80
 -10  14  -2   -4.40   22.30
  14  10  -2   15.90   53.79
  14  11   2    4.70   29.30
  11 -14   2  -24.40   26.60
  14  11   2    0.80   31.10
 -11  14   2  -17.10   21.00
  11 -14   2  -16.00   32.70
 -14 -11   2   56.49   36.30
 -14 -11   2   -6.20   27.20
 -14 -11  -2  -59.39   25.00
  11 -14  -2  -53.49   32.10
 -14 -11  -2  -83.19   49.70
  14  11  -2    1.40   28.40
  14  11  -2   -1.20   30.50
 -11  14  -2   19.40   27.20
  11 -14  -2   70.69   35.40
  12 -14   2  -14.30   35.10
  14  12   2   41.50   54.09
 -14 -12   2  -46.10   25.00
  12 -14   2   -0.50   38.10
 -14 -12   2  -25.70   29.50
 -12  14   2    9.40   20.40
  14  12   2  -49.10   26.20
 -14 -12  -2  -29.70   32.10
 -12  14  -2  -39.40   21.90
  14  12  -2   -1.00   31.90
 -14 -12  -2   -5.40   32.40
 -12  14  -2  -23.50   24.40
  14  12  -2  -11.10   34.30
  12 -14  -2  -13.30   36.60
  12 -14  -2  -22.90   32.40
 -13  14   2  -12.30   21.40
  13 -14   2    9.10   38.30
 -14 -13   2   23.30   39.90
  14  13   2   21.00   34.90
 -14 -13   2  -61.29   29.10
  14  13   2   58.69   36.90
 -14 -13  -2   13.80   37.20
 -13  14  -2    0.40   28.40
  13 -14  -2   -1.80   34.40
  14  13  -2  -18.50   29.60
  14  13  -2   32.80   32.80
 -13  14  -2  -16.10   24.20
  13 -14  -2  -20.10   30.70
 -14 -13  -2  -13.40   27.50
  14 -14   2  -25.60   38.20
 -14 -14   2   -4.80   38.60
 -14 -14   2  -32.70   40.20
 -14  14   2  -29.70   18.80
  14  14   2   14.50   34.10
  14 -14   2  -91.39   49.50
  14  14   2  -69.59   27.60
 -14  14   2    3.10   22.60
 -14  14  -2  -42.80   29.10
  14  14  -2  -10.10   33.50
  14 -14  -2   28.20   36.80
 -14 -14  -2   -9.60   33.10
  14  14  -2  -57.19   29.20
 -14 -14  -2  -37.40   30.20
 -14  14  -2   22.60   24.30
  14 -14  -2 -118.89   40.10
  14  15   2   34.00   36.10
 -15  14   2   -6.80   26.70
  15 -14   2   -5.50   42.10
 -14 -15   2  -96.19   38.70
  15 -14   2  -19.80   36.40
 -14 -15   2  -46.70   31.90
 -14 -15  -2  -25.00   34.10
  14  15  -2  -47.00   28.40
  15 -14  -2  -44.10   40.00
  15 -14  -2  -18.20   39.40
 -15  14  -2   -5.70   25.90
 -15  14  -2   46.80   35.90
 -14 -15  -2  -39.20   46.90
  14  15  -2  -11.20   38.40
 -13 -15   2  -42.30   31.00
  13  15   2  -22.20   31.60
 -15  13   2   28.30   26.20
  15 -13   2  -21.60   51.59
 -15  13   2   -8.60   18.20
 -13 -15   2  -75.09   38.30
  13  15   2   15.00   34.50
  13  15  -2  -57.49   29.50
  13  15  -2   12.30   33.30
 -15  13  -2   11.10   27.20
  15 -13  -2  -14.80   35.70
 -13 -15  -2  -20.40   33.90
 -15  13  -2   19.00   32.10
 -13 -15  -2  -30.20   33.90
  15 -12   2   12.20   52.59
  15 -12   2    4.70   38.40
  12  15   2   26.80   33.50
 -15  12   2  -20.80   21.10
  12  15   2   -5.90   32.50
 -12 -15   2  -42.40   38.10
 -12 -15   2  -41.00   30.40
 -15  12   2   15.60   24.50
  15 -12  -2  -37.00   29.00
 -15  12  -2  -36.60   24.40
  15 -12  -2    1.50   35.70
 -12 -15  -2   44.10   34.80
  12  15  -2  -62.59   29.20
  12  15  -2  -10.80   28.20
 -12 -15  -2  -54.09   31.20
 -15  12  -2   15.00   28.70
  15 -11   2   30.60   35.70
 -11 -15   2   45.90   38.40
  11  15   2   56.29   38.20
 -15  11   2   58.09   29.10
 -15  11   2   24.30   20.60
 -11 -15   2    8.20   35.90
  11  15   2   37.10   32.10
  15 -11   2    5.50   34.00
 -11 -15  -2   -5.00   34.80
 -11 -15  -2   53.49   36.00
  15 -11  -2    3.00   34.50
 -15  11  -2   -8.60   27.20
 -15  11  -2   32.00   26.90
  15 -11  -2   19.90   36.70
  11  15  -2  151.28   38.20
  11  15  -2  103.09   41.40
  15 -10   2    6.70   33.70
 -15  10   2   19.10   32.40
  10  15   2    2.40   26.90
 -10 -15   2  -63.59   29.10
 -10 -15   2  -28.30   28.10
  15 -10   2  -15.20   31.50
  10  15   2   29.60   31.40
 -15  10   2   14.70   23.60
 -15  10  -2  -47.70   20.10
 -10 -15  -2  -84.69   30.30
 -10 -15  -2   48.80   60.59
  10  15  -2   12.40   29.40
  15 -10  -2  -34.30   31.40
 -15  10  -2   18.00   29.80
  10  15  -2  -33.20   29.50
  15  -9   2  -60.49   26.20
   9  15   2   38.70   32.10
  -9 -15   2  -32.30   26.50
 -15   9   2   -5.50   21.30
  15  -9   2   38.80   34.80
   9  15   2  -12.60   26.90
  -9 -15   2  -12.50   31.80
 -15   9   2   24.60   25.40
  15  -9  -2   38.20   32.50
  -9 -15  -2  -31.20   30.30
  15  -9  -2  -66.49   26.30
   9  15  -2  -29.10   30.60
   9  15  -2   26.30   29.20
 -15   9  -2   -5.30   22.90
 -15   9  -2  -42.80   22.30
  -9 -15  -2  -36.60   26.80
   8  15   2   30.00   28.90
   8  15   2   33.80   27.50
  -8 -15   2   31.10   29.60
  -8 -15   2   30.40   32.90
 -15   8   2   27.50   20.40
  15  -8   2  -15.90   31.50
  15  -8   2  -10.10   28.80
 -15   8   2  -21.00   19.40
  15  -8  -2   35.60   34.20
  15  -8  -2   -3.30   31.10
 -15   8  -2    5.50   26.40
 -15   8  -2    6.70   30.90
  -8 -15  -2  -37.10   30.80
   8  15  -2   -5.40   29.30
  -8 -15  -2   34.20   30.80
  -7 -15   2   50.09   32.60
  15  -7   2   -2.50   27.60
   7  15   2   21.60   23.70
  -7 -15   2    2.60   31.20
   7  15   2   41.50   30.40
 -15   7   2   53.09   23.50
  15  -7   2   36.20   31.50
 -15   7   2   47.90   26.10
 -15   7  -2   24.90   27.80
   7  15  -2   30.80   31.50
   7  15  -2   45.80   31.20
  15  -7  -2   61.49   35.30
  -7 -15  -2    3.80   30.00
  -7 -15  -2  -11.20   26.50
 -15   7  -2   12.00   22.10
  15  -7  -2  -63.89   28.00
  -6 -15   2  -42.10   29.70
  15  -6   2   40.70   28.50
 -15   6   2   19.10   23.50
 -15   6   2   15.60   19.30
   6  15   2   15.50   23.50
  -6 -15   2    5.70   25.30
   6  15   2   44.60   27.50
  15  -6   2   25.20   26.70
  15  -6  -2    4.50   29.60
 -15   6  -2  -13.70   19.50
  15  -6  -2   -2.60   27.00
 -15   6  -2   20.50   27.00
   6  15  -2  -37.90   25.70
  -6 -15  -2   20.70   35.30
   6  15  -2   39.80   29.40
  -6 -15  -2   -0.20   26.90
  15  -5   2   -4.10   31.60
 -15   5   2   -9.90   14.90
   5  15   2  -43.10   24.00
 -15   5   2   37.70   24.20
  -5 -15   2    4.60   29.60
  15  -5   2   31.90   28.00
  -5 -15   2   70.19   31.20
   5  15   2   -1.30   24.70
 -15   5  -2  -13.80   22.90
  -5 -15  -2   17.40   27.90
  -5 -15  -2   -8.80   29.40
   5  15  -2    8.10   30.50
 -15   5  -2    6.40   23.60
   5  15  -2  -11.80   26.30
  15  -5  -2    6.40   25.40
  15  -5  -2  -11.50   27.90
 -15   4   2   47.70   22.40
  15  -4   2   13.80   24.60
   4  15   2   21.80   25.20
 -15   4   2   59.39   24.50
  15  -4   2    2.90   27.90
  -4 -15   2   24.30   29.30
  -4 -15   2   52.49   32.70
   4  15   2   25.90   28.70
  15  -4  -2   41.70   35.50
  15  -4  -2   94.09   35.50
   4  15  -2   61.69   30.80
   4  15  -2   33.10   34.00
  -4 -15  -2   33.60   32.00
 -15   4  -2   18.30   27.10
 -15   4  -2    3.20   24.20
  -4 -15  -2   60.99   32.10
  -3 -15   2   -8.00   24.90
 -15   3   2   10.40   21.30
  -3 -15   2    0.40   26.40
   3  15   2  -50.39   24.80
  15  -3   2   47.80   30.10
 -15   3   2   10.30   22.80
   3  15   2   72.39   27.20
  15  -3   2   30.90   27.30
   3  15  -2   -6.90   28.60
   3  15  -2  -49.10   24.30
 -15   3  -2   68.69   29.70
  -3 -15  -2  -15.80   27.40
  15  -3  -2   -8.70   29.80
  15  -3  -2   42.50   31.40
  -3 -15  -2   24.20   28.30
 -15   3  -2   54.69   26.30
 -15   2   2   69.89   23.50
   2  15   2   68.49   31.00
  -2 -15   2   97.29   32.60
   2  15   2   96.69   28.80
  15  -2   2   63.49   31.20
  -2 -15   2   51.19   29.10
 -15   2   2   57.29   25.80
  15  -2   2  140.79   33.30
   2  15  -2   65.49   30.50
 -15   2  -2  102.09   32.30
  -2 -15  -2   55.29   33.60
  -2 -15  -2   81.29   35.20
  15  -2  -2   89.19   31.90
  15  -2  -2  138.19   38.30
   2  15  -2   82.79   33.00
 -15   2  -2   96.49   31.90
  -1 -15   2   55.19   29.60
  15  -1   2   84.79   32.50
 -15   1   2   41.60   20.20
  15  -1   2   46.90   25.40
 -15   1   2   48.50   29.00
   1  15   2   48.00   24.80
   1  15   2   39.90   29.80
   1  15  -2   45.40   25.80
  15  -1  -2   49.90   29.40
  -1 -15  -2   43.00   31.30
  -1 -15  -2   15.80   29.80
  15  -1  -2   47.10   29.10
   1  15  -2   50.29   30.60
 -15   1  -2   45.10   27.20
 -15   1  -2   61.19   28.00
 -15   0   2  497.25   57.39
  15   0   2  529.05   60.99
   0 -15   2  474.15   58.09
   0 -15   2  485.75   59.19
   0  15   2  495.25   55.69
   0  15   2  457.55   57.69
  15   0   2  417.76   53.09
  15   0  -2  378.96   51.09
 -15   0  -2  452.25   55.29
  15   0  -2  503.85   60.79
 -15   0  -2  351.26   48.60
   0  15  -2  338.57   50.39
   0  15  -2  382.66   49.90
   1 -15   2   68.69   32.00
  -1  15   2   67.69   31.60
 -15  -1   2   48.80   19.30
   1 -15   2   90.09   31.60
  15   1   2   37.60   28.00
 -15  -1   2   85.59   31.30
  -1  15   2   44.80   24.20
  15   1   2  111.29   31.40
  -1  15  -2   11.90   27.80
 -15  -1  -2   72.29   32.30
   1 -15  -2   30.40   31.70
  15   1  -2  126.69   36.10
   1 -15  -2   37.60   30.30
  15   1  -2  136.09   37.30
  -1  15  -2   47.70   26.00
 -15  -1  -2   67.39   29.40
   2 -15   2   32.80   29.90
  -2  15   2   61.79   26.60
  15   2   2   21.80   27.80
 -15  -2   2   60.79   21.80
  -2  15   2   77.99   32.60
  15   2   2   88.39   29.20
 -15  -2   2   64.19   29.90
   2 -15   2   40.20   29.50
  15   2  -2  110.49   33.70
 -15  -2  -2   57.69   29.70
 -15  -2  -2  104.19   33.70
   2 -15  -2   61.09   33.10
   2 -15  -2   71.79   33.50
  -2  15  -2  108.09   31.80
  15   2  -2   89.09   32.10
  -2  15  -2   95.99   33.90
   3 -15   2  110.09   33.20
  15   3   2   -0.10   23.00
  15   3   2    6.00   24.80
  -3  15   2   61.19   25.60
  -3  15   2  -13.80   25.80
 -15  -3   2   42.10   22.30
   3 -15   2   33.20   30.20
 -15  -3   2    4.20   26.00
  15   3  -2   63.69   32.20
  -3  15  -2   22.80   31.40
   3 -15  -2   22.10   27.40
 -15  -3  -2   15.00   26.60
 -15  -3  -2   31.60   28.90
   3 -15  -2   61.39   33.70
  15   3  -2   12.70   28.30
  -3  15  -2   46.20   29.20
  15   4   2  108.29   36.40
 -15  -4   2   98.59   33.10
 -15  -4   2   30.10   20.80
  -4  15   2   28.30   25.70
  15   4   2   99.79   34.70
   4 -15   2   33.30   30.50
  -4  15   2  -25.80   26.60
   4 -15   2   32.30   29.90
 -15  -4  -2    8.80   29.30
   4 -15  -2   -8.10   30.10
  -4  15  -2    7.30   30.10
  15   4  -2   -9.10   28.40
   4 -15  -2   28.30   29.50
 -15  -4  -2   27.30   30.20
  -4  15  -2   44.30   28.50
  15   4  -2    3.10   26.00
 -15  -5   2  -12.80   23.80
  15   5   2  -21.40   22.90
   5 -15   2   11.10   27.50
 -15  -5   2  -18.70   18.90
  -5  15   2  -28.50   19.50
  15   5   2   27.40   27.60
   5 -15   2  -12.40   26.80
  -5  15   2  -34.60   22.20
 -15  -5  -2   26.70   31.30
 -15  -5  -2    7.70   25.90
   5 -15  -2   -6.30   28.70
  -5  15  -2   25.50   28.40
   5 -15  -2   32.80   31.10
  15   5  -2  -31.20   26.00
  -5  15  -2  -22.90   26.90
  15   5  -2  -28.10   27.30
  15   6   2   53.09   30.00
   6 -15   2    5.10   29.30
  15   6   2   40.60   31.20
   6 -15   2   -7.00   31.00
 -15  -6   2    6.80   20.90
 -15  -6   2   18.90   28.90
  -6  15   2    7.90   21.20
 -15  -6  -2   12.90   30.50
  -6  15  -2   14.20   24.00
  15   6  -2   13.60   29.60
   6 -15  -2   -4.50   27.20
  15   6  -2   23.50   32.70
  -6  15  -2  -30.50   27.50
   6 -15  -2  -11.30   29.50
 -15  -6  -2   50.39   32.90
   7 -15   2   33.80   34.00
  -7  15   2   27.90   28.90
  -7  15   2   61.09   26.60
   7 -15   2   29.50   30.50
  15   7   2   21.20   30.90
 -15  -7   2   29.10   25.30
  15   7   2    6.80   26.80
 -15  -7   2   43.30   29.90
   7 -15  -2   66.99   37.00
  -7  15  -2   75.09   44.50
 -15  -7  -2   13.80   28.50
   7 -15  -2   81.59   36.70
  -7  15  -2   39.70   30.60
 -15  -7  -2   23.80   28.00
  15   7  -2  -25.30   28.50
  15   7  -2   45.00   33.10
  -8  15   2  -18.80   16.90
  15   8   2  -14.40   25.60
   8 -15   2  -29.80   26.80
  15   8   2  -34.50   25.80
 -15  -8   2   52.29   32.40
   8 -15   2   63.79   37.80
 -15  -8   2   38.60   26.10
  -8  15   2    0.40   28.00
  15   8  -2   24.70   33.60
  15   8  -2  -15.00   27.50
 -15  -8  -2   25.70   30.20
   8 -15  -2  -22.70   29.80
   8 -15  -2   32.40   30.40
  -8  15  -2    8.20   23.80
  -8  15  -2   -9.20   29.90
 -15  -8  -2  -20.30   30.50
  15   9   2  -36.50   25.60
 -15  -9   2   -6.20   24.40
  15   9   2   67.99   32.20
   9 -15   2   15.40   32.30
 -15  -9   2   16.70   32.90
   9 -15   2  -24.40   26.80
  -9  15   2   14.90   23.50
  -9  15   2  -30.30   25.50
  15   9  -2  -12.00   30.30
  -9  15  -2   20.90   31.80
 -15  -9  -2  -13.80   31.50
   9 -15  -2   17.20   32.50
   9 -15  -2  -31.20   31.70
  15   9  -2   11.50   34.00
 -15  -9  -2    7.40   39.70
  -9  15  -2   32.60   26.80
  10 -15   2   51.89   33.00
  15  10   2    7.70   28.80
 -15 -10   2  -20.00   30.30
 -10  15   2   -6.00   21.10
 -15 -10   2  -35.80   22.10
  10 -15   2  -40.50   32.80
 -15 -10  -2   10.50   34.90
 -10  15  -2   34.50   31.80
 -15 -10  -2   10.20   32.50
  15  10  -2  -14.20   27.40
  10 -15  -2   13.00   34.90
  15  10  -2  -54.69   28.90
  10 -15  -2   23.80   36.70
 -11  15   2   17.10   23.40
 -15 -11   2   28.20   45.00
  15  11   2   -4.20   31.70
  11 -15   2   21.20   38.00
  15  11   2  -16.50   35.90
  11 -15   2   28.60   33.60
 -11  15   2   43.80   30.20
 -15 -11   2   10.90   33.50
  15  11  -2   34.40   32.10
  11 -15  -2   14.00   34.80
 -15 -11  -2  -21.80   34.20
  11 -15  -2  -22.00   32.20
  15  11  -2  -38.80   33.30
 -15 -11  -2  -11.70   32.90
 -11  15  -2  -28.70   24.20
  15  12   2  -35.10   28.00
  12 -15   2  -52.39   35.70
 -15 -12   2   53.19   44.00
 -12  15   2  -38.50   19.10
  15  12   2  -29.60   32.40
 -15 -12   2  -34.30   26.70
  12 -15   2  -90.39   33.80
 -15 -12  -2  -35.80   33.30
  12 -15  -2   -2.30   32.90
  12 -15  -2  -68.79   33.10
 -12  15  -2   -9.50   25.40
  15  12  -2   -3.50   31.10
  15  12  -2   28.40   33.80
 -15 -12  -2    7.30   29.80
 -15 -13   2  -35.50   38.20
  13 -15   2  -90.79   44.10
  15  13   2  -65.89   28.40
 -13  15   2   20.30   24.60
 -15 -13   2    8.40   39.10
  15  13   2  -29.60   34.40
  13 -15   2 -101.49   34.20
 -15 -13  -2  -47.60   35.00
  13 -15  -2  -32.20   48.10
  13 -15  -2  -36.10   33.90
  15  13  -2  -32.10   34.50
 -13  15  -2    5.30   33.00
 -15 -13  -2  -21.30   32.60
 -14  15   2  -40.60   23.60
  15  14   2   21.00   35.80
 -15 -14   2  -43.10   40.60
  14 -15   2  -44.10   43.10
 -15 -14   2  -17.10   37.00
  14 -15   2   28.90   40.40
  15  14  -2  -21.20   36.30
 -15 -14  -2  -74.39   35.90
 -14  15  -2  -64.99   24.60
  14 -15  -2   -3.40   40.70
  14 -15  -2 -106.49   36.10
 -15 -14  -2  -47.30   45.10
  15  14  -2   10.70   35.10
 -14  15  -2  -19.10   29.70
  15  15   2   -7.60   45.40
 -15 -15   2   -8.00   43.80
  15 -15   2   17.50   45.60
 -15  15   2  -22.50   30.00
  15 -15  -2  -33.10   39.40
 -15  15  -2  -23.80   27.90
 -15 -15  -2  -40.00   37.60
  15  15  -2   55.39   47.80
  15 -15  -2   -3.70   40.60
 -15  15  -2   41.60   31.30
  15  15  -2  -11.80   39.80
 -15 -15  -2  -67.19   31.10
  15  16  -2   22.30   45.50
 -16  15  -2  -51.09   30.90
  15  16  -2    6.10   40.10
  16 -15  -2  -19.70   50.99
 -16  15  -2   78.49   44.50
  16 -15  -2  -96.29   41.60
 -15 -16  -2  -85.99   41.10
 -15 -16  -2  -18.60   42.30
 -16  14   2  -28.90   34.50
  14  16   2   19.90   52.99
  16 -14   2  102.29   48.90
 -16  14  -2  -46.60   36.90
 -14 -16  -2  -18.20   36.20
  14  16  -2  -84.19   34.20
  16 -14  -2  -74.49   39.60
 -16  14  -2   36.80   29.70
  14  16  -2   44.00   41.10
 -14 -16  -2  -43.30   32.40
  16 -14  -2  -27.00   42.40
  16 -13   2   19.80   43.90
  16 -13   2   -8.80   39.90
 -13 -16   2  -26.60   36.50
 -13 -16   2   -7.50   44.20
 -16  13   2  -30.10   24.50
  13  16   2  -17.30   31.20
 -13 -16  -2   -1.70   39.00
  13  16  -2   28.40   35.40
  16 -13  -2  -82.59   32.10
  16 -13  -2  -23.10   41.10
 -16  13  -2   -2.80   26.50
 -16  13  -2  -62.39   28.00
  13  16  -2   -6.70   39.20
 -13 -16  -2   31.90   41.50
 -16  12   2   -1.40   20.60
  16 -12   2  -54.49   38.10
 -12 -16   2  -39.60   31.80
  16 -12   2  -27.10   43.10
  12  16   2    0.10   33.30
 -16  12   2  -22.00   22.40
  12  16   2  -10.40   30.10
 -16  12  -2   -9.10   30.80
 -12 -16  -2 -106.49   39.40
  12  16  -2  -38.30   32.00
 -12 -16  -2  -59.19   32.70
  12  16  -2   32.50   34.10
  16 -12  -2  -94.89   45.90
  16 -12  -2  -47.60   35.20
 -16  12  -2  -26.20   24.30
  11  16   2  -14.00   31.00
  16 -11   2  -41.00   36.90
 -11 -16   2  -70.49   30.10
 -11 -16   2  -21.10   37.50
 -16  11   2   -7.90   21.20
  16 -11   2  -64.89   38.30
 -16  11   2  -27.80   20.50
  11  16   2   49.40   36.00
  16 -11  -2  -56.39   33.10
  11  16  -2   35.80   32.30
 -16  11  -2   13.80   26.70
  11  16  -2  -15.60   32.30
 -11 -16  -2  -62.09   31.30
 -16  11  -2   22.40   31.10
  16 -11  -2   11.70   35.70
 -11 -16  -2   40.90   36.00
  10  16   2  -22.50   27.00
 -16  10   2  -13.10   21.70
 -10 -16   2   69.19   39.00
  16 -10   2   -3.60   38.10
  16 -10   2  -19.80   51.79
 -16  10   2  -12.00   19.10
  10  16   2  -18.50   31.60
 -10 -16  -2  -38.50   29.70
  10  16  -2   -0.90   32.90
  10  16  -2   72.99   37.20
  16 -10  -2  -25.10   30.90
 -16  10  -2   -8.50   28.60
 -10 -16  -2   46.30   34.00
  16 -10  -2  -40.50   33.50
 -16  10  -2   36.40   26.30
   9  16   2  -10.90   32.50
 -16   9   2  -36.90   24.60
 -16   9   2  -22.10   19.40
  -9 -16   2  -33.20   29.90
  16  -9   2  -46.10   27.30
   9  16   2    5.90   29.20
  16  -9   2   -3.70   32.00
  -9 -16   2   -6.20   30.80
  -9 -16  -2  -43.60   31.80
  16  -9  -2   24.10   33.20
  -9 -16  -2    1.00   32.30
   9  16  -2    2.80   28.50
 -16   9  -2   23.20   25.10
   9  16  -2   39.10   36.70
  16  -9  -2   50.99   39.10
 -16   9  -2    5.50   28.90
   8  16   2  -16.80   28.80
  -8 -16   2  -47.00   30.40
   8  16   2   14.20   24.40
 -16   8   2  -26.60   17.20
  -8 -16   2  -34.50   26.80
  16  -8   2   53.19   31.90
 -16   8   2   -2.30   18.80
  16  -8   2   19.40   29.00
   8  16  -2  -15.80   29.70
  -8 -16  -2  -63.09   29.90
  -8 -16  -2   22.40   39.70
   8  16  -2  -45.00   29.00
  16  -8  -2  -22.60   35.30
 -16   8  -2   43.20   25.90
 -16   8  -2  -17.70   27.80
  16  -8  -2  -40.80   30.00
  16  -7   2   -5.30   27.30
   7  16   2  -42.60   25.20
   7  16   2  -18.90   21.60
 -16   7   2   27.50   23.90
 -16   7   2  -41.30   22.90
  -7 -16   2  -28.10   27.10
  -7 -16   2  -31.30   30.50
  16  -7   2  -36.90   29.20
 -16   7  -2  -10.90   26.70
   7  16  -2   29.10   29.20
   7  16  -2  -35.50   27.30
  -7 -16  -2  -30.90   29.70
 -16   7  -2   19.70   24.60
  16  -7  -2   20.90   29.60
  -7 -16  -2  -32.70   26.80
  16  -7  -2   -8.50   29.30
  16  -6   2   -5.70   29.30
 -16   6   2   13.00   21.90
 -16   6   2   27.40   23.40
   6  16   2  -15.10   22.80
  -6 -16   2   -5.90   28.30
   6  16   2   23.80   29.30
  16  -6   2  -14.80   32.10
  -6 -16   2  -11.50   33.10
 -16   6  -2   12.00   29.10
   6  16  -2  -10.40   26.30
  16  -6  -2    9.60   30.10
  -6 -16  -2   49.20   32.60
   6  16  -2  -34.40   31.20
  16  -6  -2   33.60   32.90
 -16   6  -2    4.20   24.40
  -6 -16  -2  -16.20   33.20
  16  -5   2    3.90   35.20
  -5 -16   2  -20.70   26.20
   5  16   2    8.00   22.10
 -16   5   2   27.30   23.90
 -16   5   2   42.20   20.40
  16  -5   2  -13.30   25.90
  -5 -16   2   41.10   32.10
   5  16   2  -29.30   25.80
   5  16  -2  -19.40   28.10
  16  -5  -2    8.20   29.80
  16  -5  -2  -27.10   32.20
  -5 -16  -2   -8.50   30.60
 -16   5  -2   56.69   29.20
   5  16  -2   13.80   43.10
 -16   5  -2    1.20   28.50
  -5 -16  -2    0.40   30.60
  16  -4   2   73.49   34.00
 -16   4   2   23.40   22.10
 -16   4   2   43.60   24.80
  16  -4   2   83.19   34.60
  -4 -16   2   69.59   33.50
  -4 -16   2    4.40   32.90
   4  16   2   59.99   31.50
   4  16   2   68.39   29.40
   4  16  -2    4.50   30.80
 -16   4  -2   39.80   30.50
  -4 -16  -2  134.29   41.00
  16  -4  -2   20.80   28.60
   4  16  -2   75.59   32.70
 -16   4  -2   36.20   23.40
  16  -4  -2   56.49   39.50
  -4 -16  -2   58.89   34.50
   3  16   2   40.00   24.40
   3  16   2   -3.60   24.30
  16  -3   2   -7.50   29.20
 -16   3   2   31.60   19.50
 -16   3   2    2.70   22.50
  16  -3   2    2.30   23.90
  -3 -16   2    7.20   26.30
   3  16  -2   -9.50   25.80
  16  -3  -2  -13.90   30.30
  16  -3  -2   58.79   27.60
  -3 -16  -2   13.20   28.90
 -16   3  -2   12.10   21.90
  -3 -16  -2    0.50   29.40
   3  16  -2   61.39   35.60
 -16   3  -2    4.50   26.60
  16  -2   2  133.99   33.30
  -2 -16   2   49.50   30.90
 -16   2   2  115.09   29.50
   2  16   2  130.39   35.30
 -16   2   2   84.69   29.30
   2  16   2  120.59   31.30
  16  -2   2  144.79   37.40
  16  -2  -2  101.89   37.00
  16  -2  -2  132.79   36.20
 -16   2  -2  247.98   42.90
 -16   2  -2  115.39   35.70
  -2 -16  -2   39.70   31.20
  -2 -16  -2   89.49   38.60
   2  16  -2  160.98   41.20
   2  16  -2  107.79   33.50
 -16   1   2  165.68   37.70
  -1 -16   2  164.58   40.50
  16  -1   2  139.29   37.60
  16  -1   2  179.78   39.40
 -16   1   2  154.68   31.40
   1  16   2  216.18   38.00
   1  16   2  181.68   39.80
  -1 -16  -2  107.39   34.10
   1  16  -2  199.68   40.40
   1  16  -2  181.78   42.30
 -16   1  -2  192.38   40.50
 -16   1  -2  239.28   44.70
  16  -1  -2  143.39   40.80
  16  -1  -2  170.68   39.10
   0 -16   2   22.70   29.30
  16   0   2  -13.50   22.60
 -16   0   2   13.30   20.10
   0 -16   2   10.10   29.90
 -16   0   2   -9.90   24.60
   0  16   2   12.60   26.20
   0  16   2   28.60   24.40
  16   0   2   52.99   31.30
   0  16  -2   59.99   28.80
  16   0  -2   67.39   31.70
  16   0  -2   18.00   32.40
 -16   0  -2   44.80   29.20
   0 -16  -2   63.59   30.60
   0  16  -2   38.90   31.70
 -16   0  -2   50.49   32.00
   1 -16   2  123.29   37.50
 -16  -1   2  121.79   27.10
   1 -16   2  120.09   37.20
 -16  -1   2  157.18   36.70
  16   1   2  140.79   37.50
  -1  16   2  158.48   35.60
  -1  16   2  145.79   34.80
  16   1   2  215.98   41.50
  -1  16  -2  119.19   38.60
 -16  -1  -2  176.18   41.10
  16   1  -2  205.48   44.30
  -1  16  -2  197.48   41.00
  16   1  -2  189.08   39.80
   1 -16  -2   88.89   33.70
   1 -16  -2  153.48   40.10
 -16  -1  -2  194.78   42.90
  -2  16   2  109.69   34.40
  16   2   2   48.90   32.30
   2 -16   2   35.20   28.10
 -16  -2   2   97.19   28.30
 -16  -2   2   85.69   33.00
  16   2   2   59.79   30.70
  -2  16   2  122.49   31.30
   2 -16   2  137.69   41.10
 -16  -2  -2  128.39   36.90
  -2  16  -2  137.39   39.20
   2 -16  -2  232.18   45.80
 -16  -2  -2  187.78   42.50
   2 -16  -2   79.39   33.60
  16   2  -2  141.89   40.60
  16   2  -2  153.18   38.90
  -2  16  -2  116.39   33.10
 -16  -3   2   58.49   26.50
  16   3   2   -1.00   28.00
  -3  16   2  -23.90   25.20
  16   3   2    5.50   26.00
   3 -16   2   -2.40   28.30
 -16  -3   2    7.60   28.10
   3 -16   2  -40.70   30.60
  -3  16   2   -1.60   21.10
   3 -16  -2  -12.40   30.10
  -3  16  -2   43.90   26.00
 -16  -3  -2   21.90   31.30
  16   3  -2  -11.80   28.30
  16   3  -2   48.10   34.20
  -3  16  -2    6.80   29.50
   3 -16  -2   44.40   31.30
 -16  -3  -2   10.10   28.70
 -16  -4   2   54.69   26.30
  -4  16   2   15.30   29.10
  16   4   2  105.89   32.50
  -4  16   2   29.30   23.00
  16   4   2   27.40   29.30
 -16  -4   2   40.90   28.70
   4 -16   2   25.30   30.50
   4 -16   2  -40.50   28.60
  16   4  -2  -21.40   26.70
  -4  16  -2   22.50   31.30
  16   4  -2  -11.30   29.20
 -16  -4  -2   50.69   31.90
   4 -16  -2  -68.49   29.10
 -16  -4  -2   29.70   30.20
  -4  16  -2   66.69   32.40
   4 -16  -2   21.70   32.50
   5 -16   2  -39.70   28.20
 -16  -5   2  -30.90   27.50
  16   5   2   20.50   29.50
   5 -16   2  -36.70   28.00
 -16  -5   2   10.20   22.40
  16   5   2  -24.10   24.70
  -5  16   2  -28.60   18.50
  -5  16   2   -9.60   27.00
 -16  -5  -2   -8.20   29.90
   5 -16  -2   77.59   36.40
  16   5  -2   45.20   31.60
  16   5  -2   18.80   29.70
   5 -16  -2   41.30   33.40
  -5  16  -2    8.30   27.00
 -16  -5  -2    4.10   26.80
 -16  -6   2    0.90   17.10
   6 -16   2   42.20   30.60
  16   6   2   14.10   29.00
  -6  16   2   20.60   22.80
 -16  -6   2   32.70   26.20
  16   6   2  -20.30   23.80
   6 -16   2   26.60   36.20
  -6  16   2  -22.60   29.40
   6 -16  -2   49.90   32.10
  16   6  -2    2.60   29.00
  16   6  -2   22.70   32.00
 -16  -6  -2   55.69   35.40
  -6  16  -2   17.70   24.80
  -6  16  -2  -12.80   30.80
 -16  -6  -2   20.50   30.40
   6 -16  -2   39.30   33.50
   7 -16   2    1.70   32.80
  -7  16   2  -33.60   25.40
  16   7   2   38.70   27.40
 -16  -7   2  -25.40   20.90
  -7  16   2    1.80   21.90
 -16  -7   2   -8.00   26.40
   7 -16   2  -42.30   26.30
  16   7   2    3.10   28.10
  16   7  -2   -4.30   34.40
   7 -16  -2   25.00   33.00
   7 -16  -2   -2.20   28.90
 -16  -7  -2  -11.90   29.40
  -7  16  -2   25.80   27.20
  -7  16  -2    5.90   30.70
  -8  16   2   23.30   23.20
  16   8   2   -8.00   26.40
  16   8   2   52.99   32.60
   8 -16   2  -36.60   24.90
   8 -16   2   22.00   34.60
 -16  -8   2  -10.40   31.10
  -8  16   2   45.70   32.30
 -16  -8   2   29.50   29.80
  16   8  -2    4.70   30.60
  -8  16  -2  -16.90   25.30
 -16  -8  -2  -70.99   26.30
 -16  -8  -2   67.29   35.10
  16   8  -2  -23.40   26.80
  -8  16  -2   11.60   32.10
   8 -16  -2   12.30   34.00
   8 -16  -2   49.40   35.90
  16   9   2   31.00   30.20
 -16  -9   2   42.10   31.80
 -16  -9   2    4.90   34.10
  -9  16   2  -65.69   22.50
  16   9   2  -48.70   26.70
   9 -16   2   12.80   37.60
   9 -16   2   -8.80   33.90
  -9  16   2   26.60   25.40
   9 -16  -2   24.70   38.50
 -16  -9  -2  -61.19   29.70
 -16  -9  -2   31.80   32.30
  -9  16  -2  -13.90   26.30
  -9  16  -2  -27.70   30.40
  16   9  -2   -3.60   30.30
  16   9  -2   12.70   33.40
   9 -16  -2   28.40   50.39
 -16 -10   2  -10.20   35.20
 -10  16   2   35.20   25.00
  16  10   2   27.70   35.00
 -10  16   2  -50.09   27.80
  16  10   2  -74.49   27.80
  10 -16   2   62.29   41.50
 -16 -10   2  -29.60   30.30
  16  10  -2  -36.20   29.30
  10 -16  -2  -57.89   31.10
  16  10  -2   13.70   30.90
 -16 -10  -2  -35.50   31.00
  10 -16  -2    1.20   33.90
 -16 -10  -2   25.00   36.40
 -10  16  -2  -22.70   28.30
 -10  16  -2    0.50   34.10
  11 -16   2  -67.09   48.00
  11 -16   2   -5.10   45.30
 -11  16   2   -7.60   25.70
 -11  16   2  -20.20   31.30
 -16 -11   2  -19.40   30.70
  16  11   2  -31.40   30.00
  16  11   2  -28.40   29.10
 -16 -11   2  -42.70   36.40
  11 -16  -2  -32.80   30.20
  16  11  -2  -37.00   28.30
  11 -16  -2   -7.80   34.90
 -16 -11  -2  -19.80   28.00
  16  11  -2  -23.30   33.40
 -16 -11  -2  -13.40   31.70
 -11  16  -2   28.60   27.40
 -11  16  -2  -44.20   30.60
  12 -16   2  -46.60   39.40
 -12  16   2   -1.10   22.00
 -16 -12   2  -36.20   36.50
 -12  16   2   -5.10   35.60
  12 -16   2  -46.90   36.80
 -16 -12   2   -6.90   34.50
  16  12   2  -21.70   34.80
  16  12   2  -49.90   35.70
  16  12  -2  -78.09   31.60
  16  12  -2   -6.60   34.10
 -16 -12  -2  -45.70   37.70
 -16 -12  -2  -53.19   32.90
  12 -16  -2  -46.90   53.59
  12 -16  -2  -67.09   36.00
  16  13   2  -41.60   32.60
 -16 -13   2  -20.30   41.50
  13 -16   2 -103.19   38.10
 -13  16   2  -10.30   27.60
 -16 -13   2  -18.30   44.60
  13 -16   2   -2.30   39.00
  16  13  -2  -44.60   33.70
 -16 -13  -2  -39.60   40.10
 -13  16  -2  -47.50   25.50
 -16 -13  -2  -57.29   38.00
  13 -16  -2    1.90   43.20
[truncated: 1,064,304 more chars]
